# Supplementary material for: Reframing the climate policy game
Source: Research Square preprint supplement (doi:10.21203/rs.3.rs-150151/v1), 2021-02-01
Supplement: Supplementary file 2 [file 4df91bce389dd62ec8bd3f6e.xlsx]

## Sheet: NOTES
Supplementary Dataset 2, Mercure et al., "Reframing the climate policy game", under review, Nature Climate Change 2020
Global database of oil and gas resources and reserves
Notes for the use and interpretation of the data in this spreadsheet
Data is obtained from the Rystad Ucube 2020
Pages as follows:
Rystad:			Break-even cost, 1P, 2P and production data for over 120,000 sites. Some produce both fuels.
Oil and Gas Distributions:			Aggregation of the resource data in the Rystad page under the 61 region classification of E3ME
E3ME Regions:			Region classification for E3ME

## Sheet: Rystad
E3MERegion	Country	BreakevenOilPrice_USD_per_bbl	BreakevenGasPrice_USD_per_bbl	DevelopmentCostPerBOE_USD_per_bbl	OilProd2018	Oil1P2018	Oil2P2018	OilRes2018	GasProd2018	Gas1P2018	Gas2P2018	GasRes2018
1	Belgium	0	0	0	0	0	0	0	0	0	0	0
1	Belgium	98.5	65.64	4.31416	0	0	0	0	0	0	0	0.241084
1	Belgium	21.9	14.64	18.3536	0	0	0	0	0	0	0	0.746847
1	Belgium	100	66.66	8.90849	0	0	0	0	0	0	0	0.309453
1	Belgium	0	0	0	0	0	0	0	0	0	0	0
1	Belgium	0	0	0	0	0	0	0	0	0	0	0
1	Belgium	98.5	65.64	4.31416	0	0	0	0	0	0	0	0.241084
1	Belgium	21.9	14.64	18.3536	0	0	0	0	0	0	0	0.746847
1	Belgium	100	66.66	8.90849	0	0	0	0	0	0	0	0.309453
2	Denmark	0	0	0	0	0	0	0	0	0	0	0
2	Denmark	0	0	0	0	0	0	0	0	0	0	0
2	Denmark	68.3	45.54	39.4179	0	0	0	0.129478	0	0	0	0.056951
2	Denmark	62.4	41.64	35.7732	0	0	0	0.180611	0	0	0	0.0897476
2	Denmark	64.9	43.26	33.9461	0	0	0	0.231204	0	0	0	0.122586
2	Denmark	52.5	34.98	29.0854	0	0	0	0.0587797	0	0	0	0.0391154
2	Denmark	50.6	33.72	22.08	0	0	0	5.13396	0	0	0	12.4805
2	Denmark	55.3	36.84	24.401	0	0	0	1.19668	0	0	0	1.73312
2	Denmark	42.7	28.5	21.7949	0	0	0	3.69018	0	0	0	2.51603
2	Denmark	75	49.98	36.2698	0	0	0	0.35685	0	0	0	0.289117
2	Denmark	0	0	8.40502	0	0	0	0	0	0	0	0
2	Denmark	49.8	33.24	19.9099	0	0	0	23.6707	0	0	0	0
2	Denmark	54.2853	36.1497	0.124812	3.04957	15.9755	19.5886	24.9756	0.696726	3.8478	7.98732	11.0015
2	Denmark	49	32.7	35.1378	0	0	0	2.62123	0	0	0	0
2	Denmark	61	40.68	32.4945	0	0	0	0	0	0	0	0
2	Denmark	64.9603	43.3224	1.1548	0.728266	2.18196	2.6186	5.0889	0.0853036	2.18024	7.38521	11.383
2	Denmark	46.3	30.84	16.928	0	0	0	17.1875	0	0	0	4.28584
2	Denmark	32.2707	21.4977	0.366998	6.47395	31.189	44.0791	66.2377	3.10097	12.4902	22.4011	28.2835
2	Denmark	101.4	67.56	2.20684	0.0271296	0.113018	0.126197	0.126658	0.500912	2.09973	2.30471	2.31072
2	Denmark	37.3832	24.922	2.22001	0.29173	0.706384	0.904433	2.44249	0.0807265	0.260868	0.508406	0.681183
2	Denmark	35.7	23.82	1.18897	0.0282528	0.292058	0.315577	0.316145	0.0213127	0.187201	0.198347	0.198546
2	Denmark	0	0	4.34624	0	0	0	0	0	0	0	0
2	Denmark	50.1	33.36	0.52814	0.269136	0.466656	0.475667	0.475719	0.721083	4.02652	4.45991	4.4739
2	Denmark	137.1	91.44	3.09477	0.127181	0.450068	0.466864	0.467052	0.00271382	0.0153153	0.0157412	0.0157447
2	Denmark	31.4815	21.0181	1.09724	0.959688	5.68947	6.7662	10.871	0.14123	0.736612	1.01691	1.17799
2	Denmark	63.6	42.42	30.9845	0	0	0	0.585276	0	0	0	0.353623
2	Denmark	0	0	0.792606	0	0	0	0	0	0	0	0
2	Denmark	0	0	0	0	0	0	0	0	0	0	0
2	Denmark	31.0046	20.6467	13.3622	0	0	1.72798	34.5597	0	9.78842	34.9604	54.3801
2	Denmark	27	18.06	1.17154	0.858125	4.38136	5.49861	5.58408	1.90267	5.88654	7.01077	7.07518
2	Denmark	0	0	1.97508	0.95161	1.54857	1.57709	1.57725	1.77853	2.46425	2.53276	2.53333
2	Denmark	30.8939	20.6213	0.843545	1.53947	3.32499	4.98609	12.7998	0.691499	2.39112	4.52346	5.84956
2	Denmark	250	166.68	0	0	0	0	0.00213385	0	0	0	0.00122216
2	Denmark	95	63.36	32.1162	0	0	0	2.07295	0	0	0	1.2929
2	Denmark	69.4	46.26	38.4935	0	0	0	0.173897	0	0	0	0.112272
2	Denmark	0	0	0	0	0	0	0	0	0	0	0
2	Denmark	34.2366	22.8723	3.7826	2.19432	6.43168	24.5008	24.5008	0.676509	2.77997	5.21702	6.84288
2	Denmark	0	0	0	0	0	0	0	0	0	0	0
2	Denmark	0	0	0	0	0	0	0	0	0	0	0
2	Denmark	0	0	0	0	0	0	0	0	0	0	0
2	Denmark	0	0	0	0	0	0	0	0	0	0	0
2	Denmark	0	0	0	0	0	0	0	0	0	0	0
2	Denmark	0	0	0	0	0	0	0	0	0	0	0
2	Denmark	0	0	0	0	0	0	0	0	0	0	0
2	Denmark	0	0	0	0	0	0	0	0	0	0	0
2	Denmark	0	0	0	0	0	0	0	0	0	0	0
2	Denmark	0	0	0	0	0	0	0	0	0	0	0
2	Denmark	0	0	0	0	0	0	0	0	0	0	0
2	Denmark	0	0	0	0	0	0	0	0	0	0	0
2	Denmark	0	0	0	0	0	0	0	0	0	0	0
2	Denmark	0	0	0	0	0	0	0	0	0	0	0
2	Denmark	0	0	0	0	0	0	0	0	0	0	0
2	Denmark	0	0	0	0	0	0	0	0	0	0	0
2	Denmark	0	0	0	0	0	0	0	0	0	0	0
2	Denmark	0	0	0	0	0	0	0	0	0	0	0
2	Denmark	0	0	0	0	0	0	0	0	0	0	0
2	Denmark	0	0	0	0	0	0	0	0	0	0	0
2	Denmark	0	0	0	0	0	0	0	0	0	0	0
2	Denmark	0	0	0	0	0	0	0	0	0	0	0
2	Denmark	0	0	0	0	0	0	0	0	0	0	0
2	Denmark	0	0	0	0	0	0	0	0	0	0	0
2	Denmark	0	0	0	0	0	0	0	0	0	0	0
2	Denmark	0	0	0	0	0	0	0	0	0	0	0
2	Denmark	0	0	0	0	0	0	0	0	0	0	0
2	Denmark	0	0	0	0	0	0	0	0	0	0	0
2	Denmark	0	0	0	0	0	0	0	0	0	0	0
2	Denmark	0	0	0	0	0	0	0	0	0	0	0
2	Denmark	0	0	0	0	0	0	0	0	0	0	0
2	Denmark	0	0	0	0	0	0	0	0	0	0	0
2	Denmark	0	0	0	0	0	0	0	0	0	0	0
2	Denmark	0	0	0	0	0	0	0	0	0	0	0
2	Denmark	0	0	0	0	0	0	0	0	0	0	0
2	Denmark	0	0	0	0	0	0	0	0	0	0	0
2	Denmark	0	0	0	0	0	0	0	0	0	0	0
2	Denmark	0	0	0	0	0	0	0	0	0	0	0
2	Denmark	0	0	0	0	0	0	0	0	0	0	0
2	Denmark	0	0	0	0	0	0	0	0	0	0	0
2	Denmark	0	0	0	0	0	0	0	0	0	0	0
2	Denmark	0	0	0	0	0	0	0	0	0	0	0
2	Denmark	0	0	0	0	0	0	0	0	0	0	0
2	Denmark	0	0	0	0	0	0	0	0	0	0	0
2	Denmark	0	0	0	0	0	0	0	0	0	0	0
2	Denmark	0	0	0	0	0	0	0	0	0	0	0
2	Denmark	0	0	0	0	0	0	0	0	0	0	0
2	Denmark	0	0	0	0	0	0	0	0	0	0	0
2	Denmark	0	0	0	0	0	0	0	0	0	0	0
2	Denmark	0	0	0	0	0	0	0	0	0	0	0
2	Denmark	0	0	0	0	0	0	0	0	0	0	0
2	Denmark	0	0	0	0	0	0	0	0	0	0	0
2	Denmark	0	0	0	0	0	0	0	0	0	0	0
2	Denmark	0	0	0	0	0	0	0	0	0	0	0
2	Denmark	0	0	0	0	0	0	0	0	0	0	0
2	Denmark	0	0	0	0	0	0	0	0	0	0	0
2	Denmark	0	0	0	0	0	0	0	0	0	0	0
2	Denmark	0	0	0	0	0	0	0	0	0	0	0
2	Denmark	0	0	0	0	0	0	0	0	0	0	0
2	Denmark	0	0	0	0	0	0	0	0	0	0	0
2	Denmark	0	0	0	0	0	0	0	0	0	0	0
2	Denmark	0	0	0	0	0	0	0	0	0	0	0
2	Denmark	0	0	0	0	0	0	0	0	0	0	0
2	Denmark	0	0	0	0	0	0	0	0	0	0	0
2	Denmark	0	0	0	0	0	0	0	0	0	0	0
2	Denmark	0	0	0	0	0	0	0	0	0	0	0
2	Denmark	0	0	0	0	0	0	0	0	0	0	0
2	Denmark	0	0	0	0	0	0	0	0	0	0	0
2	Denmark	0	0	0	0	0	0	0	0	0	0	0
2	Denmark	0	0	0	0	0	0	0	0	0	0	0
2	Denmark	0	0	0	0	0	0	0	0	0	0	0
2	Denmark	0	0	0	0	0	0	0	0	0	0	0
2	Denmark	0	0	0	0	0	0	0	0	0	0	0
2	Denmark	0	0	0	0	0	0	0	0	0	0	0
2	Denmark	0	0	0	0	0	0	0	0	0	0	0
2	Denmark	0	0	0	0	0	0	0	0	0	0	0
2	Denmark	0	0	0	0	0	0	0	0	0	0	0
2	Denmark	0	0	0	0	0	0	0	0	0	0	0
2	Denmark	0	0	0	0	0	0	0	0	0	0	0
2	Denmark	0	0	0	0	0	0	0	0	0	0	0
2	Denmark	0	0	0	0	0	0	0	0	0	0	0
2	Denmark	0	0	0	0	0	0	0	0	0	0	0
2	Denmark	28.1	18.78	7.91127	0	0	0	2.11021	0	0	0	10.7011
2	Denmark	0	0	0	0	0	0	0	0	0	0	0
2	Denmark	58.3	38.88	23.9903	0	0	0	1.74599	0	0	0	5.8332
2	Denmark	17.1	11.4	1.74979	0	0	0	4.62228	0	0	0	16.7046
2	Denmark	45.1	30.06	21.3696	0	0	0.220499	4.40996	0	0.931844	3.32818	5.17691
2	Denmark	250	166.68	249.629	0	0	0	0	0	0	0	0
2	Denmark	48.9	32.58	19.8653	0	0	0	12.6669	0	0	0	44.8652
2	Denmark	0	0	0	0	0	0	0	0	0	0	0
2	Denmark	0	0	0	0	0	0	0	0	0	0	0
2	Denmark	0	0	0	0	0	0	0	0	0	0	0
2	Denmark	0	0	0	0	0	0	0	0	0	0	0
2	Denmark	68.3	45.54	39.4179	0	0	0	0.110296	0	0	0	0.0485138
2	Denmark	62.4	41.64	35.7732	0	0	0	0.153854	0	0	0	0.0764516
2	Denmark	64.9	43.26	33.9461	0	0	0	0.196952	0	0	0	0.104425
2	Denmark	52.5	34.98	29.0854	0	0	0	0.0500715	0	0	0	0.0333206
2	Denmark	50.6	33.72	22.08	0	0	0	4.37337	0	0	0	10.6316
2	Denmark	55.3	36.84	24.401	0	0	0	1.01939	0	0	0	1.47636
2	Denmark	42.7	28.5	21.7949	0	0	0	3.14349	0	0	0	2.14329
2	Denmark	75	49.98	36.2698	0	0	0	0.303983	0	0	0	0.246285
2	Denmark	0	0	8.40502	0	0	0	0	0	0	0	0
2	Denmark	49.8	33.24	19.9099	0	0	0	20.1639	0	0	0	0
2	Denmark	54.2853	36.1497	0.124812	2.59779	13.6088	16.6866	21.2755	0.593507	3.27775	6.80402	9.37164
2	Denmark	49	32.7	35.1378	0	0	0	2.2329	0	0	0	0
2	Denmark	61	40.68	32.4945	0	0	0	0	0	0	0	0
2	Denmark	64.9603	43.3224	1.1548	0.620374	1.85871	2.23066	4.33499	0.072666	1.85724	6.29111	9.69663
2	Denmark	46.3	30.84	16.928	0	0	0	14.6412	0	0	0	3.6509
2	Denmark	32.2707	21.4977	0.366998	5.51485	26.5684	37.5489	56.4247	2.64157	10.6398	19.0824	24.0934
2	Denmark	101.4	67.56	2.20684	0.0231104	0.0962747	0.107501	0.107894	0.426703	1.78866	1.96327	1.96839
2	Denmark	37.3832	24.922	2.22001	0.24851	0.601734	0.770443	2.08064	0.0687671	0.222221	0.433086	0.580267
2	Denmark	35.7	23.82	1.18897	0.0371472	0.384002	0.414925	0.415672	0.0280223	0.246135	0.26079	0.261052
2	Denmark	0	0	0	0	0	0	0	0	0	0	0
2	Denmark	0	0	4.34624	0	0	0	0	0	0	0	0
2	Denmark	50.1	33.36	0.52814	0.229264	0.397522	0.405198	0.405242	0.614256	3.43	3.79918	3.8111
2	Denmark	137.1	91.44	3.09477	0.108339	0.383391	0.397699	0.397859	0.00231178	0.0130463	0.0134092	0.0134121
2	Denmark	31.4815	21.0181	1.09724	0.817512	4.84659	5.7638	9.26048	0.120307	0.627484	0.866255	1.00347
2	Denmark	73.2	48.78	51.9057	0	0	0	0.122176	0	0	0	0
2	Denmark	63.6	42.42	30.9845	0	0	0	0.498568	0	0	0	0.301234
2	Denmark	0	0	0.792606	0	0	0	0	0	0	0	0
2	Denmark	31.0046	20.6467	13.3622	0	0	1.47199	29.4397	0	8.33828	29.7811	46.3238
2	Denmark	27	18.06	1.17154	0.730995	3.73227	4.684	4.75681	1.62079	5.01446	5.97214	6.02701
2	Denmark	0	0	1.97508	0.81063	1.31915	1.34345	1.34359	1.51504	2.09917	2.15754	2.15802
2	Denmark	30.8939	20.6213	0.843545	1.3114	2.8324	4.24741	10.9035	0.589054	2.03688	3.85331	4.98296
2	Denmark	250	166.68	0	0	0	0	0.018238	0	0	0	0.0104458
2	Denmark	75	49.98	61.5009	0	0	0	0.0513046	0	0	0	0.0301538
2	Denmark	60.3	40.2	20.8159	0	0	0	0.307992	0	0	0	0.202779
2	Denmark	133.3	88.86	44.1493	0	0	0	0.0081644	0	0	0	0.0051904
2	Denmark	68	45.3	28.0348	0	0	0	0.433689	0	0	0	0.26021
2	Denmark	45.3	30.24	15.0622	0	0	0	0.0842422	0	0	0	0.0516602
2	Denmark	71.9	47.88	32.9309	0	0	0	0.0858902	0	0	0	0.0414174
2	Denmark	52	34.62	27.3196	0	0	0	0.324249	0	0	0	0.20329
2	Denmark	85	56.64	38.1722	0	0	0	0.190467	0	0	0	0.127352
2	Denmark	68.3	45.54	39.4179	0	0	0	0.0599434	0	0	0	0.0263662
2	Denmark	62.4	41.64	35.7732	0	0	0	0.0836162	0	0	0	0.0415498
2	Denmark	64.9	43.26	33.9461	0	0	0	0.107039	0	0	0	0.0567528
2	Denmark	95	63.36	32.1162	0	0	0	0.518239	0	0	0	0.323225
2	Denmark	52.5	34.98	29.0854	0	0	0	0.0272128	0	0	0	0.018109
2	Denmark	59.7	39.78	21.7465	0	0	0	0.214346	0	0	0	0.137516
2	Denmark	50.6	33.72	22.08	0	0	0	2.37683	0	0	0	5.77802
2	Denmark	55.3	36.84	24.401	0	0	0	0.554018	0	0	0	0.802371
2	Denmark	44.7	29.76	20.8448	0	0	0	1.38031	0	0	0	1.12025
2	Denmark	42.7	28.5	21.7949	0	0	0	1.70842	0	0	0	1.16483
2	Denmark	52.6	35.1	15.3513	0	0	0	1.07735	0	0	0	3.97269
2	Denmark	75	49.98	36.2698	0	0	0	0.165208	0	0	0	0.133851
2	Denmark	0	0	8.40502	0	0	0	0	0	0	0	0
2	Denmark	49.8	33.24	19.9099	0	0	0	10.9587	0	0	0	0
2	Denmark	54.2853	36.1497	0.124812	1.41184	7.39608	9.06881	11.5628	0.322558	1.78139	3.69783	5.09328
2	Denmark	0	0	0	0	0	0	0	0	0	0	0
2	Denmark	49	32.7	35.1378	0	0	0	1.21353	0	0	0	0
2	Denmark	61	40.68	32.4945	0	0	0	0	0	0	0	0
2	Denmark	64.9603	43.3224	1.1548	0.33716	1.01017	1.21231	2.35597	0.0394924	1.00937	3.41908	5.26991
2	Denmark	46.3	30.84	16.928	0	0	0	7.95719	0	0	0	1.98419
2	Denmark	32.2708	21.4977	0.366998	2.9972	14.4394	20.407	30.6656	1.43564	5.78252	10.3709	13.0942
2	Denmark	101.4	67.56	2.20684	0.01256	0.0523232	0.0584246	0.058638	0.231904	0.9721	1.067	1.06977
2	Denmark	0	0	0	0	0	0	0	0	0	0	0
2	Denmark	67.4	44.94	23.0863	0	0	0	0	0	0	0	0
2	Denmark	46.6	31.08	17.1422	0	0	0	5.18595	0	0	0	1.14437
2	Denmark	37.3832	24.922	2.22001	0.13506	0.32703	0.418719	1.13078	0.0373734	0.120772	0.235373	0.315362
2	Denmark	41.3	27.54	15.5386	0	0	0	4.98748	0	0	0	0
2	Denmark	35.7	23.82	1.18897	0.01308	0.135212	0.1461	0.146364	0.009867	0.0866672	0.0918275	0.0919197
2	Denmark	83.2099	55.4802	89.9748	0.200925	0.200869	0.477217	2.15321	0.0107658	0.0336068	0.0897481	0.127887
2	Denmark	0	0	4.34624	0	0	0	0	0	0	0	0
2	Denmark	50.1	33.36	0.52814	0.1246	0.216045	0.220216	0.22024	0.333835	1.86413	2.06477	2.07125
2	Denmark	137.1	91.44	3.09477	0.05888	0.208365	0.216141	0.216228	0.0012564	0.0070904	0.0072876	0.0072892
2	Denmark	31.4815	21.0181	1.09724	0.4443	2.63402	3.1325	5.03287	0.0653842	0.341024	0.470791	0.545364
2	Denmark	48.1	32.1	20.3804	0	0	0.0939468	1.87893	0	0.0744058	0.265748	0.413366
2	Denmark	63.6	42.42	30.9845	0	0	0	0.270961	0	0	0	0.163714
2	Denmark	0	0	0.792606	0	0	0	0	0	0	0	0
2	Denmark	31.0046	20.6467	13.3622	0	0	0.799993	15.9999	0	4.53167	16.1854	25.176
2	Denmark	27	18.06	1.17154	0.39728	2.02841	2.54565	2.58522	0.880865	2.72525	3.24573	3.27555
2	Denmark	0	0	1.97508	0.44056	0.716931	0.730137	0.730209	0.823393	1.14085	1.17257	1.17284
2	Denmark	30.8939	20.6213	0.843545	0.71272	1.53935	2.30837	5.92584	0.320138	1.107	2.09419	2.70813
2	Denmark	133.3	88.86	44.1493	0	0	0	0.00326576	0	0	0	0.00207616
2	Denmark	71.9	47.88	32.9309	0	0	0	0.0343561	0	0	0	0.016567
2	Denmark	52.6	35.1	15.3512	0	0	0	0.430939	0	0	0	1.58908
2	Denmark	41.3	27.54	15.5386	0	0	0	1.99499	0	0	0	0
2	Denmark	133.3	88.86	44.1493	0	0	0	0.00326576	0	0	0	0.00207616
2	Denmark	71.9	47.88	32.9309	0	0	0	0.0332824	0	0	0	0.0160492
2	Denmark	69.4	46.26	38.4935	0	0	0	0.0048154	0	0	0	0.00310893
2	Denmark	52.6	35.1	15.3512	0	0	0	0.430939	0	0	0	1.58908
2	Denmark	41.3	27.54	15.5386	0	0	0	1.99499	0	0	0	0
2	Denmark	34.2366	22.8723	3.7826	0.060763	0.1781	0.678452	0.678452	0.0187333	0.0769802	0.144465	0.189487
2	Denmark	133.3	88.86	44.1493	0	0	0	0.00979728	0	0	0	0.00622848
2	Denmark	71.9	47.88	32.9309	0	0	0	0.104142	0	0	0	0.0502186
2	Denmark	52.6	35.1	15.3512	0	0	0	1.29282	0	0	0	4.76723
2	Denmark	41.3	27.54	15.5386	0	0	0	5.98498	0	0	0	0
2	Denmark	0	0	0	0.87162	0	0	0	0	0	0	0
2	Denmark	0	0	0	0	0	0	0	0	0	0	0
2	Denmark	133.3	88.86	44.1493	0	0	0	0.0163288	0	0	0	0.0103808
2	Denmark	71.9	47.88	32.9309	0	0	0	0.17178	0	0	0	0.0828348
2	Denmark	52.6	35.1	15.3513	0	0	0	2.15469	0	0	0	7.94539
2	Denmark	0	0	0	0	0	0	0	0	0	0	0
2	Denmark	41.3	27.54	15.5386	0	0	0	9.97497	0	0	0	0
2	Denmark	60.3	40.2	20.8159	0	0	0	1.23197	0	0	0	0.811118
2	Denmark	250	166.68	0	0	0	0	0.0319185	0	0	0	0.0182813
2	Denmark	75	49.98	61.5009	0	0	0	0.123131	0	0	0	0.0723691
2	Denmark	94.1	62.7	28.4392	0	0	0	0.15371	0	0	0	0
2	Denmark	45.3	30.24	15.0622	0	0	0	0.147424	0	0	0	0.0904053
2	Denmark	85	56.64	28.1175	0	0	0	0.218329	0	0	0	0
2	Denmark	85	56.64	38.1722	0	0	0	0.45712	0	0	0	0.305646
2	Denmark	149.6	99.72	36.5497	0	0	0	0.165351	0	0	0	0
2	Denmark	69.4	46.26	38.4935	0	0	0	0.104056	0	0	0	0.0671806
2	Denmark	192.9	250.02	20.9407	0.107016	0.245911	0.265387	0.26585	0	0	0	0
2	Denmark	0	0	0	0	0	0	0	0	0	0	0
2	Denmark	67.4	44.94	23.0863	0	0	0	0	0	0	0	0
2	Denmark	35.7	23.82	1.18897	0.05232	0.540848	0.584402	0.585454	0.039468	0.346669	0.36731	0.367679
2	Denmark	0	0	22.2672	0.400002	1.08525	1.08525	1.08525	0	0	0	0
2	Denmark	19.3795	250.02	9.50688	0.106329	0.194723	2.1381	2.58068	0	0	0	0
2	Denmark	64.7994	250.02	4.78204	1.0249	1.93854	5.81752	8.39625	0	0	0	0
2	Denmark	73.2	48.78	51.9057	0	0	0	0.305441	0	0	0	0
2	Denmark	48.1	32.1	20.3804	0	0	0.164407	3.28814	0	0.13021	0.465059	0.72339
2	Denmark	34.2366	22.8723	3.7826	1.31302	3.84855	14.6606	14.6606	0.404805	1.66346	3.12173	4.0946
2	Denmark	250	166.68	0	0	0	0	0.0252231	0	0	0	0.0144465
2	Denmark	75	49.98	61.5009	0	0	0	0.0820874	0	0	0	0.0482461
2	Denmark	45.3	30.24	15.0622	0	0	0	0.126363	0	0	0	0.0774903
2	Denmark	85	56.64	38.1722	0	0	0	0.304747	0	0	0	0.203764
2	Denmark	0	0	0	0	0	0	0	0	0	0	0
2	Denmark	67.4	44.94	23.0863	0	0	0	0	0	0	0	0
2	Denmark	48.1	32.1	20.3804	0	0	0.14092	2.8184	0	0.111609	0.398622	0.620048
2	Denmark	250	166.68	0	0	0	0	0.0136785	0	0	0	0.00783435
2	Denmark	45.3	30.24	15.0622	0	0	0	0.0631817	0	0	0	0.0387451
2	Denmark	0	0	0	0	0	0	0	0	0	0	0
2	Denmark	48.1	32.1	20.3804	0	0	0.0704601	1.4092	0	0.0558044	0.199311	0.310024
2	Denmark	59.7	39.78	21.7465	0	0	0	0.32152	0	0	0	0.206275
2	Denmark	44.7	29.76	20.8448	0	0	0	2.07047	0	0	0	1.68038
2	Denmark	94.1	62.7	28.4392	0	0	0	0.120772	0	0	0	0
2	Denmark	68	45.3	28.0348	0	0	0	0.759076	0	0	0	0.45544
2	Denmark	85	56.64	28.1175	0	0	0	0.164705	0	0	0	0
2	Denmark	52	34.62	27.3196	0	0	0	0.567526	0	0	0	0.355814
2	Denmark	59.7	39.78	21.7465	0	0	0	0.535866	0	0	0	0.343791
2	Denmark	44.7	29.76	20.8448	0	0	0	3.45078	0	0	0	2.80063
2	Denmark	192.9	250.02	20.9407	0.084084	0.193216	0.208519	0.208882	0	0	0	0
2	Denmark	46.6	31.08	17.1422	0	0	0	9.07684	0	0	0	2.00296
2	Denmark	0	0	22.2672	0.301756	0.818695	0.818695	0.818695	0	0	0	0
2	Denmark	19.3795	250.02	9.50688	0.0802131	0.146896	1.61295	1.94683	0	0	0	0
2	Denmark	83.2099	55.4802	89.9748	0.351675	0.351575	0.835261	3.76871	0.0188432	0.0588212	0.157084	0.223838
2	Denmark	73.2	48.78	51.9057	0	0	0	0.183265	0	0	0	0
2	Denmark	0	0	0	0	0	0	0	0	0	0	0
2	Denmark	0	0	0	0	0	0	0	0	0	0	0
2	Denmark	0	0	0	0	0	0	0	0	0	0	0
2	Denmark	0	0	0	0	0	0	0	0	0	0	0
2	Denmark	0	0	0	0	0	0	0	0	0	0	0
2	Denmark	0	0	0	0	0	0	0	0	0	0	0
2	Denmark	0	0	0	0	0	0	0	0	0	0	0
2	Denmark	0	0	0	0	0	0	0	0	0	0	0
2	Denmark	0	0	0	0	0	0	0	0	0	0	0
2	Denmark	0	0	0	0	0	0	0	0	0	0	0
2	Denmark	93.5	62.34	28.6016	0	0	0	0.968238	0	0	0	1.8178
2	Denmark	0	0	0	0	0	0	0	0	0	0	0
2	Denmark	116.6	77.76	6.34744	0	0	0	1.937	0	0	0	3.82253
2	Denmark	96.7	64.5	27.1614	0	0	0	3.5121	0	0	0	6.81426
2	Denmark	0	0	0	0	0	0	0	0	0	0	0
2	Denmark	0	0	0	0	0	0	0	0	0	0	0
2	Denmark	98.9	65.94	27.7754	0	0	0	3.45564	0	0	0	6.64144
2	Denmark	93	61.98	31.7219	0	0	0	0.636968	0	0	0	1.19671
2	Denmark	0	0	0	0	0	0	0	0	0	0	0
2	Denmark	92.2	57.24	32.7376	0	0	0	0.781202	0	0	0	1.4564
2	Denmark	0	0	0	0	0	0	0	0	0	0	0
2	Denmark	0	0	0	0	0	0	0	0	0	0	0
2	Denmark	90.3	56.04	34.0128	0	0	0	0.931914	0	0	0	1.74618
2	Denmark	0	0	0	0	0	0	0	0	0	0	0
2	Denmark	75	49.98	8.57239	0	0	0	1.43399	0	0	0	2.88652
2	Denmark	0	0	0	0	0	0	0	0	0	0	0
2	Denmark	88	54.6	33.6627	0	0	0	1.07827	0	0	0	2.01541
2	Denmark	87.6	54.42	34.4476	0	0	0	1.16223	0	0	0	2.16559
2	Denmark	88.6	54.96	33.8118	0	0	0	1.3416	0	0	0	2.5175
2	Denmark	91.8	61.2	37.7172	0	0	0	0.932937	0	0	0	1.755
2	Denmark	128	85.32	40.2114	0	0	0	0.114555	0	0	0	0.216581
2	Denmark	146.3	97.56	41.5265	0	0	0	0.082919	0	0	0	0.15858
2	Denmark	85	56.64	35.4728	0	0	0	6.05432	0	0	0	11.4395
2	Denmark	85	56.64	36.7772	0	0	0	0.900061	0	0	0	1.68914
2	Denmark	148.8	92.34	97.9538	0	0	0	0.374659	0	0	0	0.805615
2	Denmark	85	52.74	37.449	0	0	0	1.09712	0	0	0	2.05238
2	Denmark	97.5	65.04	41.141	0	0	0	0.370524	0	0	0	0.700191
2	Denmark	75	49.98	23.6698	0	0	0	1.0748	0	0	0	2.51044
2	Denmark	85	56.64	37.9961	0	0	0	0.860901	0	0	0	1.62895
2	Denmark	85	52.74	40.6925	0	0	0	1.44728	0	0	0	2.70538
2	Denmark	89	59.34	37.9963	0	0	0	0.498309	0	0	0	0.933841
2	Denmark	95.8	63.84	39.2399	0	0	0	0.359931	0	0	0	0.672182
2	Denmark	85	56.64	42.2575	0	0	0	0.841664	0	0	0	1.57394
2	Denmark	85	56.64	36.8785	0	0	0	5.59502	0	0	0	10.52
2	Denmark	85	52.74	41.7186	0	0	0	0.837057	0	0	0	1.5731
2	Denmark	85	56.64	37.7583	0	0	0	5.46715	0	0	0	10.2983
2	Denmark	80	49.68	42.7179	0	0	0	1.00814	0	0	0	1.8889
2	Denmark	85	52.74	39.4985	0	0	0	1.49055	0	0	0	2.7926
2	Denmark	80	49.68	42.5508	0	0	0	0.994495	0	0	0	1.87764
2	Denmark	80	53.34	37.6566	0	0	0	0.639436	0	0	0	1.20076
2	Denmark	41.5	27.66	14.0066	0	0	0	1.06075	0	0	0	2.28652
2	Denmark	41.5	27.66	15.0251	0	0	0	5.30403	0	0	0	10.3708
2	Denmark	80	53.34	37.6765	0	0	0	0.410785	0	0	0	0.771636
2	Denmark	85	56.64	52.4799	0	0	0	0.475641	0	0	0	0.890585
2	Denmark	80	53.34	38.5943	0	0	0	0.53538	0	0	0	0.999547
2	Denmark	80	49.68	49.5478	0	0	0	0.663004	0	0	0	1.23443
2	Denmark	57.3	35.58	28.4771	0	0	0	1.68302	0	0	0	3.2239
2	Denmark	85	56.64	40.7964	0	0	0	0.357868	0	0	0	0.679497
2	Denmark	85	56.64	48.7176	0	0	0	0.421309	0	0	0	0.791045
2	Denmark	75	49.98	38.1576	0	0	0	0.750207	0	0	0	1.48283
2	Denmark	46	30.66	23.7826	0	0	0	0.943628	0	0	0	1.9105
2	Denmark	75	46.56	38.3319	0	0	0	0.870409	0	0	0	1.77004
2	Denmark	80	49.68	52.1473	0	0	0	0.552191	0	0	0	1.02686
2	Denmark	41	27.3	18.1489	0	0	0	5.01898	0	0	0	9.76714
2	Denmark	48.3	32.22	27.1877	0	0	0	0.878315	0	0	0	1.77687
2	Denmark	95.2	63.48	57.1041	0	0	0	0.324488	0	0	0	0.656641
2	Denmark	51.1	34.08	19.7949	0	0	0	0.753953	0	0	0	1.44841
2	Denmark	52.7	35.16	34.6929	0	0	0	5.0373	0	0	0	9.77745
2	Denmark	143.1	95.4	133.995	0	0	0	0.265541	0	0	0	0.503107
2	Denmark	106.3	70.86	32.8208	0	0	0	0.798999	0	0	0	1.61681
2	Denmark	80	49.68	56.8092	0	0	0	0.462443	0	0	0	0.858907
2	Denmark	138.6	92.4	134.125	0	0	0	0.343895	0	0	0	0.652361
2	Denmark	99.4	66.24	35.4087	0	0	0	0.758625	0	0	0	1.53456
2	Denmark	94.7	63.12	61.7066	0	0	0	0.285752	0	0	0	0.544652
2	Denmark	80	49.68	57.9579	0	0	0	0.435312	0	0	0	0.814506
2	Denmark	56.3	34.92	37.1462	0	0	0	2.08052	0	0	0	4.00349
2	Denmark	85	56.64	36.2841	0	0	0	0.720744	0	0	0	1.45705
2	Denmark	75	49.98	43.2868	0	0	0	0.779018	0	0	0	1.44676
2	Denmark	80	49.68	60.2261	0	0	0	0.409428	0	0	0	0.767738
2	Denmark	44.3	29.52	23.3598	0	0	0	5.05456	0	0	0	9.75072
2	Denmark	75	46.56	46.0088	0	0	0	0.925943	0	0	0	1.74557
2	Denmark	56.5	35.04	34.0884	0	0	0	2.15046	0	0	0	4.10148
2	Denmark	143.3	95.52	132.59	0	0	0	0.311381	0	0	0	0.582818
2	Denmark	146.2	97.5	139.554	0	0	0	0.192407	0	0	0	0.424859
2	Denmark	80	49.68	62.3353	0	0	0	0.38544	0	0	0	0.712012
2	Denmark	144.4	96.3	140.621	0	0	0	0.172252	0	0	0	0.371587
2	Denmark	80	53.34	43.2738	0	0	0	0.585132	0	0	0	1.18106
2	Denmark	80	53.34	39.5271	0	0	0	0.261764	0	0	0	0.47898
2	Denmark	56.2	34.86	40.5457	0	0	0	2.22306	0	0	0	4.26012
2	Denmark	80	53.34	109.742	0	0	0	0.645657	0	0	0	1.224
2	Denmark	80	49.68	71.5571	0	0	0	0.381833	0	0	0	0.738062
2	Denmark	80	49.68	51.6998	0	0	0	0.82748	0	0	0	1.48343
2	Denmark	56.6	35.16	41.1211	0	0	0	2.09731	0	0	0	4.07942
2	Denmark	80	53.34	43.7774	0	0	0	0.329336	0	0	0	0.582227
2	Denmark	85	56.64	83.7084	0	0	0	0.249469	0	0	0	0.422827
2	Denmark	49.8	33.18	39.5255	0	0	0	3.67588	0	0	0	6.97869
2	Denmark	80	53.34	58.7226	0	0	0	0.398833	0	0	0	0.793037
2	Denmark	80	53.34	151.659	0	0	0	0.469445	0	0	0	0.826677
2	Denmark	51.7	34.44	42.7545	0	0	0	3.02088	0	0	0	5.57493
2	Denmark	80	53.34	83.4386	0	0	0	0.274676	0	0	0	0.440168
2	Denmark	80	53.34	60.1857	0	0	0	0.348491	0	0	0	0.627901
2	Denmark	80	53.34	60.9003	0	0	0	0.330088	0	0	0	0.631754
2	Denmark	80	53.34	152.954	0	0	0	0.411417	0	0	0	0.689958
2	Denmark	80	53.34	45.2074	0	0	0	0.28452	0	0	0	0.44954
2	Denmark	80	53.34	156.732	0	0	0	0.413038	0	0	0	0.692661
2	Denmark	80	53.34	45.5842	0	0	0	0.289714	0	0	0	0.448052
2	Denmark	80	53.34	78.3431	0	0	0	1.95511	0	0	0	3.7426
2	Denmark	111.8	74.58	223.324	0	0	0	0.188469	0	0	0	0.524843
2	Denmark	80	53.34	59.7599	0	0	0	0.292488	0	0	0	0.439658
2	Denmark	110.1	73.38	222.736	0	0	0	0.167357	0	0	0	0.438049
2	Faroe Islands	0	0	0	0	0	0	0	0	0	0	0
2	Faroe Islands	0	0	0	0	0	0	0	0	0	0	0
2	Faroe Islands	0	0	0	0	0	0	0	0	0	0	0
2	Faroe Islands	0	0	0	0	0	0	0	0	0	0	0
2	Faroe Islands	0	0	0	0	0	0	0	0	0	0	0
2	Faroe Islands	0	0	0	0	0	0	0	0	0	0	0
2	Faroe Islands	0	0	0	0	0	0	0	0	0	0	0
2	Faroe Islands	0	0	0	0	0	0	0	0	0	0	0
2	Faroe Islands	0	0	0	0	0	0	0	0	0	0	0
2	Faroe Islands	0	0	0	0	0	0	0	0	0	0	0
2	Faroe Islands	0	0	0	0	0	0	0	0	0	0	0
2	Faroe Islands	0	0	0	0	0	0	0	0	0	0	0
2	Faroe Islands	0	0	0	0	0	0	0	0	0	0	0
2	Faroe Islands	0	0	0	0	0	0	0	0	0	0	0
2	Faroe Islands	0	0	0	0	0	0	0	0	0	0	0
2	Faroe Islands	0	0	0	0	0	0	0	0	0	0	0
2	Faroe Islands	0	0	0	0	0	0	0	0	0	0	0
2	Faroe Islands	0	0	0	0	0	0	0	0	0	0	0
2	Faroe Islands	0	0	0	0	0	0	0	0	0	0	0
2	Faroe Islands	0	0	0	0	0	0	0	0	0	0	0
2	Faroe Islands	0	0	0	0	0	0	0	0	0	0	0
2	Faroe Islands	0	0	0	0	0	0	0	0	0	0	0
2	Faroe Islands	0	0	0	0	0	0	0	0	0	0	0
2	Faroe Islands	0	0	0	0	0	0	0	0	0	0	0
2	Faroe Islands	0	0	0	0	0	0	0	0	0	0	0
2	Faroe Islands	50.6	33.72	21.6789	0	0	0	57.4896	0	0	0	2.25097
2	Faroe Islands	0	0	0	0	0	0	0	0	0	0	0
2	Faroe Islands	0	0	0	0	0	0	0	0	0	0	0
2	Faroe Islands	0	0	0	0	0	0	0	0	0	0	0
2	Faroe Islands	0	0	0	0	0	0	0	0	0	0	0
2	Faroe Islands	0	0	0	0	0	0	0	0	0	0	0
2	Faroe Islands	0	0	0	0	0	0	0	0	0	0	0
2	Faroe Islands	0	0	0	0	0	0	0	0	0	0	0
2	Faroe Islands	0	0	0	0	0	0	0	0	0	0	0
2	Faroe Islands	0	0	0	0	0	0	0	0	0	0	0
2	Faroe Islands	0	0	0	0	0	0	0	0	0	0	0
2	Faroe Islands	0	0	0	0	0	0	0	0	0	0	0
2	Faroe Islands	0	0	0	0	0	0	0	0	0	0	0
2	Faroe Islands	0	0	0	0	0	0	0	0	0	0	0
2	Faroe Islands	144.8	96.54	37.3578	0	0	0	0.396627	0	0	0	0.188141
2	Faroe Islands	162.2	108.12	37.9395	0	0	0	0.24206	0	0	0	0.114943
2	Faroe Islands	125.9	83.94	36.2764	0	0	0	0.78155	0	0	0	0.370013
2	Faroe Islands	124.4	82.98	43.0135	0	0	0	0.746194	0	0	0	0.348746
2	Faroe Islands	118.1	78.72	40.5677	0	0	0	1.43021	0	0	0	0.669925
2	Faroe Islands	201.2	134.16	114.304	0	0	0	0.872232	0	0	0	0.407768
2	Faroe Islands	110.8	73.86	41.4528	0	0	0	1.95728	0	0	0	0.905121
2	Faroe Islands	113.2	75.48	45.1934	0	0	0	1.57222	0	0	0	0.726311
2	Faroe Islands	112.8	75.18	41.2305	0	0	0	2.19699	0	0	0	1.0156
2	Faroe Islands	106.6	71.1	41.2285	0	0	0	2.18287	0	0	0	1.00928
2	Faroe Islands	229	152.7	137.609	0	0	0	1.12347	0	0	0	0.607777
2	Faroe Islands	225.4	150.24	132.675	0	0	0	1.24425	0	0	0	0.667323
2	Faroe Islands	227.6	151.74	155.262	0	0	0	1.44967	0	0	0	0.779072
2	Faroe Islands	103.7	69.18	44.3506	0	0	0	2.74182	0	0	0	1.25412
2	Faroe Islands	189.4	126.3	136.697	0	0	0	2.18555	0	0	0	0.998066
2	Faroe Islands	101.2	67.44	45.4387	0	0	0	2.85561	0	0	0	1.30912
2	Faroe Islands	99.4	66.24	49.1645	0	0	0	2.97606	0	0	0	1.36929
2	Faroe Islands	85	56.64	32.1715	0	0	0	1.81899	0	0	0	0.820017
2	Faroe Islands	85	56.64	32.5234	0	0	0	1.94191	0	0	0	0.877688
2	Faroe Islands	99.5	66.3	56.2393	0	0	0	2.60995	0	0	0	1.16426
2	Faroe Islands	80	53.34	36.3264	0	0	0	3.28624	0	0	0	1.51787
2	Faroe Islands	75	49.98	36.5744	0	0	0	3.25561	0	0	0	1.48719
2	Faroe Islands	75	49.98	30.2045	0	0	0	2.17224	0	0	0	1.00053
2	Faroe Islands	80	53.34	41.5619	0	0	0	3.11885	0	0	0	1.43207
2	Faroe Islands	80	53.34	40.0115	0	0	0	3.04384	0	0	0	1.3996
2	Faroe Islands	75	49.98	29.845	0	0	0	2.44824	0	0	0	1.12289
2	Faroe Islands	75	49.98	29.048	0	0	0	2.38746	0	0	0	1.08632
2	Faroe Islands	80	53.34	32.0849	0	0	0	1.98939	0	0	0	0.906937
2	Faroe Islands	75	49.98	31.627	0	0	0	2.86274	0	0	0	1.30626
2	Faroe Islands	67.4	44.94	30.9007	0	0	0	2.84065	0	0	0	1.29653
2	Faroe Islands	75	49.98	31.5328	0	0	0	2.28579	0	0	0	1.03598
2	Faroe Islands	80	53.34	55.8239	0	0	0	1.72579	0	0	0	0.802114
2	Faroe Islands	80	53.34	49.0173	0	0	0	2.05635	0	0	0	0.944902
2	Faroe Islands	75	49.98	35.9172	0	0	0	2.55956	0	0	0	1.15748
2	Faroe Islands	80	53.34	53.6223	0	0	0	1.702	0	0	0	0.780366
2	Faroe Islands	75	49.98	35.6819	0	0	0	2.30854	0	0	0	1.0467
2	Faroe Islands	75	49.98	34.8301	0	0	0	2.29369	0	0	0	1.04022
2	Faroe Islands	80	53.34	57.5583	0	0	0	1.39172	0	0	0	0.640917
2	Faroe Islands	80	53.34	56.9212	0	0	0	2.03956	0	0	0	0.937871
2	Faroe Islands	80	53.34	59.1901	0	0	0	1.64196	0	0	0	0.749864
2	Faroe Islands	80	53.34	61.194	0	0	0	1.36164	0	0	0	0.630533
2	Faroe Islands	80	53.34	42.6062	0	0	0	1.22222	0	0	0	0.568793
2	Faroe Islands	80	53.34	58.0203	0	0	0	1.82081	0	0	0	0.842442
2	Faroe Islands	80	53.34	60.9408	0	0	0	1.82315	0	0	0	0.843484
2	Faroe Islands	80	53.34	63.7196	0	0	0	1.73022	0	0	0	0.793342
2	Faroe Islands	80	53.34	63.5829	0	0	0	1.38445	0	0	0	0.637853
2	Faroe Islands	80	53.34	59.2171	0	0	0	1.71914	0	0	0	0.78839
2	Faroe Islands	80	53.34	49.474	0	0	0	0.996486	0	0	0	0.481654
2	Faroe Islands	80	53.34	52.0786	0	0	0	0.896998	0	0	0	0.424927
2	Faroe Islands	80	53.34	68.2689	0	0	0	1.45616	0	0	0	0.670273
2	Faroe Islands	80	53.34	57.7802	0	0	0	0.92612	0	0	0	0.437558
2	Faroe Islands	80	53.34	53.2592	0	0	0	0.903004	0	0	0	0.426545
2	Faroe Islands	80	53.34	50.9124	0	0	0	1.28051	0	0	0	0.59244
2	Faroe Islands	80	53.34	65.9302	0	0	0	1.07062	0	0	0	0.534378
2	Faroe Islands	131.5	87.66	198.2	0	0	0	0.700182	0	0	0	0.321667
2	Faroe Islands	122.9	81.96	220.594	0	0	0	0.871558	0	0	0	0.40604
2	Faroe Islands	128.8	85.92	207.343	0	0	0	0.686376	0	0	0	0.319081
2	Faroe Islands	131.5	87.66	228.508	0	0	0	0.590709	0	0	0	0.276673
2	Faroe Islands	119.8	79.86	224.106	0	0	0	0.869958	0	0	0	0.405434
2	Faroe Islands	126.5	84.36	218.545	0	0	0	0.662188	0	0	0	0.307524
2	Faroe Islands	128.6	85.74	255.744	0	0	0	0.522333	0	0	0	0.245218
2	Faroe Islands	128.4	85.56	269.712	0	0	0	0.533414	0	0	0	0.250369
2	Faroe Islands	0	0	0	0	0	0	0	0	0	0	0
2	Greenland	70.6	43.86	18.1823	0	0	0	1.89986	0	0	0	1.4321
2	Greenland	0	0	0	0	0	0	0	0	0	0	0
2	Greenland	71.4	44.34	18.0703	0	0	0	2.26862	0	0	0	1.70971
2	Greenland	75	46.56	23.3427	0	0	0	1.87763	0	0	0	1.30728
2	Greenland	60.5	37.56	17.3246	0	0	0	0.67956	0	0	0	0.495622
2	Greenland	0	0	0	0	0	0	0	0	0	0	0
2	Greenland	0	0	0	0	0	0	0	0	0	0	0
2	Greenland	0	0	0	0	0	0	0	0	0	0	0
2	Greenland	139.4	86.52	19.4917	0	0	0	1.43976	0	0	0	0.823878
2	Greenland	0	0	0	0	0	0	0	0	0	0	0
2	Greenland	214	132.84	23.2222	0	0	0	1.14777	0	0	0	0.595674
2	Greenland	70.6	43.86	18.1823	0	0	0	1.89986	0	0	0	1.4321
2	Greenland	0	0	0	0	0	0	0	0	0	0	0
2	Greenland	71.4	44.34	18.0703	0	0	0	2.26862	0	0	0	1.70971
2	Greenland	0	0	0	0	0	0	0	0	0	0	0
2	Greenland	95.2	53.16	44.6258	0	0	0	1.24553	0	0	0	0.923445
2	Greenland	103	47.28	48.2063	0	0	0	1.23277	0	0	0	0.899026
2	Greenland	0	0	0	0	0	0	0	0	0	0	0
2	Greenland	0	0	0	0	0	0	0	0	0	0	0
2	Greenland	0	0	0	0	0	0	0	0	0	0	0
2	Greenland	222.5	138.12	25.0125	0	0	0	1.38547	0	0	0	0.801419
2	Greenland	139.4	86.52	19.4917	0	0	0	2.15964	0	0	0	1.23582
2	Greenland	0	0	0	0	0	0	0	0	0	0	0
2	Greenland	0	0	0	0	0	0	0	0	0	0	0
2	Greenland	0	0	0	0	0	0	0	0	0	0	0
2	Greenland	0	0	0	0	0	0	0	0	0	0	0
2	Greenland	0	0	0	0	0	0	0	0	0	0	0
2	Greenland	0	0	0	0	0	0	0	0	0	0	0
2	Greenland	0	0	0	0	0	0	0	0	0	0	0
2	Greenland	0	0	0	0	0	0	0	0	0	0	0
2	Greenland	0	0	0	0	0	0	0	0	0	0	0
2	Greenland	0	0	0	0	0	0	0	0	0	0	0
2	Greenland	0	0	0	0	0	0	0	0	0	0	0
2	Greenland	0	0	0	0	0	0	0	0	0	0	0
2	Greenland	0	0	0	0	0	0	0	0	0	0	0
2	Greenland	0	0	0	0	0	0	0	0	0	0	0
2	Greenland	0	0	0	0	0	0	0	0	0	0	0
2	Greenland	0	0	0	0	0	0	0	0	0	0	0
2	Greenland	0	0	0	0	0	0	0	0	0	0	0
2	Greenland	0	0	0	0	0	0	0	0	0	0	0
2	Greenland	0	0	0	0	0	0	0	0	0	0	0
2	Greenland	0	0	0	0	0	0	0	0	0	0	0
2	Greenland	0	0	0	0	0	0	0	0	0	0	0
2	Greenland	0	0	0	0	0	0	0	0	0	0	0
2	Greenland	0	0	0	0	0	0	0	0	0	0	0
2	Greenland	70.6	43.86	18.1823	0	0	0	0.678523	0	0	0	0.511463
2	Greenland	75	46.56	23.3427	0	0	0	0.268232	0	0	0	0.186754
2	Greenland	139.4	86.52	19.4917	0	0	0	0.5142	0	0	0	0.294242
2	Greenland	95.2	53.16	44.6258	0	0	0	0.177933	0	0	0	0.131921
2	Greenland	103	47.28	48.2063	0	0	0	0.17611	0	0	0	0.128432
2	Greenland	65.5	40.68	11.908	0	0	0	0.0532449	0	0	0	0.0445999
2	Greenland	60.5	37.56	17.3246	0	0	0	0.09708	0	0	0	0.0708031
2	Greenland	222.5	138.12	25.0125	0	0	0	0.197924	0	0	0	0.114488
2	Greenland	214	132.84	23.2222	0	0	0	0.234239	0	0	0	0.121566
2	Greenland	71.4	44.34	18.0703	0	0	0	0.648177	0	0	0	0.48849
2	Greenland	70.6	43.86	18.1823	0	0	0	0.949932	0	0	0	0.716048
2	Greenland	214	132.84	23.2222	0	0	0	0.491902	0	0	0	0.255289
2	Greenland	75	46.56	18.1362	0	0	0	0.733297	0	0	0	0.621613
2	Greenland	75	46.56	18.1427	0	0	0	0.731311	0	0	0	0.61918
2	Greenland	65.5	40.68	11.908	0	0	0	0.798673	0	0	0	0.668998
2	Greenland	0	0	0	0	0	0	0	0	0	0	0
2	Greenland	0	0	0	0	0	0	0	0	0	0	0
2	Greenland	0	0	0	0	0	0	0	0	0	0	0
2	Greenland	0	0	0	0	0	0	0	0	0	0	0
2	Greenland	0	0	0	0	0	0	0	0	0	0	0
2	Greenland	0	0	0	0	0	0	0	0	0	0	0
2	Greenland	0	0	0	0	0	0	0	0	0	0	0
2	Greenland	0	0	0	0	0	0	0	0	0	0	0
2	Greenland	0	0	0	0	0	0	0	0	0	0	0
2	Greenland	0	0	0	0	0	0	0	0	0	0	0
2	Greenland	0	0	0	0	0	0	0	0	0	0	0
2	Greenland	0	0	0	0	0	0	0	0	0	0	0
2	Greenland	0	0	0	0	0	0	0	0	0	0	0
2	Greenland	0	0	0	0	0	0	0	0	0	0	0
2	Greenland	0	0	0	0	0	0	0	0	0	0	0
2	Greenland	0	0	0	0	0	0	0	0	0	0	0
2	Greenland	0	0	0	0	0	0	0	0	0	0	0
2	Greenland	0	0	0	0	0	0	0	0	0	0	0
2	Greenland	0	0	0	0	0	0	0	0	0	0	0
2	Greenland	0	0	0	0	0	0	0	0	0	0	0
2	Greenland	0	0	0	0	0	0	0	0	0	0	0
2	Greenland	0	0	0	0	0	0	0	0	0	0	0
2	Greenland	0	0	0	0	0	0	0	0	0	0	0
2	Greenland	0	0	0	0	0	0	0	0	0	0	0
2	Greenland	0	0	0	0	0	0	0	0	0	0	0
2	Greenland	0	0	0	0	0	0	0	0	0	0	0
2	Greenland	0	0	0	0	0	0	0	0	0	0	0
2	Greenland	0	0	0	0	0	0	0	0	0	0	0
2	Greenland	0	0	0	0	0	0	0	0	0	0	0
2	Greenland	0	0	0	0	0	0	0	0	0	0	0
2	Greenland	0	0	0	0	0	0	0	0	0	0	0
2	Greenland	0	0	0	0	0	0	0	0	0	0	0
2	Greenland	0	0	0	0	0	0	0	0	0	0	0
2	Greenland	0	0	0	0	0	0	0	0	0	0	0
2	Greenland	0	0	0	0	0	0	0	0	0	0	0
2	Greenland	0	0	0	0	0	0	0	0	0	0	0
2	Greenland	0	0	0	0	0	0	0	0	0	0	0
2	Greenland	0	0	0	0	0	0	0	0	0	0	0
2	Greenland	0	0	0	0	0	0	0	0	0	0	0
2	Greenland	0	0	0	0	0	0	0	0	0	0	0
2	Greenland	0	0	0	0	0	0	0	0	0	0	0
2	Greenland	0	0	0	0	0	0	0	0	0	0	0
2	Greenland	100	62.1	19.2332	0	0	0	0.279284	0	0	0	0.136202
2	Greenland	111.5	69.24	25.0225	0	0	0	0.209362	0	0	0	0.425319
2	Greenland	144.4	89.64	74.6795	0	0	0	0.417255	0	0	0	0.758062
2	Greenland	185.6	115.2	96.4899	0	0	0	0.136975	0	0	0	0.232643
2	Greenland	250	155.16	318.291	0	0	0	23.4423	0	0	0	10.9994
2	Greenland	116.8	72.48	66.1895	0	0	0	3.85315	0	0	0	1.79489
2	Greenland	66.4	41.22	31.7399	0	0	0	7.04602	0	0	0	3.34033
2	Greenland	250	155.16	220.069	0	0	0	34.7842	0	0	0	16.7611
2	Greenland	153.7	95.4	85.7943	0	0	0	2.22867	0	0	0	4.23974
2	Greenland	151.6	94.08	118.365	0	0	0	16.1288	0	0	0	7.66472
2	Greenland	91.3	56.7	24.3009	0	0	0	0.596647	0	0	0	1.21215
2	Greenland	85	52.74	45.2494	0	0	0	0.514852	0	0	0	0.953105
2	Greenland	250	155.16	329.795	0	0	0	10.5469	0	0	0	4.97164
2	Greenland	140.2	87.06	90.2765	0	0	0	2.71139	0	0	0	1.2008
2	Greenland	140.5	87.18	65.7472	0	0	0	3.6539	0	0	0	1.8523
2	Greenland	250	155.16	319.647	0	0	0	43.0528	0	0	0	20.1157
2	Greenland	87.9	54.6	24.2172	0	0	0	0.762608	0	0	0	1.54849
2	Greenland	148.7	92.34	86.7616	0	0	0	2.47516	0	0	0	4.67283
2	Greenland	151.9	94.26	85.0053	0	0	0	4.00089	0	0	0	7.59711
2	Greenland	65	40.38	36.9613	0	0	0	9.13719	0	0	0	4.31806
2	Greenland	140.6	87.24	76.1761	0	0	0	1.67888	0	0	0	3.17497
2	Greenland	56.4	34.98	7.0867	0	0	0	59.3381	0	0	0	27.1229
2	Greenland	149.4	92.7	85.6642	0	0	0	3.89843	0	0	0	7.38277
2	Greenland	64.1	39.78	35.1772	0	0	0	10.4716	0	0	0	4.92703
2	Greenland	65.1	40.44	18.122	0	0	0	1.39229	0	0	0	0.696097
2	Greenland	153.4	95.22	97.4006	0	0	0	0.620208	0	0	0	1.15254
2	Greenland	110.5	68.58	69.0853	0	0	0	16.1665	0	0	0	7.56811
2	Greenland	250	155.16	319.922	0	0	0	65.8138	0	0	0	30.5286
2	Greenland	110.2	68.4	65.5072	0	0	0	10.8553	0	0	0	5.00181
2	Greenland	62.8	39	37.49	0	0	0	19.841	0	0	0	9.35298
2	Greenland	124.8	77.46	59.6955	0	0	0	1.33283	0	0	0	2.36207
2	Greenland	147.1	91.26	87.2621	0	0	0	3.17631	0	0	0	6.003
2	Greenland	62.6	38.82	37.7573	0	0	0	34.333	0	0	0	16.2066
2	Greenland	54.3	33.72	6.92775	0	0	0	60.6008	0	0	0	27.5401
2	Greenland	145.9	90.54	87.7913	0	0	0	2.98872	0	0	0	5.62904
2	Greenland	147.8	91.74	85.2104	0	0	0	4.84534	0	0	0	9.17788
2	Greenland	62.1	38.52	36.6882	0	0	0	23.2299	0	0	0	10.8773
2	Greenland	85	52.74	30.5793	0	0	0	1.0443	0	0	0	2.23391
2	Greenland	82	50.94	46.9	0	0	0	0.914153	0	0	0	1.75808
2	Greenland	135.2	83.88	112.879	0	0	0	5.98718	0	0	0	2.70012
2	Greenland	133.4	82.8	65.4479	0	0	0	4.97471	0	0	0	2.51499
2	Greenland	54.8	34.02	7.07101	0	0	0	59.4242	0	0	0	27.0068
2	Greenland	147.2	91.38	86.2057	0	0	0	3.87941	0	0	0	7.31326
2	Greenland	63.4	39.36	40.1726	0	0	0	10.3989	0	0	0	4.88149
2	Greenland	133.7	82.98	75.7573	0	0	0	2.0393	0	0	0	3.56683
2	Greenland	138	85.68	106.614	0	0	0	18.3427	0	0	0	8.55849
2	Greenland	109.8	68.1	66.4604	0	0	0	9.12791	0	0	0	4.19465
2	Greenland	32.9	20.4	4.23585	0	0	0	37.2182	0	0	0	16.3447
2	Greenland	61.5	38.16	18.5451	0	0	0	1.30347	0	0	0	0.650576
2	Greenland	148.7	92.28	98.0403	0	0	0	0.61349	0	0	0	1.0703
2	Greenland	136.1	84.48	75.8329	0	0	0	1.85285	0	0	0	3.13672
2	Greenland	83	51.48	47.8027	0	0	0	0.752162	0	0	0	1.47095
2	Greenland	70.3	43.62	50.3982	0	0	0	6.9695	0	0	0	3.22545
2	Greenland	250	155.16	282.017	0	0	0	50.6215	0	0	0	24.1428
2	Greenland	152.6	94.68	115.897	0	0	0	2.39785	0	0	0	4.43662
2	Greenland	145.8	90.54	86.6376	0	0	0	3.81097	0	0	0	7.18653
2	Greenland	63.6	39.48	43.7247	0	0	0	8.68149	0	0	0	4.05501
2	Greenland	85	52.74	33.6231	0	0	0	0.883237	0	0	0	1.76355
2	Greenland	108	67.02	87.4149	0	0	0	13.4736	0	0	0	6.26356
2	Greenland	250	155.16	452.088	0	0	0	46.2392	0	0	0	21.3573
2	Greenland	250	155.16	282.368	0	0	0	47.6447	0	0	0	22.6781
2	Greenland	63.5	39.42	43.8271	0	0	0	8.19346	0	0	0	3.8295
2	Greenland	250	155.16	324.382	0	0	0	46.6709	0	0	0	22.2479
2	Greenland	155.9	96.72	123.33	0	0	0	2.78424	0	0	0	5.39703
2	Greenland	33.1	20.58	23.6178	0	0	0	29.3065	0	0	0	14.0423
2	Greenland	69.1	42.9	27.6433	0	0	0	1.00296	0	0	0	0.511964
2	Greenland	241.7	150.06	272.532	0	0	0	0.461967	0	0	0	0.831315
2	Greenland	30.8	19.14	5.06778	0	0	0	43.9592	0	0	0	19.398
2	Greenland	80	49.68	36.0805	0	0	0	0.731466	0	0	0	1.47017
2	Greenland	137.7	85.5	100.154	0	0	0	1.60017	0	0	0	2.50837
2	Greenland	134.2	83.28	103.547	0	0	0	3.26798	0	0	0	1.66184
2	Greenland	115.9	71.94	103.364	0	0	0	6.35654	0	0	0	2.88699
2	Greenland	64.1	39.84	48.2179	0	0	0	6.72728	0	0	0	3.20345
2	Greenland	137.2	85.2	109.38	0	0	0	1.52021	0	0	0	2.38964
2	Greenland	85	52.74	73.3131	0	0	0	0.56492	0	0	0	1.0886
2	Greenland	137	85.02	129.571	0	0	0	12.0822	0	0	0	5.60902
2	Greenland	108.2	67.14	90.848	0	0	0	10.5881	0	0	0	4.90657
2	Greenland	250	155.16	331.824	0	0	0	38.9986	0	0	0	18.5092
2	Greenland	149.7	92.94	133.826	0	0	0	1.8695	0	0	0	3.26784
2	Greenland	149.9	93.06	124.15	0	0	0	2.8211	0	0	0	5.31207
2	Greenland	75	46.56	30.8596	0	0	0	0.857596	0	0	0	0.426931
2	Greenland	250	155.16	489.882	0	0	0	34.1927	0	0	0	15.6106
2	Greenland	250	155.16	340.617	0	0	0	36.7034	0	0	0	17.3848
2	Greenland	33.3	20.7	25.2694	0	0	0	28.9184	0	0	0	13.8669
2	Greenland	245.4	152.28	298.982	0	0	0	0.363821	0	0	0	0.652672
2	Greenland	123.8	76.86	139.573	0	0	0	0.501737	0	0	0	0.962887
2	Greenland	80	49.68	82.6395	0	0	0	7.63696	0	0	0	3.46407
2	Greenland	250	155.16	358.925	0	0	0	33.2215	0	0	0	15.7308
2	Greenland	135.4	84.06	128.036	0	0	0	10.0784	0	0	0	4.64764
2	Greenland	80	49.68	82.4313	0	0	0	7.54739	0	0	0	3.36512
2	Greenland	250	155.16	338.212	0	0	0	31.3413	0	0	0	14.829
2	Greenland	151.4	93.96	134.711	0	0	0	2.05741	0	0	0	3.76498
2	Greenland	150.1	93.12	152.493	0	0	0	2.35742	0	0	0	4.42771
2	Greenland	62.9	39.06	28.1425	0	0	0	2.41931	0	0	0	1.22402
2	Greenland	250	155.16	347.245	0	0	0	29.4965	0	0	0	13.929
2	Greenland	147	91.2	133.807	0	0	0	1.51067	0	0	0	2.57949
2	Greenland	115.9	71.88	105.097	0	0	0	4.72196	0	0	0	2.14993
2	Greenland	80	49.68	41.3419	0	0	0	0.509345	0	0	0	1.02277
2	Greenland	143.4	88.98	121.136	0	0	0	1.01168	0	0	0	1.75083
2	Greenland	250	155.16	390.087	0	0	0	30.9969	0	0	0	14.6565
2	Greenland	32.5	20.16	29.79	0	0	0	43.0288	0	0	0	20.5906
2	Greenland	61.9	38.4	59.3436	0	0	0	5.29908	0	0	0	2.37994
2	Greenland	65.9	40.92	34.3117	0	0	0	0.692438	0	0	0	0.338146
2	Greenland	106.2	65.94	113.005	0	0	0	7.90649	0	0	0	3.64154
2	Greenland	150.3	93.3	144.027	0	0	0	1.59973	0	0	0	2.69403
2	Greenland	32.7	20.28	27.4793	0	0	0	40.5283	0	0	0	19.3485
2	Greenland	33.1	20.58	29.8105	0	0	0	25.4962	0	0	0	12.0151
2	Greenland	80	49.68	45.3107	0	0	0	0.535159	0	0	0	1.07451
2	Greenland	146.7	91.08	132.94	0	0	0	1.06737	0	0	0	1.80608
2	Greenland	242.2	150.3	322.782	0	0	0	0.317652	0	0	0	0.571637
2	Greenland	135.3	84	146.736	0	0	0	9.33435	0	0	0	4.33579
2	Greenland	250	155.16	399.967	0	0	0	33.2395	0	0	0	15.6736
2	Greenland	113.2	70.26	151.435	0	0	0	0.456236	0	0	0	0.873335
2	Greenland	129.7	80.52	124.051	0	0	0	31.8178	0	0	0	14.3957
2	Greenland	136.6	84.78	146.816	0	0	0	2.24461	0	0	0	3.93746
2	Greenland	120.1	74.58	119.881	0	0	0	0.486955	0	0	0	1.13543
2	Greenland	135.3	84	137.255	0	0	0	1.14001	0	0	0	1.90753
2	Greenland	85	52.74	116.529	0	0	0	5.91373	0	0	0	2.62398
2	Greenland	112.8	70.02	113.99	0	0	0	34.757	0	0	0	16.298
2	Greenland	107.9	67.02	117.668	0	0	0	33.4271	0	0	0	15.7047
2	Greenland	112.5	69.84	120.871	0	0	0	35.3992	0	0	0	16.6093
2	Greenland	63.5	39.42	68.7478	0	0	0	5.83045	0	0	0	2.69337
2	Greenland	142.5	88.44	183.773	0	0	0	1.62017	0	0	0	2.96005
2	Greenland	135.5	84.06	169.861	0	0	0	2.40447	0	0	0	4.13548
2	Greenland	133.5	82.92	171.973	0	0	0	10.434	0	0	0	4.77477
2	Greenland	28.9	17.94	13.4721	0	0	0	2.85364	0	0	0	1.44415
2	Greenland	106	65.82	139.274	0	0	0	5.54515	0	0	0	2.47525
2	Greenland	34.1	21.18	36.4988	0	0	0	17.8095	0	0	0	8.36166
2	Greenland	130.1	80.7	159.625	0	0	0	1.18912	0	0	0	2.06842
2	Greenland	60	37.26	51.7182	0	0	0	0.488685	0	0	0	0.942567
2	Greenland	105.1	65.22	139.577	0	0	0	9.25619	0	0	0	4.22055
2	Greenland	128.1	79.56	140.834	0	0	0	34.1261	0	0	0	15.3025
2	Greenland	106.2	65.94	137.353	0	0	0	35.0473	0	0	0	16.3818
2	Greenland	80	49.68	69.4988	0	0	0	0.540177	0	0	0	1.21394
2	Greenland	85	52.74	105.3	0	0	0	0.37304	0	0	0	0.641146
2	Greenland	132.8	82.44	167.542	0	0	0	10.6331	0	0	0	4.87556
2	Greenland	30.9	19.2	14.0524	0	0	0	2.88426	0	0	0	1.45634
2	Greenland	110.6	68.64	140.794	0	0	0	36.5898	0	0	0	17.1084
2	Greenland	142.1	88.2	183.415	0	0	0	1.66332	0	0	0	3.04963
2	Greenland	49.3	30.6	83.0308	0	0	0	25.0114	0	0	0	11.7767
2	Greenland	34.1	21.12	34.6218	0	0	0	15.8036	0	0	0	7.39204
2	Greenland	131.4	81.54	163.61	0	0	0	1.19846	0	0	0	2.0542
2	Greenland	80	49.68	92.337	0	0	0	4.1185	0	0	0	1.8004
2	Greenland	34.1	21.18	15.7985	0	0	0	2.5848	0	0	0	1.4575
2	Greenland	80	49.68	93.4102	0	0	0	2.27196	0	0	0	4.28814
2	Greenland	38.4	23.88	45.8589	0	0	0	6.05151	0	0	0	2.84587
2	Greenland	75	46.56	75.3197	0	0	0	5.44596	0	0	0	2.56604
2	Greenland	36.4	22.56	41.3352	0	0	0	13.2428	0	0	0	6.16672
2	Greenland	104.1	64.56	128.82	0	0	0	0.38411	0	0	0	0.664669
2	Greenland	80	49.68	127.021	0	0	0	1.70179	0	0	0	3.08324
2	Greenland	75	46.56	78.7757	0	0	0	9.3002	0	0	0	4.31424
2	Greenland	50.7	31.44	59.4376	0	0	0	34.104	0	0	0	16.0354
2	Greenland	34.2	21.24	43.6532	0	0	0	18.5752	0	0	0	8.70634
2	Greenland	75	46.56	50.5617	0	0	0	0.590904	0	0	0	1.20341
2	Greenland	101.9	63.24	174.994	0	0	0	3.05384	0	0	0	1.36
2	Greenland	31.3	19.44	19.8234	0	0	0	2.82159	0	0	0	1.42774
2	Greenland	80	49.68	121.293	0	0	0	2.21439	0	0	0	4.1803
2	Greenland	41.1	25.5	53.3512	0	0	0	5.93738	0	0	0	2.76101
2	Greenland	80	49.68	118.201	0	0	0	1.17742	0	0	0	2.10351
2	Greenland	42	26.04	54.5059	0	0	0	5.88473	0	0	0	2.74376
2	Greenland	80	49.68	81.4344	0	0	0	5.50068	0	0	0	2.43686
2	Greenland	40.1	24.84	57.9952	0	0	0	9.85819	0	0	0	4.54214
2	Greenland	80	49.68	87.1345	0	0	0	0.575877	0	0	0	1.17798
2	Greenland	80	49.68	71.2903	0	0	0	32.8094	0	0	0	15.1495
2	Greenland	80	49.68	99.3948	0	0	0	8.91561	0	0	0	4.09151
2	Greenland	75	46.56	38.4433	0	0	0	2.58085	0	0	0	1.37527
2	Greenland	80	49.68	183.244	0	0	0	2.20694	0	0	0	4.01346
2	Greenland	80	49.68	101.188	0	0	0	8.71123	0	0	0	4.00518
2	Greenland	80	49.68	155.669	0	0	0	1.9853	0	0	0	0.895979
2	Greenland	133.6	82.92	347.934	0	0	0	7.22395	0	0	0	3.76401
2	Greenland	80	49.68	156.214	0	0	0	1.75301	0	0	0	0.779099
3	Germany	46.3	30.9	0.207211	0.01135	0.0967603	0.129271	0.132548	0.01714	0.083691	0.101924	0.103115
3	Germany	138.1	92.1	0.000494049	0	0	0	0.128874	0	0	0	1.18476
3	Germany	0	0	0.756551	0	0	0	0	0	0	0	0
3	Germany	20.9	13.92	26.0806	0.0426688	0.261775	0.504896	0.572635	0	0	0	0
3	Germany	21.1	14.04	26.0755	0.0410687	0.263746	0.508697	0.576946	0	0	0	0
3	Germany	54.4	36.3	1.85703	0.0875377	0.162415	0.261015	0.278973	0.00526693	0.157407	0.218602	0.225739
3	Germany	0	0	0.828128	0	0	0	0	0	0	0	0
3	Germany	0	0	7.92843	0	0	0	0	0	0	0	0
3	Germany	0	0	0.827463	0.00033855	0.0006697	0.0006771	0.0006771	0	0	0	0
3	Germany	0	0	0.593696	0	0	0	0	0	0	0	0
3	Germany	119	79.38	40.5358	0	0	0	0.175611	0	0	0	0.0758939
3	Germany	70.8	47.22	15.4488	0	0	0	0.111226	0	0	0	0.151136
3	Germany	39.3	26.16	0.248382	0	0	0	0	0.101899	0.687201	0.845176	0.85607
3	Germany	69.9	46.56	0.51892	0	0	0	0	0.16656	0.630808	0.879402	0.908792
3	Germany	29.2	19.44	0.76272	0	0	0	0	0.013785	0.0880425	0.111697	0.113603
3	Germany	33.7	20.88	19.0567	0	0	0	0	0.024051	0.124053	0.208363	0.225553
3	Germany	38.4	25.62	0.205246	0.0886	1.01032	1.59877	1.70159	0.02084	0.753421	1.04555	1.07953
3	Germany	0	0	2.68812	0	0	0	0	0	0	0	0
3	Germany	0	0	5.88408	0	0	0	0	0	0	0	0
3	Germany	48.7	32.46	0.26542	0.127287	0.984842	1.31456	1.34768	0.00993755	0.022653	0.0293105	0.0298975
3	Germany	250	166.68	0.891271	0.000363124	0.00773421	0.00847759	0.00849914	0.000309236	0.000616261	0.000654673	0.000655502
3	Germany	23.8	15.9	0.309077	0.011054	0.147303	0.232675	0.247518	0.00281076	0.0963315	0.13278	0.136918
3	Germany	66.7	41.4	4.62465	0	0	0	0.071432	0	0	0	0.674625
3	Germany	0	0	3.70896	0	0	0	0	0	0	0	0
3	Germany	51.2	34.14	1.1008	0	0	0	0	0.404295	0.922102	1.20067	1.22592
3	Germany	43.8	29.16	0.206091	0	0	0	0	0.14805	1.97477	2.74091	2.83008
3	Germany	64.9	43.26	0.170658	0	0	0	0	0.020245	0.695199	0.964753	0.996107
3	Germany	69.1	46.08	1.19887	0	0	0	0	0.453214	2.77772	3.17991	3.19737
3	Germany	48.1	32.04	0.194435	0	0	0	0	0.159265	1.47791	2.05198	2.11887
3	Germany	155.4	103.62	0	0	0	0	0.119351	0	0	0	1.08986
3	Germany	152.8	101.88	0.00185525	0	0	0	0.104359	0	0	0	0.954178
3	Germany	122.7	81.84	0.235122	0	0	0	0	0.272554	0.448617	0.578933	0.590289
3	Germany	141.4	94.26	0.00118299	0	0	0	0.0744735	0	0	0	0.682954
3	Germany	23.6	15.72	0.420909	0.000183	0.0002465	0.0003525	0.000366	0.213945	1.65912	2.18904	2.23981
3	Germany	44	29.34	0.6532	0	0	0	0	0.037255	1.2409	1.72347	1.77977
3	Germany	0	0	0.785875	0	0	0	0	0	0	0	0
3	Germany	0	0	0.43056	0	0	0	0	0	0	0	0
3	Germany	42.9	28.56	0.152814	0	0	0	0	0.06018	2.1751	3.01914	3.1174
3	Germany	37.3	24.9	2.33832	0	0	0	0	0.0002128	0.0040804	0.0055158	0.0056674
3	Germany	143.1	95.4	0	0	0	0	0.0871192	0	0	0	0.795409
3	Germany	45.8	30.54	0.481569	0.0128	0.225997	0.35427	0.376112	0	0	0	0
3	Germany	250	166.68	0.247167	0.02385	0.067312	0.0792935	0.0799335	0	0	0	0
3	Germany	28.5	18.96	6.88157	0.01925	0.104709	0.149232	0.154912	0.000376	0.001607	0.001911	0.001928
3	Germany	0	0	0.766387	0	0	0	0	0	0	0	0
3	Germany	86.9	57.96	4.02788	0.000183	0.000248	0.000353	0.0003665	0.0004275	0.0089515	0.0121005	0.0124325
3	Germany	106.6	71.04	0.373733	0.02165	0.371046	0.572501	0.605314	8.55e-05	5.95e-05	8.3e-05	8.55e-05
3	Germany	0	0	1.40474	0	0	0	0	0	0	0	0
3	Germany	0	0	5.01258	0	0	0	0	0	0	0	0
3	Germany	0	0	0	0	0	0	0	0	0	0	0
3	Germany	0	0	1.44083	0	0	0	0	0	0	0	0
3	Germany	28.4	18.9	0.58117	0	0	0	0	0.0008265	0.0022665	0.0024572	0.00246205
3	Germany	45	30	1.16805	0.000183	0.000203	0.000339	0.0003665	0.06414	1.49833	2.08658	2.15586
3	Germany	0	0	0.62871	0	0	0	0	0	0	0	0
3	Germany	49.2	32.76	0.100857	0.2941	2.621	3.78408	3.93891	0	0	0	0
3	Germany	59.7	39.84	0.495037	0	0	0	0	0.005825	0.199018	0.276143	0.28511
3	Germany	41.3	27.48	0.358357	0	0	0	0	0.38804	0.820964	1.13954	1.17663
3	Germany	39.9	26.58	0.104677	0	0	0	0	0.944155	15.2521	21.1682	21.8566
3	Germany	51.1	34.08	0.542346	0.000183	0.000289	0.000361	0.0003665	0.028745	0.14024	0.165938	0.167351
3	Germany	0	0	0.142941	0	0	0	0	0	0	0	0
3	Germany	0	0	0.337649	0	0	0	0	0	0	0	0
3	Germany	41	27.36	0.549432	0.038	0.078508	0.119387	0.125774	0.002995	0.0063015	0.008343	0.0085415
3	Germany	207	138	1.14891	0.0022	0.0023805	0.003749	0.003985	8e-05	0.014191	0.021447	0.02256
3	Germany	228.6	152.46	0	0	0	0	0.112218	0	0	0	1.00875
3	Germany	49.5	33	0.823733	0.0002745	0.00038925	0.00053325	0.000549	0.153457	0.609349	0.807004	0.826237
3	Germany	0	0	0.573694	0	0	0	0	0	0	0	0
3	Germany	10.7	7.14	0.304735	0.02315	0.36568	0.496526	0.510572	0.0002155	0.000339	0.0004	0.000403
3	Germany	0	0	0.553755	0.0006525	0.000881	0.0008905	0.0008905	0.000125	0.000119	0.000125	0.000125
3	Germany	59.5	39.66	0.843833	0	0	0	0	0.000525	0.0121015	0.016792	0.0173375
3	Germany	42.6	28.38	0.504695	0	0	0	0	0.893765	13.759	19.128	19.7565
3	Germany	0	0	6.38825	0	0	0	0	0	0	0	0
3	Germany	57.5	38.34	0.50422	0.01455	0.225285	0.352345	0.373843	0.0015305	0.014343	0.0198925	0.0205365
3	Germany	51.3	34.2	0.092971	0	0	0	0	0.45853	7.06597	9.80733	10.1264
3	Germany	0	0	0.244593	0	0	0	0	0	0	0	0
3	Germany	33.2	22.14	0.193356	0.000183	0.0002495	0.000353	0.000366	0.16509	1.37454	1.75527	1.78691
3	Germany	49.6	33.06	0.179327	0	0	0	0	0.15511	1.33018	1.84661	1.90675
3	Germany	40.5	27	1.73393	0	0	0	0	0.04678	1.54521	2.15256	2.22417
3	Germany	29.7	19.8	0.188904	0	0	0	0	0.011535	0.079383	0.100529	0.102219
3	Germany	0	0	1.80324	0	0	0	0	0	0	0	0
3	Germany	44.2	29.46	0.602485	0	0	0	0	0.170135	6.13251	8.53161	8.81318
3	Germany	76.4	50.88	0.869858	0	0	0	0	0.01211	0.40235	0.559755	0.578229
3	Germany	66.4	44.28	0.417204	0.0333967	0.270034	0.428348	0.456193	0.000310969	0.0586885	0.0842536	0.0875946
3	Germany	120.6	80.4	0.260367	0.005	0.008379	0.015066	0.016667	0.00014	0.027202	0.038166	0.039491
3	Germany	0	0	6.47157	0	0	0	0	0	0	0	0
3	Germany	114.7	76.5	0.403452	0.00985	0.0269125	0.0346225	0.035285	0.0003205	0.004968	0.006894	0.007118
3	Germany	78.7	52.44	0.60021	0.00805	0.016249	0.028006	0.030558	0.001935	0.0619065	0.0859095	0.0887015
3	Germany	17.6	11.76	0.289427	0.0359	0.0942235	0.13867	0.144959	0.000337	0.000749	0.0010365	0.0010695
3	Germany	7.5	5.04	0.562393	0.0226	0.551199	0.811551	0.848443	0.0003025	0.0007155	0.000942	0.0009635
3	Germany	0	0	4.42795	0	0	0	0	0	0	0	0
3	Germany	49	32.64	7.02791	0.0065	0.0558485	0.088453	0.0941635	0.002622	0.023521	0.032682	0.0337525
3	Germany	0	0	1.14788	0	0	0	0	0	0	0	0
3	Germany	57.3	38.22	0.340861	0.0608832	0.0979534	0.120838	0.122441	0.00232064	0.018144	0.0251718	0.0259885
3	Germany	0	0	1.19272	0	0	0	0	0	0	0	0
3	Germany	250	166.68	0	0	0	0	0.0362078	0	0	0	0.0578269
3	Germany	0	0	1.33702	0	0	0	0	0	0	0	0
3	Germany	0	0	1.20418	0	0	0	0	0	0	0	0
3	Germany	65.1	43.38	2.38334	0	0	0	0	0.047665	0.16889	0.19645	0.197799
3	Germany	0	0	2.05679	0	0	0	0	0	0	0	0
3	Germany	48.7	32.52	0.166183	0.0205	0.344245	0.539633	0.572904	0.0001305	0.024989	0.035369	0.0366625
3	Germany	64.5	40.02	4.47856	0	0	0	0.126836	0	0	0	1.19776
3	Germany	0	0	278.068	0	0	0	0	0	0	0	0
3	Germany	0	0	4.57486	0	0	0	0	0	0	0	0
3	Germany	0	0	4.64132	0	0	0	0	0	0	0	0
3	Germany	0	0	1.75478	0	0	0	0	0	0	0	0
3	Germany	51.4	34.26	3.52032	0	0	0	0	0.00054	0.0129865	0.017642	0.018143
3	Germany	41.5	27.66	0.455658	0	0	0	0	0.372165	0.787255	1.09289	1.12849
3	Germany	61.7	41.16	0.175396	0	0	0	0	0.43573	0.944684	1.28455	1.32124
3	Germany	250	166.68	1.89229	0	0	0	0	0.0005085	0.011878	0.0161195	0.016574
3	Germany	216.9	144.6	0	0	0	0	0.0271151	0	0	0	0.261675
3	Germany	35.1	23.4	0.689997	0	0	0	0	0.323575	1.68016	2.16569	2.20779
3	Germany	39.3	26.22	0.476244	9.15e-05	0.000127	0.00017725	0.00018325	0.569227	2.45327	3.33589	3.43116
3	Germany	78.2	52.14	2.84435	0.000366	0.000356	0.000656	0.000732	0.0567	0.235116	0.274616	0.276607
3	Germany	91.9	61.26	3.05164	0	0	0	0	0.03498	0.0924115	0.105181	0.10571
3	Germany	59.5	39.66	0.660388	0	0	0	0	0.554135	2.50754	3.26507	3.33373
3	Germany	45.2	30.12	2.92769	0	0	0	0	0.01433	0.133303	0.18535	0.191447
3	Germany	37.2	24.84	7.76977	0	0	0	0	0.08733	0.863287	1.21315	1.25569
3	Germany	35.8	23.88	1.13406	0.000366	0.000506	0.000708	0.000732	0.24041	1.15694	1.42115	1.43925
3	Germany	33.1	22.08	0.0502605	1.139	2.61033	4.18858	4.47485	0.03767	0.523392	0.725353	0.748732
3	Germany	50.9	33.9	0.437535	0.0487	0.324922	0.454726	0.470282	0.000221	0.0009875	0.0013695	0.001414
3	Germany	63.6	42.36	1.49367	0.000183	0.000315	0.000364	0.0003665	0.02773	0.0720655	0.0831375	0.0836475
3	Germany	45.9	30.54	1.44454	0	0	0	0	0.24699	2.14039	2.98389	3.08361
3	Germany	75	46.56	4.41774	0	0	0	0.675087	0	0	0	6.11778
3	Germany	147.5	98.34	0	0	0	0	0.0667955	0	0	0	0.6024
3	Germany	61.3	40.86	0.22919	0.01875	0.035413	0.047961	0.049295	0.238105	1.83917	2.41034	2.46356
3	Germany	45.4	30.3	0.133882	0	0	0	0	0.12657	1.16775	1.62061	1.6733
3	Germany	42.8	28.5	0.127457	0	0	0	0	0.753594	6.84508	9.50321	9.81287
3	Germany	0	0	1.58395	0	0	0	0	0	0	0	0
3	Germany	44.6	29.76	0.785935	0	0	0	0	0.9701	8.12163	11.2926	11.664
3	Germany	136	90.66	2.37279	0.000183	0.000209	0.000341	0.000366	0.005	0.977251	1.36404	1.40996
3	Germany	160	106.68	1.86994	0	0	0	0	0.004745	0.903235	1.28876	1.33813
3	Germany	0	0	35.2612	0	0	0	0	0	0	0	0
3	Germany	0	0	1.34648	0	0	0	0	0	0	0	0
3	Germany	0	0	0.529812	0	0	0	0	0	0	0	0
3	Germany	0	0	0.824565	0	0	0	0	0	0	0	0
3	Germany	0	0	0.496673	0	0	0	0	0	0	0	0
3	Germany	250	166.68	0.526343	0.000529	0.0068945	0.0089615	0.0091475	0	0	0	0
3	Germany	162.1	108.06	0	0	0	0	0.345001	0	0	0	3.10775
3	Germany	50.1	33.42	0.282708	0.008233	0.0186705	0.027299	0.0285055	0.158085	0.334413	0.463928	0.478977
3	Germany	64.3	42.9	2.84962	0	0	0	0	0.088155	0.196453	0.253519	0.258492
3	Germany	0	0	0.566555	0	0	0	0	0	0	0	0
3	Germany	45.3	30.18	0.666902	0.000183	0.000314	0.0003635	0.000366	0.08356	0.176477	0.245044	0.253036
3	Germany	52.2	34.8	2.13808	0	0	0	0	0.04668	0.491291	0.68311	0.705577
3	Germany	64.5	42.96	2.93313	0	0	0	0	0.006478	0.0404375	0.0521835	0.053207
3	Germany	40.7	27.12	0.14967	0	0	0	0	0.54087	4.05619	5.61487	5.79455
3	Germany	0	0	1.02307	0	0	0	0	0	0	0	0
3	Germany	40.8	27.24	0.108271	0	0	0	0	0.97324	15.7233	21.8292	22.5405
3	Germany	27.8	18.48	0.366362	0.02335	0.535046	0.842653	0.895706	0.000498	0.093841	0.134363	0.139614
3	Germany	182.4	121.56	54.0545	0	0	0	0	0	0	0	0
3	Germany	41.2	27.48	0.927363	0.000319847	0.000394129	0.000605613	0.000639695	0.187373	1.26566	1.6283	1.65948
3	Germany	43.8	29.16	1.82715	0	0	0	0	0.0491481	0.526658	0.732286	0.756372
3	Germany	32.1	21.36	0.889688	0	0	0	0	0.651659	4.23883	5.59039	5.71967
3	Germany	52.8	35.22	0.640982	0.0434	0.19538	0.264705	0.272084	0	0	0	0
3	Germany	123.6	82.38	0.466617	0.01735	0.299748	0.475484	0.506393	0.0029085	0.545478	0.787107	0.819217
3	Germany	43	28.68	0.209685	0	0	0	0	0.07007	1.22163	1.69603	1.75129
3	Germany	40.3	26.88	0.486176	0.0023	0.249383	0.379186	0.399454	0	0	0	0
3	Germany	0	0	3.9881	0	0	0	0	0	0	0	0
3	Germany	0	0	14.0721	0	0	0	0	0	0	0	0
3	Germany	0	0	1.88274	0	0	0	0	0	0	0	0
3	Germany	0	0	0.595029	0	0	0	0	0	0	0	0
3	Germany	0	0	0.828128	0	0	0	0	0	0	0	0
3	Germany	0	0	7.92843	0	0	0	0	0	0	0	0
3	Germany	119	79.38	40.5358	0	0	0	0.175611	0	0	0	0.0758939
3	Germany	70.8	47.22	15.4488	0	0	0	0.111226	0	0	0	0.151136
3	Germany	39.3	26.16	0.248382	0	0	0	0	0.0339663	0.229067	0.281725	0.285357
3	Germany	69.9	46.56	0.51892	0	0	0	0	0.05552	0.210269	0.293134	0.302931
3	Germany	29.2	19.44	0.76272	0	0	0	0	0.013785	0.0880425	0.111697	0.113603
3	Germany	33.7	20.88	19.0567	0	0	0	0	0.024051	0.124053	0.208363	0.225553
3	Germany	38.4	25.62	0.205246	0.0886	1.01032	1.59877	1.70159	0.02084	0.753421	1.04555	1.07953
3	Germany	0	0	2.68812	0	0	0	0	0	0	0	0
3	Germany	0	0	5.88408	0	0	0	0	0	0	0	0
3	Germany	48.7	32.46	0.26542	0.127287	0.984842	1.31456	1.34768	0.00993755	0.022653	0.0293105	0.0298975
3	Germany	250	166.68	0.891271	0.000363124	0.00773421	0.00847759	0.00849914	0.000309236	0.000616261	0.000654673	0.000655502
3	Germany	23.8	15.9	0.309077	0.011054	0.147303	0.232675	0.247518	0.00281076	0.0963315	0.13278	0.136918
3	Germany	66.7	41.4	4.62465	0	0	0	0.071432	0	0	0	0.674625
3	Germany	0	0	3.70896	0	0	0	0	0	0	0	0
3	Germany	51.2	34.14	1.1008	0	0	0	0	0.404295	0.922102	1.20067	1.22592
3	Germany	0	0	0.663266	0	0	0	0	0	0	0	0
3	Germany	43.8	29.16	0.206091	0	0	0	0	0.14805	1.97477	2.74091	2.83008
3	Germany	64.9	43.26	0.170658	0	0	0	0	0.020245	0.695199	0.964753	0.996107
3	Germany	69.1	46.08	1.19887	0	0	0	0	0.151071	0.925908	1.05997	1.06579
3	Germany	48.1	32.04	0.194435	0	0	0	0	0.159265	1.47791	2.05198	2.11887
3	Germany	155.4	103.62	0	0	0	0	0.119351	0	0	0	1.08986
3	Germany	152.8	101.88	0.00185525	0	0	0	0.104359	0	0	0	0.954178
3	Germany	122.7	81.84	0.235122	0	0	0	0	0.0908512	0.149539	0.192978	0.196763
3	Germany	141.4	94.26	0.00118299	0	0	0	0.0744735	0	0	0	0.682954
3	Germany	0	0	0.785875	0	0	0	0	0	0	0	0
3	Germany	0	0	0.43056	0	0	0	0	0	0	0	0
3	Germany	42.9	28.56	0.152814	0	0	0	0	0.06018	2.1751	3.01914	3.1174
3	Germany	37.3	24.9	2.33832	0	0	0	0	0.0002128	0.0040804	0.0055158	0.0056674
3	Germany	143.1	95.4	0	0	0	0	0.0290397	0	0	0	0.265136
3	Germany	45.8	30.54	0.481569	0.0128	0.225997	0.35427	0.376112	0	0	0	0
3	Germany	250	166.68	0.247167	0.02385	0.067312	0.0792935	0.0799335	0	0	0	0
3	Germany	28.5	18.96	6.88157	0.01925	0.104709	0.149232	0.154912	0.000376	0.001607	0.001911	0.001928
3	Germany	86.9	57.96	4.02788	0.000183	0.000248	0.000353	0.0003665	0.0004275	0.0089515	0.0121005	0.0124325
3	Germany	106.6	71.04	0.373733	0.02165	0.371046	0.572501	0.605314	8.55e-05	5.95e-05	8.3e-05	8.55e-05
3	Germany	0	0	1.40474	0	0	0	0	0	0	0	0
3	Germany	0	0	5.01258	0	0	0	0	0	0	0	0
3	Germany	0	0	1.44083	0	0	0	0	0	0	0	0
3	Germany	28.4	18.9	0.58117	0	0	0	0	0.0008265	0.0022665	0.0024572	0.00246205
3	Germany	45	30	1.16805	0.000183	0.000203	0.000339	0.0003665	0.06414	1.49833	2.08658	2.15586
3	Germany	59.7	39.84	0.495037	0	0	0	0	0.005825	0.199018	0.276143	0.28511
3	Germany	41.3	27.48	0.358357	0	0	0	0	0.38804	0.820964	1.13954	1.17663
3	Germany	39.9	26.58	0.104677	0	0	0	0	0.944155	15.2521	21.1682	21.8566
3	Germany	51.1	34.08	0.542346	0.000183	0.000289	0.000361	0.0003665	0.028745	0.14024	0.165938	0.167351
3	Germany	0	0	0.142941	0	0	0	0	0	0	0	0
3	Germany	0	0	0.337649	0	0	0	0	0	0	0	0
3	Germany	41	27.36	0.549432	0.038	0.078508	0.119387	0.125774	0.002995	0.0063015	0.008343	0.0085415
3	Germany	207	138	1.14891	0.0022	0.0023805	0.003749	0.003985	8e-05	0.014191	0.021447	0.02256
3	Germany	228.6	152.46	0	0	0	0	0.112218	0	0	0	1.00875
3	Germany	0	0	0.573694	0	0	0	0	0	0	0	0
3	Germany	0	0	0.553755	0.0006525	0.000881	0.0008905	0.0008905	0.000125	0.000119	0.000125	0.000125
3	Germany	59.5	39.66	0.843833	0	0	0	0	0.000525	0.0121015	0.016792	0.0173375
3	Germany	42.6	28.38	0.504695	0	0	0	0	0.893765	13.759	19.128	19.7565
3	Germany	0	0	6.38825	0	0	0	0	0	0	0	0
3	Germany	57.5	38.34	0.50422	0.01455	0.225285	0.352345	0.373843	0.0015305	0.014343	0.0198925	0.0205365
3	Germany	51.3	34.2	0.092971	0	0	0	0	0.45853	7.06597	9.80733	10.1264
3	Germany	0	0	0.244593	0	0	0	0	0	0	0	0
3	Germany	33.2	22.14	0.193356	0.000183	0.0002495	0.000353	0.000366	0.16509	1.37454	1.75527	1.78691
3	Germany	49.6	33.06	0.179327	0	0	0	0	0.15511	1.33018	1.84661	1.90675
3	Germany	40.5	27	1.73393	0	0	0	0	0.04678	1.54521	2.15256	2.22417
3	Germany	0	0	1.80324	0	0	0	0	0	0	0	0
3	Germany	44.2	29.46	0.602485	0	0	0	0	0.170135	6.13251	8.53161	8.81318
3	Germany	76.4	50.88	0.869858	0	0	0	0	0.01211	0.40235	0.559755	0.578229
3	Germany	114.7	76.5	0.403452	0.00985	0.0269125	0.0346225	0.035285	0.0003205	0.004968	0.006894	0.007118
3	Germany	78.7	52.44	0.60021	0.00805	0.016249	0.028006	0.030558	0.001935	0.0619065	0.0859095	0.0887015
3	Germany	0	0	4.42795	0	0	0	0	0	0	0	0
3	Germany	49	32.64	7.02791	0.0065	0.0558485	0.088453	0.0941635	0.002622	0.023521	0.032682	0.0337525
3	Germany	0	0	1.14788	0	0	0	0	0	0	0	0
3	Germany	0	0	49.1599	0	0	0	0	0	0	0	0
3	Germany	250	166.68	0	0	0	0	0.0181012	0	0	0	0.0289091
3	Germany	65.1	43.38	2.38334	0	0	0	0	0.047665	0.16889	0.19645	0.197799
3	Germany	0	0	2.05679	0	0	0	0	0	0	0	0
3	Germany	48.7	32.52	0.166183	0.0205	0.344245	0.539633	0.572904	0.0001305	0.024989	0.035369	0.0366625
3	Germany	0	0	278.068	0	0	0	0	0	0	0	0
3	Germany	0	0	4.57486	0	0	0	0	0	0	0	0
3	Germany	0	0	4.64132	0	0	0	0	0	0	0	0
3	Germany	0	0	1.75478	0	0	0	0	0	0	0	0
3	Germany	51.4	34.26	3.52032	0	0	0	0	0.00054	0.0129865	0.017642	0.018143
3	Germany	41.5	27.66	0.455658	0	0	0	0	0.372165	0.787255	1.09289	1.12849
3	Germany	61.7	41.16	0.175396	0	0	0	0	0.43573	0.944684	1.28455	1.32124
3	Germany	250	166.68	1.89229	0	0	0	0	0.0005085	0.011878	0.0161195	0.016574
3	Germany	216.9	144.6	0	0	0	0	0.0271151	0	0	0	0.261675
3	Germany	35.1	23.4	0.689997	0	0	0	0	0.323575	1.68016	2.16569	2.20779
3	Germany	39.3	26.22	0.476244	9.15e-05	0.000127	0.00017725	0.00018325	0.569227	2.45327	3.33589	3.43116
3	Germany	91.9	61.26	3.05164	0	0	0	0	0.03498	0.0924115	0.105181	0.10571
3	Germany	59.5	39.66	0.660388	0	0	0	0	0.554135	2.50754	3.26507	3.33373
3	Germany	37.2	24.84	7.76977	0	0	0	0	0.08733	0.863287	1.21315	1.25569
3	Germany	50.9	33.9	0.437535	0.0487	0.324922	0.454726	0.470282	0.000221	0.0009875	0.0013695	0.001414
3	Germany	63.6	42.36	1.49367	0.000183	0.000315	0.000364	0.0003665	0.02773	0.0720655	0.0831375	0.0836475
3	Germany	45.9	30.54	1.44454	0	0	0	0	0.24699	2.14039	2.98389	3.08361
3	Germany	75	46.56	4.41774	0	0	0	0.675087	0	0	0	6.11778
3	Germany	147.5	98.34	0	0	0	0	0.0667955	0	0	0	0.6024
3	Germany	0	0	0	0	0	0	0	0	0	0	0
3	Germany	61.3	40.86	0.22919	0.01875	0.035413	0.047961	0.049295	0.238105	1.83917	2.41034	2.46356
3	Germany	45.4	30.3	0.133882	0	0	0	0	0.12657	1.16775	1.62061	1.6733
3	Germany	42.8	28.5	0.127457	0	0	0	0	0.753594	6.84508	9.50321	9.81287
3	Germany	0	0	1.58395	0	0	0	0	0	0	0	0
3	Germany	44.6	29.76	0.785935	0	0	0	0	0.9701	8.12163	11.2926	11.664
3	Germany	136	90.66	2.37279	0.000183	0.000209	0.000341	0.000366	0.005	0.977251	1.36404	1.40996
3	Germany	160	106.68	1.86994	0	0	0	0	0.004745	0.903235	1.28876	1.33813
3	Germany	0	0	35.2612	0	0	0	0	0	0	0	0
3	Germany	0	0	1.34648	0	0	0	0	0	0	0	0
3	Germany	0	0	0.529812	0	0	0	0	0	0	0	0
3	Germany	0	0	0.824565	0	0	0	0	0	0	0	0
3	Germany	0	0	0.496673	0	0	0	0	0	0	0	0
3	Germany	250	166.68	0.526343	0.000529	0.0068945	0.0089615	0.0091475	0	0	0	0
3	Germany	50.1	33.42	0.282708	0.008233	0.0186705	0.027299	0.0285055	0.158085	0.334413	0.463928	0.478977
3	Germany	64.3	42.9	2.84962	0	0	0	0	0.029385	0.0654844	0.0845063	0.0861639
3	Germany	45.3	30.18	0.666902	0.000183	0.000314	0.0003635	0.000366	0.08356	0.176477	0.245044	0.253036
3	Germany	52.2	34.8	2.13808	0	0	0	0	0.04668	0.491291	0.68311	0.705577
3	Germany	64.5	42.96	2.93313	0	0	0	0	0.006478	0.0404375	0.0521835	0.053207
3	Germany	40.7	27.12	0.14967	0	0	0	0	0.54087	4.05619	5.61487	5.79455
3	Germany	0	0	1.02307	0	0	0	0	0	0	0	0
3	Germany	40.8	27.24	0.108271	0	0	0	0	0.97324	15.7233	21.8292	22.5405
3	Germany	27.8	18.48	0.366362	0.02335	0.535046	0.842653	0.895706	0.000498	0.093841	0.134363	0.139614
3	Germany	52.8	35.22	0.640982	0.0434	0.19538	0.264705	0.272084	0	0	0	0
3	Germany	123.6	82.38	0.466617	0.01735	0.299748	0.475484	0.506393	0.0029085	0.545478	0.787107	0.819217
3	Germany	43	28.68	0.209685	0	0	0	0	0.07007	1.22163	1.69603	1.75129
3	Germany	40.3	26.88	0.486176	0.0023	0.249383	0.379186	0.399454	0	0	0	0
3	Germany	0	0	3.9881	0	0	0	0	0	0	0	0
3	Germany	0	0	14.0721	0	0	0	0	0	0	0	0
3	Germany	0	0	1.88274	0	0	0	0	0	0	0	0
3	Germany	0	0	0.595029	0	0	0	0	0	0	0	0
3	Germany	0	0	0	0	0	0	0	0	0	0	0
3	Germany	98.6	65.7	31.7221	0	0	0	0.78142	0	0	0	0.329283
3	Germany	30.4	20.28	0.296758	0.0439	0.106472	0.169665	0.180917	0.00348	0.0244222	0.0331505	0.0340865
3	Germany	0	0	0	0	0	0	0	0	0	0	0
3	Germany	0	0	0	0	0	0	0	0	0	0	0
3	Germany	0	0	0	0	0	0	0	0	0	0	0
3	Germany	0	0	0	0	0	0	0	0	0	0	0
3	Germany	0	0	0	0	0	0	0	0	0	0	0
3	Germany	0	0	0	0	0	0	0	0	0	0	0
3	Germany	0	0	0	0	0	0	0	0	0	0	0
3	Germany	0	0	0	0	0	0	0	0	0	0	0
3	Germany	0	0	0	0	0	0	0	0	0	0	0
3	Germany	0	0	0	0	0	0	0	0	0	0	0
3	Germany	0	0	0	0	0	0	0	0	0	0	0
3	Germany	0	0	0	0	0	0	0	0	0	0	0
3	Germany	0	0	0	0	0	0	0	0	0	0	0
3	Germany	0	0	0	0	0	0	0	0	0	0	0
3	Germany	0	0	0	0	0	0	0	0	0	0	0
3	Germany	0	0	0	0	0	0	0	0	0	0	0
3	Germany	0	0	0	0	0	0	0	0	0	0	0
3	Germany	0	0	0	0	0	0	0	0	0	0	0
3	Germany	0	0	0	0	0	0	0	0	0	0	0
3	Germany	0	0	0	0	0	0	0	0	0	0	0
3	Germany	0	0	0	0	0	0	0	0	0	0	0
3	Germany	0	0	0	0	0	0	0	0	0	0	0
3	Germany	0	0	0	0	0	0	0	0	0	0	0
3	Germany	0	0	0	0	0	0	0	0	0	0	0
3	Germany	0	0	0	0	0	0	0	0	0	0	0
3	Germany	0	0	0	0	0	0	0	0	0	0	0
3	Germany	0	0	0	0	0	0	0	0	0	0	0
3	Germany	0	0	0	0	0	0	0	0	0	0	0
3	Germany	0	0	0	0	0	0	0	0	0	0	0
3	Germany	0	0	0	0	0	0	0	0	0	0	0
3	Germany	0	0	0	0	0	0	0	0	0	0	0
3	Germany	0	0	0	0	0	0	0	0	0	0	0
3	Germany	0	0	0	0	0	0	0	0	0	0	0
3	Germany	0	0	0	0	0	0	0	0	0	0	0
3	Germany	0	0	0	0	0	0	0	0	0	0	0
3	Germany	0	0	1.49854	0	0	0	0	0	0	0	0
3	Germany	0	0	0	0	0	0	0	0	0	0	0
3	Germany	0	0	0	0	0	0	0	0	0	0	0
3	Germany	0	0	0	0	0	0	0	0	0	0	0
3	Germany	0	0	0	0	0	0	0	0	0	0	0
3	Germany	0	0	0	0	0	0	0	0	0	0	0
3	Germany	0	0	0	0	0	0	0	0	0	0	0
3	Germany	0	0	0	0	0	0	0	0	0	0	0
3	Germany	0	0	0	0	0	0	0	0	0	0	0
3	Germany	0	0	0	0	0	0	0	0	0	0	0
3	Germany	0	0	0	0	0	0	0	0	0	0	0
3	Germany	0	0	0	0	0	0	0	0	0	0	0
3	Germany	0	0	0	0	0	0	0	0	0	0	0
3	Germany	0	0	0	0	0	0	0	0	0	0	0
3	Germany	0	0	0	0	0	0	0	0	0	0	0
3	Germany	0	0	0	0	0	0	0	0	0	0	0
3	Germany	0	0	0	0	0	0	0	0	0	0	0
3	Germany	0	0	0	0	0	0	0	0	0	0	0
3	Germany	0	0	0	0	0	0	0	0	0	0	0
3	Germany	0	0	0	0	0	0	0	0	0	0	0
3	Germany	0	0	0	0	0	0	0	0	0	0	0
3	Germany	0	0	0	0	0	0	0	0	0	0	0
3	Germany	0	0	0	0	0	0	0	0	0	0	0
3	Germany	0	0	0	0	0	0	0	0	0	0	0
3	Germany	0	0	0	0	0	0	0	0	0	0	0
3	Germany	0	0	0	0	0	0	0	0	0	0	0
3	Germany	0	0	0	0	0	0	0	0	0	0	0
3	Germany	0	0	0	0	0	0	0	0	0	0	0
3	Germany	0	0	0	0	0	0	0	0	0	0	0
3	Germany	0	0	0	0	0	0	0	0	0	0	0
3	Germany	0	0	0	0	0	0	0	0	0	0	0
3	Germany	0	0	0	0	0	0	0	0	0	0	0
3	Germany	0	0	0	0	0	0	0	0	0	0	0
3	Germany	0	0	0	0	0	0	0	0	0	0	0
3	Germany	0	0	0	0	0	0	0	0	0	0	0
3	Germany	0	0	0	0	0	0	0	0	0	0	0
3	Germany	0	0	0	0	0	0	0	0	0	0	0
3	Germany	0	0	0	0	0	0	0	0	0	0	0
3	Germany	0	0	0	0	0	0	0	0	0	0	0
3	Germany	0	0	0	0	0	0	0	0	0	0	0
3	Germany	0	0	0	0	0	0	0	0	0	0	0
3	Germany	0	0	0	0	0	0	0	0	0	0	0
3	Germany	0	0	0	0	0	0	0	0	0	0	0
3	Germany	0	0	0	0	0	0	0	0	0	0	0
3	Germany	0	0	0	0	0	0	0	0	0	0	0
3	Germany	0	0	0	0	0	0	0	0	0	0	0
3	Germany	0	0	0	0	0	0	0	0	0	0	0
3	Germany	0	0	0	0	0	0	0	0	0	0	0
3	Germany	0	0	0	0	0	0	0	0	0	0	0
3	Germany	0	0	0	0	0	0	0	0	0	0	0
3	Germany	0	0	0	0	0	0	0	0	0	0	0
3	Germany	0	0	0	0	0	0	0	0	0	0	0
3	Germany	0	0	0	0	0	0	0	0	0	0	0
3	Germany	0	0	0	0	0	0	0	0	0	0	0
3	Germany	0	0	0	0	0	0	0	0	0	0	0
3	Germany	0	0	0	0	0	0	0	0	0	0	0
3	Germany	0	0	0	0	0	0	0	0	0	0	0
3	Germany	0	0	0	0	0	0	0	0	0	0	0
3	Germany	0	0	0	0	0	0	0	0	0	0	0
3	Germany	0	0	0	0	0	0	0	0	0	0	0
3	Germany	0	0	0	0	0	0	0	0	0	0	0
3	Germany	0	0	0	0	0	0	0	0	0	0	0
3	Germany	0	0	0	0	0	0	0	0	0	0	0
3	Germany	0	0	0	0	0	0	0	0	0	0	0
3	Germany	0	0	0	0	0	0	0	0	0	0	0
3	Germany	0	0	0	0	0	0	0	0	0	0	0
3	Germany	0	0	0	0	0	0	0	0	0	0	0
3	Germany	0	0	0	0	0	0	0	0	0	0	0
3	Germany	0	0	0	0	0	0	0	0	0	0	0
3	Germany	0	0	0	0	0	0	0	0	0	0	0
3	Germany	0	0	0	0	0	0	0	0	0	0	0
3	Germany	0	0	0	0	0	0	0	0	0	0	0
3	Germany	0	0	1.47243	0	0	0	0	0	0	0	0
3	Germany	0	0	0	0	0	0	0	0	0	0	0
3	Germany	0	0	0	0	0	0	0	0	0	0	0
3	Germany	0	0	0	0	0	0	0	0	0	0	0
3	Germany	0	0	0	0	0	0	0	0	0	0	0
3	Germany	0	0	0	0	0	0	0	0	0	0	0
3	Germany	0	0	0	0	0	0	0	0	0	0	0
3	Germany	0	0	0	0	0	0	0	0	0	0	0
3	Germany	0	0	0	0	0	0	0	0	0	0	0
3	Germany	0	0	0	0	0	0	0	0	0	0	0
3	Germany	0	0	0	0	0	0	0	0	0	0	0
3	Germany	0	0	0	0	0	0	0	0	0	0	0
3	Germany	0	0	0	0	0	0	0	0	0	0	0
3	Germany	0	0	0	0	0	0	0	0	0	0	0
3	Germany	0	0	0	0	0	0	0	0	0	0	0
3	Germany	0	0	0	0	0	0	0	0	0	0	0
3	Germany	0	0	0	0	0	0	0	0	0	0	0
3	Germany	0	0	0	0	0	0	0	0	0	0	0
3	Germany	0	0	0	0	0	0	0	0	0	0	0
3	Germany	0	0	0	0	0	0	0	0	0	0	0
3	Germany	0	0	0	0	0	0	0	0	0	0	0
3	Germany	0	0	0	0	0	0	0	0	0	0	0
3	Germany	0	0	0	0	0	0	0	0	0	0	0
3	Germany	0	0	0	0	0	0	0	0	0	0	0
3	Germany	0	0	0	0	0	0	0	0	0	0	0
3	Germany	0	0	0	0	0	0	0	0	0	0	0
3	Germany	0	0	0	0	0	0	0	0	0	0	0
3	Germany	0	0	0	0	0	0	0	0	0	0	0
3	Germany	0	0	0	0	0	0	0	0	0	0	0
3	Germany	0	0	0	0	0	0	0	0	0	0	0
3	Germany	0	0	0	0	0	0	0	0	0	0	0
3	Germany	0	0	0	0	0	0	0	0	0	0	0
3	Germany	0	0	0	0	0	0	0	0	0	0	0
3	Germany	0	0	0	0	0	0	0	0	0	0	0
3	Germany	0	0	0	0	0	0	0	0	0	0	0
3	Germany	0	0	0	0	0	0	0	0	0	0	0
3	Germany	0	0	0	0	0	0	0	0	0	0	0
3	Germany	0	0	0	0	0	0	0	0	0	0	0
3	Germany	0	0	0	0	0	0	0	0	0	0	0
3	Germany	0	0	0	0	0	0	0	0	0	0	0
3	Germany	0	0	0	0	0	0	0	0	0	0	0
3	Germany	0	0	0	0	0	0	0	0	0	0	0
3	Germany	0	0	0	0	0	0	0	0	0	0	0
3	Germany	0	0	0	0	0	0	0	0	0	0	0
3	Germany	0	0	0	0	0	0	0	0	0	0	0
3	Germany	0	0	0	0	0	0	0	0	0	0	0
3	Germany	0	0	0	0	0	0	0	0	0	0	0
3	Germany	0	0	0	0	0	0	0	0	0	0	0
3	Germany	0	0	0	0	0	0	0	0	0	0	0
3	Germany	0	0	0	0	0	0	0	0	0	0	0
3	Germany	0	0	0	0	0	0	0	0	0	0	0
3	Germany	0	0	0	0	0	0	0	0	0	0	0
3	Germany	0	0	0	0	0	0	0	0	0	0	0
3	Germany	0	0	0	0	0	0	0	0	0	0	0
3	Germany	0	0	0	0	0	0	0	0	0	0	0
3	Germany	0	0	0	0	0	0	0	0	0	0	0
3	Germany	0	0	0	0	0	0	0	0	0	0	0
3	Germany	0	0	0	0	0	0	0	0	0	0	0
3	Germany	0	0	0	0	0	0	0	0	0	0	0
3	Germany	0	0	0	0	0	0	0	0	0	0	0
3	Germany	0	0	0	0	0	0	0	0	0	0	0
3	Germany	0	0	0	0	0	0	0	0	0	0	0
3	Germany	0	0	0	0	0	0	0	0	0	0	0
3	Germany	0	0	0	0	0	0	0	0	0	0	0
3	Germany	0	0	0	0	0	0	0	0	0	0	0
3	Germany	0	0	0	0	0	0	0	0	0	0	0
3	Germany	0	0	0	0	0	0	0	0	0	0	0
3	Germany	0	0	0	0	0	0	0	0	0	0	0
3	Germany	0	0	0	0	0	0	0	0	0	0	0
3	Germany	0	0	0	0	0	0	0	0	0	0	0
3	Germany	0	0	0	0	0	0	0	0	0	0	0
3	Germany	0	0	0	0	0	0	0	0	0	0	0
3	Germany	0	0	0	0	0	0	0	0	0	0	0
3	Germany	0	0	0	0	0	0	0	0	0	0	0
3	Germany	0	0	0	0	0	0	0	0	0	0	0
3	Germany	0	0	0	0	0	0	0	0	0	0	0
3	Germany	0	0	0	0	0	0	0	0	0	0	0
3	Germany	0	0	0	0	0	0	0	0	0	0	0
3	Germany	0	0	0	0	0	0	0	0	0	0	0
3	Germany	0	0	0	0	0	0	0	0	0	0	0
3	Germany	0	0	0	0	0	0	0	0	0	0	0
3	Germany	0	0	0	0	0	0	0	0	0	0	0
3	Germany	0	0	0	0	0	0	0	0	0	0	0
3	Germany	0	0	0	0	0	0	0	0	0	0	0
3	Germany	0	0	0	0	0	0	0	0	0	0	0
3	Germany	0	0	0	0	0	0	0	0	0	0	0
3	Germany	0	0	0	0	0	0	0	0	0	0	0
3	Germany	0	0	0	0	0	0	0	0	0	0	0
3	Germany	0	0	0	0	0	0	0	0	0	0	0
3	Germany	0	0	0	0	0	0	0	0	0	0	0
3	Germany	0	0	0	0	0	0	0	0	0	0	0
3	Germany	0	0	0	0	0	0	0	0	0	0	0
3	Germany	0	0	0	0	0	0	0	0	0	0	0
3	Germany	0	0	0	0	0	0	0	0	0	0	0
3	Germany	0	0	0	0	0	0	0	0	0	0	0
3	Germany	0	0	0	0	0	0	0	0	0	0	0
3	Germany	0	0	0	0	0	0	0	0	0	0	0
3	Germany	0	0	0	0	0	0	0	0	0	0	0
3	Germany	0	0	0	0	0	0	0	0	0	0	0
3	Germany	0	0	0	0	0	0	0	0	0	0	0
3	Germany	0	0	0	0	0	0	0	0	0	0	0
3	Germany	0	0	0	0	0	0	0	0	0	0	0
3	Germany	0	0	0	0	0	0	0	0	0	0	0
3	Germany	0	0	0	0	0	0	0	0	0	0	0
3	Germany	0	0	0	0	0	0	0	0	0	0	0
3	Germany	0	0	0	0	0	0	0	0	0	0	0
3	Germany	0	0	0	0	0	0	0	0	0	0	0
3	Germany	0	0	0	0	0	0	0	0	0	0	0
3	Germany	0	0	0	0	0	0	0	0	0	0	0
3	Germany	0	0	0	0	0	0	0	0	0	0	0
3	Germany	0	0	0	0	0	0	0	0	0	0	0
3	Germany	0	0	0	0	0	0	0	0	0	0	0
3	Germany	0	0	0	0	0	0	0	0	0	0	0
3	Germany	0	0	0	0	0	0	0	0	0	0	0
3	Germany	0	0	0	0	0	0	0	0	0	0	0
3	Germany	0	0	0	0	0	0	0	0	0	0	0
3	Germany	0	0	0	0	0	0	0	0	0	0	0
3	Germany	0	0	0	0	0	0	0	0	0	0	0
3	Germany	0	0	0	0	0	0	0	0	0	0	0
3	Germany	0	0	0	0	0	0	0	0	0	0	0
3	Germany	0	0	0	0	0	0	0	0	0	0	0
3	Germany	0	0	0	0	0	0	0	0	0	0	0
3	Germany	0	0	0	0	0	0	0	0	0	0	0
3	Germany	0	0	0	0	0	0	0	0	0	0	0
3	Germany	0	0	0	0	0	0	0	0	0	0	0
3	Germany	0	0	0	0	0	0	0	0	0	0	0
3	Germany	0	0	0	0	0	0	0	0	0	0	0
3	Germany	0	0	0	0	0	0	0	0	0	0	0
3	Germany	0	0	0	0	0	0	0	0	0	0	0
3	Germany	0	0	0	0	0	0	0	0	0	0	0
3	Germany	0	0	0	0	0	0	0	0	0	0	0
3	Germany	0	0	0	0	0	0	0	0	0	0	0
3	Germany	0	0	0	0	0	0	0	0	0	0	0
3	Germany	0	0	0	0	0	0	0	0	0	0	0
3	Germany	0	0	0	0	0	0	0	0	0	0	0
3	Germany	0	0	0	0	0	0	0	0	0	0	0
3	Germany	0	0	0	0	0	0	0	0	0	0	0
3	Germany	0	0	0	0	0	0	0	0	0	0	0
3	Germany	0	0	0	0	0	0	0	0	0	0	0
3	Germany	0	0	0	0	0	0	0	0	0	0	0
3	Germany	0	0	0	0	0	0	0	0	0	0	0
3	Germany	0	0	0	0	0	0	0	0	0	0	0
3	Germany	0	0	0	0	0	0	0	0	0	0	0
3	Germany	0	0	0	0	0	0	0	0	0	0	0
3	Germany	0	0	0	0	0	0	0	0	0	0	0
3	Germany	0	0	0	0	0	0	0	0	0	0	0
3	Germany	0	0	0	0	0	0	0	0	0	0	0
3	Germany	0	0	0	0	0	0	0	0	0	0	0
3	Germany	0	0	0	0	0	0	0	0	0	0	0
3	Germany	0	0	0	0	0	0	0	0	0	0	0
3	Germany	0	0	0	0	0	0	0	0	0	0	0
3	Germany	0	0	0	0	0	0	0	0	0	0	0
3	Germany	0	0	0	0	0	0	0	0	0	0	0
3	Germany	0	0	0	0	0	0	0	0	0	0	0
3	Germany	0	0	0	0	0	0	0	0	0	0	0
3	Germany	0	0	0	0	0	0	0	0	0	0	0
3	Germany	0	0	0	0	0	0	0	0	0	0	0
3	Germany	0	0	0	0	0	0	0	0	0	0	0
3	Germany	0	0	0	0	0	0	0	0	0	0	0
3	Germany	0	0	0	0	0	0	0	0	0	0	0
3	Germany	0	0	0	0	0	0	0	0	0	0	0
3	Germany	0	0	0	0	0	0	0	0	0	0	0
3	Germany	0	0	0	0	0	0	0	0	0	0	0
3	Germany	0	0	0	0	0	0	0	0	0	0	0
3	Germany	0	0	0	0	0	0	0	0	0	0	0
3	Germany	0	0	0	0	0	0	0	0	0	0	0
3	Germany	0	0	0	0	0	0	0	0	0	0	0
3	Germany	0	0	0	0	0	0	0	0	0	0	0
3	Germany	0	0	0	0	0	0	0	0	0	0	0
3	Germany	0	0	0	0	0	0	0	0	0	0	0
3	Germany	69.5	43.14	4.54323	0	0	0	1.33057	0	0	0	12.0601
3	Germany	39.3	26.16	0.248382	0	0	0	0	0.0679325	0.458134	0.56345	0.570713
3	Germany	69.9	46.56	0.51892	0	0	0	0	0.11104	0.420539	0.586268	0.605861
3	Germany	0	0	0	0	0	0	0	0	0	0	0
3	Germany	69.1	46.08	1.19887	0	0	0	0	0.302142	1.85182	2.11994	2.13158
3	Germany	122.7	81.84	0.235122	0	0	0	0	0.181702	0.299078	0.385955	0.393526
3	Germany	23.6	15.72	0.420909	0.000183	0.0002465	0.0003525	0.000366	0.213945	1.65912	2.18904	2.23981
3	Germany	44	29.34	0.6532	0	0	0	0	0.037255	1.2409	1.72347	1.77977
3	Germany	143.1	95.4	0	0	0	0	0.0580795	0	0	0	0.530273
3	Germany	63.1	42.12	0.531693	0.0115	0.191452	0.283916	0.297313	0.00011	8.6e-05	0.000108	0.00011
3	Germany	116.3	77.52	2.55319	0	0	0	0	0.00128	0.032964	0.044885	0.046179
3	Germany	10.7	7.14	0.304735	0.02315	0.36568	0.496526	0.510572	0.0002155	0.000339	0.0004	0.000403
3	Germany	50.4	33.6	1.23598	0.0074	0.08468	0.124148	0.129667	0.00027	0.000189	0.000262	0.00027
3	Germany	31.5	21	0.174293	0.1181	0.750701	0.976703	0.997115	0.00077	0.001146	0.001285	0.00129
3	Germany	29.9	19.92	14.8393	0	0	0	0	0.05298	0.345969	0.624611	0.691936
3	Germany	20.2	13.5	3.55028	0.000366	0.000529	0.000713	0.000732	0.08885	0.538208	0.689288	0.702011
3	Germany	0	0	6.47157	0	0	0	0	0	0	0	0
3	Germany	17.6	11.76	0.289427	0.0359	0.0942235	0.13867	0.144959	0.000337	0.000749	0.0010365	0.0010695
3	Germany	7.5	5.04	0.562393	0.0226	0.551199	0.811551	0.848443	0.0003025	0.0007155	0.000942	0.0009635
3	Germany	0	0	1.33702	0	0	0	0	0	0	0	0
3	Germany	0	0	1.20418	0	0	0	0	0	0	0	0
3	Germany	32.4	21.6	0.768445	0.0351	0.510222	0.767093	0.805889	0.012276	0.026259	0.035314	0.03625
3	Germany	71.3	44.28	4.26118	0	0	0	0.168086	0	0	0	1.58043
3	Germany	64.3	42.9	2.84962	0	0	0	0	0.05877	0.130969	0.169013	0.172328
3	Germany	28.3	18.9	0.330021	0.1114	1.76409	2.77179	2.94447	0.01114	0.02368	0.03201	0.032889
3	Germany	71.3	44.28	4.26118	0	0	0	0.168086	0	0	0	1.58043
3	Germany	119	79.38	40.5358	0	0	0	0.0217072	0	0	0	0.0093812
3	Germany	0	0	0.718898	0	0	0	0	0	0	0	0
3	Germany	80	49.68	4.79254	0	0	0	0.0794625	0	0	0	0.74951
3	Germany	0	0	0.432795	0	0	0	0	0	0	0	0
3	Germany	0	0	1.76489	0	0	0	0	0	0	0	0
3	Germany	0	0	1.0743	0	0	0	0	0	0	0	0
3	Germany	55.5	37.02	11.0282	0	0	0	0.189859	0	0	0	0.310375
3	Germany	0	0	1.10175	0	0	0	0	0	0	0	0
3	Germany	0	0	1.01121	0	0	0	0	0	0	0	0
3	Germany	0	0	0.705792	0	0	0	0	0	0	0	0
3	Germany	57.4	38.28	10.9106	0	0	0	7.18376	0	0	0	62.8469
3	Germany	98.6	65.7	31.7221	0	0	0	0.139539	0	0	0	0.0588005
3	Germany	80	53.34	17.1558	0	0	0	0.184055	0	0	0	0.249965
3	Germany	55.3	36.9	0	0	0	0	0.295803	0	0	0	0.311941
3	Germany	65.8	43.86	0	0	0	0	0.21072	0	0	0	0.33908
3	Germany	0	0	0.751681	0	0	0	0	0	0	0	0
3	Germany	53.1	35.4	0	0	0	0	0.285496	0	0	0	0.451856
3	Germany	0	0	1.34036	0	0	0	0	0	0	0	0
3	Germany	98.6	65.7	31.7221	0	0	0	0.474434	0	0	0	0.199922
3	Germany	0	0	0	23.6651	0	0	0	0	0	0	0
3	Germany	0	0	0	0	0	0	0	0	0	0	0
3	Germany	0	0	0	0	0	0	0	0	0	0	0
3	Germany	75	46.56	4.94619	0	0	0	0.132965	0	0	0	1.25745
3	Germany	82.7	51.36	13.3766	0	0	0	0.065769	0	0	0	0.095923
3	Germany	85	56.64	12.2621	0	0	0	1.03029	0	0	0	1.41183
3	Germany	0	0	0	0	0	0	0	0	0	0	0
3	Germany	75	46.56	25.062	0	0	0	0.0180162	0	0	0	0.0209046
3	Germany	76.6	47.58	23.7235	0	0	0	0.306198	0	0	0	0.382869
3	Germany	0	0	0	0	0	0	0	0	0	0	0
3	Germany	26.4	17.64	8.51351	0	0	0	22.3769	0	0	0	0
3	Germany	73.2	48.84	19.6936	0	0	0	0	0	0	0	0
3	Germany	85	56.64	21.4223	0	0	0	1.47335	0	0	0	0.633166
3	Germany	85	56.64	12.2621	0	0	0	0.114476	0	0	0	0.15687
3	Germany	0	0	0	0	0	0	0	0	0	0	0
3	Germany	13.7	9.18	39.218	0.0175	0.0465845	0.120295	0.155284	6.55e-05	3.9e-05	6.15e-05	6.55e-05
3	Germany	76.6	47.58	23.7235	0	0	0	0.034022	0	0	0	0.042541
3	Germany	0	0	0	0	0	0	0	0	0	0	0
3	Germany	16.3	10.08	41.843	0.004707	0.012146	0.035321	0.048586	7e-05	0.00015	0.00027	0.000299
3	Germany	26.4	17.64	8.51351	0	0	0	2.48632	0	0	0	0
3	Germany	69.9	43.44	14.1837	0	0	0	0.071314	0	0	0	0.098722
3	Germany	85	52.74	12.0064	0	0	0	0.087912	0	0	0	0.13132
3	Germany	85	52.74	12.0064	0	0	0	0.087912	0	0	0	0.13132
3	Germany	46.3	30.9	0.207211	0.03405	0.290281	0.387814	0.397645	0.05142	0.251073	0.305771	0.309346
3	Germany	0	0	0.555243	0	0	0	0	0	0	0	0
3	Germany	0	0	0.827464	2.745e-05	5.43e-05	5.49e-05	5.49e-05	0	0	0	0
3	Germany	50.7	33.84	0.212385	0	0	0	0	0.57046	6.87209	9.54291	9.85432
3	Germany	73.2	48.84	19.6936	0	0	0	0	0	0	0	0
3	Germany	0	0	0.444788	0	0	0	0	0	0	0	0
3	Germany	32.8	21.9	0.185654	0	0	0	0	0.01244	0.09915	0.110359	0.110739
3	Germany	48.7	32.46	0.26542	0.206026	1.59407	2.12775	2.18135	0.0160849	0.0366661	0.047442	0.048392
3	Germany	250	166.68	0.891271	0.000587752	0.0125186	0.0137218	0.0137567	0.000500529	0.000997479	0.00105965	0.001061
3	Germany	23.8	15.9	0.309077	0.017892	0.238425	0.376607	0.400632	0.00454949	0.155922	0.214918	0.221615
3	Germany	0	0	0	0	0	0	0	0	0	0	0
3	Germany	0	0	0.685217	0	0	0	0	0	0	0	0
3	Germany	67.4	41.88	4.22253	0	0	0	0.151295	0	0	0	1.42492
3	Germany	46.5	30.96	0.789184	0	0	0	0	0.00817	0.022373	0.025885	0.026051
3	Germany	126.3	84.24	0.477042	0	0	0	0	0.004194	0.0116012	0.0125913	0.0126166
3	Germany	28.4	18.9	0.58117	0	0	0	0	0.009918	0.027198	0.0294864	0.0295446
3	Germany	49.2	32.76	0.100857	0.2941	2.621	3.78408	3.93891	0	0	0	0
3	Germany	57.1	35.46	12.0604	0	0	0	0.080939	0	0	0	0.092787
3	Germany	62.2	41.46	0.669143	0	0	0	0	0.21326	0.450653	0.625454	0.645795
3	Germany	0	0	1.09774	0	0	0	0	0	0	0	0
3	Germany	49.5	33	0.823733	9.15e-05	0.00012975	0.00017775	0.000183	0.0511525	0.203117	0.269001	0.275413
3	Germany	42.7	28.5	0	0	0	0	0.186869	0	0	0	0.274599
3	Germany	0	0	1.37026	0	0	0	0	0	0	0	0
3	Germany	0	0	0.258818	0	0	0	0	0	0	0	0
3	Germany	71	47.34	17.9849	0	0	0	0	0	0	0	0
3	Germany	0	0	17.4042	0	0	0	0	0	0	0	0
3	Germany	0	0	0	0	0	0	0	0	0	0	0
3	Germany	0	0	35.189	0	0	0	0	0	0	0	0
3	Germany	56.9	37.92	0.768793	0	0	0	0	0.31631	1.64681	2.08272	2.11733
3	Germany	29.7	19.8	0.188904	0	0	0	0	0.011535	0.079383	0.100529	0.102219
3	Germany	90	60	0.382853	0	0	0	0	0.03782	0.290613	0.403182	0.416263
3	Germany	75	46.56	25.062	0	0	0	0.248891	0	0	0	0.288793
3	Germany	86.1	53.46	13.9487	0	0	0	0.076109	0	0	0	0.108551
3	Germany	59	39.36	3.72783	0.041	0.273446	0.464542	0.504606	0	0	0	0
3	Germany	250	166.68	0.757473	0	0	0	0	0.002858	0.007633	0.007888	0.007891
3	Germany	0	0	80.1147	0	0	0	0	0	0	0	0
3	Germany	43.7	29.1	0.356828	0	0	0	0	0.01627	0.045681	0.048416	0.048465
3	Germany	0	0	5.34025	0	0	0	0	0	0	0	0
3	Germany	0	0	2.92899	0.000366	0.000434	0.000688	0.000732	0	0	0	0
3	Germany	39	25.98	0	0	0	0	0.249643	0	0	0	0.314289
3	Germany	0	0	0.27015	0	0	0	0	0	0	0	0
3	Germany	107.9	71.94	0.857022	0.0169	0.052893	0.062519	0.063045	0.000563	0.006431	0.008925	0.009215
3	Germany	0	0	386.478	0	0	0	0	0	0	0	0
3	Germany	0	0	7.74384	0	0	0	0	0	0	0	0
3	Germany	0	0	0.247025	0	0	0	0	0	0	0	0
3	Germany	57.3	38.22	0.340861	0.0750168	0.120693	0.148889	0.150866	0.00285936	0.022356	0.0310152	0.0320215
3	Germany	48.3	32.16	4.7548	0.0104	0.124559	0.198561	0.211751	0.001464	0.002672	0.003475	0.003547
3	Germany	0	0	15.5589	0	0	0	0	0	0	0	0
3	Germany	0	0	0.150242	0	0	0	0	0.08703	0.177095	0.184384	0.184474
3	Germany	0	0	0	0	0	0	0	0	0	0	0
3	Germany	67.4	41.88	4.22253	0	0	0	0.151295	0	0	0	1.42492
3	Germany	56.5	35.04	12.0604	0	0	0	0.080939	0	0	0	0.092786
3	Germany	0	0	5.84517	0	0	0	0	0	0	0	0
3	Germany	121.8	81.24	0.580855	0.000366	0.000675	0.00073	0.000731	0.01827	0.051158	0.054363	0.054424
3	Germany	250	166.68	4.82505	0.0058	0.009206	0.009738	0.009747	0.00029	0.000278	0.00029	0.00029
3	Germany	186.2	124.14	0.161089	0.0243	0.316011	0.426057	0.437554	0	0	0	0
3	Germany	0	0	0.746694	0	0	0	0	0	0	0	0
3	Germany	53.6	35.7	0.297823	0.0262	0.082102	0.102595	0.10413	0.00043	0.000414	0.000431	0.000431
3	Germany	0	0	0.434487	0	0	0	0	0	0	0	0
3	Germany	43.7	29.1	3.8125	0.2205	0.546447	0.986555	1.09289	0.19265	1.02069	1.35052	1.3825
3	Germany	33.9	22.62	18.2253	0.48675	2.43723	4.70079	5.33146	0.004445	0.034026	0.048058	0.049794
3	Germany	0	0	0.289057	0	0	0	0	0	0	0	0
3	Germany	45	30	0.120547	0.1225	1.29067	2.13056	2.29453	0.03716	0.13845	0.173812	0.176521
3	Germany	51.9	34.62	0.10844	0	0	0	0	2.20711	21.257	38.3774	42.5141
3	Germany	0	0	5.41153	0	0	0	0	0	0	0	0
3	Germany	30.4	20.28	0.296758	0.1317	0.319418	0.508995	0.54275	0.01044	0.0732667	0.0994515	0.10226
3	Germany	57.6	38.34	1.98326	0	0	0	0	0.14631	0.582908	0.734463	0.746285
3	Germany	0	0	17.2453	0	0	0	0	0	0	0	0
3	Germany	51	34.02	0.77142	0	0	0	0	0.4406	9.32452	13.0496	13.496
3	Germany	160.4	106.92	1.00232	0.0176	0.035943	0.038928	0.039002	0	0	0	0
3	Germany	52.5	35.04	1.17878	0.0194	0.05326	0.059251	0.059453	0.000511	0.001291	0.001366	0.001367
3	Germany	250	166.68	0.928773	0.0052	0.013482	0.014448	0.014469	0	0	0	0
3	Germany	0	0	12.5867	0.000366	0.00072	0.000732	0.000732	0	0	0	0
3	Germany	69	45.96	4.09382	0	0	0	0	0.02311	0.185264	0.228547	0.23158
3	Germany	0	0	12.8502	0	0	0	0	0	0	0	0
3	Germany	41.2	27.48	0.927363	4.61526e-05	5.68711e-05	8.73873e-05	9.23052e-05	0.0270371	0.182629	0.234957	0.239455
3	Germany	43.8	29.16	1.82715	0	0	0	0	0.00709186	0.0759945	0.105666	0.109141
3	Germany	32.1	21.36	0.889688	0	0	0	0	0.0940315	0.611644	0.806669	0.825324
3	Germany	0	0	32.4424	0	0	0	0	0	0	0	0
3	Germany	0	0	7.9612	0	0	0	0	0	0	0	0
3	Germany	0	0	4.77512	0	0	0	0	0	0	0	0
3	Germany	63.7	42.48	0	0	0	0	0.211116	0	0	0	0.29815
3	Germany	47.2	31.44	0.403801	0	0	0	0	0.07199	0.538615	0.664449	0.673268
3	Germany	0	0	0.738095	0	0	0	0	0	0	0	0
3	Germany	0	0	0.417264	0	0	0	0	0	0	0	0
3	Germany	0	0	5.73368	0	0	0	0	0	0	0	0
3	Germany	86.1	53.46	13.9487	0	0	0	0.076109	0	0	0	0.108551
3	Germany	88.2	54.78	12.5131	0	0	0	0.111517	0	0	0	0.135519
3	Germany	88.2	54.78	12.5131	0	0	0	0.111517	0	0	0	0.135519
3	Germany	73.1	45.36	14.4541	0	0	0	0.066644	0	0	0	0.090177
3	Germany	162.1	100.62	16.6115	0	0	0	0	0	0	0	0.258792
3	Germany	49.2	30.54	16.6377	0	0	0	0.923207	0	0	0	0.685582
3	Germany	88.9	55.14	29.4097	0	0	0	0.177643	0	0	0	0.077738
3	Germany	20.9	13.92	26.0806	0.0213312	0.130868	0.25241	0.286274	0	0	0	0
3	Germany	21.1	14.04	26.0755	0.0205313	0.131853	0.25431	0.28843	0	0	0	0
3	Germany	54.4	36.3	1.85703	0.0437623	0.0811956	0.130488	0.139465	0.00263307	0.0786918	0.109285	0.112853
3	Germany	0	0	0.593696	0	0	0	0	0	0	0	0
3	Germany	80	49.68	4.79254	0	0	0	0.0794625	0	0	0	0.74951
3	Germany	72.4	44.94	4.22309	0	0	0	0.176789	0	0	0	1.66156
3	Germany	77.2	47.94	24.4268	0	0	0	0.30023	0	0	0	0.362349
3	Germany	0	0	0.62871	0	0	0	0	0	0	0	0
3	Germany	13.2	8.82	6.76365	0.0192	0.037548	0.05343	0.055445	0.001034	0.024144	0.032766	0.03369
3	Germany	77.7	48.24	11.0854	0	0	0	0.089574	0	0	0	0.134441
3	Germany	66.4	44.28	0.417204	0.0668033	0.540148	0.856825	0.912523	0.000622031	0.117394	0.168532	0.175215
3	Germany	13.7	9.18	39.218	0.0175	0.0465845	0.120295	0.155284	6.55e-05	3.9e-05	6.15e-05	6.55e-05
3	Germany	0	0	1.19272	0	0	0	0	0	0	0	0
3	Germany	85	56.64	20.6899	0	0	0	0.17582	0	0	0	0.28467
3	Germany	88	58.68	28.0684	0.0049	0.07692	0.137943	0.152466	6.1e-05	4.4e-05	6e-05	6.2e-05
3	Germany	14.5	9	39.6909	0.0185	0.070561	0.164266	0.201598	0.000702	0.002853	0.004478	0.004756
3	Germany	67.6	41.94	12.8283	0	0	0	0.0712	0	0	0	0.097328
3	Germany	70.9	44.04	4.39496	0	0	0	0.140868	0	0	0	1.32821
3	Germany	70.8	43.92	4.4403	0	0	0	0.133043	0	0	0	1.25519
3	Germany	75	46.56	4.02514	0	0	0	0	0	0	0	1.75842
3	Germany	69.4	43.08	4.55735	0	0	0	0.503041	0	0	0	4.56271
3	Germany	69.2	42.96	4.21039	0	0	0	0.691425	0	0	0	6.26621
3	Germany	68.1	42.24	4.15234	0	0	0	0	0	0	0	0.731581
3	Germany	62.2	38.58	12.8325	0	0	0	0.0447738	0	0	0	0.0563838
3	Germany	62.4	38.7	12.7893	0	0	0	0.0455304	0	0	0	0.0575892
3	Germany	60	37.2	12.8526	0	0	0	0.0444432	0	0	0	0.0558756
3	Germany	70.1	43.5	4.40672	0	0	0	0.0832986	0	0	0	0.784878
3	Germany	64.5	40.02	4.45901	0	0	0	0.0779298	0	0	0	0.736628
3	Germany	62.4	38.7	12.7893	0	0	0	0.0455304	0	0	0	0.0575892
3	Germany	64	39.72	4.44452	0	0	0	0.0794208	0	0	0	0.748964
3	Germany	62.4	38.7	12.7893	0	0	0	0.0455304	0	0	0	0.0575892
3	Germany	62.2	38.58	12.8325	0	0	0	0.0447738	0	0	0	0.0563838
3	Germany	64	39.72	4.44452	0	0	0	0.0794208	0	0	0	0.748964
3	Germany	63.3	39.3	12.7756	0	0	0	0.0458052	0	0	0	0.0580746
3	Germany	60	37.2	12.8526	0	0	0	0.0444432	0	0	0	0.0558756
3	Germany	75	46.56	4.66046	0	0	0	0.159403	0	0	0	1.50219
3	Germany	69.9	43.38	4.53705	0	0	0	0.117927	0	0	0	1.11826
3	Germany	66.4	41.22	3.16866	0	0	0	1.34687	0	0	0	12.1997
3	Germany	63.3	39.3	4.32093	0	0	0	0.133058	0	0	0	1.25723
3	Germany	57.1	35.46	12.0604	0	0	0	0.080939	0	0	0	0.092787
3	Germany	58.7	36.42	11.9731	0	0	0	0.083005	0	0	0	0.096037
3	Germany	63.3	39.3	4.32093	0	0	0	0.133058	0	0	0	1.25723
3	Germany	63.8	39.6	12.9817	0	0	0	0.068152	0	0	0	0.092144
3	Germany	69.9	43.38	11.2515	0	0	0	0.097671	0	0	0	0.146157
3	Germany	33.9	22.62	18.2253	0.48675	2.43723	4.70079	5.33146	0.004445	0.034026	0.048058	0.049794
3	Germany	65	40.38	4.49323	0	0	0	0.124439	0	0	0	1.17768
3	Germany	71.8	44.58	5.01024	0	0	0	0.499713	0	0	0	4.5325
3	Germany	61.9	38.4	12.9835	0	0	0	0.071501	0	0	0	0.08915
3	Germany	64.4	39.96	4.4997	0	0	0	0.123465	0	0	0	1.1682
3	Germany	64.4	39.96	4.4997	0	0	0	0.123465	0	0	0	1.1682
3	Germany	65	40.38	4.49323	0	0	0	0.124439	0	0	0	1.17768
3	Germany	63.2	39.18	12.9817	0	0	0	0.068152	0	0	0	0.092144
3	Germany	59.5	36.96	12.952	0	0	0	0.072427	0	0	0	0.090665
3	Germany	59.9	37.14	12.9835	0	0	0	0.071501	0	0	0	0.08915
3	Germany	68.1	42.24	4.15234	0	0	0	0	0	0	0	0.731581
3	Germany	36	24	0	0	0	0	0.320993	0	0	0	0.382147
3	Germany	62.2	38.58	12.8325	0	0	0	0.0298492	0	0	0	0.0375892
3	Germany	62.4	38.7	12.7893	0	0	0	0.0303536	0	0	0	0.0383928
3	Germany	0	0	0.647186	0	0	0	0	0	0	0	0
3	Germany	73.2	48.84	19.6936	0	0	0	0	0	0	0	0
3	Germany	119	79.38	40.5358	0	0	0	0.495357	0	0	0	0.214079
3	Germany	70.8	47.22	15.4488	0	0	0	0.00104473	0	0	0	0.0014196
3	Germany	0	0	0.857959	0	0	0	0	0	0	0	0
3	Germany	39.3	26.16	0.248382	0	0	0	0	0.0679325	0.458134	0.56345	0.570713
3	Germany	69.9	46.56	0.51892	0	0	0	0	0.11104	0.420539	0.586268	0.605861
3	Germany	119.1	79.38	0.167756	0	0	0	0	0.23188	1.64084	2.02703	2.0543
3	Germany	30.2	20.16	3.40424	0.000366	0.000619	0.000726	0.000732	0.05676	0.150672	0.170439	0.171217
3	Germany	42.4	28.26	2.85845	0	0	0	0	0.10912	1.6312	2.279	2.35618
3	Germany	70.4	43.68	4.22541	0	0	0	0.151484	0	0	0	1.42577
3	Germany	80.7	53.76	0.392877	0.1268	0.256527	0.311499	0.315033	0.001413	0.014863	0.020616	0.021283
3	Germany	0	0	0.473996	0	0	0	0	0	0	0	0
3	Germany	60	37.2	12.8526	0	0	0	0.0296288	0	0	0	0.0372504
3	Germany	69.1	46.08	1.19887	0	0	0	0	0.302142	1.85182	2.11994	2.13158
3	Germany	0	0	0	0	0	0	0	0	0	0	0
3	Germany	0	0	0	0	0	0	0	0	0	0	0
3	Germany	0	0	0.999692	0	0	0	0	0	0	0	0
3	Germany	122.7	81.84	0.235122	0	0	0	0	0.181702	0.299078	0.385955	0.393526
3	Germany	0	0	0.785875	0	0	0	0	0	0	0	0
3	Germany	37.3	24.9	2.33832	0	0	0	0	0.0006384	0.0122412	0.0165474	0.0170022
3	Germany	143.1	95.4	0	0	0	0	0.0580795	0	0	0	0.530273
3	Germany	57.1	38.1	0.881093	0	0	0	0	0.05897	0.327376	0.398636	0.403289
3	Germany	48.5	32.34	0.105693	1.098	8.02905	11.1725	11.5418	0.08083	0.388585	0.604465	0.640445
3	Germany	0	0	0.142519	0	0	0	0	0	0	0	0
3	Germany	75.3	50.22	2.71273	0.0259	0.134952	0.176451	0.180279	0.205551	2.08751	2.91459	3.0129
3	Germany	126.3	84.24	0.477042	0	0	0	0	0.037746	0.104411	0.113322	0.113549
3	Germany	28.4	18.9	0.58117	0	0	0	0	0.004959	0.013599	0.0147432	0.0147723
3	Germany	0	0	0.963357	0	0	0	0	0	0	0	0
3	Germany	101.6	63.06	37.6579	0	0	0	0.214607	0	0	0	0.1009
3	Germany	87.8	54.48	13.227	0	0	0	0.067598	0	0	0	0.099964
3	Germany	80	49.68	4.95176	0	0	0	0.132137	0	0	0	1.24941
3	Germany	98.3	61.02	35.6171	0	0	0	0.214141	0	0	0	0.100686
3	Germany	70.1	43.5	4.40672	0	0	0	0.0555324	0	0	0	0.523252
3	Germany	80	49.68	4.88467	0	0	0	0.16646	0	0	0	1.56988
3	Germany	72.3	44.88	4.26118	0	0	0	0.168086	0	0	0	1.58043
3	Germany	59.6	39.72	0.700117	0.0494	0.3887	0.521622	0.535258	0.001014	0.008503	0.011795	0.012178
3	Germany	0	0	0.542233	0	0	0	0	0	0	0	0
3	Germany	61.9	38.4	12.9835	0	0	0	0.071501	0	0	0	0.08915
3	Germany	48.5	32.28	0	0	0	0	0.23148	0	0	0	0.358667
3	Germany	0	0	0.413775	0	0	0	0	0	0	0	0
3	Germany	64.5	40.02	4.45901	0	0	0	0.0519532	0	0	0	0.491086
3	Germany	0	0	35.963	0	0	0	0	0	0	0	0
3	Germany	0	0	0.445445	0	0	0	0	0	0	0	0
3	Germany	42.7	28.5	0.768921	0.041452	0.075687	0.137344	0.152413	0.04498	0.122114	0.135258	0.135683
3	Germany	0	0	0.802059	0	0	0	0	0	0	0	0
3	Germany	75	46.56	10.5564	0	0	0	0.084556	0	0	0	0.132825
3	Germany	24.7	16.5	0.161238	0	0	0	0	0.015786	0.090514	0.107735	0.108718
3	Germany	68.3	42.42	4.22253	0	0	0	0.151295	0	0	0	1.42492
3	Germany	0	0	35.963	0	0	0	0	0	0	0	0
3	Germany	0	0	56.4263	0	0	0	0	0	0	0	0
3	Germany	62.4	38.7	12.7893	0	0	0	0.0303536	0	0	0	0.0383928
3	Germany	30.4	20.28	0.764574	8.3625	63.7237	96.4023	163.938	0.094109	0.218279	0.279287	0.284402
3	Germany	64	39.72	4.44452	0	0	0	0.0529472	0	0	0	0.49931
3	Germany	0	0	83.4536	0	0	0	0	0	0	0	0
3	Germany	0	0	6.34783	0	0	0	0	0	0	0	0
3	Germany	61.9	38.4	12.9835	0	0	0	0.071501	0	0	0	0.08915
3	Germany	0	0	0.656388	0	0	0	0	0	0	0	0
3	Germany	0	0	0.684618	0	0	0	0	0	0	0	0
3	Germany	53.6	35.7	0.32007	0	0	0	0	0.04494	1.41198	1.95935	2.02301
3	Germany	69.4	46.26	0.179987	0	0	0	0	0.08452	2.86869	3.98097	4.11036
3	Germany	0	0	0.288649	0	0	0	0	0	0	0	0
3	Germany	62.4	38.7	12.7893	0	0	0	0.0303536	0	0	0	0.0383928
3	Germany	216.9	144.6	0	0	0	0	0.126537	0	0	0	1.22115
3	Germany	39.6	26.4	0.0552111	0	0	0	0.643907	0	0	0	0.852855
3	Germany	23	15.36	0.763287	0	0	0	0	0.43854	3.18466	4.21475	4.3147
3	Germany	39.3	26.22	0.476244	0.000183	0.000254	0.0003545	0.0003665	1.13845	4.90655	6.67179	6.86231
3	Germany	78	52.02	0.30789	0.00116	0.003216	0.003716	0.003739	0.001166	0.005086	0.005775	0.005803
3	Germany	52.9	35.28	3.36283	0	0	0	0	0.02447	0.05805	0.07228	0.073327
3	Germany	45	30	0.441637	0	0	0	0	0.02474	0.894112	1.24115	1.28156
3	Germany	0	0	1.34594	0	0	0	0	0	0	0	0
3	Germany	0	0	3.38369	0	0	0	0	0	0	0	0
3	Germany	49.7	33.12	0.365662	0	0	0	0	0.05598	2.0228	2.80831	2.89982
3	Germany	86.6	57.72	1.16174	0.000366	0.000592	0.000723	0.000732	0.33547	0.744719	1.03434	1.06812
3	Germany	78	52.02	0.167947	0	0	0	0	0.10111	1.28402	1.78197	1.8399
3	Germany	62.2	38.58	12.8325	0	0	0	0.0298492	0	0	0	0.0375892
3	Germany	64.3	42.9	2.84962	0	0	0	0	0.05877	0.130969	0.169013	0.172328
3	Germany	0	0	0	0	0	0	0	0	0	0	0
3	Germany	37.1	24.72	0.470915	0	0	0	0	4.32548	26.5422	35.1627	35.52
3	Germany	35.4	23.64	1.07958	0.001285	0.002022	0.003428	0.003721	0.41867	2.88151	3.8857	3.99068
3	Germany	64	39.72	4.44452	0	0	0	0.0529472	0	0	0	0.49931
3	Germany	36.4	24.24	1.88612	0.000366	0.000425	0.000685	0.000733	0.11409	2.44316	3.39896	3.51113
3	Germany	63.3	39.3	12.7756	0	0	0	0.0305368	0	0	0	0.0387164
3	Germany	32.2	21.48	2.07955	0.000366	0.000488	0.000703	0.000732	0.68182	1.43319	1.99987	2.06709
3	Germany	65	40.32	4.22316	0	0	0	0.151182	0	0	0	1.42383
3	Germany	0	0	43.4021	0	0	0	0	0	0	0	0
3	Germany	0	0	2.4989	0	0	0	0	0	0	0	0
3	Germany	0	0	4.95165	0	0	0	0	0	0	0	0
3	Germany	0	0	0	0	0	0	0	0	0	0	0
3	Germany	60	37.2	12.8526	0	0	0	0.0296288	0	0	0	0.0372504
3	Germany	27	16.74	20.1212	0.001292	0.136933	0.240677	0.264257	0.16749	1.20348	1.95299	2.09303
3	Germany	62.8	38.94	12.9687	0	0	0	0.071974	0	0	0	0.08996
3	Germany	65.4	40.62	12.9521	0	0	0	0.068984	0	0	0	0.093678
3	Germany	60.2	40.14	9.57784	0	0	0	0	0	0	0	0
3	Germany	0	0	0	0	0	0	0	0	0	0	0
3	Germany	0	0	0	0	0	0	0	0	0	0	0
3	Germany	75	46.56	4.61839	0	0	0	5.59238	0	0	0	2.80803
3	Germany	106.6	71.04	34.5867	0	0	0	0.760424	0	0	0	0.324023
3	Germany	0	0	0	0	0	0	0	0	0	0	0
3	Germany	116	77.34	36.2411	0	0	0	0.426094	0	0	0	0.179373
3	Germany	0	0	0	0	0	0	0	0	0	0	0
3	Germany	0	0	0	0	0	0	0	0	0	0	0
3	Germany	57.8	38.58	11.089	0	0	0	12.8221	0	0	0	5.77786
3	Germany	68.3	42.42	4.54513	0	0	0	5.46946	0	0	0	2.74706
3	Germany	62.3	38.7	4.9454	0	0	0	4.50703	0	0	0	2.26028
3	Germany	0	0	0	0	0	0	0	0	0	0	0
3	Germany	105.3	70.2	18.9483	0	0	0	0.720991	0	0	0	0.358079
3	Germany	66.3	44.22	4.94616	0	0	0	4.50465	0	0	0	2.25908
3	Germany	0	0	0	0	0	0	0	0	0	0	0
3	Germany	0	0	0	0	0	0	0	0	0	0	0
3	Germany	80	49.68	8.10225	0	0	0	20.1382	0	0	0	10.2105
3	Germany	96.6	64.44	35.9554	0	0	0	0.638184	0	0	0	0.268975
3	Germany	0	0	0	0	0	0	0	0	0	0	0
3	Germany	0	0	0	0	0	0	0	0	0	0	0
3	Germany	54.2	33.6	4.97251	0	0	0	4.83047	0	0	0	2.4222
3	Germany	30.5	20.34	13.6	0	0	0	727.756	0	0	0	80.8618
3	Germany	50	31.08	5.43858	0	0	0	3.97566	0	0	0	1.99076
3	Germany	0	0	0	0	0	0	0	0	0	0	0
3	Germany	34.8	23.22	13.6	0	0	0	561.423	0	0	0	62.3803
3	Germany	51	31.68	5.57052	0	0	0	3.90413	0	0	0	1.95431
3	Germany	42.7	28.44	11.2853	0	0	0	10.8363	0	0	0	4.81667
3	Germany	250	166.68	13.6	0	0	0	679.274	0	0	0	75.4749
3	Germany	80	53.34	19.5199	0	0	0	1.09442	0	0	0	0.566547
3	Germany	133	88.68	27.9533	0	0	0	0.080129	0	0	0	0.036281
3	Germany	48.5	32.34	5.57146	0	0	0	3.90207	0	0	0	1.95328
3	Germany	35.4	23.58	15.7	0	0	0	7.30276	0	0	0	1.82569
3	Germany	149.3	99.54	27.8746	0	0	0	0.081964	0	0	0	0.037467
3	Germany	64.9	40.26	8.64623	0	0	0	17.9825	0	0	0	9.08938
3	Germany	16.3	10.86	5.8	0	0	0	5.34917	0	0	0	1.33729
3	Germany	88.3	58.86	37.6201	0	0	0	0.706946	0	0	0	0.296943
3	Germany	78.1	52.08	19.3626	0	0	0	1.16481	0	0	0	0.594771
3	Germany	107.8	71.88	25.8498	0	0	0	0.162864	0	0	0	0.078051
3	Germany	30.5	20.34	13.6	0	0	0	320.801	0	0	0	35.6446
3	Germany	33.7	22.5	5.8	0	0	0	1.35687	0	0	0	0.339218
3	Germany	47.2	31.44	13.1	0	0	0	320.033	0	0	0	16.8438
3	Germany	93.4	62.28	25.1683	0	0	0	0.230648	0	0	0	0.11196
3	Germany	104.1	69.42	40.1233	0	0	0	1.57988	0	0	0	2.83308
3	Germany	44.8	29.88	15.7	0	0	0	33.3352	0	0	0	8.3338
3	Germany	48.5	30.12	2.96533	0	0	0	16.987	0	0	0	8.58059
3	Germany	43.4	26.94	6.32433	0	0	0	3.47203	0	0	0	1.80813
3	Germany	41.2	27.48	12.3546	0	0	0	9.9776	0	0	0	4.39143
3	Germany	37.6	23.34	5.72399	0	0	0	4.25789	0	0	0	2.13012
3	Germany	41.5	25.74	6.40011	0	0	0	3.52945	0	0	0	1.7706
3	Germany	250	166.68	13.6	0	0	0	16.8418	0	0	0	1.87131
3	Germany	80	53.34	24.5836	0	0	0	0.405516	0	0	0	0.199879
3	Germany	38.7	25.8	6.40129	0	0	0	3.5276	0	0	0	1.7693
3	Germany	80	53.34	24.3644	0	0	0	0.415334	0	0	0	0.204524
3	Germany	46.3	28.74	3.08011	0	0	0	16.304	0	0	0	8.22838
3	Germany	57.2	35.52	18.0784	0	0	0	1.86453	0	0	0	0.932515
3	Germany	37.9	23.52	6.6041	0	0	0	3.45614	0	0	0	1.73256
3	Germany	48.5	32.34	9.32021	0	0	0	1.38149	0	0	0	0.684943
3	Germany	43.4	26.94	6.28204	0	0	0	3.84384	0	0	0	2.04171
3	Germany	160.1	106.74	103.462	0	0	0	2.63118	0	0	0	4.72086
3	Germany	66.8	44.52	32.0232	0	0	0	0.634612	0	0	0	0.273902
3	Germany	148.5	99	89.4572	0	0	0	0.374489	0	0	0	0.224363
3	Germany	41.5	27.66	7.06069	0	0	0	3.3534	0	0	0	1.68022
3	Germany	41.6	25.8	3.20266	0	0	0	15.4896	0	0	0	7.80186
3	Germany	58.7	39.12	18.2373	0	0	0	3.01193	0	0	0	5.71002
3	Germany	63.9	42.6	62.7065	0	0	0	8.43231	0	0	0	3.60074
3	Germany	69.2	46.08	34.2623	0	0	0	0.615269	0	0	0	0.261027
3	Germany	47.9	31.92	11.4146	0	0	0	1.34255	0	0	0	0.67208
3	Germany	39.6	26.4	8.33067	0	0	0	3.02861	0	0	0	1.50716
3	Germany	133.3	88.86	86.35	0	0	0	0.339835	0	0	0	0.19121
3	Germany	38	23.64	7.17252	0	0	0	3.54592	0	0	0	1.77659
3	Germany	50.3	31.2	11.7819	0	0	0	2.96637	0	0	0	1.45614
3	Germany	40.1	26.76	8.68005	0	0	0	2.96728	0	0	0	1.45325
3	Germany	30	18.66	8.69445	0	0	0	2.7547	0	0	0	1.41631
3	Germany	144.5	96.3	118.416	0	0	0	0.293458	0	0	0	0.169285
3	Germany	42.8	26.52	9.36627	0	0	0	2.82624	0	0	0	1.3526
3	Germany	51.9	32.22	12.0387	0	0	0	3.21418	0	0	0	1.59608
3	Germany	40.2	24.96	6.00666	0	0	0	12.4794	0	0	0	6.30267
3	Germany	61.3	40.92	26.5842	0	0	0	3.57702	0	0	0	6.78171
3	Germany	59.8	39.9	21.9985	0	0	0	1.2414	0	0	0	0.640834
3	Germany	35.5	23.64	13.8101	0	0	0	2.7806	0	0	0	1.30554
3	Germany	53.9	33.42	14.2124	0	0	0	2.70396	0	0	0	1.25097
3	Germany	45.2	28.08	11.3156	0	0	0	3.01314	0	0	0	1.55371
3	Germany	51	34.02	28.6743	0	0	0	6.63705	0	0	0	2.75489
3	Germany	55.1	34.2	15.0363	0	0	0	2.91917	0	0	0	1.40029
3	Germany	61.6	38.22	20.8899	0	0	0	2.25935	0	0	0	1.1279
3	Germany	53.5	35.7	21.4285	0	0	0	2.17926	0	0	0	1.07012
3	Germany	64.2	42.78	33.8388	0	0	0	3.52553	0	0	0	6.68774
3	Germany	80	53.34	63.249	0	0	0	0.593635	0	0	0	0.256502
3	Germany	55.2	36.78	22.411	0	0	0	2.05662	0	0	0	1.01611
3	Germany	52.6	32.64	18.8708	0	0	0	2.28698	0	0	0	1.13783
3	Germany	75	49.98	34.8349	0	0	0	3.40543	0	0	0	6.54211
3	Germany	48.3	29.94	17.0951	0	0	0	3.10962	0	0	0	1.48743
3	Germany	44.3	29.52	22.623	0	0	0	4.64742	0	0	0	1.8966
3	Germany	80	53.34	69.4825	0	0	0	0.558888	0	0	0	0.232028
3	Germany	51.4	31.92	20.0455	0	0	0	2.65043	0	0	0	1.3389
3	Germany	53.5	35.64	34.8954	0	0	0	4.41745	0	0	0	1.85715
3	Germany	75	49.98	40.6887	0	0	0	2.88535	0	0	0	5.49088
3	Germany	55.2	34.26	30.1414	0	0	0	1.80954	0	0	0	0.912207
3	Germany	80	53.34	42.6235	0	0	0	2.56503	0	0	0	4.92772
3	Germany	61.2	40.8	48.6775	0	0	0	0.549015	0	0	0	0.185165
3	Germany	51.2	34.14	45.7566	0	0	0	3.4561	0	0	0	1.45669
3	Germany	54.2	33.66	35.7559	0	0	0	1.96497	0	0	0	0.99149
3	Germany	80	53.34	72.0758	0	0	0	1.43948	0	0	0	2.86322
3	Germany	80	53.34	66.7332	0	0	0	1.1847	0	0	0	2.23912
4	Greece	0	0	0	0	0	0	0	0	0	0	0
4	Greece	61.4	40.98	19.471	0	0	0	6.20383	0	0	0	0.0178028
4	Greece	61.5	40.98	19.4996	0	0	0	6.20447	0	0	0	0.0178048
4	Greece	61.4	40.98	19.471	0	0	0	6.20383	0	0	0	0.0178028
4	Greece	0	0	0	0	0	0	0	0	0	0	0
4	Greece	61.5	40.98	19.4996	0	0	0	6.20447	0	0	0	0.0178048
4	Greece	0	0	0	0	0	0	0	0	0	0	0
4	Greece	0	0	0	0	0	0	0	0	0	0	0
4	Greece	115.4	71.64	17.7938	0	0	0	0.112008	0	0	0	0.0956736
4	Greece	129.9	86.58	11.8729	0	0	0	0.262161	0	0	0	0.25157
4	Greece	77.9	48.36	13.0402	0	0	0	6.48261	0	0	0	0.023582
4	Greece	0	0	0	0	0	0	0	0	0	0	0
4	Greece	50.7	31.5	15.3933	0	0	0	11.5881	0	0	0	0.0334187
4	Greece	0	0	0	0	0	0	0	0	0	0	0
4	Greece	58.7	39.12	24.1973	0	0	0	3.42105	0	0	0	0.00746525
4	Greece	58.1	36.06	19.4893	0	0	0	17.5784	0	0	0	0.050935
4	Greece	50.7	31.5	15.3933	0	0	0	11.5881	0	0	0	0.0334187
4	Greece	77.9	48.36	13.0402	0	0	0	6.48261	0	0	0	0.023582
4	Greece	58.7	39.12	24.1973	0	0	0	3.42173	0	0	0	0.00746675
4	Greece	61.4	40.98	19.471	0	0	0	3.10191	0	0	0	0.0089014
4	Greece	61.5	40.98	19.4996	0	0	0	3.10224	0	0	0	0.0089024
4	Greece	47.8	31.86	21.2437	0	0	0	1.55194	0	0	0	0.00387855
4	Greece	47.8	31.86	21.2437	0	0	0	0.273872	0	0	0	0.00068445
4	Greece	115.4	71.64	17.7938	0	0	0	0.074672	0	0	0	0.0637824
4	Greece	50.7	31.5	15.3933	0	0	0	23.1761	0	0	0	0.0668375
4	Greece	0	0	0	0	0	0	0	0	0	0	0
4	Greece	22.4	14.94	12.7646	0	4.32634	14.7619	15.2695	0	0	0	0
4	Greece	0	0	111.289	0	0	0	0	0	0	0	0
4	Greece	129.9	86.58	11.8729	0	0	0	0.174774	0	0	0	0.167713
4	Greece	19.4	12.96	5.67073	0	0	0	13.6273	0	0	0	0.108044
4	Greece	0	0	1.73493	0	0	0	0	0	0	0	0
4	Greece	51.8	34.5	23.1514	0	0	0	1.53944	0	0	0	0
4	Greece	50.6	33.72	3.91154	0.26	2.12771	2.8137	2.88005	0	0	0	0
4	Greece	74.6	49.68	1.25687	1.22	4.42257	4.84109	4.84127	0	0	0	0
4	Greece	54.5	36.3	30.962	0	0	0	1.13513	0	0	0	0.001865
4	Greece	0	0	0	3.08461	0	0	0	0	0	0	0
4	Greece	0	0	0	0	0	0	0	0	0	0	0
4	Greece	0	0	0	0	0	0	0	0	0	0	0
4	Greece	0	0	0	0	0	0	0	0	0	0	0
4	Greece	0	0	0	0	0	0	0	0	0	0	0
4	Greece	0	0	0	0	0	0	0	0	0	0	0
4	Greece	0	0	0	0	0	0	0	0	0	0	0
4	Greece	0	0	0	0	0	0	0	0	0	0	0
4	Greece	0	0	0	0	0	0	0	0	0	0	0
4	Greece	0	0	0	0	0	0	0	0	0	0	0
4	Greece	0	0	0	0	0	0	0	0	0	0	0
4	Greece	0	0	0	0	0	0	0	0	0	0	0
4	Greece	0	0	0	0	0	0	0	0	0	0	0
4	Greece	0	0	0	0	0	0	0	0	0	0	0
4	Greece	0	0	0	0	0	0	0	0	0	0	0
4	Greece	0	0	0	0	0	0	0	0	0	0	0
4	Greece	174.7	108.42	108.277	0	0	0	0.283861	0	0	0	0.640618
4	Greece	114	75.96	59.624	0	0	0	0.293459	0	0	0	0.56614
4	Greece	99	66	53.0669	0	0	0	3.88094	0	0	0	7.61556
4	Greece	105.7	65.64	65.1593	0	0	0	0.937524	0	0	0	1.79703
4	Greece	105.3	70.14	63.4018	0	0	0	0.572409	0	0	0	1.09714
4	Greece	95.5	63.66	59.0405	0	0	0	5.91746	0	0	0	11.6441
4	Greece	105.4	70.26	62.1752	0	0	0	0.543024	0	0	0	1.04403
4	Greece	104.6	64.92	70.8265	0	0	0	0.788348	0	0	0	1.50191
4	Greece	93.8	62.52	58.5035	0	0	0	5.08606	0	0	0	9.75393
4	Greece	105.4	70.26	75.6264	0	0	0	0.426067	0	0	0	0.816938
4	Greece	104.7	64.98	81.815	0	0	0	0.583934	0	0	0	1.11622
4	Greece	97.2	64.8	74.0121	0	0	0	3.6801	0	0	0	7.19111
4	Greece	108.4	72.3	85.3687	0	0	0	0.321674	0	0	0	0.644625
4	Greece	97	64.68	71.9366	0	0	0	3.26592	0	0	0	6.38258
4	Greece	109	72.72	79.9223	0	0	0	0.306792	0	0	0	0.607318
4	Greece	103.8	64.44	88.7718	0	0	0	0.458383	0	0	0	0.880219
4	Greece	96.1	64.02	73.9361	0	0	0	2.89875	0	0	0	5.65444
4	Greece	105.7	65.58	83.7443	0	0	0	0.431267	0	0	0	0.822502
4	Greece	80	53.34	49.4423	0	0	0	0.265021	0	0	0	0.505941
4	Greece	80	53.34	46.8046	0	0	0	0.253065	0	0	0	0.478783
4	Greece	106.1	65.88	98.8123	0	0	0	0.403514	0	0	0	0.814833
4	Greece	80	53.34	50.6788	0	0	0	0.266773	0	0	0	0.498507
4	Greece	105.5	65.52	94.7738	0	0	0	0.420942	0	0	0	0.840864
4	Greece	80	53.34	59.4069	0	0	0	0.304317	0	0	0	0.548445
4	Greece	121.6	81.12	212.082	0	0	0	0.302739	0	0	0	0.571184
5	Spain	0	0	0	0	0	0	0	0	0	0	0
5	Spain	250	166.68	1.73342	0	0	0	0.03478	0	0	0	0
5	Spain	0	0	0	0	0	0	0	0	0	0	0
5	Spain	72.8	48.54	6.63288	0	0	0	0.0067286	0	0	0	0.0566656
5	Spain	0	0	13.7054	0	0	0	0	0	0	0	0
5	Spain	101.3	67.5	10.5432	0.0114	0.0318428	0.0347934	0.0348755	0	0	0	0
5	Spain	59.4	39.6	0.960572	0.0141975	0.13241	0.152379	0.153282	0	0	0	0
5	Spain	159.2	106.14	20.7581	0.008659	0.0126827	0.0156457	0.0158534	0	0	0	0
5	Spain	132.5	88.32	20.7581	0.008659	0.0126827	0.0156457	0.0158534	0	0	0	0
5	Spain	250	166.68	8.51069	0.00378	0.00833805	0.00935265	0.0093897	0	0	0	0
5	Spain	0	0	0.534885	0	0	0	0	0	0	0	0
5	Spain	0	0	0	0	0	0	0	0	0	0	0
5	Spain	0	0	0	0	0	0	0	0	0	0	0
5	Spain	0	0	0	0	0	0	0	0	0	0	0
5	Spain	0	0	0.790597	0	0	0	0	0	0	0	0
5	Spain	0	0	4.48859	0	0	0	0	6e-05	7.72e-05	0.0001084	0.0001122
5	Spain	19.9	13.26	4.31625	0	0	0	0	0.002579	0.0195608	0.0275846	0.028572
5	Spain	19.9	13.26	4.40349	0	0	0	0	0.0007598	0.0057548	0.0080952	0.0083808
5	Spain	0	0	4.66848	0	0	0	0	0	0	0	0
5	Spain	0	0	44.0076	0	0	0	0	0	0	0	0
5	Spain	0	0	13.7054	0	0	0	0	0	0	0	0
5	Spain	68.1	45.36	8.14029	0	0	0	0.0184893	0	0	0	0.149973
5	Spain	100.6	67.08	9.44276	0	0	0	0.0241448	0	0	0	0.184969
5	Spain	63.5	42.36	49.1569	0	0	0	0	0	0	0	0
5	Spain	101.3	67.5	10.5432	0.0114	0.0318428	0.0347934	0.0348755	0	0	0	0
5	Spain	59.4	39.6	0.960572	0.0141975	0.13241	0.152379	0.153282	0	0	0	0
5	Spain	0	0	4.48859	0	0	0	0	0.000237	0.00030494	0.00042818	0.00044319
5	Spain	0	0	90.7072	0	0	0	0	0	0	0	0
5	Spain	64.1	39.78	4.23554	0	0	0	0.053625	0	0	0	0.461013
5	Spain	159.2	106.14	20.7581	0.0211032	0.0309097	0.0381308	0.038637	0	0	0	0
5	Spain	0	0	1.13891	0	0	0	0	0	0	0	0
5	Spain	0	0	3.21697	0	0	0	0	0.0173	0.017084	0.017299	0.0173
5	Spain	132.5	88.32	20.7581	0.0211032	0.0309097	0.0381308	0.038637	0	0	0	0
5	Spain	63.2	42.12	48.7488	0	0	0	0	0	0	0	0
5	Spain	0	0	13.3825	0	0	0	0	0	0	0	0
5	Spain	0	0	285.751	0	0	0	0	0	0	0	0
5	Spain	0	0	12.397	0	0	0	0	0	0	0	0
5	Spain	250	166.68	8.51069	0.001008	0.00222348	0.00249404	0.00250392	0	0	0	0
5	Spain	0	0	54.942	0	0	0	0	0	0	0	0
5	Spain	19.9	13.26	4.31625	0	0	0	0	0.010187	0.0772652	0.108959	0.112859
5	Spain	19.9	13.26	4.40349	0	0	0	0	0.00300121	0.0227315	0.031976	0.0331042
5	Spain	0	0	4.66848	0	0	0	0	0	0	0	0
5	Spain	134.6	83.52	78.319	0	0	0	0.338967	0	0	0	0.0341696
5	Spain	0	0	48.6298	0	0	0	0	0	0	0	0
5	Spain	250	166.68	0	0	0	0	0.03088	0	0	0	0.256345
5	Spain	72.8	48.54	6.63288	0	0	0	0.0121115	0	0	0	0.101998
5	Spain	83.2	51.6	10.9142	0	0	0	0.030268	0	0	0	0.274462
5	Spain	0	0	13.3562	0	0	0	0	0	0	0	0
5	Spain	0	0	4.06443	0	0	0	0	0	0	0	0
5	Spain	0	0	0	0	0	0	0	0	0	0	0
5	Spain	0	0	4.32619	0	0	0	0	0	0	0	0
5	Spain	0	0	4.89813	0	0	0	0	0	0	0	0
5	Spain	0	0	4.48859	0	0	0	0	3e-06	3.86e-06	5.42e-06	5.61e-06
5	Spain	0	0	4.80792	0	0	0	0	0	0	0	0
5	Spain	0	0	4.59146	0	0	0	0	0	0	0	0
5	Spain	19.9	13.26	4.31625	0	0	0	0	0.00012895	0.00097804	0.00137923	0.0014286
5	Spain	19.9	13.26	4.40349	0	0	0	0	3.799e-05	0.00028774	0.00040476	0.00041904
5	Spain	0	0	4.66848	0	0	0	0	0	0	0	0
5	Spain	116.2	77.46	7.9535	0	0	0	0.030531	0	0	0	0.270675
5	Spain	115.8	77.22	7.89599	0	0	0	0.031831	0	0	0	0.279602
5	Spain	0	0	0	0	0	0	0	0	0	0	0
5	Spain	108.5	72.3	7.98256	0	0	0	0.030169	0	0	0	0.266871
5	Spain	108.5	72.3	7.98256	0	0	0	0.030169	0	0	0	0.266871
5	Spain	0	0	0	0	0	0	0	0	0	0	0
5	Spain	0	0	0	0	0	0	0	0	0	0	0
5	Spain	0	0	0	0	0	0	0	0	0	0	0
5	Spain	0	0	0	0	0	0	0	0	0	0	0
5	Spain	0	0	0	0	0	0	0	0	0	0	0
5	Spain	250	155.16	9.26498	0	0	0	0.00742903	0	0	0	0.0535216
5	Spain	21.7	14.46	15.5638	0.000826	0.00276325	0.00550179	0.00631599	0.0190645	0.117278	0.194263	0.209424
5	Spain	0	0	0	0	0	0	0	0	0	0	0
5	Spain	0	0	0	0	0	0	0	0	0	0	0
5	Spain	0	0	0	0	0	0	0	0	0	0	0
5	Spain	0	0	0	0	0	0	0	0	0	0	0
5	Spain	0	0	0	0	0	0	0	0	0	0	0
5	Spain	0	0	0	0	0	0	0	0	0	0	0
5	Spain	0	0	0	0	0	0	0	0	0	0	0
5	Spain	0	0	0	0	0	0	0	0	0	0	0
5	Spain	0	0	0	0	0	0	0	0	0	0	0
5	Spain	0	0	0	0	0	0	0	0	0	0	0
5	Spain	0	0	0	0	0	0	0	0	0	0	0
5	Spain	0	0	0	0	0	0	0	0	0	0	0
5	Spain	0	0	0	0	0	0	0	0	0	0	0
5	Spain	250	166.68	42.2717	0	0	0	0.128951	0	0	0	0.243784
5	Spain	250	166.68	52.3877	0	0	0	0.107688	0	0	0	0.204505
5	Spain	250	166.68	2.5	0	0	0	293.603	0	0	0	73.4007
5	Spain	209.4	139.62	30.871	0	0	0	0.334016	0	0	0	0.673843
5	Spain	250	166.68	32.9105	0	0	0	0.175012	0	0	0	0.351261
5	Spain	204.3	136.2	29.9731	0	0	0	0.43573	0	0	0	0.879018
5	Spain	199.5	133.02	50.5664	0	0	0	3.81878	0	0	0	7.47097
5	Spain	188	125.28	54.4215	0	0	0	0.468786	0	0	0	0.877659
5	Spain	190.7	127.14	53.9026	0	0	0	0.808762	0	0	0	1.51247
5	Spain	180.2	120.12	33.9187	0	0	0	0.708542	0	0	0	1.43007
5	Spain	204.1	136.02	53.1017	0	0	0	5.78655	0	0	0	11.4244
5	Spain	186.4	124.26	63.145	0	0	0	0.535547	0	0	0	1.00143
5	Spain	174.6	116.4	38.1234	0	0	0	0.669665	0	0	0	1.35516
5	Spain	250	166.68	88.0035	0	0	0	0.287028	0	0	0	0.709326
5	Spain	172.2	114.84	60.0539	0	0	0	0.705465	0	0	0	1.32535
5	Spain	193	128.64	70.8802	0	0	0	0.446206	0	0	0	0.831085
5	Spain	156.7	104.46	70.6181	0	0	0	4.55199	0	0	0	8.48932
5	Spain	250	166.68	91.969	0	0	0	0.262079	0	0	0	0.628573
5	Spain	176.4	117.6	58.2548	0	0	0	0.650248	0	0	0	1.21016
5	Spain	159.6	106.44	43.961	0	0	0	0.570751	0	0	0	1.15552
5	Spain	178.8	119.16	63.0401	0	0	0	0.578868	0	0	0	1.08201
5	Spain	198.3	132.18	83.9812	0	0	0	0.337097	0	0	0	0.64966
5	Spain	250	166.68	100.116	0	0	0	0.240619	0	0	0	0.53515
5	Spain	180.4	120.24	62.0204	0	0	0	0.555976	0	0	0	1.02645
5	Spain	156.9	104.58	50.4317	0	0	0	0.428659	0	0	0	0.983731
5	Spain	168.5	112.38	78.3507	0	0	0	3.21149	0	0	0	6.28134
5	Spain	181.9	121.26	66.3037	0	0	0	0.512675	0	0	0	0.959905
5	Spain	250	166.68	99.9201	0	0	0	0.213648	0	0	0	0.473768
5	Spain	184.7	123.12	67.1677	0	0	0	0.492068	0	0	0	0.922728
5	Spain	157.6	105.06	57.4462	0	0	0	0.385354	0	0	0	0.838368
5	Spain	159.7	106.44	57.2281	0	0	0	0.265302	0	0	0	0.48842
5	Spain	178.3	118.86	54.8749	0	0	0	0.22658	0	0	0	0.450699
5	Spain	155.3	103.56	55.2729	0	0	0	0.430153	0	0	0	0.915116
5	Spain	158.4	105.6	100.241	0	0	0	2.65825	0	0	0	5.17442
5	Spain	187.8	125.22	110.785	0	0	0	0.290917	0	0	0	0.527885
5	Spain	170.6	113.76	58.0823	0	0	0	0.252802	0	0	0	0.503372
5	Spain	85	56.64	127.513	0	0	0	0.319464	0	0	0	0.55704
5	Spain	250	166.68	249.16	0	0	0	2.48103	0	0	0	5.76419
5	Spain	80	53.34	254.215	0	0	0	0.314784	0	0	0	0.588507
5	Spain	80	53.34	389.044	0	0	0	0.325377	0	0	0	0.583914
5	Spain	80	53.34	86.2506	0	0	0	0.332305	0	0	0	0.568227
5	Spain	0	0	0	0	0	0	0.197726	0	0	0	0.556572
5	Spain	0	0	0	0	0	0	0.198799	0	0	0	0.553684
5	Spain	0	0	0	0	0	0	0	0	0	0	0
5	Spain	69.8	46.56	49.4766	0	0	0	0	0	0	0	0
5	Spain	0	0	0	0	0	0	0	0	0	0	0
5	Spain	0	0	0	0	0	0	0	0	0	0	0
5	Spain	0	0	0	0	0	0	0	0	0	0	0
5	Spain	0	0	0	0	0	0	0	0	0	0	0
5	Spain	0	0	0	0	0	0	0	0	0	0	0
5	Spain	0	0	0	0	0	0	0	0	0	0	0
5	Spain	202.8	125.88	4.29559	0	0	0	0.003543	0	0	0	0.0324183
5	Spain	0	0	0	0	0	0	0	0	0	0	0
5	Spain	0	0	0	12.7436	0	0	0	0	0	0	0
5	Spain	0	0	0	0	0	0	0	0	0	0	0
5	Spain	0	0	0	0	0	0	0	0	0	0	0
5	Spain	0	0	0	0	0	0	0	0	0	0	0
5	Spain	0	0	0	0	0	0	0	0	0	0	0
5	Spain	0	0	0	0	0	0	0	0	0	0	0
5	Spain	0	0	0	0	0	0	0	0	0	0	0
5	Spain	0	0	0	0	0	0	0	0	0	0	0
5	Spain	0	0	0	0	0	0	0	0	0	0	0
5	Spain	0	0	0	0	0	0	0	0	0	0	0
5	Spain	0	0	0	0	0	0	0	0	0	0	0
5	Spain	0	0	0	0	0	0	0	0	0	0	0
5	Spain	0	0	0	0	0	0	0	0	0	0	0
5	Spain	0	0	0	0	0	0	0	0	0	0	0
5	Spain	0	0	0	0	0	0	0	0	0	0	0
5	Spain	0	0	0	0	0	0	0	0	0	0	0
5	Spain	0	0	0	0	0	0	0	0	0	0	0
5	Spain	0	0	0	0	0	0	0	0	0	0	0
5	Spain	0	0	0	0	0	0	0	0	0	0	0
5	Spain	0	0	0	0	0	0	0	0	0	0	0
5	Spain	0	0	0	0	0	0	0	0	0	0	0
5	Spain	0	0	0	0	0	0	0	0	0	0	0
5	Spain	0	0	0	0	0	0	0	0	0	0	0
5	Spain	0	0	0	0	0	0	0	0	0	0	0
5	Spain	0	0	0	0	0	0	0	0	0	0	0
5	Spain	0	0	0	0	0	0	0	0	0	0	0
5	Spain	0	0	0	0	0	0	0	0	0	0	0
5	Spain	0	0	0	0	0	0	0	0	0	0	0
5	Spain	0	0	0	0	0	0	0	0	0	0	0
5	Spain	0	0	0	0	0	0	0	0	0	0	0
5	Spain	0	0	0	0	0	0	0	0	0	0	0
5	Spain	0	0	0	0	0	0	0	0	0	0	0
5	Spain	0	0	0	0	0	0	0	0	0	0	0
5	Spain	0	0	0	0	0	0	0	0	0	0	0
5	Spain	0	0	0	0	0	0	0	0	0	0	0
5	Spain	0	0	0	0	0	0	0	0	0	0	0
5	Spain	0	0	0	0	0	0	0	0	0	0	0
5	Spain	0	0	0	0	0	0	0	0	0	0	0
5	Spain	0	0	0	0	0	0	0	0	0	0	0
[truncated: 121,165 more rows]

## Sheet: Oil Distributions
Rystad		1	2	3	4	5	6	7	8	9	10	11	12	13	14	15	16	17	18	19	20	21	22	23	24	25	26	27	28	29	30	31	32	33	34	35	36	37	38	39	40	41	42	43	44	45	46	47	48
	$/bbl
	Cost	BE	DK	DE	EL	ES	FR	IE	IT	LX	NL	AT	PT	FI	SW	UK	CZ	EN	CY	LV	LT	HU	MT	PL	SI	SK	BG	RO	NO	CH	IS	HR	TR	MK	US	JA	CA	AU	NZ	RS	RA	CN	IN	MX	BR	AR	CO	LA	KR
1	0	0	21.925	0.0156968	0	1.56504	0.00417582	0	6.3752	0	4.3487	0.00577826	0	0	0	91.8936	0.00433369	0	0	0	0	0.3113	0	0.046084	0	0	0.00153534	0.161779	7.17241	0	0	0.0057822	1.75895	0	17606.7	0.141303	102.658	13.7559	0.0265271	77.4732	0	0.0531647	2.86943	147.419	796.946	26.734	93.1105	2061.76	0
2	0.253364	0	0	0	0	0	0	0	0	0	0	0	0	0	0	0	0	0	0	0	0	0	0	0	0	0	0	0	0	0	0	0	0	0	0	0	0	0	0	0	0	0	0	0	0	0	0	0	0
3	0.506727	0	0	0	0	0	0	0	0	0	0	0	0	0	0	0	0	0	0	0	0	0	0	0	0	0	0	0	0	0	0	0	0	0	0	0	0	0	0	0	0	0	0	0	0	0	0	0	0
4	0.760091	0	0	0	0	0	0	0	0	0	0	0	0	0	0	0	0	0	0	0	0	0	0	0	0	0	0	0	0	0	0	0	0	0	0	0	0	0	0	0	0	0	0	0	0	0	0	0	0
5	1.01345	0	0	0	0	0	0	0	0	0	0	0	0	0	0	0	0	0	0	0	0	0	0	0	0	0	0	0	0	0	0	0	0	0	0	0	0	0	0	0	0	0	0	0	0	0	0	0	0
6	1.26682	0	0	0	0	0	0	0	0	0	0	0	0	0	0	0	0	0	0	0	0	0	0	0	0	0	0	0	0	0	0	0	0	0	0	0	0	0	0	0	0	0	0	0	0	0	0	0	0
7	1.52018	0	0	0	0	0	0	0	0	0	0	0	0	0	0	0	0	0	0	0	0	0	0	0	0	0	0	0	0	0	0	0	0	0	0	0	0	0	0	0	0	0	0	0	0	0	0	0	0
8	1.77355	0	0	0	0	0	0	0	0	0	0	0	0	0	0	0	0	0	0	0	0	0	0	0	0	0	0	0	0	0	0	0	0	0	0	0	0	0	0	0	0	0	0	0	0	0	0	0	0
9	2.02691	0	0	0	0	0	0	0	0	0	0	0	0	0	0	0	0	0	0	0	0	0	0	0	0	0	0	0	0	0	0	0	0	0	0	0	0	0	0	0	0	0	0	0	0	0	0	0	0
10	2.28027	0	0	0	0	0	0	0	0	0	0	0	0	0	0	0	0	0	0	0	0	0	0	0	0	0	0	0	0	0	0	0	0	0	0.449619	0	0	0	0	0	0	0	0	0	0	0	0	0	0
11	2.53364	0	0	0	0	0	0	0	0	0	0	0	0	0	0	0	0	0	0	0	0	0	0	0	0	0	0	0	0	0	0	0	0	0	0.0655856	0	0	0	0	0	0	0	0	0	0	0	0	0	0
12	2.787	0	0	0	0	0	0	0	0	0	0	0	0	0	0	0	0	0	0	0	0	0	0	0	0	0	0	0	0	0	0	0	0	0	0	0	0	0	0	0	0	0	0	0	0	0	0	0	0
13	3.04036	0	0	0	0	0	0	0	0	0	0	0	0	0	0	0	0	0	0	0	0	0	0	0	0	0	0	0	0	0	0	0	0	0	0	0	0	0	0	0	0	0	0	0	0	0	0	0	0
14	3.29373	0	0	0	0	0	0	0	0	0	0	0	0	0	0	0	0	0	0	0	0	0	0	0	0	0	0	0	0	0	0	0	0	0	0	0	0	0	0	0	0	0	0	0	0	0	0	0	0
15	3.54709	0	0	0	0	0	0	0	0	0	0	0	0	0	0	0	0	0	0	0	0	0	0	0	0	0	0	0	0	0	0	0	0	0	0	0	0	0	0	0	0	0	0	0	0	0	0	0	0
16	3.80045	0	0	0	0	0	0	0	0	0	0	0	0	0	0	0	0	0	0	0	0	0	0	0	0	0	0	0	0	0	0	0	0	0	0	0	0	0	0	0	0	0	0	0	0	0	0	0	0
17	4.05382	0	0	0	0	0	0	0	0	0	0	0	0	0	0	0	0	0	0	0	0	0	0	0	0	0	0	0	0	0	0	0	0	0	0	0	0	0	0	0	0	0	0	0	0	0	0	0	0
18	4.30718	0	0	0	0	0	0	0	0	0	0	0	0	0	0	0	0	0	0	0	0	0	0	0	0	0	0	0	0	0	0	0	0	0	0	0	0	0	0	0	0	0	0	0	0	0	0	0	0
19	4.56055	0	0	0	0	0	0	0	0	0	43.0935	0	0	0	0	0	0	0	0	0	0	0	0	0	0	0	0	0	0	0	0	0	0	0	0	0	0	0	0	0	0	0	0	0	0	0	10.559	0	0
20	4.81391	0	0	0	0	0	0	0	0	0	0	0	0	0	0	0	0	0	0	0	0	0	0	0	0	0	0	0	0	0	0	0	0	0	0	0	0	0	0	0	0	0	0	0	0	0	0	0	0
21	5.06727	0	0	0	0	0	0	0	0	0	0	0	0	0	0	0	0	0	0	0	0	0	0	0	0	0	0	0	0	0	0	0	0	0	0	0	0	2.2789	0	0	0	0	0	0	0	0.851665	0	0	0
22	5.32064	0	0	0	0	0	0	0	0	0	0	0	0	0	0	0	0	0	0	0	0	0	0	0	0	0	0	7.0994	0	0	0	0	0	0	0	0	0	0	0	0	0	0	0	0	0	0	0	0	0
23	5.574	0	0	0	0	0	0	0	0	0	1.11143	0	0	0	0	0	0	0	0	0	0	0	0	0	0	0	0	41.891	0	0	0	0	0	0	0	0	0	0	0	0	0	0	0	0	0	0	0	0	0
24	5.82736	0	0	0	0	0	0	0	0	0	0	0	0	0	0	0	0	0	0	0	0	0	0	0	0	0	0	0	0	0	0	0	0	0	0	0	0	0	0	0	0	0	0	0	0	0	7.41056	1.86395	0
25	6.08073	0	0	0	0	0	0	0	0	0	0	0	0	0	0	0	0	0	0	0	0	0	0	0	0	0	0	18.7181	0	0	0	0	0	0	0	19.4701	0	0	0	0	0	0	0	0	0	6.49072	0	0	0
26	6.33409	0	0	0	0	0	0	0	0	0	0	0	0	0	0	0	0	0	0	0	0	0	0	0	0	0	0	0	659.947	0	0	0	0	0	0	0.00482705	0	0	0	0	0	0	0	0	0	2.10547	0	0	0
27	6.58745	0	0	0	0	0	0	0	0	0	0	0	0	0	0	0	0	0	0	0	0	0	0	0	0	0	0	0	475.283	0	0	0	0	0	0	0	0	0	0	19.0667	0	0	0	0	0	0	0	0	0
28	6.84082	0	0	0	0	0	0	0	0	0	0	0	0	0	0	0	0	0	0	0	0	0	0	0	0	0	0	0	0	0	0	0	0	0	0	0	0	0	0	408.748	0	0	0	46.5059	0	0	0	0.941386	0
29	7.09418	0	0	0	0	0	0	0	0	0	0	0	0	0	0	0.500616	0	0	0	0	0	0	0	0	0	0	0	3.28671	0	0	0	0	0.46054	0	0.643399	0	0.159415	0	0	364.863	0	0	0	0	0	18.9146	14.7345	0	0
30	7.34755	0	0	6.69743	0	0	0	0	0	0	0.925212	0	0	0	0	21.6832	0	0	0	0	0	0	0	0	0	0	0	0	150.146	0	0	0	4.77664	0	0	0	146.943	0	0	0	0	0	3.89924	333.199	0	27.9802	22.6404	0	0
31	7.60091	0	0	0	0	0	0	0	0	0	0	0	0	0	0	0	0	0	0	0	0	0	0	0	0	0	0	0	0	0	0	0	0	0	0	0	0.618751	0	0	0	0	0	0	0	0	32.4411	0	0	0
32	7.85427	0	0	0	0	0	0	0	0	0	0	0	0	0	0	0	0	0	0	0	0	0	0	0	0	0	0	0	52.7355	0	0	0	0	0	5.16936	0	0	0	0	2.72399	0	0	0	24.76	0.0393624	39.1251	5.66454	0	0
33	8.10764	0	0	0	0	0	0	0	0	0	0	0	0	0	0	0	0	0	0	0	0	1.35214	0	0	0	0	0	0	0	0	0	0	0	0	0.433188	0	0	0	0	0.161239	0	0	0	60.2651	0	58.4292	0	0	0
34	8.361	0	0	0	0	0	0	0	0	0	0.000742017	0	0	0	0	0	0	0	0	0	0	1.79017	0	0	0	0	0	0	42.8727	0	0	0	0	0	0	0	6.97502	1.55665	0	0	0	0	0	0.439878	1.87896	0	0	0	0
35	8.61436	0	0	0	0	0	0	0	0	0	0	0	0	0	0	0	0	0	0	0	0	0	0	0	0	0	0	0	0	0	0	0	0	0	5.73854	0	27.7719	0	0	1076.5	0	0	0	0	0	0	0	118.803	0
36	8.86773	0	0	0	0	0	0	0	0	0	0	0	0	0	0	0	0	0	0	0	0	0	0	0	0	0	0	0	779.258	0	0	0	0	0	0	7.73553	0	0	0	0	0	0	11.0885	1278.12	0	22.3125	0	105.864	0
37	9.12109	0	0	0	0	0	0	0	0	0	0.252412	0	0	0	0	0	0	0	0	0	0	0	0	0	0	0	0	0	0	0	0	0	0.548113	0	2.43685	0	27.0425	0	0	1.60427	0	0	0	127.46	0	12.9784	0	1719.73	0
38	9.37445	0	0	0	0	0	0	0	0	0	0.00593219	0	0	0	0	0	0	0	0	0	0	0	0	0	0	0	0.143099	0	0	0	0	0	0	0	0	0	81.389	0	0	0	0	0	23.5155	22.3069	0	0	0.670984	0.16515	0
39	9.62782	0	0	0	0	0	0	0	0	0	0	0	0	0	0	0	0	0	0	0	0	0	0	0	0	0	0	0	0	0	0	0	0	0	0	0	0	253.261	0	0	0	0	0	10.8477	0	62.1548	0	78.6801	0
40	9.88118	0	0	0	0	0	0	0	0	0	0	0	0	0	0	17.4422	0	0	0	0	0	0	0	0.0267639	0	0	0	0	0	0	0	0	0	0	0	0	299.3	492.55	0	0.201169	0	91.8277	0	17.8027	0	0.607135	0	0.252049	0
41	10.1345	0	0	0	0	0	0.283281	0	0	0	0.0300793	0	0	0	0	0	0	0	0	0	0	0	0	0	0	0	0	0	0	0	0	0	0.787844	0	0	0	0	73.1499	0	0	0	0	0	90.3647	0	1.83033	0	0.524886	0
42	10.3879	0	0	0	0	0	0	0	0	0	0	0	0	0	0	0	0	0	0	0	0	3.17176	0	0	0	0	0	0.767833	0	0	0	0	18.0153	0	5.09329	0	368.524	0.274668	0	0	0	0	0	28.8697	0	0	0	28.3793	0
43	10.6413	0	0	4.03035	0	0	0.242328	0	0	0	0.187103	0	0	0	0	0	0	0	0	0	0	3.39738	0	0	0	0	0	1.94766	8992.36	0	0	0	1.14148	0	7.91337	0	0	0	0	0	0	6.17102	0	2.41223	0.180417	0	0	98.2941	0
44	10.8946	0	0	0	0	0	0	0	0	0	0.00753068	0	0	0	0	0	0	0	0	0	0	0	0	0.300631	0	0	0.960158	1.60144	275.693	0	0	0	3.59151	0	16.0909	0	0	2.14273	0	493.092	0	0	0	203.241	0	42.7083	0	38.2794	0
45	11.148	0	0	0	0	0	0	0	0	0	0.547928	5.35998	0	0	0	0.24925	0	0	0	0	0	0.569569	0	0.100871	0	0	6.02861	0.4965	0	0	0	0	0.716196	0	10.731	0.00442447	9.5519	1.72699	0	0	0	125.667	1.1335	120.705	1314.27	0	0	0	0
46	11.4014	0	0	0	0	0	0	0	0	0	0.0086437	0	0	0	0	0	0	0	0	0	0	0	0	0	0	0	0	0.984383	0	0	0	0	0	0	422.311	0	14.0486	1.3765	0	0	0	0	7.62786	24.8863	15.4499	7.13219	0	208.895	0
47	11.6547	0	0	0	0	0	0	0	7.57821	0	0	0	0	0	0	0	0	0	0	0	0	1.18521	0	0	0	0	0	2.87374	83.2892	0	0	1.5434	0	0	18.3962	0	24.9011	87.8003	0	2.69616	0	103.644	0.23921	5.43594	12.2722	0	0	0.240765	0
48	11.9081	0	0	0	0	0	0	0	0	0	0.0146864	1.19346	0	0	0	4.11597	0	0	0	0	0	0	0	0	0	0	7.26993	2.22778	0	0	0	0	0	0	276.597	0	0.861233	8.46367	0	0.688449	23.466	16.6927	1.27495	2772.02	13.6283	4.12695	0	8.66855	0
49	12.1615	0	0	0	0	0	0	0	0	0	18.2153	0	0	0	0	42.4048	0	0	0	0	0	1.90881	0	0.842394	0	0	0	0.00288913	0	0	0	0	0	0	8.08563	0	155.29	312.704	0	4863.2	0.423084	0	0	3084.91	23.9681	5.41153	0	103.318	0
50	12.4148	0	0	0	0	0	0	0	0	0	0	0	0	0	0	0	0	0	0	0	0	0.171962	0	0	0	0	0	0	80.2001	0	0	0	0	0	2.04439	0	0	0	0	1.11955	0	0	684.378	168.975	0	11.9718	0	422.821	0
51	12.6682	0	0	0	0	0	0	0	801.787	0	0	0	0	0	0	213.639	0	0	0	0	0	0	0	0	0	0	0	0	57.9792	0	0	0.479051	0	0	764.473	0	107.303	1.06877	0	3082.24	13.0113	30.9713	0	36.0467	0	3.68937	0	2.3793	0
52	12.9215	0	0	0	0	0	0	0	0	0	0	0	0	0	0	0	0	0	0	0	0	0	0	0	0	0	0	0.408038	0	0	0	0	0	0	35.0158	0	1613.38	1.38062	0	0	10.679	0	0	230.237	0	1.7004	0	6.8304	0
53	13.1749	0	0	0.218836	0	0	0	0	0	0	1.10838	0	0	0	0	0.00183925	0	0	0	0	0	0.00288913	0	0	0	0	0	0	197.911	0	0	14.1949	187.32	0	2.98597	0	0	6.72919	0	0	0	194.731	1.38947	155.291	0	0.834255	11.9608	48.4694	0
54	13.4283	0	0	0	0	0	0	0	0	0	0.149362	3.37372	0	0	0	0	0	0	0	0	0	5.85618	0	0	0	0	0	0	811.283	0	0	0.196034	0	0	1023.73	0	36.4066	1.02016	0	15.1795	0	0	0	2073.78	2.71364	71.5989	0	8.97643	0
55	13.6816	0	0	1.22578	0	0	0.355805	0	0	0	0.171382	0	0	0	0	0	0	0	0	0	0	0.969922	0	0.0032404	0	0	0	0	0	0	0	0	9.87974	0	22.6475	0	54.5292	24.1035	0	63.236	2.18668	0.670676	67.3014	5616.18	4.15717	0	466.882	101.105	0
56	13.935	0	0	0	0	0	0	0	0	0	1.69669	0	0	0	0	0	0	0	0	0	0	0	0	0	0	0	0	0	103.545	0	0	0	0.508435	0	2795.49	0	40.5977	648.315	0	0	0	0	6786.42	136.23	0	0	0	2.67178	0
57	14.1884	0	0	0	0	0	0	0	0	0	0.00240761	0	0	0	0	0	0	0	0	0	0	0	0	0	0	0.0258403	0	1.64651	167.441	0	0	0	0	0	1414.29	0	10.4805	57.6348	0	1024.09	0	30.3284	0	1148.79	53.064	2.24016	0	924.788	0
58	14.4417	0	0	0.795686	0	0	0	0	0	0	0.0466681	0	0	0	0	108.601	0	0	0	0	0	1.3676	0	0	0	0	0	0	0	0	0	0	0	0	243.021	0	16.9718	1.65209	0	0	0	1.57691	443.878	5.62273	0	1.88047	0	27.0075	0
59	14.6951	0	0	0	0	0	0	0	0	0	1.20043	0	0	0	0	485.436	0	0	0	0	0	1.43417	0	2.54257	0	0	0	0	80.528	0	0	0	0	0	19.9409	0	273.788	70.4861	0	394.036	0	0	0	10.921	0	1.27226	0	294.355	0
60	14.9485	0	0	0	0	0	0	0	0	0	0	0	0	0	0	115.217	0	0	0	0	0	0	0	0	0	0	0	174.111	1921.89	0	0	0	0	0	485.206	0	0.589264	31.196	0	1959.67	0	66.3319	66.6791	521.692	13.2604	4.01127	0	523.766	0
61	15.2018	0	0	0	0	0	0	0	0	0	0.730598	0	0	0	0	680.834	0	0	0	0	0	0	0	0	0	0	0	0	363.289	0	0	0	0	0	575.769	0	2.13784	82.0887	0	445.339	0	0	0	0	0	3.66384	0	535.581	0
62	15.4552	0	0	0	0	0	0	0	0	0	1.25591	0	0	0	0	228.614	0	0	0	0	0	1.66438	0	0	0	0	0	0	35.1902	0	0	0	0	0	437.555	0	190.335	8.9273	0	4.07989	0	760.434	35.1256	2515.22	6.52972	0	0	9.11443	0
63	15.7085	0	0	0	0	0	0	0	0	0	1.27234	3.19442	0	0	0	0	0	0	0	0	0	0	0	0	0	0	0	93.3713	768.41	0	0	0	0	0	51.2825	0	9.43491	0	0	252.916	0	40.5139	0	278.985	0	3.54633	0	1063.05	0
64	15.9619	0	0	0	0	0	0	0	0	0	1.26144	0	0	0	0	180.265	0	0	0	0	0	0	0	0	0	0	0	0	171.251	0	0	0	0	0	364.392	21.0936	32.0631	1532.73	0	2303.73	0	591.352	126.454	3.94915	3230.77	10.7033	4.86144	214.929	0
65	16.2153	0	0	21.3044	0	0	0	0	0	0	0.296724	0	0	0	0	85.6251	0.406286	0	0	0	0	13.0194	0	0	0	0	0	0	756.25	0	0	0	0	0	482.576	0	123.947	11.86	0	2176.52	0	0	0	9.12154	0	0	0	0.190225	0
66	16.4686	0	0	0	0	0	0	0	0	0	0.0599099	0	0	0	0	988.603	0	0	0	0	0	2.94373	0	0	0	0	0	1.29976	556.835	0	0	1.39351	0	0	297.704	0	32.7739	13.1694	0	2332.49	0	437.593	0	263.025	6197.25	30.605	0	203.082	0
67	16.722	0	0	0	0	0	0	0	0.000418371	0	4.47647	0	0	0	0	60.0359	0	0	0	0	0	0	0	0	0	0	0	0	0	0	0	0	0	0	391.531	0	327.03	0.504046	0	0.251804	0	165.843	5.61088	0	0	55.5823	0	348.798	0
68	16.9754	0	18.2437	0	0	0	0	0	0	0	0	1053.83	0	0	0	237.355	0	0	0	0	0	81.4404	0	171.552	0	0	0	0	0	0	0	0	0	0	2176.18	0	44.4199	141.111	0	4197.11	0	793.634	376.803	795.123	39.7037	2.10448	2.38007	0	0
69	17.2287	0	0	0	0	0	0	0	0	0	0.0100133	0	0	0	0	27.2869	0	0	0	0	0	0.00288913	0	0	0	0	0	1.86758	0	0	0	0	0	0	3224.49	0	19.2886	21.0201	0	5.71696	0	2611.69	337.442	110.536	0	8.2732	35.8504	50.6141	0
70	17.4821	0	0	1.14428	0	0	0	0	367.443	0	0.729572	0	0	0	0	257.587	0	0	0	0	0	3.51434	0	0.633757	0	0	0	37.0126	345.028	0	0	0	0	0	968.828	0	169.739	211.567	0	0	0	914.935	363.718	67.4026	0.00309042	0.256532	15.6482	326.7	0
71	17.7355	0	0	0	0	0	0	0	0.00293254	0	0	0	0	0	0	56.5005	0	0	0	0	0	0	0	0	0	0	0	0.998391	914.98	0	0	0	0	0	841.038	0	133.769	0	0	1365.23	0	2156.17	98.5842	1009.82	0	0	0	171.935	0
72	17.9888	0	0	0	0	0	0	0	0	0	0.218824	0	0	0	0	0	0	0	0	0	7.53505	0	0	0	0	0	0	13.7903	2474.75	0	0	0	0	0	4924.5	0	2.02647	238.164	0	1402.17	0	1523.47	122.341	0	9.19033	182.096	0.153321	18.9258	0
73	18.2422	0	0	0	0	0	0	0	0	0	2.08977	0	0	0	0	91.8911	0	0	0	0	0	1.2336	0	0	0	0	0	25.9862	0	0	0	0	0	0	163.19	0	365.79	8.07789	0	578.836	1.24065	1982.46	45.7492	117.473	10.8234	21.9547	0	171.493	0
74	18.4955	0	0	0	0	0	0	0	0	0	1.1433	0	0	0	0	1.33407	0	0	0	0	0	2.50968	0	0	0	0	0	56.1864	0	0	0	0	0	0	1751.92	0	56.2553	3.79698	0	0.44583	0	1785.41	983.646	76.58	9.82265	83.9967	0	17.724	0
75	18.7489	0	0	0	0	0	0	0	0	0	0.112044	0	0	0	0	54.4934	0	0	0	0	0	0.0443828	0	0	0	0	0	23.3077	4091.31	0	0	0	0	0	81.4051	0	150.393	39.6617	0	66.9217	0	4780.17	0	51.8897	0	61.3525	62.696	133.46	0
76	19.0023	0	0	0	0	0	0	0	0	0	0	0	0	0	0	191.462	0	0	0	0	0	0.0470628	0	0	0	0	0	0	7.16872	0	0	4.825	0	0	1131.1	0	1647.42	93.7881	0	47.6953	0	1008.92	81.8128	3.3054	2421.79	0	0.154928	123.818	0
77	19.2556	0	17.8696	0	53.7856	0	0	0	0	0	0.898412	0	0	0	0	712.935	0	0	0	0	0	0	0	0	0	0	0	0	0	0	0	0	0	0	1451.68	0	572.26	0	0	106.79	0	1709.21	15.333	527.48	1.87393	0.295891	35.347	104.171	0
78	19.509	0	0	0	0	0	0	0	0.12887	0	0.0729386	0	0	0	0	0.0932573	0	0	0	0	0	0.0397452	0	0	0	0	0	0	46.7832	0	0	0	0	0	72.7177	0	0.998158	116.784	0	3201.96	0	1819.31	0	0	551.398	0	0	66.4492	0
79	19.7624	0	0	0	0	0	0	0	0.000197345	0	0.312381	0	0	0	0	312.205	0	0	0	0	0	5.59866	0	0	0	0	0	0	107.945	0	0	0	1.79806	0	116.041	0	28.1571	465.357	0	1544.6	0	258.808	139.969	35.8031	3100.54	1.05922	2.82664	1955.52	0
80	20.0157	0	0	0.00288913	0	0	2.80165	0	0	0	0	0	0	0	0	15.8473	0	0	0	0	0	0.173435	0	118.679	0	0	0	0	0	0	0	0	0	0	780.518	0	0	17.1853	0	27.2426	8.78324	417.954	63.5078	226.59	0	17.0115	12.4154	1840.55	0
81	20.2691	0	0	0	0	0	0	0	0	0	0.0696509	0	0	0	0	149.056	0	0	0	0	0	5.19579	0	0	0	0	0	0	0	0	0	0	0	0	377.708	0	2722.21	80.4394	0	745.814	15.8046	1806.85	484.742	330.104	2752.18	5.08395	0	57.3046	0
82	20.5225	0	0	0	0	0	0.145858	0	147.596	0	0.150211	0	0	0	0	392.371	0	0	0	0	0	0	0	2.44262	0	0	0	0	251.122	0	0	0	0	0	97.5312	11.8201	3.20454	5244.78	0	2.674	0	0	0	5.94205	847.442	1.31995	0	947.609	0
83	20.7758	0	0	3.39002	0	0	0.473264	0	356.306	0	0	0	0	0	0	1206.78	0	0	0	0	0	30.0386	0	0	0	0	0	27.9683	47.164	0	0	0	0	0	2068.94	0	35.5504	3.64196	0	1883.02	0	4497	160.95	28.246	0	254.931	2.24808	18.7796	0
84	21.0292	0	0	3.41555	0	0	0	0	0	0	0	15.0192	0	0	0	112.493	0	0	0	0	0	0.0235156	0	0	0	0	0	0	0	0	0	0	0	0	864.713	0	894.281	28.3592	0	1142.26	0	4251.78	126.335	7.51178	0	121.045	1.81422	6.5335	0
85	21.2825	0	0	0	0	0	0	0	0	0	0.0437869	1.41452	0	0	0	94.7634	0	0	0	0	0	1.89528	0	0.134712	0	0	0	6.30861	196.232	0	0	0	0	0	270.601	0	17.0689	1625.95	81.91	3482.14	0	0	0.167968	640.799	5152.32	0.433148	16.8062	23.0728	0
86	21.5359	0	0	0	0	0.712245	0	0	0	0	0	0	0	0	0	408.355	0	0	0	0	0	0	0	0	0	0	0	317.849	286.472	0	0	0	0	0	1159.85	0	2721.31	37.5446	0	161.396	0	0.349632	0	0	5787.66	0	73.2893	1011.15	0
87	21.7893	0	0	0	0	0	0	0	371.698	0	0.125121	0	0	0	0	3203.53	0	0	0	0	0	0.930169	0	0.908051	0	0	0	1.63692	141.056	0	0	0	0	0	384.134	0	178.078	0.327438	0	1835.12	60.0794	724.391	277.509	78.3646	1789.77	0.088967	19.7977	285.512	0
88	22.0426	0	0	0	0	0	0	0	0	0	0.166966	0	0	0	0	154.069	0	0	0	0	0	0.0318633	0	0.77566	0	0	0	0	601.207	0	0	0	0	0	839.947	0	241.908	2.80499	0	83.1959	0	207.82	35.8261	487.289	5015.31	19.9576	2.61858	14.1018	0
89	22.296	0	0	0	60.267	0	0	0	0	0	0.877446	0.00288913	0	0	357.664	561.676	0	0	0	0	0	0.122441	0	20.2803	0	0	0	23.5677	67.5618	0	0	0	289.562	0	3321.05	0	332.509	218.909	0	4283.53	64.2534	2102.13	520.182	462.147	0	7.04489	0	165.885	0
90	22.5494	0	0	0	0	0	0	0	0	0	0.0494586	0	0	0	0	51.5435	0	0	0	0	0	0	0	0	0	0	0	7.49179	118.915	0	0	0	0	0	453.549	0	223.049	19.3367	0	289.834	0	32228.8	0	834.651	30.7902	14.8453	3.29816	3.79671	0
91	22.8027	0	0	0	0	0	0	0	0	0	0.425085	0	0	0	0	0	0	0	0	0	0	4.07374	0	0	0	0	0	0	17.6418	0	0	0	0	0	383.195	0	244.842	127.843	0	44.8935	0	49.5556	0	24.4827	0	17.9576	4.69174	103.622	0
92	23.0561	0	0	0	0	0	0	0	0.000734123	0	0.00687155	0	0	0	0	2525.72	0	0	0	0	0	9.77878	0	0	0	0	0	11.0378	2461.85	0	0	6.7521	12.611	0	816.288	0	7.09462	60.8591	0	867.036	0	5074.51	4.70416	116.504	3.12076	1623.54	0	203.81	0
93	23.3095	0	0	0	0	0	0	0	0.262532	0	0.01531	0	0	0	0	82.477	0	0	0	0	0	0.149548	0	0	0	0	0	0	0	0	0	0	3.94693	0	3055.66	0	1154.28	165.74	0	148.49	0	0.116524	39.5511	62.9453	0	0	0.734213	988.044	0
94	23.5628	0	0	3.538	0	0	0	0	0	0	0	0	0	0	0	35.0838	0	0	0	0	0	0	0	0	0	0	0	100.688	1023.79	0	0	16.6833	1.66583	0	301.251	0	22.8266	5.42358	0	3486.71	106.431	517.688	15.8594	234.137	159.997	4.72227	18.9071	379.365	0
95	23.8162	0	0	0	0	0	0	0	0	0	0	0	0	0	0	568.593	0	0	0	0	0	0	0	0	0	0	0	0	2998.21	0	0	0	0	0	58.6936	11.1927	35.5235	0	0	4220.79	0	1133.53	225.188	82.5175	0	2.55575	8.59405	705.274	0
96	24.0695	0	0	0	0	0	0	0	0.0196279	0	13.3918	0	0	0	0	49.912	0	0	0	0	0	0	0	1.23981	0	0.249906	0	0	76.2124	0	0	42.5683	4.41919	0	2810.2	0	11597.3	13.1806	45.0229	424.609	0	9906.43	54.7534	1356.08	106.062	0	42.8604	1755.3	0
97	24.3229	0	0	0	0	0	0	0	0	0	0	0	0	0	0	43.6646	0	0	0	0	0	0	0	0.0374876	0	0	0	0.218133	0	0	0	0	0	0	1218.53	0	10.1034	51.2631	0	369.946	0	195.852	213.573	24.1187	2991.5	24.4849	0	103.56	0
98	24.5763	0	0	0	0	0	0	0	0	0	0.0575615	0	0	0	0	31.9428	0	0	0	0	0	0.503265	0	0	0	0	0	0.13052	142.584	0	0	1.92442	105.365	0	1837.38	0	5487.68	152.939	77.5439	2316.82	0	403.185	152.539	643.73	1619.29	0.85461	23.823	978.326	0
99	24.8296	0	0	0	0	0	0.757058	0	0	0	0.434249	0	0	0	0	0.00168927	0	0	0	0	0	0	0	0	0	0	0	0	136.506	0	0	0	0	0	398.849	0	34.9658	0	0	743.134	0	14.2443	8.97594	1.47659	0.430247	0.158452	31.4636	98.9272	0
100	25.083	0	0	0	0	0	0	0	0	0	0.0691496	0	0	0	0	0	0	0	0	0	0	0	0	0	0	0	0	42.2674	304.42	0	0	0	0	0	203.17	0	1129.88	0.293124	0	372.808	12.8752	150.625	167.388	23.8874	78.7142	118.896	152.204	1852.94	0
101	25.3364	0	0	0	0	0	0	0	0.000931468	0	0.175226	0	0	0	0	0	0	0	0	0	0	0	0	0	0	0	0	0	247.542	0	0	0	0	0	389.036	0	2788.55	13.171	0	935.442	0	38.3245	36.0898	481.462	2122.77	0	0	2.85891	0
102	25.5897	0	0	0	0	0	0	0	0	0	0	0	0	0	0	128.477	0	0	0	0	0	0	0	15.0471	0	0	0	113.445	0	0	0	0	0	0	5606.5	0	481.854	9.29697	0	606.471	0	262.943	8.32232	1180.17	0.0877158	0	138.758	152.241	0
103	25.8431	0	0	0	0	0	1.5056	0	0.0750976	0	0.0611414	0	0	0	0	1417.15	0	0	0	0	0	0	0	0	0	0	0	19.5378	0	0	0	0	0	0	2547.79	0	23.4838	6.67686	0	2005.2	0	778.032	58.1892	2971.46	0.00291281	32.8301	0	0	0
104	26.0965	0	0	0	0	0	0	0	0.00122354	0	0.270678	0	0	0	0	1591.44	0	0	0	0	0	0.283328	0	0	0	0	0	0	187.684	0	0	0	0	0	1256.34	0	957.395	2.69094	0	4245.7	0	493.614	1798.16	617.051	1000.19	430.163	7.87401	0	0
105	26.3498	0	0	98.1323	0	0	0	0	0	0	0.043179	2.30538	0	0	0	1923.24	0	138.051	0	0	0	0	0	0	0	0	0	0.0911851	136.033	0	0	0	0	0	1864.53	0.136669	4387.78	1.58188	0	2277.2	0	289.43	469.096	89.8136	45.6895	204.732	30.5704	592.069	0
106	26.6032	0	0	0	0	0	0	0	0	0	0.0438855	0	0	0	0	88.3776	0	0	0	0	0	0	0	0	0	0	0	8.19787	498.452	0	0	0	0	0	1256.2	0	2675.99	0.103918	0	5868.46	0	19.5793	28.2858	334.406	0	0.602549	223.288	0	0
107	26.8565	0	51.018	1.04299	0	0	0	0	0	0	64.0106	0	0	0	0	353.003	0	0	0	0	0	0.818184	0	0.348992	0	0	0	0	44.4125	0	0	0	0	0	2325.35	2.19973	2070.58	180.199	0	17736.9	0	179.164	57.6144	1.78788	25.9933	0	348.059	76.7585	0
108	27.1099	0	0	0	0	0	0	0	0	0	0.576574	0	0	0	0	12.9032	0	0	0	0	0	0	0	0	0	0	0	0.314544	1723.42	0	0	0	8.56539	0	351.443	2.94226	458.28	302.185	0	1567.45	0	186.053	20.6228	0.60292	0	0	0	61.3181	0
109	27.3633	0	0	0	0	0	0	0	0	0	0	0.00288913	0	0	0	47.5173	0	0	0	0	0	0	0	0.0902458	0	0	0	7.05154	362.674	0	0	0	0.426466	0	1346.77	0	7606.93	15.308	0	5719.03	0	138.262	112.089	19.9458	371.223	0	477.351	658.084	0
110	27.6166	0	0	7.07052	0	0	0	0	0	0	0	0	0	0	0	22.1476	0	0	0	0	0	0	0	0	0	0	0	0.559129	144.727	0	0	0	0	0	7441.9	0	119.112	3.42334	0	2218.31	0	306.376	19.6993	0.416804	36.9245	580.875	0	26.4116	0
111	27.87	0	8.32879	0	0	0	0	0	0.00325619	0	0.12786	0	0	0	0	4.52338	0	0	0	0	0	114.796	0	0	0	0	0	3.23023	371.663	0	0	0	1.05394	0	10948	0	1726.82	33.8362	0	3066.79	0	0	3.61269	425.839	0.149003	2.10386	20.342	47.809	0
112	28.1234	0	0	11.6215	0	0	0	0	0	0	0	0	0	0	0	15.0723	0	0	0	0	0	0	0	0.102158	0	0.0732741	0	0	32.4187	0	0	0	0	0	2078.81	0	883.617	52.1638	0	4988.08	0	3.47458	4.95713	883.841	48.2687	15.2277	6.50902	43.507	0
113	28.3767	0	0	1.22284	0	0	0	0	5.52565e-05	0	1.67449	2.06935	0	0	0	136.044	0	0	0	0	0	0	0	0	0	0	0	0	77.3102	0	0	0	17.8892	0	1832.2	0	6.7498	16.256	0	6475.04	0	156.332	217.354	388.962	2952.96	17.8638	96.5148	218.951	0
114	28.6301	0	0	0	0	0	0	0	0	0	0.452022	0	0	0	0	178.46	0	0	0	0	0	0	0	0.00433764	0	0	0	0	52.2207	0	0	0	0.352864	0	769.774	0	388.501	0.347153	0	376.292	0	0	0	0	1063.51	19.5238	1.62382	245.258	0
115	28.8835	0	11.263	0	0	0	0	0	0	0	0.0227065	0.00289307	0	0	0	1063.84	0	0	0	0	0	0	0	0	0	0.000438105	0	0	0	0	0	0	0.0136128	0	12176.2	0	1782.26	2.1144	0	4794.67	0	1243.39	64.9277	193.193	386.624	1852.77	16.8579	127.198	0
116	29.1368	0	0	0	0	0	0	0	0	0	0	0	0	0	0	644.323	0	0	0	0	0	0	0	0	0	0	0	0	5.3779	0	0	0	0	0	8141.16	0	1304.67	0.00118802	0	113.25	0	137.136	8.51756	297.734	1196.65	35.1856	80.2083	55.7073	0
117	29.3902	0	0	0	0	0	57.5437	0	0	0	0.11296	0.00288913	0	0	0	134.756	0	0	0	0	0	0	0	0	0	0	0	4.57419	0	0	0	0.0298622	0	0	829.345	0	2652.98	2.66653	0	1639.18	0	147.274	467.334	274.114	0	28.3554	0	10596.1	0
118	29.6435	0	0	0	0	0	0	0	9.07786e-05	0	0.0169756	0	0	0	0	71.9127	0	0	0	0	0	0.00289307	0	0	0	0	0	0	529.917	0	0	0	0	0	3789.27	0	84.8239	0.258103	0	1464.35	0	286.939	199.562	0	0	75.0116	27.279	1062.07	0
119	29.8969	0	0	10.8725	0	0	0	0	2.22121	0	0.518468	0	0	0	0	51.1958	0	0	0	0	0	0	0	0	0	0	0	0	437.003	0	0	0	0	0	11402.2	0	4468.86	2.61033	0	3316.35	0	269.855	2.26075	89.643	1187.96	28.2082	7.13445	111.243	0
120	30.1503	0	0	649.905	0	0	58.5493	0	0	0	2.03481	0	0	0	0	361.564	0	0	0	0	0	0	0	0	0	0	0	0	90.4128	0	0	0	4.72193	0	7539.78	26.9039	3691.8	206.839	0	2499.96	0	1851.77	186.795	243.296	1.4339	0	447.021	270.906	0
121	30.4036	0	0	4138.55	0	0	0	0	9.06734	0	0	0	0	0	0	79.4084	0	0	0	0	0	0	0	0	0	0	0	23.2829	558.532	0	0	0	0	0	16556.1	0	4401.2	0	0	1788.59	0	0	0	142.085	3.12199	22.6795	9.4593	14.3647	0
122	30.657	0	301.83	0	0	0	0.172598	0	0	0	1.75959	0	0	0	0	41.5451	0	0	0	0	0	0	0	0	0.772711	0	0	5.67018	792.318	0	0	0	0	0	6855.21	0	943.982	1.09689	77.6732	1228.07	0	587.94	10.5996	0	0.638292	179.224	6.94689	121.267	0
123	30.9104	0	315.749	0	0	0	0	0	0	0	105.148	0	0	0	0	118.103	0	0	0	0	0	0	0	0	0	0	0	0.530869	898.783	0	0	0	0	0	8920.81	0	2536.55	0	38.2797	10233.5	171.267	183.076	0	522.604	1983.48	4938.59	459.285	28.401	0
124	31.1637	0	11.1365	0	0	0	0	0	0.000142088	0	0.0813258	0	0	0	0	132.114	0	0	0	0	0	0	0	7.57898	0	0	0	0.198462	56.8472	0	0	10.4805	0	0	12464	0.0195135	845.985	13.1769	0	6751.61	0	360.804	28.7927	52.1956	215.5	15.1519	321.67	1685.37	0
125	31.4171	0	99.3211	3.93551	0	0	3.27132	0	0.0142443	0	0	0	0	0	0	762.81	0	0	0	0	0	0	0	0	0	0	0	0	0	0	0	0	0	0	4670.47	0	2408.45	65.2599	0	4355.12	0	2026.13	41.5487	0	232.56	0.0670341	109.841	38.2604	0
126	31.6705	0	0	0	0	0	0	0	0	0	0	0.00289307	0	0	0	65.2541	0	0	0	0	0	0	0	4.35427	7.37829	0	0	1.62345	43.0656	0	0	0	0	0	4842.26	0	1898.3	2.26625	0	3121.39	0	100.484	38.5616	2871.45	385.013	84.1892	15.257	2020.27	0
127	31.9238	0	0	0	0	0	0	0	0	0	0.18194	0	0	0	0	156.819	0	0	0	0	0	0	0	0	0	0	0	0	0	0	0	0	0	0	7823.29	0	2910.64	0	0	4586.6	0	93.9419	0	129.738	2.26456	8.38504	31.4432	839.014	0
128	32.1772	0	605.17	3.18365	0	0	0	0	590.035	0	0.0536383	0.734273	0	0	0	1544.73	0	0	0	0	0	0	0	0	0	0	0	9.9	70.7899	0	0	0	0	0	2504.89	0	2095.16	1.02674	0	6266.63	41.3952	51.4007	222.2	1851.02	118.572	16.7265	317.093	732.814	0
129	32.4305	0	169.83	0	0	0	0	0	0	0	0	0	0	0	0	124.929	0	0	275.675	0	0	0.00192214	0	0	0	0	0	55.015	18.0953	0	0	0	0	0	4344.47	0	542.62	0	0	4610.29	0	193.323	428.73	3.95816	4.88331	57.5564	0	9.89715	0
130	32.6839	0	306.857	0	0	0	0.492762	0	0	0	0.380698	0	0	0	0	86.0729	0	0	0	0	0	0	0	0	0	0	0	104.888	0	0	0	0	0.931215	0	14740.3	0	2495.3	633.275	0	952.103	0	15112.4	48.3293	0.00144456	73.716	0	6.28458	123.709	0
131	32.9373	0	216.301	17.6618	0	0	0	0	0	0	0.240425	0.269297	0	0	0	324.834	0	0	0	0	0	0	0	0	0	0	0	0	16.5307	0	0	0	0	0	8137.8	0	1258.94	18.7806	0	634.324	0	2356.34	203.774	2095.48	2797.84	2.5607	0	708.549	0
132	33.1906	0	114.138	0.00288913	0	0	0	0	0	0	0	0	0	0	0	766.803	0	0	0	0	0	0	0	0	0	0	0	5.63813	1964.22	0	0	0.00332329	0	0	401.414	0	2430.09	0.00155508	0	6824.1	0	133.97	0	40.1995	40.1806	4.96355	110.354	50.9865	0
133	33.444	0	0	0	0	0	0	0	0	0	0.689728	0	0	0	0	8.72341	0	0	0	0	0	0.207098	0	0	0	0	0	5.41894	0	0	0	0	1.60837	0	28141.3	0	2064.77	0	0	388.923	0	71.7633	4.19685	33.9506	0	4.42039	193.045	228.747	0
134	33.6974	0	0	47.4409	0	0	0	0	124.921	0	0.00116433	2.20648	0	0	0	172.058	0	0	0	0	6.76888	0	0	0	0	0	0	19.4469	1365.4	0	0	3.15958	0	0	8784.51	0	2553.21	41.3196	0	3366.47	0	3446.83	649.596	7.3114	2166.25	0	17.4722	96.7367	0
135	33.9507	0	216.184	0	0	0	0	0	0	0	0	0	0	0	0	206.349	0	0	0	0	0	0	0	0	0	0	0	78.3819	422.949	0	0	0	0	0	13284.5	0	689.569	2.9824	0	3730.66	0	363.821	322.637	240.282	7.11576	0.177875	8.656	420.435	0
136	34.2041	0	157.244	0	0	0	4.19482	0	0	0	0	0	0	0	0	137.947	21.3327	0	0	0	0	0	0	0	0	0	0	2.12681	0	0	0	0	0	0	6008.96	0	1139.13	1.14127	0	3964.24	0	920.056	0	6.75389	387.903	10.7272	1.45477	1817.03	0
137	34.4575	0	0	0	0	0	2.13741	0	0	0	0	0.230396	0	0	0	80.8957	0	0	0	0	0	0	0	0	0	0	0	9.39955	157.552	0	0	0	2.09153	0	26960.3	0	159.513	0	0	502.42	0	209.552	179.236	0.0589114	4696.12	36.1841	2.32662	65.1585	0
138	34.7108	0	0	2215.88	0	0	7.57884	0	20.2742	0	0	0	0	0	0	356.546	0	0	0	0	0	0	0	0.52219	0	0	0	0	124.574	0	0	0	0	0	8659.24	0	885.904	0	0	299.143	0	0	4.11663	367.463	356.06	68.4942	7.59146	1834.26	0
139	34.9642	0	0	0	0	0	0	0	0	0	0.000142088	10.4921	0	0	0	136.697	0	0	0	0	0	0	0	80.2041	0	0	0	0	256.973	0	0	0	0.601175	0	16342.3	0	675.867	1.00187	0	2431.4	0	1145.98	250.629	142.965	2789.76	380.097	140.066	3272.72	0
140	35.2175	0	0	28.8379	0	0	0	0	0	0	0	0	0	0	0	168.431	0	0	0	0	0	0	0	0.0683563	0	0	0	1.20763	276.567	0	0	0	1.56021	0	23703.9	0	1276.22	0	0	321.463	0	574.969	0	0.977054	55.167	409.402	0	4982.59	0
141	35.4709	0	5.77682	10.9747	0	0	0	0	0	0	0	0	0	0	0	1999.95	0.572142	0	0	0	0	1.68562	0	0	0	0	0	23.2598	125.952	0	0	0	0	0	7747.09	0	2140.41	1.99732	0	601.642	0	380.513	101.064	59.1273	729.877	12.0585	96.2453	8796.84	0
142	35.7243	0	0	0.00288913	0	0	0.0823678	0	5.92034e-05	0	0.676581	0.180057	0	0	0	409.505	0	0	0	0	0	0	0	0	0	0	0	0	320.343	0	0	0	34.3354	0	10249.6	0	40.3483	0	0	4334.06	0	0	0	64.1574	3.63829	0	7.42242	91.4186	0
143	35.9776	0	0	1.26693	0	0	0	0	0	0	0.0158349	0	0	0	0	75.0852	0	0	0	0	2.71874	0	0	0	0	0	0	0	219.61	0	0	0	0	0	19626.6	0	5837.7	784.589	0	8423.36	0	1271.98	69.2285	28.8721	3171.3	565.057	8.33654	0.0217838	0
144	36.231	0	52.2679	0.00289307	0	0	0	0	0	0	0	0	0	0	0	125.009	0	0	0	0	0	0	0	0	0	0	0	78.3819	134.153	0	0	0	0	0	4626.4	0	1216.19	350.334	0	15848	0	469.491	43.4762	224.916	6005.83	35.1607	39.9515	1251.52	0
145	36.4844	0	0	0	0	0	0	0	0	0	107.823	0	0	0	0	223.768	0	0	0	0	0	0.0143351	0	1.32902	0	0	0	0	487.421	0	0	0	12.1226	0	17238.3	0	1935.86	444.646	0	2436.97	0	15002.8	5717.84	2661.88	8467.22	79.8133	0	1172.66	0
146	36.7377	0	0	0	0	0	0	0	0.00163007	0	0	0	0	0	0	1609.91	0	0	0	0	0	0	0	0.116777	0	0	0	0	69.1798	0	0	0	0	0	16612.1	0	17.9439	65.7268	0	2241.24	0	295.809	199.582	1050.3	0	0	14.4147	31.7066	0
147	36.9911	0	0	0	0	0	0	0	0	0	309.112	0	0	0	0	17.889	0	0	0	0	0	0	0	0	0	0	0	0.61585	3060.71	0	0	0	0	0	7580.27	0	2782.42	75.2907	0	13311.7	0	357.428	2650.42	3471.77	50.4237	283.829	434.998	1898.44	0
148	37.2445	0	22.3154	0	0	0	0.388986	0	0	0	0	7.494	0	0	0	99.9363	0	0	0	0	0	0	0	0	0	0	0	44.3356	70.6711	0	0	0	0	0	3012.6	0	3960.4	1.03143	0	924.562	0	466.495	3.54721	0	4218.77	10.984	76.9424	0	0
149	37.4978	0	0	16.8055	0	0	0	0	0	0	0.134692	0.795529	0	0	0	323.947	0	0	0	0	0	0	0	0	0	0	0	0	390.448	0	0	0	0	0	13806.5	0	1394.53	0	0	670.951	6.8231	2474.87	123.323	1383.45	55.5707	74.6675	106.167	1014.04	0
150	37.7512	0	0	27.6364	0	0	712.912	204.938	60.9333	0	0	0.00288913	0	0	0	1339.44	0	0	0	0	0	1.46338	0	0	0	0	0	31.178	1750.92	0	0	0	97.3489	0	21638.4	0	417.037	74.6457	0	1269.88	15.3736	482.768	172.684	108.499	332.216	120.327	43.401	4073.76	0
151	38.0045	0	0	0	0	0	0	0	0	0	1.27146	0	0	0	0	182.539	0	0	0	0	0	0	0	0	0	0	0	22.6394	344.665	0	0	0	0	0	407.974	0	17.125	0	8.97187	1081.24	0	394.794	41.4699	3.74572	5751.96	4.99697	121.312	35.2966	0
152	38.2579	0	23.8847	13.432	0	0	117.39	0	0	0	0.0120104	0	0	0	0	250.427	0.169618	0	0	0	0	0	0	0.0802641	0	0	0	3.59788	165.123	0	0	0	0	0	15913.1	0	5531.87	7.77118	169.529	1282.1	0	1712.94	99.0137	0	6.35748	2.74	155.399	490.325	0
153	38.5113	0	0	13.9231	0	0	0	0	12.9026	0	0.210685	0	0	0	0	330.86	0	0	126.517	0	0	0	0	0	0	0	0	3.33716	565.923	0	0	0	0	0	5794.54	0	517.759	0	0	3379.27	0	350.269	98.9404	8.19479	387.891	89.8221	9.70996	26.2508	0
154	38.7646	0	0	0.985315	0	0	0	0	0	0	0	0	0	0	0	925.088	0	0	0	0	0	4.73637	0	0	0	0	0	0	709.26	0	0	0.234805	113.842	0	2064.76	0	802.903	70.3941	0	12912.5	15.832	370.427	2029.37	2.11016	1.80931	77.3575	27.8424	70.5295	0
155	39.018	0	0	0	0	0	0	0	0	0	0	0	0	0	0	1.7814	0	0	0	0	0	0	0	0.151158	0	0	0	0	299.306	0	0	0	0	0	8878.91	0	938.534	46.1464	0	6047.18	0	92.3675	7.32693	797.204	2813.96	163.78	76.4017	4.02409	0
156	39.2714	0	0	0.00289307	0	0	0	0	0	0	0.180918	0	0	0	0	247.483	0	0	0	0	0	11.4599	0	0.0614255	0	0	0	0.0797628	350.6	0	0	2.7057	0	0	18990.2	0	1565.22	4.27016	0	2964.32	0	504.177	548.609	1490.37	6114.18	6.3642	25.5146	77.3562	0
157	39.5247	0	0	14.495	0	0	0	0	0	0	253.978	0.0542304	0	0	0	368.979	0	0	0	0	0	0.0923692	0	0	0	0	0	12.5871	242.046	0	0	28.6678	0	0	17484.4	0	1195.09	116.059	0	642.467	0	0	134.106	0	3012.53	0	248.262	127.399	0
158	39.7781	0	0	0	0	0	0	0	0	0	587.312	0	0	0	0	170.762	0	0	0	0	0	0.356227	0	0.159798	0	0	0	26.737	375.89	0	0	0	0	0	9630.56	0	6958.53	2.09646	0	7039.65	0	1010.24	60.2779	1.75865	1855.33	73.2132	2.16882	37.8036	0
159	40.0315	0	38.9093	60.9662	0	0	17.4027	0	0.000528884	0	0.221251	0	0	0	0	426.215	0	0	0	0	0	0	0	0	0	0	0	0	43.4042	0	0	0.451501	0	0	15690.5	0	2923.44	0	0	5110.9	0	22.8552	44.4219	1319.33	17.1965	1512.08	82.3712	76.109	0
160	40.2848	0	0	3.15321	0	0	0	0	2.93642	0	0.156846	0	0	0	0	366.374	0	0	0	0	0	0	0	0.280376	0	0	0	0	657.545	0	0	0	0	0	13778.3	0	3175.63	290.302	0	1799.72	0	4.33334	8.11989	779.654	544.942	0	43.8946	2156.71	0
161	40.5382	0	0	0	0	0	0	0	0	0	0.413532	0	0	0	0	59.6276	0	0	0	0	424.304	0	0	0.0619544	0	0	0	1.6133	432.365	0	0	0	0	0	6902.84	0	725.7	0.0989882	0	788.13	0	1716.12	12.7099	227.311	3982.44	1.11878	0	167.748	0
162	40.7915	0	19.8094	0.99283	0	0	0	0	0.977283	0	1.67496	0	0	0	0	211.963	0.242849	0	0	0	0	0	0	11.5289	0	0	0.0819928	0	373.247	0	0	45.8387	70.2164	0	5737.32	0	768.977	36.6578	0	8479.31	0	19.3156	0	380.567	2194.75	0	26.428	4298.12	0
163	41.0449	0	23.4342	39.3835	0	0	10.0456	0	0	0	0	0.176588	0	0	0	167.105	0	0	0	0	0	0	0	23.8596	0	0	0	0.413453	152.304	0	0	0	0.596562	0	6327.53	0	883.979	2.96166	0	2791.98	0	992.12	14.6913	177.167	0	446.464	0	42.4049	0
164	41.2983	0	123.547	27.1659	0	0	0	0	2.64348	0	0.0546724	0	0	0	0	68.7316	0	0	98.4432	0	0	0	0	0	0	0	0	1.64116	306.263	0	0	0	0	0	10577.3	0	648.481	0.968234	0	4216.48	0	383.934	217.442	223.656	196.816	78.4694	5.9121	1612.39	0
165	41.5516	0	0	61.1359	0	0	0	0	7.56063	0	0	0	0	0	0	223.367	0	0	0	0	0	0	0	0	0	0	0	34.2362	573.25	0	0	1.48351	22.8145	0	15696.9	0	11663.6	2.68189	0	3879.84	0	573.863	0	829.828	2960.21	0	11.5745	383.138	0
166	41.805	0	23.2264	0	0	0	0	0	0.32076	0	3.29327	0	0	0	0	0.202618	0	0	0	0	0	0	0	0	0	0	0	30.276	537.892	0	0	1.28792	0	0	4914.58	0	1577.98	3.13659	0	6068.72	0	3688.59	30.2152	1979.54	1531.14	44.0044	21.6837	254.593	0
167	42.0584	0	0	0	0	0	144.442	0	0	0	0.265476	0.213622	0	0	0	484.21	0	0	0	0	0	0	0	0	0	0	0	1.6673	64.2483	0	0	0	0	0	4116.93	0	656.859	195.292	0	3124.27	0	117.04	17.0888	601.924	8571.25	0	15.0632	1323.85	0
168	42.3117	0	0	0	0	0	7.0792	0	0	0	0.0576405	0	0	0	0	98.4543	0	0	0	0	0	0	0	0.157134	0	0	0	0.913142	232.879	0	0	0.00288518	0	0	2652.91	0	2420.01	36.7178	0	5070.2	0	744.018	26.0234	395.665	0	7.67652	5.55678	0.258893	0
169	42.5651	0	33.7147	55.2636	0	0	0	0	45.3619	0	0.808636	2.73648	0	0	0	461.537	0	0	0	0	0	2.97154	0	0.00880947	0	0	0	8.36124	589.177	0	0	0	0	0	11263.8	0	2039.36	0.147192	0.182682	7831.54	16.0604	735.631	118.849	817.025	1949.13	31.028	32.9116	116.156	0
170	42.8185	0	0	0	0	0	0	0	13.867	0	4.38284	0	0	0	0	120.502	0	0	0	0	0	0	0	47.3592	0	0	0	0	221.68	0	0	0	2.09161	0	9411.72	0	351.143	0.0292741	0	12280.8	18.4421	654.404	0	241.183	2954.62	245.551	70.9934	1416.09	0
171	43.0718	0	0	0	0	0	12.4699	0	0	0	2.51009	62.8966	0	0	0	716.622	0	0	0	0	0	0	0	8.80289	0	0	0	7.53265	714.742	0	0	0	0	0	11788.3	0	400.723	237.387	0	2972.5	0	1175.75	167.716	98.1756	272.356	180.071	483.47	364.081	0
172	43.3252	0	0	28.875	0	0	0	0	0	0	2.54082	6.65572	0	0	0	156.484	0.12207	0	0	0	0	0	0	0	0	0	0	3.95075	425.509	0	0	0	0.123305	0	2958.72	0	2833.6	94.2979	81.6342	6320.15	0	657.906	0	199.288	8430.34	30.1144	9.16545	0	0
173	43.5785	0	0	4.31354	0	0	6.08417	0	0	0	4.08465	0	0	0	0	275.048	0	0	0	0	1.34039	0.297051	0	0	0	0	0	0	190.356	0	0	0	2.54956	0	9419.94	1.08384	5073.54	39.5583	38.3687	1068.58	0	925.503	378.191	180.138	8992.26	2.9167	261.157	281.605	0
174	43.8319	0	0	0	0	0	752.732	0	0	0	0.347639	0	0	0	0	245.141	0	0	0	0	0	0	0	0	0	0	0	0	199.406	0	0	0	0	0	7348.68	29.567	819.398	4.1401	0.829038	1942.13	0	1117.27	46.942	555.992	1106.63	122.063	10.3615	88.03	0
175	44.0853	0	19.9498	18.3429	0	0	10.2994	0	0	0	10.6397	0	0	0	0	1605.97	0	0	0	0	0	0.502475	0	0	0	0	0	1.37485	520.485	0	0	7.49599	0	0	10122.4	0	3960.94	112.088	0	1038.34	0	1145.22	0	183.004	1508.47	61.2803	21.491	119.969	0
176	44.3386	0	0	0	0	0	0	0	16.3103	0	2.58329	0	0	0	0	114.263	0	0	0	0	0	0	0	0.135639	0	0	0	0	103.413	0	0	0	0.526623	0	133.827	0	558.815	170.935	0	867.466	0	1020.02	49.6508	386.296	299.208	11.4442	0	325.545	0
177	44.592	0	27.2397	131.57	0	0	0	0	0	0	4.42661	0.684313	0	0	0	43.1358	0	0	0	0	0	0.0425989	0	0	0	0	0	0	245.757	0	0	0	0.00144456	0	5858.86	0	2140.94	119.23	0	3034.01	0	14973	174.737	447.068	4040.11	1651.84	0	6.28664	0
178	44.8454	0	0	9.05915	0	0	1.27666	0	0	0	2.12722	0	0	0	0	53.0192	0	0	0	0	0	19.6757	0	0	0	0	0	0.920511	1486.83	0	0	3.2947	0.0360312	0	10207.1	0	1090.5	998.442	0	3329.82	0	1611.6	0	203.428	3174.42	2.33381	757.255	82.2231	0
179	45.0987	0	19.0681	11.8954	0	0	0	0	0.0178518	0	0.00331934	0	0	0	0	379.176	0.12587	0	0	0	0	0	0	27.329	0	0	0	186.675	280.948	0	0	0	0	0	12915.5	0	434.61	308.377	2.48247	3586.61	0	134.955	738.754	762.4	3316.81	4.11715	21.9423	3.86785	0
180	45.3521	0	0	0	0	0	0	0	0	0	9.59296	0	0	0	0	78.0261	3.33956	0	0	0	0	0	0	0.233787	0	0	0	0.00288913	579.65	0	0	12.6243	26.8465	0	11853.4	0	3023.73	79.689	0.244696	1216.69	0	162.451	22.5344	820.336	6539.13	8.24542	216.056	0	0
181	45.6055	0	0	2.96895	0	0	0	0	0	0	7.45659	0	0	0	0	267.942	0	0	0	0	0	0.62357	0	0.134581	0	0	0	0	32.2959	0	0	0	0	0	10521.2	0	197.61	152.976	0	3013.07	0	48.5228	50.8892	511.795	1998.44	68.3772	57.685	47.7623	0
182	45.8588	0	3.7244	0	0	0	0	0	0	0	20.529	602.05	0	0	0	200.86	0	0	0	0	0	0.021254	0	0.162431	0	0	0	3.44254	300.968	0	0	11.2581	1.23259	0	7705.37	0	541.22	71.1363	0	389.72	0	1042.39	34.2173	2793.27	1348.65	40.7298	2072.12	2889.36	0
183	46.1122	0	157.031	66.4426	0	0	0	83.9454	0	0	21.8438	4.2352	0	0	0	59.8627	0	0	0	0	0	0	0	0	0	0	0	0.830616	149.768	0	0	0	6.36104	0	5993.63	0	262.28	47.7774	0	5730.1	0	1403.22	207.635	91.0517	964.202	211.556	26.6213	8155.04	0
184	46.3655	0	56.2938	0	0	0	0.0655737	0	2.05372	0	5.39331	0	0	0	0	126.88	0	0	0	0	0	0	0	0	0	0.000268389	0	29.4741	566.358	0	0	0	0	0	2343.98	0	2150.61	107.641	0.189325	1872.82	0	27175.1	151.553	259.708	5025.6	39.9451	0	951.457	0
185	46.6189	0	0	0	0	0	0	0	0	0	0.0152113	0	0	0	0	237.825	0	0	0	0	0	0	0	0.49095	0	0.0543409	0	0.734738	277.373	0	0	0.579369	0	0	4767.23	0	2932.01	94.2706	0.415699	1194.46	0	494.015	0.777175	88.8341	13.0214	91.418	0	522.798	0
186	46.8723	0	0	0	0	0	0	0	0	0	1.06032	0	0	0	0	115.898	0	0	0	0	0	0	0	0	0	0	0	1.35002	331.044	0	0	5.12366	0	0	5522.87	0	163.743	3.9164	75.6873	2561.83	0	1566.95	133.839	407.298	719.754	0	76.4697	133.607	0
187	47.1256	0	0	1263.14	0	0	4053.22	0	117.327	0	0.233692	4.32978	0	0	0	23.3947	0	0	0	0	0	0	0	0	0	0	0	1.35259	204.501	0	0	0	5.31169	0	8735.65	0	170.747	65.68	3.47328	529.022	0	557.676	0	612.255	979.521	0	8.42398	765.288	0
188	47.379	0	0	0	0	0	0	0	0	0	1.45504	3.50183	0	0	0	49.8801	0	0	0	0	0	0.00288913	0	1.91347	0	0	0	14.1998	259.667	0	0	28.5433	13.3034	0	9397.93	0	1258.88	149.563	0	575.951	0	699.011	0	154.677	3664.85	82.2493	15.4615	73.8438	0
189	47.6324	0	0	0	7.20629	0	0	0	2.24597	0	140.838	0	0	0	0	67.4753	0	0	0	0	0	0	0	114.306	0	0	0	0	25.1743	0	0	0	0	0	4749.68	0	459.259	2.4323	0	2302.95	0	1042.17	27.3705	50.0487	959.605	12.9749	139.16	618.677	0
190	47.8857	0	37.0798	5.29891	0	0	0.368064	0	4.03336	0	41.3321	0	0	0	0	749.618	0	0	0	0	0	1.15421	0	0	0	0	0	1.28499	466.83	0	0	0	2.41388	0	12739.7	0	1602.98	108.719	3.47854	3002.24	0	1094.26	21.9052	798.904	1913.57	0	4.03193	6.05978	0
191	48.1391	0	3.46662	13.1091	0	0	32.0473	0	3.99608	0	28.8302	0	0	0	0	101.928	0	0	0	0	0	0	0	0	0	0	0	0	115.217	0	0	0	0	0	1955.58	0	2968.72	32.9719	0	1128.78	0	546.446	0	184.641	1211.24	20.7901	0	0.0948834	0
192	48.3925	0	0	134.368	0	0	0	0	112.326	0	0.193856	0	0	0	0	259.405	0	0	0	0	0	0	0	134.64	0	0	0	1.96833	168.119	0	0	0	18.2882	0	2335.24	0	6377.88	0	0.196508	1741.31	0	177.99	23.5772	680.278	970.393	31.2201	3.9011	2333.3	0
193	48.6458	0	0	23.7703	0	0	0	0	2.27667	0	7.81431	3.55386	0	0	0	956.736	0.609034	0	0	0	0	0	0	0	0	0	0	0	134.777	0	0	0	3.89114	0	3331.04	0	6604.55	3.1967	0	5442.34	0	562.926	0	89.8824	3527.65	35.5809	2.12842	185.096	0
194	48.8992	0	73.9435	0.743307	0	0	0	8.54279	0	0	2.14985	0	0	0	0	133.878	17.1286	0	0	0	0	0	0	0	0	0	0	0.443856	100.23	0	0	10.0578	0	0	8317.9	0	260.892	83.7392	0.561829	756.197	0	177.325	26.8634	166.994	1246.07	13.0232	545.104	3089.23	0
195	49.1525	0	98.7176	34.7367	0	0	0	0	59.1428	0	9.9265	0	0	0	0	83.1501	0	0	0	0	0	0.0843649	0	0.972334	0	0	0.248998	42.5712	121.632	0	0	0	0	0	5224.3	0	111.989	7.43081	0	1034.84	0	108.95	0.0450933	980.617	1686.85	22.4087	7.02761	18.6037	0
196	49.4059	0	0	0.00288913	0	0	0	8.13539	0.0045784	0	0	0	0	0	0	103.505	0	0	0	0	0	0	0	0	0	0	0	0	62.5073	0	0	2.89659	0	0	772.202	0	1099.22	98.3938	0	5441.9	0	29.2717	136.907	0	1584.78	44.3169	29.952	1260.22	3.58519
197	49.6593	0	230.772	0	0	0	2.62008	0	8.41449	0	1.45416	0.342074	0	0	0	94.4496	0	0	0	0	0	0	0	0	0	0	0	6.19486	106.367	0	0	0	71.1053	0	2752.13	0	1356.37	261.914	4.71611	2655.24	0	486.113	143.222	327.447	326.684	6.83111	93.242	1677.53	0
198	49.9126	0	4.34633	15.9165	0	0	0	0	4.14432	0	0	0	0	0	0	113.842	0	0	0	0	0	0	0	0	0	0	0	0.811581	371.961	0	0	0	0	0	1316.51	0	2356.65	336.017	3.64764	688.091	0	105.356	109.156	1345.35	600.902	1.15238	170.023	45.9394	0
199	50.166	0	0	12.2197	0	0	0	0	1.5865	0	50.3855	0.679715	0	0	0	67.6017	0	0	0	0	0	0	0	143.295	0	0	0	28.0161	161.544	0	0	0	69.2393	0	3828.39	0	591.563	1332.88	0.155843	2982.74	0	862.205	53.4875	314.709	2661.96	72.1522	117.835	0	0
200	50.4194	0	273.811	0	11.3672	0	2.11882	0	0	0	1.26121	0.684822	0	0	0	47.3099	0	0	0	0	0	0	0	0.172594	0	0	0	0.510768	213.766	0	0	0	76.8423	0	2022.49	0	582.993	287.718	0	549.08	0	446.113	2.52828	291.154	3512.19	93.8279	135.483	158.029	0
201	50.6727	0	134.605	3.71231	182.948	0	0.761301	0	2.85651	0	27.6329	0	0	0	0	92.9889	0	0	0	0	0	0	0	23.2117	0	0	0	10.8809	103.619	0	0	0	4.41108	0	2081.76	0	2311.65	132.652	0	1549.24	0	598.123	0	580.184	741.851	228.703	0	492.417	0
202	50.9261	0	2.97577	41.6078	0	0	0	0	5.6143	0	0.261435	0	0	0	0	40.2872	0	0	0	0	0	0	0	0	0	0	0	0	160.98	0	0	1.79748	0	0	7293.38	0	7132.43	176.801	3.88761	699.439	0	593.279	0	20.3783	747.099	20.2756	29.5657	228.814	0
203	51.1795	0	0	24.1018	0	0	0	0	68.3735	0	0.00917653	0	0	0	0	196.927	0	0	0	0	0	0	0	0	0	0	0	0	111.338	0	0	0	102.789	0	363.855	0	2185.43	238.285	12.8322	1127.11	0	479.294	38.4221	394.462	1297.12	180.803	17.3089	1977.07	0
204	51.4328	0	0	0	0	0	1.15243	0	0.866963	0	16.3877	2.79583	0	0	0	69.1449	0	0	0	0	0	0	0	0.140912	0	0	0	49.8912	32.2086	0	0	3.46741	0	0	904.089	0	495.226	60.2684	3.2816	3106.64	0	237.655	0	0	1103.63	103.439	395.089	11.6599	0
205	51.6862	0	11.9231	12.686	6.07602	0	28.143	67.227	2.07437	0	33.0816	0	0	0	0	84.0367	0	0	0	0	0	2.80752	0	0	0	0	0	0	165.944	0	0	0	1.3925	0	7327.55	0	2613.19	233.687	9.03434	2281.5	0	384.207	132.701	24.0649	1504	77.8694	4.33711	1.97419	0
206	51.9395	0	3.51974	0	0	0	0.511245	0	7.50391	0	0	0	0	0	0	36.6174	0	0	0	0	0	0	0	0	0	0	318.148	2.21917	224.685	0	0	7.1565	31.1085	0	1820.78	0	133.763	104.255	0	5188.59	0	316.312	0	129.288	154.387	146.689	7.1798	163.816	0
207	52.1929	0	0	0	0	0	0	0	3.86163	0	18.1605	0	0	0	0	67.9435	0.708957	0	0	0	0	0	0	0	0	0	0	3.04961	119.679	0.776899	0	0	0	0	2160.18	0	14245.3	237.298	0	2607.27	0	863.813	88.5886	94.0443	2124.53	165.286	0	633.239	0
208	52.4463	0	21.7979	9.26112	0	0	0	0	2.06037	0	0	0	0	0	0	125.513	0	0	0	0	0	2.68245	0	0	0	0	0	0.00288913	175.344	0	0	0	0	0	5526.35	0.60678	1704.18	374.371	2.56167	1489.26	0	139.72	31.0686	92.7297	710.112	4.34035	4.04467	212.298	0
209	52.6996	0	19.8817	2.14777	0	0	1.06637	0	0	0	0.560451	0	0	0	0	74.8898	0	0	0	0	0	0	0	0	0	0	0	0.0843254	94.8566	0	0	1.43774	0	0	3074.22	0	2171.39	83.131	0	3971.45	1.29169	237.988	99.7826	0	1056.59	155.486	26.6792	117.066	0
210	52.953	0	0	1.12682	0	0	0	0	2.04973	0	0	0	0	0	0	67.3475	0	0	0	0	0	0	0	0.16884	0	0	0	1.44945	330.811	0	0	0	0.408488	0	1195.29	8.33723	9338.05	158.8	0	1798.92	0	155.903	98.9621	723.311	1954.34	0.265717	0	9.69679	0
211	53.2064	0	0	0	0	0	0	0	0	0	0	0	0	0	0	11.6107	0	0	0	0	0	0	0	0	0	0	0	1.3407	87.2568	0	0	0	126.267	0	4807.76	0	350.293	4.56609	5.60044	2172.6	0	790.205	4.46462	146.716	321.216	10.0336	37.1271	79.3806	0
212	53.4597	0	0	26.4475	0	0	13.3632	85.7197	36.268	0	13.9558	0	0	0	0	220.16	0	0	0	0	0	1.9464	0	0	0	0	0	0	137.555	0	0	0	1.60006	0	2709.82	0	845.145	45.667	0.301219	505.514	0	308.265	60.266	83.2101	776.344	75.0621	21.1577	263.602	0
213	53.7131	0	0	10.6723	0	0	0	0	8.09031	0	16.5141	0	0	0	0	15.4786	14.921	0	0	0	0	0	0	0	0	0	0	4.87133	22.853	0	0	0	0	0	3616.58	0	1629.81	59.9612	0	589.025	0	7189.87	0	0.416338	921.216	6.21507	14.0492	67.1216	0
214	53.9665	0	0	26.8209	0	0	2.56536	0	6.15895	0	0.0392203	0	0	0	0	29.631	0	0	0	0	0	0	0	0	0	21.6259	0	3.73329	208.438	0	0	13.3065	0	0	566.189	0	2416.29	96.0811	7.93227	1872.81	0	177.26	13.3513	481.427	1045.04	55.3104	8.61839	434.162	0
215	54.2198	0	467.37	1.65153	0	0	0	0	2.05984	0	5.51277	0	0	0	0	9.34324	0	0	0	0	0	0	0	0	0	0	0	0	61.1194	0	0	0	0	0	4462.95	0	3134.03	118.505	8.79393	466.272	0	7418.14	0	698.517	657.813	16.9537	20.1826	7.81681	0
216	54.4732	0	0	0	4.48026	0	0	104.483	21.5708	0	0	0	0	0	0	146.68	0	0	0	47.2865	0	0	0	0	0	39.5443	0	1.49426	56.3788	0	0	0	129.63	0	405.557	0	1204.83	216.711	0	407.453	0	178.937	78.0844	412.329	247.024	92.6643	0	2539.19	0
217	54.7265	0	234.541	0	0	0	0	0	82.9285	0	0	0	0	0	0	20.4519	0	0	0	0	0	1.06806	0	0	0	0	0	0	121.506	0	0	0	0	0	2437.57	0	198.818	183.237	1.06138	282.382	0	239.909	18.9411	631.89	560.275	9.9372	0	2.75431	0
218	54.9799	0	0	26.781	0	0	0	0	0.835487	0	0.155606	0	0	0	0	193.378	2.19307	0	0	0	0	0	0	0	0	0	0	0.00764909	280.484	0	0	0.450913	1.5632	0	1207.45	0	994.547	5.67879	2.02288	1661.81	0	242.492	54.8095	386.14	549.817	70.0142	7.61256	189.189	0
219	55.2333	0	10.9333	1.1675	0	0	0	0	25.8019	0	13.4087	0	0	0	0	23.2176	0	0	0	0	0	2.47557	0	0	0	0.642267	0	99.6169	74.2705	0	0	0	0	0	325.092	0	4599	0.070089	0.483886	2746.7	0	75.3159	82.8778	0	712.066	217.778	0	7.78441	0
220	55.4866	0	0	0.749354	0	0	0	0	0	0	8.47376	0	0	0	0	82.9374	6.19655	0	0	0	0	0	0	0	0	0	0	0.985213	167.246	0.589789	0	0	0	0	2295.33	0.802238	962.906	47.1139	0.302289	470.184	0	324.131	233.016	39.0174	1115.86	30.4997	0	153.618	0
221	55.74	0	0	0	0	0	0	0	2.31562	0	0.075216	0	0	0	0	21.4514	0	0	0	0	0	0	0	0	0	0	0	0	105.747	0	0	0	0	0	1107.42	0	1163.2	342.86	43.53	129.552	0	90.48	1.78904	0	6.65101	0.905311	45.4918	52.1715	0
222	55.9934	0	8.77419	0	0	0	0	0	0	0	26.9232	0	0	0	0	6.32341	3.83119	0	0	0	0	5.14326	0	7.83981	0	0	0	0	58.9024	0.4938	0	0	0	0	2120.23	0	1134.21	123.751	0	203.804	0	346.524	155.698	257.563	599.286	30.2035	32.2606	11991.7	0
223	56.2467	0	250.901	0.319458	0	0	1.20483	0	16.4181	0	0	20.4255	0	0	0	47.036	0	0	0	0	0	0	0	0.0399465	0	0	0	0.185859	85.1915	0	0	0.413516	0	0	501.642	0	4302.12	20.6957	0	1024.26	0	1666.14	10.0581	174.551	2990.17	137.271	23.7188	5.34892	0
224	56.5001	0	8.27788	0	0	0	0	0	1.03304	0	10.651	0	0	0	0	239.775	0	0	0	0	0	0	0	0	0	0	0	0	130.55	0	0	0	0	0	918.94	0	228.479	6.19317	0	654.33	0	403.476	35.4693	57.0653	464.29	40.6063	0.82695	185.114	0
225	56.7535	0	0	0	0	0	0	0	8.16085	0	0	0	0	0	0	35.3108	12.1201	0	0	0	0	8.77762	0	12.3642	0	19.8646	0	4.76311	57.2848	0	0	1.84001	132.509	0	8356.42	0	664.374	83.417	3.05905	609.256	0	375.731	36.0693	886.563	685.595	13.3386	2.05241	24.9973	0
226	57.0068	0	0	7.99801	0	0	0	0	0	0	15.4338	0	0	0	0	72.4737	0	0	0	0	3.7555	0	0	0.108713	0	0	0	2.51779	69.9971	0	0	0	0	0	1831.85	0	2833.18	91.3102	0	2124.05	0	2.20397	165.018	205.745	160.327	3.85828	0	0.567094	0
227	57.2602	0	6.64271	32.3833	0	0.150906	0	3.12739	0.809864	0	0	0	0	0	0	111.843	1.01995	0	0	0	0	0	0	0	0	0	0	0	80.4485	0	0	0	0	0	1938.17	0	560.6	52.7648	52.444	140.122	0	414.192	8.74899	189.896	1278.79	0	4.10176	5.47058	0
228	57.5135	0	0	0	0	0	0	0	4.9591	0	1.45033	0	0	0	0	22.8198	0	0	0	0	0	0	0	0	0	0	0	1.4945	68.1398	0	0	0	9.01478	0	2719.75	0	123.073	207.72	0	432.708	0	115.484	44.5279	76.7052	172.045	0	0	38.6587	0
229	57.7669	0	0	50.6075	0	0	0	0	65.2901	0	13.8357	0	15.2655	0	0	47.2525	0	0	0	0	0	0	0	0	0	0	0	0	126.436	1.27009	0	0	1.00234	0	620.89	0	5242.66	28.6416	0	5027.08	0	653.153	69.8633	1094.64	482.806	5.19502	0	0	0
230	58.0203	0	0	0	69.3803	0	56.9749	0	0	0	0.0686997	3.68277	0	0	0	179.728	0	0	0	0	0	0	0	0	0	0	0	0	115.808	0	0	0	0.854333	0	624.376	0	50.5869	16.9394	0	441.348	0	349.197	0	805.826	74.3711	47.6677	0	1095.45	0
231	58.2736	0	6.89126	0	0	0	19.6258	0	0.0126537	0	0	0	0	0	0	63.0504	0.670471	0	0	0	0	0	0	0	0	0	0	0	117.645	0.535566	0	0	0	0	1573.4	0	9960.53	73.1881	0	56.2447	0	278.17	18.3676	25.8668	428.759	0	7396.89	2993.61	0
232	58.527	0	0	12.2154	27.0078	0	0	0	1.63158	0	13.5226	0	0	0	0	21.6878	0	0	0	0	0	0	0	0	0	0	0	2.1212	140.54	0	0	0	0.0596771	0	455.787	0	261.568	121.195	0	74.9588	0	617.297	180.758	235.357	643.315	0	0	0	0
233	58.7804	0	0	1.99163	0	0	0	0	66.8176	0	14.5586	0	0	0	0	26.9149	0	0	0	0	0	0	0	0	0	0	0	3.3795	92.1153	0	0	0	71.2898	0	39.2984	0	672.826	19.1834	0	417.305	0	298.313	12.0793	0	775.993	87.6169	6.62397	671.709	0
234	59.0337	0	0	0	0	0	0	0	2.72943	0	0	0	0	0	0	44.1929	0	0	0	0	0	0	0	0.336532	0	0	0	0.152599	181.233	0.930706	0	0	8.38552	0	1122.21	0	10.4963	64.0576	1.35059	1145.4	0	325.084	34.8244	791.777	416.663	5.52503	0.330253	31.8442	0
235	59.2871	0	0	0.285862	0	8.06652	9.38251	2.78437	0	0	0.519708	4.76084	0	0	0	66.7878	3.1901	0	0	0	0	0	0	0	0	0	0	0	127.133	0	0	0	3.05139	0	1138.25	0	946.582	114.794	0.155306	31.812	0	409.095	0	21.4748	124.479	0.20353	5.27622	169.021	0
236	59.5405	0	4.23002	2.11261	0	0	0	0	5.4677	0	0	0	0	0	0	20.4985	0	0	0	0	0	3.34003	0	0	0	0	0	0	92.2674	0	0	0	123.051	0	559.008	0	4433.55	34.1385	0	68.5264	0	254.212	24.4085	93.3661	947.358	215.904	825.441	234.004	0
237	59.7938	0	1.92879	5.76658	0	0	35.8785	0	126.619	0	0	0	0	0	0	151.676	0	0	0	0	0	0	0	0	0	0	0	48.5158	23.4382	0	0	0	0.742064	0	852.533	0	72.5476	9.32438	0	43.9772	0	147.662	62.6271	5.05576	250.594	26.8062	42.6224	2066.61	0
238	60.0472	0	6.07807	0	0	0	21.0908	0	0	0	0.298989	0	0	0	0	144.01	2.01701	0	0	0	0	5.53675	0	0	0	0	0	0.375705	90.0312	0	2.00866	0	2.51606	0	765.77	0	293.703	39.763	0	820.014	0	819.444	24.3409	41.4349	233.192	0	774.444	0.829081	0
239	60.3005	0	3.06532	0	0	0	8.76891	0	80.1394	0	0.724563	0	0	0	0	111.306	1.93491	0	0	0	0	0	0	0	0	0	0	3.27718	48.4529	0	0	0	0	0	536.615	0	268.585	14.7236	0	181.67	0	59.9961	12.4122	0	477.177	23.3929	6.67972	0	0
240	60.5539	0	0	0	0	0	19.0034	0	0	0	12.402	0.109957	0	0	0	73.3675	0.483645	0	0	0	0	0	0	0	0	0	0	0.428838	58.4226	0	0	0	3.90102	0	669.625	0	2183.37	31.4027	0	644.911	0	104.984	133.029	34.3335	14.208	41.5131	0	17.0236	0
241	60.8073	0	0	0	0	0	77.157	2.72492	0	0	0	0	0	0	0	368.857	0	0	0	0	0	10.6934	0	0	0	0	0	0.159778	22.3599	0	0	0	0	0	180.481	0	6095.02	1.91465	0	29.2442	0	148.961	7.78263	0	210.056	0	0	6.47769	0
242	61.0606	0	0	16.6742	0	0	22.7078	5.15021	2.99523	0	0	0	0	0	0	186.17	0	0	0	0	0	12.4402	0	0	0	0	0	19.9934	86.0422	0	0	0	1.71785	0	938.846	0	1218.19	22.0875	0	2.24746	0	159.519	168.085	0	390.052	0	0	0	0
243	61.314	0	5.14464	0	122.436	0	0	0	0	0	0	0	0	0	0	56.7197	0	0	0	0	0	0	0	0	0	0	13.5118	0	48.9089	0	0	0	4.86893	0	28.5247	0	2144.02	0	0	52.7152	0	315.533	43.6387	23.5618	287.264	0	20.5543	17.0407	0
244	61.5674	0	0	8.9174	0	0	0	0	2.52922	0	0.00969358	0	0	0	0	37.6567	0.253734	0	0	0	0	8.20873	0	0	0	2.66628	0	3.67085	466.824	0	0	0	0	0	341.572	17.9434	1315.87	23.2486	0	28.5385	0	121.468	64.9353	72.1904	343.811	57.5053	14.9873	15.2273	0
245	61.8207	0	20.9149	0.846621	0	0	0	0	0	0	3.92455	0	0	0	0	38.5638	1.24148	0	0	0	0	0	0	0	0	0	0	11.7849	34.219	0	0	0	3.38425	0	292.032	0	241.416	19.6692	0.0776157	19.929	0	4.30803	0	0	942.599	2.84913	1.03562	4.10053	0
246	62.0741	0	91.6862	18.3779	0	0	82.8274	2.82514	0	0	0	0	0	0	0	177.996	0	0	0	0	0	5.45117	0	0	0	0	0	3.549	38.087	0	0	9.68303	1.05546	0	283.716	0	420.072	0.777274	4.40202	2232.31	0	61.8208	103.036	117.086	99.1419	9.89651	327.926	9.24021	0
247	62.3275	0	1.65012	0.898519	0	0	0	0	0	0	0.00461787	0	0	0	0	28.9571	0	0	0	0	0	5.72373	0	0	0	0	0	0	16.3876	0	0	0	9.87955	0	398.009	0	137.005	25.6124	0	127.729	0	5.96452	28.5916	1214.94	10.7131	1.07463	0	3314.02	0
248	62.5808	0	213.819	0.284074	0	0	0	0	0.66787	0	1.12586	0	0	0	0	77.573	1.93491	0	0	0	0	0	0	0	0	0	0	0	443.863	0	0	0	3.73509	0	851.975	0	1480.35	89.838	0	8.67902	0	154.323	92.2162	54.255	276.226	97.2749	31.3816	525.634	0
249	62.8342	0	9.54877	0	0	0	0	0	0	0	0.20413	0	0	0	0	129.433	0	0	0	0	0	0	0	0	0	0	0	1.13514	13.4232	0	0	0	1.62641	0	127.645	0	1179.74	73.8913	0	150.766	0	464.091	309.939	1024.43	34.3828	2.41226	0	1039.82	0
250	63.0875	0	0	2.7941	0	0	0	0	1.20833	0	0	0	0	0	0	45.555	2.28689	0	0	0	0	0	0	0	0	0	0	0	39.9299	0	0	0	0	0	736.143	0	1405.74	2.78846	0	329.063	0	1245.68	99.1093	0	4.81552	33.8288	32.2402	0	0
251	63.3409	0	96.3944	0	0	0	0	0	69.7512	0	0	0	0	0	0	50.54	0	0	0	0	0	0	0	0	0	0	0	0	148.866	0	0	0	1.56977	0	1512.54	0	107.144	2.36116	0	711.494	0	174.696	21.0587	63.712	232.407	60.9631	0.539509	36.6746	0
252	63.5943	0	39.6122	1.10513	0	0	0	0	1.20833	0	0.368561	0	0	0	0	40.9222	0	0	0	0	5.63168	0	0	0.174682	0	0	0	0	38.7448	0	0	0	2.50711	0	1081.31	0	4142.36	14.5236	0	33.182	0	411.058	54.874	5.08251	821.188	3.10661	4.82557	0	0
253	63.8476	0	67.8824	34.3263	0	0.211652	15.5397	0	3.62538	0	0.886433	1.95418	0	0	0	35.6585	0.427796	0	0	0	0	13.9727	0	0.0663947	0	0	0	1.79231	399.38	0	3.37659	0	1.80457	0	541.847	0	85.8942	56.711	0	4.35355	0	1929.11	75.2992	0	46.6503	86.7608	33.8358	239.54	0
254	64.101	0	0	13.9149	0	0	0	0	87.8157	0	0	0	0	0	0	54.164	0	0	0	0	0	0	0	0	0	0	0	0	19.3738	0	0	12.6983	4.45673	0	29.241	0	1284.06	2.62373	0	56.9555	0	92.5869	20.1974	0	29.5735	170.704	6.74015	39.5808	0
255	64.3544	0	0	1.98785	0	0	0	0	3.6852	0	11.3322	0	0	0	0	86.259	0	0	0	0	0	0	0	1.52756	0	0	0	0	7.91898	0	0	0	0	0	634.49	0	2338.17	3.53722	0	103.172	0	207.652	119.731	5.64537	187.559	14.4006	12.1731	56.861	0
256	64.6077	0	33.1391	0	0	0	0	0	0	0	0.00050915	0	0	0	0	38.5634	0	0	0	0	0	13.2825	0	0	0	0	0	3.63442	494.312	0	0	0	0	0	94.7165	0	5.71583	10.0423	0	6.3258	0	191.018	47.695	0	265.899	0	5.01073	102.036	0
257	64.8611	0	90.165	72.554	0	0	0	0	0	0	0.0382731	0	0	0	0	58.5079	0	0	0	0	0	7.19392	0	0	0	0	0	0	99.3688	0	0	0	0.264975	0	412.664	0	401.043	41.1188	0.6499	696.717	0	231.62	5.38722	907.254	0	87.1485	7.7518	2.27691	0
258	65.1145	0	0	0	0	0	0	0	3.08425	0	0.110182	0	0	0	0	28.5705	0	0	0	0	0	0	0	0	0	0	0	0	144.376	0	0	0	2.50288	0	1099.02	0	99.1906	6.8304	0	41.0059	0	5.99908	0	0	0	8.03296	17.6793	1.41821	0
259	65.3678	0	3.36243	0.272273	0	0	0	0	1.43572	0	1.09502	0	0	0	0	23.0432	0	0	0	0	1.77727	12.3215	0	0	0	0	0	1.37429	23.3656	0	0	0	1.82449	0	370.863	0.579302	1000.46	6.73251	0	1098.48	0	5.9106	71.784	0	8.04259	4.00536	0	68.4588	0
260	65.6212	0	0	0.83169	0	0	0	7.56522	0	0	0	0	0	0	0	45.1391	0.584776	0	0	0	0	0	0	0	0	0	0	0	63.0967	0	0	0	0	0	363.696	0	1430.53	0.286687	1.52596	120.877	0	302.295	28.5844	0	0	0	0	137.631	0
261	65.8745	0	2.73298	0	0	0	0	0	95.9982	0	0.878354	0	0	0	0	25.9778	0	0	0	0	0	0	0	0	0	0	0	14.5627	57.4295	0	0	14.7469	2.64853	0	353.313	1.91994	0.0895353	1.14091	0	82.4432	0	216.203	30.9202	138.563	119.693	0.00695838	31.1678	617.351	0
262	66.1279	0	0	17.7794	0	0	0	0	1.2078	0	0	0	0	0	0	20.8923	0.412802	0	0	0	0	0	0	0	0	0	0	0	14.4025	0.768816	0	0	3.50789	0	47.2784	0	1068.78	1.94368	31.0295	497.467	0	222.34	2.61561	52.6711	0	477.683	58.102	46.1619	0
263	66.3813	0	27.8099	10.7181	0	0	0	0	0	0	0.886489	0	0	0	0	0.980413	0.0575655	0	0	0	0	0	0	0	0	0	0	0	177.674	0	0	0	2.0386	0	1450.19	0	2948.52	6.07846	0	89.9502	0	404.816	56.8241	7.09288	197.254	30.7767	0	2.41561	0
264	66.6346	0	0	3.06862	0	0	0	0	0	0	0.429631	0	0	0	0	24.8368	0	0	0	0	0	0	0	0	0	0	0	0	156.267	0	0	0	4.03398	0	13.3666	0	12.7264	0.344256	0	36.5616	0	5.51175	19.3849	0	2781.37	0.793772	23.5566	714.629	0
265	66.888	0	0	0	0	0	0	0	89.4476	0	0.725155	0	0	0	0	30.5128	0	0	0	0	0	0	0	0	0	0	0	0	147.487	0	0	0	3.29852	0	2280.76	0	1043.86	15.342	0	26.0969	0	36.0519	47.8884	14.146	0	7.37373	0	16.1636	0
266	67.1414	0	0	0	0	0	0.545429	0	2.68058	0	0	0.273279	0	0	0	6.11884	0	0	0	0	0	7.37094	0	0	0	0	0	0	0	0	0	0	2.03868	0	1117.4	0	2368.57	3.27972	0	39.4003	0	9.03244	75.8084	0	118.624	352.609	0	82.9735	0
267	67.3947	0	11.2117	1.47531	0	0	0	7.44889	2.1088	0	0.041549	0	0	0	0	47.5356	0	0	0	0	0	0	0	0	0	0	0	0	7.09231	1.15439	0	0	4.73764	0	443.068	0	638.179	28.4075	7.01098	64.8764	0	36.0828	7.47698	0	0	15.9416	14.601	44.0388	0
268	67.6481	0	0	0	0	0	0	6.982	8.62644	0	0.285408	0	0	0	0	28.1173	0	0	0	0	0	0	0	0	0	0	0	1.83052	46.6	0	0	0	2.70669	0	302.286	0	1531.66	14.9412	16.1661	55.0615	0	152.792	41.632	2.31823	792.544	23.4077	0	37.9606	0
269	67.9015	0	4.70772	0	0	0.131368	51.6464	0	0	0	0.144468	0	0	0	0	2.83063	0.734687	0	0	0	0	0	0	0	0	0	0	0	45.5355	0	0	0	1.30769	0	24.8374	0	6.4844	0.78111	0	858.472	0	6.88658	8.68988	0	10.7549	10.4799	7.98236	3.98509	0
270	68.1548	0	1.18295	22.1846	0	0	26.069	0	0	0	0	0	0	0	0	17.595	0	0	0	0	0	0	0	0	0	0	0	0	1414.04	0	0	0	8.81437	0	63.4335	0	21.6516	14.4036	0	4332.31	0	94.7054	4.64936	5.52976	68.3127	0	0	5.73469	0
271	68.4082	0	0	0	0	0	0	0	2.47558	0	0	0.00288913	0	0	0	15.604	0	0	0	0	0	10.5771	0	0	0	0	0	0	51.4924	1.37987	0	0	0	0	97.0787	0	1366.06	2.75934	0	69.1393	0	10.2707	0	0	0	87.3063	0.260807	1099.73	0
272	68.6615	0	0	0	0	0	0	2.75212	78.8607	0	0	0	0	0	0	104.6	2.5217	0	0	0	0	0	0	0	0	0	0	0	61.9334	0	0	0	5.36342	0	251.886	0	1460.96	2.53345	0	154.515	0	94.5782	32.1339	0	152.691	0	5.6618	0	0
273	68.9149	0	3.95856	0	0	0	12.3267	0	0	0	0	0	0	0	0	5.024	0	0	0	0	0	6.6801	0	0	0	0	2.63267	0	337.681	0	0	0	3.27333	0	818.506	0	2588.02	5.53635	0	29.3103	0	9.20378	3.9247	0	411.848	0.539553	91.0843	44.9561	0
274	69.1683	0	1.11606	7.14284	0	0	51.6723	0	0	0	1.00929	0	0	0	0	23.2658	0.390316	0	0	0	7.96916	0	0	0.114188	0	0	0	0	43.1042	0	4.34513	0	1.19892	0	85.8098	2.64182	361.988	12.9282	0	27.8362	0	818.736	23.4975	78.3657	11.2559	27.3614	0	25.8341	0
275	69.4216	0	0	5.25163	0	0	0	0	21.2842	0	0.561971	0	0	0	0	99.7074	0	0	0	0	0	0	0	0.135379	0	0	0	0	11.5875	0	0	0	1.42367	0	48.4887	0	1.78178	1.03715	1.03501	20.7078	0	1725.65	25.4935	0	0	12.716	0	29.9519	0
276	69.675	0	0	1.13241	0	0	0	0	0	0	0.145558	0	0	0	0	30.9135	0	0	0	0	0	1.02437	0	0	0	0	0	6743.16	5.14641	0	0	0	0.84726	0	630.665	0	1297.47	8.12336	0	60.0259	0	220.712	38.7398	116.628	0	3.73655	7.67412	45.0663	0
277	69.9284	0	0	0.547952	0	0	0	2.68842	0	0	1.24007	0	0	0	0	16.1117	0	0	0	0	0	0	0	0	0	0	0	0	48.2896	0	0	0	4.16769	0	34.3717	0	4.06032	5.02601	0	55.6483	0	168.107	33.5096	239.731	1.83873	6.00115	0	26.7618	0
278	70.1817	0	27.5079	0.597892	0	0	386.081	0	2.05624	0	0.00736885	0	0	0	0	80.7839	2.86105	0	0	0	0	0	0	0.232989	0	0.0438934	0	0	6.07999	0	0	0	0.393865	0	85.0699	0	705.261	2.35619	0	608.821	0	10.4679	9.55903	0	4.23306	2.79682	8.27285	26.9609	0
279	70.4351	0	21.4245	0	0	0	0	0	0	0	8.79166	0	0	0	0	12.6868	2.46272	0	0	0	0	0	0	0	0	0	0	0	9.70931	0	0	0	1.77797	0	93.4742	0	0	1.67355	0	295.153	0	13.5949	4.65528	0	13.0932	11.2531	0	0	0
280	70.6885	0	0	1.96322	0	0	1.87075	10.6171	0	0	0	0	0	0	0	2.42077	0	0	0	0	0.246531	0	0	0	0	0	0	0	67.3733	0	0	0	5.51899	0	175.168	0	687.02	35.2611	5.06685	51.9246	0	4.69834	35.7711	0	8.27802	76.1032	11.6386	0	0
281	70.9418	0	0	0	0	0	0	0	0.465457	0	0.166385	0	0	0	0	2.29942	0	0	0	0	0	5.90142	0	5.4617	0	0	0	0	2.85825	0	0	0	0	0	129.587	0	28.3956	0.748841	0	13.7372	0	5.1507	0	0	31.6539	17.576	16.4937	0	0
282	71.1952	0	20.4663	1.32684	0	0	0	0	0.314098	0	0	0	0	0	0	9.54266	0	0	0	0	0	0.983393	0	0	0	0	0	0	6.52812	0	0	0	7.18382	0	168.862	0	0	4.02035	0	93.5754	0	2588.6	15.564	0	72.0612	12.7963	96.2743	50.7052	0
283	71.4485	0	0	0	0	0	0	0	0.408887	0	0	0	0	0	0	24.3464	0	0	0	0	0	0	0	0	0	0	0	0	11.1141	0	0	0	0	0	55.7749	0	1488.7	4.92122	0	18.8522	0	134.09	43.1499	6.79494	0	14.4561	10.3424	41.9406	0
284	71.7019	0	1.695	1.97232	0	0	0	0	0	0	0	0	0	0	0	1.92952	0	0	0	0	0	0	0	0	0	0	0	0	2.67631	0	0	0	1.42286	0	621.855	2.63112	7.90355	4.05821	0	38.1589	0	5.61692	15.0646	0	0	198.885	20.8434	5.6882	0
285	71.9553	0	0	0	0	0	0.0185662	0	0	0	0.846775	0	0	0	0	7.19561	0	0	0	0	0	0	0	0	0	0	0	0	0.258715	0	0	0	1.91611	0	285.772	0	1440.11	17.8321	0	265.987	0	15667.4	0.99592	0	0	23.1302	15.5173	1495.47	0
286	72.2086	0	0	1.36119	0	0	1.89837	6.41093	0	0	0.13916	0	0	0	0	82.2232	0	0	0	0	0	0	0	0	0	0	0	0	6.85573	0	0	0	4.23076	0	182.671	0	13.1201	0.747708	0	14.0327	0	4.21403	150.643	0	0	14.9963	9.59498	9.88822	0
287	72.462	0	0	0	0	0	0	4.47443	0.15121	0	0	0	0	0	0	22.9271	0	0	0	0	0	0	0	0	0	0	0	0.561438	0	0	0	0	1.61088	0	101.093	0	6.45715	5.01244	0	809.826	0	171.151	24.4943	0.102221	11.1465	11.3954	7.49312	19.4361	0
288	72.7154	0	0	0	0	0.132785	0	0	0.272229	0	0	0	0	0	0	19.3203	0	0	0	0	0	0	0	0	0	0	0	0	0	0	0	0	0	0	138.138	0	23.8982	0.1427	0	0	0	5.05648	39.5545	0	0	11.0442	23.5889	80.547	0
289	72.9687	0	2.41109	0.263037	0	0	0	0	0.504792	0	0	0	0	0	0	63.6132	0.885818	0	0	0	0	0	0	0	0	0	0	0	1.35923	0	0	0	3.11172	0	130.398	0	0.107896	1.90753	0	100.658	0	9.57838	15.3574	0	403.804	12.5974	0	118.996	0
290	73.2221	0	0	0	0	0	0	0	0	0	0	0	0	0	0	22.0098	0	0	0	0	0	9.57111	0	0	0	0	0	0.0402307	1.49157	0	0	0	0	0	281.535	0	266.295	33.8894	0	53.2987	0	6.237	6.22285	0	0	4.43348	15.3269	222.099	0
291	73.4755	0	0	0	0	0	0	0	0.598649	0	0.527065	0	0	0	0	5.37762	0	0	0	0	0	0.664997	0	0	0	0	0	0	81.0084	0	0	0	4.80857	0	58.1248	0	4.1145	0.0207291	0	1.89742	0	14.5107	0	0	0	1.04937	20.4145	0	0
292	73.7288	0	0	0	0	0	0	0	0	0	0.343727	0	0	0	0	41.0302	0	0	0	0	0	0	0	0	0	0	0	0.0648593	0	0	0	0	0	0	51.6492	0	0	0.0116394	0	2.56959	0	5.30443	0	0	0	3.1546	0	0.199484	0
293	73.9822	0	0	0	0	0	0	0	0	0	0	0	0	0	0	15.5692	0	0	0	0	0	0	0	0	0	0	0	0	0	0	0	0	0	0	56.2437	0	548.667	0	0	62.339	0	6.28699	38.7722	144.177	2.1203	0	19.1836	2.31875	0
294	74.2355	0	0	0	0	0	0	0	0	0	0	0.00289307	0	0	0	0	0	0	0	0	0	0	0	0	0	0	0	0	0	0	0	0	1.48391	0	40.9436	0	3.49472	0	0	0	0	1.73793	0	0	9.73824	0	20.0927	1.24991	0
295	74.4889	0	0	0	19.108	0	0	0	0	0	0	0	0	0	0	42.7291	0	0	0	0	0	0	0	0	0	0	0	0	0	0	0	0	0	0	10.5571	0	2.69056	0.00118802	0	244.069	0	0	0.264505	0.0212343	0	0.308126	0	0	0
296	74.7423	0	0	0	0	0	0	0	0	0	0	0	0	0	0	0	0	0	0	0	0	0	0	0	0	0	0	0	0	0	0	0	0	0	52.1484	0	1.01206	0	0	0	0	0	0	0	0	0.397835	0	3485.16	0
297	74.9956	0	204.752	54.7717	0	0	0	60.1973	496.822	0	24.4759	0	0	0	0	159.674	1.49396	0	0	41.178	0	0	0	0	0	0	0	2.77313	1434	0	14.168	22.8559	22.3662	0	2762.38	1.21525	11021.8	252.95	22.0892	2117.6	0	3334.79	212.948	1426.21	2386.67	453.717	71.8145	4488.2	0
298	75.249	0	0	0.711543	0	0	0	0	0	0	0	0.00288913	0	0	0	0.659151	0	0	0	0	0	0	0	0	0	0	0	0.528347	0	0	0	0	0	0	58.942	0	1.70423	0	0	2.64339	0	0	0	0	0	0	0	24.2617	0
299	75.5024	0	0	0	0	0	0	0	0	0	0	0	0	0	0	0	0	0	0	0	0	0	0	0	0	0	0	0	0	0	0	0	0.167416	0	13.4969	0	9.21507	0	0	0	0	0.23445	0	0	0	0	11.2423	0	0
300	75.7557	0	0	0	0	0	0	0	0	0	0	0	0	0	0	11.563	0	0	0	0	0	0	0	0	0	0	0	0	0	0	0	0	0	0	48.7559	0	368.897	3.19249	0	89.6965	0	1.69304	0.475072	0	0	0	27.1142	8.32015	0
301	76.0091	0	0	0	0	0	0	0	0	0	0	0	0	0	0	0.706356	0	0	0	0	0	0	0	0	0	0	0	0	0	0	0	0	1.18209	0	27.3186	0	0	0.485772	0	0	0	4.12287	0	0	0	5.38007	35.1683	0	0
302	76.2625	0	0	0	0	0	0	0	0	0	0	0.00288913	0	0	0	51.9595	0	0	0	0	0	0	0	0	0	0	0	2.74433	0	0	0	0	1.30455	0	46.9609	0	0.011671	0.764435	0	0	0	10.9255	11.0107	8.33623	0	6.58636	87.5505	5.18975	0
303	76.5158	0	0	1.34281	0	0	0	0	0	0	0.111192	0	0	0	0	13.1512	0	0	0	0	0	0	0	0	0	0	0	0	2.32574	0	0	0	0	0	87.4579	0	0	3.52406	0	0	0	9.32507	0	140.774	0	248.966	28.9109	16.3765	0
304	76.7692	0	0	0	0	0	0	0	0	0	0.0909996	0	0	0	0	26.2699	1.49088	0	0	0	0	0	0	0	0	0	0	0	0	0	0	0	4.64182	0	43.4565	0	21.3143	19.1945	0	79.6565	0	11.3982	53.3508	0	0	19.9781	7.12957	15.8923	0
305	77.0225	0	0	1.18498	0	0	0	0	0	0	0	0	0	0	0	0	0	0	0	0	0	0	0	0	0	0	0	0.299072	2.04793	0	0	0	2.98765	0	118.911	0	166.443	0.917034	0	12.6031	0	4.59357	1.00453	0.630982	8.78125	5.44899	0	14.0739	0
306	77.2759	0	0	0	0	0	0	0	1.5621	0	0.221812	0	0	0	0	38.8103	0	0	0	0	0	0	0	0	0	0	0	2.71462	0	0	0	0	1.31391	0	67.7278	0	84.6364	0.108879	0	54.75	0	9.16536	12.7427	16.9417	19.6945	16.9649	58.2749	0	0
307	77.5293	0	0	0.353539	0	0	0	0	0	0	0.272766	0	0	0	0	9.12426	0	0	0	0	0	0	0	0	0	0	0	0.00595981	0	0	0	0	2.09161	0	79.4158	0	18.7758	0.320421	0	6.40753	0	6.17373	0	158.329	0	33.1294	24.3269	130.677	0
308	77.7826	0	0	0.0147574	51.1724	0	0	2.90705	2.73379	0	0	0	0	0	0	7.127	0.0437948	0	0	0	0	0	0	0	0	0	0	0	19.7704	0	0	0	1.29912	0	58.3149	0	0	8.42574	0	60.1721	0	5.63208	0	158.891	125.014	9.90385	115.763	0	0
309	78.036	0	0	4.60026	0	0	0	0	0.590685	0	0	0	0	0	0	21.5094	0	0	0	0	0	0	0	0	0	0	0	8.07344	0	0	0	0	0	0	88.8128	0	0	0	0	0	0	105.341	2.6701	211.015	0	13.1905	0	0.81205	0
310	78.2894	0	0	0	0	0	0	0	0.222992	0	0	0	0	0	0	4.97933	0.122152	0	0	0	0	0	0	0	0	0	0	0	0	0	0	0	5.55359	0	52.8955	0	0.0130445	11.4158	0	0	0	8.03757	4.30305	138.783	0	24.7472	18.1765	35.1469	0
311	78.5427	0	0	0.241219	0	0	0.944938	0	0.553098	0	0.456869	0	0	0	0	8.39535	0.143876	0	0	0	0	0	0	0	0	0	0	0	0	0	0	0	4.00385	0	40.9427	0	0.00375745	0.179161	0	2.81436	0	2.57932	3.16727	139.645	0	5.79917	0	1.91389	0
312	78.7961	0	0	0	0	0	6.15215	0	2.82917	0	0	0	0	0	0	29.2729	0	0	0	0	0	0	0	0	0	0	0	0	0	0	0	0	0.672579	0	1750.9	0	13.2146	2.531	0	0	0	4.861	0	0	96.0622	0	22.4152	0.723261	0
313	79.0495	0	0	0	0	0	0	0	0	0	0.0765501	0	0	0	0	4.80353	0	0	0	0	0	0	0	0	0	0	0	2.64228	0	0	0	0	0	0	37.7851	0	0.0987119	0	0	0	0	2.41871	0	0	0.709814	33.6104	44.7112	1.35719	0
314	79.3028	0	0	0	0	0	0	0	0.0971489	0	0	0	0	0	0	0	0	0	0	0	0	0	0	0	0	0	0.087033	0	0	0	0	0	1.54562	0	7.10056	0	2.35277	0	0	0	0	0	0	0	0	17213.4	0	0	0
315	79.5562	0	0	0	0	0	0	0	0	0	0	0	0	0	0	0	0	0	0	0	0	0	0	0	0	0	0	0	0	0	0	0	0	0	25.9127	0	1.99443	0	0	0.353555	0	0	0	1.85837	0	0	0	288.452	0
316	79.8095	0	580.292	114.605	4.29886	3.97849	75.8238	88.638	413.493	0	104.533	0	4.85403	0	0	170.966	25.4399	0	376.265	0	0	44.4978	0	4.11618	0	0	48.9727	7.06578	5636.28	0.268803	21.0914	16.3142	40.5336	0	18553.3	1.91915	124251	363.003	0.517221	21316.5	0	5363.01	419.238	12303.5	27354.3	1728.16	595.678	56955.9	5.57931
317	80.0629	0	0	0	0	0	0	0	0	0	0	0	0	0	0	0	0	0	0	0	0	0	0	0	0	0	0	0	0	0	0	0	0	0	61.8354	0	3.539	0	0	14.2707	0	0	0	0	0	6.87201	5153.82	0	0
318	80.3163	0	0	0	0	0	0	0	24.1041	0	0	0	0	0	0	0	0	0	0	0	0	0	0	0	0	0	0	0	0	0	0	0	0	0	766.721	0	0	0	0	117.7	0	0	0.309314	0	14.0597	23.3034	0	0	0
319	80.5696	0	0	1.2434	0	0	0	0	0.188208	0	0	0	0	0	0	0.25049	0	0	0	0	0	0	0	0	0	0.00515465	0	2.61275	0	0	0	0	0	0	5.48711	0	278.105	0.207559	0	0	0.234746	0	5.59062	110.942	0	264.326	25.4345	0	0
320	80.823	0	0	0	0	0.143189	0	0	0	0	0	0	0	0	0	0	0	0	0	0	0	0	0	1.58485	0	0	0	0	0	0	0	0	1.6392	0	35.946	0	0.0732978	0	0	0	0	1.08827	0	0	0	0	20.1386	294.437	0
321	81.0764	0	0	0	0	0	4.99537	0	0.496113	0	0.0778565	0	0	0	0	0.713216	0	0	0	0	0	0	0	0	0	0	0	2.37605	0	0	0	0	2.24012	0	53.582	0	262.899	0	0	24.3826	0	5.06644	0.0779986	8.3955	0	0	16.2607	0	0
322	81.3297	0	0	0	0	0	0	0	0.0926218	0	0	0	0	0	0	0	0	0	0	0	0	0	0	0	0	0	0	0	235.526	0	0	0	1.8088	0	46.483	0	13.2071	0	0	0.156783	0	3.61057	1.5337	0	29.2628	88.1918	0	0	0
323	81.5831	0	0	0	0	0	0	0	0	0	0.242596	0	0	0	0	8.04429	0.0477653	0	0	0	0	0	0	0	0	0	0	0	0	0	0	0	2.10658	0	224.905	0	14.7853	2.2142	0	9.03542	0	13.1711	0	0	5.10883	0	9.12666	11.6656	0
324	81.8365	0	3.60807	0	0	0	0	0	0.447649	0	0	0	0	0	0	1.39903	0	0	0	0	0	0	0	0	0	0	0	0.0797352	0	0	0	0	1.45699	0	33.9844	0	21.9442	0	0	0	0	4.05051	5.59457	0	0	0	0	0	0
325	82.0898	0	0	0	0	0	0	0	0.109755	0	1.70799	0	0	0	0	8.51154	0	0	0	0	0	0	0	0	0	0	0	0	0	0	0	0.194385	1.66226	0	289.855	0	0	3.40408	0	2.13825	0	7.99106	9.71053	0	0	0	13.8342	1.33982	0
326	82.3432	0	0	0	0	0	0	0	0	0	0.179951	0	0	0	0	4.15053	0	0	0	0	0	0	0	3.3332	0	0	0	0	1.29247	1.11969	0	0	1.47735	0	54.2963	0	0.621072	8.40529	0	3.23757	0	4.94434	5.46978	0	0	0	0.0297635	47.6917	0
327	82.5965	0	0	0.259583	0	0	0	0	0.401755	0	0.0742845	0	0	0	0	5.83125	0	0	0	0	0	0	0	0	0	0	0	0	0	0	0	0	0.924304	0	114.938	0	68.1638	9.17136	0	8.07136	0	13.4976	5.46018	34.44	9.84392	2.59814	0	0.563175	0
328	82.8499	0	2.96871	0	0	0	0	5.566	0.324411	0	0	0	0	0	0	2.00794	0.374099	0	0	0	0	0	0	0	0	0	0	0	0	0	0	0	0	0	571.75	0	1.16958	1.52357	0	73.3015	0	3.27686	0	0	4.64226	0	22.44	935.451	0
329	83.1033	0	23.3732	0	0	0.119465	0	0	0.117562	0	0.258672	0	0	0	0	2.62388	0	0	0	0	0	0	0	0	0	0	0	0	0	0	0	0	0.508238	0	243.16	0	0	0.00625978	0	0	0	1.08407	13.975	0	0	0	22.424	1.58063	0
330	83.3566	0	0	0	0	0	0	0	0	0	0.292201	0	0	0	0	3.70458	0	0	0	0	0	0	0	0	0	0	0	0	0	0	0	0	11.9304	0	72.3152	0	0	9.53621	0	0	0	3.84267	4.15717	0	0.257381	0	0	7.59092	0
331	83.61	0	0	0	0	0	0	3.35112	2.03862	0	0	0	0	0	0	2.40159	0	0	0	0	0	0	0	0	0	0	0	2.42282	0	0	0	0	0	0	37.9691	0	6.63429	1.3914	0	1.55752	0	0	0	88.8255	0	0.0952702	0.690324	0	0
332	83.8634	0	0	0	0	0	0	0	0	0	0.0868909	0	0	0	0	5.19889	0	0	0	0	0	0	0	0	0	0	0	0	0	0	0	0	2.90612	0	21.4997	0	114.091	0	0	2.73263	0	0.760389	26.9487	0	0	0	0	0	0
333	84.1167	0	0	0	0	0	0	0	0	0	0	0	0	0	0	0	0	0	0	0	0	0	0	0	0	0	0	0	0	0	0	0	0	0	10.2016	0	3.05107	0	0	0	0	0	0	0	0	0	0	2.66008	0
334	84.3701	0	0	0	0	0	0	4.50819	0	0	0	0	0	0	0	0	0	0	0	0	0	0	0	0	0	0	0	0	0	0	0	0	0	0	9.06348	0	0	0	0	0	0	0	0	0	0	0	0.571372	0	0
335	84.6235	0	0	0	0	0	0	0	0	0	0	0	0	0	0	0	0	0	0	0	0	0	0	0	0	0	0	0	0	0	0	0	0	0	4.61955	0	0	0	0	10.3829	0	0	0	0	9.89329	0	0	0	0
336	84.8768	0	162.638	11.7213	0	1.26089	54.0777	21.9502	1.52778	0	5.0789	0	0	0	0	45.3077	29.6433	0	0	0	0	15.1369	0	72.6024	0	0	5.68468	9.24986	348.586	0	2.84075	0	1.61706	0	3036.6	1.71166	3310.03	191.719	22.0496	2582.06	0	2148.29	221.461	125.771	989.13	143.84	421.067	222.043	0
337	85.1302	0	0	0	0	0	0	0	0	0	9.68626	0	0	0	0	0	0	0	0	0	0	0	0	0	0	0	0	0	0	0	0	0	0	0	13.3754	0	0	0.225395	0	0	0	0	0	0	0	0	0	0	0
338	85.3835	0	0	0	0	0	0	0	0	0	0	0	0	0	0	0	0	0	0	0	0	0	0	0	0	0	0	0	0	0	0	0	0	0	13.4516	0	0	6.67246	0	2.73263	0	0	0	0	0	14.689	1.65092	0	0
339	85.6369	0	0	0	0	0	0	0	0.112944	0	0	0	0	0	0	0	0	0	0	0	0	0	0	0	0	0	0	0	0	0	0	0	0	0	2.2075	0	0	1.98174	0	0	0	0	0	0	0	0	0	0	0
340	85.8903	0	0	0.600789	0	0	0	0	0	0	0	0	0	0	0	14.4216	0	0	0	0	0	0	0	0	0	0	0	0	0	0	0	0	0	0	119.813	0	10.4254	0	0	0	0	3.88292	6.85982	0	0	1.0087	46.7762	0	0
341	86.1436	0	0	0	0	0	0	0	0.0671367	0	0	0	0	0	0	9.52841	0	0	0	0	0	0	0	0	0	0	0	0	0	0	0	0	1.92241	0	99.0164	0	95.9873	6.9679	0	0	0	0.66909	0	0	0	0	21.3876	7.95345	0
342	86.397	0	0	0.00288913	0	0	0	0	0.0767553	0	0	0	0	0	0	0.840172	0	0	0	0	0	0	0	0	0	0	0	0	0	0	0	0	0	0	124.433	0	3.87681	0	0	6.58007	0	1.57154	0	8.51462	8.07778	6.30747	9.94871	1.96758	0
343	86.6504	0	0	0.00289307	0	0	0	0	0.128179	0	0	0	0	0	0	1.94316	0	0	0	0	0	0	0	0.519037	0	0	0	0	0	0	0	0	0.520098	0	126.517	0	0.778588	0.556469	0	356.121	0	191.822	0	49.9944	0	1.97761	20.2469	0	0
344	86.9037	0	0	0	0	0	0	0.784777	0	0	0.335991	0	0	0	0	4.57645	0	0	0	0	0	0	0	0	0	0	0	0.762414	0	0	0	0	0	0	2722.84	0	1.50744	0.791329	0	1.18317	0	9.35952	0	0	0	4.83548	0	0	0
345	87.1571	0	0	0	0	0	0	0	0.0750344	0	0.303256	0	0	0	0	6.63858	0	0	0	0	0	0	0	2.23268	0	0	0	0	0.210804	0	0	0.323965	0	0	158.149	0	16.9928	53.5528	0	1384.63	0	10.2193	15.9824	0	0	5.91067	19.6729	1.0533	0
346	87.4105	0	4.58721	0	0	0	0.0248694	0	0	0	0.102513	0	0	0	0	0.788404	0	0	0	0	0	0	0	0	0	0	0	0	0	0	0	0	1.2745	0	97.108	0	2.26389	3.50394	0	9.49032	0	280.183	0.55862	76.8285	0	2.23317	0	0	0
347	87.6638	0	3.00994	0.266802	0	0	0	0	0.482528	0	0.600654	0	0	0	0	0	0	0	0	0	0	0	0	0	0	0	0	0	0	0	0	0	4.8098	0	1315.84	0	15.0885	0	0.818148	28.7989	0	12.5737	10.2164	0	0	4.56942	41.6716	3.63189	0
348	87.9172	0	4.25583	0.601767	0	0	0	0	0	0	0	0	0	0	0	0	0	0	0	0	0	0	0	0	0	0	0	0	19.0643	0	0	0	0.606962	0	202.381	0	4.87557	0	0	32.5579	0	0.5958	0	0	0	56.0467	0	0	0
349	88.1705	0	0	3.67053	0	0	0	0	0.0827664	0	0	0	0	0	0	11.0093	0	0	0	0	0	0	0	0	0	0	0	2.4229	0	0	0	0	0	0	223.464	1.28863	0	45.6117	0.206731	53.6463	0	366.988	6.58994	0	2.37013	226.133	7.37246	0	0
350	88.4239	0	5.29514	0	0	0	0	2.0501	0	0	0	0	0	0	0	18.3461	0	0	0	0	0	1.54866	0	18.8459	0	0	0	0	0	0	0	0	0	0	117.873	0	50.4197	0	0	41.5724	0	0	0	0	0	3.00337	0	0.973849	0
351	88.6773	0	0	0.701139	0	0	0	0	0	0	0.239186	0	0	0	0	16.5159	0	0	0	0	0	0	0	17.2001	0	0	0	0	2.45146	0	0	0	0	0	176.616	0	27.7866	12.3016	0	44.8375	0	668.767	17.0388	13.0994	12.6005	2.87732	2.96659	3.06161	0
352	88.9306	0	1.96677	0	0	0	0	0	0	0	0	0	0	0	0	0	0	0	0	0	0	0	0	0	0	0	0	0	0.412052	0	0	0	1.45294	0	607.335	0	9.63435	1.18165	0	67.4459	0	2.37395	36.5403	0	60.6661	3.53136	8.40659	3.09813	0
353	89.184	0	0	0	0	0	0	0	0	0	0.25506	0	0	0	0	29.6985	0	0	0	0	0	0	0	0	0	0	0	63.6014	0.560072	0	0	0	1.61675	0	596.465	1.10193	9.38375	2.88923	0	117.975	0	2.61959	20.8713	0	101.407	71.2953	0	0	0
354	89.4374	0	0	0	0	0	0	0	0	0	0.074328	0	0	0	0	0	0	0	0	0	0	0	0	0.83394	0	0	0	0	19.3223	0	0	0	4.47443	0	110.883	0	6.11451	0	0	41.2772	0	0	0	0	13.0843	82.1134	20.3798	12.3725	0
355	89.6907	0	0	0	0	0	0	0	0	0	0	0	0	0	0	0	9.65281	0	0	0	0	0	0	0	0	0	0	0	104.435	0	0	0	0.731652	0	306.567	0	0.0275375	22.7048	0	48.8082	0	22.1914	21.3937	124.504	62.9421	46.9454	0	69.2125	0
356	89.9441	0	0	0	0	0	0	1.6478	0.495564	0	0	0	0	0	0	0	0	0	0	0	0	0	0	0	0	0	0	0	0	0.845642	0	0	0	0	83.4048	0	127.222	6.41457	0	58.2538	0	0.944216	2.45024	0	0	2.96229	19.0191	0.572533	0
357	90.1975	0	3.67817	0	0	0	0	1.69867	0	0	0	0	0	0	0	1.55836	0	0	0	0	0	0	0	0	0	0	0	0	0.125278	0	0	0	0	0	290.095	0	126.097	34.9739	0	102.343	0	12.8098	0	7.67251	277.3	0	13.6722	31.9522	0
358	90.4508	0	0	0	0	0	0	1.92692	0.100425	0	0	0	0	0	0	7.06169	0	0	0	0	0	0	0	0.780053	0	0	11.6653	0	0.714913	0.743674	0	0	0	0	118.065	0	25.3841	0	0	23.8251	0	2.6184	0	0	84.6813	0.0996947	10.6359	0	0
359	90.7042	0	0	0	0	0	0	1.06138	0.968935	0	0	0	0	0	0	19.8299	0	0	0	0	0	0	0	13.1441	0	0	0	0	0.140948	0	0	0	0.920065	0	52.6395	0	7.43175	2.51765	0	11.9917	0	3.26555	0	0	96.2057	0	11.1792	0.653184	0
360	90.9575	0	0	0	0	0	0	7.48306	0	0	0.57391	0	0	0	0	21.9199	0	0	0	0	0	0	0	0	0	0	14.1451	0	122.536	0	2.70979	0	0	0	295.609	0	0	1.58175	0	23.7477	0	15.1683	0	0	144.781	2.96215	23.0608	0	0
361	91.2109	0	2.3549	0	0	0	0	0	0	0	0	0	0	0	0	0.60914	0	0	0	0	0	0	0	0	0	0	0	39.0627	0.901739	0	0	0	0	0	113.382	0	0.353547	0.0134076	0	27.6675	0	2.13856	0	0	82.4322	0.822983	7.73785	0	0
362	91.4643	0	0	0	0	0	0	0	6.11979	0	0	0	0	0	0	6.69953	0.187904	0	0	0	0	0	0	0	0	0	5.35661	0	12.9867	0	0	0	1.33507	0	397.855	0	8.97275	3.35605	0	22.9918	0	17.4121	0	6.36937	175.17	0.473099	9.22175	0	0
363	91.7176	0	3.68221	0	0	0	0	1.59552	0	0	0	0	0	0	0	0.838427	0	0	0	0	0	0	0	9.52353	0	0	4.07568	0	2.11088	0	0	0	0	0	83.6463	0	1.44145	28.0349	0	38.528	0	63.6781	0	0	9.58903	2.4781	7.3483	2.25754	0
364	91.971	0	3.08332	0	0	0	0	0	0	0	0	0	0	0	0	2.7771	0	0	0	0	0	0	0	1.37815	0	0	0	0	0	0	0	0.331831	0.462055	0	1958.81	0	65.0486	4.78487	0	16.2378	0	355.081	0	0	183.356	3.13486	0.017686	7.74705	0
365	92.2244	0	0	0	0	0	0	0	0	0	0	0	0	0	0	84.8401	0	0	0	0	0	0	0	0	0	0	0	0	0	0	0	0	0	0	694.17	0	0.715714	0.777783	0	144.028	0	0.882119	0	0	0.308924	0	13.1849	0	0
366	92.4777	0	0	0	0	0	0	0	0	0	0	0	0	0	0	15.1956	0	0	0	0	0	0	0	0.10097	0	0	0	0	12.845	0	0	0	2.87658	0	120.941	0	7.94271	21.8208	0	50.1519	0	3.26792	0	0	56.7521	5.40381	7.71544	7.80374	0
367	92.7311	0	0	0	0	0	0	0	0	0	0.0776512	0	0	0	0	11.1375	0	0	0	0	0	0	0	0	0	0	0	0	0	0	2.07215	0	0	0	120.816	0	0	1.66547	0	21.1402	0	0	0	0	8.80861	0.305742	6.76123	0	0
368	92.9845	0	2.51405	0	0	0	0	0	0	0	1.23568	0	0	0	0	12.6991	0	0	0	0	0	0	0	0	0	0	2.00755	1.61782	2.28534	0	2.57818	0	1.78217	0	188.467	0	0.554977	8.88353	1.30841	23.4188	0	731.382	0	0	0	0	4.57519	0.185105	0
369	93.2378	0	0	0.910344	0	0	0	0	0	0	0	0.00288913	0	0	0	0	0	0	0	0	0	0	0	0	0	0	0	0	6.84366	0	0	0	0	0	74.3081	0	36.6492	1.3228	0	35.9469	0	0.310925	9.90505	0	19.1343	0.336303	0	0	0
370	93.4912	0	3.82153	0	0	0	0	3.6354	0	0	0	0	0	0	0	7.27663	0	0	0	0	0	0	0	1.35974	0	0	0	0	0	0	0	0	0	0	1259.86	0	8.10885	1.22695	0	62.3005	0	12.9349	0	110.343	24.492	10.4557	10.3491	6.60821	0
371	93.7445	0	0	0	20.0742	0	0	0	0	0	0	0	0	0	0	0	0	0	0	0	0	0	0	0	0	0	4.33796	0	0	0	0	0	1.60663	0	847.001	0	14.7479	0.406783	0	7.07046	0	32.9451	0	5.9439	0	0	0	0	0
372	93.9979	0	1.08335	0	0	0	0	0	0.107324	0	0	0	0	0	0	16.9284	0	0	0	0	0	0	0	0.127327	0	0	0	0	0.169685	0	0	0	0.168315	0	174.461	0	11.1299	2.94176	0	110.366	0	8.34028	0	66.5989	14.6185	0.67308	0	0	0
373	94.2513	0	0	0	0	0	0	0.457587	0.17195	0	0	0	0	0	0	0.917125	0	0	0	0	0	0	0	0	0	0	0	0	7.08452	0	0	0	1.84443	0	414.823	0	17.8625	2.81661	0	65.811	0	1.14616	0	0	71.4751	1.16451	0	11.4515	0
374	94.5046	0	1.12783	0	0	0	0	15.8021	0	0	0	0	0	0	0	6.85926	0	0	0	0	0	0	0	0	0	0.120708	2.45087	0.248726	0.323271	0	0	0	0	0	161.16	0	17.4412	0.275553	0	25.2829	0	0.441563	0	0	4.33958	1.94277	0	0.780542	0
375	94.758	0	10.2272	0	0	0	0	0	13.761	0	0.132868	0	0	0	0	0.455997	0	0	0	0	0	0	0	0	0	0	0	0	5.21288	0	0	0	0	0	111.69	0	37.9987	31.5725	0	27.0814	0	72.5029	0	0	0	0	0	3.61599	0
376	95.0114	0	6.89897	0	0	0	0	1.20772	0.129079	0	0	0	0	0	0	13.8165	0	0	0	0	0	0	0	1.74938	0	0	0	0	36.2064	0	0	0	0	0	1698.05	0	759.746	2.65913	0	38.4049	0	194.521	0	15.5717	0.319525	0	0	4.53677	0
377	95.2647	0	0	0	23.3556	0	0	0	0	0	0.297821	0	0	0	0	0	0	0	0	0	0	0	0	0	0	0	0	0	3.79579	0	0	0	0.0930599	0	491.855	3.38439	8.34673	0.574873	0	30.0891	0	15.8577	0	8.47352	0	1.24031	20.3393	595.378	0
378	95.5181	0	0	0	0	0	0	1.66965	0	0	0	0	0	0	0	19.335	0	0	0	0	0	0	0	0	0	0	0	0	0	0.530183	0	0	0	0	73.2363	0	2.03317	0.498406	0	23.252	0	2.78416	0	0	0	25.6438	8.60678	2.32413	0
379	95.7715	0	1.42061	0	0	0	13.3418	2.45606	0	0	0	0	0	0	0	0	0	0	0	0	0	0	0	26.2141	0	0	1.42035	4.74136	2.94036	0	2.41179	0	62.1166	0	113.048	0	55.3671	10.7288	0	76.5368	0	492.955	0	0	26.2808	3.27726	41.0016	40.7879	0
380	96.0248	0	0	0	11.4411	0	11.6717	0	0	0	0	0	0	0	0	0	0	0	0	0	0	0	0	0	0	0	0	0	0.500605	0	0	0	0.0728558	0	66.9932	0	8.05537	2.02411	0	46.8087	0	0.982817	0	21.8299	0	9.15985	8.97777	0	0
381	96.2782	0	0	0	0	0	0	1.56757	6.38119	0	0.000959096	0	0	0	0	13.8934	0	0	0	0	0	0	0	0	0	0	2.10411	0	3.14437	0	0	0	0	0	78.1793	0	23.4888	4.09515	0	61.2522	0	0.145352	0	0	25.2264	0	16.019	3.73384	0
382	96.5315	0	13.8619	2.51885	0	0	16.6437	0	0.579456	0	0	0	0	0	0	29.6633	0	0	0	0	0	0	0	0	0	0	0	0	2.17151	0	0	0	0.0994697	0	100.081	0	49.0765	0.00273915	0	262.786	0	0	0.280127	48.1372	0	0	19.2907	9.65255	0
383	96.7849	0	0	0	12.8903	0	0	1.31453	0	0	0	0	0	0	0	61.2992	0	0	0	0	0	0	0	0	0	0	6.98785	0	0	0	3.88212	0	0.592508	0	94.6125	0	3.54843	8.35861	14.9801	136.948	0	0	0	0	0	3.41114	10.7536	0	0
384	97.0383	0	0	0	14.525	0	0	2.18254	0	0	0	0	0	0	0	0	0	0	0	0	0	0	0	0.00867133	0	0	0	4.03091	5.15487	0	0	0	1.37845	0	58.8406	0	0.0144851	12.9324	59.4834	19.5772	0	6.58747	0	18.1141	0.197211	21.2539	0	813.769	0
385	97.2916	0	1.46242	0	0	0	0	0	0.495288	0	0	0	0	0	0	0.369974	0	0	0	0	0	0	0	0	0	0	0	4.57474	0	0	0	0	1.05561	0	88.3119	0	26.584	19.4519	0	20.3161	0	286.225	0	111.181	0	0	77.071	0	0
386	97.545	0	0	0	0	0	0	0	0	0	0	0	0	0	0	0	0	0	0	0	0	0	0	0	0	0	0	0	0	0	2.14215	0	0	0	3111.05	0	1.82832	0	0	99.9427	0	3.20515	0	0	0	0	81.6813	0	0
387	97.7984	0	0	0	0	0	0	0.678156	0	0	0	0	0	0	0	15.4862	0	0	0	0	0	0.0254298	0	0	0	0	0	8.87771	0.507661	0	0	1.37505	0	0	64.3536	0	0.903591	6.95954	0	128.078	0	0.969587	0	5.16731	14.4489	0	0	15.6107	0
388	98.0517	0	0	0.845192	0	0	0	1.97036	0	0	0.0423821	0	0	0	0	0.823153	0	0	0	0	0	0.0178597	0	0	0	0	0	0	1.34329	0	0	1.37974	0.0934428	0	34.1326	0	58.1297	12.4813	17.5701	119.97	14.9005	87.8718	0	66.0397	0	0.0823046	0	13.9827	0
389	98.3051	0	0	0	0	0	0	0	1.81478	0	0	0	0	0	0	34.9572	0	0	0	0	0	0	0	0	0	0	0	0	1.72616	0	0	1.15688	0.0741938	0	345.804	0	91.1321	18.7228	0	4.74539	0	0.147306	15.1716	0	0	0	0	7.78917	4.91348
390	98.5585	0	0	5.50747	0	0	0	1.39964	0	0	0.715572	0	0	0	0	0	0	0	0	0	0	0	0	0	0	0	0	0	0	0	0	0	6.76186	0	117.434	0	0.676735	0.899809	0	67.1357	0	3.22409	0	0	13.9351	0	0	0	0
391	98.8118	0	13.6391	0	15.3176	0	0	0	0	0	0	0	0	0	0	2.36476	0	0	0	0	0	0	0	0	0	0	0	0	0	0	0	0	0.0946781	0	26.1599	0	4.69574	4.55624	0	129.764	0	0.148861	0	15.575	0	0	0	3.4642	0
392	99.0652	0	0	0	0	0	0	0	0.0796365	0	0	0	0	0	0	11.12	3.5214	0	0	0	0	0	0	0.0165375	0	0	0	0	2.38512	0	0	0	0	0	25.0369	0	5.32839	9.08151	0	42.1622	0	938.621	0	9.07406	9.30254	2.75948	7.12843	0	0
393	99.3185	0	25.0416	0	0	0	0	1.76734	0.200187	0	0	0	0	0	0	0.129873	0	0	0	0	0	20.5693	0	0	0	0	0	0	4.63803	0	0	0	0.0948163	0	92.949	0	27.8714	4.9752	18.9656	36.0466	0	624.679	0	5.22114	0	0	0	37.6135	0
394	99.5719	0	0	0	0	0	0	1.6801	0.12053	0	0	0	0	0	0	0	0	0	0	0	0	0	0	0	0	0	0	0	5.41146	0	1.78642	0	2.18663	0	115.279	0	1271.98	7.12034	0	27.0855	0	5.46797	0	123.782	0	2.13742	0	0	0
395	99.8253	0	1.1023	0	0	0	15.6408	0	0	0	0	0	0	0	0	0	0	0	0	0	0	0	0	0	0	0	1.47182	0	0	0	0	0	0	0	52.999	0	0	0.557053	0	2.74986	0	4.66469	0	0	0	2.69399	10.4059	194.039	0
396	100.079	0	0	0	0	0	7.86276	1.45029	0	0	0	0	0	0	0	0.417234	0	0	0	0	0	0	0	0	0	0	0	0	1.11833	0	0	0	0.104226	0	175.478	0	0.0306358	12.4365	0	66.382	0	0	0	0	0	3.0704	0	0	0
397	100.332	0	0	0	0	0	0	0	0	0	0	0	0	0	0	0	0	0	0	0	0	0	0	0	0	0	0	0	0	0	0	0	0	0	102.354	0	0	1.64085	0	24.6629	0	0	0	0	0	0.131878	0	17.552	0
398	100.585	0	0	0	0	0.171552	0	2.90271	0	0	0	0	0	0	0	0.488132	0	0	0	0	0	15.0112	0	0	0	0	0	0	188.239	0	0	0	1.30313	0	120.295	0	15.9204	27.3352	0	39.5138	0	3.74365	0	0	9.05078	0	0.97589	0	0
399	100.839	0	0	0	0	0	0	8.25628	0	0	0	0	0	0	0	14.8722	0	0	0	0	0	0	0	0	0	0	0	0	0.396596	0	0	0	0	0	4.0475	0	7.59669	15.8856	0	26.5418	0	0.140608	0	0	62.1799	5.24444	10.5817	0	0
400	101.092	0	11.2708	0	0	1.83533	21.4282	2.57225	0.761344	0	0.60144	0	0	0	0	3.49084	0	0	0	0	0	0	0	0.00303122	0	0	0	0	4.3091	0	0	0	0	0	36.1394	0	3.33812	108.071	16.4548	70.0099	0	6.58557	2.20501	0	0	6.32094	89.4168	0	0
401	101.345	0	1.15719	0	0	0	20.1183	0	0	0	0	0	0	0	0	20.2172	0	0	0	0	0	0	0	0	0	0	0	4.26231	2.17361	0	0	0	0	0	16.8412	0	46.1566	7.33897	0	15.6996	0	68.4454	2.69886	2.51752	0	0.869663	0	15.2843	0
402	101.599	0	0	0.847032	0	0	0	3.77367	15.5987	0	0	0	0	0	0	0.238227	0	0	0	0	0	0	0	0	0	0	0	0	0	0	2.7152	0	43.9022	0	27.6049	0	218.253	17.9947	0	44.3864	0	11.5611	0	6.97149	0	0.116627	0	0	0
403	101.852	0	12.0532	0	0	0	0	2.65368	17.3717	0	0.0989921	0	0	0	0	0.578911	0	0	0	0	0	0	0	0	0	0	0	0	1.00533	0	0	0	3.47852	0	189.587	0	6.56312	11.643	0	31.6674	0	1.05233	14.2685	0	7.76947	3.77482	0	16.9369	0
404	102.106	0	0	0	0	0	0	1.59326	0.665222	0	1.97345e-05	0	0	0	0	0	0	0	0	0	0	0	0	0	0	0	0	0	0	0	1.64171	0	0	0	37.4362	0	0	0	0	274.184	0	0	0	0.225324	0	0	0	0	0
405	102.359	0	0	0	0	0	0	3.61197	0	0	1.00233	0	0	0	0	0	0	0	0	0	0	0	0	0	0	0	0	0	2.28581	0	0	0	0	0	57.5481	0	1.5258	15.0841	12.3574	7.15459	0	60.177	0	17.8618	7.64712	6.28252	0	1.81112	0
406	102.612	0	0	0	0	0	0	1.90128	0	0	0	0	0	0	0	0.567039	0	0	0	0	0	0	0	0	0	0	0	0	1.03364	0	0	0	0	0	2113.61	0	27.5565	2.445	0	14.3383	0	0.107565	0	4.87734	417.788	0	0	10.4827	0
407	102.866	0	5.56069	0	0	0	25.2545	0	0	0	0.0691338	0	0	0	0	0	0	0	0	0	0	0	0	0	0	0	0	0.0778367	2.11792	0	5.08969	0	0.555695	0	580.691	0	94.4792	0	0	11.819	0	2.21338	0	0	0	7.13265	352.824	10.0556	0
408	103.119	0	0	0	0	1.92579	0	0	0	0	0	0	0	0	0	0	0	0	0	0	0	0	0	0.23128	0	0	0	0	0	0	1.71274	0	0	0	376.123	0	0	0	0	121.744	0	0.238428	15.29	0	0	0	0	0	0
409	103.372	0	0	0	0	0	0	2.88741	0	0	0	0	0	0	0	0.302447	0	0	0	0	0	0	0	0	0	0	0	0	0.32942	0	3.28168	0	0	0	8.80372	0	9.24376	1.91342	0	19.7267	0	2.86557	0	1.87598	0	0	30.0534	4.57678	0
410	103.626	0	10.8217	0	1.80919	0	0	4.0238	0	0	0	0	0	0	0	3.53207	0	0	0	0	0	0	0	0	0	0	0	0	1.69805	0	0	0	0	0	23.5327	0	2.86427	21.3336	0	9.72454	0	0	0	0	0	0	273.929	2792.81	0
411	103.879	0	1.51604	6.23561	0	0	0	0	0	0	0	0	0	0	0	9.2855	0	0	0	0	0	0	0	0	0	0	0	0	0	0	4.50101	0	0	0	13.6488	0	9.03375	115.841	0	4.88553	0	0	0	0	12.1375	0	0	3.00739	0
412	104.132	0	0	0	0	0	0	0	0	0	0	0	0	0	0	0	0	0	0	0	0	0	0	0	0	0	0	0	4.07736	0	0	0	0	0	78.6662	0	259.436	8.17108	0	2.96887	0	0.527274	0	0	0	0	0	12.4506	0
413	104.386	0	0	0	3.11153	0	17.8487	0.97126	0.14346	0	0	0	0	0	0	0	0	0	0	0	0	0	0	0	0	0	0	0	18.0385	0	0	0	0	0	100.135	0	21.8149	1.53023	0	50.9802	0	5.18	0	0	0	0	1.51051	262.602	0
414	104.639	0	0	0	2.30473	0	0.691113	0.890814	0	0	0	0	0	0	0	0.343882	0	0	0	0	0	0	0	0	0	0	0	0	0.352237	0	0	0	0	0	10.5536	0	0.345393	0.913778	0	26.5165	0	761.414	0	0	0	0	0	0	0
415	104.893	0	36.5332	0	0	0	0	0	0	0	0.00127879	0	0	0	0	10.0602	0	0	0	0	0	0	0	0	0	0	0	0	3.00845	0	0	0	0	0	19.3893	0	22.4206	2.9388	7.53311	74.2067	0	1.04594	0	0	0	0	0.385876	0	0
416	105.146	0	0	2.84568	2.25924	0	1.07132	0.637072	0	0	0	0	0	0	0	0	0	0	0	0	0	0	0	0	0	0	1.12667	0	0	0	0	0	0	0	28.2019	0	37.333	0	0	29.5521	0	0	16.1817	0	0	0	9.92319	10.8622	0
417	105.399	0	0	0	5.48632	0	10.4521	2.07543	0	0	0.0609519	0.104234	0	0	0	0	0	0	0	0	0	0	0	0	0	0	0	11.6119	2.38277	0	0	0	0	0	2297.57	0	245.138	10.1976	0	359.845	0	6.44695	0	12.0823	0.954845	0	0	390.412	0
418	105.653	0	0	0	5.40248	0	53.0546	0	0	0	0.772348	0	0	0	0	0	0	0	0	0	0	0	0	0	0	0	1.98212	18.7812	0.312927	0	0	0	0	0	215.663	0	258.106	1.22107	0	45.2775	14.893	4.8468	0	0	0	2.85231	67.1729	4.57927	0
419	105.906	0	21.8861	0	1.59263	0	0	0	0	0	0	0	0	0	0	0	0	0	0	0	0	0	0	0	0	0	0	0	0.799795	0	0	0	0	0	11.9368	0	0	1.10695	4.74423	3.2263	0	3.09188	0	0	5.79422	0	0	3.27699	0
420	106.159	0	172.688	0	0	0	0	3.60869	0.742865	0	0.993181	0	6.77901	0	0	0.231837	0	0	0	0	0	0	0	0	0	0	0	0	0.573512	0	0	0	0	0	12.7512	0	0	1.64844	0	22.2806	0	0.0339354	23.0737	0	0	0	0	3.67582	0
421	106.413	0	8.61558	7.77954	0	0	0	0	0	0	0	0	0	0	0	0	0	0	0	0	0	0	0	0	0	0	0	0	11.8048	0	0	0	0	0	12.5617	0	86.1055	0.329459	0	23.59	0	0.338217	0	0	0	0	0	280.292	0
422	106.666	0	0	0	0	0	1.135	0	0	0	0	0	0	0	0	0.978294	0	0	0	0	0	0	0	0.0372271	0	0	0	0	4.15666	0	0	0	0	0	345.538	0	356.791	69.8047	0	16.3381	0	575.967	0	0	0	0	0	0	0
423	106.919	0	0	0	0	0	0	0	0.0862397	0	0	0.00288913	0	0	0	0	0	0	0	0	0	0	0	0	0	0	1.82424	0	17.1364	0	19.5446	0	0	0	185.932	0	15.5735	2.35934	0	24.4415	0	0	15.8128	0	0	0	0	0	0
424	107.173	0	0	0	0	0	0	0	0	0	0	0	0	0	0	0.724465	0	0	0	0	0	0	0	0.572758	0	0	0	0	3.63935	0	0	0	14.1214	0	24.0495	0	31.1698	25.4694	0	86.3892	0	0	0	0	0	0	0	56.8244	0
425	107.426	0	0	0	0	0	0.0721453	0	0	0	0	0	0	0	0	0.904029	0	0	0	0	0	0	0	0	0	0	0	13.0949	0	0	1.41979	0	0	0	61.1946	0	41.5764	8.88558	0	0	0	0.0605612	11.3265	0	0.0709218	0	0	0	0
426	107.68	0	131.933	0.891639	0	0	0	0	0	0	0	0	0	0	0	1.67787	0	0	0	0	0	0	0	0	0	0	0	0	0	0	0	0	0	0	93.2418	0	16.8058	0.326258	0	38.3067	0	2.24927	9.76826	0	0	1.50822	16.6859	43.4069	0
427	107.933	0	53.1789	0	0	0	0	2.72984	0	0	0	0	0	0	0	0	0	0	0	0	0	0	0	0	0	0	0	0	13.4491	0	0	0	0	0	131.872	0	0	0	0	0	0	0	26.0734	0	0.105927	1.95397	0.284267	0	9.43695
428	108.186	0	41.7903	0	1.26961	0	9.99871	0	0	0	0	0	0	0	0	0	0	0	0	0	0	0	0	0	0	0	0	0	0	0	0	0	0.0796799	0	113.777	0	396.397	13.3767	0	29.0686	0	7.29335	0	0	3.41178	0.56885	56.9798	6.32499	0
429	108.44	0	0	0	0	0.238148	0	4.11588	0	0	0	0	0	0	0	0	0	0	0	0	0	0	0	0	0	0	0	0	7.19846	0	0	0	0.870796	0	12.1607	0	34.657	6.549	0	6.21417	0	2.91807	0	0	0	0	275.031	12.383	0
430	108.693	0	0	0	0	0	0	0	0	0	0	0	0	0	0	0	0	0	0	0	0	0	0	0	0	0	0	0	8.49246	0	0	0.68153	0	0	25.6009	0	137.009	0	0	6.89406	0	0	2.43685	0	0	0.118987	0.60665	0	0
431	108.946	0	0	0	1.21088	0	0	0	0	0	0.789486	0	0	0	0	1.2636	0	0	0	0	0	0	0	0	0	0	0	0	0	0	0	0	0	0	30.2038	0	12.5829	0	0	99.8315	0	0	0	0	245.284	9.04805	0	8.07171	0
432	109.2	0	0	0	0	0	0	0	0	0	0	0	14.1781	0	0	1.96314	0	0	0	0	0	0	0	0.0342709	0	0	0	1.41508	9.09381	0	0	0	0	0	69.3189	0	10.4677	43.9348	0	28.3562	0	2.36493	0	0	0	0	8.13382	218.042	0
433	109.453	0	0	0	0	0	0	3.14866	0	0	1.01453	0	11.1236	0	0	0	0	0	0	32.393	0	0	0	0	0	0	0	0	0	0	0	0	0	0	112.423	0	17.1142	0.0485547	0	0	0	57.3335	0	0	0	7.82442	1.07647	8.27735	0
434	109.706	0	36.0269	0	0	0	36.5991	0	0	0	0.623602	0	0	0	0	17.4728	0	0	0	0	0	0	0	0.0621715	0	0	0	0	0	0	0	0	0	0	386.221	0	23.4257	1.36472	0	2.11284	0	0	2.07529	0	0	0	56.885	0	0
435	109.96	0	43.5052	0	0	0	0	0	0	0	0	0	0	0	0	0	0	0	0	0	0	0	0	0	0	0	0	0	8.33433	0.997779	0	0	0.233171	0	33.9369	0	0.12915	6.21145	0	4.67289	0	2.92405	0	0	0	0	71.1167	0	0
436	110.213	0	0	0	0	0	0	0	0	0	0	0	0	0	0	0.422022	0	0	0	0	0	0	0	0	0	0	0	0	0	0	0	0	0	0	11.5024	0	0.575615	2.99322	0	3.32276	0	0.0157481	0	13.8812	0	0	0	3.45387	0
437	110.467	0	208.224	0	0	0	0	2.39004	0	0	0.772123	0	0	0	0	0	0	0	0	0	0.970842	0	0	0	0	0	0	0	0	0	0	0	0	0	42.1011	0	0	4.71936	0	0.18018	7.55295	0	0	0	0	0.11903	0	0	0
438	110.72	0	7.72516	0	0	0	0	0	0	0	0	0	0	0	0	0	0	0	0	0	0	0	0	0	0	0	0	0.00288913	4.5689	0	0	0	0	0	129.958	0	5.27501	5.73082	0	62.8044	0	57.5432	0	6.08196	0	0	0	2.33642	0
439	110.973	0	0	0	0	0	0	0	0	0	0.0861055	0	5.56642	0	0	11.316	0	0	0	0	0	0	0	0.841624	0	0	0	0	0	0	0	0	0	0	221.924	0	12.1779	14.109	0	5.32327	0	0.324257	0	0	0	0	0	0	0
440	111.227	0	0	0	0	0	0	5.60593	0	0	0	0	0	0	0	0	0	0	0	0	0	0	0	0	0	0	0	0	9.12268	1.05604	0	0	0	0	26.1372	0	2.59065	0	0	1.96356	0	0	0	0	3.18724	0	0.18683	3.59338	11.287
441	111.48	0	0.82633	0	0	0	0	0	0	0	0	0	0	0	0	0	0	0	0	0	0	0	0	0	0	0	0	0.0697772	9.67359	0	0	0	0	0	54.9931	0	396.515	59.3155	0	2.54513	0	0	25.6691	0	0	0	0	4.70232	0
442	111.733	0	0.743868	0	0	0	0	0	16.5454	0	0	0	0	0	0	0	0	0	0	0	0	0	0	0	0	0	0	0	4.02973	0	0	0	3.99157	0	90.029	0	0	0	0	18.6597	0	10.3561	0	0	0	0	0.523801	0	10.0606
443	111.987	0	0	0	0	0	0	0	0	0	0.641753	0	5.69696	0	0	0	0	0	106.603	0	0	0	0	0.0456853	0	0	0	0	4.457	0	0	0	0.0926258	0	154.945	0	3.69398	0.403266	0	24.1322	0	0	2.73023	0	0	0	0	2.96338	0
444	112.24	0	0	0	0	0	0	0	0.0939361	0	0	0	0	0	0	0	0	0	0	0	0	0	0	0	0	0	0	0	18.1481	1.12328	0	0	0	0	22.9176	0	0	0	0	17.7804	0	0	0	0	0	0	0	166.751	0
445	112.493	0	139.717	0	0	0	0	0	0	0	0	0	0	0	0	3.56078	0	0	0	0	0	0	0	0	0	0	0	0	3.43164	0	0	0	0	0	21.5336	0	26.4002	0.852569	0	28.2359	0	9.16121	0	0.0075662	0.0265547	0	1.27329	139.331	0
446	112.747	0	145.853	0	0	0	0	0	0	0	0	0	0	0	0	3.5791	0	0	0	0	0	0	0	0.715501	3.04966	0	0	0	4.37294	0	0	0	0	0	707.231	0	0	3.00491	0	3.20382	0	24.2509	0	0	0	0	0	5.28358	0
447	113	0	8.00611	0	0	0	0	0	0	0	0	0	6.78326	0	0	0	0	0	0	0	0	0	0	0	0	0	0	0	9.45894	0	0	0	0	0	3.12518	0	0	0	0	1.78993	0	0	3.07872	0	0	0	8.30745	0	0
448	113.254	0	0	0	0	0	0	0.264039	0	0	0	0	13.9211	0	0	0	0	0	0	0	0	0	0	0	2.81368	0	0	0	13.9986	0	0	0	0.927327	0	25.8641	0	99.9716	0.105872	0	92.5256	0	1.51265	0	0	0	1.02006	12.8734	4.58999	0
449	113.507	0	0	0	0	0	5.42209	0	0	0	0.656511	0	0	0	0	0	0	0	0	0	0	0	0	0	0	0	0	0	4.63774	0	0	0	0	0	32.4172	0	122.794	0	0	2.5782	0	0	0	0	0	5.95256	0	10.513	0
450	113.76	0	0	0	1.15825	0	0	0.641367	0	0	0	0	0	0	0	1.34391	0	0	0	0	0	0	0	0	0	0	0	0	1.67163	0	0	0	0	0	27.5315	0	0.232606	0	0	0	0	0.746729	0	0	0	5.02987	78.4736	0	0
451	114.014	0	0	0	0	0	0	0	0	0	0	0	0	0	0	0	0	0	0	0	0	0	0	0	0	11.0181	0	0	0	0	0	0	0	0	33.124	0	0	11.8501	0	64.9159	0	1.58181	0	0	0	0	61.5723	3.71423	0
452	114.267	0	0	0	0	0	0	2.74835	21.1561	0	0	0	0	0	0	0	0	0	0	0	0	0	0	0	0	0	0	0	14.558	0	0	0	0	0	43.563	0	21.8829	0	0.987821	0	0	0	0	0	0	0	0	11.557	0
453	114.52	0	0	0.278532	0	0	0	0	0	0	0	0	0	0	0	0	0	0	0	0	0	0	0	0	0	0	0	0	10.9089	0	0	0	0	0	32.5166	0	0.85395	0	0	3.78318	0	31.7632	1.27535	0	0	0.414704	0	39.2154	0
454	114.774	0	0	0	0	0	0	0	0	0	0.694926	0	0	0	0	0	0	0	0	0	0	15.1295	0	0	0	0	0	0	1.38218	0	0	1.96467	0	0	50.5131	0	100.827	9.11981	0	43.2328	0	0	0	72.5342	0	0	0	10.7131	0
455	115.027	0	0	0	0	0	0	0	0	0	0	0	0	0	0	0	0	0	0	0	0	0	0	0	0	0	0	0	14.8856	0	0	0	0.0916548	0	18.0018	0	1.20626	0	0	3.46635	0	0	4.82393	0	0	9.11011	10.7484	0	0
456	115.28	0	0	0	0.736807	0	0	0	0.0934625	0	0.665537	0	0	0	0	3.38582	0	0	0	0	0	0	0	0	0	0	0	0	0	0	0	0	0	0	34.4468	0	18.4611	0	0	5.26174	0	0.893676	0	0	0	2.69756	0.71725	35.8941	0
457	115.534	0	0	0	0	0	0	0	0	0	0	0	0	0	0	0	0	0	0	0	0	0	0	0	0	0	0	0	0	0	0	0	0	0	479.608	0	0	0	0	0	0	0	21.749	0	0	0	1.99822	0	0
458	115.787	0	43.7257	1.68175	0	0.125634	0	0	0	0	0	0	0	0	0	25.8847	0	0	0	0	0	0	0	0	0	0	0	0	0	0	0	0	0	0	654.046	0	32.3805	0	0	480.039	0	37.9618	0	0	0	0	0	4.00773	0
459	116.041	0	0	0	0	0.120503	0	0	0.885691	0	0	0	0	0	0	0	0	0	0	0	0	0	0	0	0	0	0	0	2.62715	0	0	0	0	0	82.1462	0	6.05856	0.015535	0	35.468	0	0.862109	0	0	0	0	0	0	0
460	116.294	0	0	0	0	0	0	0	0	0	0	0	0	0	0	0	0	0	0	0	0	0	0	0	0	0	0	0.500723	0	0	0	0	0	0	83.6366	0	20.8667	0	0	25.9018	0	0	0	41.6573	0	0	0	0.844316	0
461	116.547	0	22.8531	0	0	0	0	2.30626	4.22495	0	0.501102	0	0	0	0	0	0	0	0	0	0	0.00288913	0	0	0	0	0	0	0	0	0	0	0	0	50.1656	0	0	0	0	8.15962	0	0.24515	0	4.09993	0	0	0	10.4017	0
462	116.801	0	0	0	0	0	0	0	0	0	0.0939874	0	0	0	0	0	0	0	11.4495	0	0	0	0	0	0	0	0	0	6.15936	0	0	0	0	0	35.732	0	0	0	0	1.24058	0	0	0	0	0	0	0	0	0
463	117.054	0	0	0	0	0	0	0	0.0919272	0	0	0	0	0	0	4.36542	0	0	0	0	0	0	0	0	0	0	0	0	0	0	0	0	0.0733412	0	656.984	0	1.80663	0.00447973	0	1553.2	0	0	0	0	0	133.351	10.535	41.3138	0
464	117.307	0	0	0	0	0	0	8.32023	0	0	0	0	0	0	0	0.241621	0	0	0	0	0	0	0	0	0	0	0	0	0.942925	0	0	0	0	0	51.0285	0	6.08367	0	0	2.8626	0	0	13.625	0	0	0	0.464494	10.0497	0
465	117.561	0	0	0	0	0	0	0	0	0	0.00195371	0	0	0	0	0.12786	0	0	0	0	0	0	0	0	0	0	0	0	1.53783	0	0	0	0	0	37.3493	0	4.73294	22.2614	0	20.7059	0	2.48701	0	0	0	0.14124	40.7836	33.3035	0
466	117.814	0	0	0	0	0	0	0	0	0	0	0	0	0	0	0	0	0	0	0	0	0	0	0	0	0	0	0	0	0	0	1.36852	1.95819	0	31.7951	0	0.273319	0	0	0	0	12.2172	0	0	0	2.81408	0	115.278	0
467	118.067	0	5.64488	0	0	0	0	4.63966	0	0	0	0	0	0	0	31.0887	0	0	0	0	0	0	0	0	0	0	0	0	0	0	0	0	0	0	50.8101	0	54.4517	0.569277	0	384.327	0	0	0	0	1875.13	0	0	3.57768	0
468	118.321	0	0	0	0	0	0	6.19113	0	0	0	0	0	0	0	0	0	0	12.6869	0	0	0	0	0	0	0	0	0	11.6285	0	0	0	0	0	40.1727	0	2.28687	26.627	0	15.7865	0	0	4.10693	0	0	0.656002	77.0356	0	0
469	118.574	0	0	0	0	0	1.43121	0	0.0921719	0	0	0	2.41525	0	0	4.76593	0	0	0	0	0	0	0	0	0	0	0	0	10.9967	0	0	0	0.0770355	0	920.444	0	2.66663	4.80314	0	10.4914	0	0	7.56802	0	0	0.178076	54.5845	10.1866	0
470	118.828	0	0	3.42703	0	0	0	0	0	0	0	0	0	0	0	0	0	0	0	0	0	0	0	0	0	0	0	0	0	0	0	0	0	0	1567.65	0	2.86526	0	0	0	0	0	0	0	0	0	10.0643	49.1283	0
471	119.081	0	0	0	0	0	0	0	0	0	0	0	2.06399	0	0	2.78824	0	0	0	0	0	0.107766	0	0	0	0	0	0.782133	17.1912	0	0	0	0	0	851.736	0	0	0	0	0	0	0	0	0	0	1.65307	0	8.92509	0
472	119.334	0	0	0	0	0	0	0	0	0	0	0	2.95703	0	0	0	0	0	0	21.7469	0	0	0	0	0	0	0	0	0	0	0	0	0	0	54.875	0	4.00732	52.0939	0	0	0	6.12001	0	0	0	0	0	0	0
473	119.588	0	3.43363	0	0	0	0	2.92045	0	0	0	0	2.72791	0	0	0	0	0	0	0	0	0	0	0	0	0	0	0	0	0	0	0	0	0	23.4954	0	2.54041	0.0047639	0	0	0	1.75835	2.67202	0	0.532436	0	0.109309	0	0
474	119.841	0	0	0	0	0	0	0.48938	0	0	0	0	0	0	0	19.4673	0	0	0	0	0	0	0	0	0	0	0	0	0	0	0	0	0	0	890.811	0	0	0	0	423.116	0	0	0	0	0	0.540681	0	15.5773	0
475	120.094	0	1.92196	0	0	0	0	3.65983	0.128183	0	0	0	0	0	0	1.23776	6.98614	0	0	0	0	0	0	0	0	0	0	0	0	0	0	0	0.117128	0	33.7474	0	0	0	0	13.1915	0	0	11.0135	0	0	0.489451	0	19.0506	0
476	120.348	0	0	0.0657829	0	0	0	0	0	0	0	0	0	0	0	9.37179	0	0	5.42675	0	0	0	0	0	0	0	0	0	0	0	0	0	0	0	6.23642	0	34.5947	0.758787	0	1495.47	0	8.05391	8.2393	0	1.71852	0	156.225	4.5969	0
477	120.601	0	0	0	0	0	0	8.37478	0	0	0.0242355	0	0	0	0	0.790153	0	0	0	0	5.47429	0	0	0	0	0	0	0	0	0	0	0	0	0	2644.19	0	20.1331	0	0	3.42343	0	0	0	0	0	0	0	0.0704797	0
478	120.854	0	0	0	0	0	0	2.87201	0.112131	0	0	0	0	0	0	55.2741	0	0	0	0	0	0	0	0	0	0	0	0	0	0	0	0	0	0	16.0567	0	33.4552	0.438145	0	3.70479	0	6.63992	7.49047	0	0	4.86287	10.8359	2.06745	0
479	121.108	0	0	0	0	0	0	0	0.0775368	0	0	0	0	0	0	0	0	0	0	0	0	0	0	0	0	0	0	0	0	1.21605	0	0	0	0	1.39942	0	34.4209	2.3923	0	0	0	0	4.50457	0	0	0.997314	0	0	0
480	121.361	0	0	0	1.19488	0	0	0	0	0	0	0	0	0	0	0	0	0	0	0	0	0	0	0	0	0	0	0	0	0	0	0	0	0	47.5104	0	1.99672	7.70438	0	21.3792	0	47.9191	4.20153	0	0	0	0	0.966307	0
481	121.615	0	0	0.00288518	0	0	0	0	0	0	0	0	0	0	0	0	0	0	0	24.8779	0	0	0	0	0	0	0	1.86285	0	0	0	0	0	0	8.92023	0	0	0	0	0	0	0	14.4723	0	0	0	0	1.08168	0
482	121.868	0	0	0	0	0	0	0	0	0	0	0	0	0	0	3.81009	0	0	0	0	0	0	0	0	0	0	0	0	2.11046	0	0	0	0	0	16.5202	0	7.36953	0	0	3.45366	0	0	0	0	0	3.01932	0	0	0
483	122.121	0	0	0	0	0	0	0	1.75205	0	0	0	0	0	0	8.57322	0	0	0	0	0	0	0	0	0	0	0	0	0.452946	0	0	0	0	0	8.85974	0	0	0	0	18.3594	0	0	4.62101	0	1.34089	0	0	0	0
484	122.375	0	0	0	0	0	0	0	0	0	0	0	0	0	0	0	8.94636	0	0	0	0	0	0	0	0	0	0	0	1.36522	0	0	1.15435	0	0	1003.14	0	0.0264284	24.6726	0	8.39819	0	0	0	0	0	0	26.4896	0	0
485	122.628	0	0	0	0	0	0	0	0	0	0	0	0	0	0	0	0	0	12.1651	0	0	0	0	0	0	0	0	0	1.12433	0	0	0	0	0	1144.03	0	37.2593	0.00608611	0	429.226	0	0	0	0	0	0	0	0	0
486	122.881	0	3.43995	0	0	0	0	3.91845	0	0	0	0	0	0	0	0.247356	0	0	5.69467	0	0	0	0	0	0	0	0	0	1.21543	0	0	0	0.0807614	0	28.2908	0	36.1706	6.20418	0	14.0194	0	7.13544	17.7226	0	1.30713	2.27899	11.0017	0	0
487	123.135	0	0	0	0	0	0	0	0	0	0	0	0	0	0	0	0	0	0	0	0	0	0	0	0	0	0	0	12.8029	0	0	0	0	0	1132.36	0	0	0.00277072	0	15.9199	0	0	0	0	0	0	0	0	0
488	123.388	0	0	3.99736	0	0	0	0	28.6006	0	0	0	0	0	0	0	0	0	0	0	0	0	0	0	0	0	0	0	0	0	0	0	0	0	160.766	0	13.6292	3.37099	0	16.9641	0	2.88123	0	19.7967	0	0	0.512493	4.3426	0
489	123.641	0	1.9803	0	0	0	0	5.13025	0	0	0	0	0	0	0	0.641955	0	0	0	0	0	0	0	0	0	0	0	0	0	0	0	0	0.0795615	0	0.400235	0	3.45687	0	0	7.99177	0	10.8485	0	0	2.17724	0	0	0	0
490	123.895	0	0	0	0	0	0	5.14398	0	0	0	0	0	0	0	0	0	0	0	0	0	0	0	0	0	0	0	0	13.1084	0	0	0	0.0931625	0	12.0844	0	0	7.81889	0	8.93082	0	0	0	0	3.04003	0	0	1.29932	0
491	124.148	0	2.94515	0	0	0	0	4.88609	30.3926	0	0	0	0	0	0	0	0	0	0	0	0	0	0	0.311134	0	0	0	0	0.514821	0	0	0	0.0789182	0	1104.27	0	3.47655	0	0	12.473	0	2.0874	42.3288	0	0	0	0	10.0531	0
492	124.402	0	0	0	0	0	0	0	0	0	0	0	0	0	0	3.60459	0	0	0	0	0	0	0	0	0	0	0	0	4.46043	0	0	0	0	0	0	0	0.568424	0.00582562	0	13.4379	0	0	0	0	0	0	0	0.4819	0
493	124.655	0	5.26054	0	0	0	0	0	0	0	0	0	0	0	0	0.79361	0	0	0	0	0	0	0	0	0	0	0	0	10.1636	1.16007	0	0	0	0	31.9836	0	0.139965	14.1864	0	33.5472	0	0	3.17167	0	0	0.149319	0.8684	16.0329	0
494	124.908	0	0	0	0	0	0	0	0	0	0	0	0	0	0	0	0	0	0	0	0	0	0	0	0	0	0	0	0	0	0	0	0	0	17.3862	0	4.95772	0	0	16.9703	0	0	3.34638	1.31109	0	0	0	3.61906	0
495	125.162	0	0	0	0	0	0.0145956	3.54763	0	0	0	0	0	0	0	0	0	0	8.63665	0	0	0	0	6.21786	0	0	0	0	0	0	0	0	0.0973423	0	1.46918	0	21.9004	8.07321	0	1229.95	0	0	0	0.00144456	16.4484	25.1922	0	0	0
496	125.415	0	0	0	0	0	0	0	0	0	0	0	0	0	0	11.315	0	0	0	0	0	0	0	0	0	0	0	0	0	0	0	0	0	0	0	0	0.631472	0	0	16.9001	0	0	0	0	0.639531	0	0	1.8218	0
497	125.668	0	3.0847	0	0	0	0	0	30.0989	0	0	0	0	0	0	0	0	0	0	0	0	0	0	92.1545	0	0	0	0	0	0	0	0	0	0	260.856	0	93.3578	0	0	40.3442	0	0	3.72392	0	0	0	0	0	0
498	125.922	0	0	0	0	0	0	0	0	0	0	0	0	0	0	2.69925	0	0	0	0	0	0	0	0	0	0	0	0	0	0	0	0	0.0827309	0	10.4005	0	0	0	0	0.420633	0	0	0	0	0	0	0.636169	2.08213	0
499	126.175	0	0	0	0	0	0	0	0	0	0	0	0	0	0	0	0	0	0	0	0	0	0	0	0	0	0	0	0	0	0	0	0	0	17.9155	3.1476	0	1.30078	0	0	0	3.2509	0	0	0	0	183.993	2.5612	0
500	126.428	0	2.61359	0	0	0	0	0	1.67095	0	0	0	0	0	0	0	0	0	0	0	0	0	0	100.404	0	0	0	0	0.992933	0	0	0	0.0841044	0	940.069	0	2.22576	9.72531	0	0	0	0	7.03888	0	0	0	0	0	0
501	126.682	0	0	0	0	0	0	0	0	0	0	0	2.26004	0	0	0	0	0	0	0	0	0	0	0	0	0	0	0	0	0	0	0	0.180957	0	2.58152	0	2.30618	0	0	0.0232078	0	4.01113	0	0	0	0	40.6473	5.19744	0
502	126.935	0	0	0	0	0	0	0	0	0	1.49896	0	0	0	0	0	0	0	0	0	0	0	0	0	0	0	0	0	0.621095	0	0	0	0	0	14.725	0	0	0	0	0	0	0.0155271	0	8.23763	0	0	0	0	0
503	127.189	0	0	0	0	0	0	0	0	0	0	0	0	0	0	0	0	0	0	0	0	0	0	0	0	0	0	0.00288913	0.774602	0	0	0	0	0	1351.08	0	1.16962	0	0	12.7845	0	0	0	0	0	0	0	8.42336	0
504	127.442	0	0	0	0	0	0	4.72275	0	0	0.0567761	0	0	0	0	0	0	0	0	0	0	0	0	0	0	0.293025	0	0	0	0	0	0	0.0827901	0	6.40196	0	0	0	0	0	0	0	0	0	0	0	0	0	0
505	127.695	0	0	0	0	0	0	0	0	0	0	0	0	0	0	0	0	0	0	0	0	0	0	0	0	0	0	0	0.656274	0	0	0	0	0	6.79815	0	32.9147	5.67143	0	2.5916	0	0	0	0	0	2.72747	0	3.73832	0
506	127.949	0	135.144	0	0	0	0	0	0	0	0	0	0	0	0	0	0	0	0	0	0	0	0	0	0	0	0	0	7.47011	0	0	0	0.0807022	0	1241.09	0	2.06242	0	0	85.3586	0	0	3.02537	0	0	0	0	10.1766	0
507	128.202	0	2.10533	0	0	0	0	0	0	0	0	0	0	0	0	0	0	0	0	0	0	0	0	0	0	0	0	0	0.217782	0	0	0	0	0	913.075	0	0.0688339	0	0	0	0	0.51792	0	1.66218	0	0.163003	0	0	0
508	128.455	0	2.06159	0	0	0	0	0.455634	0	0	0	0	0	0	0	0	0	0	0	0	0	0	0	0	0	0	0	0	0	0	0	0	0	0	0.32033	0	5.12083	0.821614	0	0.617973	0	0	0	0	0	0	11.3303	2.93719	0
509	128.709	0	2.70905	0	0	0	0	0	0	0	0	0	0	0	0	0	0	0	0	0	0	0	0	0	0	0	0	0	4.50358	0	0	0	0	0	40.6108	0	64.0571	0	0	0	0	0	0	0	0	0	0	20.3157	0
510	128.962	0	0	0	0	0	0	0	0	0	0.076179	0.165407	0	0	0	0.195217	0	0	0	0	0	0	0	0	4.20966	0	0	0	0.78518	0	0	0	0	0	129.295	0	2.44811	0	0	0	0	0	0	0	0	0.549905	0	1.07707	0
511	129.215	0	0	0	0	0	0	0	0	0	0	0	0	0	0	0	0	0	0	0	0	0	0	107.349	0	0	0	0	0	0	0	0	0	0	7.10559	0	3.51107	0	0	3.38357	0	0	0	0	0	0	0	11.5092	0
512	129.469	0	125.582	0	0	0	0	0	0.0665841	0	0.958713	0	0	0	0	0	0	0	0	0	0	0	0	0	0	0	0	0	3.24498	0	0	0	0	0	42.7085	0	10.4836	0	0	2.60559	0	0	8.17242	0	1.48205	0	0.49577	27.1574	0
513	129.722	0	0	0	1.72454	0	0	0	0	0	0.80598	0	0	0	0	0.058118	0	0	0	7.76444	0	0	0	0	0	0	0	0	0	0	0	0	0	0	12.8292	0	0	10.828	0	8.83425	0	0	0	0	0	22.4882	0	0	0
514	129.976	0	4.69334	0	0	0	0	2.31999	0	0	1.01551	0	0	0	0	8.82505	0	0	0	11.4905	0	0	0	0	4.07742	0	0	0	10.1057	0	0	0	0	0	1375.75	0	0	0	0	863.794	0	0	3.32719	0.742316	0	0	0	8.63305	0.466136
515	130.229	0	0	0	0	0	0	0.516207	0	0	0	0	0	0	0	0	0	0	0	0	0	0	0	0	0	0	0	0	0.450057	0	0	0	0.732895	0	1.25997	0	2.23298	0.571195	0	0	0	0	0	0	0	162.09	0	0	0
516	130.482	0	0	0	0	0.16706	0	0	0	0	0	0	0	0	0	0	0	0	0	0	0	0	0	0	0	0	0	0	3.21262	0	0	0	0	0	4.6579	0	0	0	0	25.3549	0	0	5.32868	0	4.21538	0	0	2.16923	0
517	130.736	0	0	0	0	0	0	0	0	0	0	0	0	0	0	3.70607	0	0	0	0	0	0	0	0	0	0	0	0	0	0	0	0	0	0	6.7375	0	0	0	0	1.55312	0	0	0	0	0	2.66815	9.45108	4.5257	0.814999
518	130.989	0	0	0	0	0	0	3.46985	0	0	0	0	0	0	0	0	0	0	0	0	0	0	0	0	0	0	0	0	2.31266	0	0	0	0	0	2831.78	0	7.44536	0	0	5.81717	0	1.22048	3.81533	0	29.8934	28.7932	0	14.2471	0
519	131.242	0	4.7302	0	0	0	0	0.468804	0	0	0	0	0	0	0	0	0	0	0	0	0	0	0	0	0	0	0	0	0	0	0	0	0	0	8.45876	0	0	0.00126301	0	42.3986	0	0	0	0	0	0	0	0	0
520	131.496	0	5.09501	0	0	0	0	0	0.852344	0	0	0	0	0	0	0	0	0	0	0	0	0	0	0	0	0	0	0	4.88282	0	0	0	0.0476825	0	1760.59	0	4.67506	2.0129	0	10.3986	0	0	0	0	0	0	0	2.61008	0
521	131.749	0	0	0	0	0	0	0	0	0	2.09887	0	0	0	0	0	0	0	0	0	0	0	0	0	0	0	0	0	0.50334	0	0	0	0	0	0.997637	0.0170861	9.9278	0	0	29.0163	0	1.35568	1.46984	0	0	156.156	0	31.6984	0
522	132.002	0	0	0	0	0	0	0	0	0	0	0	0	0	0	0	0	0	0	0	0	0	0	0	0	0	0	0	9.23679	0	0	0	0	0	8.51743	0	0	0.00417187	0	0	0	59.2367	0	0	0	0	0	0	0
523	132.256	0	0	0	0	0.893881	0	0	0	0	0	0	0	0	0	0	0	0	0	0	0	0	0	0	0	0	0	0	0	0	0	0	0	0	4.13622	0	4.70244	0	0	1.49178	0	5.55667	0	0	0	0.503971	0.690458	0	0
524	132.509	0	0	0	0	0	0	0	0	0	0	0	0	0	0	30.3556	0	0	0	0	0	0	0	0	0	0	0	2.4722	0	0	0	0	0.161448	0	36.5724	0	0	0	0	11.6532	0	0	0	0	0	0	1.97252	15.8213	0
525	132.763	0	41.9679	0.316261	0	0	0.689183	1.79105	0	0	0	0	0	0	0	0	0	0	0	0	2.86341	0	0	0	0	0	0	0	0	0	0	0	0	0	77.854	0	0	0	0	38.4115	0	0	0	0	0	2.21326	0	0	0
526	133.016	0	0	0	0	0	0	0	0	0	0	0	0	0	0	0	0	0	0	0	0	0	0	0.0294083	0	0	0	0	0	0	0	0	0	0	16.6853	0	3.31233	0.623412	0.133306	17.8912	0	0	0	0	0	0	1.0054	4.95347	0
527	133.269	0	60.9776	1.34129	0	0	0	1.83376	0.0922508	0	0	0	0	0	0	0	0	0	6.18446	0	0	0	0	0	0	0	0	0	17.1167	0	0	0	0	0	0.301851	0	1.63756	0	0	27.1404	0	0	0.122709	0	1.66094	0	12.2318	2.85748	0
528	133.523	0	36.5611	0	0	0	0	0	6.15243	0	0	0	0	0	0	0	0	0	0	0	0	0	0	0	0	0	0	0	0	0	0	0	0.16264	0	16.2762	0	1.26371	0	0	862.674	0	0	0.305584	0	0.62655	0	0	0	0
529	133.776	0	0	0	0	0	0	0.963828	0	0	0.0272336	0	0	0	0	0	0	0	0	0	0	0	0	0	0	0	0	0	0	0	0	0	0	0	7.63625	0	0	5.63779	0	7.54677	0	0	5.44735	0	0	0.133906	14.1445	0	0
530	134.029	0	12.8984	0	0	0	0	1.88261	0	0	0	0	0	0	0	0	0	0	0	0	0	0	0	0	0	0	0	0	0	0	0	0	0	0	255.025	0	0.494755	0	0	0	0	0	6.15762	0	0	0	0	0.281564	0
531	134.283	0	0	0	0	0	0	0	0.111764	0	0	0	0	0	0	4.32791	0	0	0	0	0	0	0	0	4.79038	0	0	0	0	0	0	0	0	0	2009.7	0	255.138	14.9179	0	1.48045	0	0.0308213	0	0	0	0.11937	4.54316	25.4145	0
532	134.536	0	0	0	0	3.34467	11.6006	0	0	0	0	0	0	0	0	0	0	0	0	0	0	0	0	0	4.64219	0	0	0	0	0	0	0	0	0	0	0	7.13214	0	0	808.729	0	10.6215	0	0	0	0	0	0	0
533	134.789	0	0	0	0	0	0	4.24664	0	0	0	0	0	0	0	0.616343	0	0	0	0	0	0	0	0	0	0	0	0	0	0	0	0	0.0968687	0	2037.77	0	0.418801	0.888667	0	36.0259	0	0.0157284	0.370535	0	2.04323	0	0.698238	0.00548619	0
534	135.043	0	23.6308	0	0	0	0	0	0	0	0	0	0	0	0	0	0	0	0	0	0	0	0	0	0	0	0	0	0	0	0	0	0	0	0.101183	0	0	0.00039469	0	0	0	0	0	0	0	0	0	5.06072	0
535	135.296	0	90.6097	0	0	0	0	0	0.106329	0	0.107798	0	0	0	0	0.519176	0	0	0	0	0	0	0	0	0	0	0	0	12.4558	0	0	0	0	0	1354.14	0	1.71473	0	0	8.84731	0	0	0	0	0	0.33238	0.885715	2.15303	0
536	135.55	0	0	0	0	0	0	0	0	0	6.64479	0	0	0	0	0	0	0	2.79882	0	0	0	0	0	0	0	0	0	0	0	0	0	0	0	13.2294	0	0	0	0	38.6764	0	0	0	0	0	0	0	0	0
537	135.803	0	0	0.00288913	0	0	0	0	0	0	0	0	0	0	0	0	0	0	0	0	0	0	0	0	0	0	0	0	0	0	0	0	0	0	158.281	0	5.40458	0	0	0	0	0	0	4.19139	0	0	0	0	0
538	136.056	0	7.31299	0	0	0	0	0.944591	0	0	4.12302	0	2.16269	0	0	0	0	0	0	0	0	0	0	0	0	0	0	0	1.23292	0	0	0	0	0	6.28235	0	17.3931	0.00137352	0	1.73481	0	0	4.17556	0	27.9579	0	0.919643	8.96223	0
539	136.31	0	0	0	0	0	11.7057	0	0	0	0	0	3.25499	0	0	0	0	0	0	0	0	0	0	0	0	0	0	0	2.58064	0	0	0	0	0	1440.05	0	0.347903	39.0521	0	0	0	0	0	0	0	0	0	5.95607	0
540	136.563	0	8.85923	0	0	0	0	0.932348	0	0	0	0	0	0	0	0	0	0	0	0	0	0	0	0	0	0	0	0	0	0	0	0	0.0759501	0	3.56081	0	0.854826	0	0	0.956676	0	9.85732	0	0	0.570658	0	109.991	0.439052	0
541	136.816	0	47.6873	0	0	0	0	0	0	0	0	0	0	0	0	0	0	0	0	0	0	0	0	0	0	0	1.54686	0	0	0	0	0	0.0870093	0	0	0	0	0	0	16.8467	0	0	0	0	0	0	0	6.58821	0
542	137.07	0	10.2672	0	0	0	0	0.478269	0	0	0.0156889	0	0	0	0	0	0	0	0	0	0	0	0	0	0	0	0	0	0	0	0	0	0	0	1.17727	0	0	0.844052	0	0	0	0	2.14397	0	0	0.609859	0	8.11331	0
543	137.323	0	0	0	0	0	0	0	0	0	0	0	0	0	0	0	0	0	0	0	0	0	0	0	0	0	0	0	0.307988	0	0	0	0	0	5.34732	0	0	0	0	39.1435	0	17.4727	2.11729	0	0	0.028544	0	2.57092	0
544	137.576	0	6.31569	0	0	0	0	0.587697	0	0	0	0	0	0	0	0	0	0	0	0	0	0	0	0	0	0	0	0	0	0	0	0	0	0	683.797	0	19.134	0	0	36.7526	0	0	0	0	0	0	0	9.1546	0
545	137.83	0	72.3969	0	0	0	0	0	0	0	0	0	0	0	0	0.400002	0	0	0	0	0	0	0	0	0	0	0	0	0	0	0	0	0	0	2.35743	0	2.72644	0	0	749.476	0	0	0	0	0.867023	0	0.653057	0	0
546	138.083	0	0	0.508652	0	0	0	0.980208	0	0	0	0	0	0	0	0.83971	0	0	0	0	0	0	0	0	0	0	0	0	4.95791	0	0	0	0	0	0.496733	0	0	0	0	0	0	3.84026	0	0	0	0	2.7546	30.3636	0
547	138.337	0	0	0	0	0	0	0	0	0	0	0	0	0	0	0.166902	0	0	0	0	0	0	0	0	0	0	0	0	0.585881	0	0	0	0	0	6.38161	0	5.97969	0	0	0	0	0	0	0	0	0	0	32.0255	0
548	138.59	0	1.35732	0	0	0	0	0.647844	0	0	0.0380994	0	2.74642	0	0	8.32027	0	0	0	0	0	0	0	0	0	0	0	0	0	0	0	0	0	0	9.17477	0	16.7652	0.0657079	0	0	0	0	0	0	0	0	0	0.931183	0
549	138.843	0	0	0	0	0	0	0	0	0	0	0	0	0	0	0	0	0	0	0	0	0	0	0	0	0	0	0	0	0	0	0	0	0	11.3516	0	3.17322	0	0	0	0	0	0	0	0	0	0	0.65346	0
550	139.097	0	0	0	0	0	0	0	0	0	0	0	0	0	0	0	0	0	0	0	0	0	0	0	0	0	0	0	10.2131	0	0	0	0	0	1.31231	0	0	0	0	0	0	1.98116	0	0	0	0	0	4.04465	0
551	139.35	0	16.2359	0	0	0	0	0.78398	0	0	0.0568511	0	0	0	0	0	0	0	0	0	0	0	0	0	0	0	0	0	0	0	0	1.25386	0.449674	0	5.93301	0	0	0	0	68.5806	0	0	0	0	0	0	0	0	0
552	139.603	0	0	0	0	0	0	1.2478	0	0	0	0	0	0	0	0	0	0	0	0	0	0	0	0	0	0	0	0	0.446958	0	0	0	0	0	0	0	0	0.00155113	0	8.8572	0	0	0	3.13418	0	0	0	1.07249	0
553	139.857	0	0	0	0	0	0	0	0	0	0	0	0	0	0	0	0	0	0	0	0	0	0	0	0	0	0	0	0.340147	0	0	0	0	0	18.1127	0	0	0	0	20.8168	0	0	0	0	0	1.67304	0	0	0
554	140.11	0	10.7016	0	0	0	0	0.726217	0	0	0	0	0	0	0	0	0	0	0	0	0	0	0	0	0	0	0	0	0	0	0	0	0	0	3.37507	0	4.16568	0	0	0	0	0	0	0	0	0	0	0	0
555	140.363	0	21.0479	0	0	0	1.11258	0	0	0	0.247072	0	0	0	0	0	0	0	0	0	0	0	0	0	0	0	0	0	6.38497	0	0	0	0	0	9.85574	0	0.071794	0.000532831	0	9.43912	0	0	0	0	0	0	77.613	0	0
556	140.617	0	0	0	0	0	0	0.527799	0	0	0	0	0	0	0	0	0	0	0	0	0	0	0	0	0	0	0	0	2.31735	0	0	0	0	15.0337	6.99216	0	0	0	0	0	0	0	0	0	0	0.205097	0	1.28223	0
557	140.87	0	0	0	0	0	0	0	0	0	0	0	0	0	0	0	0	0	0	0	0	0	0	0	0	0	0	0	0	0	0	0	0	0	5.20801	0	0	9.28481	0	0	0	1.36191	0	0	1.1081	1.78054	0	1.11775	0
558	141.124	0	0	0	0	0	0	0	0	0	0	0	0	0	0	0	0	0	0	0	0	0	0	0	0	0	0	0	0	0	0	0	0	0	1.15669	0	0	0	0	10.3398	0	0	0	0	0	0	0	38.5069	0
559	141.377	0	0	0.587878	0	0	0	0	0	0	0	0	0	0	0	5.62915	0	0	0	0	0	0	0	0	0	0	0	0	0	0	0	0	0	0	0	0	4.86249	7.34863	0	15.4818	0	0	0	0	6.3542	0	0	45.2763	0
560	141.63	0	0	0	0	0	0	0	0	0	0	0	0	0	0	0	0	0	0	0	0	0	0	0	0	0	0	0	0	0	0	0	0	0	0	0	2.41347	0	0	0	0	0	0.406743	0	0	0	0	0	0
561	141.884	0	6.56494	0	0	0	0	0	0	0	0	0	0	0	0	0	0	0	0	0	0	0	0	0	4.18067	0	0	0	3.7062	0	0	0	0	0	22.4417	0	0	0	0	0	0	0	5.32998	0	216.555	0	0	35.7309	0
562	142.137	0	0	0	0	0	0	0	0	0	0	0	0	0	0	0	0	0	0	0	0	0	0	0	0	0	0	0	0	0	0	0	0	0	1.31353	0	0	0	0	0	0	0	0	0	0	0	0	0	0
563	142.39	0	6.39466	0	0	2.87969	0	0	0	0	0	0	0	0	0	0	0	0	0	0	0	0	0	0	0	0	0	0	8.10577	0	0	0	113.31	0	8.77165	0	4.74441	0.00563222	0	0	0	47.9527	0	0	271.501	0	21.3222	0	0
564	142.644	0	0	0	0	0	0	0	0	0	0	0	0	0	0	0	0	0	0	0	0	0	0	0	0	0	0	0	0	0	0	0	0	0	85.1079	0	0.033296	0	0	6.7132	0	0	0	0	1.24174	0	0	12.7971	0
565	142.897	0	1.04806	0.916935	0	0	0	1.36837	0	0	0	0	0	0	0	0	0	0	0	0	0	0	0	0	0	0	0	0	0	0	0	0	0	0	4.73731	0	6.78776	0	0	5.41691	0	0	0	0	0	0.51955	0	4.43656	0
566	143.15	0	5.22199	0	0	0	0	0	0	0	0	0	0	0	0	0	0	0	0	0	0	0	0	0	0	0	0	0	0.57813	0	0	0	0	0	66.2771	0	0	6.87221	0	1.71628	0	0	0	1.7558	0	0	0	2.60251	0
567	143.404	0	0	0	0	0	0	0	0	0	0	0	0	0	0	0	0	0	0	0	0	0	0	0	0	0	0	1.56275	0	0	0	0	0.0840728	0	5.96132	0	38.0627	0	0	0	0	0	0	0	0	0	0	0	0
568	143.657	0	0	0	0	0	0	0	0	0	0.304807	0	0	0	0	0	0	0	0	0	0	0	0	0	0	0	0	0	0	0	0	0	0	0	0.243231	0	16.6839	3.1209	0	0	0	0	0	2.11946	1.5365	1.64363	77.1319	5.20151	0
569	143.911	0	0	0	0	0	0	0	0	0	0	0	0	0	0	0	0	0	0	0	0	0	0	0	0	0	0	0	0.392503	0	0	0	0	0	0.481979	0	0	0	0	0	0	0	0.227033	0	1.67627	0	0	0	0
570	144.164	0	2.32672	0	0	0	0	0	0	0	0	0	0	0	0	0	0	0	0	0	0	0	2.20305	0	0	0	0	0	0	0	0	0	0	0	0.234923	0	30.346	0	0	0	0	2.31647	0	0	0	0	0	0	0
571	144.417	0	0	1.15825	0	0	0	0	0	0	0	0	0	0	0	0	0	0	0	0	0	0	0	0	0	0	0	0	9.77613	0	0	0	0	0	0	0	0	0	0	12.0859	0	0	0	0	0	0	0	0	0
572	144.671	0	1.56545	0	0	0	0	0	0	0	0	0	0	0	0	0	0	0	0	0	0	0	0	0	0	0	0	0	0	0	0	0	0.122516	0	0.738397	0	0	0.0143509	0	77.329	0	0	2.67907	0	0	0	0.954766	26.9297	0
573	144.924	0	0	0	0	0	0	0	0	0	0	0	2.18305	0	0	0	0	0	0	0	0	0	0	0	0	0	6.61034	0	7.66496	0	0	0	0	0	0	0	16.6974	0	0	37.2016	0	0	0	0	114.946	0	0	0.888683	0
574	145.177	0	0	0	0	0	0	0.98627	0	0	0	0	0	0	0	0	0	0	0	0	0	0	0	0	0	0	0	0.0689247	0	0	0	0	0	0	2.92603	0	1.21229	0	0	0	0	0	5.97905	0	1.1081	0.095211	0	6.92202	0
575	145.431	0	0	0	0	0	0	0	0	0	0	0	0	0	0	0	0	0	0	0	0	0	0	0	0	0	0	0	0	0	0	0	0	0	0.502025	0	0	0	0	27.1874	0	0	0	5.23955	0	0	0	3.08699	0
576	145.684	0	26.8377	0	0	0	0	0	0	0	0	0	0	0	0	0	0	0	0	0	0	0	0	0	0	0	0.376747	0	0	0	0	0	0	0	15.6677	0	38.4485	0	0	29.9715	0	0.484557	0	0	0	0.162115	0.251954	0	0
577	145.937	0	0	0	0	0	0	0	0	0	0	0	0	0	0	0	0	0	0	0	0	0	0	0	0	0	0	0	0	0	0	0	0.0617531	0	26.2793	0	4.53959	0	0	0	0	0	0	0	1.16421	0	0	50.7202	0
578	146.191	0	1.08668	0	0	0	0	0	141.735	0	0	0	0	0	0	0	0	0	0	0	0	0	0	0	0	0	0	1.0228	0	0	0	0	0	0	0	0	0	0	0	33.4268	0	3.09296	0	0	0	0	0	0	0
579	146.444	0	0	0	0	0	0	0	0	0	0	0	0	0	0	0	0	0	0	0	0	0	3.09379	0	0	0	0	0	10.017	0	0	0	0	0	16.2091	0	0	0	0	0	0	0	1.59547	0	0.976573	0	0	26.2716	0
580	146.698	0	4.21281	0	0	0	0	0	0	0	0	0	0	0	0	0	0	0	0	0	0	0	0	0	0	0	0	0	0	0	0	0	0	0	0.803028	0	0	0	0	0	0	0	0	0	0	0	0	1.29551	0
581	146.951	0	33.8106	0	0	0	0	0	0	0	0	0	0	0	0	0	0	0	0	0	0	0	0	0	0	0	0	0	0	0	0	0	0	0	0.271049	0	2.13477	0.0471023	0	5.21112	0	0	0.233159	0	0	0	0	15.0122	0
582	147.204	0	0	0	0	0	0	0	0	0	0	0	0	0	0	0	0	0	0	0	0	0	0	0	0	0	0	0	0	0	0	0	0	0	0.247273	0	0	1.46259	0	0	0	0	0	2.72033	0	0	1.82646	0	0
583	147.458	0	0	0.52727	0	0	0	0	0	0	0	0	0	0	0	0	0	0	0	0	0	0	0	0	0	0	0	0	6.86531	0	0	0	0	0	0	0	0.0123419	0.228687	0	0	0	0	0	0.447025	0	0.503028	1.47203	94.4011	0
584	147.711	0	19.1241	0	0	0	0	0	0	0	0	0	0	0	0	0	0	0	0	0	0	0	0	0	0	0	0	0	0	0	0	0	0	0	20.2273	0	0	0.40102	0	0	0	5399.94	0	0	0	0	0	0	0
585	147.964	0	0	0	0	0	0	0	0.0899892	0	0	0	0	0	0	1.43603	0	0	0	0	0	0	0	0	0	0	0	0	0	0	0	0	0	0	26.95	0	1.98604	0	0	12.9122	0	0	0	0	0	0	0	0	0
586	148.218	0	0	0	0	0	0	0.938785	0	0	0	0	0	0	0	0	0	0	0	0	0	0	0	0	0	0	0	0	0	0	0	0	0	0	0.241874	0	24.9347	0.522612	0	0	0	0	0	0	0	0	0	2.71469	0
587	148.471	0	12.1906	1.47807	0	0	0	0	0	0	0	0	0	0	0	0	0	0	0	0	0	0	0	0	0	0	0	0	0	0	0	0	0	0	20.2419	0	0	0	0	19.8904	0	0	0	0	0	0	0	139.772	0
588	148.724	0	1.47874	0	0	0.293653	0	0	0	0	0	0	0	0	0	0	0	0	0	0	0	0	0	0	0	0	0	0	0	0	0	0	0	0	20.5875	0	0	0	0	0	0	0	0	0	0	0	0	0	0
589	148.978	0	0	0	0	0	0	0	0	0	0	0	0	0	0	0	0	0	0	0	0	0	0	0	0	0	5.83558	0	0	0	0	0	0	0	12.7149	0	0	0	0	0	0	0	0	0	0	0	0	0	0
590	149.231	0	15.3867	0.323503	0	0	0	0	0	0	0.00240761	0	0	0	0	0	0	0	0	0	0	0	0	0	0	0	0	0	0	0	0	0	0	0	0	0	0	0	0	21.8345	0	2.05404	0.228083	0	0	0	0	0	0
591	149.485	0	8.03135	0	0	0	0	1.82089	0	0	0.011667	0	0	0	0	1.01649	0	0	0	0	0	0	0	0	0	0	0	0	0	0	0	0	0	0	4.966	0	0	0	0	0	0	0	0	2.70536	0	0	0	4.52812	0
592	149.738	0	11.1346	0	0	0	0	0	0	0	4.63526	0	0	0	0	0	0	0	0	0	0	0	0	0	0	0	0	0	0	0	0	0	0	0	0	0	0	0	0	0	0	0	0.278193	0	0	5.2104	0	13.8843	0
593	149.991	0	9.30451	0	0	0	0.859066	0	0	0	0	0	0	0	0	0	0	0	0	0	0	0	0	0	0	0	0	0	0	0	0	0	0	0	0.0113907	0	0.00144062	0.0643384	0	0.11047	0	0.0653882	0	0	0	0	0	0	0
594	150.245	0	6.31396	0	0	0	0	3.03547	0	0	0	0	0	0	0	0	0	0	0	0	0	0	0	0	0	0	0	0	0	0	0	0	0	0	0	0	0	0	0	0	0	0	0	0	0	2.17567	0	0	0
595	150.498	0	0	0	0	0	0	0.879957	0	0	0	0	0	0	0	0	0	0	0	0	0	0	0	0	0	0	0	0	0	0	0	0	0.0841005	0	0.232449	0	0	0	0	3.07608	0	0	0	0	0.855253	0	0	0	0
596	150.751	0	0	0	0	0	0	0	0	0	0	0	0	0	0	0.222783	0	0	0	0	0	0	3.09379	0	0	0	0	0	0	0	0	0	0.0656842	0	17.3783	0	1.07778	0	0	0	0	0	0	0	0	0	0.280707	33.8129	0
597	151.005	0	0	0	0	0	0	0	0	0	0	0	0	0	0	0	0	0	0	0	0	0	0	0	0	0	0	0	0	0	0	0	1.71379	0	4.07894	0	0.449488	0	0	3.30766	0	0	0.21414	0	0.930469	26.3662	0	4.50001	0
598	151.258	0	8.12038	0	0	0	0	0	0	0	0	0	0	0	0	0	0	0	0	0	0	0	0	0	0	0	0	0	0	0	0	0	0	0	5.11257	0	9.37215	0	0	0	0	0	5.04223	0	0	0	0.844782	2.90949	0
599	151.511	0	63.6589	0	0	0	0	0	0	0	0.0253904	0	0	0	0	0	0	0	0	0	0	0	0	0	0	0	0	0	0	0	0	0	0	0	2.49361	0	0	0	0	0	0	0	0	0	0	5.08281	0	0	0
600	151.765	0	15.7911	0	0	0	0	0	0	0	0	0	0	0	0	0	0	0	0	0	0	0	0	0	0	0	0	0	7.45551	0	0	0	0	0	22.7599	0	1.3671	0	0	3.18451	0	0	0	28.0245	0	0	0	2.20963	0
601	152.018	0	0	0	0	0	0	0.862389	0	0	0	0	0	0	0	21.7755	0	0	0	0	0	0	0	0	0	0	0	0	0	0	0	0	0	0	0.00538357	0	18.1123	0	0	11.6503	0	0	0	0	0	0	0	0	0
602	152.272	0	0	0	0	0	0	0	0	0	0	0	0	0	0	0	0	0	0	0	0	0	0	0	0	0	0	0	0	0	0	0	0	0	0.531134	0	0.330959	0	0	14.8213	0	0	0	0	0	0	11.802	0	0
603	152.525	0	9.46406	0	0	0	0	0	0	0	0	0	0	0	0	0	0	0	0	0	0	0	0	0	0	0	15.8033	0.366825	5.29589	0	0	0.100587	0	0	0.00276677	0	0	1.35988	0	0	0	2.06714	0	0	0	0	0	21.2509	0
604	152.778	0	0	0.823792	0	0	1.26494	0	0	0	0	0	0	0	0	6.54425	0	0	0	0	0	0	0	0	0	0	0	0	7.61432	0	0	0	0	0	10.7377	0	2.0948	0	0	0	0	0	0	0	0	0	0	1.54825	0
605	153.032	0	0	0	0	0	0	0	0	0	0	0	0	0	0	0	0	0	0	0	0	0	0	0	0	0	0	0	7.29042	0	0	0	0.147243	13.4144	0	0	2.09324	0	0	78.0587	0	0	0	0	0	1.80144	0	0	0
606	153.285	0	2.4479	0	0	0	0	0	0	0	0	0	0	0	0	0	0	0	0	0	0	0	0	0	0	0	0	0	0	0	0	0	0	0	13.3448	0	0	0	0	110.394	0	0	0	0	0.397429	0	5.0676	0	0
607	153.538	0	8.79635	0	0	0	0	0	1.16953	0	0	0	0	0	0	0	0	0	0	0	0	0	0	0	0	0	0	0	0	0	0	1.63684	0	0	5.31653	0	0	0	0	10.9994	0	0	0	0	0	0	0	17.9352	0
608	153.792	0	0	0	0	0	0	0	0	0	0	0	0	0	0	0	0	0	0	0	0	0	0	0	0	0	0	0	0	0	0	0	0	0	10.7351	0	0	0	0	0	0	0	0	0	0	0	3.72918	3.79388	0
609	154.045	0	0	0	0	0	0	0	0	0	0	0	0	0	0	0	0	0	0	0	0	0	0	0	0	0	0	0	0	0	0	0	0	0	0.773284	0	1.66595	0	0	15.6274	0	0	0	0.209458	0	0	0	0	0
610	154.298	0	0	0	0	0	0	4.07319	0.252408	0	0	0	0	0	0	0	0	0	0	0	0	0	0	0	0	0	0	0	0	0	0	0	0	0	0	0	0	0	0	0	0	0	0	0	0	0	10.6462	1.32328	0
611	154.552	0	0	0	0	0	0	0	0	0	0.0439961	0	0	0	0	26.3843	0	0	0	0	0	0	0	0	0	0	0	0	0	0	4.73813	0	0	0	5.0146	0	3.97616	0	0	5.15901	0	0	0	0	0	0	31.4843	8.27678	0
612	154.805	0	0	0	0	0	0	0	0	0	0	0	0	0	0	0	0	0	0	0	0	0	0	0	0	0	0	0	0	0	0	0	1.03381	0	5.29233	0	0	0	0	0	0	0	0	0	0	1.58028	0	12.185	0
613	155.059	0	0	0	0	1.69777	0	0	0	0	0	0	0	0	0	0	0	0	0	0	0	0	0	0	0	0	0	0.237516	1.95131	0	0	0	0	0	6.81689	0	0	0.00417582	0	0	0	2.46705	0	0	0	19.474	0	0	0
614	155.312	0	0	0.942132	0	0	0	0	0	0	0	0	0	0	0	0	0	0	0	0	0	0	0	0	0	0	0	0	0	0	0	0	0	0	25.439	0	1.43017	0	0	2.88068	0	0	0	0	0	0	0	67.0801	0
615	155.565	0	0	0	0	0	0	0	0	0	0	0	0	0	0	0	0	0	0	0	0	0	0	0	0	0	0	0.0454169	0	0	0	0	0	0	5.9676	0	5.37594	1.23451	0	0.399098	0	0	0	0	0.323894	0	0	0	0
616	155.819	0	10.9891	0	0	0	0	0	0	0	0	0	0	0	0	0	0	0	0	0	0	0	0	0	0	0	0	0	0	0	0	0	0	0	0	0	0	0	0	0	0	0	0	0	0	0	0.777219	0	0
617	156.072	0	0	0	0	0	0	2.25889	0	0	0	0	0	0	0	0.116544	0	0	0	0	0	0	0	0	0	0	0	0	0	0	0	0	0	0	12.1801	0	0.0520872	0.0650488	0	7.45307	0	0	0	0	0	0	0	0	0
618	156.325	0	0	0	0	0	0	0	0	0	0	0	0	0	0	0	0	0	0	0	0	0	0	0	0	0	0	0	0.265737	0	0	0	0	0	4.33928	0	1.48017	0.965581	0	0	0	0	0.967132	0	0	0	2.52569	0	0
619	156.579	0	0	0	0	17.9662	0	0	0	0	0	0	0	0	0	0	0	0	0	0	0	0	0	0	0	0	0	0	0	0	0	0	0	0	19.6341	0	0	0	0	0	0	0	0	0	0	0	0	0.981163	0
620	156.832	0	0	0	0	1.69187	0	0	0	0	0	0	0	0	0	4.6197	0	0	0	0	0	0	0	0	0	0	0	0	0	0	0	0	0.149457	0	4.1308	0	0	1.08168	0	0	0	0	0	0	0	0	0	1.11435	0
621	157.085	0	0	0	0	0	0	1.22481	0	0	0	0	0	0	0	0	0	0	0	0	0	0	0	0	0	0	0	0	0	0	0	0	0	0	0.0971371	0	26.2665	0	0	0	0	0	0	0	0	0	0	0	0
622	157.339	0	0	0	0	0	0	0	0	0	0	0	0	0	0	0	0	0	0	0	0	0	0	0	0	0	0	0	0	0	0	0	0	0	2.51644	0	0	10.5441	0	0	0	0	0	0	0	0	0	16.7787	0
623	157.592	0	0	0	0	1.52095	0	0	0	0	0	0	0	0	0	14.575	0	0	0	0	0	0	0	0	0	0	14.6764	0	0	0	0	0	0	0	288.295	0	0	2.79237	0	0	0	0	0	0	0	0	0	9.00517	0
624	157.846	0	0	0	0	0	0	0	0	0	0	0	0	0	0	1.04943	0	0	0	0	0	0	0	0	0	0	0	0	0	0	0	0	0	0	13.8992	0	0	0	0	25.1996	0	0	1.25808	0	0	0	0	0.0330474	0
625	158.099	0	0	0	0	0	0	0	2.15601	0	0	0	0	0	0	0	0	0	0	0	0	0	0	0	0	0	0	0	0.330935	0	0	17.6619	0	0	0	0	0	0.481131	0	0	0	6.31726	4.3199	4.47063	0	0	1.73775	0.634764	0
626	158.352	0	0	0	0	10.4918	0	0	0	0	0	0	0	0	0	0.000438105	0	0	0	0	0	0	0	0	0	0	0	0	0	0	0	0	0.0382849	0	37.7056	0	0	0	0	0	0	0	0	0	0	1.45885	0	0	0
627	158.606	0	0	0	0	0	0	0	0	0	0	0	0	0	0	0	0	0	0	0	0	0	0	0	0	0	0	0	0	0	0	0	0	0	79.8894	0	0	0	0	0	0	0	0.0452946	0	0	0	0	0	0
628	158.859	0	0	0	0	0	6.17213	0	0	0	0	0	0	0	0	0	0	0	0	0	0	0	0	0	0	0	0	0	0	0	0	0	0	0	35.252	0	0	0	0	5.49233	0	0.64574	0	0	0	0	0.0175282	8.80835	0
629	159.112	0	0	0	0	0.893881	0	0	0	0	0	0	0	0	0	0	0	0	0	0	0	0	0	0	0	0	0	0	0	0	0	0	0	0	13.9991	0	0.202859	0	0	0	0	0	0	0	0	0	0	0	0
630	159.366	0	0	0	0	2.2527	0	0	0	0	0	0	0	0	0	0	0	0	0	0	0	0	0	0	0	0	0	0	0	0	0	0	0	0	5.1016	0	0.0581733	0	0	0	0	0	0	0	7.14379	0.393782	0	4.42143	0
631	159.619	0	0	0	0	1.04712	0	0	0	0	0	0	0	0	0	0	0	0	0	0	0	0	0	0	0	0	0	0	0	0	0	0	0	0	4.30513	0	0	0.119784	0	0	0	0	0	0	0	0	0	0	0
632	159.872	0	0	10.385	0	0	0	0	0	0	0	0	0	0	0	0	0	0	0	0	0	0	0	0	0	0	0	0	0	0.491333	0	0	0	0	10.6395	0	9.42961	0	0	0	0	0	0	0	18.1015	0	0	3.53166	0
633	160.126	0	0	0	0	0	0	0	0	0	0	0	0	0	0	2.93667	0	0	0	0	0	0	0	0	0	0	0	0	0	0	0	0	0	0	0	0	2.10106	0	0	0	0	0	0	0	0	0	0	0	0
634	160.379	0	0	0.153937	0	0	0	0	0	0	0	0	0	0	0	0	0	0	0	0	0	0	0	0	0	0	0	0	0	0	0	0.126076	0	0	14.3395	0	6.26251	0	0	0	0	0	0	0	0	0	0	2.95032	0
635	160.633	0	0	0	0	0	0	0	0	0	0	0	0	0	0	0	0	0	0	0	0	0	0	0	0	0	0	0	6.31882	0	0	0	0.0627951	0	0	0	0	1.25893	0	0	0	0	0	0	0	0	0	4.73405	0
636	160.886	0	0	0	0	0	0	0	0	0	0.0141536	0	0	0	0	0	0	0	0	0	0	0	0	0	0	0	0	0	0	0	0	0	0	0	10.7519	0	0	0	0	0	0	0	0	14.7811	0	0	0	5.16706	0
637	161.139	0	0	0	0	0	0	0	0	0	0	0	0	0	0	0	0	0	0	0	0	0	0	0	0	0	0	0	10.1872	0	0	0	0	0	0.00580983	0	41.7518	0	0	0	0	0	0.12902	0	0	0	1.91905	1.60017	0
638	161.393	0	0	0	0	0	0	0	0	0	0	0	0	0	0	0	0	0	0	0	0	0	0	0	0	0	0	0	9.20725	0	0	0	0	0	1.52899	0	4.48458	0.429821	0	0	0	0	0	0	0	0	0	0	0
639	161.646	0	0	0	0	0	0	0	0.0817363	0	0	0	0	0	0	0	0	0	0	0	0	0	0	0	0	0	0	0	0	0	0	0	0	0	0	0	6.96411	0	0	0	0	0	7.58529	0	0	0	0	0	0
640	161.899	0	0	1.36168	0	0	0	0	0	0	0	0	0	0	0	0	0	0	0	0	0	0	0	0	0	0	0	0	0	0	0	0	0	0	20.7984	0	0.610628	0	0	0	0	0	0	0	0	0	0	0	0
641	162.153	0	0.955386	0	0	0	0	0	0	0	0	0	0	0	0	0	0	0	0	0	0	0	0	0	0	0	0	0	0	0	0	0	0	0	27.0695	0	0	0	0	0	0	0	0	10.7781	18.9357	0	0	0	0
642	162.406	0	0	0	0	0	0	0	0	0	0	0	0	0	0	2.13448	0	0	0	0	0	0	0	0	0	0	0	0	0.18252	0	0	0	0	0	47.4065	0	0	0	0	0	0	0	5.95426	0	0	0	0	0	0
643	162.659	0	0	0	0	0	0	0	0	0	0	0	0	0	0	0	0	0	0	0	0	0	0	0	0	0	0	0	0.40966	0	0	0	0	0	14.7269	0	0	0	0	0	0	0.633362	0	11.9331	0	0	0	14.3055	0
644	162.913	0	0	0	0	0	0	0	0	0	0	0	0	0	0	0	0	0	0	0	0	0	0	0	0	0	0	0	0	0	0	0	0	0	0	0	0	0	0	0	0	0	0	0	0	0	0	0	0
645	163.166	0	0	0	0	0	0	0	0	0	0	0.15531	0	0	0	0	0	0	0	0	0	0	0	0	0	0	0	0	0	0	0	0	0	0	0	0	3.49914	0.0471259	0	0	0	0	0	0	0.511715	0	0.668778	0	0
646	163.42	0	0	0	0	0	0	0	0	0	0	0	0	0	0	0	0	0	0	0	0	0	0	0	0	0	0	0	0	0	0	0	0	0	0	0	0.519581	0	0	0	0	0	0	4.12179	0	0	0	0	0
647	163.673	0	0	0	0	0	0	0	0.104719	0	0	0	0	0	0	0	0	0	0	0	0	0	0	0	0	0	0	0.507966	0	0	0	0	0	0	0.325674	0	0.547766	0	0	0	0	0	0	0	190.346	0	0	71.4244	0
648	163.926	0	0	0	0	0	0	0	0	0	0	0	0	0	0	0.0857503	0	0	0	0	0	0	0	0	0	0	0	0	6.4101	0	0	0	0	0	0	0	0	0.00377338	0	0	0	0	0	0	0	0	0	0.768311	0.703005
649	164.18	0	0	0	0	0	0	0	0	0	0	0	0	0	0	0	0	0	0	0	0	0	0	0	0	0	0	0	0	0	0	0	0	0	5.9478	0	0	0	0	2.39433	0	0	0	0	0	0	0	0	0
650	164.433	0	0	0	0	0	0	0	0	0	0	0	0	0	0	0	0	0	0	0	0	0	0	0	0	0	0	0	0	0	0	0	0.237595	0	5.27832	0	0	0	0	0	0	0	0	0	0	0	0	5.61836	0
651	164.686	0	0	0	0	0	0	0	0	0	0	0	0	0	0	35.2264	0	0	0	0	0	0	0	0	0	0	0	0	0	0	0	8.69023	0	0	0.232441	0	5.06122	0	0	0	0	0	0	0	12.5877	0	0.813822	8.57726	0
652	164.94	0	0	0	0	0	0	0	0	0	0	0	0	0	0	0	0	0	0	0	0	0	0	0	0	0	0	0	0	0	0	0	0	0	0	0	10.9778	0	0	5.96508	0	0	0.113931	5.37316	0	0	0	0	0
653	165.193	0	0	0	0	0	0	0	0	0	0	0	0	0	0	0	0	0	0	0	0	0	0	0	0	0	0	0.237516	0	0	0	0	0	0	0	0	34.6682	0	0	0	0	0	0	11.8887	0	0	0	49.0952	0
654	165.446	0	0	0	0	0	0	0	0	0	0	0	0	0	0	0	0	0	0	0	0	0	0	0	0	0	0	0	4.09065	0	0	0	0	0	0	0	0	5.08153	0	0	0	0	0	0	0.497913	0	0	0	0
655	165.7	0	0	0	0	0	0	0	0	0	0	0	0	0	0	0	0	0	0	0	0	0	0	0	0	0	0	0	5.97589	0	0	0	0	0	0	0	7.33231	0.217987	0	0	0	0.284149	0	4.0985	0	0	0	0	0
656	165.953	0	0	0	0	0	0	0	0	0	0	0	0	0	0	0.0861331	0	0	2.12783	0	0	0	0	0	0	0	0	0	5.53828	0	0	6.44727	5.88778	0	4.42336	0	4.50691	0.387214	0	2.17086	0	0	0	0	10.3992	0	0	0	0
657	166.207	0	0	0	0	0	0	0	0	0	0	0	0	0	0	0	0	0	0	0	0	0	0	0	0	0	0	0	0	0	0	0	0	0	0	0	2.24359	0.462032	0	0	0	0	0.120968	18.2464	0	0	0	0	0
658	166.46	0	0	0	0	0	0	0	0	0	0	0	0	0	0	0	0	0	0	0	0	0	0	0	0	0	0	0.298701	0.484856	0	0	0	0	0	11.9109	0	0	0	0	0	0	0	0	0	0	0	0	3.06815	0
659	166.713	0	0	0	0	0	7.32754	0	0	0	0	0	0	0	0	0.983602	0	0	3.1592	0	0	0	0	0	0	0	0	0	0.507085	0	0	0	0	0	0	0	0	0	0	22.1112	0	0	0.321964	0	0	0	0	0	0
660	166.967	0	0	0	0	0	0	0	0	0	0	0	0	0	0	0	0	0	0	0	0	0	0	0	0	0	0	0	0	0	0	0	0	0	61.6964	0	0	0	0	0	0	0	0	0	0	49.1328	0	0	0
661	167.22	0	0	0	0	0	0	0	0	0	0	0	0	0	0	0	0	0	0	0	0	0	0	0	0	0	0	0	0	0	0	20.7592	0	0	4.73002	0	12.5384	0	0	14.8846	0	0	0	0.135994	0	0	0	0.385047	0
662	167.473	0	0	0	0	0	0	0	0	0	0	0	0	0	0	0	0	0	0	0	0	0	0	0	0	0	0	0.595752	0	0	0	0	0	0	0.806233	0	0.523808	0	0	0	0	0	0	0	0	0	0	80.8715	0
663	167.727	0	0	0	0	0	0	0	0	0	0	0	0	0	0	0	0	0	0	0	0	0	0	0	0	0	0	0	1.4273	0	0	0	0	0	1.99831	0	0	0	0	0	0	0	0	0	0	0	0	0	0
664	167.98	0	0	0	0	0	0	0	0	0	0	0	0	0	0	0	0	0	0	0	0	0	0	0	0	0	0	0	0.121868	0	0	0	0	0	0	0	82.1157	0	0	4.84377	0	0	0	0	6.39049	0	0	0	0
665	168.233	0	0	0	0	0	0	0	0	0	0	0	0	0	0	0	0	0	0	0	0	0	0	0	0	0	0	0	0	0	0	18.8739	0	0	19.3424	0	0	0	0	0	0	0	0	0	0	0	0	0	0
666	168.487	0	0	0	0	12.6754	0	0	0	0	0	0	0	0	0	0.565717	0	0	0	0	0	18.1305	0	0	0	0	0	0	0	0	0	0	0	0	1.28468	0	0	0	0	0	0	0	0	0	0	0	17.4304	0.0277309	0
667	168.74	0	0	0	0	0	0	0	0	0	0	0	0	0	0	0	0	0	0	0	0	0	0	0	0	0	0	0	0	0	0	0	0	0	0.156747	0	75.5412	1.5338	0	0	0	0	0	0	0	0	0	0	0
668	168.994	0	0	0	0	0	0.104912	0	0	0	0	0	0	0	0	0	0	0	0	0	0	0	0	0	0	0	0	0	0	0	0	0	0	0	1.19439	0	0	0.00378507	0	18.1821	0	0	0	0	0	0	0	37.422	0
669	169.247	0	0	0	0	0	0	0	0	0	0	0	0	0	0	0	0	0	0	0	0	0	0	0	0	0	0	0	0	0	0	0	0.0713441	0	0.339204	0	45.1998	0	0	0.272419	0	4.82014	0	0	0	0	0	0	0
670	169.5	0	0	0	0	0	0	0	0	0	0.0387033	0	0	0	0	0	0	0	0	0	0	0	0	0	0	0	0	0.188291	0	0	0	0	0	0	0.516147	0	0	0	0	0	0	0	0	5.60144	0	0	0	0	0
671	169.754	0	0	0	0	0	0	0	0	0	12.4417	0	0	0	0	0	0	0	0	0	0	0	0	0	0	0	0	0	0	0	0	0	0	0	10.8875	0	0	0	0	0	0	0	0	0	0	0	0	0	0
672	170.007	0	0	0	0	0	0	0	0	0	0	0	0	0	0	3.21685	0	0	0	0	0	0	0	0	0	0	0	0	0	0	0	0	0	0	83.6246	0	0	0	0	0	0	0	0	0	0	0	0	0	0
673	170.26	0	0	0	0	0	0	0	0	0	0	0	0	0	0	0.543042	0	0	0	0	0	0	0	0	0	0	0	0	0.453715	0	0	0	0	0	0	0	0	0	0	26.9297	0	0	0	0	0	0	0	0	0
674	170.514	0	0	0	0	0.997783	0	0	0	0	0	0	0	0	0	0	0	0	0	0	0	0	0	0	0	0	0	0	1.54916	0	0	0	0	0	0	0	0	0	0	0	0	0	0	0	0	0	0	1.27437	0
675	170.767	0	0	0	0	0	0	0	0	0	0	0	0	0	0	0	0	0	0	0	0	0.12145	0	0	0	0	0	0.115143	0	0	0	0	0.0581654	0	9.4047	0	1.23848	0	155.382	0	0	0	0	0	1.20595	0	0	5.73679	0
676	171.02	0	0	0	0	0	0	0	0	0	0	0	0	0	0	0	0	0	0	0	0	0	0	0	0	0	0	0	0	0	0	0	0	0	5.80354	0	0	0	0	0	0	0	0	0	0.620476	0	0	55.3304	0
677	171.274	0	0	0	0	0	0	0	0	0	0	0	0	0	0	0	0	0	0	0	0	0	0	0	0	0	0	0	0	0	0	0	0	0	0	0	0	0.00121564	0	0	0	0.729651	0	0	0	0	0	0	0
678	171.527	0	0	0	0	0	0	0	0	0	0	0	0	0	0	0	0	0	0	0	0	0	0	0	0	0	0	0	0	0	0	0	0.491807	0	0	0	0	6.3067	0	0	0	0	0	6.0909	0	0	0	0	0
679	171.781	0	0	0	0	0	0	4.63571	0	0	0	0	0	0	0	0	0	0	0	0	0	0	0	0	0	0	0	0	0	0	0	0	0	0	20.6978	0	0	0	0	0	0	0	0	0	0	0	0	0	0
680	172.034	0	0	0	0	2.7844	0	0	0	0	0	0	0	0	0	0	0	0	0	0	0	0	0	0	0	0	0	0	0	0	0	0	0	0	0	0	0	0	0	0	0	0	0	0	55.7196	0	0	0	0
681	172.287	0	0	0	0	0	0	0	0	0	0	0	0	0	0	0	0	0	0	0	0	0	0	0	0	0	0	0	0	0	0	0	0	0	0.250458	0	0	0	0	0	0	0	0	0	0	0	0	0	0
682	172.541	0	0	0	0	0	0	0	0	0	0	0	0	0	0	0	0	0	0	0	0	0	0	0	0	0	0	0	0.766085	0	0	0	0	0	0	0	0	0	0	0	0	0	0.162281	0	0	0	0	0	0
683	172.794	0	0	0	0	0	0	0	0	0	0	0	0	0	0	0	0	0	0	0	0	0	0	0	0	0	0	0.701131	6.43601	0	0	0	0	0	1.59088	0	121.751	0	0	0	0	0	0	0	0	0	0	8.40609	0
684	173.047	0	0	0	0	0	0	0	0	0	0	0	0	0	0	0	0	0	0	0	0	0	0	0	0	0	0	0	0	0	0	0	0	0	0	0	1.17449	0	0	24.1642	0	0	0	0	0	0	0	0	0
685	173.301	0	0	0	0	0	0	0	0	0	0	0	0	0	0	0	0	0	0	0	0	0	0	0	0	0	0	5.41706	0	0	0	0	0	0	0.438536	0	0	0.0886828	0	0	0	0	0	2.35134	0	0	0	3.3217	0
686	173.554	0	0	0	0	0	0	0	0	0	0	0	0	0	0	0	0	0	0	0	0	0	0	0	0	0	0	0	0	0	0.586501	0	0	0	0.815326	0	0	0	0	0	0	1.25018	0	0	41.6447	0.0230222	0	0	0.814075
687	173.807	0	0	0	0	0	0	0	0	0	0	0	0	0	0	0	0	0	0	0	0	0	0	0	0	0	0	0	0	0	0	0	0	0	0.246547	0	0	0	0	0	0	0.480353	0	0	0	0	0	0	0
688	174.061	0	0	0	0	0	0	0	0	0	0	0	0	0	0	0	0	0	0	0	0	0	0	0	0	0	0	0	0	0	0	0	0	0	2.26167	0	0.748651	0	128.649	0	0	0	0	0	0	0	0	0	0
689	174.314	0	0	0	0	0	0	0	0	0	0	0	0	0	0	0	0	0	0	0	0	0	0	0	0	0	0	14.7665	0	0	0	0	0	0	147.796	0	37.1418	0	0	0	0	0	0	0	0	0	1.27403	0	0
690	174.568	0	0	0	1.12037	2.6431	0	0	0	0	0	0	0	0	0	0	0	0	0	0	0	0	0	0	0	0	0	0	2.56652	0	0	5.19796	0	0	0	0	0	6.26306	0	0	0	0	0	0	0	0	0	60.719	5.32018
691	174.821	0	0	0	0	0	0	0	0	0	0	0	0	0	0	0	0	0	0	0	0	0	0	0	0	0	0	0	0	0	0	0	0	0	0.27442	0	81.9575	0	0.485342	13.7166	0	0	0	0	0	0	0	0	0
692	175.074	0	0	0	0	0	0	0	0	0	0	0	0	0	0	0	0	0	0	0	0	0	0	0	0	0	0	0	0	0	0	0	0	0	0	0	0.1026	0.656531	0	20.7895	0	0	0	0	0	51.7342	0	1.32025	0
693	175.328	0	0	0	0	0	0	0	0	0	0	0	0	0	0	0	0	0	0	0	0	0	0	0	0	0	0	0	0	0	0	11.7105	0	0	0	0	0	0	0	0	0	0	0	0	0	0	0	0	0
694	175.581	0	0	0	0	0	0	0	0	0	0	0	0	0	0	0	0	0	0	0	0	0	0	0	0	0	0	0.577005	0	0	0	0	0	0	15.6545	0	7.39487	0.385931	0	0	0	0	0	0	119.291	0	0	5.46672	0
695	175.834	0	0	0	0	0	0	0	0	0	0	0	0	0	0	0.137449	0	0	0	0	0	0	0	0	0	0	0	0	0	0	0	0	0	0	1.02045	0	4.18758	0.478857	0	28.438	0	0	0	0	0	0	0	0	0
696	176.088	0	0	0	0	0	0	0	0	0	0	0	0	0	0	0	0	0	0	0	0	0	0	0	0	0	0	0	0	0	0	0	0	0	0	0	2.27096	0	0	0	0	8.70606	0	0	0	0	0	0	0
697	176.341	0	0	0	0	2.56646	0	0	0	0	0	0	0	0	0	0	0	0	0	0	0	0	0	0	0	0	0	0	0	0	0	0	0	0	0.00556512	0	0	0	0	0	0	0	0	0	0	0	0	0	0
698	176.594	0	0	0	0	0	0	0	0	0	0	0	0	0	0	0	0	0	0	0	0	0	0	0	0	0	0	0	0	0	0	0	0	0	0.518259	0	1407.01	0	0	0	0	0	0	0	0.571219	0	0	0	0
699	176.848	0	0	0	0	0	0	0	0	0	0	0	0	0	0	0.0675511	0	0	0	0	0	0	0	0	0	0	0	0	0	0	0	0	0.0761514	0	2.18748	0	0.389278	0	0	13.9603	0	0	0	0	0	0	0	0.0228881	0
700	177.101	0	0	0	0	0	0	0	0	0	0	0	0	0	0	0	0	0	0	0	0	0	0	0	0	0	0	0	0	0.165055	0	0	0	0	0	0	6.72953	0	0	0	0	26.895	0	0	0	0	0	0	0
701	177.355	0	0	0	0	0	0	0	0	0	0	0	0	0	0	0	0	0	0	0	0	0	0	0	0	0	0	0	0	0.170916	0	0	0	0	0	0	3.49434	0	67.378	0	0	0	0	0	0	0	0	0	0
702	177.608	0	0	0	0	0	0	3.97449	0	0	0	0	0	0	0	0	0	0	0	0	0	0	0	0	0	0	0	0	0	0	0	0	0	0	12.2985	0	0	0.264785	0	0	0	0	0	0	116.934	0	0	0	0
703	177.861	0	0	0	0	0	0	3.70093	0	0	0	0	0	0	0	0	0	0	0	0	0	0	0	0	0	0	0	0	0	0	0	0	0	0	133.976	0	4.66082	0	0	66.1325	0	0	8.09361	0	0	0.183866	0	25.8683	0
704	178.115	0	0	0	0	0.894288	0	3.43895	0	0	0	0	0	0	0	0	0	0	0	0	0	0	0	0	0	0	0	0	0	0	0	0	0.0805206	0	0	0	0	0	0	14.5447	0	0	0	0	0	0.198016	0	0	0
705	178.368	0	0	0	0	0	0	0	0	0	0	0	0	0	0	0	0	0	0	0	0	0	0	0	0	0	0	0	0	0	0	0	0	0	0	0	0.823666	0	0	0	0	0	0	23.5535	0.912333	0	0	0	0
706	178.621	0	0	0	0	2.28473	0	0	0	0	0	0	0	0	0	0	0	0	0	0	0	0	0	0	0	0	0	0	0	0	0	0	0	0	0	0	0	0	0	0	0	0	0	0	0	0	0	0	0
707	178.875	0	0	0	0	0	0	0	0	0	0	0	0	0	0	0	0	0	0	0	0	0	0	0	0	0	0	16.6553	0	0	0	0	0.0114342	0	254.3	0	2.95827	0	0	0	0	0	0	0	0	0	0	15.9796	0
708	179.128	0	0	0	0	0	0	0	0	0	0	0	0	0	0	0.466184	0	0	0	0	0	0	0	0	0	0	0	0	0	0	0	0	0	0	0	0	0	0	0	0	0	0	0	0	0	0	0	0	0
709	179.381	0	0	0	0	0	0	0	0	0	0	0	0	0	0	0	0	0	0	0	0	0	0	0	0	0	0	0	0	0	0	0	0.134593	0	0.240575	0	0	0	0	0	0	0	0	0	0	73.3913	0	0	0
710	179.635	0	0	0	0	0	0	0	0	0	0	0	0	0	0	0	0	0	0	0	0	0.0186372	0	0	0	0	0	0	0	0	0	0	0	0	0	0	0	0	0	0	0	0	0	0	0	0	0	0	0
711	179.888	0	0	0	0	0	0	3.9549	0	0	0	0	0	0	0	0	0	0	0	0	0	0	0	0	0	0	0	0	0	0	0	0	0	0	3.73035	0	0	0	0	0	0	0	0	0	74.6321	0	0	2.50039	0
712	180.142	0	0	0	0	2.79654	0	4.16278	0	0	0	0	0	0	0	0	0	0	0	0	0	0	0	0	0	0	0	0	0	0	0	0	0	0	0	0	0	0.300031	0	1.40055	0	0	0	0	89.1101	0	0	0	0
713	180.395	0	0	0	0	2.19438	0	0.655801	0	0	0	0	0	0	0	0	0	0	0	0	0	0	0	0	0	0	0	0	0.484296	0	0	13.1224	0	0	0.312799	0	0	0	0	0	0	0	0	0	0	0	0	0	0
714	180.648	0	0	0	0	0	0	0	0	0	0	0	0	0	0	0	0	0	0	0	0	0	0	0	0	0	0	0	0	0	0	0	0	0	1.36038	0	1.28315	1.10469	0	0	0	0	0	0	167.128	0	12.5625	0	0
715	180.902	0	0	0	0	0	0	0	0	0	0	0	0	0	0	0	0	0	0	0	0	0	0	0	0	0	0	0	0	0	0	0	0	0	8.29962	0	0	0	0	0	0	0	0	0	0	0	0	0	0
716	181.155	0	0	0	0	0	0	0	0	0	0	0	0	0	0	0	0	0	0	0	0	0	0	0	0	0	0	0	0	0	0	0	0	0	0	0	0.680638	0	0	0	0	0	0	0	212.466	0	0	0	0
717	181.408	0	0	0	0	0	0	0	0	0	0	0	0	0	0	0	0	0	0	0	0	0	0	0	0	0	0	0	0.0861252	0	0	0	0	0	0	0	10.1229	0	0	0	0	0	0	0	0	2.06168	13.187	5.08923	0
718	181.662	0	0	0	0	2.02348	0	0	0	0	0	0	0	0	0	0	0	0	0	0	0	0	0	0	0	0	0	0	0	0	0	0	0	0	0	0	0	0	0	0	0	0	0	0	0	0	0	0	0
719	181.915	0	0	0	0	0	0	0	0	0	0	0	0	0	0	0	0	0	0	0	0	0	0	0	0	0	0	0	0	0	0	0	0	0	56.0078	0	1.08631	0	43.5147	0	0	0	4.8328	0	0	0	0	8.83347	0
720	182.168	0	0	0	0	0	0	4.14227	0	0	0	0	0	0	0	0	0	0	0	0	0	0	0	0	0	0	0	0	0	0	0	0	0	0	0.209568	0	0	0.268752	0	0	0	0	0	0	0	0	14.3284	0	0
721	182.422	0	0	0	0	0	0	0	0	0	0	0	0	0	0	0	0	0	0	0	0	0	0	0	0	0	0	0	0	0	0	0	0	0	0	0	0	1.01281	0	0	0	0	7.99902	0	0	0	0	0	0
722	182.675	0	0	0	0	0	0	0	0	0	0	0	0	0	0	0	0	0	0	0	0	0	0	0	0	0	0	0	0	0	0	0	0	0	0	0	1.66024	0	0	0	0	0	0	0	0	0	0	0	0
723	182.929	0	0	0	0	0	0	0	0	0	0	0	0	0	0	0	0	0	0	0	0	0	0	0	0	0	0	0	0	0	0	0	0	0	0.715529	0	0	0	0	0	0	0	0	0	0	0	0	0	0
724	183.182	0	0	0	0	0	0	2.38986	0	0	0	0	0	0	0	0	0	0	0	0	0	0	0	0	0	0.186972	0	0	0	0	0	0	0	0	0	0	66.4694	3.17486	0	7.96078	0	0	0.173221	0	0	0	0	0	0
725	183.435	0	0	0	0	0	0.228517	0	0	0	0	0	0	0	0	0	0	0	0	0	0	0	0	0	0	0	0	0	0	0	0	0	0	0	0	0	2.2422	0	0	0	0	0	10.2692	0	0	0	0.62207	1.57399	0
726	183.689	0	0	0	0	0	0	0	0	0	0	0	0	0	0	0	0	0	0	0	0	18.4861	0	0	0	0	0	0.0155705	4.85618	0	0	0	0	0	17.5201	0	2.39329	0	0	0	0	0	11.5707	0	799.304	17.204	0	0	0
727	183.942	0	0	0	0	0	0	0	0	0	0	0	0	0	0	0	0	0	0	0	0	0	0	0	0	0.215887	0	0	0	0	0	0	0	0	0.0349656	0	0	0	0	0	0	0	0	0	0	0	0	0	0
728	184.195	0	0	0	0	0	0	0	0	0	0	0	0	0	0	0.0657119	0	0	0	0	0	0	0	0	0	0	0	0	0	0	0	0	0	0	1.55705	0	5.1647	0	118.681	0	0	0	4.8093	0	242.119	0	0	10.5413	0
729	184.449	0	0	0	0	1.94214	0	0	0	0	0	0	0	0	0	0	0	0	0	0	0	0	0	0	0	0	0	0	0	0	0	0	0	0	0.195067	0	1.97913	0	0	0	0	0	1.52714	0	174.534	2.63599	0	0	0
730	184.702	0	0	0	0	0	0	0	0	0	0	0	0	0	0	0	0	0	0	0	0	0	0	0	0	0	0	7.67659	0	0	0	0	0	0	0	0	1.03583	0	0	4.58153	0	0	0	0	120.85	0	0	0	0
731	184.955	0	0	0	0	0	0	0	0	0	0	0	0	0	0	0	0	0	0	0	0	0	0	0	0	0	0	0	0	0	0	0	0	0	1.89189	0	0	0	0	0	0	0	0	0	159.831	3.83045	0	0	0
732	185.209	0	0	0	0	0	0	3.30439	0	0	0	0	0	0	0	0	0	0	0	0	0	0	0	0	0	0	0	0	0	0	0	0	0	0	3.64995	0	0	0	0	0	0	0	0	0	0	0	0	0	0
733	185.462	0	0.540626	0	0	0	0	0	0	0	0	0	0	0	0	0	0	0	0	0	0	0	0	0	0	0	0	0	0	0	0	0	0	0	4.28708	0	119.242	0	0	0	0	1.74937	0	0	34.2625	0	0	0	0
734	185.716	0	0	0	0	0	0	0	0	0	0.0108461	0	0	0	0	0	0	0	0	0	0	0	0	0	0	0	0	0	0	0	0	0	0	0	0	0	18.5826	0	0	0	0	0	0.428601	0	252.089	0	0	0	0
735	185.969	0	0	1.72698	0	0	0	0	0	0	0	0	0	0	0	0	0	0	0	0	0	0	0	0	0	0	0	0	0	0	0	0	0	0	1.61462	0	0	0	0	5.46082	0	0	0	0	0	0	0	0.35642	0
736	186.222	0	0	0	0	2.11375	0	0	0	0	0	0	0	0	0	0	0	0	0	0	0	0	0	0	0	0.291703	0	0	0	0	0	0	0	0	0	0	0	16.6201	0	0	0	0	0	0	0.0908062	0	0	0	0
737	186.476	0	0	0	0	0	0	0	0	0	0	0	0	0	0	0	0	0	0	0	0	0	0	0	0	0	0	0	0	0	0	0	0	0	0.682671	0	0	0	0	0	0	0	0	0	0	0	0	0	0
738	186.729	0	0	0	0	0	0	0	0	0	0	0	0	0	0	0	0	0	0	0	0	0	0	0	0	0	0	0	0	0	0	0	0	0	0	0	0	0	0	0	0	0	0	0	0	0	0	0	0
739	186.982	0	0	0	0	0	0	0	0	0	0	0	0	0	0	0	0	0	0	0	0	0	0	0	0	0	0	0.53484	0	0	0	0	0	0	0	0	0	0	0	0	0	0	0	0	0	0	0	1.73954	0
740	187.236	0	0	0	0	0	0	0	0	0	0	0	0	0	0	0	0	0	0	0	0	0	0	0	0	0	0	0	0	0	0	0	0	0	0	0	0	0	0	0	0	0	0	0	60.7916	0	0	0	0
741	187.489	0	0	0	0	0	0	0	0	0	0	0	0	0	0	0	0	0	0	0	0	0	0	0	0	0	0	0	0	0	0	0	0	0	130.302	0	0	0.00135773	0	0	0	3.89737	0	0	67.5306	0	0	0	0
742	187.742	0	0	0	0	1.14822	0	0	0	0	0	0	0	0	0	0	0	0	0	0	0	0	0	0	0	0	0	0	0	0	0	0	0	0	0.720877	0	0	0	0	0	0	24.892	0	0	0	0	0	0	0
743	187.996	0	0	0	0	1.85025	0	0	0	0	0	0	0	0	0	0	0	0	0	0	0	0	0	0	0	0	0	0	0	0	0	0	0	0	0	0	0	6.87777	0	0	0	0	0	0	0	0	0	2.20991	2.06253
744	188.249	0	0	0	0	0	0	0	0	0	0	0	0	0	0	0	0	0	0	0	0	0	0	0	0	0	0	0	0	0	0	0	0	0	0.220979	0	4.41563	0	0	0	0	0	5.2164	0	343.648	0	0	0	0
745	188.503	0	0	0	0	0	0	0	0	0	0	0	0	0	0	0	0	0	0	0	0	0	0	0	0	0	0	0	0	0	0	0	0	0	0	0	0	0	0	0	0	0	0	0	0	0	0	0	0
746	188.756	0	0	0	0	0	0	0	0	0	0	0	0	0	0	0	0	0	0	0	0	0	0	0	0	0	0	0	0	0	0	0	0	0	0.246799	0	5.83723	0	0	1.0074	0	0	4.6451	0	274.282	0	0	2.25986	0
747	189.009	0	0	0	0	0	0	0	0	0	0	0	0	0	0	0	0	0	0	0	0	0	0	0	0	0	0	0	0	0	0	0	0	0	0	0	0	1.2593	0	0	0	0	0	0	511.638	0	0	5.32464	0
748	189.263	0	8.62613	0	0	0	0	0	0	0	0	0	0	0	0	0	0	0	9.89177	0	0	0	0	0	0	0	0	0	0	0	0	0	0	0	2.54012	0	0.0269612	0.297454	0	0	0	0	0	0	0	0	0.964839	0	0
749	189.516	0	0	0	0	0	0	0	0	0	0	0	0	0	0	0	0	0	0	0	0	0	0	0	0	0.00149982	0	0	0	0	0	0	0	0	3.70091	0	0	0	0	0	0	0	0	0	0	0	0	0	0
750	189.769	0	0	0	0	0	0	0	0	0	0	0	0	0	0	0	0	0	0	0	0	0	0	0	0	0	0	0	0	0	0	0	0	0	0	0	0	0	0	0.717254	0	0	0	0	0	0	0	44.4418	2.52299
751	190.023	0	0	0	0	0	0	0	0	0	0	0	0	0	0	0	0	0	0	0	0	0	0	0	0	0	0	0	0	0	0	0	0	0	3.70377	0	2.24243	0.00110908	0	0	0	0	0	0	0	0	0	0	0
752	190.276	0	0	0	0	0	0	0	0	0	0	0	0	0	0	0	0	0	0	0	0	0	0	0	0	0	0	0	0	0	0	6.98063	0	0	6.86322	0	10.0581	0	0	0	0	0	0	0	0	1.85962	9.3731	9.96695	0
753	190.529	0	0	0	0	3.1921	0	0	0	0	0	0	0	0	0	0	0	0	0	0	0	0	0	0	0	0	0	0	0	0	0	0	0	0	14.0354	0	0	0	0	0	0	0	3.60434	0	0	0	0	0	0
754	190.783	0	0	0	0	0	0	0	0	0	0	0	0	0	0	0	0.00288913	0	0	0	0	0	0	0	0	0	0	0	0	0	0	0	0	0	6.8995	0	0	0	0	10.1069	0	27.9493	0	0	0	0.171244	0	0	0
755	191.036	0	0	0	0	0	0	0	0	0	0	0	0	0	0	0	0	0	0	0	0	0	0	0	0	0	0	0	0	0	0	0	0	0	12.8355	0	0	0	0	0	0	0	0	0	49.4739	0	0	0	0
756	191.29	0	0	0	0	0	0	0	0	0	0	0	0	0	0	0.251757	0	0	0.0847241	0	0	0	0	0	0	0	0	0	0	0	0	0	0	0	19.8526	0	0	0.310881	0	66.8641	0	23.0631	0	0	79.7674	0	0	0	0
757	191.543	0	0	0	0	0	0	0	0	0	0	0	0	0	0	0	0	0	0	0	0	0	0	0	0	0	0	0	0	0	0	0	0	0	4.03629	0	0	0	0	0	0	0	0	0	0	0	0	0	0
758	191.796	0	0	0	0	0	0	0	0	0	0	0	0	0	0	0	0	0	0	0	0	0	0	0	0	0	0	0	0	0	0	0	0	0	5.29589	0	0.94544	0	0	0	0	0	1.90719	0	285.868	4.15626	0	0	0
759	192.05	0	0	0	0	0	0	0	0	0	0	0	0	0	0	1.06513	0	0	0	0	0	0	0	0	0	0	0	0	0.21363	0	0	0	0	0	7.03647	0	0	0.467403	0	0	0	0	0.221701	0	0	0	0	0	0
760	192.303	0	0	0	0	0	0	0	0	0	0	0	0	0	0	0	0	0	0	0	0	0	0	0	0	0	0	0	0	0	0	0	40.027	0	40.9636	0	0	0	0	0	0	0	13.8338	0	0	0	0	0	0
761	192.556	0	0	0	0	0	0	0	0.659668	0	0	0	0	0	0	0.05693	0	0	0	0	0	0	0	0	0	0	0	0	0	0	0	0	5.66819	0	5.26259	0	0	0	0	0	0	0	0	0	0	0	0	8.61527	0
762	192.81	0	1.87372	0	0	1.76113	0	0	0	0	0	0	0	0	0	1.35582	0	0	0	0	0	0	0	0	0	0	0	0	0	0	0	0	0	0	0	0	0	0	0	66.888	0	0	0	0	0	0	0	0	0
763	193.063	0	0	0	0	0	0	0	0	0	0	0	0	0	0	0	0	0	0	0	0	0	0	0	0	0	0	0	0	0	0	0	0	0	0.713575	0	0	0	0	0	0	0	0	0	297.651	1.27375	0	0.75859	0
764	193.316	0	0	0	0	0	0	0	0	0	0	0	0	0	0	0	0	0	0	0	0	0	0	0	0	0	0	0	0	0	0	0	0	0	0.243231	0	0	8.57367	0	0	0	0	0	0	0	0	0	11.9861	0
765	193.57	0	0	0	0	0	0	0	0	0	0	0	0	0	0	0	0	0	0	0	0	0	0	0	0	0	0	0	0	0	0	0	0	0	3.7518	0	0	0	0	188.417	0	0.0754291	0	0	251.734	0	0.566068	1.36955	0
766	193.823	0	0	0	0	0	0	0	0	0	0	0	0	0	0	5.77521	0	0	0	0	0	0	0	0	0	0	0	0	0	0	0	0	0	0	0	0	0	0	0	0	0	0	0	0	0	0	0	0	0
767	194.077	0	0	0	0	0	0	0	0	0	0	0	0	0	0	0	0	0	0	0	0	0	0	0.00847399	0	0	0	0	0.858584	0	0	0	0	0	0	0	0	0	0	0	0	0	0	0	0	0	0.374963	2.56201	0
768	194.33	0	0	0	0	0	0	0	0	0	0	0	0	0	0	0	0	0	0	0	0	0	0	0	0	0	0	0	0	0	0	0	0	0	0	0	0	0	0	2.38205	0	0	0	0	0	0	0	0.36596	0
769	194.583	0	0	0	0	0	0	0	0	0	0	0	0	0	0	0	0	0	0	0	0	0	0	0	0	0	0	0	0	0	0	0	0	0	0.169831	0	0	0	0	0	0	0	0	0	0	0	0	0	0
770	194.837	0	0	0	0	0	0	0	0	0	0	0	0	0	0	0	0	0	0	0	0	0	0	0	0	0	0	0	0	0	0	0	0.07447	0	0.332269	0	0	0	0	0	0	6.04858	0	0	0	0	0	0	0
771	195.09	0	0	0	0	0	0	0	0	0	0	0	0	0	0	0	0	0	0	0	0	0	0	0	0	0	0	0	0	0	0	0	0	0	0	0	0	0	0	0	0	0	1.12956	0	0	0	0	0	0
772	195.343	0	0	0	0	0	0	0	0	0	0	0	0	0	0	0	0	0	0	0	0	0	0	0	0	0	0	0	0	0	0	0	0	0	1.78921	0	3.88141	0	0	0	0	0	0	0	0	0	0	0	0
773	195.597	0	0	0	0	0	0	0	0	0	0	0	0	0	0	2.13967	0	0	0	0	0	0	0	0	0	0	0	0	0	0	0	0	0	0	0	0	0	0	0	0	0	0	5.19561	0	0	0	0	17.9206	0
774	195.85	0	0	0	0	0	0	0	0	0	0	0	0	0	0	0	0	0	0	0	0	0	0	0	0	0	0	0	0	0	0	0	0	0	1.14698	0	0	0	0	0	0	0	14.2295	0	0	0	0	0	0
775	196.103	0	0	0	0	0	0	0	0	0	0	0	0	0	0	1.49837	0	0	0	0	0	0	0	0	0	0	0	0	0	0	0	0	0	0	0	0	8.29804	0	0	0	0	0	4.44475	0	0	0	0.482315	0	0
776	196.357	0	0	0	0	0	0	0	0	0	0	0	0	0	0	0	0	0	0	0	0	0	0	0	0	0	0	0	0	0	0	0	28.2091	0	0	0	0	0	0	0	0	0	0	0	0	0	0	0.904159	0
777	196.61	0	0	0	0	0	0	0	0	0	0	0	0	0	0	0	0	0	0	0	0	0	0	0	0	0	0	0	0	0	0	4.2161	0	0	0	0	0	0	0	0	0	33.9505	0	0	0	0	0	0	0
778	196.864	0	0	0	0	0	0	0	0	0	0	0	0	0	0	0	0	0	0	0	0	0	0	0	0	0	0	0	0	0	0	0	0	0	0	0	73.7263	0	0	0	0	0	0	0	37.0466	0	0	0	0
779	197.117	0	0	0	0	0	0	0	0	0	0	0	0	0	0	0	0	0	0	0	0	0	0	0	0	0	0	0	0	0	0	0	0	0	0	0	0	0	0	0	0	0	0	0	293.743	0	0.947188	0	0
780	197.37	0	0	0	0	0	0	0	0	0	0	0	0	0	0	0	0	0	0	0	0	0	0	0	0	0	0	0.00780301	0	0	0	0	0	0	0.128396	0	0	0	0	3.80546	0	0	0	0	0	0	0	0	0
781	197.624	0	0	0	0	0	0	0	0	0	0	0	0	0	0	0	0	0	0	0	0	0	0	0	0	0	0	0	0	0	0	0	44.6366	0	0	0	0	0	0	0	0	0	0	0	3.27598	0	0	0	0
782	197.877	0	0	0	0	0	0	0	0	0	0	0	0	0	0	0	0	0	0	0	0	0	0	0	0	0	0	0	0	0	0	0	0	0	1.27141	0	0	0	0	0	0	0	0	0	0	0	0	0	0
783	198.13	0	0	0	0	1.33049	0	0	0	0	0	0	0	0	0	0	0	0	0	0	0	0	0	0	0	0	0	0	0	0	0	0	0	0	0	0	0	0	0	0	0	26.3026	0	0	0	0	0	0	0
784	198.384	0	0	0	0	0	0	0	0	0	0	0	0	0	0	0	0	0	0	0	0	24.465	0	0	0	0.222301	0	0	0	0	0	0	0	0	0.63624	0	5.48853	0	0	0	0	0	0	0	0	0	0	0	0
785	198.637	0	0	0	0	0	0	0	0	0	0	0	0	0	0	0	0	0	0	0	0	0	0	0	0	0	0	0	0	0	0	0	0	0	9.52382	0	0	0	0	66.8619	0	0	0	0	0	0	0	0.873002	0
786	198.89	0	0	0	0	0	0	0	0	0	0	0	0	0	0	1.59702	0	0	0	0	0	0	0	0	0	0	0	0	0	0	0	0	0	0	0	0	0	0	0	11.8636	0	0	0	0	0	0	0	25.9631	0
787	199.144	0	0	0	0	0	0	0	0	0	0	0	0	0	0	0	0	0	0	0	0	0	0	0	0	0	0	0	0	0	0	0	0	0	0.366876	0	0	0	0	0	0	0	0	0	0	0	0	1.39893	0
788	199.397	0	0	0	0	15.0723	0	0	0	0	0	0	0	0	0	0	0	0	0	0	0	0	0	0	0	0	0	0	0	0	0	0	0.073211	0	0	0	0	0	0	0	0	4.4831	0	0	0	0.983551	0	0	0
789	199.651	0	0	0	0	0	0	0	0	0	0	0	0	0	0	0	0	0	0	0	0	0	0	0	0	0	0	0	0	0	0	0	0	0	68.4712	0	0	0	0	0	0	0	4.87265	0	91.4283	0	0	0.291518	0
790	199.904	0	0	0	0	0	0	0	0	0	0	0	0	0	0	0	0	0	0	0	0	15.9261	0	0	0	0	0	0	0.387747	0	0	0	0	0	0	0	0	4.70057	0	0	0	0	0	0	0	0	0	0	0
791	200.157	0	0	0	0	0	0	0	0	0	0.0819218	0	0	0	0	0	0	0	0	0	0	0	0	0	0	0	0	0	0	0	0	0	0	0	1.12125	0	0.0498019	58.3217	0	2.4317	0	0	0	0	0	0	0	0	0
792	200.411	0	0	0	0	0	0	0	0	0	0	0	0	0	0	0	0	0	0	0	0	0	0	0	0	0	0	0	0	0	0	0	0	0	0.255415	0	0.562243	0.0124011	0	0	0	0	0.920775	0	9.26125	0	0	0	0
793	200.664	0	0	0	0	0	0	0	0	0	0	0	0	0	0	0.0804377	0	0	0	0	0	0	0	0	0	0	0	0	0.986862	0	0	0	0	0	6.03748	0	0	48.0443	0	0	0	0	18.2918	0	0	0	0	0	0
794	200.917	0	0	0	0	0	0	0	0	0	0	0	0	0	0	0	0	0	0	0	0	0	0	0	0	0	0	0	0.209856	0	0	0	0	0	0	0	3.83843	0	0	0	0	0	0	0	83.5217	0	0	0	0
795	201.171	0	3.44261	0	0	0	0	0	0	0	0	0	0	0	0	0	0	0	0	0	0	0	0	0	0	0	0	0	0	0	0	0	0	0	0	0	0	67.7626	0	0	0	0	0	0	0	0	0	10.2807	0
796	201.424	0	0	0	0	0	0	0	0	0	0	0	0	0	0	0	0	0	0	0	0	0	0	0	0	0	0	0	0	0	0	0	0	0	0	0	0	0	0	0	0	0	0	0	0	0.84299	0	0	0
797	201.677	0	0	0	0	0	0	0	0	0	0.00471259	0	0	0	0	0.121766	0	0	0	0	0	0	0	0	0	0	0	0	0	0	0	0	0	0	0	0	0	0	0	0	0	0	0	0	0	0	0	0	0
798	201.931	0	0	0	0	0	0	0	0	0	0	0	0	0	0	0	0	0	0	0	0	0	0	0	0	0	0	0	0	0	0	0	0	0	0	0	0	0	0	0	0	0	0	0	0	0	0	0	0
799	202.184	0	0	0	0	0	0	0	0	0	0	0	0.462758	0	0	0	0	0	0	0	0	0	0	0	0	0	0	0	0	0	0	0	0	0	0.476339	0	44.194	0.129592	0	0	0	0	0	0	0	0	0	0	0
800	202.438	0	0	0	0	0	0	0	0	0	0	0	0	0	0	0	0	0	0	0	0	0	0	0	0	0	0	0	0	0	0	0	0	0	0	0	0	74.8399	0	0	0	0	0	0	0	0	0	0	0
801	202.691	0	0	0	0	0.0932257	0	0	0	0	0	0	0	0	0	0	0	0	0	0	0	0	0	0	0	0	0	0	0	0	0	0	0	0	0	0	0	147.725	0	0	0	0	0.170297	0	0	0	0	0	0
802	202.944	0	0	0	0	0	0	0	0	0	0	0	0	0	0	0	0	0	0	0	0	0	0	0	0	0	0	0	0	0	0	0	0	0	0	0	3.14348	0	0	0	0	0	0	0	0	0	0	0	0
803	203.198	0	0	0	0	0	0	0	0	0	0	0	0	0	0	0	0	0	0	0	0	0	0	0	0	0	0	0	0	0	0	0	0	0	3.70162	0	0	0	0	0	0	0	0	0	0	0	0	0	0
804	203.451	0	0	0	0	0	0	0	0	0	0	0	0	0	0	0	0	0	0	0	0	0	0	0	0	0	0	0	0	0	0	0	0	0	0.217044	0	0	33.5893	0	0	0	0	12.8944	0	0	0	0	0	0
805	203.704	0	0	0	0	0	0	0	0	0	0	0	0	0	0	0	0	0	0	0	0	0	0	0	0	0	0	0	0	0	0	0	0	0	0	0	0	0	0	0	0	0	0	0	16.8866	0	0	0.031516	0
806	203.958	0	0	0	0	22.8389	0	0	0	0	0	0	0	0	0	0	0	0	0	0	0	0	0	0	0	0	0	0	0	0	0	0	0	0	0	0	0	226.562	0	0	0	0	0	0	0	2.75543	0	0	0
807	204.211	0	0	0	0	1.71978	0	0	0	0	0	0	0	0	0	0	0	0	0	0	0	0	0	0	0	0	0	0	0	0	0	0	0	0	0	0	0	10.4332	0	0	0	20.7649	7.75064	0	0	0	0	0	0
808	204.464	0	0	0	0	0	0	0	0	0	0	0	0	0	0	0	0	0	0	0	0	0	0	0	0	0	0	0	0	0	0	0	0	0	0	0	0	0	0	7.07608	0	0	0	0	0	0	2.83638	0	0
809	204.718	0	0	0	0	0	0	0	0	0	0	0	0	0	0	0	0	0	0	0	0	0	0	0	0	0	0	0	0	0	0	0	0.0733452	0	0	0	0	0	0	0	0	0	0	0	24.4724	0	0	0	0
810	204.971	0	0	0	0	0	0	0	0	0	0	0	0	0	0	0	0	0	0	0	0	0	0	0.0559078	0	0	0	0	0	0	0	0	0	0	0	0	0	0	0	0	0	0	2.3079	36.2771	0	0	0	0	0
811	205.225	0	0	0	0	0	0	0	0	0	0	0	0	0	0	0.501674	0	0	0	0	0	0	0	0	0	0	0	0	0	0	0	0	0	0	0	0	4.39134	0	0	0	0	0	0	7.31098	0	0	0	0	0
812	205.478	0	0	0	0	0	0	0	0	0	0	0	0	0	0	0	0	0	0	0	0	0	0	0	0	0	0	0	0	0	0	0	8.92581	0	0	0	0	0	0	0	0	0.0366982	0	0	0	0	0	0	0
813	205.731	0	0	0	0	0	0	0	0	0	0	0	0	0	0	0	0	0	0	0	0	0	0	0	0	0	0	0	0	0	0	0	0	0	0	0	0	0	0	0	0	0	0	0	0	0	0	0	0
814	205.985	0	0	0	0	0	0	0	0	0	0	0	0	0	0	0	0	0	0	0	0	0	0	0	0	0	0	0	0	0	0	0	0	0	0	0	0	0	0	0	0	1.07079	0	0	0	0	0	0	0
815	206.238	0	0	0	0	0	0	0	0	0	0	0	0	0	0	0	0	0	0	0	0	0	0	0	0	0	0	0.00305884	0	0	0	0	0	0	0.661922	0	0	0	0	0	0	0	0	0	0	0	0	0	0
816	206.491	0	0	0	0	0	0	0	0	0	0	0	0	0	0	4.84293	0	0	0	0	0	0	0	0	0	0	0	0	0	0	0	0	0	0	0	0	5.27024	0	0	0	0	0	0	0	0	0	0.815508	0	0
817	206.745	0	0	0	0	0	0	0	0	0	0	0	0	0	0	0.0811087	0	0	0	0	0	0	0	0	0	0	0	0	0	0	0	0	0	0	0.266494	0	0	0	0	0	0	0	0	0	0	0	0	0	0
818	206.998	0	0	0.0314568	0	0	0	0	0	0	0	0	0	0	0	0	0	0	0	0	0	0	0	0	0	0	0	0	0	0	0	0	0	0	179.853	0	0	0	0	0	0	33.4942	0	0	0	0	0	0	0
819	207.251	0	0	0	0	0	0	0	0	0	0	0	0	0	0	0	0	0	0	0	0	0	0	0	0	0	0	0	0	0	0	0	0	0	0	0	0	0	0	0	0	0	0	0	0	0	0	0	0
820	207.505	0	0	0	0	0	0	0	0	0	0	0	0	0	0	0	0	0	0	0	0	0	0	0	0	0	0	0	0	0	0	0	0	0	1.29462	0	3.59365	0	0	0	0	0	0	0	0	0	0	1.81045	0
821	207.758	0	0	0	0	0	0	0	0	0	0	0	0	0	0	0	0	0	0	0	0	0	0	0	0	0	0	0	0	0	0	0	0	0	19.2053	0	0	0	0	0.168493	0	0	0	0	0	0	0	0	0
822	208.012	0	0	0	0	0	0	0	0.869754	0	0	0	0	0	0	0	0	0	0	0	0	0	0	0	0	0	0	0	0	0	0	0	0	0	0	0	0	0	0	0	0	0	8.91699	0	0	0	10.6535	0	0
823	208.265	0	0	0	0	0	0	0	0	0	0	0	0	0	0	0	0	0	0	0	0	0	0	0	0	0	0	0	0	0	0	0	0	0	0.158006	0	5.00529	0	0	0	0	0	8.73767	0	0.134727	0	0	0	0
824	208.518	0	0	0	0	0	0	0	0	0	0	0	0	0	0	0	0	0	0	0	0	0	0	0	0	0	0	0	0	0	0	0	0	0	1.16102	0	0	0	0	0	0	0	0	49.7276	0	0	72.2307	0	0
825	208.772	0	0	0	0	0	0	0	0.0594047	0	0	0	0	0	0	0	0	0	0	0	0	0	0	0	0	0	0	0	0	0	0	0	0	0	1.40676	0	0	0	0	0	0	0	0	45.1596	0	0	0	0	0
826	209.025	0	0	0	0	0	0	0	0	0	0	0	0	0	0	0	0	0	0	0	0	0	0	0	0	0	0	0	0	0	0	0	0	0	0	0	0	0	0	0	0	0	0	0	0	0	0	0	0
827	209.278	0	0	0	0	1.31833	0	0	0	0	0	0	0	0	0	0	0	0	0	0	0	0	0	0	0	0	0	0	0	0	0	0	0	0	0.323752	0	3.14729	65.8347	0	0	0	0	0	62.9343	0	0.305067	0	0	0
828	209.532	0	0	0	0	0	0	0	0	0	0	0	0	0	0	0	0	0	0	0	0	0	0	0	0	0	0	0	0	0	0	0	0	0	8.48891	0	0.914622	0	0	0	0	0	13.8449	0	0	0	0	0	0
829	209.785	0	0	0	0	0	0	0	0	0	0	0	0	0	0	0	0	0	0	0	0	0	0	0	0	0	0	0	0	0	0	0	0	0	52.0115	0	0	33.7656	0	2.30456	0	0	0	0	0	0	0	0	0
830	210.038	0	0	0	0	0	0	0	0	0	0	0	0	0	0	0.789269	0	0	0	0	0	0	0	0	0	0	0	0	0	0	0	0	0	0	0.24702	0	0	0	0	0	0	0	31.8415	0	8.03744	0	0	0	0
831	210.292	0	0	0	0	0	0	0	0	0	0	0	0	0	0	0	0	0	0	0	0	0	0	0	0	0	0	0	0	0	0	0	0	0	0	0	0	0	0	0	0	0	0	0	9.11823	0	0	30.3107	0
832	210.545	0	0	0	0	0	0	0	0	0	0	0	0	0	0	0	0	0	0	0	0	0	0	0	0	0	0	0	0	0	0	0	0	0	0	0	0	0	0	15.0866	0	0	0	0	0	0	0	0	0
833	210.799	0	0	0	0	0	0	0	0	0	0	0	0	0	0	0	0	0	0	0	0	0	0	0	0	0	0	0	0	0	0	0	0	0	0	0	0	0	0	0	0	0	0	0	0	0	0	0	0
834	211.052	0	0	0	0	0	0	0	0	0	0	0	0	0	0	0	0	0	0	0	0	0	0	0	0	0	0	0.0860818	0	0	0	0	0	0	0	0	9.73088	0	0	0	0	0	0	0	0	0	241.999	19.9235	0
835	211.305	0	0	0	0	0	0	0	0	0	0	0	0	0	0	0	0	0	0	0	0	0	0	0	0	0	0	0	0	0	0	0	0	0	3.93785	0	10.3229	0	0	0	0	0	0	0	0	0	0	0	0
836	211.559	0	0	0	0	0	0	0	0	0	0	0	0	0	0	0	0	0	0	0	0	0	0	0	0	0	0	0	0	0	0	0	0	0	0	0	0	0	0	3.23568	0	0	0	0	0	0	47.1732	0	0
837	211.812	0	0	0	0	0	0	0	0	0	0	0	0	0	0	0	0	0	0	0	0	0	0	0	0	0	0	0	0	0	0	0	0	0	0	0	0	0	0	0	0	0	0	0	0	0	0	0	0
838	212.065	0	0	0	0	0	0	0	0	0	0	0	0	0	0	0	0	0	0	0	0	0	0	0	0	0	0	0	0	0	0	0	0	0	0.157367	0	0	0	0	0	0	0	2.7275	0	0	0	0	0	0
839	212.319	0	0	0	0	0	0	0	0	0	0	0	0	0	0	0	0	0	0	0	0	0	0	0	0	0	0	0	0	0	0	0	0	0	0	0	1.69816	0	0	53.8678	0	0	0	0	0.810057	0	0	0	0
840	212.572	0	0	0	0	0	0	0	0	0	0	0	0	0	0	0	0	0	0	0	0	0	0	0	0	0	0	0	0	0	0	0	0	0	20.4789	0	0	0	0	0	0	0	24.7942	0	0	0	0	0	0
841	212.825	0	0	0	0	0	0	0	0	0	0	0	0	0	0	0.351582	0	0	0	0	0	0	0	0	0	0	0	0	0	0	0	0	0	0	0	0	8.2066	0	0	0	0	0	0	0	0.962407	0	0	0	0
842	213.079	0	0	0	0	0	0	0	0	0	0	0	0	0	0	0	0	0	0	0	0	0	0	0	0	0	0	0	0	0	0	0	0	0	0	0	0	5.52407	0	0	0	0	0	0	0	0	0	0	0
843	213.332	0	0	0	0	0	0	0	0	0	0	0	0	0	0	0	0	0	0	0	0	0	0	0	0	0	0	0	0	0	0	0	0	0	0.169085	0	0	0	0	0	0	0	0	0	0	0	0	0	0
844	213.586	0	0	0	0	0	0	0	0	0	0	0	0	0	0	0	0	0	0	0	0	0	0	0	0	0	0	0	0	0	0	0	0	0	0	0	0	0	0	23.3776	0	0	0	0	30.173	0	0	0	0
845	213.839	0	7.39614	0	0	0	0	0	0	0	0	0	0	0	0	0	0	0	0	0	0	0	0	0	0	0	0	0	0	0	0	0	0	0	0	0	0	0.0297478	0	0	0	0	19.3344	0	0	0	0	0	0
846	214.092	0	0	0	0	0	0	0	0	0	0	0	0	0	0	0	0	0	0	0	0	0	0	0	0.0742569	0	0	0	0	0	0	0	0	0	0	0	0	0	0	0	0	0	0	0	0.358169	0	0	0	0
847	214.346	0	0	0	0	0	0	0	0	0	0	0	0	0	0	0	0	0	0	0	0	0	0	0	0	0	0	0	0	0	0	0	0	0	0	0	0	0	0	0	0	0	13.1409	0	0	0	0	0	0
848	214.599	0	0	0	0	0	0	0	0	0	0	0	0	0	0	0	0	0	0	0	0	0	0	0	0	0	0	0	0	0	0	0	0	0	0	0	0	0	0	0	0	0	0	0	0	0	0	0	0
849	214.852	0	0	0	0	0	0	0	0	0	0	0	0	0	0	0	0	0	0	0	0	0	0	0	0	0	0	0.159652	0	0	0	0	0	0	0	0	0	0	0	60.0899	0	0	0	0	0	0	0	0	0
850	215.106	0	0	0	0	0	0	0	0	0	0	0	0	0	0	0	0	0	0	0	0	0	0	0	0	0	0	0.414053	0	0	0	0	0	0	0.241443	0	0	0	0	0	0	0	0	0	0	0	0	0.290851	0
851	215.359	0	0	0	0	0	0	0	0	0	0	0	0	0	0	7.73183	0	0	0	0	0	0	0	0	0	0	0	0	0	0	0	0	0	0	0	0	0	0	0	0	0	0	0	0	0	17.8639	0	0	0
852	215.612	0	0	0	0	0	0	0	0	0	0	0	0	0	0	0	0	0	0	0	0	0	0	0	0	0	0	0	0	0	0	0	0	0	0	0	0	0	0	0	0	0	13.3233	0	88.7111	0	0	0	0
853	215.866	0	0	0	0	0	0	0	0	0	0	0	0	0	0	0.157079	0	0	0	0	0	0	0	0	0	0	0	0	0	0	0	0	0	0	0	0	0	0	0	0	0	0	0	73.9815	0	0	0	0	0
854	216.119	0	0	0	0	0	0	0	0	0	0	0	0	0	0	0	0	0	0	0	0	0	0	0	0	0.230704	0	0	0	0	0	0	0	0	1.01215	0	0	0	0	0	0	0	0	0	0	0	0	0	0
855	216.373	0	0	0	0	0	0	0	0	0	0	0	0	0	0	0	0	0	0	0	0	0	0	0	0	0	0	0	0.337002	0	0	0	0	0	0.0976817	0	10.1446	0	0	15.9271	0	0	6.11062	0	0	0	0	0	0
856	216.626	0	0	0	0	0	0	0	0	0	0	0	0	0	0	0	0	0	0	0	0	0	0	0	0	0	0	0	0	0	0	0	0	0	0	0	0	0	0	0	0	0	0	0	0	0	0	0	0
857	216.879	0	0	0.713469	0	0	0	0	0	0	0	0	0	0	0	0	0	0	0	0	0	0	0	0	0	0	0	0	0	0	0	0	0	0	12.6588	0	0	5.36371	0	0	0	0	0	0	0	0	0	0	0
858	217.133	0	0	0	0	0	0	0	0	0	0	0	0	0	0	0	0	0	0	0	0	0	0	0	0	0	0	0	0	0	0	0	0	0	0	0	0	0	0	49.4171	0	0	0	0	0	0.0731873	0	0	0
859	217.386	0	0	0	0	0	0	0	0	0	0	0	0	0	0	0	0	0	0	0	0	0	0	0	0	0	0	0	0	0	0	0	0	0	0	0	0	0	0	6.09962	0	0	12.7046	213.504	0	0	0	0	0
860	217.639	0	0	0	0	0	0	0	0	0	0	0	0	0	0	0	0	0	0	0	0	0	0	0	0	0	0	0	0	0	0	0	0	0	0	0	0	7.70188	0	0	0	0	0	0	0	0	0	0	0
861	217.893	0	0	0	0	0	0	0	0	0	0	0	0	0	0	0	0	0	0	0	0	0	0	0	0	0	0	0	0	0	0	0	0	0	0	0	0	0.240654	0	0	0	0	0	0	0	0	0	0.325666	0
862	218.146	0	0	0	0	0	0	0	0	0	0	0	0	0	0	0	0	0	0	0	0	0	0	0	0	0	0	0	0	0	0	0	0	0	0	0	1.47772	0	0	0	0	0	0	0	0	0	0	0	0
863	218.399	0	0	0	0	0	0	0	0	0	0	0	0	0	0	0	0	0	0	0	0	0	0	0	0	0	0	0	0	0	0	0	0.00289307	0	136.874	0	0	0	0	0	0	4.4461	0	0	0	0	0	0	0
864	218.653	0	0	0	0	0	0	0	0	0	0	0	0	0	0	0	0	0	0	0	0	0	0	0	0	0	0	0	0	0	0	0	0	0	0.78383	0	8.14166	0.153049	0	0	0	0	6.8556	0	0	0	0	5.59265	0
865	218.906	0	0	0	0	0	0	0	0	0	0	0	0	0	0	0.246827	0	0	0	0	0	0	0	0	0	0	0	0	0	0	0	0	0	0	0.0917693	0	0	0	0	0	0	0	0	0	0	0	0.47922	56.686	0
866	219.16	0	0	0	0	0	0	0	0	0	0	0	0	0	0	0	0	0	0	0	0	0	0	0	0	0	0	0	0	0	0	0	0.0793129	0	0	0	133.498	0	0	0	0	0	0	139.066	0	2.55644	0	0.74684	0
867	219.413	0	0	0	0	0	0	0	0	0	0	0	0	0	0	0	0	0	0	0	0	0	0	0	0	0	0	0	0	0	0	0	0	0	0	0	0	0	0	0.780451	0	0	0	0	0	0	0	0.10944	0
868	219.666	0	0	0	0	0	0	0	0	0	0	0	0	0	0	0	0	0	0	0	0	0	0	0	0	0	0	0	0	0	0	0	0	0	14.8361	0	2.8423	0	0	0	0	0	0	10.486	0	0	0	0	0
869	219.92	0	0	0	0	0	0	0	0	0	0	0	0	0	0	0	0	0	0	0	0	0	0	0	0	0	0	0	0	0	0	0	0	0	0	0	0	0	0	0	0	0	0	94.2161	0	0	0	0	0
870	220.173	0	0	0	0	0	0	0	0	0	0	0	0	0	0	0	0	0	0	0	0	0	0	0	0	0	0	0.0128274	0	0	0	0	0	0	0	0	0.0913746	0	0	0	0	45.4694	0	0	66.5914	0.606693	0	0	0
871	220.426	0	0	0	0	0	0	0	0	0	0	0	0	0	0	0	0	0	0	0	0	0	0	0	0	0	0	0	0	0	0	0	0	0	0.960276	0	0	0	0	0	0	0	6.45647	0	0	0	0	0	0
872	220.68	0	0	0	0	0	0	0	0	0	0	0	0	0	0	0.11339	0	0	0	0	0	0	0	0	0	0	0	0	0	0	0	0	0	0	0	0	3.38562	0	0	0	0	0	0	0	0	0	0	0	0
873	220.933	0	0	0	0	0	0	0	0	0	0	0	0	0	0	0.0746319	0	0	0	0	0	0	0	0	0	0	0	0	0	0	0	0	0	0	113.636	0	0	0	0	0.41279	0	0	0	0	0	0	0	1318.93	0
874	221.186	0	0	0	0	0	0	0	0	0	0	0	0	0	0	0	0	0	0	0	0	0	0	0	0	0	0	0	0	0	0	0	0	0	0	0	18.8184	0	0	0	0	0	0	0	117.178	0	0	0	0
875	221.44	0	0	0	0	0	0	0	0	0	0	0	0	0	0	0	0	0	0	0	0	0	0	0	0	0	0	0	0	0	0	0	0	0	0	0	0	0	0	0	0	0	0	0	0	0	0	0	0
876	221.693	0	0	0	0	0	0	0	0	0	0	0	0	0	0	0	0	0	0	0	0	0	0	0	0	0	0	0	0	0	0	0	0	0	10.1397	0	0	0	0	0	0	0	0	0	0	0	0	0	0
877	221.947	0	0	0	0	0	0	0	0	0	0	0	0	0	0	0	0	0	0	0	0	0	0	0	0	0	0	0	0	0	0	0	0	0	0.0372705	0	0	0	0	0.721481	0	0	0	0	0	0	0	0	0
878	222.2	0	0	0	0	0	0	0	0	0	0	0	0	0	0	0	0	0	0	0	0	0	0	0	0	0	0	1.21877	0	0	0	0	0	0	0	0	0	0	0	0	0	0	0	0	0	0	0	0	0
879	222.453	0	6.24949	0	0	0	0	0	0	0	0	0	0	0	0	0	0	0	0	0	0	0	0	0	0	0	0	0	0	0	0	0.0558288	0.0728518	0	0	0	65.1915	0	0	0	0	0	0	0	0	0	0	33.7724	1.20151
880	222.707	0	0	0	0	0	0	0	0	0	0	0	0	0	0	0	0	0	0	0	0	0	0	0	0	0	0	0	0	0	0	0	0	0	0	0	0	0	0	0	0	0	0	0	0	0	0	0	0
881	222.96	0	0	0	0	0	0	0	0	0	0	0	0	0	0	0	0	0	0	0	0	0	0	0	0	0	0	0	0	0	0	0	0	0	0	0.102371	98.9305	0	0	23.5703	0	0	0	126.297	0	0	0	0	0
882	223.213	0	0	0	0	0	0	0	0	0	0	0	0	0	0	0	0	0	0	0	0	0	0	0	0	0	0	0	0	0	0	0	0	0	0	0	0	0	0	0	0	0	0	0	0	0	0	0	0
883	223.467	0	0	0	0	0	0	0	0	0	0	0	0	0	0	0	0	0	0	0	0	0	0	0	0	0	0	0	0	0	0	0	0	0	0	0	11.3851	0	0	0	0	0	0	0	0	2.59361	0	0	0
884	223.72	0	0	0	0	0	0	0	0	0	0	0	0	0	0	0	0	0	0	0	0	0	0	0	0	0	0	0	0	0	0	0	0	0	0	0	0	2.01147	0	0	0	0	0	0	0	0	0	0	0
885	223.973	0	0	0	0	0	0	0	0	0	0	0	0	0	0	0	0	0	0	0	0	0	0	0	0	0	0	0	0	0	0	0	0	0	94.6471	0	0	0	0	0	0	0	0	0	0	0	0.67885	17.206	0
886	224.227	0	0	0	0	0	0	0	0	0	0	0	0	0	0	0	0	0	0	0	0	0	0	0	0	0	0	0	0	0	0	0	0	0	85.1744	0	0	0	0	0	0	0	0	0	0	0	0	0	0
887	224.48	0	0	0	0	0	0	0	0	0	0	0	0	0	0	0	0	0	0	0	0	0	0	0	0	0	0	0	0	0	0	0	0	0	2.63629	0	0	0.00134194	0	0	0	0	0	0	0	0	0	34.4387	0
888	224.734	0	0	0	0	0	0	0	0	0	0	0	0	0	0	0	0	0	0	0	0	0	0	0	0	0	0	0	0	0	0	0	0	0	0	0	0	0	0	0	0	0	0	0	0	0	0	0.0879605	0
889	224.987	0	0	0	0	0	0	0	0	0	0	0	0	0	0	0	0	0	0	0	0	0	0	0	0	0	0	0	0	0	0	0	0	0	0	0	11.4192	0	0	0	0	0	0	69.6462	0	0	0	0	0
890	225.24	0	4.91093	0	0	0	0	0	0	0	0	0	0	0	0	0	0	0	0	0	0	0	0	0	0	0	0	0	0	0	0	0	0	0	0	0	0	0	0	0	0	0	0	245.194	0	0	0	0	0
891	225.494	0	0	0	0	0	0	0	0	0	0	0	0	0	0	0	0	0	0	0	0	0	0	0	0	0	0	0	0	0	0	0	0	0	12.7581	0	0	0	0	1.63487	0	0	0	91.3026	0	0	0	0	0
892	225.747	0	0	0	0	0	0	0	0	0	0	0	0	0	0	0	0	0	0	0	0	0	0	0	0	0	0	0	0	0	0	0	0	0	3.38772	0	0	0	0	0	0	0	0	141.671	0	0	0	0	0
893	226	0	0	0	0	0	0	0	0	0	0	0	0	0	0	0	0	0	0	0	0	0	0	0	0	0	0	0	0	0	0	0	0	0	0	0	0	0	0	0	0	0	2.81573	0	0	0	0	0	0
894	226.254	0	0	0	0	0	0	0	0	0	0	0	0	0	0	0	0	0	0	0	0	0	0	0	0	0	0	0	0.538104	0	0	0	0	0	2.56497	0	0	0.0352024	0	0	0	0	0	0	0	0	0	16.4844	0
895	226.507	0	0	0	0	0	0	0	0	0	0	0	0	0	0	0	0	0	0	0	0	0	0	0	0	0	0	0	0	0	0	0	0	0	0.379202	0	0	0	0	0	0	0	6.5082	16.1863	0	0	0	0	0
896	226.76	0	0	0	0	0	0.0149706	0	0	0	0	0	0	0	0	0	0	0	0	0	0	0	0	0	0	0	0	0	0	0	0	0	0	0	216.079	0	0	0	0	0	0	0	0	0	0	0	0	0	0
897	227.014	0	0	0	0	0	0	0	0	0	0	0	0	0	0	0	0	0	0	0	0	0	0	0	0	0	0	0	0	0	0	0	0	0	0	0	0	0	0	0	0	0.136559	0	0	0	0	0	0	0
898	227.267	0	0	0	0	0	0	0	0.800233	0	0	0	0	0	0	0.086366	0	0	0	0	0	0	0	0	0	0	0	0	0	0	0	0	0	0	0	0	0	1.12635	0	0	0	0	0	45.6552	0	0	0	0	0
899	227.521	0	5.72171	0	0	0	0	0	0	0	0	0	0	0	0	0	0	0	0	0	0	0	0	0	0	0	0	0	0	0	0	0	0	0	2.5797	0	0	0	0	0	0	0	0	109.644	0	0	0	0.18074	0
900	227.774	0	0	0	0	0	0	0	78.2007	0	0	0	0	0	0	0	0	0	0	0	0	0	0	0	0	0	0	0	0	0	0	0	0	0	2.57256	0	0	0	0	0	0	0	0	0	0	0	0	0	0
901	228.027	0	0	0	0	0	0	0	0	0	0	0	0	0	0	0	0	0	0	0	0	0	0	0	0	0	0	0	0	0	0	0	0	0	0	0	0	0	0	0	0	0	0	0	0	0	3.03456	0	0
902	228.281	0	0	0	0	0	0	0	0	0	0	0	0	0	0	0	0	0	0	0	0	0	0	0	0	0	0	0	0	0	0	0	0	0	5.60198	0	0	0	0	0	0	0	0	0	0	0	0	0	0
903	228.534	0	0	0.885826	0	0	0	0	0	0	0	0	0	0	0	0	0	0	0	0	0	0.0907431	0	0	0	0	0	0	0	0	0	0	0	0	7.64298	0	0	0	0	0	0	0	0	0	0	0	0	0	0
904	228.787	0	4.43422	0	0	0	0	0	0	0	0	0	0	0	0	0	0	0	0	0	0	0	0	0	0	0	0	0	0	0	0	0	0	0	88.4589	0	0	0.0508873	0	0	0	0	0	0	0	0	0	0	0
905	229.041	0	0	0	0	0	0	0	0	0	0	0	0	0	0	0	0	0	0	0	0	0	0	0	0	0	0	0	0	0	0	0	0	0	0	0	0	0	0	0	0	54.1959	0	0	0	0	0	0	0
906	229.294	0	0	0	0	0	0	0	0	0	0	0	0	0	0	0	0	0	0	0	0	0	0	0	0	0	0	0	4.72086	0	0	0	0	0	0	0	0	0	0	0	0	0	10.2117	66.7312	0	0	0	0	0
907	229.547	0	0	0	0	0	0	0	0	0	0	0	0	0	0	0	0	0	0	0	0	0	0	0	0	0	0	0	0	0	0	0	0	0	0	0	0	0	0	0	0	0	0	123.726	0.130046	0	0	9.45261	0
908	229.801	0	0	0	0	0	0	0	0	0	0	0	0	0	0	0	0	0	0	0	0	0	0	0	0	0	0	0	0	0	0	0	0	0	0	0	0	0	0	0	0	0	0	0	0	0	0	0.0143825	0
909	230.054	0	0	0	0	0	0	0	0	0	0	0	0	0	0	0	0	0	0	0	0	0	0	0	0	0	0	0	0	0	0	0	0	0	0	0	0	0	0	191.871	0	0	0	0	0	0	0	0	0
910	230.308	0	0	0	0	0	0	0	0	0	0	0	0	0	0	0	0	0	0	0	0	0	0	0	0	0	0	0	0	0	0	0	0	0	8.71624	0	0	0	0	0	0	0	0	0	0	0	0	18.5794	0
911	230.561	0	0	0	0	0	0	0	0	0	0	0	0	0	0	0	0	0	0	0	0	0	0	0	0	0	0	0	0	0	0	0	0	13.3318	20.4244	0	0	0	0	0	0	0	0	0	0	0	0	0	0
912	230.814	0	0	0	0	0	0	0	0	0	0	0	0	0	0	0	0	0	0	0	0	0	0	0	0	0	0	0	0	0	0	0	0	0	10.4194	0	3.06531	0	0	0	0	0	0	0	0	0	0	0	0
913	231.068	0	0	0	0	0	0	0	0	0	0	0	0	0	0	0	0	0	0	0	0	0	0	0	0	0	0	0	0.272221	0	0	0	0	0	0	0	0	0	0	3.74866	0	0	0	0	0	0	0	0	0
914	231.321	0	0	0	0	0	0	0	0	0	0	0	0	0	0	0	0	0	0	0	0	0	0	0	0	0	0	0	0	0	0	0	0	0	0	0	0	10.2022	0	0	0	0	0	0	0	0	0	0	0
915	231.574	0	0	0	0	0	0	0	0	0	0	0	0	0	0	0	0	0	0	0	0	0	0	0	0	0	0	0	0	0	0	0	0	0	19.1095	0	0	0	0	0	0	0	0	87.3123	0	0	0	0	0
916	231.828	0	0	0	0	0	0	0	0	0	0	0	0	0	0	0	0	0	0	0	0	0	0	0	0	0	0	0	0	0	0	0	0	0	0	0	57.5293	0	0	0	0	0	0	0	0	0	0	0	0
917	232.081	0	0	0	0	0	0	0	0	0	0	0	0	0	0	0	0	0	0	0	0	0	0	0	0	0	0	0	0	0	0	0	0	0	0	0	0	0	0	165.985	0	31.0617	0	0	0	0	0	0	0
918	232.334	0	0	0	0	0	0	0	0	0	0	0	0	0	0	0	0	0	0	0	0	0	0	0	0	0	0	0	0	0	0	0	0	0	0	0	0	0	0	0	0	0	0	0	0	0	0	0	0
919	232.588	0	0	0	0	0	0	0	0	0	0	0	0	0	0	0	0	0	0	0	0	0	0	0	0	0	0	0	0	0	0	0	0	0	3.67723	0	0	33.742	0	0.962388	0	0	4.44946	0	0	0	0	0	0
920	232.841	0	0	0	0	0	0.0333157	0	0	0	0	0	0	0	0	0	0	0	0	0	0	0	0	0	0	0	0	0	0	0	0	0	0	0	0	0	0	0	0	194.553	0	0	0	74.4475	0	0	0	0	0
921	233.095	0	0	0	0	0	0	0.0322264	0	0	0	0	0	0	0	0	0	0	0	0	0	0	0	0	0	0	0	0	0.255471	0	0	0	114.873	0	0	0	0	0	0	0	0	0	0	0	0	0	0	0	0
922	233.348	0	0	0	0	0	0	0	0	0	0	0	0	0	0	0	0	0	0	0	0	0	0	0	0	0	0	0	0	0	0	0	0	0	0	0	0	0.197933	0	0	0	0	2.83058	0	0.289722	0	0	1.68955	0
923	233.601	0	0	0	0	0	0	0	0	0	0	0	0	0	0	0	0	0	0	0	0	0	0	0	0	0	0	0	0	0	0	0	0	0	0	0	0	0	0	0	0	0	0	0	0	0	0	0	0
924	233.855	0	0	0	0	0	0	0	0	0	0	0	0	0	0	0	0	0	0	0	0	0	0	0	0	0	0	0	0.285309	0	0	0	0	0	0	0	0	0	0	5.11438	0	0	0	0	0	0	0	30.6219	0
925	234.108	0	0	0	0	0	0	0	0	0	0	0	0	0	0	0	0	0	0	0	0	0	0	0	0	0	0	0	0	0	0	0	0	0	3.59834	0	0	0	0	0	0	0	0	0	0	0	0	0	0
926	234.361	0	0	0	0	0	0	0	0	0	0	0	0	0	0	0	0	0	0	0	0	0	0	0	0	0	0	0	0.040211	0	0	0	0	0	43.2821	0	0	5.31388	0	0	0	0	0	0	142.878	0	0	0	0
927	234.615	0	0	0	0	0	0	0	0	0	0	0	0	0	0	0	0	0	0	0	0	0	0	0	0	0	0	0	0	0	0	0	0	0	7.43618	0	0	0	0	327.294	0	0	4.65527	0	0	0	0	88.1838	0
928	234.868	0	0	0	0	0	0	0	0	0	0	0	0	0	0	0	0	0	0	0	0	0	0	0	0	0	0	0	0	0	0	0	118.958	0	73.4052	0	0.507741	0	0	0	0	0	0	0	0	0	0	0	0
929	235.121	0	0	0	0	0	0	0	0	0	0	0	0	0	0	0	0	0	0	0	0	0	0	0	0	0	0	0	0	0	0	0	0	0	0	0	0	0	0	0	0	0	0	0	0	0	6.97509	0	0
930	235.375	0	0	0	0	0	0	0	0	0	0	0	0	0	0	0	0	0	0	0	0	0	0	0	0	0	0	0	0	0	0	0	0	0	0	0	0	0	0	0	0	0	7.62091	0	0	0	0	0.00806351	0
931	235.628	0	0	0	0	0	0	0	0	0	0	0	0	0	0	0	0	0	0	0	0	0	0	0	0	0	0	0	0	0	0	0	0	0	0	0	0	0	0	0	0	0	0	0	0	0	0	0	0
932	235.882	0	0	0	0	0	0	0	0	0	0	0	0	0	0	0	0	0	0	0	0	0	0	0	0	0	0	0	0	0	0	0	0	0	0	0	588.925	0	0	0	0	0	0	550.09	0	0	0	0	0
933	236.135	0	0	0	0	0	0	0	0	0	0	0	0	0	0	0	0	0	0	0	0	0	0	0	0	0	0	0	0	0	0	0	0	0	0	0	0	0	0	0	0	0	0	0	0	0	0	0	0
934	236.388	0	0	0	0	0	0	0	0	0	0	0	0	0	0	0	0	0	0	0	0	0	0	0	0	0	0	0	0	0	0	0	0	0	0	0	89.4059	0	0	0	0	0	0	135.299	0	0	0	7.15965	0
935	236.642	0	0	0	0	0	0	0	0	0	0	0	0	0	0	0	0	0	0	0	0	0	0	0	0	0	0	0.322852	0	0	0	0	0	0	2.65171	0	0	0	0	0	0	0	0	0	0	0	0	0	0
936	236.895	0	0	0	0	0	0	0	0	0	0	0	0	0	0	0	0	0	0	0	0	0	0	0	0	0	0	0	0	0	0	0	0	0	0	0	14.1153	0	0	0	0	0	0	0	0	0	0	0	0
937	237.148	0	0	0	0	0	0	0	0	0	0	0	0	0	0	0	0	0	0	0	0	0	0	0	0	0	0	0	0	0	0	0	0	0	1.33926	0	0	7.86413	0	0	0	35.7178	13.2519	110.605	0	0	0	0	0
938	237.402	0	0	0	0	0	0	0	0	0	0	0	0	0	0	0	0	0	0	0	0	0	0	0	0	0	0	0	0	0	0	0	0	0	0	0	0	0	0	0.991859	0	0	9.03844	0	0	0	0	0	0
939	237.655	0	0	0	0	0	0	0	0	0	0	0	0	0	0	0	0	0	0	0	0	0	0	0	0	0	0	0	0	0	0	0	0	0	0	0	0	0	0	0	0	0	0	0	0	0	0	54.8272	0
940	237.908	0	0	0	0	0	0	0	0	0	0	0	0	0	0	0	0	0	0	0	0	0	0	0	0	0	0	0.0570405	0	0	0	0	0	0	12.4704	0	0	0	0	0	0	0	0	0	0	0	0	0	0
941	238.162	0	0	0	0	0	0	0	0	0	0	0	0	0	0	0	0	0	0	0	0	0	0	0	0	0	0	0	0	0	0	0	0	0	160.846	0	0	0	0	0	0	0	0	55.0341	132.562	0	0	0	0
942	238.415	0	0	0	0	0	0	0	0	0	0	0	0	0	0	0	0	0	0	0	0	0	0	0	0	0	0	0	0	0	0	0	0	0	0	0	0	0	0	9.42122	0	0	0	0	0	0	0	0	0
943	238.669	0	0	0	0	0	0	0	0	0	0	0	0	0	0	0	0	0	0	0	0	0	0	0	0	0	0	0	0.0526595	0	0	0	0	0	0	0	0	0	0	0	0	0	0	0	0	0	0	0	0
944	238.922	0	0	0	0	0	0	0	0	0	0	0	0	0	0	0	0	0	0	0	0	0	0	0	0	0	0	0	0	0	0	0	0	0	0	0	0	0	0	0	0	0	0	0	38.175	0	0	0	0
945	239.175	0	0	0	0	0	0	0	0	0	0	0	0	0	0	0	0	0	0	0	0	0	0	0	0	0	0	0	0	0	0	0	0	0	0	0	0	0	0	0	0	0	0	0	0	0	0	0	0
946	239.429	0	0	0	0	0	0	0	0	0	0	0	0	0	0	0	0	0	0	0	0	0	0	0	0	0	0	0	0	0	0	0	0	0	0	0	0	0	0	0	0	0	1.911	188.532	0	0	0	182.245	0
947	239.682	0	0	0	0	0	0	0	0	0	0	0	0	0	0	0	0	0	0	0	0	0	0	0	0	0	0	0	0	0	0	0	0	0	9.33912	0	0	0.437924	0	0	0	0	0	0	0	0	0	0	0
948	239.935	0	0	0	0	0	0	0	0	0	0	0	0	0	0	0	0	0	0	0	0	0	0	0	0	0	0	0	0	0	0	0	0	0	0	0	0	0	0	70.6562	0	0	0	267.661	0	0	0	0	0
949	240.189	0	0	0	0	0	0	0	0	0	0	0	0	0	0	0	0	0	0	0	0	0	0	0	0	0	0	0	0	0	0	0	0	0	78.765	0	0	0.00351668	0	0	0	0	0	96.1641	0	0	0	0.00927126	0
950	240.442	0	0	0	0	0	0	0	0	0	0	0	0.168971	0	0	0	0	0	0	0	0	0	0	0	0	0	0	0	0	0	0	0	0	0	0	0	0	0	0	0	0	0	0	0	0	0	0	0	0
951	240.695	0	0	0	0	0	0	0	92.8435	0	0	0	0	0	0	0	0	0	0	0	0	0	0	0	0	0	0	0	0	0	0	0	0	0	0	0	0	0	0	0	0	0	0	0	0	0	0	0.481884	0
952	240.949	0	0	0	0	0	0	0	0	0	0	0	0	0	0	0	0	0	0	0	0	0	0	0	0	0	0	0	0.607944	0	0	0	0	0	0	0	0	0	0	0	0	0	0	52.2064	99.5697	0	0	0	0
953	241.202	0	0	0	0	0	0	0	0	0	0	0	0	0	0	0	0	0	0	0	0	0	0	0	0	0	0	0	0	0	0	0	0	0	2.39888	0	0	0	0	0	0	0	0	0	0	0	0	4.178	0
954	241.456	0	1.82334	0	0	0	0	0	0	0	0	0	0	0	0	0	0	0	0	0	0	0	0	0	0	0	0	0	0	0	0	0	0	0	0.617389	0	48.2043	0.297193	0	0	0	0	0	235.999	0	0	0	0	0
955	241.709	0	0	0	0	0	0	0	0	0	0	0	0	0	0	0	0	0	0	0	0	0	0	0	0	0	0	0	0	0	0	0	0	0	0	0	0	0	0	0	0	0	0	0	0	0	0	0	0
956	241.962	0	1.25374	0	0	0	0	0	0	0	0	0	0.177133	0	0	0	0	0	0	0	0	0	0	0	0	0	0	0	0	0	0	0	0	0	0	0	0	0	0	169.373	0	0	0	0	0	0	0	0	0
957	242.216	0	0	0	0	0	0	0	0	0	0	0	0	0	0	0	0	0	0	0	0	0	0	0	0	0	0	0	0	0	0	0	0	0	0	0	0	0	0	0	0	0	0	0	0	29.7448	0	0	0
958	242.469	0	0	0	0	0	0	0	0	0	0	0	0	0	0	0	0	0	0	0	0	0	0	0	0	0	0	0	0.031887	0	0	0	0	0	102.941	0	0	0	0	0	0	0	0	0	0	0	0	0	0
959	242.722	0	0	0	0	0	0	0	0	0	0	0	0	0	0	0	0	0	0	0	0	0	0	0	0	0	0	0	0	0	0	0	0	0	0	0	0	0.0630753	0	0	0	0	0	0	0	0.00221421	0	0	0
960	242.976	0	0	0	0	0	0	0	0	0	0	0	0	0	0	0	0	0	0	0	0	0	0	0	0	0	0	0	0.69433	0	0	0	0	0	0	0	0	0	0	0	0	0	0	0	0	0	0	0	0
961	243.229	0	0	0	0	0	0	0	0	0	0	0	0	0	0	0	0	0	0	0	0	0	0	0	0	0	0	0	0	0	0	0	0	0	0	0	12.6045	0	0	0	0	0	0	0	0	0	0	0	0
962	243.482	0	0	0	0	0	0	0	98.1689	0	0	0	0	0	0	0	0	0	0	0	0	0	0	0	0	0	0	0	0	0	0	0	0	0	0	0	0	0	0	0	0	0	0	0	0	0	0	1.93116	0
963	243.736	0	0	0	0	0	0	0	0	0	0	0	0	0	0	0	0	0	0	0	0	0	0	0	0	0	0	0	0	0	0	0	0	0	0	0	0	0	0	0	0	0	0	0	0	0	0	0	0
964	243.989	0	0	0	0	0	0	0	0	0	0	0	0	0	0	6.06821	0	0	0	0	0	0	0	0	0	0	0	0	0	0	0	0	0	0	0	0	0.0864883	0	0	0	0	0	0	0	0	0	0	0	0
965	244.243	0	0	0	0	0	0	0	0	0	0	0	0	0	0	0	0	0	0	0	0	0	0	0	0	0	0	0	0	0	0	0	0	0	0	0	15.6603	0	0	0	0	0	0	0	0	0	0	0	0
966	244.496	0	0	0	0	0	0	0	0	0	0	0	0	0	0	0	0	0	0	0	0	0	0	0	0	0	0	0	0	0	0	0	0	0	0	0	0	0	0	0	0	0	3.34345	0	0	0	0	0	0
967	244.749	0	0	0	0	0	0	0	0	0	0	0	0	0	0	0	0	0	0	0	0	0	0	0	0	0	0	0	0	0	0	0	0	0	0	0	0	0	0	0	0	0	0	220.41	0	0	0	0	0
968	245.003	0	0	0	0	0	0	0	0	0	0	0	0	0	0	0.0789927	0	0	0	0	0	0	0	0	0	0	0	0	0	0	0	0	0	0	0	0	0	0	0	0	0	0	0	0	0	0	0	0	0
969	245.256	0	1.43596	0	0	0	0	0	0	0	0	0	0	0	0	0	0	0	0	0	0	0	0	0	0	0	0	0	0	0	0	0	0	0	0	0	113.472	0	0	0	0	0	0	0	0	0	0	0	0
970	245.509	0	0	0	0	0	0	0	0	0	0	0	0	0	0	0	0	0	0	0	0	0	0	0	0	0	0	0	0	0	0	0	0	0	168.191	0	22.9476	0	0	0	0	0	0	0	0	0	0	0	0
971	245.763	0	0	0	0	0	0	0	0	0	0	0	0	0	0	0	0	0	0	0	0	0	0	0	0	0	0	0	0	0	0	0	0	0	0	0	0	0	0	0	0	0	0	0	0	0.13481	0.00470075	0	0
972	246.016	0	0	0	0	0	0	0	0	0	0	0	0	0	0	0	0	0	0	0	0	0	0	0	0	0	0	0	0	0	0	0	0	0	0	0	0	0	0	0	0	0	0	0	0	0	0	0	0
973	246.269	0	0	0	0	0	0	0	0	0	0	0	0	0	0	0	0	0	0	0	0	0	0	0	0	0	0	0	0	0	0	0	0	0	3.50379	0	0	0	0	0	0	0	0	0	6.55027	16.1977	0	0	0
974	246.523	0	0	0	0	0	0	0	0	0	0	0	0	0	0	0	0	0	0	0	0	0	0	0	0	0	0	0	0	0	0	0	0	0	0	0	3.66463	0	0	0	0	39.4993	0	0	0	0	0	0	0
975	246.776	0	0	0	0	0	0	0	0	0	0	0	0	0	0	0	0	0	0	0	0	0	0	0	0	0	0	0	0	0	0	0	0	0	0	0	0	0	0	0	0	9.79682	0	0	0	0	0	0	0
976	247.03	0	0	0	0	0	0	0	0	0	0	0	0	0	0	0	0	0	0	0	0	0	0	0	0	0	0	0	0	0	0	0	0	0	0	0	0	0	0	0	0	0	0	0	0	0	0	0	0
977	247.283	0	0	0	0	0	0	0	102.797	0	0	0	0	0	0	0	0	0	0	0	0	0	0	0	0	0	0	0	0	0	0	0	0	0	0	0	0	0	0	112.385	0	0	0	0	0	0	0	0	0
978	247.536	0	0	0	0	0	0	0	0	0	0	0	0	0	0	0	0	0	0	0	0	0	0	0	0	0	0	0	0	0	0	0	0	0	15.8832	0	44.2416	0	0	0	0	0	0	0	0	0	0	0	0
979	247.79	0	0	0	0	0	0	0	0	0	0	0	0	0	0	0	0	0	0	0	0	0	0	0	0	0	0	0	0	0	0	0	0	0	0.0197108	0	0.773667	0	0	0	0	0	0	40.4057	73.9727	0	0	0	0
980	248.043	0	0	0	0	0	0	0	0	0	0	0	0	0	0	0	0	0	0	0	0	0	0	0	0	0	0	0	0.15715	0	0	0	0	0	0	0	0	0	0	0	0	0	0	0	0	0	0	0	0
981	248.296	0	0	0	0	0	0	0	0	0	0	0	0	0	0	0	0	0	0	0	0	0	0	0	0	0	0	0	0.225348	0	0	0	0	0	0	0	0	0	0	0	0	0	0	0	0	0	0	0	0
982	248.55	0	0	0	0	0	0	0	0	0	0	0	0	0	0	0	0	0	0	0	0	0	0	0	0	0	0	0	0	0	0	0	0	0	0	0	0	0	0	0	0	0	0	0	221.943	0	0	0	0
983	248.803	0	0	0	0	0	0	0	0	0	0	0	0	0	0	0	0	0	0	0	0	0	0	0	0	0	0	0	0	0	0	0	0	0	0	0	0	0	0	0	0	0	0	0	0	0.811956	0	0	0
984	249.056	0	0	0	0	0	0	0	0	0	0	0	0	0	0	0	0	0	0	0	0	0	0	0	0	0	0	0	0	0	0	0	0	0	88.5275	0	0	0	0	0	0	0	0	0	0	0	0	2.94542	0
985	249.31	0	0	0	0	0	0	0	0	0	0	0	0	0	0	0	0	0	0	0	0	0	0	0	0	0	0	0	0	0	0	0	0	0	0	0	0	0	0	0	0	0	0	0	0	0	0	0	0
986	249.563	0	0	0	0	0	0	0	0	0	0	0	0	0	0	0	0	0	0	0	0	0	0	0	0	0	0	0	0	0	0	0	0	0	11.8852	0	0.206873	0	0	0	0	0	0	0	0	0	0	0	0
987	249.817	0	2514.56	2748.63	0	1175.92	0.295346	2.63683	1.21321	0	0.387585	240.645	0	0	0	65.481	0.0289386	81.2284	556.753	0	0.235839	0.398005	0.163911	56244.2	0.305131	0	0	3.81831	29.4579	0	0	0.411018	112.434	12.107	51934.7	0.735342	2784.44	64033	10.7296	69672.1	0.202665	39097.6	1499.41	11555.9	34694.6	10706.8	2641.55	19719.6	3.12061
988	250.07	0	0	0	0	0	0	0	0	0	0	0	0	0	0	0	0	0	0	0	0	0	0	0	0	0	0	0	0	0	0	0	0	0	0	0	0	0	0	0	0	0	0	0	0	0	0	0	0
989	250.323	0	0	0	0	0	0	0	0	0	0	0	0	0	0	0	0	0	0	0	0	0	0	0	0	0	0	0	0	0	0	0	0	0	0	0	0	0	0	0	0	0	0	0	0	0	0	0	0
990	250.577	0	0	0	0	0	0	0	0	0	0	0	0	0	0	0	0	0	0	0	0	0	0	0	0	0	0	0	0	0	0	0	0	0	0	0	0	0	0	0	0	0	0	0	0	0	0	0	0
	250.83	0	0	0	0	0	0	0	0	0	0	0	0	0	0	0	0	0	0	0	0	0	0	0	0	0	0	0	0	0	0	0	0	0	0	0	0	0	0	0	0	0	0	0	0	0	0	0	0
	300
Region Mbbl	Oil	0	3018.16	3285.17	189.394	336.516	1881.63	274.787	1549.4	0	617.055	526.508	27.2995	0	90.619	13946.9	50.2984	55.5575	410.592	47.3124	119.484	178.692	2.16741	14626.1	9.19559	24.6719	129.108	2414.75	22343.2	4.50694	28.0332	126.715	789.877	13.653	284964	46.7205	132171	23968.2	422.063	150820	163.04	86336.4	10812.6	32027.6	83054.5	14393.4	9109.78	62760.9	15.6803
Region EJ	Oil	0	18.4651	20.0987	1.15871	2.0588	11.5118	1.68115	9.47922	0	3.77514	3.22118	0.167018	0	0.554407	85.3274	0.307725	0.339901	2.512	0.289457	0.731003	1.09324	0.0132602	89.4822	0.0562586	0.150943	0.789884	14.7734	136.696	0.0275735	0.171507	0.77524	4.83247	0.0835288	1743.41	0.285836	808.623	146.637	2.58218	922.715	0.997479	528.206	66.1515	195.945	508.127	88.0587	55.7336	383.971	0.095932
Global Mbbl	Oil	1.85886e+06
Global EJ	Oil	11372.5
[truncated: 13 more columns]

## Sheet: Gas Distributions
Rystad		1	2	3	4	5	6	7	8	9	10	11	12	13	14	15	16	17	18	19	20	21	22	23	24	25	26	27	28	29	30	31	32	33	34	35	36	37	38	39	40	41	42	43	44	45	46	47	48
	$/bbl
	Cost	BE	DK	DE	EL	ES	FR	IE	IT	LX	NL	AT	PT	FI	SW	UK	CZ	EN	CY	LV	LT	HU	MT	PL	SI	SK	BG	RO	NO	CH	IS	HR	TR	MK	US	JA	CA	AU	NZ	RS	RA	CN	IN	MX	BR	AR	CO	LA	KR
1	0	0	23.1454	0.729086	0	4.45256	0	6.13477	6.14609	0	58.9198	0.00307463	0	0	0	144.008	0	0	0	0	0	0.183653	0	0.00905418	0	0	0.97754	0.0169361	33.6438	0	0	0	0	0	8614.72	1.41774	118.092	21.3185	0.0115289	80.913	0	0	46.2015	67.6361	340.497	90.1579	19.0723	1694.65	0
2	0.253364	0	0	0	0	0	0	0	0	0	0	0	0	0	0	0	0	0	0	0	0	0	0	0	0	0	0	0	0	0	0	0	0	0	0	0	0	0	0	0	0	0	0	0	0	0	0	0	0
3	0.506727	0	0	0	0	0	0	0	0	0	0	0	0	0	0	0	0	0	0	0	0	0	0	0	0	0	0	0	0	0	0	0	0	0	3.02934	0	0	0	0	0	0	0	0	0	0	0	0	3.59851	0
4	0.760091	0	0	0	0	0	0	0	0	0	0	0	0	0	0	0	0	0	0	0	0	0	0	0	0	0	0	0	0	0	0	0	0	0	0	0	0	0	0	0	0	0	0	0	0	0	0	71.9597	0
5	1.01345	0	0	0	0	0	0	0	0	0	0	0	0	0	0	0	0	0	0	0	0	0	0	0	0	0	0	0	0	0	0	0	0	0	0	0	0	0	0	0	0	0	0	0	0	0	0	56.2256	0
6	1.26682	0	0	0	0	0	0	0	0	0	0	0	0	0	0	0	0	0	0	0	0	0	0	0	0	0	0	0	0	0	0	0	0	0	0	0	0	0	0	0	0	0	0	0	0	0	0	427.236	0
7	1.52018	0	0	0	0	0	0	0	0	0	0	0	0	0	0	0	0	0	0	0	0	0	0	0	0	0	0	0	0	0	0	0	0	0	0	0	0	0	0	0	0	0	0	0	0	0	0	90.9351	0
8	1.77355	0	0	0	0	0	0	0	0	0	0	0	0	0	0	0	0	0	0	0	0	0	0	0	0	0	0	0	0	0	0	0	0	0	0	0	3.88392	0	0	0.218978	0	0	0	0	0	0	0	1129.97	0
9	2.02691	0	0	0	0	0	0	0	0	0	0	0	0	0	0	0	0	0	0	0	0	0	0	0	0	0	0	0	0	0	0	0	0	0	0	0	16.8017	0	0	280.474	0	0	0	0	0	0	0	184.386	0
10	2.28027	0	0	0	0	0	0	0	0	0	0	0	0	0	0	0	0	0	0	0	0	0	0	0	0	0	0	0	0	0	0	0	0	0	1.68625	0	287.984	0	0	25.9972	0	0	0	0	0	0	0	248.611	0
11	2.53364	0	0	0	0	0	0	0	0	0	0	0	0	0	0	0	0	0	0	0	0	0	0	0	0	0	0	0	0	0	0	0	0	0	0	0	4.09532	0	0	0.0620294	0	0	0	1.77437	0	0.537386	0	325.736	0
12	2.787	0	0	0	0	0	0	0	0	0	0	0	0	0	0	0	0	0	0	0	0	0	0	0	0	0	0	0	0	0	0	0	0	0	6.41736	0	2.04916	0	0	63.2914	0	0	0	2.41759	0	0.559733	0	689.08	0
13	3.04036	0	0	0	0	0	0	0	0	0	4.04058	0	0	0	0	0	0	0	0	0	0	0	0	0	0	0	0	0	0	0	0	0	0	0	9.9436	0	1576.64	0	0	0	0	0	0	24.6216	0	1.28273	0	6.01933	0
14	3.29373	0	0	0	0	0	0	0	0	0	0	0	0	0	0	0	0	0	0	0	0	0	0	0	0	0	0	0	0	0	0	0	0	0	15.8042	0	248.842	0	0	6788.61	0	0	0	7.92153	0	6.32556	0.304432	0	0
15	3.54709	0	0	0	0	0	0	0	0	0	0	0	0	0	0	0	0	0	0	0	0	0	0	0	0	0	0	0	0	0	0	0	0	0	88.1394	0	170.539	0	0	16559.8	0	0	0	23.3744	0	0.178779	0	0	0
16	3.80045	0	0	0	0	0	0	0	0	0	0	0	0	0	0	0	0	0	0	0	0	0	0	0	0	0	0	0	0	0	0	0	0	0	274.918	0	91.8107	0	0	9821.49	0	0	0	31.313	0	5.92478	0	0	0
17	4.05382	0	0	0	0	0	0	0	0	0	0	0	0	0	0	0	0	0	0	0	0	0	0	0	0	0	0	0	0	0	0	0	0	0	291.229	0	232.76	0	0	3490.37	0	0	0	1.7704	0.0652777	16.8048	0	74.0784	0
18	4.30718	0	0	0	0	0	0	0	0	0	0	0	0	0	0	0	0	0	0	0	0	0	0	0	0	0	0	0	23211.4	0	0	0	0	0	329.07	0	135.242	0	0	148.868	0	0	12.6211	32.5936	0	0.217731	0	617.791	0
19	4.56055	0	0	0	0	0	0	0	0	0	0	0	0	0	0	0	0	0	0	0	0	0	0	0	0	0	0	0	0	0	0	0	0	0	831.833	0	247.409	0	0	4066.38	0	0	0	49.4295	0	22.4865	0.0177492	5.4206	0
20	4.81391	0	0	0.00760567	0	0	0	0	0	0	0	0	0	0	0	0.594884	0	0	0	0	0	0	0	0	0	0	0	0	2.95991	0	0	0	0	0	1960.82	0	596.625	13477.5	0	8010.8	0	0	0	4.89356	0	1.50199	0.0130405	950.064	0
21	5.06727	0	0	0	0	0	0	0	0	0	6.177	0	0	0	0	2.8996	0	0	0	0	0	0	0	0	0	0	0	0	16.1823	0	0	0	0.0518859	0	1184.98	0	3156.03	958.051	0	6371.75	0	0	0	11.7169	0	20.3456	0	987.192	0
22	5.32064	0	0	0	0	0	0	0	0	0	0	0	0	0	0	0	0	0	0	0	0	0.334211	0	0	0	0	0	0	0	0	0	0	0.0965411	0	913.366	0	698.119	0.000556512	0	34.7914	0	0	0	140.111	0	3.98254	0	0	0
23	5.574	0	0	0	0	0	0	0	0	0	3.08345	0	0	0	0	0	0	0	0	0	0	0.246744	0	0	0	0	0	0	4055.88	0	0	0	0	0	808.2	4.06285	579.667	0	0	1141.75	0	0	0	120.732	0	19.8273	0	0.00573089	0
24	5.82736	0	0	0	0	0	0	0	0	0	0	0	0	0	0	0	0	0	0	0	0	0	0	0	0	0	0	0	0.182406	0	0	0	0	0	1521.6	0	1808.13	1227.93	0	1317.64	0	0	7.42664	437.33	0	0	0.486352	19.6471	0
25	6.08073	0	0	0	0	0	0	0	0	0	35.3833	0	0	0	0	0	0	0	0	0	0	0	0	0	0	0	0	0	0	0	0	0	0	0	1833.2	0	1180.09	10105.2	0	11668.7	0	0	0	3.61641	0	8.77851	1.79086	22.5311	0
26	6.33409	0	0	0	0	0	0	0	0	0	0	0	0	0	0	0	0	0	0	0	0	0	0	2.03142	0	0	0	0	0	0	0	0	0	0	4409.25	0	621.204	78.7394	0	9717.63	0	0	0	4.88853	0	7.48778	0	7417.23	0
27	6.58745	0	0	0	0	0	0	0	0	0	0.808407	0	0	0	0	1.16231	0	0	0	0	0	0	0	0	0	0	0	0	0	0	0	0	0	0	3346.01	0	2563.8	1377.34	0	10841.4	0	0	0	311.545	0	40.9819	0	0.295709	0
28	6.84082	0	0	0	0	0	0	0	0	0	0	0	0	0	0	0	0	0	0	0	0	1.9288	0	0	0	0	0	0	0	0	0	0	0	0	2751.11	0	1914.1	1705.62	440.662	4293.22	0	0	0	125.914	2.37855	0.139973	0.19249	0	0
29	7.09418	0	0	0.0031812	0	0	0	0	58.6806	0	37.5884	0	0	0	0	0	0	0	0	0	0	1.89884	0	0	0	0	0	0	275.772	0	0	0	0	0	2886.2	0	4158.94	344.92	0	20061.3	0	0	196.885	519.611	0	27.2051	0	246.665	0
30	7.34755	0	0	0	0	0	0	0	0	0	82.0624	0	0	0	0	0	0	0	0	0	0	0.764427	0	0.0325974	0	0	0	0	19.2726	0	0	0	0	0	11594	0	4752.21	1718.35	0	7222.17	0	0	0	144.078	0	10.459	412.932	67.5882	0
31	7.60091	0	0	0	0	0	0	0	2.82462	0	16.3897	0	0	0	0	0	0	0	0	0	0	5.04582	0	0	0	0	0	0	0	0	0	0.40629	0	0	12406.9	0	4516.49	408.295	0	7828.64	0	0.735717	77.2465	87.519	0	738.845	0	342.451	0
32	7.85427	0	0	0	0	0	0	0	0	0	6.55499	0.0311331	0	0	0	0	0	0	0	0	0	0.321988	0	0	0	0	0	0.347666	0	0	0	0	0	0	13212	0	12842.4	4364.16	0	18091.9	0	0	0	17.3326	390.992	1461.63	52.1449	488.134	0
33	8.10764	0	0	0	0	0	0	0	28.9377	0	52.9117	0	0	0	0	0.560436	0	0	0	0	0	9.91003	0	0.00158271	0	0	0	0.362428	0	0	0	0	0	0	8220.07	0	5546.63	3402.94	0	630.868	0	0	75.7158	96.9473	731.3	1.20309	98.0484	8.98151	0
34	8.361	0	0	0	0	0	0	0	86.9494	0	15.3826	0	0	0	0	15.1227	0	0	0	0	0	0	0	0	0	0	0	0	1869.37	0	0	0	0	0	16722.2	0	2497.59	163.135	0	689.831	0	3.26518	129.952	308.86	1.97272	0	0	175.802	0
35	8.61436	0	0	0.132971	0	0	0	0	0	0	0	0	0	0	0	33.9217	0	0	0	0	0	0.151162	0	0	0	0	0	0	296.965	0	0	0	0	0	7210.97	0	4423.64	270.415	0	391.359	0	55.6514	2136.1	141.043	32.3503	3194.03	7.2516	212.759	0
36	8.86773	0	0	0.0187714	0	0	0	0	0	0	1601.77	0	0	0	0	0	0	0	0	0	0	3.5544	0	3.01728	0	0	0	0	1267.06	0	0	0	0	0	11373.4	0	8554.86	2943.52	0	40749.6	0	0.0356602	183.533	60.2886	0.980981	17.7721	3.35756	907.673	0
37	9.12109	0	0	0.000517043	0	0	0	0	0	0	118.855	0	0	0	0	0	0	0	0	0	0	10.8012	0	23.851	0	0	0	0	21.5955	0	0	0	0	0	22683.8	0	2421.8	1512.37	0	4165.16	0	14.4967	103.357	437.351	0	4.35882	0	667.634	0
38	9.37445	0	0	0	0	0	0	0	0	0	10.1308	0	0	0	0	0	0	0	0	0	0	0	0	10.0302	0	0.195139	0	0	2727.32	0	0	0	0	0	33385.7	0	6907.42	228.064	0	38063.3	0	349.847	193.726	350.966	496.87	84.3059	453.996	528.25	0
39	9.62782	0	0	0	0	0	0	0	0	0	24.0719	0	0	0	0	83.1284	0	0	0	0	0	1.16301	0	9.49563	0	0	0	0	0	0	0	0	0	0	19686.2	0.407533	2049.16	2180.35	0	26743.9	0	2932.29	39.8215	46.4539	66.788	122.608	0.587192	296.415	0
40	9.88118	0	0	0.00118012	0	0	0	0	214.434	0	68.0323	0	0	0	0	474.385	0	0	0	0	0	0	0	57.4022	0	0	0	0	403.118	0	0	0	0	0	20228.1	0	8628.37	0	473.265	6728.7	0	1197.42	78.6916	248.373	381.04	6.47746	0.860364	586.429	0
41	10.1345	0	0	0	0	0	0	0	0	0	253.867	0	0	0	0	81.1102	0	0	0	0	0	7.67599	0	0	0	0	0	0	415.914	0	0	0	0	0	18584.9	0	3111.31	404.951	0	2074.92	0	2420.91	896.531	116.016	69.734	0	0.439957	2006	0
42	10.3879	0	0	0	0	0	0	0	203.255	0	71.6505	0	0	0	0	0	0	0	0	0	0	3.92549	0	22.5525	0	0	0	39.2155	3.46571	0	0	0	0	0	4581.31	0	7679.38	176.187	0	10155.9	0	4733.42	74.488	82.7892	300.189	951.764	0	168.997	0
43	10.6413	0	0	5.27815	0	0	0	0	18.3083	0	103.502	0	0	0	0	114.016	0	0	0	0	0	0	0	0.0181636	0	0	0	0	401.38	0	0	0	0	0	14144.9	0	519.149	2004.91	0	16277.8	0	2578.94	78.3766	90.3345	445.31	0	95.4692	191.476	0
44	10.8946	0	0	0	0	0	0	0	3.01693	0	40.7253	0	0	0	0	289.423	0	0	0	0	0	4.36012	0	7.62388	0	0	0	0	979.027	0	0	1.36081	15.2401	0	25502.7	0	19271.8	189.795	0	3093.19	0	2986.19	442.376	856.17	1099.1	3851.07	0	297.804	0
45	11.148	0	65.9314	0	0	0	0	0	143.119	0	173.397	55.4649	0	0	0	371.115	0	0	0	0	0	3.39574	0	82.7371	0	0	0	0	0.589923	0	0	0.471686	0	0	14252	0	3917.92	1906.41	0	18285.5	0	6408.77	2166.71	75.3768	1.97154	1939.47	0	4.02945	0
46	11.4014	0	0	0	0	0	0	0	0	0	3.25916	0	0	0	0	308.68	0	0	0	0	0	0.354321	0	37.9295	0	0	0	0	0	0	0	0.733546	0	0	19902.5	0	5331.78	1158.88	152.462	8577	0	790.213	485.919	77.7343	0	0	0	1845.15	0
47	11.6547	0	0	0.00844241	0	0	0	0	81.9296	0	29.8945	0	0	0	0	237.373	0	0	0	0	0	0	0	35.0809	0	1.03149	0	45.6396	295.017	0	0	1.71715	0	0	16201.7	0	37411.4	578.665	0	5966.49	0	170.194	648.214	59.8306	0	2070.94	0.57009	1343.14	339.806
48	11.9081	0	0	0	0	0	0	0	1.06431	0	32.1414	0	0	0	0	211.45	0	0	0	0	0	0	0	0	0	0	0	65.024	2000.13	0	0	26.2068	1.05544	0	22775.2	0	3563.7	125.701	0	7856.79	0	0	8.14407	11.9465	0	517.826	0.782954	54.2347	0
49	12.1615	0	0	0	0	0	0	0	7.29075	0	372.103	0	0	0	0	80.7029	0	0	0	0	0	13.8258	0	1.33396	0	0	0	114.594	0	0	0	0	0	0	11020.5	0	8493.31	228.694	0	23022	0	3415.1	314.98	194.361	354.667	1344.66	0	16.5343	0
50	12.4148	0	0	0	0	0	0	0	0.599778	0	124.041	0	0	0	0	0	0	0	0	0	0	13.769	0	1.55835	0	0	0	0	2288.05	0	0	0	0	0	13638.9	0	9052.34	0	0	1696.22	0	1697.99	95.0689	9.3838	287.488	370.289	0	877.558	0
51	12.6682	0	0	0	0	0	0	0	35.3118	0	51.8198	0.4141	0	0	0	407.783	0	0	0	0	0	1.51407	0	8.26429	0	0	0	0	0	0	0	31.3712	0	0	12599.6	0	7035.66	716.844	0	512.336	0	1825.83	176.963	271.46	9.81236	28.2766	0	1339.95	0
52	12.9215	0	0	0	0.426438	0	0	0	1.77137	0	329.904	0.29063	0	0	0	348.354	0	0	0	0	0	8.57043	0	5.92434	0	0	0	0	0	0	0	0	0	0	29257.4	0	3505.92	108.24	0	1179.26	0	1316.04	147.881	26.6943	65.6744	1881.48	0	171.176	0
53	13.1749	0	0	0	0	0.729244	0	0	198.468	0	200.581	0	0	0	0	44.3077	0	0	0	0	0	48.0509	0	2.74319	0	0	0	0	33.1671	0	0	0	0	0	16335.1	0	398.507	0	0	4393.09	0	2459.5	287.069	633.147	8.1431	150.554	0	360.342	0
54	13.4283	0	0	2.77076	0	0	0	0	15.8585	0	6.47325	0.292011	0	0	0	1326.67	0	0	0	0	0	20.0429	0	158.596	0	0	0	0	0	0	0	0	0	0	20633.7	0	5752.88	5424.1	0	5520.07	0	1964.02	903.4	34.4235	39.929	305.222	15.787	1554.59	0
55	13.6816	0	0	0	0	0	0	0	75.4768	0	30.9304	0.0544159	0	0	0	82.812	0	0	0	0	0	0	0	22.6869	0	4.34357	0	0	20.7423	0	0	0	0	0	6978.76	0	5195.6	1031.75	0	391.231	0	219.498	421.743	232.304	12.0428	133.215	0	500.457	0
56	13.935	0	0	0	0	0	0	0	51.2191	0	19.1578	0.261533	0	0	0	42.9904	0	0	0	0	0	58.9775	0	0.199105	0	0	0	22.8605	0	0	0	0	8.15265	0	13128.4	0	3781.51	357.42	287.104	89.0353	0	1000.27	83.8442	601.4	395.043	45.1558	0.691413	183.855	0
57	14.1884	0	0	0	0	0	0	0	36.1451	0	0	0.608126	0	0	0	78.9695	0	0	0	0	0	28.6997	0	0.794388	0	0.378847	0	0	0	0	0	0	0.51048	0	7201.27	0	2816.34	499.838	0	5442.8	0	111.933	43.6667	10.7533	103.86	0	0	6.70239	0
58	14.4417	5.89546	0	0	0	23.6164	0	0	125.533	0	5.63139	0	0	0	0	821.419	0	0	0	0	0	0.310913	0	3.29602	0	0	0	0	392.064	0	0	0	0	0	6559.32	0	2677.47	296.897	2.06661	2525.94	0	346.788	295.32	97.5917	53.6723	1644.24	0	1381.8	0
59	14.6951	0	0	0	0	0	0	0	0.732374	0	17.3259	0	0	0	0	188.414	0	0	0	0	0	30.42	0	80.9144	0	0	0	496.618	29.142	0	0	0	0	0	21068.8	0	6306	162.218	0	26637.6	0	626.267	593.446	64.0745	99.585	515.423	40.4206	52.5753	0
60	14.9485	0	0	0	0	0	0	0	0	0	3.43864	0.275797	0	0	18.8244	0	0	0	0	0	0	0.980512	0	7.0688	0	0	0	0	64.6045	0	0	1.94699	6.25162	0	20993.3	0	581.966	2920.29	136.914	1933.01	0	710.775	251.542	31.0702	186.495	29.2092	61.0151	2893.31	0
61	15.2018	0	0	17.0297	0	0	0	0	0.130682	0	10.5014	0	0	0	0	134.908	0	0	0	0	0	5.54352	0	6.11881	0	0.397883	0	0	1774.31	0	0	0	0	0	16087.4	0	5024.14	137.14	24.0489	968.543	0	691.148	229.181	0.47913	14.4119	3109.98	0	3693.21	0
62	15.4552	0	0	0	0	0	0	0	374.019	0	1.00799	0	0	0	0	147.917	0	0	0	0	0	2.0367	0	14.5031	0	0	0	0	437.331	0	0	0	1.51155	0	13372	0	1189.76	1780.92	0.00304306	150.161	0	3510.82	195.65	14.8265	284.697	4646.32	2.66421	55.4021	0
63	15.7085	0	0	19.6361	0	0	0	0	0	0	0	0	0	0	0	144.107	0	0	0	0	0	0	0	0.484513	0	0	0	0	1514.42	0	0	249.559	0	0	4678.54	0	781.301	4417.7	4.5172	13041.8	0	1209.59	120.523	1677.45	129.88	903.364	2.21921	301.725	0
64	15.9619	0	0	0	0	0	0	0	47.7022	0	38.9097	0	0	0	0	307.584	0	0	0	0	0	0.770892	0	10.4457	0	0.695451	0	7.86152	157.83	0	0	0	0	0	1453.26	0	3637.69	2158.5	3.56988	19958.9	0	196.638	8.87323	77.1775	0	161.028	1.58255	8.85361	0
65	16.2153	0	0	0	0	0	0	0	0	0	12.3913	0	0	0	0	72.6976	0	0	0	0	0	0	0	14.0985	0	0	0	0	0	0	0	35.9253	0	0	34318.3	0	578.392	2147.65	2.58483	1199.45	0	0	173.578	3.72627	494.11	438.215	0.0315673	1265.44	0
66	16.4686	0	0	0.429099	0	0	0	0	0	0	4.38199	0	0	0	0	178.968	0	0	0	0	0	0.853686	0	0	0	0	0	23.6291	638.55	0	0	0	0	0	11598.1	0	508.51	3.46435	28.4889	3691.66	0	195.08	0	636.925	6.65247	625.507	27.8415	34.8792	0
67	16.722	0	0	8.26096	0	0	0	0	44.6499	0	40.0306	0	0	0	0	0	0	0	0	0	0	0	0	97.8276	0	0	0	15.6492	108.607	0	0	0	0	0	15307.5	0	5610.95	91.0064	0	735.432	0	0.465517	124.739	11.6587	339.64	118.58	0	15.0352	0
68	16.9754	0	0	0	0	0	0	0	0	0	0	0.831078	0	0	0	4.30827	0	0	0	0	0	0	0	8.25353	0	0	0	130.204	44.4167	0	0	0	47.9207	0	8029.91	34.1376	738.908	160.458	0	2483.67	0	241.065	165.127	203.512	393.546	85.0464	35.3036	0	0
69	17.2287	0	0	0	0	0	0	0	41.2552	0	16.1736	0	0	0	0	38.2273	0	0	0	0	0	0.0765777	0	19.3425	0	0	0	0	0	0	0	0	0	0	6447.89	11.6025	610.496	231.8	9.7225	5382.83	0	1124.06	306.8	92.5236	445.066	94.8406	36.5981	17.5295	0
70	17.4821	0	0	0	0	0	0	446.277	410.927	0	62.3548	0	0	0	0	553.383	0	0	0	0	0	9.82171	0	61.5296	0	0	0	0	212.812	0	0	0	0	0	20623.6	157.357	82.6679	348.102	0	13825.8	0	1958.46	142.347	20.3208	725.482	27.7322	25.8529	29.0286	0
71	17.7355	0	5.6999	0	0	0	0	0	0.513767	0	20.2182	0.21998	0	0	0	385.242	0	0	0	0	0	13.0715	0	23.8383	0	0	0	0	1256.46	0	0	0	7.57761	0	47885.7	0	129.752	216.439	0	89.407	0	9548.37	33.5726	182.213	44.0365	70.9339	1.54017	171.206	0
72	17.9888	0	64.6412	0	0	0	0	0	1.28935	0	64.4458	0.564154	0	0	0	376.737	0	0	0	0	0	0	0	176.459	0	0	0	0.895468	1971.08	0	0	0	33.7797	0	7463.56	0	3135.03	8145.69	0	5.73894	0	2993.01	39.0492	362.701	1573.96	70.076	0	19.5445	0
73	18.2422	0	0	1.10208	0	0	24.8814	0	4.01983	0	0	1.08864	0	0	0	37.0164	0	0	0	0	0	0	0	275.771	0	0	0	328.418	623.548	0	0	0	0	0	49418.2	0	1990.18	1030.88	0	161941	0	30680.1	339.138	4.17755	419.843	50.7935	3.19069	3.73668	0
74	18.4955	0	0	5.59001	0	0	0	0	60.6246	0	20.0584	0	0	0	0	379.195	0	0	0	0	0	59.3273	0	114.757	0	0	0	0	469.018	0	0	0	0	0	11452.1	0	10.2306	785.003	0	0	0	3989.51	194.703	44.8669	731.495	625.463	7.8452	66.1293	0
75	18.7489	0	42.236	0.339378	0	0	0	0	43.7259	0	0	2.48069	0	0	0	0	0	0	0	0	0	0	0	59.0986	0	0.946549	0	41.5745	6.01115	0	0	0	0	0	7335.56	0	92.4313	548.353	4.12516	2.13277	0	288.782	5.06765	84.7629	4438	144.358	66.7576	942.614	0
76	19.0023	0	82.3098	0	0	0	0	0	0	0	169.995	8.09021	0	0	0	11.7421	0	0	0	0	0	14.4978	0	4.60845	0	0	0	0	1.50579	0	0	0	0	0	703.905	0	76.5147	211.54	0	18.5712	0	8.14597	3.38695	12.7392	75.4451	0.182473	144.344	31.628	0
77	19.2556	0	5.63515	0.896759	0	0	0	0	3.11808	0	9.61784	7.33814	0	0	0	640.629	0	0	0	0	0	15.7183	0	9.3924	0	0.67338	0	11.3253	27.6901	0	0	3.52208	8.43304	0	1213.16	0	204.538	169.224	0	367.454	0	1493.33	62.3998	50.2087	421.928	4.74997	4.8262	89.1126	0
78	19.509	0	0	0	0	0	0	0	0	0	1.80514	5.87456	0	0	0	209.338	0	0	0	0	0	0	0	2.06982	0	0	0	0	0	0	0	0	0	0	14509.5	0	358.416	186.246	0	9636.84	0	1388.38	320.866	106.854	1026.13	287.196	202.868	24.5291	0
79	19.7624	0	0	3.5379	0	0	0	0	33.4144	0	10.4153	0	0	0	0	85.6816	0	0	0	0	0	0.0971686	0	86.3949	0	0	0	0	785.916	0	0	0	0	0	21464.3	0	34.0833	1466.12	0	10786.3	0	603.116	1592.99	155.173	174.595	0	109.302	85.2777	0
80	20.0157	0	81.269	0.675776	0	0	0	0	11.4753	0	25.6732	0	0	0	0	25.524	0	0	0	0	0	0.0852806	0	179.469	0	0	0	0	396.083	0	0	0	8.40641	0	15520.1	0	5.82199	2250.77	7.51744	29.8514	0	6719.85	1077.77	5.80827	898.568	10.105	4.18497	35.5044	0
81	20.2691	0	140.878	461.499	0	0	0	0	0.320914	0	0	0	0	0	0	458.09	0	0	0	0	0	0.137017	0	10.7753	19.4097	0	0	120.481	36.037	0	0	0	0	0	1799.89	0	16313.9	3107.65	0	237.93	0	15399.1	58.8625	243.786	1780.39	34.8207	41.7576	971.14	0
82	20.5225	0	707.855	0	0	0	0	0	12.838	0	158.498	4.2123	0	0	0	108.47	0	0	0	0	0	0	0	2.29837	0	0	0	3.42593	1917.16	0	0	0	0	0	10156	0	1091.03	1363.77	6.23918	281.169	0	736.072	13.6973	88.6513	612.928	1.45262	40.9191	428.356	0
83	20.7758	0	10.7625	1.78556	0	0	0	0	72.5156	0	0.612314	0	0	0	0	229.933	0	0	0	0	0	0	0	13.1172	0	0	0	6.89073	113.497	0	0	0	0	0	22955.8	0	14.9386	537.376	1.59631	145.771	0	606.625	30.257	2776.05	1967.12	12.73	0	0	0
84	21.0292	0	102.294	0	0	0	0	0	0	0	0	0.27219	0	0	0	195.803	0	0	0	0	0	0	0	14.7018	88.5175	0	0	0	19.4989	0	0	0	0	0	628.963	0	693.848	2371.66	0	2877.8	0	225.107	97.4821	173.14	360.028	337.701	1.58164	0	0
85	21.2825	0	258.408	33.991	0	0	0	0	202.994	0	4.98308	1.24536	0	0	0	126.481	0	0	0	0	0	0	0	0.792383	0	0	0	3.50448	33.9884	0	0	0	0	0	2852.7	0	94.3401	0.403432	0	2221.41	0	22.9682	248.636	9.16028	576.498	120.303	0	241.031	0
86	21.5359	0	0	0.143075	0	0	0	0	21.7761	0	0	0	0	0	0	558.96	0	0	2476.43	0	0	0	0	30.032	0	0	0	0	487.003	0	0	0	0	0	2756.08	0	6942.53	651.025	0	35628.6	0	7806.77	45.9763	141.067	3348.17	291.822	2.56364	34.9008	0
87	21.7893	0	0	0.437075	0	0	0	0	0	0	43.7992	0.0747897	0	0	0	37.1445	0	0	0	0	0	0	0	5.37714	0	0	0	683.591	8.0011	0	0	0	5.94215	0	31225.5	0	3792.17	278.6	10.3591	135.369	0	820.225	173.301	3.03891	696.505	87.4921	0	27.1283	0
88	22.0426	0	0	17.0606	0	0	0	0	0	0	0	0	0	0	0	18.6501	0	0	0	0	0	0	0	8.14591	0	0	0	114.684	404.299	0	0	6.15056	0	0	7324.97	0	282.019	4087.98	0	315.905	0	159.447	59.942	187.488	1496.07	66.2619	5.54854	82.7999	0
89	22.296	0	0	1.33886	0	0	0	0	17.1272	0	79.6292	6.9182	0	0	0	53.4985	0	0	0	0	0	0.0502321	0	16.1902	0	0	0	59.1316	183.68	0	0	0	0	0	11571	0	182.872	1220.38	33.2803	6860.7	0	194.546	40.5181	66.1201	1983.02	160.487	6.39487	0	0
90	22.5494	0	24.3394	0.393064	0	0	0	0	256.499	0	0.241522	0	0	0	0	601.386	0	0	0	0	0	0	0	9.52531	0	0	0	19.7767	383.517	0	0	0	0	0	18510.7	0	4024.13	1797.73	0	549.349	0	606.373	709.287	14.0368	1889.31	177.316	4.22689	57.741	0
91	22.8027	0	43.917	0	0	0	0	33.641	7.96905	0	0	0.188796	0	0	0	93.9445	0	0	0	0	0	0	0	14.252	0	0	0	5.34192	31.6654	0	0	0	0	0	142.281	3.69182	436.215	2293.2	153.532	472.73	0	19164.8	399.801	93.6509	605.822	53.4561	9.6892	0	0
92	23.0561	0	0	246.208	0	0	0	0	3.43695	0	0	0	0	0	0	451.119	0	0	0	0	0	0	0	1.30529	0	0	0	24.476	7.90405	0	0	0	0	0	15301.3	105.975	779.264	25.6817	0	167.027	0	98.8757	8.42845	0.413757	517.11	92.7618	8.96966	59.5646	0
93	23.3095	0	0	32.6734	0	0	0	0	51.0102	0	6.04654	158.442	0	0	0	328.175	0	0	0	0	0	0	0	22.1318	0	0	0	0	126.668	0	0	0	0	0	616.784	31.0994	137.678	910.921	0	103.026	0	9251.14	61.9382	74.3386	408.492	111.584	2.43568	435.535	0
94	23.5628	0	0	35.1215	0	0	0	0	0	0	0	0	0	0	0	2438.87	0.0755396	0	0	0	0	0.980851	0	5.90436	0	0	0	8.28807	153.889	0	0	0	0	0	18481.1	0	139.438	953.179	0	132.598	0	734.591	243.547	0	229.716	211.724	20.6901	531.912	0
95	23.8162	0	14.8603	7.18887	0	0	0	0	17.4265	0	63.766	0.541487	0	0	0	103.144	0	0	2622.61	0	0	20.3658	0	0	0	0	0	0	406.771	0	0	0	0	0	21302.3	0	191.914	2943.43	82.0879	12253.2	0	870.553	0.0153613	16.4509	543.783	332.341	90.6353	25.0041	0
96	24.0695	0	0	13.8581	0	0	0	0	0	0	339.001	0	0	0	0	95.9073	0	0	0	0	0	0	0	0	0	0	0	19.5937	853.478	0	0	0	0	0	1517.87	0	576.93	79.7491	0	305.971	0	4280.45	164.702	20.2454	520.146	1.08764	8.45621	1.47263	0
97	24.3229	0	0	0	0	0	0	0	0	0	0	0	0	0	0	296.987	0	0	0	0	0	0.0249128	0	0.778158	0	0	0	0	545.74	0	0	0	0	0	1711.47	0	17328.9	256.74	0	3469.85	0	9046.36	4.59387	15.507	604.607	260.991	0	1038.63	0
98	24.5763	0	0	140.194	0	0	0	0	0.374114	0	173.181	0	0	0	0	415.367	0	0	0	0	0	0	0	0.266352	0	0	0	84.6648	529.827	0	0	0	0	0	854.99	0	85.2125	5078.23	0	25685.3	0	7870.27	17.2272	0	327.932	0	15.4141	15.4902	0
99	24.8296	0	24.1509	34.9	0	0	0	0	0	0	12.1381	0.560432	0	0	0	45.5674	0	0	0	0	0	0	0	0	0	6.94745	0	264.912	1358.72	0	0	0	0	0	6672.62	0	1206.26	2670.86	12.4502	118.453	0	318.842	267.824	966.444	723.036	4.67284	25.3516	0.00875422	0
100	25.083	0	0	0	0	0	0.0194187	0	13.1868	0	5.29017	1.52388	0	0	0	252.355	0	0	0	0	0	6.95502	0	0.391769	0	0	0	60.0651	719.135	0	0	0	145.778	0	4358.7	0	71.1547	2276.78	0	357.412	0	532.746	36.1013	295.529	270.66	118.162	3.53652	20.5816	0
101	25.3364	0	10.8974	0	0	0	37.5125	0	0	0	114.324	0	0	0	0	115.411	0	0	0	0	0	0	0	104.47	0	0	0	448.732	122.089	0	0	0	0	0	10654	0	566.82	2207.1	654.724	13.9199	31.4845	15230.3	42.9567	180.376	588.123	31.9641	1.08554	0	0
102	25.5897	0	0	53.2864	0	0	6.19224	0	0.155863	0	12.2468	0.219961	0	0	0	670.063	0.406274	0	0	0	0	1.64327	0	8.90392	0	0	0	510.82	382.66	0	0	0	12.2639	0	1680.97	0	500.298	2914.45	0	4046.74	0	217.626	39.2772	230.787	329.584	0.94568	166.42	197.119	0
103	25.8431	0	10.8293	1.24047	0	0	0	0	0	0	14.5394	0	0	0	0	14.3252	0	0	0	0	0	0.41742	0	2.03359	0	0	0	0	290.251	0	0	0.496421	0.326598	0	17264.7	34.9014	1165.98	38.8644	0	51734.8	32.3369	229.152	32.1567	332.264	609.536	139.28	0.740252	0	0
104	26.0965	0	0	63.1799	0	0	0	0	0	0	37.5726	0	0	0	0	471.771	0	0	0	0	0	5.87342	0	106.05	0	0	0	16.9424	58.3618	0	0	2.25304	0	0	564.564	0	81.2932	2244.16	0	142.587	0	1785.43	10.7711	434.521	370.454	18.4303	0	64.5299	0
105	26.3498	0	0	187.185	0	0	0	0	83.9578	0	240.232	12.1746	0	0	0	292.395	0	0	0	0	0	26.528	0	20.2562	0	0	0	523.742	696.206	0	0	59.5625	0	0	644.975	0	110.445	57.2014	1.44646	144.496	0	1344.95	498.665	266.008	347.049	125.071	74.9525	79.0178	0
106	26.6032	0	0	5.73582	0	0	13.3602	0	17.2177	0	58.3821	0	0	0	0	534.664	0	0	0	0	0	0	0	1.56324	0	0	0	14.557	343.639	0	0	0	0.445159	0	1579.73	0.999891	12.7761	1162.8	0	207.728	0	644.646	15.3019	177.213	644.261	609.61	4.91967	0	0
107	26.8565	0	0	32.7521	0	0	0	0	0.11933	0	50.103	0	0	0	0	1102.55	0	0	0	0	0	0.091868	0	0.0770276	0	0	0	0	98.9581	0	0	0	0	0	922.419	0	107.774	72.9263	0	10.7694	0	3626.95	470.776	168.067	251.098	236.51	0.855754	2147.39	0
108	27.1099	0	38.5499	223.738	0	0	0	0	24.2517	0	202.879	0	0	0	0	186.898	0.0143391	0	0	0	106.076	4.70597	0	145.93	0	0	1.5484	24.7638	437.444	0	0	45.2714	0	0	2586.49	0	7155.17	2305.16	0.00114065	142.884	0	1197.24	117.765	366.155	266.805	19.4823	6.35543	0.708942	0
109	27.3633	0	0	34.1155	0	0	0	0	1.03542	0	0	3.85114	0	0	0	306.304	0	0	2604.78	0	0	0	0	3.26921	0	0	0	6.63473	66.4276	0	0	1.57125	0.857199	0	2879.02	0	20.8436	347.019	0	94.8109	0	436.446	31.7588	340.291	129.049	25.0299	0	4.74933	0
110	27.6166	0	49.9571	15.5397	0	0	0	783.433	3.9001	0	18.8439	0	0	0	0	234.634	0	0	0	0	0	0	0	0	0	0	0	2.68	201.277	0	0	0	11.285	0	903.46	0	1214.05	4348.94	0	204.073	0	413.738	86.7573	191.19	149.239	5.87615	1.43517	0	0
111	27.87	0	0	6.13234	0	0	7.57241	0	14.5572	0	9.63756	8.14918	0	0	0	1284.84	0	0	0	0	0	0	0	6.06528	0	0	0	62.623	210.005	0	0	0	2.99633	0	828.158	0	27.9784	1359.43	4.92371	44.1087	0	2026.63	351.856	321.383	43.0799	132.14	0	0	0
112	28.1234	0	0	9.2996	0	0	0	0	0	0	42.6507	0	0	0	0	399.786	0	0	0	0	0	0	0	6.7412	0	0.232366	0	0	101.457	0	0	11.1303	0.433819	0	407.815	0	238.111	3849.95	1.93144	4867.99	0	343.137	158.542	515.062	80.285	13.3141	2.00412	0	0
113	28.3767	0	22.9873	278.653	0	0	0	0	176.796	0	146.466	0.876933	0	0	0	424.98	0	0	0	0	0	1.22594	0	4.32354	0	0	0	233.634	326.169	0	0	0	0	0	604.007	0	186.517	349.44	0	86269.2	70.1057	433.441	181.955	500.678	408.007	59.7742	0.611398	318.324	0
114	28.6301	0	0	46.3009	0	0	0	0	5.16993	0	23.6605	0.313818	0	0	0	5056.34	0	0	0	0	0	0	0	51.9086	0	0	0	0	466.554	0	0	0	56.7603	0	3063.04	0	305.237	1783.44	0	111.739	0	188.259	785.156	41.5391	79.8573	23.793	4.25321	912.052	0
115	28.8835	0	0	5.64786	0	0	0	0	0	0	17.8507	0	0	0	0	1353.69	0	0	0	0	0	0.518022	0	1.09085	0	0	0	0	467.908	0	0	0	0.224535	0	3401.01	0	232.907	116.589	4.70296	60.8053	0	484.127	131.597	302.895	129.221	50.2054	0	298.804	0
116	29.1368	0	0	39.8053	0	0	0	0	0	0	112.533	0	0	0	0	100.356	0	0	0	0	0	0	0	395.58	0	0	0	2.92668	64.695	0	0	0	3.08638	0	945.964	0	139.936	342.625	3.14519	5927.33	0	1435.44	99.6822	347.212	413.041	50.3921	0	0	0
117	29.3902	0	38.4851	77.0551	0	0	0	0	0	0	149.714	0	0	0	0	11513.6	0	0	0	0	0	0	0	0.457445	0	0	0	0	365.93	0	0	0	0.847122	0	2249.46	0	274.545	714.741	0	320.775	0	570.657	26.2335	79.4127	347.141	18.4044	0	0	0
118	29.6435	0	22.1076	124.966	0	0	0	0	0.204161	0	193.404	0.506213	0	0	0	37.7171	0	0	0	0	0	9.12653	0	6.38002	0	0	0	0	421.132	0	0	0	0	0	1256.12	0	6.7451	184.804	0	3.42743	0	1481.1	1.61381	397.939	239.77	28.6859	1.85492	679.258	0
119	29.8969	0	20.4327	63.2659	0	0	0	0	2.82312	0	8.96925	0	0	0	0	967.248	0	0	0	0	0	40.9704	0	13.7816	0	0	10.9044	24.5353	141.947	0	0	25.5304	1.57351	0	3303.51	0	2055.49	154.879	0	100.367	0	1563.92	19.3308	252.925	215.927	44.8919	2.3285	0	0
120	30.1503	0	1.01949	15.2061	0	0	0	0	0	0	48.9787	0.0311292	0	0	0	124.577	0	0	0	0	0	0	0	48.8042	0	0	0	0.0763685	387.169	0	0	8.57791	8.80282	0	215.826	0	11.4418	143.421	1.64556	165.318	0	22.9355	0	68.1706	145.583	46.1166	0	0.00193003	0
121	30.4036	0	46.4814	27.0473	0	0	0	0	117.762	0	64.204	50.3991	0	0	0	78.352	0	0	0	0	0	4.95032	0	7.82505	0	0	0	0	113.847	0	0	0	1.65807	0	889.91	0	199.14	73.267	4.44711	86.5161	0	892.802	0.689235	328.436	202.674	34.8991	0	157.972	0
122	30.657	0	46.6974	1.62794	0	0	0	154.799	0	0	371.703	1.30169	0	0	0	78.3142	0	0	0	0	0	0	0	2.65797	0	0	0	3.16932	135.162	0	0	0	0.956171	0	6295.59	0	53.7535	56.3332	541.364	60.5241	0	621.415	16.6949	28.4334	3082	36.7074	0	280.254	0
123	30.9104	0	12.4222	7.96014	0	0	0	0	0.804831	0	4.16164	0	0	0	0	292.906	0	0	0	0	0	0	0	3.43597	0	6.19954	0	33.1992	218.945	0	0	0.965071	135.947	0	1863.28	0	206.291	4.51237	11.0667	2508.66	0	168.856	51.5458	444.277	122.753	7.67865	0	196.536	0
124	31.1637	0	0	5.74722	0	0	0	0	2.45788	0	38.0745	0.29282	0	0	0	66.6323	0	0	0	0	0	0	0	1.31277	0	0	0	12.3514	261.035	0	0	7.52113	75.0277	0	4878.35	0	99.7115	479.262	0	38.5864	0	102.335	247.426	0	22.4356	4.70614	2.28922	0	0
125	31.4171	0	63.2902	69.1382	0.527601	0	1013.31	0	4.47593	0	6.15564	1.59189	0	0	0	53.8494	0	0	0	0	0	0	0	0	0	0	0	11.3722	486.904	0	0	0	3.66865	0	765.924	0	28.711	1212.97	0	47.2401	0	443.755	3.58757	163.153	163.311	0.204374	0	236.663	0
126	31.6705	0	0	15.6506	0.0180097	0	0	0	0.875141	0	348.028	1.11344	0	0	0	223.601	0	0	0	0	0	1.02154	0	114.389	0	0	0	0	150.675	0	0	0	217.1	0	769.1	0	23.1185	322.305	40.9629	131.196	0	7264.1	56.5457	131.704	73.5799	600.491	0	126.296	0
127	31.9238	0	8.15756	16.7399	0	0	17.9804	0	36.3577	0	89.2132	0	0	0	0	37.8213	0	0	0	0	0	3.43888	0	73.7037	0	0	0	7.91071	177.751	0	0	0	3.10713	0	2185.93	0	4.08233	215.482	48.7194	0	0	249.033	46.3078	1.32803	182.486	7.58934	0	0	0
128	32.1772	0	7.01311	20.6557	0	0	0	0	9.87243	0	38.7666	2.94515	0	0	0	183.978	0	0	0	0	0	0	0	160.012	0	0	0	0	99.8982	0	0	0	0.709435	0	878.836	0	90.8778	628.475	0	258.09	0	485.082	0	8.75866	0	69.4682	0	1.78828	0
129	32.4305	0	177.078	5.47373	0	0	0	3.96272	7.0564	0	188.672	1.19897	0	0	0	29.3167	36.322	0	0	0	0	3.26531	0	0	0	0	0	2.63228	107.799	0	0	0	0.449875	0	1148.47	0	18.1458	3269.89	20.1733	66.4802	0	708.407	31.1036	27.9967	3.82044	40.1079	31.6018	67.6048	0
130	32.6839	0	0	0	0	0	0	0	1.89823	0	50.3702	0	0	0	0	7.2568	0	0	0	0	0	0.576673	0	2.35662	0	0.0871317	0.598847	11.2623	53.1513	0	0	0	0.733914	0	436.429	0	25.1498	373.663	0	0	0	943.664	97.983	0	20.3589	29.4016	0	173.915	0
131	32.9373	0	27.5442	30.8449	0	0	0	3.72722	42.5231	0	2.23526	3.25832	0	0	0	139.395	0	0	0	0	0	0	0	3.76445	0	0	0	0	334.079	0	0	0	290.199	0	1082.29	0	77.6151	118.753	39.6965	1322.34	0	211.065	3.1696	370.498	791.493	56.135	0	102.333	0
132	33.1906	0	40.8751	8.71839	0	0	11.1612	0	2.48602	0	75.3275	0	0	0	0	54.723	0	0	0	0	0	0	0	2.48748	0	0	0	9.90701	142.62	0	0	0	0.936745	0	3194.49	0	7.6881	272.219	0	60.4618	0	124.109	40.8442	0	50.3422	0	2.15187	138.964	0
133	33.444	0	0	13.4745	0	0	0	0	1.7648	0	114.965	0.953235	0	0	0	39.705	0	0	0	0	0	0	0	145.905	0	0	0	222.612	198.125	0	0	0	1.60896	0	1336.87	0	90.5648	326.989	34.4354	249.041	0	331.453	8.15198	13.8824	77.1566	14064.9	0	0.778991	0
134	33.6974	0	231.608	38.9051	0	0	0	0	1.00767	0	100.724	0	0	0	0	189.909	0	0	0	0	0	0	0	23.5739	0	0	0	166.08	23.5895	0	0	0	109.933	0	867.987	0	17.5176	308.378	0.336303	32.3711	0	250.519	54.6037	473.284	32.9429	3386.6	0	654.738	0
135	33.9507	0	112.31	166.351	0	0	0	0	209.127	0	12.8375	0	0	0	0	242.886	0	0	0	0	0	9.0196	0	2.39617	0	0	0	2.73491	102.71	0	0	0	77.113	0	10.9791	0	21.7962	139.381	7.17159	121.122	0	17.5904	465.343	724.82	69.0132	15.5872	4.71443	28.3356	0
136	34.2041	0	22.0037	3.7436	0	0	0	0	10.9157	0	124.171	1.73517	0	0	0	65.5486	0	0	0	0	0	3.04271	0	4.89132	0	0	0	12.0995	175.161	0	0	0	0.955678	0	6903.96	0	529.695	281.986	6.03236	25.8879	0	2009.81	203.119	28.5337	150.895	2.54864	1.50293	40.3454	0
137	34.4575	0	2.20673	167.799	0	0	0	112.405	3.22722	0	7.35148	0	0	0	0	42.3698	0	0	0	0	0	0	0	0	0	0	103.888	0	68.9575	0	0	0	0.648736	0	1324.79	0	69.2863	118.114	120.797	14.4218	0	74.57	559.976	0	42.4924	0	0	273.711	0
138	34.7108	0	32.6156	5.56968	0	0	0	0	1.27971	0	153.74	0	0	0	0	101.939	0.220399	0	0	0	0	6.27239	0	2.37954	0	0	0	4.12729	97.7021	0.671576	0	0.891632	1.20267	0	666.336	0	24.3662	318.185	0	4386.94	0	4634.86	32.891	385.825	1.92753	0.0337894	3.6146	24.4588	0
139	34.9642	0	256.687	0.371612	0	0	0	0	8.38175	0	49.8062	0	0	0	0	235.092	0	0	0	0	0	0	0	5.33365	0	0	0	8.31836	115.2	0	0	0.167258	1.98439	0	585.028	0	4.9646	941.525	0	6877.74	0	408.344	184.536	37.1124	7.70823	0	4.90787	0	0
140	35.2175	0	0	2.80528	0	0	0	0	1.1295	0	0	0.611019	0	0	0	112.511	0	0	0	0	0	0	0	7.17299	0	0	0	3.48867	137.78	0	0	0	257.916	0	883.118	0	9.63331	321.906	0.736392	0	0	860.397	77.1934	0	35.7171	0.894785	0.120112	86.6128	0
141	35.4709	0	12.7244	23.2205	0	0	0	1.55048	0.654976	0	32.341	0	0	0	0	79.0708	0	0	0	0	0	1.44052	0	0	0	0	0	35.7314	51.683	0	0	0	0.426663	0	1630.72	0	1.12327	353.226	23.0105	90.2793	0	19.3743	0	164.034	0	0	0	291.261	0
142	35.7243	0	0	0	0	0	0	0	57.3123	0	95.6508	0	0	0	0	42.4506	29.9842	0	0	0	0	0	0	0	0	0	0	33.0604	74.0887	0	0	0	5.61558	0	2288.36	0	9.72208	389.729	0	3871.71	0	399.812	140.363	236.031	0	114.939	0.230586	0	0
143	35.9776	0	100.513	0	0.201035	0	0	0	164.631	0	128.711	0	0	0	0	146.153	0	0	0	0	0	0	0	57.85	0	45.2465	0	6.84086	64.3018	0	0	0	0	0	280.338	0	5.05191	188.785	0	5600.79	0	501.866	0	389.391	5.75738	10.6968	0	234.496	0
144	36.231	0	0	1.71544	0.00736096	0	0	6.60498	175.897	0	37.7921	0	0	0	0	73.4915	0	0	0	43.2489	0	0	0	0	0	81.4415	0	1.8427	152.881	0	0	0	0.841545	0	119.497	0	3.56407	657.938	0	27.0759	0	223.986	1345.59	27.5521	1615.21	0.0610861	1849.18	89.4185	0
145	36.4844	0	0	0	0	0	42.8536	0	1.80654	0	2.63858	0	0	0	0	103.146	0	0	0	0	0	0	0	2.72794	0	0	0	0	155.083	0	0	0	52.911	0	1557.64	0	12.2201	42.9312	3.27554	0	0	40.7389	5.94817	0	200.942	0.779575	0.0860739	55.9181	0
146	36.7377	0	15.8344	5.59953	0	0	0	0	33.7416	0	64.5843	0	0	0	0	54.4784	2.42901	0	0	0	0	5.25284	0	0	0	0	0	4.88712	100.679	0.511423	0	0	252.072	0	1686.96	0	1.91936	19.1961	0.00114855	15205.1	0	370.181	9.03087	418.79	0.2197	10.9166	0	87.5246	0
147	36.9911	0	0	2.312	0	0	0	117.762	31.5969	0	0.669074	0	0	0	0	128.586	0.581417	0	0	0	0	0	0	0	0	0	0	2.30229	149.276	0	0	0	0.201682	0	821.503	0	15.8434	4.73006	0	79.6911	0	14.5169	161.149	21.8105	0	4.0605	0	119.298	0
148	37.2445	0	3.72021	0	0	5.20797	0	0	0	0	29.2985	0	0	0	0	59.5112	2.32821	0	0	0	0	10.2365	0	3.92237	0	0	0	1406.61	209.421	4.60264	3.81814	0	2.80864	0	1.58251	0	0.715336	54.451	0	79.6911	0	83.0589	51.9052	0	1286.07	4296.69	0	0.233179	0
149	37.4978	0	2.23562	0	0	0	0	0	92.312	0	84.6221	0	0	0	0	83.5899	0	0	0	0	0	0.301128	0	2.06444	0	0	0	6.55643	74.1391	0	0	0.40629	0.15878	0	859.312	53.6492	12.2639	789.703	0	3977.92	0	1057.39	298.21	66.8739	0	5.43426	1.43033	0	0
150	37.7512	0	0	8.35689	0	0	0	0	37.0958	0	77.5263	0	0	0	0	189.51	24.9618	0	0	0	0	31.9656	0	50.7889	0	40.491	0	11.1244	86.1632	0	0	0	0.668703	0	113.39	0	5.80868	25.7879	0	25.6721	0	2132.72	70.6048	0	0	187.387	0	9.87331	0
151	38.0045	0	2.56776	6.2724	0	0	0	0	0	0	78.7788	1.00409	0	0	0	105.716	0	0	0	0	0	11.9634	0	0.000789379	0	0	0	0	68.3925	0	0	0	1.36364	0	73.6873	0	0	11.2626	0	198.779	0	638.609	68.9121	107.052	0	0	0	2.09147	0
152	38.2579	0	9.39336	252.213	0	1.26138	0	1.42868	27.2699	0	11.0797	0	0	0	0	61.0442	1.26123	0	0	0	0	10.6997	0	0	0	0	0	1.22161	404.186	0	0	0	0.835984	0	7.05827	0	0.0326408	175.316	0	2.05064	0	15.4227	269.131	176.108	0	0.00296017	4.29511	0.204047	0
153	38.5113	0	42.9317	33.604	0	0	52.7706	0	41.1233	0	30.0634	0	153.266	0	0	79.5553	0	0	0	0	0	14.6403	0	0.147073	0	0	0	3.0407	181.783	0.989357	0	3.24708	0.650243	0	489.633	0	2.26004	90.4285	0.699927	2.3097	0	14.258	120.066	687.048	0	10.141	69.9083	52.9602	0
154	38.7646	0	123.904	0.355063	0	0	0	0	20.2088	0	94.0207	1.34289	0	0	0	87.9001	0.834836	0	0	0	0	0	0	0	0	0	0	2.53171	62.2234	0.469302	0	0	0	0	1624.63	0	11.4292	501.119	0	0	0	3207.66	84.2403	606.364	0	0	2.35607	239.952	0
155	39.018	0	4.83108	22.9005	0.0589351	0	0	0	0.667179	0	52.0029	0	0	0	0	62.9368	0	0	0	0	0	0	0	101.301	0	0	0	28.348	184.318	0	0	0	0.44058	0	526.999	0	65.9646	46.7177	0	164.524	0	74.6321	68.1271	0	14.1105	7.39773	0	80.1516	0
156	39.2714	0	61.0165	10.3063	0	0	0	0	50.0392	0	6.10343	0	0	0	0	97.1381	0	0	0	0	0	0	0	4.6256	0	0	0	7.55833	377.903	0.755989	0	23.5351	0.463535	0	0.331796	0	3.45757	8.28906	0	7445.81	0	2313.21	408.123	124.824	0	1.20731	1.02303	1.16341	0
157	39.5247	0	0	36.718	0	0	0	1.31968	0	0	27.4675	0.0311331	0	0	0	336.252	4.1589	0	0	0	0	11.5071	0	0	0	0	0	2.61015	110.229	0	6.67888	0	1.5127	0	238.403	0	18.6555	39.2	0	0	0	76.3872	40.9404	0	15952.7	8.0813	0	0	0
158	39.7781	0	34.804	23.5745	0	1.81957	34.0894	0	161.015	0	6.81794	0	0	0	0	73.6765	0	0	0	0	0	6.86635	0	18.9498	0	0	0	427.74	107.561	0	0	4.13163	0	0	95.3891	0	35.7423	929.884	0	0	0	18.3043	194.807	0.752819	23.9394	0	0	144.962	0
159	40.0315	0	4.00175	35.8748	0	0	18.681	0	0	0	7.95737	0.0440118	0	0	0	36.8464	0	0	0	0	0	13.4234	0	0	0	0	0	0.265717	133.722	0	0	0	0.443994	0	2.17633	0	5.19129	35.5399	0.0153692	0	0	8.89639	182.258	445.838	0	0	1.54083	25.1839	0
160	40.2848	0	19.7903	14.9161	0	0	0	0	177.47	0	5.05301	0.240548	0	0	0	28.5162	3.04539	0	0	0	0	9.48152	0	1.79291	0	0	0	9.25743	142.646	0	0	0	1.55848	0	217.286	0	17.56	2.72924	0	0	0	12.5532	14.7213	0	7.17087	43.5916	0	0.00243129	0
161	40.5382	0	2.8165	0.369737	0	0	83.6915	1.32657	0	0	24.9535	0	0	0	0	28.3016	0	0	0	0	0	20.4993	0	3.44805	0	0	0	0	127.307	0	0	0	0.380643	0	56.781	0	0	0	0	172.622	0	0	57.0743	0.669098	0	0	0.0920574	0	0
162	40.7915	0	1.33463	46.9443	0.351349	0	20.3995	2.51316	184.394	0	24.8353	0	0	0	0	46.3845	0	0	0	0	0	0	0	2.99247	0	0	3.96063	0	234.066	0	0	15.7188	1.06321	0	0.655295	0	0.40565	25.053	3.97968	46.1542	0	4362.07	125.926	30.9679	4.20582	0	0	679.541	0
163	41.0449	0	13.1839	58.5803	0	0	0	0	1.03713	0	9.0102	0	0	0	0	62.7014	1.87182	0	0	0	0	0	0	0.406957	0	3.23768	0	29.8625	396.978	0	0	0	0.132466	0	122.89	0	20.1554	581.908	80.0814	66.5597	0	0.339405	9.03141	0	2.25368	0	0.131045	1.15522	0
164	41.2983	0	0	7.87424	0	0	62.0943	1.29403	0	0	0	0.0644883	0	0	0	41.6518	0	0	0	0	0	0	0	0	0	0	19.5036	7.08735	84.6889	0	0	0	2.2055	0	182.107	0	22.999	66.9319	0	0	0	7.07667	45.3029	0	0.139716	0.619777	0.190651	179.08	0
165	41.5516	0	0.819964	0	0	0	1.00257	0	183.841	0	13.4738	0	0	0	0	4.74815	0	0	0	0	0	0	0	10.3994	0	0	0	1.30535	94.7467	0	0	0	0.372595	0	720.057	0	2.17618	43.6638	0	0	0	17.7645	65.4339	2.35301	0	0	0	7.88459	0
166	41.805	0	0	11.6322	0	0	0	19.5975	0	0	3.88683	0	0	0	0	65.8003	0	0	0	0	0	0	0	0	0	0	0	0	299.005	0	0	0	0	0	53.0219	0	1.44341	5.81125	3.81264	0	0	16.6588	77.4917	0	0	0	0.132458	1.12287	0
167	42.0584	0	0	5.77539	0	0	0	0	10.5304	0	0	0.383626	0	0	0	64.9725	0.913016	0	0	0	0	0	0	1.40335	0	0	0	0.667633	181.985	0	0	0	0.448881	0	13.6765	0	1.44943	2.04942	36.1253	0	0	18.1946	23.3471	4.80046	455.641	0	0.16875	0	0
168	42.3117	0	3.23081	18.3035	0	0	0	0	10.5302	0	29.203	0	0	0	0	12.9182	0	0	0	0	0	14.6722	0	2.40074	0	0	0	0	44.7314	0	0	0	0	0	51.3558	0	39.0673	472.252	0	0	0	8.73283	7.48465	0	0	0.176458	0	24.1553	18.4526
169	42.5651	0	0	40.6076	0	0	13.8456	0	209.031	0	1.44395	0	0	0	0	205.834	0.416255	0	0	0	0	0	0	2.49812	0	0	0	8.21197	344.847	0	0	0	0	0	107.682	0	0.438887	62.3631	0	4.84544	0	53.0648	29.0891	0	0	9.59952	0	33.5995	0
170	42.8185	0	2.02067	27.8727	0	0	0	0	23.5548	0	104.31	0	0	0	0	5.50449	0	0	0	0	0	8.74326	0	0	0	0	0	0	0.175953	0	1.9768	0	0.295019	0	95.1136	0	31.2119	20.6659	0	0	0	11.6561	9.18409	62.3286	0	0.559358	0	57.8913	0
171	43.0718	0	105.119	73.4714	0	0	0	0	0	0	65.1993	0	0	0	0	79.2633	0	0	0	0	0	3.9255	0	1.87331	0	0	0	6.85361	15.5444	0	0	0	0.151537	0	110.582	0	0	13.636	0	0	0	3.56817	52.7576	0	0	10.442	0	21.5711	0
172	43.3252	0	0	12.1046	0	0	0.347197	0	0	0	3.76518	0	0	0	0	58.4864	0	0	0	0	0	0	0	0.157564	0	0	1.9144	0	83.2763	0	0	0	0.390419	0	128.403	0	67.9344	1277.4	0	9386.93	0	0	25.6832	60.7216	0	9.80385	0	0.589382	0
173	43.5785	0	12.7305	5.62735	0	0	0	3.5013	10.7753	0	4.00707	0	0	0	0	12.6705	0	0	0	0	0	0	0	0	0	0	0	16.7898	16.8347	0	0	0	0.187245	0	202.483	0	0	47.8953	0	0	0	6965.48	14.316	0	0	0	0	0	0
174	43.8319	0	16.1495	11.5347	0	0	0.290314	0	0	0	42.971	0	0	0	0	21.3881	0.708381	0	0	0	0	0	0	0	0	0	0	4.94342	63.9175	0	0	0	0	0	15.9925	0	17.0318	70.6058	0	0	0	0	31.79	0	21.3312	0	5.83238	0	0
175	44.0853	0	0	22.4292	0	0	0	19.5645	10.6774	0	67.8495	0	0	0	0	14.6083	0.659732	0	0	0	0	7.77852	0	0	0	0	0	0	18.3965	0.667625	0	0	1.91168	0	120.467	0	0	111.193	0	28.656	0	6.02278	11.4414	0	32.7976	0	0	0	0
176	44.3386	0	15.4241	18.9704	0	0	0	0	0	0	2.8978	0.390455	0	0	0	19.9107	0	0	0	0	0	0	0	9.39555	0	0	0	0	52.7759	0	0	0	1.23835	0	69.2702	0	1.07048	157.441	0	28.6663	0	16.0641	64.8668	5.86673	53.5101	0	2.15153	0	0
177	44.592	0	0	0	0	0	0	0	0.996504	0	4.04264	0	0	0	0	21.1133	0	0	0	0	0	9.61126	0	38.1319	0	0	0	0	5.04423	0	0	0	0.224752	0	153.73	0	35.6972	27.4507	0	47.1041	0	7.73461	0.61092	0	138.586	22.9206	0	0	0
178	44.8454	0	5.11725	12.7958	0	0	0.397989	3.46835	0.877948	0	25.5427	0	0	0	0	42.6365	0	0	0	0	0	0	0	0.206829	0	0	0	0	55.7258	0.983413	0	0	0	0	0.732102	0	253.57	168.678	0	9646.43	0	11.249	137.153	0	69.0572	0	0	0.270015	0
179	45.0987	0	2.8246	0	0	0	0	3.17002	2.26826	0	2.04029	0	0	0	0	16.7031	0	0	0	0	0	0	0	0	0	0	0	4.83713	35.2964	0	0	0	0.475277	0	0.474642	2.36422	7.09838	176.733	0	0	0	5.11869	28.6047	0	96.1828	0	0	33.7526	0
180	45.3521	0	0.520323	0.355919	0	1.06558	73.8184	0	0	0	2.79819	0	0	0	0	21.7632	0	0	0	0	0	12.8107	0	1.88844	0	0	0	0	27.6866	0	0	0	0.414665	0	446.866	16.082	24.557	62.7062	0	0	0	7.75076	35.8639	0	125.579	5.04927	0	40.5603	0
181	45.6055	0	0	0	0	0	0	1.26167	0.913099	0	0	1.26499	0	0	0	28.8171	0	0	0	0	0	0	0	0	0	0	0	0	28.8255	1.10397	0	0	1.48271	0	1.1035	0	88.7389	18.5766	0	28.6551	0	1.06797	0	0	3208.72	19.0534	0	0	0
182	45.8588	0	0	35.5968	0	0	0	0	0	0	0	0	0	0	0	15.0339	2.78003	0	0	0	0	0	0	0	0	0	0.788878	0	46.8761	0	0	0	0.388556	0	42.0929	0	26.3866	31.993	0	0	0	0	0	114.713	30.7054	4.75324	0	0.00155113	0
183	46.1122	0	0.720551	16.2232	0	0	49.8923	0	0.118383	0	7.15652	0.229161	0	0	0	24.2713	0	0	0	0	8.02486	0	0	3.40659	0	0	0	0	7.10365	0	0	0	0.474725	0	0.196666	0	16.9024	29.4403	0	9124.06	0	0	0	0	0	0.499432	0	0	0
184	46.3655	0	63.6884	88.5195	0	0	0	0	81.5631	0	71.3203	0	0	0	0	176.63	0	0	0	0	0	0	0	32.3662	0	0	0	366.181	594.831	0	17.1623	7.72058	4.27298	0	174.133	0	0	453.797	61.2522	11803.7	0	3112.02	252.319	1133.24	19.9502	0	1.19099	4872.53	0
185	46.6189	0	0	0	0	0	49.9505	1.23364	0.829784	0	13.8126	0	0	0	0	20.9779	3.49965	0	0	0	0	0	0	0.0747266	0	0	0	0.262496	13.8106	0	0	0	0.584425	0	69.7297	0	0	36.064	0	0	0	0	0	0	40.4326	0.159044	4.57842	0.669082	0
186	46.8723	0	0	0	0	0	17.4805	0	0	0	43.0486	0	0	0	0	16.1864	2.89398	0	0	0	0	0	0	0	0	0.844474	0	0	0.378981	0	0	0	0	0	7.58374	0	35.2176	43.1469	0	0	0	1.51007	0	0	1.84475	0	0	0	0
187	47.1256	0	4.05527	1.19864	0	0	0	4.93265	0	0	5.1235	0	0	0	0	2.06945	0	0	0	0	0	0	0	0	0	0	0	0	5.14193	0	0	0	0.954821	0	4.29338	0	18.838	81.0583	0	0.656128	0	238.167	0	0	0.414665	0	3.70767	0	0
188	47.379	0	0	1.67905	0	0	0	0	2.57918	0	0	0	0	0	0	2.2158	0	0	0	0	0	1.53042	0	0.977263	0	0	0	0.449362	0.715371	0	0	0	0	0	1335.8	0	15.8249	92.4046	0	0	0	50.9251	10.1634	5.9794	6.17926	0	3.80809	0	0
189	47.6324	0	0.817351	0	0	0	0	0	1.27036	0	0	0.0311331	0	0	0	9.07201	0	0	0	0	0	0	0	1.51615	0	0	0	0	13.902	0	0	0	0.0123498	0	28.5124	3.08912	35.6917	24.8256	0	0	0	593.046	43.7991	0	17.7041	0.0174216	1.52879	0.356113	0
190	47.8857	0	0	1.43015	0	0	0	0	0	0	2.04267	0	0	0	0	36.988	0	0	0	0	0	0	0	0	0	0	0	0	0.390131	0	0	0	6.05399	0	42.2358	0	2.57833	250.589	0	0	0	4.84475	0	6.23018	0	4.40575	2.29813	176.79	0
191	48.1391	0	0	0.530625	0.186151	0	0	3.92775	0	0	5.05089	0	0	0	0	12.747	0	0	0	0	0	0	0	0.628748	0	0	0	0	17.5053	0	0	0	0.423005	0	4.94748	0	2503.73	70.2054	0	0	0	541.801	9.12485	238.304	0.0870291	0.276472	2.81663	27.5304	0
192	48.3925	0	0	0	0	1.11827	0	1.11861	1.96587	0	0	0	0	0	0	4.34635	1.64046	0	0	0	0	0	0	0	0	0	0	0	0	0	0	4.73804	1.89876	0	29.4514	0	1.67364	161.736	0	0	0	4.07424	4.18688	18.3277	6.01529	0	0	0	0
193	48.6458	0	0	0	0	0	0	0	1.58772	0	0	0	0	0	0	9.65337	1.78297	0	0	0	0	0	0	0	0	0	0	0	0.125322	0	0	0	1.81508	0	4986.25	0	0.872205	47.8149	0	0	0	0.899888	0	0	0	23.5339	2.66455	0.00601507	0
194	48.8992	0	0	0	0	0	0	0	1.45199	0	4.77847	0	0	0	0	12.4336	0	0	0	0	0	0.811738	0	0.830759	0	0	0	68.6848	2.5263	0	0	0	1.73811	0	3.91028	0	0	99.7783	0	1.68675	0	28.9862	0	0	6.37503	0	6.8012	10.0337	0
195	49.1525	0	0	0	0	0	0	0	0	0	7.35638	0	0	0	0	5.80238	0	0	0	0	0	0	0	0	0	0	0	6.99601	0	0	0	0	0.958302	0	13.9408	0	8.17857	85.0383	0	0	0	13.4106	0	0	4.71657	0	2.60108	0	0
196	49.4059	0	0	0	0	0	0	0	0	0	0	0.103042	0	0	0	0.894347	0	0	0	0	0	0	0	21.4909	0	0	0	0	0	0	0	0	0	0	104.999	0	11.7321	117.981	0	0	0	93.377	0	0	0	2533.67	0.121118	0	0
197	49.6593	0	280.301	57.3438	0	0	0	0	21.4636	0	225.285	0	0	0	0	587.298	0	0	0	0	0	0	0	0	0	0	0	0	2209.4	0	25.8308	5.50491	42.3367	0	806.182	0	0.440809	473.578	0	21928.4	0	0.444563	1160.96	7174.99	0	2.14788	1234.84	23428.2	10.4286
198	49.9126	0	76.6887	47.493	0	0	0	27.7081	664.211	0	64.6166	0	0	0	0	33.7714	6.76544	0	0	37.6733	0	0	0	5.60017	0	0	0	12.2875	1238.18	0	0	0	0.399284	0	39.4431	0	31.0783	143.85	0	0	0	1153.83	0.213223	0	6.01009	5.10761	0	0	0
199	50.166	0	0	11.8916	0	0	0.821286	0	0	0	0	0.120432	0	0	0	1.65175	0	0	0	0	0	0	0	0	0	0	0	9.27378	0	0	0	0	0.209426	0	3.04163	0	3.21399	60.2374	0	12.456	0	275.809	0.0375192	0	0	11.9927	2.23134	0	0
200	50.4194	0	0	0	0	0	0	0	0	0	0	0	0	0	0	4.30409	0	0	0	0	0	4.31636	0	0	0	0	0	0	0	0	0	0	0.84846	0	68.466	0	136.711	141.192	0	0.0143983	0	22.738	1.22823	0	3.47345	5.68886	0	0	0
201	50.6727	0	0	4.56442	0	0	0	0	0	0	0	0.417945	0	0	0	1.06921	0	0	0	0	0	0	0	0	0	0	0	10.0263	0	0	0	0	22.1704	0	22.8573	0	0	143.259	0	0	0	354.876	0	0	3.53323	3.81726	2.09504	0	0
202	50.9261	0	6.93894	0	0	0	0	0	0	0	1.53237	0	0	0	0	9.10928	0.486068	0	0	0	0	0	0	6.18134	0	0	0	0	0.248504	0	0	0	0	0	105.682	0	0	157.577	0	5.87944	0	3.28592	0.243291	0	36.4198	9.24905	2.04117	58.7427	0
203	51.1795	0	0	0.378598	0	0	0	0	0	0	0.975306	0	0	0	0	10.9717	0.891059	0	0	0	0	0	0	13.5334	0	0	0	27.1262	0.220083	0	0	0	0	0	0.181636	0	1.54364	26.5904	0	0	0	51.3487	9.94766	0	0	0	0	0	0
204	51.4328	0	5.8057	0	0	1.08327	0	0	0.701498	0	1.50682	0	0	0	0	10.58	2.26025	0	0	0	0	0	0	0	0	0	0	10.4141	0	0	0	0	0	0	3.65347	0	10.6442	24.1291	0	54.9974	0	0	0	0	6.65417	2.01288	2.91605	0	0
205	51.6862	0	0	0	0	0	0	0	3.40999	0	2.04781	0	0	0	0	19.9737	0	0	0	0	0	0	0	18.2483	0	0	0	0.322592	0	0	0	0	1.66944	0	21.0922	0	0	129.678	0	0	0	611.432	0	0	0	0.886264	0	0	0
206	51.9395	0	0	10.724	0	0	0	1.34281	6.98864	0	0	0	0	0	0	6.26713	3.43088	0	0	0	0	0	0	0	0	0	0	4.13996	0	0	0	0	0	0	64.642	0	18.7325	98.3598	0	0	0	7.57013	8.0262	53.4519	0	0	0	0	0
207	52.1929	0	0	0.700191	0	0	0	0	1.40682	0	4.47205	0	0	0	0	7.08681	0.14564	0	0	0	0	0	0	0	0	0	0	0	0	0	0	0	0	0	53.9064	0	5.72133	13.7379	0	0	0	239.765	0	0	0.465154	0	0	0	0
208	52.4463	0	0	0	0	0	0	0	1.96145	0	0	0	0	0	0	6.15544	0	0	0	0	0	0	0	0	0	0	0	0	0	0	0	0	0.0165533	0	250.683	0	0	93.1875	0	0	0	0.140888	0	0	1.22268	0.195257	0	0	0
209	52.6996	0	72.7324	1.03661	0	0	0.426261	0	0.0257456	0	32.2216	0	0	0	0	25.3149	0	0	0	0	0	0	0	0	0	0	0	10.0257	215.244	0	5.40105	0	0	0	7.15977	44.3032	6.98196	142.096	40.9432	2004.59	0	0	432.421	271.227	0	43.1792	420.044	964.763	0
210	52.953	0	4.16542	0	0	0	0	0	0	0	1.55491	0	0	0	0	0	0	0	0	0	0	0	0	0	0	0	0	0	0	0	0	0	0	0	2.24722	0	0	40.7	0	47.9677	0	642.833	0	0	0	0	0	0	0
211	53.2064	0	138.162	46.3346	8.01881	8.06857	52.8885	66.2113	794.832	0	292.197	0	9.45828	0	0	14.4909	57.4988	0	745.232	0	0	22.7401	0	4.18602	0	0	45.6409	25.0165	3290.33	2.56458	0	0	0	0	1.18991	0	3.59154	65.5523	0	0	0	2.83817	0	0	0	0	0	0	0
212	53.4597	0	0	0.856879	0	0	0	0	0	0	0	0	0	0	0	0	0	0	0	0	0	0	0	0	0	0	0	0	0	0	0	0	0.310933	0	2.2356	0	23.1201	50.1491	0	0	0	41.8706	0	7.90739	0	0	9.84501	0	0
213	53.7131	0	0	0.0840018	0	0	0	0	0.0542106	0	0	0	0	0	0	0.0777815	0	0	0	0	0	0	0	0	0	0.066221	0	10.0255	0	0	0	0	0.837014	0	0.701758	0	61.4991	72.9831	0	0	2.11163	6.86596	0	0	1.58226	0	3.87413	0	0
214	53.9665	0	0	0	0	1.2333	0	0	1.36768	0	0.828288	0	0	0	0	0.133879	0	0	0	0	0	0	0	0.207555	0	0	0	16.6112	0	0	0	0	0	0	25.8224	0	0.0807496	26.1539	0	0	0	457.155	0	0	81.9118	21.3864	2.37179	0	0
215	54.2198	0	8.54736	0	0	0	0	0	0.0280269	0	2.34301	0	0	0	0	5.9457	0	0	0	0	0	0	0	0	0	0	0	0	149	0	0	0	0	0	0.218611	0	0.088963	75.8215	0	0	0	332.227	14.5044	48.4684	0	0	0	0.123301	0
216	54.4732	0	14.0663	0.394548	0	0	0	0	1.15287	0	0	0	0	0	0	9.7111	10.8229	0	0	0	0	0	0	12.1721	0	0	0	0.0309989	0	0	0	0	2.14842	0	123.361	0	0.662692	38.3956	0	0	0	28.7782	11.5296	0	0	5.786	4.28307	0	0
217	54.7265	0	9.93633	1.06976	0	0	0	0	0.0301069	0	12.4744	0	0	0	0	1.13537	0	0	0	0	0	0	0	37.1316	0	0	0	0	0	0.952003	0	4.6045	0	0	7.30194	0	0	286.922	0	16.4349	0	2.25676	0	0	0	195.991	0	0	0
218	54.9799	0	0	0.306824	0	0	0	0	2.7495	0	4.2968	0	0	0	0	2.23038	2.87482	0	0	0	0	0	0	0	0	0	0	0	1.12288	0	0	0	0	0	1.70128	0	250.433	41.9968	0	0	0	43.9188	25.6144	2.00109	0	0.0558091	0	0.00213527	0
219	55.2333	0	1.38822	0	0	0	0	2.60605	1.06283	0	0	0.0311331	0	0	0	2.11923	0	0	0	0	0	0	0	0	0	0	0	0	0	0	0	0	0	0	6.90596	0	5.42292	53.4978	0	164.864	0	32.35	33.4478	0	1.46836	56.3344	0	10.0236	0
220	55.4866	0	0	0	0	0	0	0	0	0	4.44272	0	0	0	0	15.7242	0	0	0	0	0	0	0	0	0	0	0	0	3.17534	0	0	0	0.955713	0	0.0591324	0	0	210.409	0	0	0	28.1415	33.9754	0	0	156.156	0	49.5081	0
221	55.74	0	0	0	0	0	0	1.44086	2.09697	0	0.659755	0	0	0	0	2.10248	0	0	0	0	0	0	0	0	0	0	0	0	0	0	0	0	0	0	0	0	4.17324	43.7107	0	0	0	176.904	0	0	4.73628e-05	3.71768	7.08295	22.1328	0
222	55.9934	0	6.89199	0	0	0	0	0	0	0	0	0	0	0	0	0	0	0	0	0	0	0	0	0	0	0	0	0	0	0	0	0	0	0	0	2.34223	0	5.66215	0	0	0	6.6166	0	3.61966	0	16.9706	2.30126	0	0
223	56.2467	0	0	0	0	0	0	5.9274	0	0	0	0	0	0	0	0	0	0	0	0	0	0	0	0	0	0	0	0	7.68051	0	0	0	0.307826	0	640.887	0	18.2466	1.11888	0	0	0	6.62447	6.09637	4.48369	0	0	0	0.58103	0
224	56.5001	0	177.363	9.8141	0	2.19858	39.3901	14.5076	3.66422	0	6.94443	0	0	0	0	13.0804	29.4336	0	0	0	0	7.67796	0	76.3798	0	0	11.5793	24.612	142.548	0	5.20603	0	0	0	146.834	3.90506	10.3833	2.08626	0	0	0	0	5.40494	0	0	0.16097	2.9846	0	0
225	56.7535	0	0	0	0	0	0	0	11.8953	0	2.96353	0	0	0	0	0	0	0	0	0	0	0	0	0	0	0	0	0	0	0	0	0	0	0	12.5354	0	9.58588	37.8366	0	0	0	8.8041	0	5.46416	0	0	3.56756	22.0117	0
226	57.0068	0	5.74827	0	0	0	0	0	0.0335526	0	0	0	0	0	0	0	0	0	0	0	0	0	0	0.300272	0	0	0	0	0	0	0	0	0.935205	0	116.024	0	6.0031	22.3957	0	0	0	372.276	0	0	0	18.1319	0	11.8478	0
227	57.2602	0	0	0	0	0	0	0	0.0145364	0	0	0	0	0	0	6.27808	0	0	0	0	0	0	0	0.0462063	0	0	0	0	14.3683	0	0	0	1.55412	0	0.0574234	0	0	1.24892	0	0	0	748.723	6.32911	3.56194	0	0	1.65752	32.4867	0
228	57.5135	0	0	4.21577	0	0	0	0	0.0228802	0	0	0	0	0	0	4.48742	0	0	0	0	0	0	0	0	0	0	0	6.40179	0	0	8.75335	0	0	0	2.66804	0	27.7173	44.2264	0	17186.3	0	41.9689	0	0	0	0	0	0	0
229	57.7669	0	0	0.0981396	0	0	0	0	0.0390506	0	2.24696	0	0	0	0	0.847971	1.70202	0	0	0	0	0	0	6.39704	0	0	0	0.475652	13.1352	0	0	0	0	0	20.7794	0	0	5.44787	0	0	0	5.4156	0	0.424619	0	4.45626	0	0	0
230	58.0203	0	0	0	0	0	0	1.19923	0.0207054	0	2.04062	0	0	0	0	4.21986	0	0	0	0	0	0	0	0.0466602	0	0	0	9.24334	0.289079	0	0	7.70038	0.248374	0	216.978	0	22.7736	84.0971	0	0	0	8.54904	0	91.8917	0	0.0323251	2.23814	0.00574668	0
231	58.2736	0	0	0	0	0	0	0	1.48324	0	3.97229	0	0	0	0	0.315708	0	0	0	0	0	0	0	0	0	0	0	0	0	0	0	0	0	0	0.36036	0	0	10.8528	0	0	0	708.89	0	49.525	0	0	0	0	0
232	58.527	0	0	0.000244708	0	0	0	0	0	0	0.623787	0	0	0	0	0	1.28029	0	0	0	0	0	0	0	0	0	0	0	12.616	0	0	0	0	0	0.0530897	0	0.0756146	6.01886	0	0	0	1339.01	0	0	35595.3	0	0	21.9977	0
233	58.7804	0	0	1.172	0	0	0	0	26.7148	0	0	0	0	0	0	4.91619	5.67131	0	0	0	0	0	0	19.142	0	0	0	0	0	0	0	0	0.812994	0	0.13541	0	5.50599	30.5012	17.6165	0	0	4.55101	0	0	0	0	0	0	0
234	59.0337	0	0	0	0	0	0	0.899324	0	0	2.10379	0	0	0	0	1.64615	0	0	0	0	0	5.95456	0	35.8226	0	0	0	0	10.7538	0	0	0	0	0	719.306	4.65002	5.51627	8.11222	0	0	0	1693.96	0	7.86346	0	13.3664	4.39829	278.572	0
235	59.2871	0	3.68577	0	0	0	0	0	0	0	0	0	0	0	0	3.44328	1.317	0	0	0	0	0	0	0	0	0	0	0	0.53606	0	4.61584	0	58.0045	0	0	3.4795	0	24.8718	0	6.23295	0	0	0	0	0.239225	13.1009	6.05443	25.2469	0
236	59.5405	0	0	0	0	0	0	0	0	0	3.95145	0	0	0	0	3.15771	3.2312	0	0	0	0	0	0	2.04946	0	0	0	0	2.47618	0	0	0	0.945653	0	60.9803	0	22.695	7.06643	0	0	0	30.1739	0	9.89668	0	0	7.00742	0	0
237	59.7938	0	0	1.64295	0	0	0	1.86951	12.3842	0	0	0	0	0	0	0	4.86327	0	0	0	0	0	0	0	0	0	0	0	2.19374	0	0	0	0	0	1.47654	0	843.412	0	0	0	0	0	0	21.6711	55.1628	0	5.5494	4.51433	0
238	60.0472	0	0	0	0	0	0	1.50953	2.07607	0	0	0	0	0	0	0.440016	0	0	0	0	0	19.6782	0	0	0	0	0	12.2067	0.27144	0.823165	7.48186	0	0	0	52.3307	0	9.84164	42.1623	28.4209	377.657	0	2.80597	0	0.394717	0	4.3202	8.81758	394.045	0
239	60.3005	0	0	0	0	0	0	5.27038	0.0317962	0	0	0	0	0	0	22.1784	0	0	0	0	0	0	0	20.8555	0	0	21.8157	0	0.22461	0.697815	4.11538	0	0	0	66.8992	0	38.7912	42.707	0	0	0	1093.32	0	50.7098	0	0	157.118	0	0
240	60.5539	0	0	0	0	0	0	3.32809	2.5261	0	3.79718	0	0	0	0	9.61349	3.23508	0	0	0	0	0	0	0	0	0	26.6762	0	10.5058	0	0	0	0	0	0	0	19.7339	42.01	0	240.431	0	7.83746	0	4.3218	0.640119	13.1114	82.6673	31.9679	0
241	60.8073	0	0	0.397397	0	0	0	0	0	0	0	0	0	0	0	6.36127	0	0	0	0	0	0	0	0	0	0	0	0	10.4022	0	0	0	0	0	0	0	54.233	50.9721	47.9063	0	0	18.3444	0	10.0655	0	0	0.107849	26.2762	0
242	61.0606	0	6.92681	0.834457	0	0	0	0	0	0	0	0	0	0	0	24.6683	0	0	0	0	0	0	0	9.71765	0	0	10.652	6.11253	28.3332	0	0	0	13.7617	0	1693.56	0	0	30.3985	0	0	0	1.76355	135.603	0	0	0	0	13.9873	9.107
243	61.314	0	0	0	0	0	0	0.700787	0	0	0	0	0	0	0	7.3064	1.23235	0	0	0	0	0	0	3.01734	0	0	6.43819	0	0	0	0	7.61121	0.960761	0	7.82006	0	3.86456	71.331	0	7.19925	0	59.3835	0.0443197	7.74006	1.8241	0.339287	0	7.05278	0
244	61.5674	0	0	0	0	0	0	0	0	0	0	0	0	0	0	5.43035	0	0	0	0	0	0	0	0.0449394	0	0	0	0	0.560092	0	0	0	0.545962	0	2.73134	6.07206	0	16.015	37.8136	0	0	0	0	4.80901	0	0	0	4.53039	0
245	61.8207	0	4.72329	0	0	0	0	0	0	0	7.24764	0	0	0	0	10.8465	0	0	0	0	0	0	0	0	0	0	0	0	0.348554	0	3.43086	0	0.955899	0	101.007	0	0	20.6312	0	0	0	3.3652	0	56.2454	0	0	3.55495	3.38589	0
246	62.0741	0	0.537575	0.441895	0	0	0	0	0	0	3.39801	0.0311331	0	0	0	0.185433	0	0	0	0	0	0	0	0	0	0	4.06479	0	0.110805	0	0	0	0.990809	0	0.922488	0	0	9.96188	0	0	0	4.65219	0	0	2.49829	0	0	577.493	0
247	62.3275	0	7.17468	0	38.4977	0	0	1.56829	0	0	0	0	0	0	0	0.294766	4.82041	0	0	0	0	0	0	3.06319	0	0	8.73829	0	0.0668959	0	0	0	2.05783	0	61.6425	0	0	356.206	0	0	0	57.2119	37.2221	0	0.310305	5.29247	0.390415	2.70793	0
248	62.5808	0	0	0	0	0	0	0	0.0325343	0	0	0	0	0	0	7.51265	0	0	0	0	0	0	0	50.6727	0	0	0	0	0.224053	0	0	0	0.881875	0	4.42944	0	0	19.0876	32.1355	0	0	0	20.0282	0	0	0	180.237	0	0
249	62.8342	0	0	0.398242	0	0	0	21.4904	0.0582878	0	0	0	0	0	0	0.305312	0	0	0	0	0	0	0	0	0	0	4.9565	4.33027	8.55339	0	5.22394	0	1.88268	0	14.838	0	5.18842	114.351	0	7.32744	0	0	0	8.46033	0	0	0	0	0
250	63.0875	0	7.51746	0	0	0	0	0	1.24224	0	0	0	0	0	0	3.21517	0	0	0	0	0	0	0	0	0	1.29863	0	4.34866	9.95903	0	0	0	41.1449	0	8.91973	0	19.6084	5.55004	0	0	0	68.3017	84.888	5.98519	0	11.992	0	3.92879	0
251	63.3409	0	8.97038	0	0	0	0	2.55283	0.0322106	0	0.919272	0	0	0	0	6.00599	0	0	0	0	0	0	0	0	0	0	0	0	16.9683	0	3.38808	0	7.48385	0	1.72536	0	0	0	0	496.486	0	1351.66	0	4.91713	0	17.9478	0	0	0
252	63.5943	0	2.65303	0	45.9582	0	25.9758	2.03938	0	0	8.69346	0	0	0	0	8.39408	1.10479	0	0	0	0	0	0	24.1137	0	0	0	15.9627	0.0477417	4.94181	7.20446	0	0	0	0	0	0	28.3758	24.4589	0	0	3.23075	41.8641	17.4566	0	0	0	2.55838	0
253	63.8476	0	0	0	22.3175	0	20.418	4.96486	0	0	0	0	0	0	0	0	0	0	0	0	0	0	0	49.922	0	0	3.18957	0	5.78398	0	0.634006	0	0.154991	0	54.2785	0	0	0	0	7.26084	0	0	0	0	0	31.2229	359.028	0.681953	0
254	64.101	0	0	0	0	0	0	0	0	0	0.360186	0	0	0	0	0	1.03531	0	0	0	0	0	0	0	0	0	4.24494	0.320788	5.85646	0	9.78198	0	0	0	0	2.85757	0	137.381	0	0	0	0	90.9511	2.36631	0	0	0	9.28778	0
255	64.3544	0	29.5185	1.06162	3.47413	0	31.1143	2.88329	1.77975	0	0	0	0	0	0	33.8767	0	0	0	0	0	0	0	0	0	0	20.8049	0	4.1781	0	5.62093	0	0	0	7.31051	0	728.458	135.619	0	0	0	17.3209	0	0	0.618787	0	276.771	17.8371	0
256	64.6077	0	0	0	53.5739	0	0	2.88069	0	0	0	0	0	0	0	4.89406	0	0	0	0	0	0	0	6.90988	0	0	0	16.8382	39.2281	0	3.20649	0	0	0	0.145708	0	4.82081	0	0	0	0	1366.37	0	0	1.90251	14.708	168.538	1266.09	0
257	64.8611	0	2.76358	0	10.3335	0	0.515011	0	1.51903	0	0	0	0	0	0	0.273465	1.42662	0	0	0	0	0	0	65.0202	0	0	0	0	0	0	0	0	0	0	81.5504	0	0	3.08606	0	0	0	0	0	0	1.57334	0	0	0	0
258	65.1145	0	16.6581	0	0	0	0	0.808234	0	0	0	0	0	0	0	5.64793	0	0	0	0	0	0.0158823	0	0	0	0	0	10.8011	0.398313	0	0	2.68284	0	0	0	0	0	2.45846	14.7362	0	30.5936	41.6467	143.143	0	0	0	2.14386	0	0
259	65.3678	0	0	0	6.56513	0	0	0.93513	7.22186	0	0.567024	0	0	0	0	4.1509	0	0	0	0	0	0.0259785	0	0	0	0	0	8.22939	2.60012	0	0	2.6956	0.516033	0	45.4586	0	0	0	0	182.792	0	0	0	21.3221	0	57.3823	564.664	48.3987	0
260	65.6212	1.90307	9.76955	2.32079	7.0927	0	0	2.63116	0	0	7.59348	0	0	0	0	1.73773	4.6976	0	0	0	0	0	0	0	0	0	0	0	0.163173	0	0	2.27003	0	0	7.6192	0	0	13.5395	0	0	0	0	0	0	0	0	131.744	6.96555	0
261	65.8745	0	105.243	0	33.2739	0	0	0	0	0	6.65853	0	0	0	0	5.32812	5.54541	0	0	0	0	0	0	3.88865	0	0	0	0	32.0325	0	0	0	0	0	101.699	0	16.3954	9.77688	0	0	0	43.019	0	0	0	0	0	546.829	0
262	66.1279	0	16.0564	0	0	0	0	3.29727	1.00362	0	0	0	0	0	0	26.1487	0	0	0	0	0	10.4368	0	3.95365	0	0	5.49498	5.55403	8.93823	0	0	0	1.65715	0	48.2152	0	4.2463	115.387	0	0	0	86.447	0	0	0.933875	0	0	0	0
263	66.3813	0	0	0	0	0	0	3.14824	0.0383599	0	0	0	0	0	0	0	0	0	0	0	0	0	0	0	0	0	0	0	14.5324	0	0	0	0	0	0	0	0	36.9482	0	247.467	0	0	94.0836	0	0	0	0	25.7265	0
264	66.6346	2.44276	0	0	0	0	22.022	1.00037	0	0	0	0	0	0	0	6.36047	0.0779275	0	0	0	0	0	0	0	0	0	2.96748	0	1.09016	0	2.92955	0	13.4223	0	0	0	5.34168	0	0	6.79002	0	0	22.9301	0	0	0	50.0144	26.4434	0
265	66.888	0	106.072	0	0	1.31423	0	7.19974	0	0	0	0	0	0	0	0	0	0	0	0	0	7.61918	0	3.93894	0	0	0	4.30402	6.25726	0	0	0	1.02797	0	140.537	0	38.8009	0	0	0	0	12.8408	0	0	6.31097	2.27288	0	2.53424	17.12
266	67.1414	0	0	0	0	0	0	16.0635	0	0	0	0	0	0	0	8.12589	0	0	0	0	0	0	0	0.0295978	0	0	0	0.314844	157.502	0	0	0	0.877032	0	1.66026	0	0	0	0	0	0	7.68153	0	0	0	0.191926	175.227	11.858	0
267	67.3947	0	26.2784	0	0	0	60.6495	4.98377	2.29325	0	5.47258	0	0	0	0	3.0982	0	0	0	0	0	0	0	0	0	0	0	8.81366	12.0391	0	0	0	0	0	10.2304	0	15.3688	0.163141	0	0	0	22.1859	0	0	0	0	253.463	0.896076	0
268	67.6481	0	0	0	0	0	0	4.55643	30.5163	0	0	0	0	0	0	13.2382	0	0	0	0	0	0	0	0	0	0	0	0	0	0	0	0	0	0	0	0	0	78.3469	0	40.7195	0	3.7855	0	0	0	0	2.70845	15.48	0
269	67.9015	0	16.5559	0	0	0	0	1.87698	42.6417	0	6.977	0	0	0	0	0.348033	0	0	0	0	0	0	0	0	0	0	0	0	1.00567	0	0	0	0	0	52.226	0	0	0	0	0	0	0	0	0	1.76652	0	0.0905734	308.858	0
270	68.1548	0	19.7416	0	0	0	0	9.06008	2.03069	0	4.43067	0	0	0	0	8.25858	0	0	0	0	0	0	0	0	0	0	0	0	46.1331	0	0	0	0	0	37656.6	0	3878.33	133.799	0	0	0	0	1.88958	1677.1	0	0	315.982	0	0
271	68.4082	0	97.3956	0	0	0	22.1925	3.66486	0.0602967	0	5.12871	0	0	0	0	0.265741	0	0	0	0	0	0	0	0	0	0	0	0	2.30537	0	0	0	0	0	0	4.11132	0	41.8839	0	0	0	0	0	0	2.59053	0	0	5.70315	0
272	68.6615	0	0	0	0	0	0	1.46056	0	0	0	0	0	0	0	0.213922	0	0	0	0	0	0	0	2.08157	0	0	0	0	0	0	0	0	0	0	0	0	0	18.5545	0	0	0	0	0	18.1333	0	0	0	3.56193	0
273	68.9149	0	0	0	0	0	0.700929	6.03306	0	0	0	0	0	0	0	0	4.02086	0	0	0	0	0	0	0	0	0	0	0	0.391232	0	0	0	0	0	0	0	0	6.27809	0	0	0	0	0	0	0	0	0	7.34	20.4384
274	69.1683	0	6.62856	11.1819	0	0	0	0	0	0	0	0	0	0	0	0	3.38328	0	0	0	0	0	0	0	0	0	0	0	1.96869	0	0	0	7.70395	0	0	0	0	47.7305	0	0	0	8.19679	156.471	0	0	0	0.480428	8.59229	18.3588
275	69.4216	0	0	0	0	0	0	0	0.0352494	0	4.14222	0	0	0	0	0	0	0	0	0	0	0	0	0	0	0	0	0	26.0417	0	0	0	0	0	0	0	0	0	0	0	0	0	2.61644	0	0	0	12.4528	5.87145	0
276	69.675	0	65.5552	0	0	0	34.7689	2.14872	0	0	1.8873	0	0	0	0	1.75877	0	0	0	0	0	0	0	0	0	0.362254	0	0	0.369268	0	0	0	0	0	0	0	0	0	0	0	0	0	0	1.2596	0	0	0	524.092	0
277	69.9284	0	64.3267	0	4.3303	0	0	0	0	0	0	0	0	0	0	0	0	0	0	0	0	0	0	0	0	0	2.27401	0.368285	5.70763	0	0	0	0	0	0	0	0	5.72666	0	0	0	0	0.147815	0.110896	3.5878	0	0	93.4141	0
278	70.1817	0	3.44696	1.4133	7.34503	0	13.6898	5.24968	0	0	1.00325	0.0596494	0	0	0	0	0	0	0	0	0	0	0	0	0	0	0	23.7485	4.31498	0	0	0	0	0	0	0	0	7.92973	0	0	0	0	4.69119	0	19.0442	0	1.78806	7.83676	0
279	70.4351	0	0	0	0	0	50.9122	0	0	0	9.85135	0	0	0	0	0	0.0767356	0	0	0	0	0	0	0	0	0	4.12672	38.7937	1.32614	0	0	0	0	0	0	0	0	100.054	0	0	30.4754	0	0	0	102.716	143.99	40.7888	0	0
280	70.6885	0	6.38138	0	0	0	0	3.36936	2.475	0	0	0	13.2183	0	0	3.09219	0	0	0	0	0	0	0	0	0	0	0	0	7.8814	0	0	0	0	0	0	0	0	9.40937	0	0	0	0	0	0	139.588	0	287.879	6.5432	0
281	70.9418	0	3.98352	1.27956	0	0	2.4901	0	0	0	0	0	0	0	0	0	0	0	0	0	0	0	0	0.335084	0	0	0	0	28.8275	0	0	0	0	0	0	0	0	0	0	0	0	0	0.296988	0	0	0	0	17.2606	0
282	71.1952	0	0	0	0	0	0	0	0.0262824	0	4.0549	0.19071	0	0	0	0	0	0	0	0	0	0	0	0	0	0	3.50067	0	16.9826	0	15.9156	0	0	0	0	0	0	17.5142	0	0	0	0	0	0	4.69811	0	0	39.2766	0
283	71.4485	0	0	0	0.629356	0	0	0	0	0	3.65649	0	0	0	0	10.2841	0	0	0	0	0	0	0	27.6287	0	0	0	0.147606	7.04145	0	0	0	0	0	0	0	0	1.56218	0	10.8263	0	3.49538	0	0	0.72677	0	2.32731	15.6986	0
284	71.7019	0	19.8802	0.34443	0	0	0	0	0	0	0	0	0	0	0	0	0	0	0	0	0	0	0	0	0	0	0	26.7479	0	0	0	0	1.28091	0	0	0	0	18.6238	0	484.387	0	0.163334	161.471	0	0	0	0	0.521172	0
285	71.9553	0	0	0	0	0	0	3.59151	0	0	0	0	0	0	0	76.6522	0	0	0	0	0	0	0	1.14625	0	0	0	0	0	0	0	0	0	0	0	0	0	0	0	0	0	1140.64	0	0	32.3095	0	0	0	0
286	72.2086	0	0	0	2.54427	2.10662	10.239	4.54425	8.09291	0	0	0	0	0	0	0	0	0	0	0	0	0	0	0	0	0	0	0	22.6651	0	0	0	0	0	0	0	0	1.06369	0	12.6902	0	0	0	22.8967	0	0	0	13.4017	0
287	72.462	0	7.08422	0	0	0	0	0	0	0	7.92805	0	0	0	0	0	0	0	21.4827	0	0	0	0	0	0	0	0	0	2.80959	0	0	1.48123	0	0	0	0	0	0.101569	0	0	0	0	0	3.61514	0	0	0	8.31476	0
288	72.7154	0	0	0	2.39702	0	0	1.95006	0	0	0	0	27.6591	0	0	9.38978	0	0	0	28.63	0	0	0	0.308525	0	0	0	3.70893	33.6746	0	0	0	0.0127603	0	0	3.77656	0	143.655	0	1575.03	0	0	96.4914	0	3.08127	0	2.36704	23.2296	0
289	72.9687	0	0	0	0	0	34.5808	0.986235	0	0	0	0	22.9553	0	0	0	0	0	0	0	0	0	0	0.559544	0	0	0	0.553552	0	0	0	0	0	0	0	0	0	1735.59	0	0	0	6.81718	0	0	0	0	193.09	71.7667	0
290	73.2221	0	1.72893	0	0	0	0	0	0	0	0	0	0	0	0	95.5168	0	0	0	0	0	0	0	6.93334	0	0	0	0	0	2.05288	0	0	3.64081	0	0	0	0	1.16987	0	756.782	0	0	0	0	0	0.00505203	0	7.46188	0
291	73.4755	0	0	0	0	0	0	1.10216	0	0	0	0	0	0	0	10.3062	0	0	24.2037	0	0	0	0	0	0	0	0	0	0	0	0	0	0	0	0	0	0	6.57463	0	6.87258	0	21.5034	5.93927	0	0	0	78.1132	1.89997	0
292	73.7288	0	3.57242	0	0	0	0	0	0	0	0.545911	0	0	0	0	23.5642	0	0	0	0	0	0	0	0	0	0	0	3.70841	8.83127	0	0	0	0	0	0	0	0	6.53921	0	0	15.5037	0	6.77017	0	0	151.506	167.129	15.8058	0
293	73.9822	0	0	0	0	0	0	6.06189	0	0	0	0	11.4378	0	0	4.82768	0	0	0	0	0	0	0	0.831031	0	0	0	0.098779	21.1687	2.22507	0	0	0	0	0	0	0	100.334	0	0	0	0	4.0666	0	0	0	0	18.3047	0
294	74.2355	0	0	0	0	0	0	0	0	0	0	0	0	0	0	57.507	0.182583	0	0	0	0	0	0	0	0	0	0	3.01775	18.5453	0	0	0	0	0	0	0	0	0	0	806.533	0	49.9947	0	0	0	0	0	28.9764	0
295	74.4889	0	6.55292	0	0	0	0	0	32.4527	0	0	0	11.8605	0	0	0	0	0	0	0	0	0	0	0	0	0	0	0	0	0	0	0	0.476915	0	0	0	0	0	0	13.1671	0	19.9223	9.87638	0	0	0	0	19.502	0
296	74.7423	0	0	0	0	0	0	0	0.0344169	0	0	0	0	0	0	8.87256	0	0	222.292	0	0	0	0	0.00039469	0	0	0	0	23.8367	2.41627	0	0	0	0	0	0	0	5.94183	0	1460.4	0	30.9702	12.0713	0	0	0	157.374	8.66406	0
297	74.9956	0	4.00847	0	0	0	0	0	0	0	0	0	0	0	0	0	0	0	0	0	0	0	0	0	0	0	0	3.7281	10.2596	0	0	0	0.0115249	0	0	0	0	5.01489	0	0	0	4.0096	17.4738	0	2.83159	0.257235	2.34608	4.29987	0
298	75.249	0	2.86667	0	0	0	0	0	0	0	0	0	13.1961	0	0	23.1533	0	0	0	0	0	0	0	1.43743	6.2376	0	0	0	7.01168	0	0	0	0	0	0	0	0	0	0	0	0	11.7988	6.03008	0.253055	0	0	0	0	0
299	75.5024	0	0	0	0	0	0	0.371071	0	0	0	0	27.144	0	0	0	0	0	0	0	0	0	0	0	5.72979	0	0	0	7.77732	0	0	0	0	0	0	0	0	10.0228	0	0	0	0	22.2411	0	0	0	0	0	0
300	75.7557	0	0	0	2.2345	0	0.602446	0	0	0	0	0	0	0	0	1.61175	0	0	0	0	1.24557	0	0	0	0	0	0	2.03985	9.0469	0	0	0	0	0	0	3.61259	0	48.0259	0	0	0	3.63289	6.66768	0	0	213.413	19.3247	0	0
301	76.0091	0	0	0	0	0	0	1.29195	41.1784	0	0	0	0	0	0	0	0	0	23.744	0	0	0	0	0	0	22.6282	0	0	9.35969	0	0	0	1.55689	0	0	0	0	0	0	801.033	0	0	0	0	0	0	108.251	0	0
302	76.2625	0	0	0.056188	0	0	0	1.28426	0	0	0	0	0	0	0	0	0	0	11.0647	0	0	0	0	0	0	0	0	0	6.43966	0	0	0	0	0	0	0	0	0	0	0	0	0	107.249	0	0	0	0	0	0
303	76.5158	0	0	0	0	0	0	0	0	0	0	0	0	0	0	0	0	0	0	0	0	31.3149	0	0	0	0	0	0	27.557	0	0	3.93633	0	0	0	2.30918	0	3.11973	0	0	0	0	0	0	0	6.32028	0.0973778	8.18054	0
304	76.7692	0	3.80042	0	0	0	0	0	0.0212185	0	0	0	0	0	0	6.53748	0	0	0	0	0	0	0	0	0	0	0	0	73.0585	0	0	0	0.0146825	0	0	0	0	107.954	0	0	0	4.37223	0	0	0	0	0.100575	0	0
305	77.0225	0	0	0	0	1.10356	0	0	0	0	0	0	0	0	0	0	0	0	0	0	0	0	0	0	0	0	0	0	11.0569	0	0	0	0	0	0	0	0	14.9568	0	0	0	0	68.3049	0	0	0	0	0.886568	0
306	77.2759	0	9.32285	0.89023	0	1.06833	0	0	3.5159	0	0	0	0	0	0	1.48569	0	0	0	0	0	0	0	0	0	0	0	0	12.1755	0	0	0	0	0	0	0	0	0	0	0	0	0	4.56474	0	0.158942	0	0	8.59967	0
307	77.5293	0	15.0871	0	0	0	0	1.89718	0	0	0	0	0	0	0	0	0	0	16.9376	0	0	0.745798	0	0	0	0	0	0	0	0	0	0	0	0	0	0	0	0.415379	0	11.9175	0	911.101	16.3202	1.62388	0	50.3673	4.0127	0.420858	0
308	77.7826	0	0	0	0	0	0	0	0	0	0.484628	0	0	0	0	31.5093	0	0	0	0	0	0	0	0	0	0	0	0	0.0141575	0	0	0	1.45337	0	0	0	0	16.6768	0	1279.41	0	0	5.38106	0	0	21.2285	0	3.1513	0
309	78.036	0	0	0	0	0	0	0	0.0268073	0	0	0	0	0	0	6.02002	0	0	0	0	0	0	0	0	0	0	0	0	0	0	0	0	0	0	0	0	0	6.59475	0	22.2468	0	396.843	0	0	0	0	0	2.57887	0
310	78.2894	0	0	0	0	0	0	10.9024	0	0	1.51634	0	0	0	0	0.152508	0	0	0	0	0	0	0	0	0	0	0	0	2.58221	0	0	0	0	0	0	0	0	20.0833	0	0	0	0	10.8419	0	0	0	185.857	4.35722	0
311	78.5427	0	2.64412	0	0	0	0	6.08887	3.22871	0	0	0	0	0	0	0	0	0	0	0	0	0	0	0	0	0	0	6.44677	0	0	0	2.74708	0.00711231	0	0	0	0	0	0	0	0	7.07917	0	0	0	0	121.014	17.5242	0
312	78.7961	0	0	0	0	0	2.22184	7.53736	0	0	7.03476	0.25403	0	0	0	0	0	0	0	0	0	0	0	0	0	0	0	0	24.3723	0	0	0	0	0	0	0	0	0	0	0	0	0	0	7.08208	0	0	0	0	0
313	79.0495	0	0	0	0	0	0	0	0.0346537	0	0	0	4.53038	0	0	0	0	0	0	0	0	0	0	0	0	0	0	0	25.7131	0	0	0	0	0	0	0	0	8.93779	0	0	0	0	0	0	3.62488	0	0	16.077	0
314	79.3028	0	0	9.58918	0	0	0	0	0	0	0	0	3.86496	0	0	0	0	0	0	0	0	0.137222	0	0	0	0	0	1.58676	34.6222	0	0	0	0.01501	0	0	0	0	0	0	0	0	0	0	0	9.29035	0	0	0	0
315	79.5562	0	60.3972	0	0	0	0	1.31196	0	0	0	0	5.54944	0	0	0	0	0	0	19.3498	0	0	0	0	0	0	0	31.9852	0	0	0	0	0	0	0	0	0	1.90064	0	0	0	14.0334	4.2994	4.51527	0	0	0	18.8883	0
316	79.8095	0	1.60021	0	0	0	0	1.06123	0	0	0	0	5.13207	0	0	0.218678	14.2156	0	0	0	0	0	0	0	0	0	0	0	0	0	0	0	0	0	0	0	0	0	0	0	0	0	0.215098	0	0	0	22.9035	16.1473	0
317	80.0629	0	0	0	0	0	0	4.77943	0.0375666	0	0	0	0	0	0	0.358248	0	0	0	0	0	0	0	0	0	0	0	0	20.1114	0	0	0	0	0	0	0	0	0	0	0	0	0	0	0	0	0	0	14.8203	0
318	80.3163	0	56.8182	0.155867	0	0	0	1.04884	0	0	7.07033	0	0	0	0	0.308549	0	0	0	0	5.33937	0	0	0	0	0	0	0	0	0	0	0	0	0	0	0	0	0	0	6.93042	0	0	10.2197	0	0	5.5057	0	65.0419	0
319	80.5696	0	8.16384	0	0	0	0	9.48393	0.0574905	0	4.9413	0	0	0	0	33.6842	0	0	0	0	0	0	0	0	0	0	0	0	0	2.73117	0	0	0	0	0	0	0	33.7327	0	2379.59	0	98.0906	4.68461	0.827747	9.76976	0	0	5.16389	1.18951
320	80.823	0	0	0	0	0	0	0	0	0	0	0	0	0	0	0	0	0	0	0	0	0	0	0	0	0	0	0	7.02501	0	0	0	0	0	0	0	0	1.53166	0	16.6641	0	0	7.81427	0	0.187564	34.1679	0	1.35779	0
321	81.0764	0	0	0.214806	2.2544	0	0	0	0	0	0	0	0	0	0	7.6493	0	0	0	21.8104	0	0	0	0	0	0	0	7.60055	10.7205	0	0	0	0	0	0	0	0	0	0	0	0	0	0	0	0	0	27.3988	13.5057	2.03288
322	81.3297	0	8.10771	0	0	0	0	0	6.45192	0	0	0	0	0	0	0.904834	0	0	0	0	0	0	0	0	0	0	0	0	9.47529	0	0	0	0	0	0	0	0	0	0	0	0	6.25288	5.46054	0	8.40884	0	0	14.4524	0
323	81.5831	0	0	0	0	0	0	0	1.64515	0	0	0	0	0	0	0	18.8984	0	0	0	0	0	0	0	0	0	0	13.697	1.27604	0	0	2.29216	2.25651	0	0	0	0	6.45426	0	21.2169	0	0	2.28997	0	0	10.0832	0	4.47016	0
324	81.8365	0	1.6026	6.21283	0	0	0	5.04594	0	0	10.1221	0	0	0	0	0.09424	0	0	0	0	1.09502	0	0	0	0	0	0	0	41.504	0	0	0	0	0	0	7.58214	0	0.373912	0	45.2869	0	0.0674288	0	0	6.4511	0	0	25.8016	0
325	82.0898	0	0	0	0	0	0	0	55.7341	0	0	0	0	0	0	0	0	0	0	0	0	0	0	0	0	0	0	0	0	0	0	0	0.0300438	0	0	0	0	1.6957	0	21.9603	0	0	0	0	0.265425	0	0	0	0
326	82.3432	0	19.2433	6.46673	0	0	0	6.58148	0	0	0	0	0	0	0	0	0	0	0	0	0	0	0	0	0	0	0	6.09119	0	0	0	0	0	0	0	0	0	0	0	75.7771	0	0	0	0	1.50602	0	0.375847	0	0
327	82.5965	0	9.92639	0	0	0	0	6.59936	0	0	0	0	0	0	0	0	0	0	12.3784	0	0	0	0	0	0	0	0	0	0	0	0	0	0	0	0	0	0	165.032	0.315495	53.0331	0	0	0	0	0	0	2.65435	5.08716	0
328	82.8499	0	49.156	0	0	0	0	6.27256	59.548	0	0	0	0	0	0	0.450171	0	0	0	0	0	0	0	0.222621	0	0	0	0	0	0	0	0	0	0	0	0	0	18.7975	0	2301.93	0	0	0.339038	0	0	0	2.64088	0	0
329	83.1033	0	6.55911	0	0	0	0	0	0	0	0	0	0	0	0	0	0	0	0	0	0	0	0	0	0	0.193276	0	0	0	2.33838	0	0	0	0	0	0	0	0	0	15.4965	0	5.5609	16.6533	0	0	0	13.5433	0	0
330	83.3566	0	0	0	0	0.33716	0	4.63743	0	0	0	0	0	0	0	0	0	0	0	0	0	0	0	5.88497	0	0	0	0	0	0	0	0	0	0	0	0	0	28.7544	0	2187.14	0	0	0	0	2.8574	0	0	44.0545	0
331	83.61	0	0	0	0	0	0	0	0	0	0	0	0	0	0	1.37002	0	0	0	0	0	0	0	0	0	0	0	0	0	0	0	0	0	0	0	0	0	0	0	68.2904	0	0	0	0	0	0	336.165	0.556919	0
332	83.8634	0	71.4253	0	0	0	0	0	59.2508	0	0	0	0	0	0	0	0	0	0	0	0	0	0	829.391	0	0	0	0	24.1378	0	0	0	0	0	0	0	0	0	0	17.4617	0	0	0	0	0	0	0.39409	3.67143	0
333	84.1167	0	1.21377	0.497964	0	0	0	0	0	0	0	0	0	0	0	0	0	0	42.4108	0	0	0	0	903.64	0	0	0	0	0.981021	0	0	0	0.0138378	0	0	0	0	19.6903	0	74.8755	0	0	0	0	0	7.68759	0	0	0
334	84.3701	0	12.3803	0	0	0	0	0	0	0	0	0	4.23255	0	0	0	0	0	0	0	0	0	0	0	0	0	0	0	0	0	0	0	0	0	0	0	0	20.7864	0	0	0	0	0	0	0	0	0	0.0512978	0
335	84.6235	0	15.5408	0	0	0	0	0	0	0	0	0	0	0	0	0	0	0	0	0	0	0	0	0	0	0	0	0	0	0	0	0	0.0146351	0	0	0	0	41.6584	0	0	0	0	0	0	0	0	165.546	1.84436	0
336	84.8768	0	22.1382	0	0	0	0	2.13909	0	0	1.3562	0	0	0	0	0	0	0	0	0	0	0	0	0	0	1.16467	0	0.45126	0	0	0	0	0.0167309	0	0	0	0	0	0	0	0	0	0.658583	0	0.893419	9.11469	0	29.0818	0
337	85.1302	0	10.2865	0	0	0	0	0	0	0	0	0	0	0	0	0	0	0	0	0	0	0	0	0	0	0	0	0	13.2697	0	0	0	0	0	0	0	0	0	0	75.9341	0	0	21.3753	0	0	0	1.24823	0	0
338	85.3835	0	10.8885	0	0	0	0	0	0	0	0	0	0	0	0	0	0	0	0	0	0	0	0	0	0	0	0	0	0.419074	0	0	0	0	0	0	0	0	0	0	1997.1	0	0	0	0	28.5966	0	0	18.8397	0
339	85.6369	0	34.7473	0	0	0	0	0.952627	0	0	0	0	0	0	0	0.441263	0	0	0	0	0	0	0	0	0	0	0	0	2.71859	0	0	0	0	0	0	0	0	0.16453	0	18.3218	0	0	0	0	0	0	0.0401241	53.0025	0
340	85.8903	0	1.25938	0	0	0	0	0	0	0	0.740382	0	0	0	0	17.7156	0	0	0	0	0	0	0	0	8.21865	0	0	0	8.27336	0	0	0	0	0	0	0	0	0	0	0	0	0	0	0	0	0	0	56.5571	0
341	86.1436	0	0	0	0	0	0	0	0	0	0	0	0	0	0	0	0	0	0	0	0	0	0	966.141	0	0	0	0	0	0	0	0	0	0	0	0	0	0	0	0	0	1.25409	0	0	21.393	23.9729	0	2.31485	0
342	86.397	0	9.29075	0	1.65487	0	0	0	0.0187438	0	3.74673	0	0	0	0	9.0274	0	0	0	7.17198	0	0	0	0	0	0	0	0	47.0843	0	0	0	4.53787	0	0	0	0	109.178	0	0	0	0	0	0	0	0	0	0	0
343	86.6504	0	0	0	0	0	0	2.06552	0	0	0	0	0	0	0	0	0	0	0	10.5192	0	0	0	0	7.88061	0	0	0	23.3651	0	0	0	0	0	0	0	0	0.533916	0	44.3703	0	1.9186	0.0521859	10.428	0	0	0	0.89505	0
344	86.9037	0	4.73944	0	0	1.40518	0	0	0	0	0	0	0	0	0	0	0	0	0	0	0	0	0	0	0	0	0	0	0.455046	0	0	0	0	0	0	0	0	0	0	0	0	0	0	0	0	0	0	0	0
345	87.1571	0	19.8421	0	0	0	0	0	0	0	0	0	0	0	0	0	0	0	0	0	0	0	0	0	0	0	0	0	1.62694	0	0	0	0	0	0	0	0	0	0	18.7641	0	0	0	0	56.359	0	230.757	0	0
346	87.4105	0	2.36159	0	0	0	0	2.8912	0	0	0	0	0	0	0	0	0	0	0	0	0	0	0	0	0	0	0	0	31.8777	0	0	0	0	0	0	0	0	0	0	0	0	0	0	0	0.302423	0	0	53.8452	0
347	87.6638	0	0	0	0	0	0	0	0	0	0	0	0	0	0	11.5368	0	0	0	0	0	0	0	0	0	0	0	0	10.6715	0	0	0	0	0	0	0	0	14.1941	0	52.3095	0	0	0	0	0	0	0	78.3062	0
348	87.9172	0	0	0	0	0	0	0	0	0	0	0	0	0	0	0	0	0	0	0	0	0	0	0	0	0	0	0	0	0	0	0	0	0	0	0	0	0	0	0	0	0	11.2268	0	0	0	0	57.2082	0
349	88.1705	0	12.0366	0	0	0	0	0	0	0	0	0	0	0	0	0	0	0	0	0	0	0	0	0	0	0	0	0	0	0	0	0	0	0	0	0	0	0	0	0	0	0	0	0	55.3298	0	0	0	0
350	88.4239	0	11.683	0	0	0	1.38929	2.35975	0	0	0	0	0	0	0	5.86361	0	0	0	0	2.86448	0	0	0	0	0	0	0	3.60901	0	0	0	264.391	0	0	0	0	0	0	13.7969	0	0	0	0	0	0.305071	195.242	0	0
351	88.6773	0	0.10243	0.897883	0	0	0	0.812011	0	0	0	0	0	0	0	0	0	0	0	0	0	0	0	0.0163086	0	0	0	0	0	0	0	0	0	0	0	0	0	0.784	0	3.45464	0	1.90766	0	5.2973	0	0	0	0	0
352	88.9306	0	6.91034	0	0	0	0	0	12.1077	0	0	0	0	0	0	0	0	0	0	0	0	0	0	0	0	0	0	0	24.5947	0	0	0	1.70239	0	0	0	0	0	0	0	0	0	0	0	0	0	0	0	0
353	89.184	0	0	0	0	0	0	2.44882	0	0	0.686255	0	0	0	0	0	0	0	0	0	0	0	0	0	0	0	0	0	0	0	0	0	0	0	0	0	0	0	0	0	0	7844.24	7.47414	6.94888	35.133	0	18.9238	1.22943	0
354	89.4374	0	2.99199	0	0	0	0	0.644051	0.123506	0	0	0	0	0	0	0	0	0	0	0	0	0	0	0	9.64871	0	0	0	0	0	0	0	0	0	0	0	0	0	0	24.6481	0	0	0	0	42.1071	0	0	0	0
355	89.6907	0	0	0	0	0	22.3246	2.56677	0	0	0	0	0	0	0	0	0	0	0	0	0	0	0	0	9.25266	0	0	0	21.8974	0	0	0	0	0	0	0	0	15.9822	0	109.462	0	0	3.93114	0	141.376	0	17.0923	79.3841	0
356	89.9441	0	0	0	0	0	0	0	0	0	0.813136	0	0	0	0	0	0	0	0	0	0	0	0	0	0	0	0	0	0	0	0	0	0	0	0	0	0	0	0	28.249	0	0	0	0	35.5494	0	0	1.43689	0
357	90.1975	0	0	0	0	0	0	0	0.0321948	0	31.7638	0	0	0	0	0.252503	0	0	0	0	0	0	0	0	0	0	0	0	0	0	0	0	0	0	0	0	0	0	0	53.8576	0	0.960927	8.31706	18.2561	0	0	0	0	0
358	90.4508	0	50.5817	11.13	0	0	0	0	0	0	0.377011	0	0	0	0	0	0	0	0	0	0	0	0	0	0	0	0	0	0	0	0	0	0.0105856	0	0	0	0	0	0	61.7372	0	0	0	0	0	0	0	96.939	0
359	90.7042	0	0	0	0	0	0	1.70968	0	0	19.8941	0	4.17478	0	0	0	0	0	0	0	0	0	0	0	0	0	0	0	1.59391	0	0	0	0	0	0	0	0	0	0	62.588	0	0	0	0	0	0	0	0	0
360	90.9575	0	17.3094	0	0	0	22.5993	1.70572	0	0	0	0	6.2132	0	0	0	0	0	0	0	0	0	0	0	0	0	0	0	23.0331	0	0	0	0	0	0	0	0	0	0	0	0	0	1.32484	0	38.07	160.775	0	51.0875	0
361	91.2109	0	52.7018	0	0	0	0	0	0	0	0.510286	0	0	0	0	0	0	0	0	0	0	0	0	0	0	0	3.59842	0	0	0	0	0	0	0	0	0	0	0	0	0	0	0	0	9.10056	459.171	0	31.6468	13.6139	0
362	91.4643	0	0	0	0	0	0	1.08679	0	0	0	0	0	0	0	0	0	0	0	0	0	0	0	0	0	0	0	0	0.373144	0	0	0	0	0	0	0	0	4.99327	0	0	0	0	0	0	82.9937	0.00780301	0	167.763	0
363	91.7176	0	36.2241	0	0	0	0	1.64745	0	0	0	0	0	0	0	4.23199	0	0	0	0	0	0	0	0	0	0	0	0	0	0	0	0	0	0	0	0	0	0	0	0	0	0	0	0	130.09	0	0	0	0
364	91.971	0	0	4.67611	0	0	0	2.23623	0	0	0	0	0	0	0	0	0	0	0	0	0	0	0	0	0	0	0	0	0	0	0	0	0	0	0	0	0	0	0	0	0	0	0	0	136.219	0	0	249.21	0
365	92.2244	0	28.422	0	0	0	0	1.67843	0	0	0	0	5.29447	0	0	0.137052	0	0	0	0	0	0	0	0	0	0	0	0	8.12887	0	0	0	0	0	0	0	0	0	0	36.8243	0	14.509	0	0	0	0	0	0	0
366	92.4777	0	29.139	0	0	0	0	0	0	0	0.277558	0	0	0	0	0	0	0	0	0	0	0	0	0	0	0	0	0	0	0	0	0	0	0	0	0	0	0	0	0	0	0	0.209032	0	0	22.4478	0	0	0
367	92.7311	0	12.8978	0	0	0	0	0	0	0	0	0	0	0	0	35.834	0	0	0	0	0	0	0	0.0403373	0	0	0	0	11.2806	0	0	0	0	0	0	0	0	0	0	37.8386	0	0	0.223023	8.27231	0	6.58739	0	7.91291	0
368	92.9845	0	38.4419	0	0	0	0	2.20939	0	0	0.41845	0	0	0	0	0	0	0	0	0	0	0	0	0	0	0	0	0	0	0	0	2.4746	0	0	0	0	0	0	0	0	0	0	0	0	28.7218	0	0.0680169	18.763	0
369	93.2378	0	10.6331	0	0	0	0	0.593747	0	0	0	0	0	0	0	0	0	0	0	0	0	0	0	0	0	0	0	0.406294	0.812773	0	0	0	0.0187596	0	0	0	0	0	0	0	0	400.977	0	0	104.789	0	0	0	0
370	93.4912	0	0	0	0	0	0	1.99071	0	0	1.62219	0	0	0	0	0	0	0	0	0	0	0	0	0	0	0	0	0	14.8488	0	0	0	0	0	0	0	0	0.137644	0	0	0	2.28332	0	0	90.2256	0	0	99.4314	0
371	93.7445	0	14.86	0	0	0	0	1.053	0	0	0	0	0	0	0	0	0	0	0	0	0	0	0	0	0	0	0	0	3.74189	0	0	0	3.85772	15.5008	0	0	0	4.86984	0	0	0	0	0.365521	0	374.781	0	0	0	0
372	93.9979	0	30.2518	0	0	0	0	0	0	0	0	0	0	0	0	0	0	0	0	0	0	0	0	0	0	0	0	0	0	0	0	0	0	0	0	0	0	0	0	0	0	0	0	0	0	0	15.1076	0	0
373	94.2513	0	29.985	5.3911	0	0	0	0	0	0	0	0	0	0	0	0	0	0	0	0	0	0	0	0	0	0	0	0	0	0	0	0	0	0	0	0	0	0	0	23.1715	0	0	0	12.9187	0	0	0	0	0
374	94.5046	0	17.5109	0	0	0	0	0	0	0	0	0	0	0	0	0	0	0	0	0	0	0	0	0	8.62296	0	0	0	2.08502	0	0	0	0	0	0	0	0	3.39587	0	29.3713	0	3.81438	0	0	0	0	3.93593	0	0
375	94.758	0	0	0	0	0.284145	0	0	0	0	0	0	0	0	0	0	0	0	0	0	0	0	0	0	0	0	0	0	0	0	0	0	0	0	0	0	0	0	0	0	0	0	0	0	25.0918	0	0	0	0
376	95.0114	0	4.54894	0	0	0	0	0.590744	0	0	0	0	0	0	0	0	0	0	0	0	0	0	0	0	0	0	0	0	0	0	0	0	0	0	0	0	0	0.125764	0	0	0	0	0	0	174.368	0	0	0	0
377	95.2647	0	18.7195	8.37173	0	0	0	0	0	0	0	0	0	0	0	0	0	0	0	0	0	0	0	0	0	0	0	0	0	0	0	0	0	0	0	0	0	0	0	22.3807	0	0	0	0	0	0	16.7968	16.333	0
378	95.5181	0	2.30032	0	0	0	0	0	0	0	0	0	0	0	0	0	0	0	0	0	0	0	0	0	0	0	0	0	1.16373	0	0	0	277.833	0	0	0	0	0	0	30.6834	0	0	0	0.0326724	0	0	0	3.16481	0
379	95.7715	0	0	0	0	0	0	0	0.646766	0	2.1843	0	0	0	0	0	0	0	0	1.38204	0	0	0	0	0	0	0	0	0	0	0	0	0	0	0	0	0	0	0	0	0	0	0	0	142.672	0	40.8777	0	0
380	96.0248	0	0	0	0	0	0	0	0	0	0	0	0	0	0	0	0	0	0	0	0	0	1.59022	0	0	0	0	1.7497	0.0552723	0	2.52264	0	2.38357	0	0	0	0	7.44777	0	0	0	0	0	0	116.994	0	0	10.7616	0
381	96.2782	0	1.46662	0.66815	0	0	0	0	0	0	0	0	0	0	0	0	0	0	0	0	0	0	0	0	0	0	0	0	0	0	0	0	0	0	0	0	0	0	0	5.91224	0	0	0	0	0	0	0	115.939	0
382	96.5315	0	22.0441	0	0	0	0	0	0	0	0	0	4.19998	0	0	0	0	0	0	0	0	0	0	0	0	0	14.5068	0	4.90159	0	0	0	0	0	0	0	0	4.18941	0	0	0	27.6727	0	0	0	0	0	0	0
383	96.7849	0	0	0	0	0	0	0.422034	0	0	0	0	0	0	0	0	0	0	0	0	0	0	0	0	0	0	0	0.718256	0	0	0	0	0.785057	0	0	0	0	0	0	11.1376	0	0	0.773347	0	0	0	0.148269	0	0
384	97.0383	0	0	0	0	0	0	0	0	0	0	0	0	0	0	0	0	0	0	0	0	0	0	0	0	0	0.755803	0	0	0	0	0	0	0	0	0	0	0	0	0	0	0	1.34252	0	0	0	0.8378	1.68732	0
385	97.2916	0	1.67687	0	0	0	0	0	265.981	0	0	0	0	0	0	12.3215	0	0	0	0	0	0	0	0	0	0	0	0	0	0	0	0	0	0	0	0	0	0	0	0	0	0	0	0	0	0	0	2.28425	0
386	97.545	0	0.625899	0	0	0	0	0	0	0	0	0	0	0	0	0	0	0	0	0	0	0	2.43625	0	0	0	0	0	0	0	0	0	0	0	0	0	0	6.54115	0	0	0	0	0	0	18.7985	0	0	0	0
387	97.7984	0	0	0	0	0	0	0	0	0	0	0	0	0	0	0	0	0	0	0	0	0	0	0	0	0	0	0	0	0	0	0	0	0	0	0	0	15.9938	0	0	0	0	0	0	335.408	0	0	8.20827	0
388	98.0517	0	0	0	0	0	0	0	0	0	0	0	0	0	0	0	0	0	0	0	0	0	0	0	0	0	0	0	5.90133	0	0	5.94127	0	0	0	0	0	0	0	0	0	0	1.92072	12.9839	1.78932	0	0	0	0
389	98.3051	0	0	4.75522	0	0	0	0	0	0	0	0	0	0	0	0	0	0	0	0	0	0	0	0	0	0	0	0	13.443	0	0	0	0	0	0	0	0	0	0	0	0	0	0	0	0	0	0	0	0
390	98.5585	0	0	0	0	0	0	0	0	0	0	0	0	0	0	0	0	0	0	0	0	0	0	0	0	0	0	0	0	0	0	0	0	0	0	0	0	0	0	0	0	0	0	0	0	0	0	1.29534	0
391	98.8118	0	0	0.885537	0	0	0	0.42855	0.0269376	0	0	0	0	0	0	0	0	0	0	0	0	0	0	0	0	0	0	0	0	0	0	0	0.0097962	0	0	0	0	0	0	0	0	0	0	0	0	0	0	2.78264	0
392	99.0652	0	0	0	0	0.044071	0	0	0	0	0	0	0	0	0	0	0	0	0	0	0	0	0	6.23295	0	0	0	0	0	0	0	0	0	0	0	0	0	79.3231	0	0	0	0	0	0	46.4595	0	0	1.39423	0
393	99.3185	0	0	0.147878	0	0	0	0	0	0	0.680532	0	0	0	0	8.68436	0	0	0	0	0	0	0	0	0	0	13.2267	0	0	0	0	0	0	0	0	0	0	0	0	0	0	0	0	0	1.6032	0	0	0	0
394	99.5719	0	0	0	0	0	0	0.826737	0	0	0.947819	0	0	0	0	0.141327	0	0	0	0	0	0	0	0	0	0	0	0	0	0	0	0	0.00939756	0	0	0	0	0	0	0	0	531.137	0	0	0	0	0	8.85953	0
395	99.8253	0	0	0	0	0	0	0	0	0	2.39436	0	0	0	0	0	0	0	0	0	0	0	0	0	0	0	0	0	0	0	0	0	0	0	0	0	0	2.48215	0	0	0	0	0	45.6593	270.743	0	0	0	0
396	100.079	0	0	0	0	0	0	4.33494	0	0	0	0	0	0	0	0	0	0	0	0	0	0	0	0	0	0	0	0	4.23672	0	0	0	0	0	0	0	0	777.601	0	0	0	0	0	0	0	0	0	0.974362	0
397	100.332	0	0	0	0	0	0	0.407454	0	0	0	0	0	0	0	0	0	0	0	0	0	0	2.43625	0	0	0	0	0	0	0	0	0	0	0	0	0	0	618.247	0	0	0	0	52.5725	0	0	0	0	0	0
398	100.585	0	0	1.02143	0	0	0	0	0	0	0	0	0	0	0	0.0705231	0	0	0	0	0	0	0	0	0	0	0	1.87212	0	0	0	0	0	0	0	0	0	900.275	0	0	0	0	0	32.9874	0	0	0	0	0
399	100.839	0	0	0	0	0	0	0	0	0	0	0	0	0	0	0	0	0	0	0	0	0	0	0	0	0	0	0	7.94812	0	0	0	0	0	0	0	0	0	0	0	0	0	0	0	0	0	0	0	0
400	101.092	0	0	0	0	0	0	0	0	0	0.214376	0	0	0	0.300004	0	0	0	0	0	0	0	0	0	0	0	0	0	4.60454	0	0	0	0	0	0	0	0	995.584	0	0	0	0	0	36.9364	8.55761	0	0	12.995	0
401	101.345	0	0	0	0	0	0	0.399667	0	0	0	0	0	0	0	1.11993	0	0	0	0	0	0	0	0	0	0	0	0	0	0	0	0	0	0	0	0	0	1693.2	0	0	0	0	0	11.9497	0	0	0	0	0
402	101.599	0	0	0	0	0	0	0	0	0	0	0	0	0	0	0	0	0	0	0	0	0	0	0	0	0	8.05562	1.72914	15.2398	0	0	2.35008	0	0	0	0	0	302.304	0	0	0	0	0	0.157418	0	0	0	134.896	0
403	101.852	0	0	7.53208	0	0	2.92621	0	0	0	0	0	0	0	0	0.440643	0	0	0	0	0	0	0	0	0	0	0	0	4.44729	0	0	0	0	13.8226	0	0	0	225.755	0	6.89537	0	0	0	0	0	0	0	1.79636	1.76076
404	102.106	0	0	0	0	0	0	0	0	0	0	0	0	0	0	0	0	0	0	0	0	0	0	0	0	0	0	0	5.247	0	0	0	0	0	0	0	0	1907.2	0	0	0	0	0	0	0	60.7004	0	6.61508	0
405	102.359	0	0	0	0	0	0	0	3.09014	0	0	0	0	0	0	0	0	0	0	0	0	0	0	0.485772	0	0	0	0	0	0	0	3.20533	0	0	0	0	0	0	0	0	0	90.1645	0.09201	15.5824	0	0.0692088	0	0	0
406	102.612	0	0	0	0	0	0	0	0	0	0	0	0	0	0	0	0	0	0	0	0	0	0	0	0	0	0	0	0	0	0	0	0	0	0	0	0	0	0	0	0	0	0	36.7725	0	0	0	0	0
407	102.866	0	0	0	0	0	0	1.90288	2.32477	0	0.566569	0	0	0	0	0	0	0	0	0	0	0	0	0	0	0	0	0	3.12015	0	0	0	52.9901	0	0	0	0	0	0	0	0	0	0	0	0	0	0	0	0
408	103.119	0	0	0	0	0	0	0	0	0	0	0	0	0	0	1.16123	0	0	0	0	0	0	0	0	0	0	0	0	0	0	0	0	0	0	0	0	0	0.824929	0	0	0	0	0.0992408	10.5672	0	0	0	0	0
409	103.372	0	0	8.60313	0	3.61187	0	0	0	0	0	0	0	0	0	3.30641	0	0	0	0	0	0	0	0	0	0	0	0	21.0797	0	0	0	0	0	0	0	0	0	0	0	0	0	0	0	0.355347	0	0	1.29936	0
410	103.626	0	0	0	0	0	0	0	0	0	0	0	0	0	0	0	0	0	0	0	0	0	0	0	0	0	0	1.15931	0	0	0	0	0	0	0	0	0	0	0	27.9136	0	0	0	0	0	0.180318	0	0	0
411	103.879	0	0	0	0	0	0	0	0	0	0	0	0	0	0	0.0410635	0	0	0	0	0	0	0	0	0	0	0	0	0	0	0	7.03126	0	0	0	0	0	0	0	0	0	28.6256	0	0	0	16.476	0	151.937	0
412	104.132	0	0	0	0	0	0	1.04165	0	0	0	0	0	0	0	0	0	0	0	0	0	0	0	0	0	0	0	0	0.303674	0	0	0	0	0	0	0	0	0	0	9.60256	0	0	0	0	25.4842	0	0	0	0
413	104.386	0	0	0	0	37.3892	0	0	0	0	0	0	0	0	0	0	0	0	0	0	0	0	0	0	0	0	0	0	0	0	0	6.35739	0	0	0	0	0	0	0	0	0	72.3753	0	0	1.49529	0	0	0.316107	0
414	104.639	0	0	0	0	0	0	0.557495	0	0	0	0	0	0	0	0.152603	0	0	0	0	0	0	0	0	0	0	0	0	0	0	0	0	0	0	0	0	0	592.512	0	0	0	0	0	0	0	0	5.46565	4.57925	0
415	104.893	0	0	0	0	3.30895	0	0	0	0	0	0	0	0	0	0	0	0	0	0	0	0	0	0	0	0	0	0	0	0	0	0	0	0	0	0	0	303.891	0	34.0553	0	0	0	0	0	0.811975	0	0	0
416	105.146	0	0	0	0	0	0	0	0	0	0	0	0	0	0	2.12063	0	0	0	0	0	0	0	0	0	0	7.48654	0	0	0	0	0	0	0	0	0	0	0	0	0	0	0	0	17.1319	0	0	0	0	0
417	105.399	0	0	0	0	20.4229	0	0	7.97651	0	0	0	0	0	0	10.1945	0	0	0	0	0	0	0	0	0	0	0	0	0	0	0	0	0	0	0	0	0	0	0	0	0	0	0	2.9786	0.353524	12999.1	0	0	0
418	105.653	0	0	0	0	0	0	0	0	0	0	0	0	0	0	0	0	0	0	0	0	0	0	0	0	0	0	0	10.1677	0	0	0	0	0	0	0	0	0	0	38.6175	0	0.089563	0	0	0.506853	0	0	0	0
419	105.906	0	0	0	0	0	3.34083	0	0	0	0	0	0	0	0	0	0	0	0	0	0	0.132391	0	0	0	0	0	0	0	0	0	0	0	0	0	0	0	1628.91	70.1383	0	0	0	0	0	96.4282	0	0	14.0394	0
420	106.159	0	0	0	0	0	0	0	0	0	0	0	0	0	0	0	0	0	0	0	0	0	0	0	0	0	0.00867133	0	0	0	0	0	0	0	0	0	0	0	0	0	0	12.8316	0	0	0.176734	0	0	103.832	0
421	106.413	0	0	0	0	6.48848	0	0	0	0	0	0	0	0	0	0	0	0	0	0	0	0	0	0	0	0	0	0	0	0	0	0	0	0	0	0	0	11.599	0	0	0	0	0	18.6186	0	0	0	0	0
422	106.666	0	0	29.1956	0	0	0	0	0	0	0	0	0	0	0	0	0	0	0	0	0	0	0	0	0	0	0	0	0	0.985366	0	0	0	0	0	0	0	396.599	0	0	0	0	0	0	0	0	0	0	0
423	106.919	0	0	0	0	0	0	0	0	0	0	0	0	0	0	0	0	0	0	0	0	0	0	0	0	0	0	0	14.5191	0	0	3.06129	0	0	0	0	0	82.8646	0	0	0	0	0.134096	0	285.589	0	0	0	0
424	107.173	0	0	0	0	0	0	0	0	0	0	0	0	0	0	0	0	0	0	0	0	0	0	0	0	0	0	0	0	0	0	0	0	0	0	0	0	0	0	0	0	645.059	0	0	0	0	0	7.17572	0
425	107.426	0	0	0	0	0	0	0	0	0	0.395668	0	0	0	0	0	0	0	0	0	0	0	0	0	0	0	0	0	5.58179	0	0	0	0	0	0	0	0	0	0	45.201	0	0	0	0	0	0	0	0	0
426	107.68	0	0	0	0	0	0	0	0.0237998	0	0	0	0	0	0	0	0	0	0	0	0	0	0	0	0	0	0	0	0	0	1.35846	0	0	0	0	0	0	0	0	0	0	0	0	6.80689	0	0	0	0	2.02601
427	107.933	0	0.453668	12.266	0	0	0	0	0	0	0	0	0	0	0	0	0	0	0	0	0	0	0	0	0	0	0	0	0	0	0	0	0	0	0	6.17623	0	0	58.3579	0	0	26.8586	0	0	0	0	0	0	0
428	108.186	0	0	0	2.52845	0	0	0	0	0	0	0	0	0	0	0	0	0	0	0	0	0	0	0	0	0	0	0	0.654076	0	0	0	0	0	0	0	0	0	0	0	0	0	0	0	0	0	22.7368	149.062	11.342
429	108.44	0	0	0	0	0	0	0	0	0	0	0	0	0	0	0	0	0	0	0	0	0	0	0.168694	0	0	0	0	0	0	0	1.43322	0	0	0	0	0	13.6121	0.0273954	38.8941	0	0	0	0	0	0	9368.42	0	0
430	108.693	0	0	0	0	0	0	0	0	0	0	0	0	0	0	0	0	0	0	0	0	0	0	0	0	0	0	0	0	0	0	0	0	0	0	0	0	70.8334	0	0	0	9.2326	0	0	0	0	0	0	0
431	108.946	0	0	0	0	0	0	0	0	0	0	0	0	0	0	0	0	0	0	0	0	0	0	0	0	0	0	0.835136	0	0	0	0	0	0	0	0	0	1.04401	0	0	0	0	0	0	0	0	0	11.8551	0
432	109.2	0	0	0	0	0	0	0	0.0275414	0	0	0	0	0	0	0.0360391	0	0	0	0	0	0	0	0	0	0	0	0	0	0	0	0	0	0	0	0	0	0.557996	0	0	0	352.703	0	0	215.667	0	0	0	0
433	109.453	0	0	0	0	0	0	0	0	0	0	0	0	0	0	0.559366	0	0	0	0	0	0	0	0	0	0	0	0	0	0	0	0	0	0	0	0	0	0	0	0	0	0	0	0	0	0	0	0	0
434	109.706	0	0	0	0	0	0	0	0	0	0	0	0	0	0	10.878	0	0	0	0	0	0	0	0	0	0	0	0	0	0	0	25.1166	0	0	0	0	0	0	0	0	0	0	0	0	378.689	0	0	0	0
435	109.96	0	0	0	0	0	0	0	0	0	0	0	0	0	0	0.956621	0	0	0	0	0	0	0	0.0191464	0	0	0	0	0	0	0	0	0	0	0	0	0	0	0	0	0	0	0	0	0	0	0	0	0
436	110.213	0	0	0	0	0	0	0	0	0	0	0	0	0	0	0	0	0	0	0	0	0	0	0	0	0	0	0	9.10398	0	0	0	0	0	0	0	0	0.564398	30.7259	0	0	0	0	0	0	0	0	76.2907	0
437	110.467	0	0	0	0	0	0	0	0	0	0	0	0	0	0	0.0621755	0	0	32.2167	0	0	0	0	0	0	0	0	0	12.4923	0	0	0	0.0126814	0	0	0	0	0	0	27.0041	0	0	48.4748	0	0	0	0	0	0
438	110.72	0	0	0	0	0	0	0	0	0	0	0	0	0	0	0	0	0	0	0	0	0	0	0	0	0	0	0	0	0	0	18.6112	0	0	0	0	0	0	0	0	0	0	0	0	0	0	0	0	0
439	110.973	0	0	0	0	0	0	0	0	0	0	0	0	0	0	0	0	0	47.5924	0	0	0	0	0	0	0	0	1.8952	0	0	0	0	0	0	0	0	0	0	0	0	0	0	0	0	0	0	0	22.5488	0
440	111.227	0	0	0	0	0	7.54221	0	0	0	0	0	0	0	0	0	0	0	0	0	0	0	0	0	0	0	0	0	0	0	0	0	0	0	0	0	0	0	0	0	0	0	0	0	0	0	0	0	0
441	111.48	0	0	0	0	0	0	0	0	0	0	0	0	0	0	0	0	0	0	0	0	0	0	0	0	0	0	0	0	0	0	0	0	0	0	0	0	0	0	0	0	64.7019	0	0	0	0	0	0	0
442	111.733	0	0	0	0	0	0	0	0	0	0	0	0	0	0	0	0	0	0	0	0	0	0	0	0	0	0	1.00643	20.793	0	0	0	0	0	0	0	0	4.62944	0	0	0	0	0	0	0	0	0	2.89595	0
443	111.987	0	0	0	0	0	0	0	0	0	0	0	0	0	0	0	0	0	0	0	0	0	0	0	0	0	0	0	0.080347	0	0	0	0	0	0	0	0	0	0	0	0	0.0483889	0	0	0	0	24.5224	0	0
444	112.24	0	0	0	0	24.7918	0	0	0	0	0	0	0	0	0	0.241941	0	0	0	0	0	9.21708	0	0	0	0	0	0	0	0	0	0	0	0	0	0	0	0.426052	0	0	0	3.31365	0	0	0	0	0	0	0
445	112.493	0	0	0	0	0	0.0121288	0	0	0	0	0	0	0	0	0	0	0	0	0	0	0	0	0	0	0	0	0	2.05786	0	0	0	0	0	0	0	0	0	0	0	0	0	0	0	0	0	13.4028	11.2322	0
446	112.747	0	0	0	0	0	0	0	0	0	0	0	0	0	0	0	0	0	0	0	0	0	0	0	0	0	0	0	0	0	0	0	0	0	0	0.0958425	0	0	0	0	0	0	0	0	0	0	0	0	0
447	113	0	0	0	0	0	0	0	0	0	0.238207	0	0	0	0	0	0	0	0	0	0	0	0	0.170273	0	0	0	0	0	0	0	0	0	0	0	0	0	0.282641	20.0323	0	0	34.2741	8.25271	0	0	0	27.5396	16.8815	0
448	113.254	0	0	0	0	0	0	0	0	0	0.465075	0	0	0	0	0.0225013	0	0	0	0	0	0	0	0	0	0	0	0	0	0	0	0	0	0	0	0	0	0	0	0	0	0	47.8475	0	0	0	0	0	0
449	113.507	0	0	0	0	1.98676	0	0	0	0	0	0	0	0	0	0.192482	0	0	0	0	0	0	0	0	0	0	0	0	3.61349	0	0	0	0	0	0	0	0	0	0	0	0	0	0.137849	0	0	0	0	0	0
450	113.76	0	0	0	0	0	0	0	0	0	0	0	0	0	0	0	0	0	0	0	0	0	0	0	0	0.901282	0	0.224539	0	0	0	0	0	0	0	0	0	0	0	24.2796	0	0	61.5596	0	0	0	0	3.20779	0
451	114.014	0	0	0	0	0	0	0	0	0	0	0	0	0	0	0	0	0	0	0	0	0	0	0	0	0	0	0	0	0	0	0	0	0	0	0	0	0	0	0	0	0	10.1756	0	0	0	0	0	0
452	114.267	0	0	0	0	0	0	0	0	0	0	0	0	0	0	0	0	0	0	0	0	0	0	0	0	1.03438	0	0	0	0	0	0	0	0	0	0	0	0	54.6322	0	0	0	8.21003	0	0	0	0	2.22696	0
453	114.52	0	0	0	0	0	0	7.20552	0	0	0	0	0	0	0	0	0	0	0	1.95901	0	0	0	0	0	0	0	0	0	0	0	0	0	0	0	0	0	0.819119	0	0	0	0	1.48779	0	0	0	0	0	0
454	114.774	0	0	0	0	5.23101	0	0	0	0	0	0	0	0	0	0	0	0	0	0	0	0	0	0	0	0	0	0	0	0	0	0	0	0	0	0	0	0	0	0	0	0	0	0	0	0	0	0	0
455	115.027	0	0.918218	0	0	0	0	0	0	0	0	0	0	0	0	0	0	0	0	0	0	0	0	0	0	0	0	1.24444	0.558778	0	0	0	0	0	0	0	0	0	0	0	0	0	0	0	0	0	0	0	0
456	115.28	0	0	0	0	0	0	0	0	0	0	0	0	0	0	0	0	0	0	0	0	0	0	0	0	0	0	0	14.9372	0	0	0	0	0	0	0	0	0	0	0	0	0	0.799207	0	0	0	0	0	0
457	115.534	0	0	0	0	0	0	0	0	0	0	0	0	0	0	0	0	0	0	0	0	0	0	0	0	1.28571	0	11.0298	0	0	0	0	0	0	0	0	0	8.40441	0	0	0	0	0	0	0	0	0	0	0
458	115.787	0	0	0	0	0	0	0	0	0	0	0	0	0	0	0	0	0	0	0	0	0	0	0	0	0	0	0	0	0	0	0	0	0	0	0	0	0	0	0	0	0	0	0	0	0	0	0	0
459	116.041	0	0	0	0	0	0	0	0	0	0	0	0	0	0	0	0	0	0	0	0	0	0	0	0	0	0	30.1299	0	0	0	0	0	0	0	0	0	0	0	0	0	0	0	0	0	0	0	5.50299	0
460	116.294	0	0	0	0	5.34869	0	0	0	0	0	0	0	0	0	0	0	0	0	0	0	0	0	0	0	0	0	0	5.6199	0	0	17.2583	0	0	0	0	0	303.678	0	0	0	0	1.56304	0	452.748	0	0	0	0
461	116.547	0	0	0	0	0	0	0	0	0	0	0	0	0	0	0	0	0	0	0	0	0	0	0	0	0	0	0	0	0	0	0	0	0	0	0	0	13.4102	0	0	0	0	0	0	0	0	0	0	3.85643
462	116.801	0	0	0	0	0	0	0	0	0	0	0	0	0	0	0	0	0	0	0	0	0	0	0	0	0	0	0	0	0	0	33.9651	0	0	0	0	0	0	0	0	0	0	9.08345	0	0	0	0	0	0
463	117.054	0	0	0	0	0	0	0	0	0	0	0	0	0	0	0.0466634	0	0	0	0	0	0	0	0	0	0	0	0.967929	0	0	0	0	0	0	0	0	0	0	0	0	0	0	7.88257	0	0	0	0	5.17113	0
464	117.307	0	0	0	0	0	0	0	0	0	0	0	0	0	0	0	0	0	0	0	0	0	0	0	0	0	0	0	0	0	0	0	0	0	0	0	0	2.34768	0	0	0	0	0	0	0	0	0	10.8728	0
465	117.561	0	0	0	0	4.77638	0	0	0	0	0	0	0	0	0	0	0	0	19.0327	0	0	0	0	0	0	0	0	0	0	0	0	0	0	0	0	0	0	0	0	0	0	0	0	0	0	0	0	0	0
466	117.814	0	0	0	0	0	0	0	0	0	0	0	0	0	0	0.0408543	0	0	0	0	0	0	0	0	0	0	0	0	0	0	0	0	0	0	0	0	0	0	0	0	0	0	0	0	0	0	0	0	6.29142
467	118.067	0	0	0	0	0	0	0	0	0	0	0	0	0	0	1.03449	0	0	0	0	0	0	0	0	0	0	0	0	0	3.18421	0	0	0	0	0	0	0	0	0	0	0	0	0	0	421.264	0	18.2038	20.5233	0
468	118.321	0	0	0	0	0	0	2.18336	0	0	0	0	0	0	0	0	0	0	0	0	0	0	0	0	0	0	0	0	0	0	0	0	0	0	0	0	0	0	0	31.201	0	0	33.3565	0	0	0	0	0	0
469	118.574	0	0	0	0	0	0	3.85984	0	0	0	0	0	0	0	0	0	0	0	0	0	0	0	0	0	0	0	0	0	0	0	0	0	0	0	0	0	70.7772	0	0	0	0	0	0	121.502	0	0	0	0
470	118.828	0	0	0	0	1.77886	0	0	0	0	0	0	0	0	0	0	0	0	0	0	0	0	0	0	0	0	0	0	0	0	0	0	0	0	0	0	0	0	0	0	0	0	0	0	0	0	0	0	0
471	119.081	0	0	0	0	4.27057	0	0	0	0	0	0	0	0	0	0	0	0	0	0	0	0	0	0	0	0	0	0	0	0	0	0	0	0	0	0	0	0	0	0	0	0	0	0	0	0	0	0	0
472	119.334	0	0	0	0	0	0	0	0	0	0	0	0	0	0	0.565764	0	0	0	0	0	0	0	0	0	0	0	33.9827	0	0	0	0	0	0	0	0	0	0.38474	0	0	0	0	83.055	0.0878105	0	0	0	26.3848	0
473	119.588	0	0	0	0	0	0	0	0	0	0	0	0	0	0	0	0	0	0	0	0	0.186163	0	0	0	0	0	0	0	0	0	0	0	0	0	0	0	0.220564	0	0	0	0	0	0	316.563	0	0	0	0
474	119.841	0	0	0	0	0	0	2.17986	0	0	0	0	0	0	0	0	0	0	0	0	0	0	0	0	0	0	0	0	0	0	0	0	0	0	0	0	0	18.6367	0	0	0	0	0	0	0	0	0	1.43821	0
475	120.094	0	0	0	0	9.69565	0	2.29512	0	0	0	0	0	0	0	0	0	0	0	0	0	0	0	0	0	0	0	0	0	0	0	38.0013	0	0	0	0	0	0	0	0	0	46.8447	0	0	0	0	0	38.0884	0
476	120.348	0	0	0	0	0	0	1.29153	0	0	0	0	0	0	0	2.22781	0	0	0	1.43873	0	0	0	0	0	0	0	0	0.0423541	0	0	0	0	0	0	0	0	0	0	0	0	0	0	0	0	0	0	0	0
477	120.601	0	0	0	0	0	0	0	0	0	0	0	0	0	0	0	0	0	0	0	0	0	0	0	0	0	0	0	0	0	0	0	0	0	0	0	0	0	0	0	0	0	0	0	0	0	0	0	0
478	120.854	0	0	0	0	0	0	0	0	0	0	0	0	0	0	0	0	0	0	0	0	0	0	0	0	0	0	0	0	0	0	0	0	0	0	0	0	0	0	0	0	0	0	0	0	0	0	0	0
479	121.108	0	0	0	0	3.78865	0	0	0	0	0	0	0	0	0	0	0	0	0	0	0	0.0540606	0	0	0	0	0	0	0	0	0	0	0	0	0	0	0	0	0	0	0	0	1.63432	0	0	0	0	0	0
480	121.361	0	0	0	0	0	0	2.29151	0	0	0	0	0	0	0	7.46679	0	0	0	0	0	0	0	0	0	0	0	0	0	0	0	0	0	0	0	0	0	0.140581	0	0	0	0	9.03644	0	0	0	0	33.5838	0
481	121.615	0	0	0	0	0	0	0	0	0	0	0	0	0	0	0	0	0	0	0	0	0	0	0	0	0	0	0	0	0	0	0	0	0	0	0	0	0	0	0	0	0	51.1635	0	0	0	0	0	0
482	121.868	0	0	0	0	0	0	0	0	0	0	0	0	0	0	0	0	0	0	0	0	0	0	0	0	0	0	0	0	0	0	1.40513	58.6716	0	0	0	0	0	0	0	0	0	0	0	0	0	0	0	0
483	122.121	0	0	0	0	0	0.455574	1.31017	0	0	0	0	0	0	0	0	0	0	0	0	0	0	0	0	0	0	0	0	0	0	0	0	0	0	0	0	0	0	0	0	0	0	0	0	1.04293	0	0	0	0
484	122.375	0	0	0	0	0	0	0	0	0	0	0	0	0	0	0	0	0	0	0	0	38.1525	0	0	0	0	0	1.08092	0	0	0	0	0	0	0	0	0	0	0	7.25195	0	0	0	0	0	0	0	0	0
485	122.628	0	0	0	0	0	0	0	0	0	0	0	0	0	0	0	0	0	0	0	0	0	0	0	0	0	0	0	66.8412	0	0	0	92.1554	0	0	0	0	0	0	0	0	0	0	0	0	0	0	0	0
486	122.881	0	0	0	0	3.64191	0	0	0	0	0	0	0	0	0	0.0244984	0	0	0	0	0	0	0	0	0	0	0	0	0	0	0	0	0	0	0	0	0	0	0	0	0	0	0	0	232.895	0	0	0	0
487	123.135	0	0	0	0	0	0	0	0	0	0	0	0	0	0	0	0	0	0	0	0	0	0	0	0	1.07066	0	15.6615	0	0	0	0	0	0	0	0	0	0	0	0	0	0	0	0	0	0	0	0	0
488	123.388	0	0	0	0	0	0	1.83576	0	0	0	0	0	0	0	0.59745	0	0	0	0	0	0	0	0	0	0	0	0	0	0	0	0	0	0	0	0	0	0	0	36.5001	0	0	0	0	701.64	0	0	0	0
489	123.641	0	0	0	0	0	0	0	0	0	0	0	0	0	0	0	0	0	0	0	0	0	0	0	0	0	0	0	0	0	0	0	0	0	0	0	0	0	0	0	0	0	0	0	0	0	0	0	0
490	123.895	0	0	0	0	0	0	0	0	0	0.599549	0	0	0	0	0	0	0	0	0	0	0	0	0	0	0	0	0	0	0	0	0	9.46294	0	0	0	0	10.5699	0	0	0	0	50.9842	0	71763.1	0	0	0	0
491	124.148	0	0	0	0	3.95254	0	0	0	0	0	0	0	0	0	0	0	0	0	0	0	0	0	0	0	0	0	0	0	0	0	0	0	0	0	0	0	0	0	0	0	0	0	0	0	0	0	0	0
492	124.402	0	0	0	0	0	0	0	0	0	0	0	0	0	0	0	0	0	0	0	0	0	0	0	0	0	0	0	0	0	0	0	0	0	0	0	0	0	0	0	0	0	0.80465	0	0	0	0	0	0
493	124.655	0	0	0	0	0	0	0	0	0	0	0	0	0	0	0	0	0	0	0	0	0	0	0	0	0	0	0.977784	0	0	0	0	0	0	0	0	0	0	0	0	0	0	105.497	0	0	0	0	0	0
494	124.908	0	0	0	0	0	0	0	0	0	0	0	0	0	0	0	0	0	0	0	0	0	0	0	0	0	0	0	0	0	0	0	0	0	0	0	0	26972.1	0	0	0	55.2611	0	0	0	0	0	31.7848	0
495	125.162	0	0	0	0	5.54754	0	0	0.631424	0	0	0	0	0	0	0	0	0	0	0	0	0	0	0	0	0	0	0	0	0	0	0	0	0	0	0	0	0	0	0	0	0	0	0	0	0	0	0	0
496	125.415	0	0	0	0	0	0	0	0	0	0	0	0	0	0	0	0	0	0	0	0	0	0	0	0	0	0	0	0	0	0	0	0	0	0	0	0	0	0	0	0	0	0	0	0	0	0	0	0
497	125.668	0	0	0	0	0.853011	0	0	0	0	0	0	0	0	0	0	0	0	0	0	0	0	0	0	0	0	0	0	0	0	0	0	0	0	0	0	0	0	0	0	0	0	0.161306	0	0	0	0	0	0
498	125.922	0	0	0	0	0	0	0	0	0	0	0	0	0	0	0	0	0	0	0	0	0	0	0	0	0	0	0	0	0	0	0	0	0	0	0	0	0	0	0	0	0	0	0	0	0	0	0	0
499	126.175	0	3.93926	0	0	0	0	0	0	0	0	0	0	0	0	0	0	0	0	0	0	0	0	0	0	0	0	0	0	0	0	0	0	0	0	0	0	0	0	0	0	0	52.438	0	0	0	0	0	0
500	126.428	0	0	0	0	0	0	0	0	0	0	0	0	0	0	0	0	0	0	0	0	0	0	0	0	0.0708744	0	0	0	0	0	0	0	0	0	0	0	0	0	0	0	0	70.9301	0	0	0	0	0	0
501	126.682	0	0	0	0	0	0	0	0	0	0	0	0	0	0	0	0	0	0	0	0	0	0	0	0	0	0	0	0	0	0	19.533	0	0	0	0	0	0	0	0	0	95.3698	69.5985	0	0	0	0	0	0
502	126.935	0	0	0	0	5.96957	0	0	0	0	0	0	0	0	0	0	0	0	0	0	0	0	0	0	0	0	0	0	0	0	0	0	0.0168809	0	0	0	0	0	0	0.648893	0	0	0	0	0	0	0.873788	0	0
503	127.189	0	0	0	0	0	0	0	0	0	0	0	0	0	0	0	0.0615242	0	0	0	0	0	0	0	0	0	0	0	0	0	0	0	0	0	0	0	0	0	0	0	0	0	21.3678	22.2064	0	0	0	0	0
504	127.442	0	0	0	0	0	0	0	0	0	0	0	0	0	0	1.12705	0	0	1.44531	0	0	0	0	0	0	0	0	0	0	0	0	0	18.458	0	0	0	0	0	0	0	0	0	0	0	0	0	0	0	0
505	127.695	0	0	0	0	0	0	0	0	0	0	0	0	0	0	0	0	0	0	0	0	0	0	0	0	0	0	0	0	0	0	0	0	0	0	0	0	0	0	0	0	0	0	0	0	0	0	0	0
506	127.949	0	0	0	0	0	0	0	0	0	0	0	0	0	0	0	0	0	0	0	0	0	0	0	0	0	0	0	0	0	0	0	0	0	0	0	0	0	0	0	0	0	0	0	0	0	0	0	0
507	128.202	0	0	0	0	0	0	0	3.6855	0	0	0	0	0	0	0	0	0	0	0	0	0	0	0	0	0	0	0	0.320429	0	0	0	0	0	0	0	0	0	0	0	0	0	0	0	0	0	0.155449	0	0
508	128.455	0	0	0	0	3.28021	0	0	0	0	0	0	0	0	0	0.0516333	0	0	0	0	0	0	0	0	0	0	0	0	0	0	0	0	0	0	0	0	0	0	0	0	0	0	0	0	0	0	0	0	0
509	128.709	0	0	0	0	0	0	0	0	0	0	0	0	0	0	0	0	0	0	0	0	0	0	0	0	0	0	0	0	0	0	0	0	0	0	0	0	0	0	0	0	0	0	0	0	0	0	0	0
510	128.962	0	0	0	0	0	0	0	0	0	0	0	0	0	0	0	0	0	0	0	0	0	0	0	0	0	0	0	0	0	0	0	0	0	0	0	0	0	0	0	0	0	80.1605	0	0	0	92.2702	0	0
511	129.215	0	0	0	0	0	0	0	0	0	0	0	0	0	0	21.7688	0	0	0	0	0	0	0	0	0	0	0	0	0.0354984	0	0	0	0	0	0	0	0	0	0	0	0	0	91.458	0	0	0	0	0	0
512	129.469	0	0	0	0	0	0	0	0	0	0	0	0	0	0	0	0	0	0	0	0	0	0	0	0	0.812106	0	0	0.0829361	0	0	0	0	0	0	0	0	0	0	0	0	111.614	0	48.484	0	0	0	0	0
513	129.722	0	0	0	0	0	0	0	0	0	0	0	0	0	0	0	0	0	0	1.86748	0	0	0	0	0	0	0	0	0	0	0	0	0	0	0	0	0	0	0	0	0	0	0	32.1972	0	0	0	0	0
514	129.976	0	0	0	0	0	0	0	0	0	0	0	0	0	0	0	0	0	0	0	0	0	0	0	0	0	0	0	0	0	0	0	0	0	0	0	0	0	0	0	0	0	82.1302	0	0	0	0	0	0
515	130.229	0	0	0	0	0	0	0	0	0	0	0	0	0	0	0	0	0	0	0	0	0	0	0	0	0	0	0	0	0	0	0	0	0	0	0	0	0	0	0	0	0	32.5366	0	0	0	0	0	0
516	130.482	0	0	0	0	0	0	0	0	0	0	0	0	0	0	0	0	0	0	0	0	0	0	0	0	0	0	0	0	0	0	0	0	0	0	0	0	0	0	0	0	0	0	0	0	0	0	30.8103	0
517	130.736	0	0	0	0	0	0	0	0	0	0	0	0	0	0	0	0	0	0	0	0	0	0	0	0	0	0	0	0	0	0	0	0	0	0	0	0	0	0	46.2922	0	0	0	0	0	0	0	0	0
518	130.989	0	0	0	0	0	0	0	0	0	0	0	0	0	0	0	0	0	0	0	0	0	0	0	0	0	0	0	0	0	0	0	0	0	0	0	0	0	0	0	0	0	0	0	0	0	0	85.4883	0
519	131.242	0	0	0	0	0	0	0	0	0	0	0	0	0	0	0	0	0	0	0	0	0	0	0	0	0	0	0	0	0	0	0	0	0	0	0	0	0	0	0	0	0	0	0	0	0	0	0	0
520	131.496	0	0	0	0	0	0	0	0	0	0	0	0	0	0	0	0	0	0	0	0	0	0	0	0	0	0	0.115605	0	0	0	0	0	0	0	0	0	0	0	0	0	3.23478	4.74953	0	0	0	0	0	0
521	131.749	0	0	0	0	0	0	0	0	0	0	0	0	0	0	0	0	0	0	0	0	0	0	0	0	0	0	0	0	0	0	0	0	0	0	0	0	0	0	0	0	0	25.1283	0	0	0	0	0	0
522	132.002	0	0	0	0	2.56414	0	0	0	0	0	0	0	0	0	1.0387	0	0	0	0	0	50.2224	0	0	0	0	0	0	0	0	0	0	0	0	0	0	0	0	0	0	0	0	0	0	0	0	0	0	0
523	132.256	0	0	0	0	0	0	0	0	0	0	0	0	0	0	0	0	0	0	0	0	0	0	0	0	0	0	0	0	0	0	0	0	0	0	0	0	12.7852	0	0	0	0	0	0	0	0	0	0	0
524	132.509	0	0	0	0	0	0	0	0	0	0	0	0	0	0	0	0	0	0	0	0	0	0	0	0	0	0	0	0	0	0	0	0	0	0	0	0	0	0	66.9446	0	0	0	0	0	0	0	0	0
525	132.763	0	3.83847	0	0	0	0	0	0	0	0	0	0	0	0	0	0	0	0	0	0	0	0	0	0	0	0	0	0	0	0	0	0	0	0	0	0	0	0	0	0	0	20.6769	0	0	0	0	0	0
526	133.016	0	0	0	0	29.4872	0	0	0	0	0	0	0	0	0	0	0	0	0	0	0	0	0	0	0	0	0	0	0	0	0	0	12.6055	0	0	0	0	0	0	0	0	0	117.499	0	0	0	0	0	0
527	133.269	0	0	0	0	0	0	0	0	0	0.294438	0	0	0	0	0	0	0	0	0	0	32.6032	0	0	0	0	0	0	0.0340341	0	0	0	0	0	0	0	0	0	0	172.963	0	0	0	0	0	0	0	0	0
528	133.523	0	0	0	0	0	0	0	0	0	0.268547	0	0	0	0	0	0	0	0	0	0	0	0	0	0	0	0	0	0	0	0	0	0	0	0	0	0	0	0	0	0	0	0	0	0	0	0	0.87865	0
529	133.776	0	0	0	0	0	0	0	0	0	0	0	0	0	0	0.0322382	0	0	0	0	0	0	0	0	0	0	0	0	0.963248	0	0	0	0	0	0	0	0	0	0	0	0	0	119.749	0	0	0	0	0	0
530	134.029	0	1.60942	0	0	0	0	0	0	0	0	0	0	0	0	0	0	0	0	0	0	0	0	0	0	1.10862	0	0	0.125839	0	0	0	0	0	0	0	0	0	0	0	0	0	0	33.5863	0	0	0	0	0
531	134.283	0	0	0	0	0	0	0	0	0	0	0	0	0	0	0.0544514	0	0	0	0	0	0	0	0	0	0	0	0	0	0	0	0	0	0	0	0	0	0	0	48.7804	0	121.198	37.3304	0	0	0	0	0	0
532	134.536	0	0	0	0	0	0	0	0	0	0.329447	0	0	0	0	0	0	0	0	0	0	0	0	0	0	0	0	0	0	0	0	0	0	0	0	0	0	12.3606	0	0	0	10.0002	0	0	0	0	0	0	0
533	134.789	0	0	0	0	0	0	0	0	0	0	0	0.900476	0	0	0	0	0	0	0	0	0	0	0	0	0	0	0	0	0	0	0	0	0	0	0	0	0	0	142.212	0	0	114.175	101.278	0	0	0	0	0
534	135.043	0	0	0	0	0	0	0	0	0	0	0	0	0	0	0	0	0	0	0	0	0	0	0	0	0	0	0	0	0	0	0	0	0	0	0	0	0.729146	0	0	0	0	0	0	0	0	0	0	0
535	135.296	0	0	0	0	0	0	0	0	0	0	0	0	0	0	0	0	0	0	0	0	0	0	141.386	0	0	0	0	0	0	0	0	0.238148	0	0	0	0	0	0	0	0	0	0	0	0	0	0	0.509394	0
536	135.55	0	0	0	0	0	0	0	0	0	0	0	0	0	0	0	0	0	0	0	0	0	0	0	0	0	0	0	0	0	0	0	0	0	0	0	0	0	0	0	0	0	0	0	0	0	0	0	0
537	135.803	0	0	0	0	45.0908	0	0	0	0	0	0	0	0	0	0	0	0	0	0	0	0	0	0	0	0	0	0	0	0	0	0	0	0	0	0	0	0	0	0	0	0	9.48059	0	0	0	0	110.824	0
538	136.056	0	0	0	0	3.46939	0	0	0	0	0	0	0	0	0	0	0	0	0	0	0	0	0	0	0	0	0	0	0	0	0	0	0.012638	0	0	0	0	0	0	0	0	0	0	66.2022	0	0	0	1.73943	0
539	136.31	0	0	0	0	0	0	0	0	0	0	0	0	0	0	0	0	0	0	0	0	0	0	0	0	0	0	0	0	0	0	0	0	0	0	0	0	0	0	0	0	13126.3	0	48.2469	0	0	0	0	0
540	136.563	0	0	0	0	0	0	0	0	0	0	0	0	0	0	0	0	0	0	0	0	0	0	0.00119196	0	0	0	0	0	0	0	0	0	0	0	0	0	0	0	0	0	0	0	0	0	0	0	0	0
541	136.816	0	0	0	0	0	0	0	0	0	0	0	0	0	0	0.206948	0	0	0	0	0	0	0	0	0	0	0	0	0	0	0	0	0	0	0	0	0	0	0	0	0	0	57.94	0	0	0	0	0	0
542	137.07	0	0	0	0	0	0	0	0	0	0	0	0	0	0	0	0	0	0	0	0	0	0	0	0	0	0	0	0	0	0	0	0	0	0	0	0	0	0	0	0	0	0	0	0	0	0	0	0
543	137.323	0	0	0	0	0	0	0	0	0	0	0	0	0	0	0	0	0	0	0	0	0	0	0	0	0	0	0	0	0	0	0	0	0	0	0	0	0	0	0	0	0	0	0	0	0	0	0	0
544	137.576	0	0	0	0	0	0	0	0	0	0	0	0	0	0	0	0	0	0	0	0	0	0	0	0	0	0	0.0247786	0	0	0	0	0	0	0	0	0	0	0	0	0	0	0	0	0	0	0	0	0
545	137.83	0	0	0.178084	0	0	0	0	0	0	0	0	0	0	0	0.0302648	0	0	0	0	0	0	0	0	0	0	0	0	0	0	0	0	0	0	0	0	0	0	0	0	0	0	0	0	0	0	0	0	0
546	138.083	0	3.61499	0	0	0	0	0	0	0	0	0	0	0	0	0	0	0	0	0	0	0	0	0	0	0	0	0	0	0	0	0	0.0165928	0	0	0	0	0	0	0	0	0	0	0	0	0	0	17.2103	3.39754
547	138.337	0	0	0	0	0	0	0	0	0	0	0	0	0	0	0	0	0	0	0	0	0	0	0	0	0	0	0	0	0	0	0	0	0	0	0	0	0	0	0	0	0	0	64.7754	0	0	0	0	0
548	138.59	0	0	0	0	0	0	0	2.96446	0	0	0	0	0	0	0	0	0	0	0	0	0	0	0	0	0	0	0	0	0	0	0	0	0	0	0	0	0	0	0	0	0	0	0	0	0	0	0	0
549	138.843	0	0	0	0	0	0	0	0	0	0	0	0	0	0	0	0	0	0	0	0	0	0	0	0	0	0	0	0	0	0	0	0	0	0	0	0	0	0	0	0	0	0	0	0	0	0	17.7384	0
550	139.097	0	0	0	0	0	0	0	0.0179821	0	0	0	0	0	0	0	0	0	0	0	0	0	0	0	0	0	0	0	0	0	0	0	0	0	0	0	0	0	0	0	0	0	0	0	0	0	0	0	0
551	139.35	0	0	0	0	0	0	0	0	0	0	0	0	0	0	0	0	0	0	0	0	0	0	0	0	0	0	0	0	0	0	0	0	0	0	0	0	0	0	0	0	0	0	0	0	0	0	64.2804	0
552	139.603	0	0	0	0	2.65959	0	0	0	0	0	0	0	0	0	1.30184	0	0	0	0	0	0	0	0	0	0	0	0	0	0	0	0	0	0	0	0	0	0	0	0	0	0	28282.3	35.1548	0	0	0	0	0
553	139.857	0	0	0	0	0	0	0	0	0	0	0	0	0	0	0	0	0	0	0	0	0	0	0	0	0	0	0	0	0	0	0	0	0	0	0	0	0	0	4.14357	0	0	0	160.661	0	0	0	0	0
554	140.11	0	0	0	0	0	0	0	0	0	0	0	0	0	0	0	0	0	0	0	0	0	0	0	0	0	0	0	0	0	0	0	0	0	0	0	0	0	0	0	0	0	0	67.5885	0	0	0	0	0
555	140.363	0	0	0	0	0	0	0	0	0	0	0	0	0	0	0	0	0	0	0	0	0	0	0	0	0	0	0	0	0	0	0	0	0	0	0	0	0	0	0	0	0	25.373	0	0	0	0	8.34643	0
556	140.617	0	0	0	0	0	0	0	0	0	0	0	0	0	0	0	0	0	0	0	0	0	0	0	0	0	0	0	0	0	0	0	0	0	0	0	0	0	0	0	0	0	58.4386	8.15642	0	0	0	0	0
557	140.87	0	0	0	0	0	0	0	0	0	0	0	0	0	0	0	0	0	0	0	0	0	0	0	0	0	0	0	0	0	0	0	0	0	0	0	0	0	0	0	0	0	0	23.0386	0	0	0	0	0
558	141.124	0	0	0	0	0	0	0	39.9488	0	0	0	0	0	0	0	0	0	0	0	0	0	0	0	0	0	0	0	0	0	0	0	0	0	0	0	0	0	0	0	0	0	0	50.3449	0	0	0	0.645282	0
559	141.377	0	0	0	0	0	0	0	0	0	0	0	0	0	0	0	0	0	0	0	0	0	0	0	0	0	0	0	0	0	0	0	0	0	0	0	0	0	0	0	0	0	0	0	0	0	5.8969	0	0
560	141.63	0	0	0	0	0	0	0	0	0	0	0	0	0	0	0	0	0	0	0	0	0.117369	0	0	0	0	0	0	0	0	0	0	0	0	0	0	0	0	0	0	0	0	0	0	0	0	0	0	0
561	141.884	0	0	0	0	0	0	0	0	0	0	0	0	0	0	0	0	0	0	0	0	0	0	0	0	0	0	0	0	0	0	0	0	0	0	0	0	0	0	0	0	0	0	0	0	0	0	0	0
562	142.137	0	0	0	0	0	0	0	0	0	0	0	0	0	0	0	0	0	0	0	0	0	0	0	0	0	0	0	0	0	0	0	0	0	0	0	0	0	0	0	0	0	61.0855	33.6931	0	0	0	0	0
563	142.39	0	0	0	0	0	0	0	0	0	0	0	0	0	0	0	0	0	0	0	0	0	0	0	0	0	0	0	0	0	0	0	0	0	0	0	0	0	0	0	0	0	0	56.9133	0	0	0	4.77396	0
564	142.644	0	0	0	0	0	0	0	0	0	0	0	0	0	0	0	0	0	0	0	0	0	0	0	1.03232	0	0	0	0	0	0	0	0	0	0	0	0	0	0	0	0	0	0	0	0	0	0	0	0
565	142.897	0	0	0	0	0	0	0	0	0	0	0	0	0	0	0	0	0	0	0	0	0	0	0	0	0	0	0	0	0	0	0	0	0	0	0	0	0	0	0	0	0	0	0	0	0	0	10.2014	0
566	143.15	0	0	0	0	0	0	0	0	0	0	0	0	0	0	0	0	0	0	0	0	0	0	0	0	0	0	0	0	0	0	0	0	0	0	0	0	0	0	0	0	0	0	0	0	0	0	0	0
567	143.404	0	0	0	0	0	0	0	0	0	0	0	0	0	0	0	0	0	0	0	0	0	0	0	0	0	0	0	0	0	0	0	0	0	0	0	0	0	0	7.63962	0	0	0	0	0	0	0	0	0
568	143.657	0	0	0	0	0	0	0	0	0	0	0	0	0	0	0	0	0	0	0	0	0	0	0	0	0	0	0	0	0	0	0	0	0	0	0	0	21.0118	0	0	0	0	0	177.493	0	0	0	0	0
569	143.911	0	0	0	0	0	0	0	0	0	0	0	0	0	0	0.126186	0	0	0	0	0	0	0	0	0	0	0	0	0	0	0	0	0	0	0	0	0	0	0	323.607	0	0	0	0	0	0	0	0	0
570	144.164	0	0	0	0	0	0	0	0	0	0	0	0	0	0	0	0	0	0	0	0	0	0	0	0	0	0	0	0.0285597	0	0	0	0	0	0	0	0	0	0	0	0	0	0	0	0	0	0	0	0
571	144.417	0	0	6.88537	0	0	0	0	0	0	0	0	0	0	0	0	0	0	0	0	0	0	0	0	0	0	0	0	0	0	0	0	0	0	0	0	0	0	0	381.756	0	0	40.1414	34.1992	0	0	0	0	0
572	144.671	0	0	0	0	0	0	0	0	0	0	0	0	0	0	0	0	0	0	0	0	0	0	0	0	0	0	0	0	0	0	0	237.217	0	0	0	0	0	0	0	0	0	0	0	0	0	0	0	0
573	144.924	0	0	0	0	0	0	0	0	0	0	0	0	0	0	0	0	0	0	0	0	0	0	0	0	0	0	0	0	0	0	0	0	0	0	0	0	0	0	0	0	0	25.5063	0	0	0	0	3.0377	0
574	145.177	0	0	0	0	0	0	0	0	0	0	0	0	0	0	0	0	0	0	0	0	0	0	0	0	0	0	0	0	0	0	0	0	0	0	0	0	0	0	15.6874	0	0	0	0	0	0	0	15.6454	0
575	145.431	0	0	0	0	0	0	0	0	0	0	0	0	0	0	0	0	0	0	0	0	0	0	0	0	0	0	0	0	0	0	0	0	0	0	0	0	10.9539	0	244.285	0	0	41.767	0	0	0	0	0	0
576	145.684	0	0	0	0	0	0	0	0	0	0	0	0	0	0	0	0	0	0	0	0	0	0	0	0	0	0	0	0	0	0	0	245.812	0	0	0	0	0	0	0	0	0	0	0	0	0	0	242.261	0
577	145.937	0	0	0	0	0	0	0	0	0	0	0	0	0	0	0.150673	0	0	0	0	0	0	0	0	0	0	0	0	0	0	0	0	0	0	0	0	0	0	0	0	0	0	0	0	0	0	0	0	0
578	146.191	0	0	0	0	0	0	0	0	0	0	0	0	0	0	0	0	0	0	0	0	0	0	0	0	0	0	0	0	0	0	0	0	0	0	0	0	0	0	0	0	0	68.4867	0	0	0	0	0	0
579	146.444	0	0	0	0	0	0	0	0	0	0	0	0	0	0	0	0	0	0	0	0	0	0	0	0	0	0	0	0	0	0	0	0	0	0	0	0	0	0	0	0	0	0	263.848	0	0	0	0	0
580	146.698	0	0	0	0	0	0	0	0	0	0	0	0	0	0	0	0	0	0	0	0	0	0	0	0	0	0	0.204236	0	0	0	0	0	0	0	0	0	0	0	0	0	0	0	156.497	0	0	0	0.833154	0
581	146.951	0	0	0	0	0	0	0	0	0	0	0	0	0	0	0	0	0	0	0	0	0	0	0	0	0	0	0	0	0	0	0	0	0	0	0	0	0	0	0	0	0	0	0	0	0	0	0	0
582	147.204	0	0	0	0	0	0	0	0	0	0	0	0	0	0	0.111184	0	0	0	0	0	0	0	0	0	0	0	0	0	0	0	0	0	0	0	0	0	0	0	0	0	0	79.3883	224.447	0	0	0	0	0
583	147.458	0	0	0	0	0	0	0	0	0	0	0	0	0	0	0	0	0	0	0	0	0	0	0	0	0	0	0	0	0	0	0	0	0	0	0	0	0	0	0	0	0	77.5789	0	0	0	0	13.8262	0
584	147.711	0	0	0	0	0	0	0	0	0	0	0	0	0	0	0	0	0	0	0	0	0	0	0	0	0	0	0	0	0	0	0	0	0	0	0	0	0	0	0	0	0	0	63.3724	0	0	0	0	0
585	147.964	0	0	0	0	0	0	0	0	0	0	0	0	0	0	0	0	0	0	0	0	0	0	0	0	0	0	0.37711	0	0	0	0	0	0	0	0	0	0	0	0	0	0	0	0	0	0	0	0	0
586	148.218	0	0	0	0	0	0	0	0	0	0	0	0	0	0	0	0	0	0	0	0	0	0	0	0	0	0	0	0	0	0	0	0	0	0	0	0	0	0	0	0	0	0	0	0	0	0	0	0
587	148.471	0	0	0	0	0	0	0	0	0	0	0	0	0	0	0	0	0	0	0	0	0	0	0	0	0	0	0	0	0	0	0	0	0	0	0	0	0	0	0	0	0	1.72855	10.0439	0	0	0	0	0
588	148.724	0	0	0	0	0	0	0	0	0	0	0	0	0	0	0	0	0	0	0	0	0	0	0	0	0	0	0	0	0	0	0	0	0	0	0	0	0	0	0	0	0	0	152.332	0	0	0	0	0
589	148.978	0	0	0	0	0	0	0	0	0	0	0	0	0	0	0	0	0	0	0	0	0	0	0	0	0	0	0	0	0	0	0	0	0	0	0	0	0	0	0	0	0	0	106.553	0	0	0	0	0
590	149.231	0	0	0	0	0	0	0	0	0	0	0	1.90619	0	0	0	0	0	0	0	0	0	0	0	0	0	0	0	0	0	0	0	0	0	0	0	0	0	0	0	0	0	0	0	0	0	0	0.252526	0
591	149.485	0	0	0	0	0	0	0	189.423	0	0	0	0	0	0	0	0	0	0	0	0	0	0	0	0	0	0	0	0	0	0	0	0	0	0	0	0	0	0	0	0	0	0	25.0165	0	0	0	0	0
592	149.738	0	0	0	0	0	0	0	0	0	0	0	0	0	0	0	0	0	0	0	0	0	0	0	0	0	0	0	0	0	0	0	0	0	0	0	0	0	0	0	0	0	0	109.561	0	0	0	0	0
593	149.991	0	5.91497	0	0	0	0	0	0	0	0	0	0	0	0	0	0	0	0	0	0	0	0	0	0	0	0	0	0	0	0	0	0	0	0	0	0	0	0	0	0	0	0	0	0	0	0	0	0
594	150.245	0	2.25619	0	0	0	0	0	0	0	0	0	0	0	0	0	0	0	0	0	0	0	0	0	0	0	0	0	0	0	0	0	0	0	0	0	0	0	0	326.456	0	0	0	0	0	0	0	0	0
595	150.498	0	0	0	0	0	0	0	0	0	0	0	0	0	0	0	0	0	0	0	0	0	0	0	0	0	0	0.460291	0	0	0	0	0	0	0	0	0	0	0	0	0	0	0	0	0	0	0	0	0
596	150.751	0	0	0	0	0	0	0	0	0	0	0	0	0	0	0	0	0	0	0	0	0	0	0	0	0	0	0	0	0	0	0	0	0	0	0	0	0	0	0	0	0	0	0	0	0	0	0	0
597	151.005	0	0	0	0	0	0	0	200.343	0	0	0	0	0	0	0	0	0	0	0	0	0	0	0	0	0	0	0	0.0540093	0	0	0	0	0	0	0	0	0	0	0	0	0	0	0	0	0	0	0	0
598	151.258	0	0	0	0	0	0	0	0	0	0	0	0	0	0	1.75395	0	0	0	0	0	0	0	0	0	0	0	0	0	0	0	0	0	0	0	0	0	0	0	0	0	0	0	0	0	0	0	3.50447	0
599	151.511	0	3.07492	0	0	0	0	0	2.26323	0	0	0	0	0	0	1.84011	0	0	0	0	0	0	0	0	0	0	0	0	0	0	0	0	0	0	0	0	0	0	0	0	0	0	5.56509	0	0	0	0	0	0
600	151.765	0	0	0	0	0	0	0	0	0	0	0	0	0	0	0	0	0	0	0	0	0	0	0	0	0	0	0	0	0	0	0	0	0	0	0	0	0	0	0	0	0	0	76.6659	0	0	0	0	0
601	152.018	0	0	0	0	0	0	0	0	0	0	0	0	0	0	0	0	0	0	0	0	0	0	0	0	0	0	0	0	0	0	0	0	0	0	0	0	0	0	0	0	0	0	27.6296	0	0	0	0	0
602	152.272	0	2.57603	7.96283	0	0	0	0	0	0	0	0	0	0	1.62379	0	0	0	0	0	0	0	0	0	0	0	0	0	0	0	0	0	0	0	0	0	0	0	0	0	0	0	0	0	0	0	0	0	0
603	152.525	0	2.39883	0	0	0	0	0	0	0	0	0	0	0	0	0	0	0	0	0	0	0	0	0	0	0	0	0	0	0	0	0	0	0	0	0	0	0	0	0	0	0	0	0	0	0	0	0	0
604	152.778	0	0	0	0	0	0	0	0	0	0	0	0	0	0	0	0	0	0	0	0	0	0	0	0	0	0	0	0.444274	0	0	0	0	0	0	0	0	0	0	0	0	0	0	0	0	0	0	0	0
605	153.032	0	0	0	0	0	0	0	0	0	0	0	0	0	0	0	0	0	0	0	0	0	0	0	0	0	0	0	0	0	0	0	0	0	0	0	0	0	0	0	0	0	0	0	0	0	0	0	0
606	153.285	0	0	0	0	0	0	0	0	0	0	0	0	0	0	0	0	0	0	0	0	0	0	0	0	0	0	0	0	0	0	0	0	0	0	0	0	0	0	217.072	0	0	0	0	0	0	0	0	0
607	153.538	0	0	0	0	0	0	0	52.4132	0	0	0	0	0	0	0	0	0	0	0	0	0	0	0	0	0	0	0	0	0	0	0	0	13.5757	0	0	0	0	0	0	0	0	0	0	0	0	0	0	0
608	153.792	0	0	0	0	0	0	0	0	0	0	0	0	0	0	0	0	0	0	0	0	0	0	0	0	0	0	0	0	0	0	0	0	0	0	0	0	0	0	0	0	0	0	19.4251	0	0	0	0	0
609	154.045	0	0	0	0	0	0	0	0	0	0	0	0	0	0	0	0	0	0	0	0	0	0	0	0	0	0	0	0.385253	0	0	0	0	0	0	0	0	0	0	0	0	0	0	0	0	0	0	0	0
610	154.298	0	0	0	0	0	0	0	0	0	0	0	0	0	0	0	0	0	0	0	0	0	0	0	0	0	0	0	0	0	0	0	0	0	0	0	0	0	0	0	0	0	0	0	0	0	0	0	0
611	154.552	0	0	0	0	0	0	0	0	0	0	0	0	0	0	0	0	0	0	0	0	0	0	0	0	0	0	0	0	0	0	0	0	0	0	0	0	0	0	0	0	0	0	0	0	0	0	6.17131	0
612	154.805	0	0	0	0	0	0	0	0	0	0	0	0	0	0	0	0	0	0	0	0	0	0	0	0	0	0	0	0	0	0	0	0	0	0	0	0	6.36025	0	0	0	0	0	0	0	0	0	0	0
613	155.059	0	1184.57	0	0	8.89341	0	0	0	0	0	0	0	0	0	7.02065	0	0	112.52	0	0	0.0252443	0	0	0	0	0	0	0.084503	0	0	0	230.826	0	0	0	0	71.6289	0	22307.3	0	0	483.998	67614.2	0	0	1416.68	6897.33	6.34446
614	155.312	0	0	0	0	0	0	0.0250667	0	0	0	0	0	0	0	0	0	0	0	0	0	0	0	0	0	0	0	0	0.0264916	0	0	0	0	0	0	0	0	0	0	0	0	0	0	0	0	0	0	0	0
615	155.565	0	0	0	0	0	0	0	0	0	0	0	0	0	0	0	0	0	0	0	0	0	0	0	0	0	0	0	0	0	0	0	0	0	0	0	0	0	0	0	0	0	0	0	0	0	0	0	0
616	155.819	0	0	0	0	0	0	0	0	0	0	0	0	0	0	0	0	0	0	0	0	0	0	0	0	0	0	0	0.220189	0	0	0	0	0	0	0	0	0	0	0	0	0	0	0	0	0	0	0	0
617	156.072	0	0	0	0	0	0	0	0	0	0	0	0	0	0	0	0	0	0	0	0	0	0	0	0	0	0.58896	0	0.0349813	0	0	0	0	0	0	0	0	0	0	0	0	0	0	0	0	0	0	0	0
618	156.325	0	0	0	0	0	0	0	0	0	0	0	0	0	0	0	0	0	0	0	0	0	0	0	0	0	0	0	0	0	0	0	0	0	0	0	0	0	0	0	0	0	0	0	0	0	0	0	0
619	156.579	0	0	0	0	0	0	0	0	0	0	0	0	0	0	0	0	0	0	0	0	0	0	0	0	0	0	0	0	0	0	0	0	0	0	0	0	0	0	0	0	0	0	0	0	0	0	0	0
620	156.832	0	0	0	0	0	0	0	0	0	0	0	0	0	0	0	0	0	0	0	0	0	0	0	0	0	0	0	0	0	0	0	0	0	0	0	0	0	0	0	0	0	0	0	0	0	0	0	0
621	157.085	0	0	0	0	0	0	0	0	0	0	0	0	0	0	0	0	0	0	0	0	0	0	0	0	0	0	0	0	0	0	0	0	0	0	0	0	0	0	0	0	0	0	0	0	0	0	0	0
622	157.339	0	0	0	0	0	0	0	0	0	0	0	0	0	0	0	0	0	0	0	0	0	0	0	0	0	0	0	0	0	0	0	0	0	0	0	0	0	0	0	0	0	0	0	0	0	0	0	0
623	157.592	0	0	0	0	0	0	0	0	0	0	0	0	0	0	0	0	0	0	0	0	0	0	0	0	0	0	0	0	0	0	0	0	0	0	0	0	0	0	0	0	0	0	0	0	0	0	0	0
624	157.846	0	0	0	0	0	0	0	0	0	0	0	0	0	0	0	0	0	0	0	0	0	0	0	0	0	0	0	0	0	0	0	0	0	0	0	0	0	0	0	0	0	0	0	0	0	0	0	0
625	158.099	0	0	0	0	0	0	0	0	0	0	0	0	0	0	0	0	0	0	0	0	0	0	0	0	0	0	0	0	0	0	0	0	0	0	0	0	0	0	0	0	0	0	0	0	0	0	0	0
626	158.352	0	0	0	0	0	0	0	0	0	0	0	0	0	0	0	0	0	0	0	0	0	0	0	0	0	0	0	0	0	0	0	0	0	0	0	0	0	0	0	0	0	0	0	0	0	0	0	0
627	158.606	0	0	0	0	0	0	0	0	0	0	0	0	0	0	0	0	0	0	0	0	0	0	0	0	0	0	0.469424	0	0	0	0	0	0	0	0	0	0	0	0	0	0	0	0	0	0	0	0	0
628	158.859	0	0	0	0	0	0	0	0	0	0	0	0	0	0	0	0	0	0	0	0	0	0	0	0	0	0	0	0	0	0	0	0	0	0	0	0	0	0	0	0	0	0	0	0	0	0	0	0
629	159.112	0	0	0	0	0	0	0	0	0	0	0	0	0	0	0	0	0	0	0	0	0	0	0	0	0	0	0	0.047864	0	0	0	0	0	0	0	0	0	0	0	0	0	0	0	0	0	0	0	0
630	159.366	0	0	0	0	0	0	0	0	0	0	0	0	0	0	0	0	0	0	0	0	0	0	0	0	0	0	0	0	0	0	0	0	0	0	0	0	0	0	0	0	0	0	0	0	0	0	0	0
631	159.619	0	0	0	0	0	0	0	0	0	0	0	0	0	0	0	0	0	0	0	0	0	0	0	0	0	0	0	0	0	0	0	0	0	0	0	0	0	0	0	0	0	0	0	0	0	0	0	0
632	159.872	0	0	0	0	0	0	0	0	0	0	0	0	0	0	0	0	0	0	0	0	0	0	0	0	0	0	0	0	0	0	0	0	0	0	0	0	0	0	0	0	0	0	0	0	0	0	0	0
633	160.126	0	0	0	0	0	0	0	0	0	0	0	0	0	0	0	0	0	0	0	0	0	0	0	0	0	0	0	0	0	0	0	0	0	0	0	0	0	0	0	0	0	0	0	0	0	0	0	0
634	160.379	0	0	0	0	0	0	0	0	0	0	0	0	0	0	0	0	0	0	0	0	0	0	0	0	0	0	0	0	0	0	0	0	0	0	0	0	0	0	0	0	0	0	0	0	0	0	0	0
635	160.633	0	0	0	0	0	0	0	0	0	0	0	0	0	0	0	0	0	0	0	0	0	0	0	0	0	0	0	0.0618321	0	0	0	0	0	0	0	0	0	0	0	0	0	0	0	0	0	0	0	0
636	160.886	0	0	0	0	0	0	0	0	0	0	0	0	0	0	0	0	0	0	0	0	0	0	0	0	0	0	0	0	0	0	0	0	0	0	0	0	0	0	0	0	0	0	0	0	0	0	0	0
637	161.139	0	0	0	0	0	0	0	0	0	0	0	0	0	0	0	0	0	0	0	0	0	0	0	0	0	0	0	0	0	0	0	0	0	0	0	0	0	0	0	0	0	0	0	0	0	0	0	0
638	161.393	0	0	0	0	0	0	0	0	0	0	0	1.90601	0	0	0	0	0	0	0	0	0	0	0	0	0	0	0	0	0	0	0	0	0	0	0	0	0	0	0	0	0	0	0	0	0	0	0	0
639	161.646	0	0	0	0	0	0	0	0	0	0	0	0	0	0	0	0	0	0	0	0	0	0	0	0	0	0	0	0.0312476	0	0	0	0	0	0	0	0	0	0	0	0	0	0	0	0	0	0	0	0
640	161.899	0	0	0	0	0	0	0	0	0	0	0	0	0	0	0	0	0	0	0	0	0	0	0	0	0	0	0	0.073657	0	0	0	0	0	0	0	0	0	0	0	0	0	0	0	0	0	0	0	0
641	162.153	0	0	0	0	0	0	0	0	0	0	0	0	0	0	0	0	0	0	0	0	0	0	0	0	0	0	0	0	0	0	0	0	0	0	0	0	0	0	0	0	0	0	0	0	0	0	0	0
642	162.406	0	0	0	0	0	0	0	0	0	0	0	0	0	0	0	0	0	0	0	0	0	0	0	0	0	0	0	0	0	0	0	0	0	0	0	0	0	0	0	0	0	0	0	0	0	0	0	0
643	162.659	0	0	0	0	0	0	0	0	0	0	0	0	0	0	0	0	0	0	0	0	0	0	0	0	0	0	0	0	0	0	0	0	0	0	0	0	0	0	0	0	0	0	0	0	0	0	0	0
644	162.913	0	0	0	0	0	0	0	0	0	0	0	0	0	0	0	0	0	0	0	0	0	0	0	0	0	0	0	0	0	0	0	0	0	0	0	0	0	0	0	0	0	0	0	0	0	0	0	0
645	163.166	0	0	0	0	0	0	0	0	0	0	0	0	0	0	0	0	0	0	0	0	0	0	0	0	0	0	0	0	0	0	0	0	0	0	0	0	0	0	0	0	0	0	0	0	0	0	0	0
646	163.42	0	0	0	0	0	0	0	0	0	0	0	0	0	0	0.0322302	0	0	0	0	0	0	0	0	0	0	0	0	0	0	0	0	0	0	0	0	0	0	0	0	0	0	0	0	0	0	0	0	0
647	163.673	0	0	0	0	0	0	0	0	0	0	0	0	0	0	0	0	0	0	0	0	0	0	0	0	0	0	0	0	0	0	0	0	0	0	0	0	0	0	0	0	0	0	0	0	0	0	0	0
648	163.926	0	0	0	0	0	0	0	0	0	0	0	0	0	0	0	0	0	0	0	0	0	0	0	0	0	0	0	0	0	0	0	0	0	0	0	0	0	0	0	0	0	0	0	0	0	0	0	0
649	164.18	0	0	0	0	0	0	0	0	0	0	0	0	0	0	0	0	0	0	0	0	0	0	0	0	0	0	0	0	0	0	0	0	0	0	0	0	0	0	0	0	0	0	0	0	0	0	0	0
650	164.433	0	0	0	0	0	0	0	0	0	0	0	0	0	0	0	0	0	0	0	0	0	0	0	0	0	0	0	0	0	0	0	0	0	0	0	0	0	0	0	0	0	0	0	0	0	0	0	0
651	164.686	0	0	0	0	0	0	0	0	0	0	0	0	0	0	0	0	0	0	0	0	0	0	0	0	0	0	0	0	0	0	0	0	0	0	0	0	0	0	0	0	0	0	0	0	0	0	0	0
652	164.94	0	0	0	0	0	0	0	0	0	0	0	0	0	0	0	0	0	0	0	0	0	0	0	0	0	0	0	0	0	0	0	0	0	0	0	0	0	0	0	0	0	0	0	0	0	0	0	0
653	165.193	0	0	0	0	0	0	0	0	0	0	0	0	0	0	0	0	0	0	0	0	0	0	0	0	0	0	0	0	0	0	0	0	0	0	0	0	0	0	0	0	0	0	0	0	0	0	0	0
654	165.446	0	0	0	0	0	0	0	0	0	0	0	0	0	0	0	0	0	0	0	0	0	0	0	0	0	0	0	0.34769	0	0	0	0	0	0	0	0	0	0	0	0	0	0	0	0	0	0	0	0
655	165.7	0	0	0	0	0	0	0	0	0	0	0	0	0	0	0	0	0	0	0	0	0	0	0	0	0	0	0	0	0	0	0	0	0	0	0	0	0	0	0	0	0	0	0	0	0	0	0	0
656	165.953	0	0	0	0	0	0	0	0	0	0	0	0	0	0	0	0	0	0	0	0	0	0	0	0	0	0	0	0	0	0	0	0	0	0	0	0	0	0	0	0	0	0	0	0	0	0	0	0
657	166.207	0	0	0	0	0	0	0	0	0	0	0	0	0	0	0	0	0	0	0	0	0	0	0	0	0	0	0	0	0	0	0	0	0	0	0	0	0	0	0	0	0	0	0	0	0	0	0	0
658	166.46	0	0.206147	305.792	0	325.886	0	3.15611	2.86267	0	4.54683	26.7384	0	0	0	21.4653	0.442451	0	1041.43	0	0	0.2209	0.126932	14073.1	4.33795	0	0	14.9476	22.2231	0	0	0.148182	0	12.3552	0	0	0	0	0	0	0	0	0	0	0	0	0	0	0
659	166.713	0	0	0	0	0	0	0	0	0	0	0	0	0	0	0	0	0	0	0	0	0	0	0	0	0	0	0	0	0	0	0	0	0	0	0	0	0	0	0	0	0	0	0	0	0	0	0	0
660	166.967	0	0	0	0	0	0	0	0	0	0	0	0	0	0	0	0	0	0	0	0	0	0	0	0	0	0	0	0	0	0	0	0	0	0	0	0	0	0	0	0	0	0	0	0	0	0	0	0
661	167.22	0	0	0	0	0	0	0	0	0	0	0	0	0	0	0	0	0	0	0	0	0	0	0	0	0	0	0	0	0	0	0	0	0	0	0	0	0	0	0	0	0	0	0	0	0	0	0	0
662	167.473	0	0	0	0	0	0	0	0	0	0	0	0	0	0	0	0	0	0	0	0	0	0	0	0	0	0	0	0	0	0	0	0	0	0	0	0	0	0	0	0	0	0	0	0	0	0	0	0
663	167.727	0	0	0	0	0	0	0	0	0	0	0	0	0	0	0	0	0	0	0	0	0	0	0	0	0	0	0	0	0	0	0	0	0	0	0	0	0	0	0	0	0	0	0	0	0	0	0	0
664	167.98	0	0	0	0	0	0	0	0	0	0	0	0	0	0	0	0	0	0	0	0	0	0	0	0	0	0	0	0	0	0	0	0	0	0	0	0	0	0	0	0	0	0	0	0	0	0	0	0
665	168.233	0	0	0	0	0	0	0	0	0	0	0	0	0	0	0	0	0	0	0	0	0	0	0	0	0	0	0	0	0	0	0	0	0	0	0	0	0	0	0	0	0	0	0	0	0	0	0	0
666	168.487	0	0	0	0	0	0	0	0	0	0	0	0	0	0	0	0	0	0	0	0	0	0	0	0	0	0	0	0	0	0	0	0	0	0	0	0	0	0	0	0	0	0	0	0	0	0	0	0
667	168.74	0	0	0	0	0	0	0	0	0	0	0	0	0	0	0	0	0	0	0	0	0	0	0	0	0	0	0	0	0	0	0	0	0	0	0	0	0	0	0	0	0	0	0	0	0	0	0	0
668	168.994	0	0	0	0	0	0	0	0	0	0	0	0	0	0	0	0	0	0	0	0	0	0	0	0	0	0	0	0	0	0	0	0	0	0	0	0	0	0	0	0	0	0	0	0	0	0	0	0
669	169.247	0	0	0	0	0	0	0	0	0	0	0	0	0	0	0	0	0	0	0	0	0	0	0	0	0	0	0	0	0	0	0	0	0	0	0	0	0	0	0	0	0	0	0	0	0	0	0	0
670	169.5	0	0	0	0	0	0	0	0	0	0	0	0	0	0	0	0	0	0	0	0	0	0	0	0	0	0	0	0	0	0	0	0	0	0	0	0	0	0	0	0	0	0	0	0	0	0	0	0
671	169.754	0	0	0	0	0	0	0	0	0	0	0	0	0	0	0	0	0	0	0	0	0	0	0	0	0	0	0	0	0	0	0	0	0	0	0	0	0	0	0	0	0	0	0	0	0	0	0	0
672	170.007	0	0	0	0	0	0	0	0	0	0	0	0	0	0	0	0	0	0	0	0	0	0	0	0	0	0	0	0	0	0	0	0	0	0	0	0	0	0	0	0	0	0	0	0	0	0	0	0
673	170.26	0	0	0	0	0	0	0	0	0	0	0	0	0	0	0	0	0	0	0	0	0	0	0	0	0	0	0	0	0	0	0	0	0	0	0	0	0	0	0	0	0	0	0	0	0	0	0	0
674	170.514	0	0	0	0	0	0	0	0	0	0	0	0	0	0	0	0	0	0	0	0	0	0	0	0	0	0	0	0	0	0	0	0	0	0	0	0	0	0	0	0	0	0	0	0	0	0	0	0
675	170.767	0	0	0	0	0	0	0	0	0	0	0	0	0	0	0	0	0	0	0	0	0	0	0	0	0	0	0	0	0	0	0	0	0	0	0	0	0	0	0	0	0	0	0	0	0	0	0	0
676	171.02	0	0	0	0	0	0	0	0	0	0	0	0	0	0	0	0	0	0	0	0	0	0	0	0	0	0	0	0	0	0	0	0	0	0	0	0	0	0	0	0	0	0	0	0	0	0	0	0
677	171.274	0	0	0	0	0	0	0	0	0	0	0	0	0	0	0	0	0	0	0	0	0	0	0	0	0	0	0	0	0	0	0	0	0	0	0	0	0	0	0	0	0	0	0	0	0	0	0	0
678	171.527	0	0	0	0	0	0	0	0	0	0	0	0	0	0	0	0	0	0	0	0	0	0	0	0	0	0	0	0	0	0	0	0	0	0	0	0	0	0	0	0	0	0	0	0	0	0	0	0
679	171.781	0	0	0	0	0	0	0	0	0	0	0	0	0	0	0	0	0	0	0	0	0	0	0	0	0	0	0	0	0	0	0	0	0	0	0	0	0	0	0	0	0	0	0	0	0	0	0	0
680	172.034	0	0	0	0	0	0	0	0	0	0	0	0	0	0	0	0	0	0	0	0	0	0	0	0	0	0	0	0	0	0	0	0	0	0	0	0	0	0	0	0	0	0	0	0	0	0	0	0
681	172.287	0	0	0	0	0	0	0	0	0	0	0	0	0	0	0	0	0	0	0	0	0	0	0	0	0	0	0	0	0	0	0	0	0	0	0	0	0	0	0	0	0	0	0	0	0	0	0	0
682	172.541	0	0	0	0	0	0	0	0	0	0	0	0	0	0	0	0	0	0	0	0	0	0	0	0	0	0	0	0	0	0	0	0	0	0	0	0	0	0	0	0	0	0	0	0	0	0	0	0
683	172.794	0	0	0	0	0	0	0	0	0	0	0	0	0	0	0	0	0	0	0	0	0	0	0	0	0	0	0	0	0	0	0	0	0	0	0	0	0	0	0	0	0	0	0	0	0	0	0	0
684	173.047	0	0	0	0	0	0	0	0	0	0	0	0	0	0	0	0	0	0	0	0	0	0	0	0	0	0	0	0	0	0	0	0	0	0	0	0	0	0	0	0	0	0	0	0	0	0	0	0
685	173.301	0	0	0	0	0	0	0	0	0	0	0	0	0	0	0	0	0	0	0	0	0	0	0	0	0	0	0	0	0	0	0	0	0	0	0	0	0	0	0	0	0	0	0	0	0	0	0	0
686	173.554	0	0	0	0	0	0	0	0	0	0	0	0	0	0	0	0	0	0	0	0	0	0	0	0	0	0	0	0	0	0	0	0	0	0	0	0	0	0	0	0	0	0	0	0	0	0	0	0
687	173.807	0	0	0	0	0	0	0	0	0	0	0	0	0	0	0	0	0	0	0	0	0	0	0	0	0	0	0	0	0	0	0	0	0	0	0	0	0	0	0	0	0	0	0	0	0	0	0	0
688	174.061	0	0	0	0	0	0	0	0	0	0	0	0	0	0	0	0	0	0	0	0	0	0	0	0	0	0	0	0	0	0	0	0	0	0	0	0	0	0	0	0	0	0	0	0	0	0	0	0
689	174.314	0	0	0	0	0	0	0	0	0	0	0	0	0	0	0	0	0	0	0	0	0	0	0	0	0	0	0	0	0	0	0	0	0	0	0	0	0	0	0	0	0	0	0	0	0	0	0	0
690	174.568	0	0	0	0	0	0	0	0	0	0	0	0	0	0	0	0	0	0	0	0	0	0	0	0	0	0	0	0	0	0	0	0	0	0	0	0	0	0	0	0	0	0	0	0	0	0	0	0
691	174.821	0	0	0	0	0	0	0	0	0	0	0	0	0	0	0	0	0	0	0	0	0	0	0	0	0	0	0	0	0	0	0	0	0	0	0	0	0	0	0	0	0	0	0	0	0	0	0	0
692	175.074	0	0	0	0	0	0	0	0	0	0	0	0	0	0	0	0	0	0	0	0	0	0	0	0	0	0	0	0	0	0	0	0	0	0	0	0	0	0	0	0	0	0	0	0	0	0	0	0
693	175.328	0	0	0	0	0	0	0	0	0	0	0	0	0	0	0	0	0	0	0	0	0	0	0	0	0	0	0	0	0	0	0	0	0	0	0	0	0	0	0	0	0	0	0	0	0	0	0	0
694	175.581	0	0	0	0	0	0	0	0	0	0	0	0	0	0	0	0	0	0	0	0	0	0	0	0	0	0	0	0	0	0	0	0	0	0	0	0	0	0	0	0	0	0	0	0	0	0	0	0
695	175.834	0	0	0	0	0	0	0	0	0	0	0	0	0	0	0	0	0	0	0	0	0	0	0	0	0	0	0	0	0	0	0	0	0	0	0	0	0	0	0	0	0	0	0	0	0	0	0	0
696	176.088	0	0	0	0	0	0	0	0	0	0	0	0	0	0	0	0	0	0	0	0	0	0	0	0	0	0	0	0	0	0	0	0	0	0	0	0	0	0	0	0	0	0	0	0	0	0	0	0
697	176.341	0	0	0	0	0	0	0	0	0	0	0	0	0	0	0	0	0	0	0	0	0	0	0	0	0	0	0	0	0	0	0	0	0	0	0	0	0	0	0	0	0	0	0	0	0	0	0	0
698	176.594	0	0	0	0	0	0	0	0	0	0	0	0	0	0	0	0	0	0	0	0	0	0	0	0	0	0	0	0	0	0	0	0	0	0	0	0	0	0	0	0	0	0	0	0	0	0	0	0
699	176.848	0	0	0	0	0	0	0	0	0	0	0	0	0	0	0	0	0	0	0	0	0	0	0	0	0	0	0	0	0	0	0	0	0	0	0	0	0	0	0	0	0	0	0	0	0	0	0	0
700	177.101	0	0	0	0	0	0	0	0	0	0	0	0	0	0	0	0	0	0	0	0	0	0	0	0	0	0	0	0	0	0	0	0	0	0	0	0	0	0	0	0	0	0	0	0	0	0	0	0
701	177.355	0	0	0	0	0	0	0	0	0	0	0	0	0	0	0	0	0	0	0	0	0	0	0	0	0	0	0	0	0	0	0	0	0	0	0	0	0	0	0	0	0	0	0	0	0	0	0	0
702	177.608	0	0	0	0	0	0	0	0	0	0	0	0	0	0	0	0	0	0	0	0	0	0	0	0	0	0	0	0	0	0	0	0	0	0	0	0	0	0	0	0	0	0	0	0	0	0	0	0
703	177.861	0	0	0	0	0	0	0	0	0	0	0	0	0	0	0	0	0	0	0	0	0	0	0	0	0	0	0	0	0	0	0	0	0	0	0	0	0	0	0	0	0	0	0	0	0	0	0	0
704	178.115	0	0	0	0	0	0	0	0	0	0	0	0	0	0	0	0	0	0	0	0	0	0	0	0	0	0	0	0	0	0	0	0	0	0	0	0	0	0	0	0	0	0	0	0	0	0	0	0
705	178.368	0	0	0	0	0	0	0	0	0	0	0	0	0	0	0	0	0	0	0	0	0	0	0	0	0	0	0	0	0	0	0	0	0	0	0	0	0	0	0	0	0	0	0	0	0	0	0	0
706	178.621	0	0	0	0	0	0	0	0	0	0	0	0	0	0	0	0	0	0	0	0	0	0	0	0	0	0	0	0	0	0	0	0	0	0	0	0	0	0	0	0	0	0	0	0	0	0	0	0
707	178.875	0	0	0	0	0	0	0	0	0	0	0	0	0	0	0	0	0	0	0	0	0	0	0	0	0	0	0	0	0	0	0	0	0	0	0	0	0	0	0	0	0	0	0	0	0	0	0	0
708	179.128	0	0	0	0	0	0	0	0	0	0	0	0	0	0	0	0	0	0	0	0	0	0	0	0	0	0	0	0	0	0	0	0	0	0	0	0	0	0	0	0	0	0	0	0	0	0	0	0
709	179.381	0	0	0	0	0	0	0	0	0	0	0	0	0	0	0	0	0	0	0	0	0	0	0	0	0	0	0	0	0	0	0	0	0	0	0	0	0	0	0	0	0	0	0	0	0	0	0	0
710	179.635	0	0	0	0	0	0	0	0	0	0	0	0	0	0	0	0	0	0	0	0	0	0	0	0	0	0	0	0	0	0	0	0	0	0	0	0	0	0	0	0	0	0	0	0	0	0	0	0
711	179.888	0	0	0	0	0	0	0	0	0	0	0	0	0	0	0	0	0	0	0	0	0	0	0	0	0	0	0	0	0	0	0	0	0	0	0	0	0	0	0	0	0	0	0	0	0	0	0	0
712	180.142	0	0	0	0	0	0	0	0	0	0	0	0	0	0	0	0	0	0	0	0	0	0	0	0	0	0	0	0	0	0	0	0	0	0	0	0	0	0	0	0	0	0	0	0	0	0	0	0
713	180.395	0	0	0	0	0	0	0	0	0	0	0	0	0	0	0	0	0	0	0	0	0	0	0	0	0	0	0	0	0	0	0	0	0	0	0	0	0	0	0	0	0	0	0	0	0	0	0	0
714	180.648	0	0	0	0	0	0	0	0	0	0	0	0	0	0	0	0	0	0	0	0	0	0	0	0	0	0	0	0	0	0	0	0	0	0	0	0	0	0	0	0	0	0	0	0	0	0	0	0
715	180.902	0	0	0	0	0	0	0	0	0	0	0	0	0	0	0	0	0	0	0	0	0	0	0	0	0	0	0	0	0	0	0	0	0	0	0	0	0	0	0	0	0	0	0	0	0	0	0	0
716	181.155	0	0	0	0	0	0	0	0	0	0	0	0	0	0	0	0	0	0	0	0	0	0	0	0	0	0	0	0	0	0	0	0	0	0	0	0	0	0	0	0	0	0	0	0	0	0	0	0
717	181.408	0	0	0	0	0	0	0	0	0	0	0	0	0	0	0	0	0	0	0	0	0	0	0	0	0	0	0	0	0	0	0	0	0	0	0	0	0	0	0	0	0	0	0	0	0	0	0	0
718	181.662	0	0	0	0	0	0	0	0	0	0	0	0	0	0	0	0	0	0	0	0	0	0	0	0	0	0	0	0	0	0	0	0	0	0	0	0	0	0	0	0	0	0	0	0	0	0	0	0
719	181.915	0	0	0	0	0	0	0	0	0	0	0	0	0	0	0	0	0	0	0	0	0	0	0	0	0	0	0	0	0	0	0	0	0	0	0	0	0	0	0	0	0	0	0	0	0	0	0	0
720	182.168	0	0	0	0	0	0	0	0	0	0	0	0	0	0	0	0	0	0	0	0	0	0	0	0	0	0	0	0	0	0	0	0	0	0	0	0	0	0	0	0	0	0	0	0	0	0	0	0
721	182.422	0	0	0	0	0	0	0	0	0	0	0	0	0	0	0	0	0	0	0	0	0	0	0	0	0	0	0	0	0	0	0	0	0	0	0	0	0	0	0	0	0	0	0	0	0	0	0	0
722	182.675	0	0	0	0	0	0	0	0	0	0	0	0	0	0	0	0	0	0	0	0	0	0	0	0	0	0	0	0	0	0	0	0	0	0	0	0	0	0	0	0	0	0	0	0	0	0	0	0
723	182.929	0	0	0	0	0	0	0	0	0	0	0	0	0	0	0	0	0	0	0	0	0	0	0	0	0	0	0	0	0	0	0	0	0	0	0	0	0	0	0	0	0	0	0	0	0	0	0	0
724	183.182	0	0	0	0	0	0	0	0	0	0	0	0	0	0	0	0	0	0	0	0	0	0	0	0	0	0	0	0	0	0	0	0	0	0	0	0	0	0	0	0	0	0	0	0	0	0	0	0
725	183.435	0	0	0	0	0	0	0	0	0	0	0	0	0	0	0	0	0	0	0	0	0	0	0	0	0	0	0	0	0	0	0	0	0	0	0	0	0	0	0	0	0	0	0	0	0	0	0	0
726	183.689	0	0	0	0	0	0	0	0	0	0	0	0	0	0	0	0	0	0	0	0	0	0	0	0	0	0	0	0	0	0	0	0	0	0	0	0	0	0	0	0	0	0	0	0	0	0	0	0
727	183.942	0	0	0	0	0	0	0	0	0	0	0	0	0	0	0	0	0	0	0	0	0	0	0	0	0	0	0	0	0	0	0	0	0	0	0	0	0	0	0	0	0	0	0	0	0	0	0	0
728	184.195	0	0	0	0	0	0	0	0	0	0	0	0	0	0	0	0	0	0	0	0	0	0	0	0	0	0	0	0	0	0	0	0	0	0	0	0	0	0	0	0	0	0	0	0	0	0	0	0
729	184.449	0	0	0	0	0	0	0	0	0	0	0	0	0	0	0	0	0	0	0	0	0	0	0	0	0	0	0	0	0	0	0	0	0	0	0	0	0	0	0	0	0	0	0	0	0	0	0	0
730	184.702	0	0	0	0	0	0	0	0	0	0	0	0	0	0	0	0	0	0	0	0	0	0	0	0	0	0	0	0	0	0	0	0	0	0	0	0	0	0	0	0	0	0	0	0	0	0	0	0
731	184.955	0	0	0	0	0	0	0	0	0	0	0	0	0	0	0	0	0	0	0	0	0	0	0	0	0	0	0	0	0	0	0	0	0	0	0	0	0	0	0	0	0	0	0	0	0	0	0	0
732	185.209	0	0	0	0	0	0	0	0	0	0	0	0	0	0	0	0	0	0	0	0	0	0	0	0	0	0	0	0	0	0	0	0	0	0	0	0	0	0	0	0	0	0	0	0	0	0	0	0
733	185.462	0	0	0	0	0	0	0	0	0	0	0	0	0	0	0	0	0	0	0	0	0	0	0	0	0	0	0	0	0	0	0	0	0	0	0	0	0	0	0	0	0	0	0	0	0	0	0	0
734	185.716	0	0	0	0	0	0	0	0	0	0	0	0	0	0	0	0	0	0	0	0	0	0	0	0	0	0	0	0	0	0	0	0	0	0	0	0	0	0	0	0	0	0	0	0	0	0	0	0
735	185.969	0	0	0	0	0	0	0	0	0	0	0	0	0	0	0	0	0	0	0	0	0	0	0	0	0	0	0	0	0	0	0	0	0	0	0	0	0	0	0	0	0	0	0	0	0	0	0	0
736	186.222	0	0	0	0	0	0	0	0	0	0	0	0	0	0	0	0	0	0	0	0	0	0	0	0	0	0	0	0	0	0	0	0	0	0	0	0	0	0	0	0	0	0	0	0	0	0	0	0
737	186.476	0	0	0	0	0	0	0	0	0	0	0	0	0	0	0	0	0	0	0	0	0	0	0	0	0	0	0	0	0	0	0	0	0	0	0	0	0	0	0	0	0	0	0	0	0	0	0	0
738	186.729	0	0	0	0	0	0	0	0	0	0	0	0	0	0	0	0	0	0	0	0	0	0	0	0	0	0	0	0	0	0	0	0	0	0	0	0	0	0	0	0	0	0	0	0	0	0	0	0
739	186.982	0	0	0	0	0	0	0	0	0	0	0	0	0	0	0	0	0	0	0	0	0	0	0	0	0	0	0	0	0	0	0	0	0	0	0	0	0	0	0	0	0	0	0	0	0	0	0	0
740	187.236	0	0	0	0	0	0	0	0	0	0	0	0	0	0	0	0	0	0	0	0	0	0	0	0	0	0	0	0	0	0	0	0	0	0	0	0	0	0	0	0	0	0	0	0	0	0	0	0
741	187.489	0	0	0	0	0	0	0	0	0	0	0	0	0	0	0	0	0	0	0	0	0	0	0	0	0	0	0	0	0	0	0	0	0	0	0	0	0	0	0	0	0	0	0	0	0	0	0	0
742	187.742	0	0	0	0	0	0	0	0	0	0	0	0	0	0	0	0	0	0	0	0	0	0	0	0	0	0	0	0	0	0	0	0	0	0	0	0	0	0	0	0	0	0	0	0	0	0	0	0
743	187.996	0	0	0	0	0	0	0	0	0	0	0	0	0	0	0	0	0	0	0	0	0	0	0	0	0	0	0	0	0	0	0	0	0	0	0	0	0	0	0	0	0	0	0	0	0	0	0	0
744	188.249	0	0	0	0	0	0	0	0	0	0	0	0	0	0	0	0	0	0	0	0	0	0	0	0	0	0	0	0	0	0	0	0	0	0	0	0	0	0	0	0	0	0	0	0	0	0	0	0
745	188.503	0	0	0	0	0	0	0	0	0	0	0	0	0	0	0	0	0	0	0	0	0	0	0	0	0	0	0	0	0	0	0	0	0	0	0	0	0	0	0	0	0	0	0	0	0	0	0	0
746	188.756	0	0	0	0	0	0	0	0	0	0	0	0	0	0	0	0	0	0	0	0	0	0	0	0	0	0	0	0	0	0	0	0	0	0	0	0	0	0	0	0	0	0	0	0	0	0	0	0
747	189.009	0	0	0	0	0	0	0	0	0	0	0	0	0	0	0	0	0	0	0	0	0	0	0	0	0	0	0	0	0	0	0	0	0	0	0	0	0	0	0	0	0	0	0	0	0	0	0	0
748	189.263	0	0	0	0	0	0	0	0	0	0	0	0	0	0	0	0	0	0	0	0	0	0	0	0	0	0	0	0	0	0	0	0	0	0	0	0	0	0	0	0	0	0	0	0	0	0	0	0
749	189.516	0	0	0	0	0	0	0	0	0	0	0	0	0	0	0	0	0	0	0	0	0	0	0	0	0	0	0	0	0	0	0	0	0	0	0	0	0	0	0	0	0	0	0	0	0	0	0	0
750	189.769	0	0	0	0	0	0	0	0	0	0	0	0	0	0	0	0	0	0	0	0	0	0	0	0	0	0	0	0	0	0	0	0	0	0	0	0	0	0	0	0	0	0	0	0	0	0	0	0
751	190.023	0	0	0	0	0	0	0	0	0	0	0	0	0	0	0	0	0	0	0	0	0	0	0	0	0	0	0	0	0	0	0	0	0	0	0	0	0	0	0	0	0	0	0	0	0	0	0	0
752	190.276	0	0	0	0	0	0	0	0	0	0	0	0	0	0	0	0	0	0	0	0	0	0	0	0	0	0	0	0	0	0	0	0	0	0	0	0	0	0	0	0	0	0	0	0	0	0	0	0
753	190.529	0	0	0	0	0	0	0	0	0	0	0	0	0	0	0	0	0	0	0	0	0	0	0	0	0	0	0	0	0	0	0	0	0	0	0	0	0	0	0	0	0	0	0	0	0	0	0	0
754	190.783	0	0	0	0	0	0	0	0	0	0	0	0	0	0	0	0	0	0	0	0	0	0	0	0	0	0	0	0	0	0	0	0	0	0	0	0	0	0	0	0	0	0	0	0	0	0	0	0
755	191.036	0	0	0	0	0	0	0	0	0	0	0	0	0	0	0	0	0	0	0	0	0	0	0	0	0	0	0	0	0	0	0	0	0	0	23.9377	0	0	0	0	0	0	0	0	0	0	0	0	0
756	191.29	0	0	0	0	0	0	0	0	0	0	0	0	0	0	0	0	0	0	0	0	0	0	0	0	0	0	0	0	0	0	0	0	0	0	0	0	0	0	0	0	0	0	0	0	0	0	0	0
757	191.543	0	0	0	0	0	0	0	0	0	0	0	0	0	0	0	0	0	0	0	0	0	0	0	0	0	0	0	0	0	0	0	0	0	0	0	0	0	0	0	0	0	0	0	0	0	0	0	0
758	191.796	0	0	0	0	0	0	0	0	0	0	0	0	0	0	0	0	0	0	0	0	0	0	0	0	0	0	0	0	0	0	0	0	0	0	0	0	0	0	0	0	0	0	0	0	0	0	0	0
759	192.05	0	0	0	0	0	0	0	0	0	0	0	0	0	0	0	0	0	0	0	0	0	0	0	0	0	0	0	0	0	0	0	0	0	0	0	0	0	0	0	0	0	0	0	0	0	0	0	0
760	192.303	0	0	0	0	0	0	0	0	0	0	0	0	0	0	0	0	0	0	0	0	0	0	0	0	0	0	0	0	0	0	0	0	0	0	0	0	0	0	0	0	0	0	0	0	0	0	0	0
761	192.556	0	0	0	0	0	0	0	0	0	0	0	0	0	0	0	0	0	0	0	0	0	0	0	0	0	0	0	0	0	0	0	0	0	0	0	0	0	0	0	0	0	0	0	0	0	0	0	0
762	192.81	0	0	0	0	0	0	0	0	0	0	0	0	0	0	0	0	0	0	0	0	0	0	0	0	0	0	0	0	0	0	0	0	0	0	0	0	0	0	0	0	0	0	0	0	0	0	0	0
763	193.063	0	0	0	0	0	0	0	0	0	0	0	0	0	0	0	0	0	0	0	0	0	0	0	0	0	0	0	0	0	0	0	0	0	0	0	0	0	0	0	0	0	0	0	0	0	0	0	0
764	193.316	0	0	0	0	0	0	0	0	0	0	0	0	0	0	0	0	0	0	0	0	0	0	0	0	0	0	0	0	0	0	0	0	0	0	0	0	0	0	0	0	0	0	0	0	0	0	0	0
765	193.57	0	0	0	0	0	0	0	0	0	0	0	0	0	0	0	0	0	0	0	0	0	0	0	0	0	0	0	0	0	0	0	0	0	0	0	0	0	0	0	0	0	0	0	0	0	0	0	0
766	193.823	0	0	0	0	0	0	0	0	0	0	0	0	0	0	0	0	0	0	0	0	0	0	0	0	0	0	0	0	0	0	0	0	0	0	0	0	0	0	0	0	0	0	0	0	0	0	0	0
767	194.077	0	0	0	0	0	0	0	0	0	0	0	0	0	0	0	0	0	0	0	0	0	0	0	0	0	0	0	0	0	0	0	0	0	0	0	0	0	0	0	0	0	0	0	0	0	0	0	0
768	194.33	0	0	0	0	0	0	0	0	0	0	0	0	0	0	0	0	0	0	0	0	0	0	0	0	0	0	0	0	0	0	0	0	0	0	0	0	0	0	0	0	0	0	0	0	0	0	0	0
769	194.583	0	0	0	0	0	0	0	0	0	0	0	0	0	0	0	0	0	0	0	0	0	0	0	0	0	0	0	0	0	0	0	0	0	0	0	0	0	0	0	0	0	0	0	0	0	0	0	0
770	194.837	0	0	0	0	0	0	0	0	0	0	0	0	0	0	0	0	0	0	0	0	0	0	0	0	0	0	0	0	0	0	0	0	0	0	0	0	0	0	0	0	0	0	0	0	0	0	0	0
771	195.09	0	0	0	0	0	0	0	0	0	0	0	0	0	0	0	0	0	0	0	0	0	0	0	0	0	0	0	0	0	0	0	0	0	0	0	0	0	0	0	0	0	0	0	0	0	0	0	0
772	195.343	0	0	0	0	0	0	0	0	0	0	0	0	0	0	0	0	0	0	0	0	0	0	0	0	0	0	0	0	0	0	0	0	0	0	0	0	0	0	0	0	0	0	0	0	0	0	0	0
773	195.597	0	0	0	0	0	0	0	0	0	0	0	0	0	0	0	0	0	0	0	0	0	0	0	0	0	0	0	0	0	0	0	0	0	0	0	0	0	0	0	0	0	0	0	0	0	0	0	0
774	195.85	0	0	0	0	0	0	0	0	0	0	0	0	0	0	0	0	0	0	0	0	0	0	0	0	0	0	0	0	0	0	0	0	0	0	0	0	0	0	0	0	0	0	0	0	0	0	0	0
775	196.103	0	0	0	0	0	0	0	0	0	0	0	0	0	0	0	0	0	0	0	0	0	0	0	0	0	0	0	0	0	0	0	0	0	0	0	0	0	0	0	0	0	0	0	0	0	0	0	0
776	196.357	0	0	0	0	0	0	0	0	0	0	0	0	0	0	0	0	0	0	0	0	0	0	0	0	0	0	0	0	0	0	0	0	0	0	0	0	0	0	0	0	0	0	0	0	0	0	0	0
777	196.61	0	0	0	0	0	0	0	0	0	0	0	0	0	0	0	0	0	0	0	0	0	0	0	0	0	0	0	0	0	0	0	0	0	0	0	0	0	0	0	0	0	0	0	0	0	0	0	0
778	196.864	0	0	0	0	0	0	0	0	0	0	0	0	0	0	0	0	0	0	0	0	0	0	0	0	0	0	0	0	0	0	0	0	0	0	0	0	0	0	0	0	0	0	0	0	0	0	0	0
779	197.117	0	0	0	0	0	0	0	0	0	0	0	0	0	0	0	0	0	0	0	0	0	0	0	0	0	0	0	0	0	0	0	0	0	0	0	0	0	0	0	0	0	0	0	0	0	0	0	0
780	197.37	0	0	0	0	0	0	0	0	0	0	0	0	0	0	0	0	0	0	0	0	0	0	0	0	0	0	0	0	0	0	0	0	0	0	0	0	0	0	0	0	0	0	0	0	0	0	0	0
781	197.624	0	0	0	0	0	0	0	0	0	0	0	0	0	0	0	0	0	0	0	0	0	0	0	0	0	0	0	0	0	0	0	0	0	0	0	0	0	0	0	0	0	0	0	0	0	0	0	0
782	197.877	0	0	0	0	0	0	0	0	0	0	0	0	0	0	0	0	0	0	0	0	0	0	0	0	0	0	0	0	0	0	0	0	0	0	0	0	0	0	0	0	0	0	0	0	0	0	0	0
783	198.13	0	0	0	0	0	0	0	0	0	0	0	0	0	0	0	0	0	0	0	0	0	0	0	0	0	0	0	0	0	0	0	0	0	0	0	0	0	0	0	0	0	0	0	0	0	0	0	0
784	198.384	0	0	0	0	0	0	0	0	0	0	0	0	0	0	0	0	0	0	0	0	0	0	0	0	0	0	0	0	0	0	0	0	0	0	0	0	0	0	0	0	0	0	0	0	0	0	0	0
785	198.637	0	0	0	0	0	0	0	0	0	0	0	0	0	0	0	0	0	0	0	0	0	0	0	0	0	0	0	0	0	0	0	0	0	0	0	0	0	0	0	0	0	0	0	0	0	0	0	0
786	198.89	0	0	0	0	0	0	0	0	0	0	0	0	0	0	0	0	0	0	0	0	0	0	0	0	0	0	0	0	0	0	0	0	0	0	0	0	0	0	0	0	0	0	0	0	0	0	0	0
787	199.144	0	0	0	0	0	0	0	0	0	0	0	0	0	0	0	0	0	0	0	0	0	0	0	0	0	0	0	0	0	0	0	0	0	0	0	0	0	0	0	0	0	0	0	0	0	0	0	0
788	199.397	0	0	0	0	0	0	0	0	0	0	0	0	0	0	0	0	0	0	0	0	0	0	0	0	0	0	0	0	0	0	0	0	0	0	0	0	0	0	0	0	0	0	0	0	0	0	0	0
789	199.651	0	0	0	0	0	0	0	0	0	0	0	0	0	0	0	0	0	0	0	0	0	0	0	0	0	0	0	0	0	0	0	0	0	0	0	0	0	0	0	0	0	0	0	0	0	0	0	0
790	199.904	0	0	0	0	0	0	0	0	0	0	0	0	0	0	0	0	0	0	0	0	0	0	0	0	0	0	0	0	0	0	0	0	0	0	0	0	0	0	0	0	0	0	0	0	0	0	0	0
791	200.157	0	0	0	0	0	0	0	0	0	0	0	0	0	0	0	0	0	0	0	0	0	0	0	0	0	0	0	0	0	0	0	0	0	0	0	0	0	0	0	0	0	0	0	0	0	0	0	0
792	200.411	0	0	0	0	0	0	0	0	0	0	0	0	0	0	0	0	0	0	0	0	0	0	0	0	0	0	0	0	0	0	0	0	0	0	0	0	0	0	0	0	0	0	0	0	0	0	0	0
793	200.664	0	0	0	0	0	0	0	0	0	0	0	0	0	0	0	0	0	0	0	0	0	0	0	0	0	0	0	0	0	0	0	0	0	0	0	0	0	0	0	0	0	0	0	0	0	0	0	0
794	200.917	0	0	0	0	0	0	0	0	0	0	0	0	0	0	0	0	0	0	0	0	0	0	0	0	0	0	0	0	0	0	0	0	0	0	0	0	0	0	0	0	0	0	0	0	0	0	0	0
795	201.171	0	0	0	0	0	0	0	0	0	0	0	0	0	0	0	0	0	0	0	0	0	0	0	0	0	0	0	0	0	0	0	0	0	0	0	0	0	0	0	0	0	0	0	0	0	0	0	0
796	201.424	0	0	0	0	0	0	0	0	0	0	0	0	0	0	0	0	0	0	0	0	0	0	0	0	0	0	0	0	0	0	0	0	0	0	0	0	0	0	0	0	0	0	0	0	0	0	0	0
797	201.677	0	0	0	0	0	0	0	0	0	0	0	0	0	0	0	0	0	0	0	0	0	0	0	0	0	0	0	0	0	0	0	0	0	0	0	0	0	0	0	0	0	0	0	0	0	0	0	0
798	201.931	0	0	0	0	0	0	0	0	0	0	0	0	0	0	0	0	0	0	0	0	0	0	0	0	0	0	0	0	0	0	0	0	0	0	0	0	0	0	0	0	0	0	0	0	0	0	0	0
799	202.184	0	0	0	0	0	0	0	0	0	0	0	0	0	0	0	0	0	0	0	0	0	0	0	0	0	0	0	0	0	0	0	0	0	0	0	0	0	0	0	0	0	0	0	0	0	0	0	0
800	202.438	0	0	0	0	0	0	0	0	0	0	0	0	0	0	0	0	0	0	0	0	0	0	0	0	0	0	0	0	0	0	0	0	0	0	0	0	0	0	0	0	0	0	0	0	0	0	0	0
801	202.691	0	0	0	0	0	0	0	0	0	0	0	0	0	0	0	0	0	0	0	0	0	0	0	0	0	0	0	0	0	0	0	0	0	0	0	0	0	0	0	0	0	0	0	0	0	0	0	0
802	202.944	0	0	0	0	0	0	0	0	0	0	0	0	0	0	0	0	0	0	0	0	0	0	0	0	0	0	0	0	0	0	0	0	0	0	0	0	0	0	0	0	0	0	0	0	0	0	0	0
803	203.198	0	0	0	0	0	0	0	0	0	0	0	0	0	0	0	0	0	0	0	0	0	0	0	0	0	0	0	0	0	0	0	0	0	0	0	0	0	0	0	0	0	0	0	0	0	0	0	0
804	203.451	0	0	0	0	0	0	0	0	0	0	0	0	0	0	0	0	0	0	0	0	0	0	0	0	0	0	0	0	0	0	0	0	0	0	0	0	0	0	0	0	0	0	0	0	0	0	0	0
805	203.704	0	0	0	0	0	0	0	0	0	0	0	0	0	0	0	0	0	0	0	0	0	0	0	0	0	0	0	0	0	0	0	0	0	0	0	0	0	0	0	0	0	0	0	0	0	0	0	0
806	203.958	0	0	0	0	0	0	0	0	0	0	0	0	0	0	0	0	0	0	0	0	0	0	0	0	0	0	0	0	0	0	0	0	0	0	0	0	0	0	0	0	0	0	0	0	0	0	0	0
807	204.211	0	0	0	0	0	0	0	0	0	0	0	0	0	0	0	0	0	0	0	0	0	0	0	0	0	0	0	0	0	0	0	0	0	0	0	0	0	0	0	0	0	0	0	0	0	0	0	0
808	204.464	0	0	0	0	0	0	0	0	0	0	0	0	0	0	0	0	0	0	0	0	0	0	0	0	0	0	0	0	0	0	0	0	0	0	0	0	0	0	0	0	0	0	0	0	0	0	0	0
809	204.718	0	0	0	0	0	0	0	0	0	0	0	0	0	0	0	0	0	0	0	0	0	0	0	0	0	0	0	0	0	0	0	0	0	0	0	0	0	0	0	0	0	0	0	0	0	0	0	0
810	204.971	0	0	0	0	0	0	0	0	0	0	0	0	0	0	0	0	0	0	0	0	0	0	0	0	0	0	0	0	0	0	0	0	0	0	0	0	0	0	0	0	0	0	0	0	0	0	0	0
811	205.225	0	0	0	0	0	0	0	0	0	0	0	0	0	0	0	0	0	0	0	0	0	0	0	0	0	0	0	0	0	0	0	0	0	0	0	0	0	0	0	0	0	0	0	0	0	0	0	0
812	205.478	0	0	0	0	0	0	0	0	0	0	0	0	0	0	0	0	0	0	0	0	0	0	0	0	0	0	0	0	0	0	0	0	0	0	0	0	0	0	0	0	0	0	0	0	0	0	0	0
813	205.731	0	0	0	0	0	0	0	0	0	0	0	0	0	0	0	0	0	0	0	0	0	0	0	0	0	0	0	0	0	0	0	0	0	0	0	0	0.338549	0	0	0	0	0	0	0	0	0	0	0
814	205.985	0	0	0	0	0	0	0	0	0	0	0	0	0	0	0	0	0	0	0	0	0	0	0	0	0	0	0	0	0	0	0	0	0	0	0	0	0	0	0	0	0	0	0	0	0	0	0	0
815	206.238	0	0	0	0	0	0	0	0	0	0	0	0	0	0	0	0	0	0	0	0	0	0	0	0	0	0	0	0	0	0	0	0	0	0	0	0	0	0	0	0	0	0	0	0	0	0	0	0
816	206.491	0	0	0	0	0	0	0	0	0	0	0	0	0	0	0	0	0	0	0	0	0	0	0	0	0	0	0	0	0	0	0	0	0	0	0	0	0	0	0	0	0	0	0	0	0	0	0	0
817	206.745	0	0	0	0	0	0	0	0	0	0	0	0	0	0	0	0	0	0	0	0	0	0	0	0	0	0	0	0	0	0	0	0	0	0	0	0	0	0	0	0	0	0	0	0	0	0	0	0
818	206.998	0	0	0	0	0	0	0	0	0	0	0	0	0	0	0	0	0	0	0	0	0	0	0	0	0	0	0	0	0	0	0	0	0	0	0	0	0	0	0	0	0	0	0	0	0	0	0	0
819	207.251	0	0	0	0	0	0	0	0	0	0	0	0	0	0	0	0	0	0	0	0	0	0	0	0	0	0	0	0	0	0	0	0	0	0	0	0	0	0	0	0	0	0	0	0	0	0	0	0
820	207.505	0	0	0	0	0	0	0	0	0	0	0	0	0	0	0	0	0	0	0	0	0	0	0	0	0	0	0	0	0	0	0	0	0	0	0	0	0	0	0	0	0	0	0	0	0	0	0	0
821	207.758	0	0	0	0	0	0	0	0	0	0	0	0	0	0	0	0	0	0	0	0	0	0	0	0	0	0	0	0	0	0	0	0	0	0	0	0	0	0	0	0	0	0	0	0	0	0	0	0
822	208.012	0	0	0	0	0	0	0	0	0	0	0	0	0	0	0	0	0	0	0	0	0	0	0	0	0	0	0	0	0	0	0	0	0	0	0	0	0	0	0	0	0	0	0	0	0	0	0	0
823	208.265	0	0	0	0	0	0	0	0	0	0	0	0	0	0	0	0	0	0	0	0	0	0	0	0	0	0	0	0	0	0	0	0	0	0	0	0	0	0	0	0	0	0	0	0	0	0	0	0
824	208.518	0	0	0	0	0	0	0	0	0	0	0	0	0	0	0	0	0	0	0	0	0	0	0	0	0	0	0	0	0	0	0	0	0	0	0	0	0	0	0	0	0	0	0	0	0	0	0	0
825	208.772	0	0	0	0	0	0	0	0	0	0	0	0	0	0	0	0	0	0	0	0	0	0	0	0	0	0	0	0	0	0	0	0	0	0	0	0	0	0	0	0	0	0	0	0	0	0	0	0
826	209.025	0	0	0	0	0	0	0	0	0	0	0	0	0	0	0	0	0	0	0	0	0	0	0	0	0	0	0	0	0	0	0	0	0	0	0	0	0	0	0	0	0	0	0	0	0	0	0	0
827	209.278	0	0	0	0	0	0	0	0	0	0	0	0	0	0	0	0	0	0	0	0	0	0	0	0	0	0	0	0	0	0	0	0	0	0	0	0	0	0	0	0	0	0	0	0	0	0	0	0
828	209.532	0	0	0	0	0	0	0	0	0	0	0	0	0	0	0	0	0	0	0	0	0	0	0	0	0	0	0	0	0	0	0	0	0	0	0	0	0	0	0	0	0	0	0	0	0	0	0	0
829	209.785	0	0	0	0	0	0	0	0	0	0	0	0	0	0	0	0	0	0	0	0	0	0	0	0	0	0	0	0	0	0	0	0	0	0	0	0	0	0	0	0	0	0	0	0	0	0	0	0
830	210.038	0	0	0	0	0	0	0	0	0	0	0	0	0	0	0	0	0	0	0	0	0	0	0	0	0	0	0	0	0	0	0	0	0	0	0	0	0	0	0	0	0	0	0	0	0	0	0	0
831	210.292	0	0	0	0	0	0	0	0	0	0	0	0	0	0	0	0	0	0	0	0	0	0	0	0	0	0	0	0	0	0	0	0	0	0	0	0	0	0	0	0	0	0	0	0	0	0	0	0
832	210.545	0	0	0	0	0	0	0	0	0	0	0	0	0	0	0	0	0	0	0	0	0	0	0	0	0	0	0	0	0	0	0	0	0	0	0	0	0	0	0	0	0	0	0	0	0	0	0	0
833	210.799	0	0	0	0	0	0	0	0	0	0	0	0	0	0	0	0	0	0	0	0	0	0	0	0	0	0	0	0	0	0	0	0	0	0	0	0	0	0	0	0	0	0	0	0	0	0	0	0
834	211.052	0	0	0	0	0	0	0	0	0	0	0	0	0	0	0	0	0	0	0	0	0	0	0	0	0	0	0	0	0	0	0	0	0	0	0	0	0	0	0	0	0	0	0	0	0	0	0	0
835	211.305	0	0	0	0	0	0	0	0	0	0	0	0	0	0	0	0	0	0	0	0	0	0	0	0	0	0	0	0	0	0	0	0	0	0	0	0	0	0	0	0	0	0	0	0	0	0	0	0
836	211.559	0	0	0	0	0	0	0	0	0	0	0	0	0	0	0	0	0	0	0	0	0	0	0	0	0	0	0	0	0	0	0	0	0	0	0	0	0	0	0	0	0	0	0	0	0	0	0	0
837	211.812	0	0	0	0	0	0	0	0	0	0	0	0	0	0	0	0	0	0	0	0	0	0	0	0	0	0	0	0	0	0	0	0	0	0	0	0	0	0	0	0	0	0	0	0	0	0	0	0
838	212.065	0	0	0	0	0	0	0	0	0	0	0	0	0	0	0	0	0	0	0	0	0	0	0	0	0	0	0	0	0	0	0	0	0	0	0	0	0	0	0	0	0	0	0	0	0	0	0	0
839	212.319	0	0	0	0	0	0	0	0	0	0	0	0	0	0	0	0	0	0	0	0	0	0	0	0	0	0	0	0	0	0	0	0	0	0	0	0	0	0	0	0	0	0	0	0	0	0	0	0
840	212.572	0	0	0	0	0	0	0	0	0	0	0	0	0	0	0	0	0	0	0	0	0	0	0	0	0	0	0	0	0	0	0	0	0	0	0	0	0	0	0	0	0	0	0	0	0	0	0	0
841	212.825	0	0	0	0	0	0	0	0	0	0	0	0	0	0	0	0	0	0	0	0	0	0	0	0	0	0	0	0	0	0	0	0	0	0	0	0	0	0	0	0	0	0	0	0	0	0	0	0
842	213.079	0	0	0	0	0	0	0	0	0	0	0	0	0	0	0	0	0	0	0	0	0	0	0	0	0	0	0	0	0	0	0	0	0	0	0	0	0	0	0	0	0	0	0	0	0	0	0	0
843	213.332	0	0	0	0	0	0	0	0	0	0	0	0	0	0	0	0	0	0	0	0	0	0	0	0	0	0	0	0	0	0	0	0	0	0	0	0	0	0	0	0	0	0	0	0	0	0	0	0
844	213.586	0	0	0	0	0	0	0	0	0	0	0	0	0	0	0	0	0	0	0	0	0	0	0	0	0	0	0	0	0	0	0	0	0	0	0	0	0	0	0	0	0	0	0	0	0	0	0	0
845	213.839	0	0	0	0	0	0	0	0	0	0	0	0	0	0	0	0	0	0	0	0	0	0	0	0	0	0	0	0	0	0	0	0	0	0	0	0	0	0	0	0	0	0	0	0	0	0	0	0
846	214.092	0	0	0	0	0	0	0	0	0	0	0	0	0	0	0	0	0	0	0	0	0	0	0	0	0	0	0	0	0	0	0	0	0	0	1.71723	0	625.827	0	0	0	0.406294	0	0	0	0	0	0	1.47086
847	214.346	0	0	0	0	0	0	0	0	0	0	0	0	0	0	0	0	0	0	0	0	0	0	0	0	0	0	0	0	0	0	0	0	0	0	0	0	0	0	0	0	0	0	0	0	0	0	0	0
848	214.599	0	0	0	0	0	0	0	0	0	0	0	0	0	0	0	0	0	0	0	0	0	0	0	0	0	0	0	0	0	0	0	0	0	0	0	0	0	0	0	0	0	0	0	0	0	0	0	0
849	214.852	0	0	0	0	0	0	0	0	0	0	0	0	0	0	0	0	0	0	0	0	0	0	0	0	0	0	0	0	0	0	0	0	0	0	0	0	0	0	0	0	0	0	0	0	0	0	0	0
850	215.106	0	0	0	0	0	0	0	0	0	0	0	0	0	0	0	0	0	0	0	0	0	0	0	0	0	0	0	0	0	0	0	0	0	0	0	0	0	0	0	0	0	0	0	0	0	0	0	0
851	215.359	0	0	0	0	0	0	0	0	0	0	0	0	0	0	0	0	0	0	0	0	0	0	0	0	0	0	0	0	0	0	0	0	0	0	0	0	0	0	0	0	0	0	0	0	0	0	0	0
852	215.612	0	0	0	0	0	0	0	0	0	0	0	0	0	0	0	0	0	0	0	0	0	0	0	0	0	0	0	0	0	0	0	0	0	0	0	0	0	0	0	0	0	0	0	0	0	0	0	0
853	215.866	0	0	0	0	0	0	0	0	0	0	0	0	0	0	0	0	0	0	0	0	0	0	0	0	0	0	0	0	0	0	0	0	0	0	0	0	0	0	0	0	0	0	0	0	0	0	0	0
854	216.119	0	0	0	0	0	0	0	0	0	0	0	0	0	0	0	0	0	0	0	0	0	0	0	0	0	0	0	0	0	0	0	0	0	0	0	0	0	0	0	0	0	0	0	0	0	0	0	0
855	216.373	0	0	0	0	0	0	0	0	0	0	0	0	0	0	0	0	0	0	0	0	0	0	0	0	0	0	0	0	0	0	0	0	0	0	0	0	0	0	0	0	0	0	0	0	0	0	0	0
856	216.626	0	0	0	0	0	0	0	0	0	0	0	0	0	0	0	0	0	0	0	0	0	0	0	0	0	0	0	0	0	0	0	0	0	0	0	0	0	0	0	0	0	0	0	0	0	0	0	0
857	216.879	0	0	0	0	0	0	0	0	0	0	0	0	0	0	0	0	0	0	0	0	0	0	0	0	0	0	0	0	0	0	0	0	0	0	0	0	0	0	0	0	0	0	0	0	0	0	0	0
858	217.133	0	0	0	0	0	0	0	0	0	0	0	0	0	0	0	0	0	0	0	0	0	0	0	0	0	0	0	0	0	0	0	0	0	0	0	0	0	0	0	0	0	0	0	0	0	0	0	0
859	217.386	0	0	0	0	0	0	0	0	0	0	0	0	0	0	0	0	0	0	0	0	0	0	0	0	0	0	0	0	0	0	0	0	0	0	0	0	0	0	0	0	0	0	0	0	0	0	0	0
860	217.639	0	0	0	0	0	0	0	0	0	0	0	0	0	0	0	0	0	0	0	0	0	0	0	0	0	0	0	0	0	0	0	0	0	0	0	0	0	0	0	0	0	0	0	0	0	0	0	0
861	217.893	0	0	0	0	0	0	0	0	0	0	0	0	0	0	0	0	0	0	0	0	0	0	0	0	0	0	0	0	0	0	0	0	0	0	0	0	0	0	0	0	0	0	0	0	0	0	0	0
862	218.146	0	0	0	0	0	0	0	0	0	0	0	0	0	0	0	0	0	0	0	0	0	0	0	0	0	0	0	0	0	0	0	0	0	0	0	0	0	0	0	0	0	0	0	0	0	0	0	0
863	218.399	0	0	0	0	0	0	0	0	0	0	0	0	0	0	0	0	0	0	0	0	0	0	0	0	0	0	0	0	0	0	0	0	0	0	0	0	0	0	0	0	0	0	0	0	0	0	0	0
864	218.653	0	0	0	0	0	0	0	0	0	0	0	0	0	0	0	0	0	0	0	0	0	0	0	0	0	0	0	0	0	0	0	0	0	0	0	0	0	0	0	0	0	0	0	0	0	0	0	0
865	218.906	0	0	0	0	0	0	0	0	0	0	0	0	0	0	0	0	0	0	0	0	0	0	0	0	0	0	0	0	0	0	0	0	0	0	0	0	0	0	0	0	0	0	0	0	0	0	0	0
866	219.16	0	0	0	0	0	0	0	0	0	0	0	0	0	0	0	0	0	0	0	0	0	0	0	0	0	0	0	0	0	0	0	0	0	0	0	0	0	0	0	0	0	0	0	0	0	0	0	0
867	219.413	0	0	0	0	0	0	0	0	0	0	0	0	0	0	0	0	0	0	0	0	0	0	0	0	0	0	0	0	0	0	0	0	0	0	0	0	0	0	0	0	0	0	0	0	0	0	0	0
868	219.666	0	0	0	0	0	0	0	0	0	0	0	0	0	0	0	0	0	0	0	0	0	0	0	0	0	0	0	0	0	0	0	0	0	0	0	0	0	0	0	0	0	0	0	0	0	0	0	0
869	219.92	0	0	0	0	0	0	0	0	0	0	0	0	0	0	0	0	0	0	0	0	0	0	0	0	0	0	0	0	0	0	0	0	0	0	0	0	0	0	0	0	0	0	0	0	0	0	0	0
870	220.173	0	0	0	0	0	0	0	0	0	0	0	0	0	0	0	0	0	0	0	0	0	0	0	0	0	0	0	0	0	0	0	0	0	0	0	0	0	0	0	0	0	0	0	0	0	0	0	0
871	220.426	0	0	0	0	0	0	0	0	0	0	0	0	0	0	0	0	0	0	0	0	0	0	0	0	0	0	0	0	0	0	0	0	0	0	0	0	0	0	0	0	0	0	0	0	0	0	0	0
872	220.68	0	0	0	0	0	0	0	0	0	0	0	0	0	0	0	0	0	0	0	0	0	0	0	0	0	0	0	0	0	0	0	0	0	0	0	0	0	0	0	0	0	0	0	0	0	0	0	0
873	220.933	0	0	0	0	0	0	0	0	0	0	0	0	0	0	0	0	0	0	0	0	0	0	0	0	0	0	0	0	0	0	0	0	0	0	0	0	0	0	0	0	0	0	0	0	0	0	0	0
874	221.186	0	0	0	0	0	0	0	0	0	0	0	0	0	0	0	0	0	0	0	0	0	0	0	0	0	0	0	0	0	0	0	0	0	0	0	0	0	0	0	0	0	0	0	0	0	0	0	0
875	221.44	0	0	0	0	0	0	0	0	0	0	0	0	0	0	0	0	0	0	0	0	0	0	0	0	0	0	0	0	0	0	0	0	0	0	0	0	0	0	0	0	0	0	0	0	0	0	0	0
876	221.693	0	0	0	0	0	0	0	0	0	0	0	0	0	0	0	0	0	0	0	0	0	0	0	0	0	0	0	0	0	0	0	0	0	0	0	0	0	0	0	0	0	0	0	0	0	0	0	0
877	221.947	0	0	0	0	0	0	0	0	0	0	0	0	0	0	0	0	0	0	0	0	0	0	0	0	0	0	0	0	0	0	0	0	0	0	0	0	0	0	0	0	0	0	0	0	0	0	0	0
878	222.2	0	0	0	0	0	0	0	0	0	0	0	0	0	0	0	0	0	0	0	0	0	0	0	0	0	0	0	0	0	0	0	0	0	0	0	0	0	0	0	0	0	0	0	0	0	0	0	0
879	222.453	0	0	0	0	0	0	0	0	0	0	0	0	0	0	0	0	0	0	0	0	0	0	0	0	0	0	0	0	0	0	0	0	0	0	0	0	0	0	0	0	0	0	0	0	0	0	0	0
880	222.707	0	0	0	0	0	0	0	0	0	0	0	0	0	0	0	0	0	0	0	0	0	0	0	0	0	0	0	0	0	0	0	0	0	0	0	0	0	0	0	0	0	0	0	0	0	0	0	0
881	222.96	0	0	0	0	0	0	0	0	0	0	0	0	0	0	0	0	0	0	0	0	0	0	0	0	0	0	0	0	0	0	0	0	0	0	0	0	0	0	0	0	0	0	0	0	0	0	0	0
882	223.213	0	0	0	0	0	0	0	0	0	0	0	0	0	0	0	0	0	0	0	0	0	0	0	0	0	0	0	0	0	0	0	0	0	0	0	0	0	0	0	0	0	0	0	0	0	0	0	0
883	223.467	0	0	0	0	0	0	0	0	0	0	0	0	0	0	0	0	0	0	0	0	0	0	0	0	0	0	0	0	0	0	0	0	0	0	0	0	0	0	0	0	0	0	0	0	0	0	0	0
884	223.72	0	0	0	0	0	0	0	0	0	0	0	0	0	0	0	0	0	0	0	0	0	0	0	0	0	0	0	0	0	0	0	0	0	0	0	0	0	0	0	0	0	0	0	0	0	0	0	0
885	223.973	0	0	0	0	0	0	0	0	0	0	0	0	0	0	0	0	0	0	0	0	0	0	0	0	0	0	0	0	0	0	0	0	0	0	0	0	0	0	0	0	0	0	0	0	0	0	0	0
886	224.227	0	0	0	0	0	0	0	0	0	0	0	0	0	0	0	0	0	0	0	0	0	0	0	0	0	0	0	0	0	0	0	0	0	0	0	0	0	0	0	0	0	0	0	0	0	0	0	0
887	224.48	0	0	0	0	0	0	0	0	0	0	0	0	0	0	0	0	0	0	0	0	0	0	0	0	0	0	0	0	0	0	0	0	0	0	0	0	0	0	0	0	0	0	0	0	0	0	0	0
888	224.734	0	0	0	0	0	0	0	0	0	0	0	0	0	0	0	0	0	0	0	0	0	0	0	0	0	0	0	0	0	0	0	0	0	0	0	0	0	0	0	0	0	0	0	0	0	0	0	0
889	224.987	0	0	0	0	0	0	0	0	0	0	0	0	0	0	0	0	0	0	0	0	0	0	0	0	0	0	0	0	0	0	0	0	0	0	0	0	0	0	0	0	0	0	0	0	0	0	0	0
890	225.24	0	0	0	0	0	0	0	0	0	0	0	0	0	0	0	0	0	0	0	0	0	0	0	0	0	0	0	0	0	0	0	0	0	0	0	0	0	0	0	0	0	0	0	0	0	0	0	0
891	225.494	0	0	0	0	0	0	0	0	0	0	0	0	0	0	0	0	0	0	0	0	0	0	0	0	0	0	0	0	0	0	0	0	0	0	0	0	0	0	0	0	0	0	0	0	0	0	0	0
892	225.747	0	0	0	0	0	0	0	0	0	0	0	0	0	0	0	0	0	0	0	0	0	0	0	0	0	0	0	0	0	0	0	0	0	0	0	0	0	0	0	0	0	0	0	0	0	0	0	0
893	226	0	0	0	0	0	0	0	0	0	0	0	0	0	0	0	0	0	0	0	0	0	0	0	0	0	0	0	0	0	0	0	0	0	0	0	0	0	0	0	0	0	0	0	0	0	0	0	0
894	226.254	0	0	0	0	0	0	0	0	0	0	0	0	0	0	0	0	0	0	0	0	0	0	0	0	0	0	0	0	0	0	0	0	0	0	0	0	0	0	0	0	0	0	0	0	0	0	0	0
895	226.507	0	0	0	0	0	0	0	0	0	0	0	0	0	0	0	0	0	0	0	0	0	0	0	0	0	0	0	0	0	0	0	0	0	0	0	0	0	0	0	0	0	0	0	0	0	0	0	0
896	226.76	0	0	0	0	0	0	0	0	0	0	0	0	0	0	0	0	0	0	0	0	0	0	0	0	0	0	0	0	0	0	0	0	0	0	0	0	0	0	0	0	0	0	0	0	0	0	0	0
897	227.014	0	0	0	0	0	0	0	0	0	0	0	0	0	0	0	0	0	0	0	0	0	0	0	0	0	0	0	0	0	0	0	0	0	0	0	0	0	0	0	0	0	0	0	0	0	0	0	0
[truncated: 99 more rows]
[truncated: 13 more columns]

[truncated: 1 more sheets: E3ME Regions]
