# Supplementary material for: Reframing the climate policy game
Source: Research Square preprint supplement (doi:10.21203/rs.3.rs-150151/v1), 2021-02-01
Supplement: Supplementary file 4 [file da6dc0235b5733e3128c79a7.xlsx]

## Sheet: NOTES
Supplementary Dataset 2, Mercure et al., "Reframing the climate policy game", under review, Nature Climate Change 2020
Scenario comparator and stranded fossil fuel assets
Notes for the use and interpretation of the data in this spreadsheet
The purpose of this Supplementary Data file is to allow the user to re-calculate the value of stranded fossil fuel assets for various chosen horizon dates and discount rates, starting from the E3ME-FTT output scenarios
From the page "Totals", the user can change the start date, end date and discount rate used in the coloured boxes in the first two rows.
Detailed comparisons of economic values and SFFA for each of the 61 E3ME-FTT regions can be made by choosing scenario numbers in cells C1-C2
Page		Notes
Totals		Total values for stranded fossil fuel assets, cumulated from data in other pages.
		Used to generate Figure 5 and Supplementary Tables 1-2 of the paper.
		The discount rate and start and end date of the SFFA calculation are defined here, and can be changed by the user, and the table updates automatically.
		The scenario number for the comparison and bar graph can also be changed, and the graph updates automatically.
		To obtain values in % change between two chosen scenarios, put 1 in the red %? Box
		The factors 1.41 are used to scale up marginal costs to be interpreted as commodity prices given the definitions made in the model equations, please enquire with Mercure & Salas for details.
		The price deflator and exchange rate are only used for converting GDP and output data.
Game		Game theory model page. 3 possible realised scenarios can be chosen as basis for political choices. The two level game payoffs result, based on a choice of variables.
Emissions		Total aggregate E3ME-FTT emissions from fuel combustion and industrial processes.
		Land-use emissions from RCPs are not included in the respective scenarios.
Prices$perGJ		Marginal costs of production in dollars per Giga Joule
		These are the median of a distribution, but we interpret the median plus one standard deviation to correspond to the actual marginal cost, involving a factor of sqrt(2).
Prices$perboe		Marginal costs of production in dollars per barrel of oil equivalent			s
		This is a simple scaling of the previous page.
Coal, Oil, Gas		Total primary energy demand/supply for coal, oil, gas, for 61 E3ME regions, in all scenarios:
GDP		GDP for 61 regions from E3ME
AssetValueCoal, Oil, Gas		Energy supply (oil, coal, gas) times marginal cost, discounted and added to the policy horion
		Discount rate and summation start and end dates are in the Totals page, and can be changed
LossesCoal, Oil, Gas, GDP		Discounted cumulated differences in asset values for all regions in all possible pairs of scenarios
GR, KR, QRFF, QRXFF, KRFF		Government expenditure, Total investment, fossil fuel sector output, fossil fuel sector exports, fossil fuel sector investment
		Used to generate bar graph of figure 5.
LossesGR,KR etc		Same as LossesCoal etc
Scenario Identifiers		Name		Identifier		4 climate policy scenarios: InvE, TDT, EU-EA-Net-Zero (2C), Net-Zero
						3 OPEC strategies: Constant production to reserve ratios, QU and SO
		InvE		baIEA_covid_S3
		InvE QU		baIEA_QU_covid_S3			NOTE: Assumptions to reflect the impacts of COVID-19 restrictions on the economy have been used.
		InvE SO		baIEA_SO_covid_S3			Non-COVID scenarios exists, for more info, contact the authors.
		TDT		ba_covid_S3			Contact addresses:		Jean-Francois Mercure, j.mercure@exeter.ac.uk
		TDT QU		ba_QU_covid_S3					Pablo Salas, pas80@cam.ac.uk
		TDT SO		ba_SO_covid_S3
		EU-EA N-Z		2C_covid_S3
		EU-EA N-Z QU		2C_QU_covid_S3
		EU-EA N-Z SO		2C_SO_covid_S3
		Net Zero		1-5C_covid_S3
		NetZero QU		1-5C_QU_covid_S3
		NetZero SO		1-5C_SO_covid_S3

## Sheet: Totals
0	Scenario 1	1		Discount rate		0.06		Percent?	0				Oil Price Scaling		1.414		Coal Price Scaling		1.414		GDP price deflator		1.3
	Scenario 2	8		Time horizon	2022	2036							Gas Price Scaling		1.414		GDP Scaling		1.43		USD to Euro EX		1.1
0		Loss	$2020bn	undiscounted									Discounted
		Coal	Oil	Gas	Total	GDP	Invest.	Govt	Exports FF	Invest. FF	FF-Prod			Coal	Oil	Gas	Total	GDP	Invest.	Govt	Exports FF	Invest. FF	FF-Prod
	Scenario 1	baIEA_covid_S3	baIEA_covid_S3	baIEA_covid_S3	baIEA_covid_S3	baIEA_covid_S3	baIEA_covid_S3	baIEA_covid_S3	baIEA_covid_S3	baIEA_covid_S3	baIEA_covid_S3		Scenario 1	baIEA_covid_S3	baIEA_covid_S3	baIEA_covid_S3	baIEA_covid_S3	baIEA_covid_S3	baIEA_covid_S3	baIEA_covid_S3	baIEA_covid_S3	baIEA_covid_S3	baIEA_covid_S3
E3ME Region	Scenario 2	2C_QU_covid_S3	2C_QU_covid_S3	2C_QU_covid_S3	2C_QU_covid_S3	2C_QU_covid_S3	2C_QU_covid_S3	2C_QU_covid_S3	2C_QU_covid_S3	2C_QU_covid_S3	2C_QU_covid_S3		Scenario 2	2C_QU_covid_S3	2C_QU_covid_S3	2C_QU_covid_S3	2C_QU_covid_S3	2C_QU_covid_S3	2C_QU_covid_S3	2C_QU_covid_S3	2C_QU_covid_S3	2C_QU_covid_S3	2C_QU_covid_S3
1-27	EU	35.2955	125.969	255.701	416.965	-11470.4	-10392.2	0	590.899	293.052	980.775		EU	22.4675	76.4861	146.85	245.803	-7735.21	-7180.82	0	339.739	164.371	578.808
34	USA	96.0423	1889.26	1486.46	3471.77	5386.8	-5337.7	3756.27	671.742	587.258	6507.95		USA	61.0075	1117.5	841.848	2020.36	2352.35	-3828.97	2145.79	326.268	349.919	3784.85
35	Japan	0.206525	0.0800839	0.187943	0.474552	-3579.61	-2957.18	0	0	0	0		Japan	0.131216	0.0494577	0.123241	0.303915	-2469.6	-2124.41	0	0	0	0
36	Canada	8.22683	646.597	188.658	843.482	1126.43	-1007.31	307.093	1153.24	173.248	1411.86		Canada	5.22797	382.882	107.594	495.704	594.74	-710.323	177.095	689.335	101.743	829.496
37	Australia	79.9594	29.9491	133.04	242.949	-1011.81	-954.377	0	-5.27897	13.6225	559.038		Australia	50.8162	17.7996	75.7927	144.409	-686.555	-655.138	0	-13.9218	8.6356	338.116
39	Russian Federation	57.4735	1190.33	488.392	1736.2	-459.204	-2005.16	398.045	904.878	160.736	768.056		Russian Federation	36.5115	713.446	280.147	1030.1	-356.87	-1305.66	230.294	557.349	92.981	443.065
41	China	437.087	465.101	292.219	1194.41	-21993.7	-14588	0	0	742.363	2228.91		China	279.68	276.943	166.183	722.806	-14798.3	-10336.5	0	0	432.378	1348.97
42	India	71.6215	21.65	50.7427	144.014	-6310.63	-6439.59	0	0	44.5664	258.178		India	45.6458	13.3428	28.9188	87.9074	-4085.79	-4141.02	0	0	26.2496	155.34
44	Brazil	0.725777	225.578	57.5678	283.872	-2140.75	-3067.46	0	170.128	166.831	284.98		Brazil	0.46148	135.368	32.6826	168.512	-1393.37	-2012.03	0	134.807	98.7636	170.261
43,45,46,47	Rest of Latin America	16.811	927.414	361.716	1305.94	-3723.56	-3589.26	0	98.8361	162.892	1171.86		Rest of Latin America	10.8336	551.279	205.742	767.855	-2418.21	-2339.35	0	62.2844	95.3392	691.252
52,56,59	Rest OPEC	0.255473	671.451	483.326	1155.03	-393.478	-1139.01	286.705	479.563	13.4252	678.629		Rest OPEC	0.162251	412.966	292.395	705.523	-242.842	-711.188	170.578	309.012	8.36073	427.099
38,40,48,49,50,51,53,54,57,58,60,61	Rest of world	126.091	550.373	257.226	933.69	-7973.07	-6689.22	134.309	551.549	142.126	2339.12		Rest of world	81.2073	328.905	149.115	559.227	-5059.13	-4446.28	79.5577	428.798	87.1291	1420.03
55	Saudi Arabia	0	224.834	26.6057	251.44	93.0313	-383.078	109.69	61.5294	0.794026	124.914		Saudi Arabia	0	136.167	16.3377	152.505	24.6037	-265.511	63.1132	42.0078	0.517234	77.7821
56	Nigeria	0.00787078	59.8096	8.22732	68.0447	-24.8734	-33.3266	46.7323	-61.4695	2.63705	47.6611		Nigeria	0.00499868	36.7062	4.81021	41.5214	-18.6791	-21.819	26.4933	-36.7278	1.65334	28.5256
57	South Africa	36.4399	0.36638	2.95267	39.7589	419.015	-205.493	0	438.274	37.3676	595.864		South Africa	23.4789	0.217522	1.67374	25.3702	271.961	-135.045	0	283.957	24.5376	383.394
58	Rest of Africa	1.42114	126.259	10.074	137.754	-1200.65	-577.535	0	4.48642	3.01886	146.474		Rest of Africa	0.902868	74.8064	5.75758	81.4669	-712.674	-370.507	0	2.42353	1.77904	86.6583
59	Africa OPEC	2.40009e-05	177.616	256.326	433.941	-84.927	-91.9928	15.6376	0	4.91294	58.0324		Africa OPEC	1.52328e-05	112.178	149.1	261.278	-57.8722	-59.5565	9.28335	0	3.01371	35.3873
-
	Total $tn	0.932358	6.97427	4.08313	11.9898	-53.1005	-59.6057	4.99212	4.67709	2.5107	17.424		Total $tn	0.595863	4.16654	2.34447	7.10688	-36.7098	-40.7812	2.86643	2.87568	1.4725	10.333
	Undiscounted		$2020tn													Discounted		$2020tn													Discounted		$2020tn
		1	2	3	4	5	6	7	8	9	10	11	12				1	2	3	4	5	6	7	8	9	10	11	12			All fossil fuel assets
	Total	baIEA_covid_S3	baIEA_QU_covid_S3	baIEA_SO_covid_S3	ba_covid_S3	ba_QU_covid_S3	ba_SO_covid_S3	2C_covid_S3	2C_QU_covid_S3	2C_SO_covid_S3	1-5C_covid_S3	1-5C_QU_covid_S3	1-5C_SO_covid_S3			Total	baIEA_covid_S3	baIEA_QU_covid_S3	baIEA_SO_covid_S3	ba_covid_S3	ba_QU_covid_S3	ba_SO_covid_S3	2C_covid_S3	2C_QU_covid_S3	2C_SO_covid_S3	1-5C_covid_S3	1-5C_QU_covid_S3	1-5C_SO_covid_S3			Total	InvE	InvE QU	InvE SO	TDT	TDT QU	TDT SO	EU-EA N-Z	EU-EA N-Z QU	EU-EA N-Z SO	Net Zero	NetZero QU	NetZero SO
1	baIEA_covid_S3	0	-0.513582	0.347662	6.89059	6.79749	6.94289	12.0936	11.9898	12.3583	19.0734	18.6283	19.4767		1	baIEA_covid_S3	0	-0.320242	0.2141	3.92363	3.86202	3.95471	7.17197	7.10688	7.33347	11.4392	11.1543	11.6838			InvE	0	-0.320242	0.2141	3.92363	3.86202	3.95471	7.17197	7.10688	7.33347	11.4392	11.1543	11.6838
2	baIEA_QU_covid_S3		0	0.861244	7.40417	7.31107	7.45647	12.6072	12.5033	12.8719	19.587	19.1418	19.9903		2	baIEA_QU_covid_S3		0	0.534342	4.24387	4.18226	4.27495	7.49221	7.42712	7.65371	11.7594	11.4746	12.0041			InvE QU		0	0.534342	4.24387	4.18226	4.27495	7.49221	7.42712	7.65371	11.7594	11.4746	12.0041
3	baIEA_SO_covid_S3			0	6.54293	6.44983	6.59522	11.746	11.6421	12.0107	18.7257	18.2806	19.1291		3	baIEA_SO_covid_S3			0	3.70953	3.64792	3.74061	6.95786	6.89278	7.11937	11.2251	10.9402	11.4697			InvE SO			0	3.70953	3.64792	3.74061	6.95786	6.89278	7.11937	11.2251	10.9402	11.4697
4	ba_covid_S3				0	-0.0931028	0.0522959	5.20303	5.09917	5.46774	12.1828	11.7377	12.5862		4	ba_covid_S3				0	-0.0616062	0.0310795	3.24834	3.18325	3.40984	7.51556	7.2307	7.76022			TDT				0	-0.0616062	0.0310795	3.24834	3.18325	3.40984	7.51556	7.2307	7.76022
5	ba_QU_covid_S3					0	0.145399	5.29613	5.19227	5.56085	12.2759	11.8308	12.6793		5	ba_QU_covid_S3					0	0.0926856	3.30994	3.24486	3.47145	7.57717	7.2923	7.82183			TDT QU					0	0.0926856	3.30994	3.24486	3.47145	7.57717	7.2923	7.82183
6	ba_SO_covid_S3						0	5.15073	5.04688	5.41545	12.1305	11.6854	12.5339		6	ba_SO_covid_S3						0	3.21726	3.15217	3.37876	7.48448	7.19962	7.72914			TDT SO						0	3.21726	3.15217	3.37876	7.48448	7.19962	7.72914
7	2C_covid_S3							0	-0.103857	0.264716	6.97978	6.53464	7.38313		7	2C_covid_S3							0	-0.065086	0.161505	4.26722	3.98236	4.51188			EU-EA N-Z							0	-0.065086	0.161505	4.26722	3.98236	4.51188
8	2C_QU_covid_S3								0	0.368573	7.08364	6.63849	7.48699		8	2C_QU_covid_S3								0	0.226591	4.33231	4.04745	4.57697			EU-EA N-Z QU								0	0.226591	4.33231	4.04745	4.57697
9	2C_SO_covid_S3									0	6.71507	6.26992	7.11841		9	2C_SO_covid_S3									0	4.10572	3.82085	4.35038			EU-EA N-Z SO									0	4.10572	3.82085	4.35038
10	1-5C_covid_S3										0	-0.445147	0.403345		10	1-5C_covid_S3										0	-0.284861	0.24466			Net Zero										0	-0.284861	0.24466
11	1-5C_QU_covid_S3											0	0.848492		11	1-5C_QU_covid_S3											0	0.529522			NetZero QU											0	0.529522
12	1-5C_SO_covid_S3												0		12	1-5C_SO_covid_S3												0			NetZero SO												0
		1	2	3	4	5	6	7	8	9	10	11	12				1	2	3	4	5	6	7	8	9	10	11	12			Coal
	Coal	baIEA_covid_S3	baIEA_QU_covid_S3	baIEA_SO_covid_S3	ba_covid_S3	ba_QU_covid_S3	ba_SO_covid_S3	2C_covid_S3	2C_QU_covid_S3	2C_SO_covid_S3	1-5C_covid_S3	1-5C_QU_covid_S3	1-5C_SO_covid_S3			Coal	baIEA_covid_S3	baIEA_QU_covid_S3	baIEA_SO_covid_S3	ba_covid_S3	ba_QU_covid_S3	ba_SO_covid_S3	2C_covid_S3	2C_QU_covid_S3	2C_SO_covid_S3	1-5C_covid_S3	1-5C_QU_covid_S3	1-5C_SO_covid_S3			Total	InvE	InvE QU	InvE SO	TDT	TDT QU	TDT SO	EU-EA N-Z	EU-EA N-Z QU	EU-EA N-Z SO	Net Zero	NetZero QU	NetZero SO
1	baIEA_covid_S3	0	0.000273392	-9.83274e-05	0.585422	0.583796	0.585372	0.932623	0.932358	0.932641	1.13908	1.1391	1.13906		1	baIEA_covid_S3	0	0.00015974	-5.06186e-05	0.354755	0.353898	0.354763	0.596036	0.595863	0.596043	0.733467	0.73348	0.73346			InvE	0	0.00015974	-5.06186e-05	0.354755	0.353898	0.354763	0.596036	0.595863	0.596043	0.733467	0.73348	0.73346
2	baIEA_QU_covid_S3		0	-0.00037172	0.585148	0.583522	0.585099	0.93235	0.932085	0.932368	1.13881	1.13882	1.13878		2	baIEA_QU_covid_S3		0	-0.000210358	0.354595	0.353738	0.354603	0.595876	0.595703	0.595883	0.733307	0.73332	0.7333			InvE QU		0	-0.000210358	0.354595	0.353738	0.354603	0.595876	0.595703	0.595883	0.733307	0.73332	0.7333
3	baIEA_SO_covid_S3			0	0.58552	0.583894	0.58547	0.932722	0.932457	0.93274	1.13918	1.13919	1.13915		3	baIEA_SO_covid_S3			0	0.354805	0.353948	0.354814	0.596087	0.595913	0.596094	0.733517	0.73353	0.73351			InvE SO			0	0.354805	0.353948	0.354814	0.596087	0.595913	0.596094	0.733517	0.73353	0.73351
4	ba_covid_S3				0	-0.0016259	-4.96357e-05	0.347202	0.346937	0.34722	0.553662	0.553674	0.553634		4	ba_covid_S3				0	-0.000856884	8.43988e-06	0.241282	0.241108	0.241288	0.378712	0.378725	0.378705			TDT				0	-0.000856884	8.43988e-06	0.241282	0.241108	0.241288	0.378712	0.378725	0.378705
5	ba_QU_covid_S3					0	0.00157626	0.348828	0.348563	0.348846	0.555288	0.5553	0.55526		5	ba_QU_covid_S3					0	0.000865323	0.242138	0.241965	0.242145	0.379569	0.379582	0.379562			TDT QU					0	0.000865323	0.242138	0.241965	0.242145	0.379569	0.379582	0.379562
6	ba_SO_covid_S3						0	0.347251	0.346986	0.347269	0.553712	0.553723	0.553684		6	ba_SO_covid_S3						0	0.241273	0.241099	0.24128	0.378703	0.378717	0.378697			TDT SO						0	0.241273	0.241099	0.24128	0.378703	0.378717	0.378697
7	2C_covid_S3							0	-0.000265012	1.80974e-05	0.206461	0.206472	0.206433		7	2C_covid_S3							0	-0.00017368	6.72095e-06	0.13743	0.137443	0.137424			EU-EA N-Z							0	-0.00017368	6.72095e-06	0.13743	0.137443	0.137424
8	2C_QU_covid_S3								0	0.000283109	0.206726	0.206737	0.206698		8	2C_QU_covid_S3								0	0.000180401	0.137604	0.137617	0.137597			EU-EA N-Z QU								0	0.000180401	0.137604	0.137617	0.137597
9	2C_SO_covid_S3									0	0.206443	0.206454	0.206414		9	2C_SO_covid_S3									0	0.137424	0.137437	0.137417			EU-EA N-Z SO									0	0.137424	0.137437	0.137417
10	1-5C_covid_S3										0	1.13082e-05	-2.81209e-05		10	1-5C_covid_S3										0	1.31385e-05	-6.78304e-06			Net Zero										0	1.31385e-05	-6.78304e-06
11	1-5C_QU_covid_S3											0	-3.94292e-05		11	1-5C_QU_covid_S3											0	-1.99215e-05			NetZero QU											0	-1.99215e-05
12	1-5C_SO_covid_S3												0		12	1-5C_SO_covid_S3												0			NetZero SO												0
		1	2	3	4	5	6	7	8	9	10	11	12				1	2	3	4	5	6	7	8	9	10	11	12			Oil
	Oil	baIEA_covid_S3	baIEA_QU_covid_S3	baIEA_SO_covid_S3	ba_covid_S3	ba_QU_covid_S3	ba_SO_covid_S3	2C_covid_S3	2C_QU_covid_S3	2C_SO_covid_S3	1-5C_covid_S3	1-5C_QU_covid_S3	1-5C_SO_covid_S3			Oil	baIEA_covid_S3	baIEA_QU_covid_S3	baIEA_SO_covid_S3	ba_covid_S3	ba_QU_covid_S3	ba_SO_covid_S3	2C_covid_S3	2C_QU_covid_S3	2C_SO_covid_S3	1-5C_covid_S3	1-5C_QU_covid_S3	1-5C_SO_covid_S3			Total	InvE	InvE QU	InvE SO	TDT	TDT QU	TDT SO	EU-EA N-Z	EU-EA N-Z QU	EU-EA N-Z SO	Net Zero	NetZero QU	NetZero SO
1	baIEA_covid_S3	0	-0.391727	0.241586	3.22645	3.17242	3.27047	7.04638	6.97427	7.28411	11.7782	11.3545	12.084		1	baIEA_covid_S3	0	-0.243639	0.149065	1.82672	1.79182	1.85169	4.2094	4.16654	4.35397	7.09684	6.82674	7.28361			InvE	0	-0.243639	0.149065	1.82672	1.79182	1.85169	4.2094	4.16654	4.35397	7.09684	6.82674	7.28361
2	baIEA_QU_covid_S3		0	0.633313	3.61818	3.56414	3.6622	7.43811	7.366	7.67584	12.17	11.7462	12.4758		2	baIEA_QU_covid_S3		0	0.392704	2.07035	2.03546	2.09533	4.45304	4.41018	4.59761	7.34048	7.07038	7.52725			InvE QU		0	0.392704	2.07035	2.03546	2.09533	4.45304	4.41018	4.59761	7.34048	7.07038	7.52725
3	baIEA_SO_covid_S3			0	2.98486	2.93083	3.02889	6.80479	6.73268	7.04252	11.5366	11.1129	11.8425		3	baIEA_SO_covid_S3			0	1.67765	1.64275	1.70263	4.06034	4.01748	4.2049	6.94777	6.67768	7.13455			InvE SO			0	1.67765	1.64275	1.70263	4.06034	4.01748	4.2049	6.94777	6.67768	7.13455
4	ba_covid_S3				0	-0.054033	0.0440226	3.81993	3.74782	4.05766	8.55178	8.12805	8.85759		4	ba_covid_S3				0	-0.0348982	0.0249762	2.38269	2.33983	2.52725	5.27012	5.00003	5.4569			TDT				0	-0.0348982	0.0249762	2.38269	2.33983	2.52725	5.27012	5.00003	5.4569
5	ba_QU_covid_S3					0	0.0980556	3.87397	3.80186	4.11169	8.60581	8.18209	8.91162		5	ba_QU_covid_S3					0	0.0598745	2.41758	2.37473	2.56215	5.30502	5.03493	5.4918			TDT QU					0	0.0598745	2.41758	2.37473	2.56215	5.30502	5.03493	5.4918
6	ba_SO_covid_S3						0	3.77591	3.7038	4.01364	8.50776	8.08403	8.81357		6	ba_SO_covid_S3						0	2.35771	2.31485	2.50228	5.24514	4.97505	5.43192			TDT SO						0	2.35771	2.31485	2.50228	5.24514	4.97505	5.43192
7	2C_covid_S3							0	-0.0721102	0.237728	4.73185	4.30812	5.03766		7	2C_covid_S3							0	-0.0428577	0.144567	2.88744	2.61734	3.07421			EU-EA N-Z							0	-0.0428577	0.144567	2.88744	2.61734	3.07421
8	2C_QU_covid_S3								0	0.309838	4.80396	4.38023	5.10977		8	2C_QU_covid_S3								0	0.187424	2.93029	2.6602	3.11707			EU-EA N-Z QU								0	0.187424	2.93029	2.6602	3.11707
9	2C_SO_covid_S3									0	4.49412	4.07039	4.79993		9	2C_SO_covid_S3									0	2.74287	2.47277	2.92965			EU-EA N-Z SO									0	2.74287	2.47277	2.92965
10	1-5C_covid_S3										0	-0.423726	0.30581		10	1-5C_covid_S3										0	-0.270094	0.186777			Net Zero										0	-0.270094	0.186777
11	1-5C_QU_covid_S3											0	0.729536		11	1-5C_QU_covid_S3											0	0.456871			NetZero QU											0	0.456871
12	1-5C_SO_covid_S3												0		12	1-5C_SO_covid_S3												0			NetZero SO												0
		1	2	3	4	5	6	7	8	9	10	11	12				1	2	3	4	5	6	7	8	9	10	11	12			Gas
	Gas	baIEA_covid_S3	baIEA_QU_covid_S3	baIEA_SO_covid_S3	ba_covid_S3	ba_QU_covid_S3	ba_SO_covid_S3	2C_covid_S3	2C_QU_covid_S3	2C_SO_covid_S3	1-5C_covid_S3	1-5C_QU_covid_S3	1-5C_SO_covid_S3			Gas	baIEA_covid_S3	baIEA_QU_covid_S3	baIEA_SO_covid_S3	ba_covid_S3	ba_QU_covid_S3	ba_SO_covid_S3	2C_covid_S3	2C_QU_covid_S3	2C_SO_covid_S3	1-5C_covid_S3	1-5C_QU_covid_S3	1-5C_SO_covid_S3			Total	InvE	InvE QU	InvE SO	TDT	TDT QU	TDT SO	EU-EA N-Z	EU-EA N-Z QU	EU-EA N-Z SO	Net Zero	NetZero QU	NetZero SO
1	baIEA_covid_S3	0	-0.122128	0.106175	3.07872	3.04128	3.08704	4.11461	4.08313	4.14159	6.15609	6.13466	6.25365		1	baIEA_covid_S3	0	-0.0767631	0.0650857	1.74216	1.71631	1.74825	2.36653	2.34447	2.38346	3.60888	3.5941	3.66677			InvE	0	-0.0767631	0.0650857	1.74216	1.71631	1.74825	2.36653	2.34447	2.38346	3.60888	3.5941	3.66677
2	baIEA_QU_covid_S3		0	0.228302	3.20085	3.1634	3.20917	4.23674	4.20526	4.26371	6.27822	6.25679	6.37578		2	baIEA_QU_covid_S3		0	0.141849	1.81892	1.79307	1.82501	2.44329	2.42124	2.46022	3.68565	3.67087	3.74354			InvE QU		0	0.141849	1.81892	1.79307	1.82501	2.44329	2.42124	2.46022	3.68565	3.67087	3.74354
3	baIEA_SO_covid_S3			0	2.97255	2.9351	2.98087	4.00844	3.97696	4.03541	6.04992	6.02848	6.14748		3	baIEA_SO_covid_S3			0	1.67707	1.65122	1.68317	2.30144	2.27939	2.31837	3.5438	3.52902	3.60169			InvE SO			0	1.67707	1.65122	1.68317	2.30144	2.27939	2.31837	3.5438	3.52902	3.60169
4	ba_covid_S3				0	-0.037444	0.00832291	1.03589	1.00441	1.06286	3.07737	3.05594	3.17493		4	ba_covid_S3				0	-0.0258511	0.00609479	0.624371	0.602316	0.641303	1.86673	1.85195	1.92462			TDT				0	-0.0258511	0.00609479	0.624371	0.602316	0.641303	1.86673	1.85195	1.92462
5	ba_QU_covid_S3					0	0.0457669	1.07334	1.04186	1.10031	3.11481	3.09338	3.21238		5	ba_QU_covid_S3					0	0.0319459	0.650222	0.628167	0.667154	1.89258	1.8778	1.95047			TDT QU					0	0.0319459	0.650222	0.628167	0.667154	1.89258	1.8778	1.95047
6	ba_SO_covid_S3						0	1.02757	0.99609	1.05454	3.06905	3.04762	3.16661		6	ba_SO_covid_S3						0	0.618276	0.596221	0.635208	1.86063	1.84585	1.91852			TDT SO						0	0.618276	0.596221	0.635208	1.86063	1.84585	1.91852
7	2C_covid_S3							0	-0.0314813	0.0269705	2.04148	2.02004	2.13904		7	2C_covid_S3							0	-0.0220546	0.0169318	1.24236	1.22758	1.30025			EU-EA N-Z							0	-0.0220546	0.0169318	1.24236	1.22758	1.30025
8	2C_QU_covid_S3								0	0.0584518	2.07296	2.05153	2.17052		8	2C_QU_covid_S3								0	0.0389864	1.26441	1.24963	1.3223			EU-EA N-Z QU								0	0.0389864	1.26441	1.24963	1.3223
9	2C_SO_covid_S3									0	2.01451	1.99307	2.11207		9	2C_SO_covid_S3									0	1.22542	1.21064	1.28331			EU-EA N-Z SO									0	1.22542	1.21064	1.28331
10	1-5C_covid_S3										0	-0.021432	0.0975632		10	1-5C_covid_S3										0	-0.0147806	0.0578901			Net Zero										0	-0.0147806	0.0578901
11	1-5C_QU_covid_S3											0	0.118995		11	1-5C_QU_covid_S3											0	0.0726707			NetZero QU											0	0.0726707
12	1-5C_SO_covid_S3												0		12	1-5C_SO_covid_S3												0			NetZero SO												0
		1	2	3	4	5	6	7	8	9	10	11	12				1	2	3	4	5	6	7	8	9	10	11	12			GDP
	GDP	baIEA_covid_S3	baIEA_QU_covid_S3	baIEA_SO_covid_S3	ba_covid_S3	ba_QU_covid_S3	ba_SO_covid_S3	2C_covid_S3	2C_QU_covid_S3	2C_SO_covid_S3	1-5C_covid_S3	1-5C_QU_covid_S3	1-5C_SO_covid_S3			GDP	baIEA_covid_S3	baIEA_QU_covid_S3	baIEA_SO_covid_S3	ba_covid_S3	ba_QU_covid_S3	ba_SO_covid_S3	2C_covid_S3	2C_QU_covid_S3	2C_SO_covid_S3	1-5C_covid_S3	1-5C_QU_covid_S3	1-5C_SO_covid_S3			Total	InvE	InvE QU	InvE SO	TDT	TDT QU	TDT SO	EU-EA N-Z	EU-EA N-Z QU	EU-EA N-Z SO	Net Zero	NetZero QU	NetZero SO
1	baIEA_covid_S3	0	-1.36513	1.11984	-17.9856	-18.3837	-17.7888	-52.637	-53.1005	-52.0225	-64.0997	-63.8695	-63.5541		1	baIEA_covid_S3	0	-0.833209	0.659757	-12.7647	-13.0258	-12.6473	-36.4175	-36.7098	-36.0388	-44.2589	-44.1526	-43.9677			InvE	0	-0.833209	0.659757	-12.7647	-13.0258	-12.6473	-36.4175	-36.7098	-36.0388	-44.2589	-44.1526	-43.9677
2	baIEA_QU_covid_S3		0	2.48497	-16.6205	-17.0186	-16.4237	-51.2718	-51.7353	-50.6574	-62.7346	-62.5044	-62.1889		2	baIEA_QU_covid_S3		0	1.49297	-11.9315	-12.1926	-11.8141	-35.5843	-35.8766	-35.2056	-43.4257	-43.3194	-43.1345			InvE QU		0	1.49297	-11.9315	-12.1926	-11.8141	-35.5843	-35.8766	-35.2056	-43.4257	-43.3194	-43.1345
3	baIEA_SO_covid_S3			0	-19.1055	-19.5035	-18.9087	-53.7568	-54.2203	-53.1423	-65.2195	-64.9894	-64.6739		3	baIEA_SO_covid_S3			0	-13.4244	-13.6855	-13.307	-37.0772	-37.3695	-36.6985	-44.9186	-44.8124	-44.6274			InvE SO			0	-13.4244	-13.6855	-13.307	-37.0772	-37.3695	-36.6985	-44.9186	-44.8124	-44.6274
4	ba_covid_S3				0	-0.398065	0.196796	-34.6513	-35.1148	-34.0369	-46.1141	-45.8839	-45.5684		4	ba_covid_S3				0	-0.261098	0.117412	-23.6528	-23.9451	-23.2741	-31.4942	-31.388	-31.203			TDT				0	-0.261098	0.117412	-23.6528	-23.9451	-23.2741	-31.4942	-31.388	-31.203
5	ba_QU_covid_S3					0	0.59486	-34.2533	-34.7168	-33.6388	-45.716	-45.4858	-45.1704		5	ba_QU_covid_S3					0	0.37851	-23.3917	-23.684	-23.013	-31.2331	-31.1269	-30.9419			TDT QU					0	0.37851	-23.3917	-23.684	-23.013	-31.2331	-31.1269	-30.9419
6	ba_SO_covid_S3						0	-34.8481	-35.3116	-34.2337	-46.3109	-46.0807	-45.7652		6	ba_SO_covid_S3						0	-23.7702	-24.0625	-23.3915	-31.6116	-31.5054	-31.3204			TDT SO						0	-23.7702	-24.0625	-23.3915	-31.6116	-31.5054	-31.3204
7	2C_covid_S3							0	-0.463497	0.614479	-11.4627	-11.2326	-10.9171		7	2C_covid_S3							0	-0.292294	0.378675	-7.84143	-7.73518	-7.5502			EU-EA N-Z							0	-0.292294	0.378675	-7.84143	-7.73518	-7.5502
8	2C_QU_covid_S3								0	1.07798	-10.9992	-10.7691	-10.4536		8	2C_QU_covid_S3								0	0.670969	-7.54913	-7.44288	-7.2579			EU-EA N-Z QU								0	0.670969	-7.54913	-7.44288	-7.2579
9	2C_SO_covid_S3									0	-12.0772	-11.847	-11.5316		9	2C_SO_covid_S3									0	-8.2201	-8.11385	-7.92887			EU-EA N-Z SO									0	-8.2201	-8.11385	-7.92887
10	1-5C_covid_S3										0	0.230157	0.545641		10	1-5C_covid_S3										0	0.10625	0.291229			Net Zero										0	0.10625	0.291229
11	1-5C_QU_covid_S3											0	0.315484		11	1-5C_QU_covid_S3											0	0.184979			NetZero QU											0	0.184979
12	1-5C_SO_covid_S3												0		12	1-5C_SO_covid_S3												0			NetZero SO												0
	Undiscounted												Discounted
		Coal	Oil	Gas	Total	GDP	Invest.	Govt	Exports FF	InvestFF	FF-Prod			Coal	Oil	Gas	Total	GDP	Invest.	Govt	Exports FF	InvestFF	FF-Prod
	Scenario 1	baIEA_covid_S3	baIEA_covid_S3	baIEA_covid_S3	baIEA_covid_S3	baIEA_covid_S3	baIEA_covid_S3	baIEA_covid_S3	baIEA_covid_S3	baIEA_covid_S3	baIEA_covid_S3		Scenario 1	baIEA_covid_S3	baIEA_covid_S3	baIEA_covid_S3	baIEA_covid_S3	baIEA_covid_S3	baIEA_covid_S3	baIEA_covid_S3	baIEA_covid_S3	baIEA_covid_S3	baIEA_covid_S3
	Scenario 2	2C_QU_covid_S3	2C_QU_covid_S3	2C_QU_covid_S3	2C_QU_covid_S3	2C_QU_covid_S3	2C_QU_covid_S3	2C_QU_covid_S3	2C_QU_covid_S3	2C_QU_covid_S3	2C_QU_covid_S3		Scenario 2	2C_QU_covid_S3	2C_QU_covid_S3	2C_QU_covid_S3	2C_QU_covid_S3	2C_QU_covid_S3	2C_QU_covid_S3	2C_QU_covid_S3	2C_QU_covid_S3	2C_QU_covid_S3	2C_QU_covid_S3
1	1 Belgium	3.77175	0	0.000649026	3.7724	-228953	-184568	0	0	0	0	1	1 Belgium	2.37434	0	0.000372138	2.37472	-150110	-125957	0	0	0	0
2	2 Denmark	0.0465944	5042.63	11793	16835.7	-86039.8	-120408	0	1786.48	9942.89	31750.9	2	2 Denmark	0.0295873	3184.18	6707.7	9891.91	-75058.9	-83154.6	0	913.676	5794.36	18494.2
3	3 Germany	11272.4	3738.87	15091	30102.3	-2.85479e+06	-2.25166e+06	0	0	0	62909.7	3	3 Germany	7163.21	2248.1	8621.88	18033.2	-1.98678e+06	-1.58467e+06	0	0	0	38363
4	4 Greece	1860.1	145.862	2.32685	2008.29	-68671.5	-118918	0	9081.51	0	0	4	4 Greece	1177.99	87.3414	1.31854	1266.65	-46357.4	-80664.3	0	5575.03	0	0
5	5 Spain	203.991	687.183	259.607	1150.78	-1.338e+06	-589981	0	0	0	0	5	5 Spain	129.615	409.39	146.225	685.23	-841838	-396046	0	0	0	0
6	6 France	0.0144495	3994.83	60.9109	4055.75	-1.3768e+06	-1.30013e+06	0	0	0	0	6	6 France	0.00918781	2362.66	34.5008	2397.17	-909141	-881481	0	0	0	0
7	7 Ireland	0.00460608	0.0769023	1488.22	1488.3	-129235	-98866.3	0	7025.18	6682.63	18360.6	7	7 Ireland	0.0029038	0.0458265	877.707	877.756	-90661.6	-71040.9	0	4186.99	3959.61	10871.9
8	8 Italy	0.0555828	18207.4	1879.69	20087.1	-965326	-1.14945e+06	0	0	0	32216.2	8	8 Italy	0.0353144	10741.2	1104.52	11845.8	-695990	-812118	0	0	0	19046.6
9	9 Luxembourg	0	0.207114	0	0.207114	-38736.2	-15169.4	0	0	0	0	9	9 Luxembourg	0	0.121589	0	0.121589	-22564.4	-10242.4	0	0	0	0
10	10 Netherlands	0.32509	1483.71	43937.9	45422	-912569	-660905	0	0	0	80204.7	10	10 Netherlands	0.206437	903.295	25442.7	26346.2	-602583	-452715	0	0	0	46668.6
11	11 Austria	0	449.885	312.998	762.883	-123237	-148742	0	0	0	1365.31	11	11 Austria	0	271.334	191.683	463.017	-76065.9	-100010	0	0	0	837.253
12	12 Portugal	0	0	0.00153565	0.00153565	-227372	-288292	0	0	0	0	12	12 Portugal	0	0	0.000720506	0.000720506	-144080	-190447	0	0	0	0
13	13 Finland	0	0	0	0	-169670	-186057	0	0	-0.000429	-0.045617	13	13 Finland	0	0	0	0	-117111	-128768	0	0	-0.000364454	-0.0396683
14	14 Sweden	0.000752828	1.95297	0.00129805	1.95503	-416265	-372951	0	0	0	0	14	14 Sweden	0.000470366	1.15155	0.000744276	1.15277	-271913	-252714	0	0	0	0
15	15 UK	689.149	48443.8	62321.8	111455	-1.46064e+06	-1.50716e+06	0	190056	20675.9	228118	15	15 UK	437.704	29331.6	35711.5	65480.8	-955329	-1.02603e+06	0	108301	12077	133147
16	16 Czech Republic	4019.97	125.256	233.993	4379.22	-279831	-174757	0	-5607.79	2454.26	24867.1	16	16 Czech Republic	2573.8	77.6655	145.545	2797.01	-178093	-118133	0	-3069.56	1567.07	15931.5
17	17 Estonia	0	5.41918	0	5.41918	-17796.4	-18024.7	0	0	0.335478	5.85871	17	17 Estonia	0	3.19252	0	3.19252	-11797.4	-12446	0	0	0.198018	3.46468
18	18 Cyprus	0	0.109972	6.33094	6.44092	-1663.42	-10321.1	0	0	0	0	18	18 Cyprus	0	0.0664052	3.57308	3.63948	-864.91	-6916.14	0	0	0	0
19	19 Latvia	0	0.0067482	32.9577	32.9644	-91587.1	-16761.9	0	0	0	0	19	19 Latvia	0	0.00368498	18.5626	18.5663	-54688.7	-11362.1	0	0	0	0
20	20 Lithuania	0	164.723	12.9049	177.628	22866	-27443.9	0	-23.8481	0	0	20	20 Lithuania	0	98.9114	7.27192	106.183	12223.5	-18596.5	0	-19.398	0	0
21	21 Hungary	322.14	338.957	298.934	960.031	-161359	-151210	0	0	0	211.636	21	21 Hungary	208.933	208.64	179.596	597.168	-105026	-103127	0	0	0	128.284
22	22 Malta	0	0	0	0	-3339.25	-6127.88	0	0	0	0	22	22 Malta	0	0	0	0	-1688.44	-4101.53	0	0	0	0
23	23 Poland	14213.5	763.868	11502.1	26479.5	-340866	-435377	0	21703.3	11253.7	112086	23	23 Poland	9037.86	464.837	6519.64	16022.3	-219018	-294565	0	10899.3	6961.64	68619.8
24	24 Slovenia	200.528	0.000844653	6.6434	207.173	-40040.6	-23554.5	0	0	0	0	24	24 Slovenia	130.263	0.000506855	3.81228	134.076	-24047.9	-15915.6	0	0	0	0
25	25 Slovakia	9.19589	49.4787	88.873	147.548	-143992	-92887.5	0	0	8.90375	116.678	25	25 Slovakia	5.90018	29.2217	50.5183	85.6402	-94976	-64643.9	0	0	5.67587	74.601
26	26 Bulgaria	1332.51	96.3514	203.19	1632.05	-100634	-111295	0	0	0	5369.37	26	26 Bulgaria	850.109	56.834	117.178	1024.12	-72544.2	-80465.5	0	0	0	3416.07
27	27 Romania	1045.11	2005.93	4797.78	7848.82	-183580	-208997	0	4508.3	346.147	17118.3	27	27 Romania	670.137	1230.12	2840.03	4740.28	-128311	-140740	0	2462.53	217.277	10602.4
28	28 Norway	122.64	40222	101370	141714	527753	168852	0	362370	241688	366074	28	28 Norway	79.2845	24776.1	58124.5	82979.9	294222	83410.1	0	210489	133789	212603
29	29 Switzerland	0	0.00916717	0	0.00916717	-249217	-271002	0	0	0	0	29	29 Switzerland	0	0.00549391	0	0.00549391	-158436	-183604	0	0	0	0
30	30 Iceland	0	0	0	0	-10854.7	-20047.8	0	0	0	0	30	30 Iceland	0	0	0	0	-6580.62	-13553.7	0	0	0	0
31	31 Croatia	0	332.194	296.051	628.245	-85365.3	-71576.7	0	0	58.2242	497.584	31	31 Croatia	0	209.775	178.394	388.169	-57190.5	-48772.4	0	0	36.9428	306.905
32	32 Turkey	2562.31	5345.58	995.433	8903.33	-563249	-962413	0	0	9726.06	109273	32	32 Turkey	1710.57	3199.68	564.096	5474.34	-376543	-659880	0	0	6074.85	67584.4
33	33 Macedonia	0	0	0	0	-1851.8	-22202.1	0	0	0	0	33	33 Macedonia	0	0	0	0	-1867.46	-15357.5	0	0	0	0
34	34 USA	96042.3	1.88926e+06	1.48646e+06	3.47177e+06	5.3868e+06	-5.3377e+06	3.75627e+06	671742	587258	6.50795e+06	34	34 USA	61007.5	1.1175e+06	841848	2.02036e+06	2.35235e+06	-3.82897e+06	2.14579e+06	326268	349919	3.78485e+06
35	35 Japan	206.525	80.0839	187.943	474.552	-3.57961e+06	-2.95718e+06	0	0	0	0	35	35 Japan	131.216	49.4577	123.241	303.915	-2.4696e+06	-2.12441e+06	0	0	0	0
36	36 Canada	8226.83	646597	188658	843482	1.12643e+06	-1.00731e+06	307093	1.15324e+06	173248	1.41186e+06	36	36 Canada	5227.97	382882	107594	495704	594740	-710323	177095	689335	101743	829496
37	37 Australia	79959.4	29949.1	133040	242949	-1.01181e+06	-954377	0	-5278.97	13622.5	559038	37	37 Australia	50816.2	17799.6	75792.7	144409	-686555	-655138	0	-13921.8	8635.6	338116
38	38 New Zealand	448.394	928.12	1557.06	2933.58	-100870	-72231.1	0	0	766.114	22350.4	38	38 New Zealand	285.177	584.942	909.968	1780.09	-63101.8	-48189.9	0	0	470.096	13757.2
39	39 Russian Federation	57473.5	1.19033e+06	488392	1.7362e+06	-459204	-2.00516e+06	398045	904878	160736	768056	39	39 Russian Federation	36511.5	713446	280147	1.0301e+06	-356870	-1.30566e+06	230294	557349	92981	443065
40	40 Rest of Annex I	0	6888.52	203.786	7092.31	-48760.9	-58269	0	0	2530.09	7945.33	40	40 Rest of Annex I	0	4079.69	123.024	4202.72	-30706.7	-34610.9	0	0	1486.01	4725.04
41	41 China	437087	465101	292219	1.19441e+06	-2.19937e+07	-1.4588e+07	0	0	742363	2.22891e+06	41	41 China	279680	276943	166183	722806	-1.47983e+07	-1.03365e+07	0	0	432378	1.34897e+06
42	42 India	71621.5	21650	50742.7	144014	-6.31063e+06	-6.43959e+06	0	0	44566.4	258178	42	42 India	45645.8	13342.8	28918.8	87907.4	-4.08579e+06	-4.14102e+06	0	0	26249.6	155340
43	43 Mexico	1829.88	59334.6	90522.2	151687	-1.26253e+06	-1.30523e+06	0	0	5632.93	222292	43	43 Mexico	1167.84	36730.5	51372.8	89271.2	-814638	-842090	0	0	3222.07	129086
44	44 Brazil	725.777	225578	57567.8	283872	-2.14075e+06	-3.06746e+06	0	170128	166831	284980	44	44 Brazil	461.48	135368	32682.6	168512	-1.39337e+06	-2.01203e+06	0	134807	98763.6	170261
45	45 Argentina	3.82272	18338.2	99532.8	117875	-1.33468e+06	-886353	0	0	9595.06	29682.3	45	45 Argentina	2.42746	11404.4	56489	67895.8	-851868	-567396	0	0	5469.23	17045.5
46	46 Colombia	14496.9	26462.4	21142.2	62101.5	-372217	-520387	0	98836.1	8262.26	137276	46	46 Colombia	9358.1	16598.4	12077.3	38033.8	-265761	-361384	0	62284.4	5182.4	85155.6
47	47 Rest of Latin America	480.39	823279	150519	974278	-754128	-877284	0	0	139402	782610	47	47 Rest of Latin America	305.192	486546	85803.2	572654	-485939	-568479	0	0	81465.5	459964
48	48 Korea	210.079	5.98943	43.6912	259.759	-2.88865e+06	-2.08035e+06	0	0	0	0	48	48 Korea	133.638	4.28087	25.2927	163.212	-1.88629e+06	-1.39165e+06	0	0	0	0
49	49 Taiwan	0.00926822	0.0100118	0.00268616	0.0219662	-592857	-527806	0	0	0	0	49	49 Taiwan	0.0058724	0.00600077	0.00135682	0.01323	-385914	-349320	0	0	0	0
50	50 Indonesia	53411.3	25763.3	38666.1	117841	-650159	-1.02687e+06	134309	0	14840.2	480454	50	50 Indonesia	34625.3	15760.3	22678.3	73063.9	-456504	-683769	79557.7	0	9441.46	297493
51	51 Rest of ASEAN	558.603	38886.8	22783.1	62228.5	-1.80455e+06	-1.1092e+06	0	0	53135.1	261738	51	51 Rest of ASEAN	414.128	23660.9	13498.2	37573.2	-1.1045e+06	-755525	0	0	31438.2	145126
52	52 OPEC excl Venezuela	247.578	434026	218773	653047	-283677	-1.01369e+06	224335	541032	5875.19	572936	52	52 OPEC excl Venezuela	157.237	264082	138485	402724	-166291	-629813	134801	345740	3693.68	363186
53	53 Rest of world	15281.4	117326	109038	241645	-1.48606e+06	-945924	0	-190860	2407.55	446551	53	53 Rest of world	9721.17	70539.8	62787.8	143049	-898937	-617272	0	-37815.5	1465.38	263141
54	54 Ukraine	5549.06	5885.59	33039.5	44474.2	71295.8	32997.9	0	62659.1	28060.6	117315	54	54 Ukraine	3526.46	3487.28	18850.6	25864.4	41100.1	19723.2	0	35488.3	16511.4	70618.1
55	55 Saudi Arabia	0	224834	26605.7	251440	93031.3	-383078	109690	61529.4	794.026	124914	55	55 Saudi Arabia	0	136167	16337.7	152505	24603.7	-265511	63113.2	42007.8	517.234	77782.1
56	56 Nigeria	7.87078	59809.6	8227.32	68044.7	-24873.4	-33326.6	46732.3	-61469.5	2637.05	47661.1	56	56 Nigeria	4.99868	36706.2	4810.21	41521.4	-18679.1	-21819	26493.3	-36727.8	1653.34	28525.6
57	57 South Africa	36439.9	366.38	2952.67	39758.9	419015	-205493	0	438274	37367.6	595864	57	57 South Africa	23478.9	217.522	1673.74	25370.2	271961	-135045	0	283957	24537.6	383394
58	58 Rest of Africa	1421.14	126259	10074	137754	-1.20065e+06	-577535	0	4486.42	3018.86	146474	58	58 Rest of Africa	902.868	74806.4	5757.58	81466.9	-712674	-370507	0	2423.53	1779.04	86658.3
59	59 Africa OPEC	0.0240009	177616	256326	433941	-84927	-91992.8	15637.6	0	4912.94	58032.4	59	59 Africa OPEC	0.0152328	112178	149100	261278	-57872.2	-59556.5	9283.35	0	3013.71	35387.3
60	60 Malaysia	375.737	11663.5	20062.6	32101.9	-82775.1	-92087.9	0	22399.8	0	22399.8	60	60 Malaysia	239.586	7407.95	11903.5	19551	-55521.8	-61690.9	0	13593	0	13593.1
61	61 Kazakhstan	12395.4	216400	18805.5	247601	391956	-26450.6	0	214590	0	238031	61	61 Kazakhstan	7880.04	128356	10907	147143	221957	-18429.5	0	131152	0	141527
62	Total 2020$tn	932358	6.97427e+06	4.08313e+06	1.19898e+07	-5.31005e+07	-5.96057e+07	4.99212e+06	4.67709e+06	2.5107e+06	1.7424e+07	62	Total 2020$tn	595863	4.16654e+06	2.34447e+06	7.10688e+06	-3.67098e+07	-4.07812e+07	2.86643e+06	2.87568e+06	1.4725e+06	1.0333e+07
63	Total EU 2020$tn	35295.5	125969	255701	416965	-1.14704e+07	-1.03922e+07	0	590899	293052	980775	63	Total EU 2020$tn	22467.5	76486.1	146850	245803	-7.73521e+06	-7.18082e+06	0	339739	164371	578808
64	Total OPEC 2020$tn	255.473	671451	483326	1.15503e+06	-393478	-1.13901e+06	286705	479563	13425.2	678629	64	Total OPEC 2020$tn	162.251	412966	292395	705523	-242842	-711188	170578	309012	8360.73	427099
65	Total LatAm 2020$tn	16811	927414	361716	1.30594e+06	-3.72356e+06	-3.58926e+06	0	98836.1	162892	1.17186e+06	65	Total LatAm 2020$tn	10833.6	551279	205742	767855	-2.41821e+06	-2.33935e+06	0	62284.4	95339.2	691252
66	Total ROW 2020$tn	126091	550373	257226	933690	-7.97307e+06	-6.68922e+06	134309	551549	142126	2.33912e+06	66	Total ROW 2020$tn	81207.3	328905	149115	559227	-5.05913e+06	-4.44628e+06	79557.7	428798	87129.1	1.42003e+06

## Sheet: Game
0									Oil Price Scaling		1.414		Coal Price Scaling		1.414		GDP price deflator		1.3
									Gas Price Scaling		1.414		GDP Scaling		1.43		USD to Euro EX		1.1
	QU								SO								Scenarios table
TDT	Scenario 1	1		Discount rate		0.06		TDT	Scenario 1	1		Discount rate		0.06			1	baIEA_covid_S3
	Scenario 2	5		Time horizon	2022	2036			Scenario 2	6		Time horizon	2022	2036			2	baIEA_QU_covid_S3		InvE
		Loss	$2020bn	undiscounted						Loss	$2020bn	undiscounted					3	baIEA_SO_covid_S3
		Oil	Gas	Total	GDP	Invest.				Oil	Gas	Total	GDP	Invest.			4	ba_covid_S3
	Scenario 1	baIEA_covid_S3							Scenario 1	baIEA_covid_S3							5	ba_QU_covid_S3		TDT
	Scenario 2	ba_QU_covid_S3							Scenario 2	ba_SO_covid_S3							6	ba_SO_covid_S3
	Importers	-146.966	-220.594	-547.036	8366.75	7883.92			Importers	-170.805	-247.286	-598.006	8171.31	7821.35			7	2C_covid_S3
	High-cost exporters	-934.488	-875.881	-1871.7	-1383.2	1932.36			High-cost exporters	-1084.28	-977.879	-2123.64	-2016.07	1869.77			8	2C_QU_covid_S3		Eu-EA N-Z
	OPEC	-191.183	-262.796	-454.076	-39.8029	303.231			OPEC	-50.14	-130.685	-180.922	409.594	330.784			9	2C_SO_covid_S3
																	10	1-5C_covid_S3
Eu-EA N-Z	Scenario 1	1		Discount rate		0.06		Eu-EA N-Z	Scenario 1	1		Discount rate		0.06			11	1-5C_QU_covid_S3		Net-Zero
	Scenario 2	8		Time horizon	2022	2036			Scenario 2	9		Time horizon	2022	2036			12	1-5C_SO_covid_S3
		Loss	$2020bn	undiscounted						Loss	$2020bn	undiscounted
		Oil	Gas	Total	GDP	Invest.				Oil	Gas	Total	GDP	Invest.			Variable Switch: choose which variable for game
	Scenario 1	baIEA_covid_S3							Scenario 1	baIEA_covid_S3							Oil	Gas	Total	GDP	Invest.
	Scenario 2	2C_QU_covid_S3							Scenario 2	2C_SO_covid_S3										1
	Importers	-353.483	-313.182	-969.076	26889.4	21033.4			Importers	-433.601	-341.646	-1077.75	26520.6	20922.5
	High-cost exporters	-2213.83	-1229.59	-3546.17	-2590.22	5844.95			High-cost exporters	-2698.75	-1336.68	-4138.21	-4042.29	5667.43
	OPEC	-412.966	-292.395	-705.523	242.842	711.188			OPEC	59.8218	-161.148	-101.489	1182.47	770.274
Net-Zero	Scenario 1	1		Discount rate		0.06		Net-Zero	Scenario 1	1		Discount rate		0.06
	Scenario 2	11		Time horizon	2022	2036			Scenario 2	12		Time horizon	2022	2036
		Loss	$2020bn	undiscounted						Loss	$2020bn	undiscounted
		Oil	Gas	Total	GDP	Invest.				Oil	Gas	Total	GDP	Invest.
	Scenario 1	baIEA_covid_S3							Scenario 1	baIEA_covid_S3
	Scenario 2	1-5C_QU_covid_S3							Scenario 2	1-5C_SO_covid_S3
	Importers	-566.93	-495.885	-1435.21	25876	24165.5			Importers	-695.218	-532.466	-1600.07	25336.3	23993.6
	High-cost exporters	-3485.48	-1913.62	-5525.35	-4595.18	7538.8			High-cost exporters	-4199.69	-2052.67	-6378.6	-6350.39	7292.55
	OPEC	-679.514	-342.218	-1021.93	1550.61	1277.68			OPEC	-218.336	-216.262	-434.797	2748.28	1356.47
	Payoff matrix		OPEC
	Importers vs OPEC		QU		SO			NOTES	In this game, Importers choose whether or not to decarbonise
			Importers	OPEC	Importers	OPEC			OPEC choose whether to flood markets or not
	Importers	EU-EA-NZ	26889.4	242.842	26520.6	1182.47
		TDT	8366.75	-39.8029	8171.31	409.594
	Payoff matrix		High-cost exporters
	High-Cost exporters vs OPEC		EU-EA-NZ		Net-Zero				In this game, OPEC decides whether or not to flood markets.
			HCE	OPEC	HCE	OPEC			High-cost exporters decide whether or not to follow importers decarbonising
	OPEC	QU	-2590.22	242.842	-4595.18	1550.61
		SO	-4042.29	1182.47	-6350.39	2748.28
	Discounted								Discounted
		Coal	Oil	Gas	Total	GDP	Invest.			Coal	Oil	Gas	Total	GDP	Invest.
	Scenario 1	baIEA_covid_S3	baIEA_covid_S3	baIEA_covid_S3	baIEA_covid_S3	baIEA_covid_S3	baIEA_covid_S3		Scenario 1	baIEA_covid_S3	baIEA_covid_S3	baIEA_covid_S3	baIEA_covid_S3	baIEA_covid_S3	baIEA_covid_S3
	Scenario 2	ba_QU_covid_S3	ba_QU_covid_S3	ba_QU_covid_S3	ba_QU_covid_S3	ba_QU_covid_S3	ba_QU_covid_S3		Scenario 2	ba_QU_covid_S3	ba_QU_covid_S3	ba_QU_covid_S3	ba_QU_covid_S3	ba_QU_covid_S3	ba_QU_covid_S3
1	1 Belgium	1.64152	0	0.000244483	1.64176	-20552.4	-8216.03	1	1 Belgium	1.64451	0	0.000279554	1.64479	-20772.9	-8272.16
2	2 Denmark	0.0177771	1318.2	4771.01	6089.23	-62534.5	-29852.2	2	2 Denmark	0.0177556	1522.87	5328.67	6851.55	-60097.2	-29035.8
3	3 Germany	4309.76	874.739	5951.63	11136.1	-1.0816e+06	-531888	3	3 Germany	4320.08	1025.68	6708.85	12054.6	-1.08706e+06	-532295
4	4 Greece	808.699	36.3528	1.01786	846.069	3344.78	-10078.6	4	4 Greece	810.203	42.242	1.10945	853.555	2790.12	-10120.1
5	5 Spain	77.5192	176.05	107.947	361.516	-206492	-42710	5	5 Spain	77.7071	203.667	119.175	400.548	-210508	-43015.6
6	6 France	0.00550507	1005.74	24.6606	1030.4	-216547	-198834	6	6 France	0.00550676	1166.12	27.4917	1193.62	-216443	-198298
7	7 Ireland	0.00178371	0.0191519	622.908	622.929	-37426	-33109	7	7 Ireland	0.00178422	0.0222077	701.576	701.6	-36584.9	-32652.3
8	8 Italy	0.0210744	4624.8	741.461	5366.28	-247795	-181763	8	8 Italy	0.0211316	5354.71	848.593	6203.33	-249742	-181745
9	9 Luxembourg	0	0.0511707	0	0.0511707	-4825.66	86.0179	9	9 Luxembourg	0	0.0618752	0	0.0618752	-5008.35	93.6107
10	10 Netherlands	0.123471	354.634	18079.7	18434.4	-344819	-202692	10	10 Netherlands	0.123718	414.842	20259	20673.9	-339433	-202362
11	11 Austria	0	104.255	131.591	235.845	27449.5	-9829.51	11	11 Austria	0	122.551	150.505	273.056	26967.7	-9839.64
12	12 Portugal	0	0	0.000720506	0.000720506	-81636.1	-129686	12	12 Portugal	0	0	0.000720506	0.000720506	-82024.3	-129713
13	13 Finland	0	0	0	0	-57709.7	-51807.3	13	13 Finland	0	0	0	0	-57838.8	-51847.8
14	14 Sweden	3.1794e-05	0.496707	0.000488965	0.497227	-188761	-125639	14	14 Sweden	3.18921e-05	0.574161	0.000559108	0.574752	-188559	-125638
15	15 UK	261.217	11752.7	25428	37442	-177380	-232246	15	15 UK	261.852	13717	28427.4	42406.3	-165670	-230958
16	16 Czech Republic	1520.08	34.6537	104.996	1659.73	-33730.7	-10053.1	16	16 Czech Republic	1523.83	39.6592	117.953	1681.44	-34047.8	-10048
17	17 Estonia	0	1.37848	0	1.37848	-5255.11	-712.986	17	17 Estonia	0	1.59654	0	1.59654	-5307.82	-714.535
18	18 Cyprus	0	0.025755	2.60774	2.6335	16019.6	-752.331	18	18 Cyprus	0	0.0292127	2.88858	2.91779	15946.9	-753.377
19	19 Latvia	0	0.00368498	13.7054	13.7091	-20795.6	-882.373	19	19 Latvia	0	0.00368498	15.1305	15.1342	-20873.6	-883.699
20	20 Lithuania	0	38.8271	5.35511	44.1822	3292.15	-1241.99	20	20 Lithuania	0	45.4962	5.91565	51.4119	3185.97	-1244.3
21	21 Hungary	122.686	82.6218	122.633	327.941	-15120.9	-23631.6	21	21 Hungary	122.99	96.5284	140.861	360.379	-15300.2	-23591.3
22	22 Malta	0	0	0	0	1381.99	-1896.12	22	22 Malta	0	0	0	0	1378.84	-1902.66
23	23 Poland	5386.53	187.413	4650.39	10224.3	42807.5	-17954.9	23	23 Poland	5399.65	218.559	5187.77	10806	43764.9	-17863.6
24	24 Slovenia	75.9113	0.00018706	2.5313	78.4428	-2911.54	-1516.29	24	24 Slovenia	76.1019	0.000221115	2.88791	78.99	-2942.07	-1516.69
25	25 Slovakia	3.86273	13.0427	37.9972	54.9027	-46638.6	-25455	25	25 Slovakia	3.871	15.0186	41.8074	60.697	-46622.6	-25454.2
26	26 Bulgaria	504.71	24.6379	86.6994	616.047	-23394.6	-22423.4	26	26 Bulgaria	505.946	28.4977	95.8166	630.26	-23499.8	-22443.7
27	27 Romania	395.966	498.034	1967.29	2861.29	14951.5	-19936.2	27	27 Romania	396.941	579.776	2230.78	3207.5	15197	-19861.5
28	28 Norway	46.3456	9372.71	40797.6	50216.7	224661	94559.2	28	28 Norway	46.4614	11024.4	45821.8	56892.7	252629	104729
29	29 Switzerland	0	0.00140115	0	0.00140115	-80167.5	-48457	29	29 Switzerland	0	0.00198239	0	0.00198239	-80318.3	-48449.3
30	30 Iceland	0	0	0	0	-1293.4	-601.554	30	30 Iceland	0	0	0	0	-1300.76	-599.327
31	31 Croatia	0	86.2862	122.547	208.833	-30294.8	-2375.33	31	31 Croatia	0	99.8612	140.638	240.499	-30316.2	-2377.4
32	32 Turkey	966.878	1355.14	402.958	2724.97	-68463.6	-50465.5	32	32 Turkey	969.414	1570.66	449.318	2989.39	-70510.2	-50645.3
33	33 Macedonia	0	0	0	0	252.108	-543.013	33	33 Macedonia	0	0	0	0	239.115	-542.783
34	34 USA	36420.5	476190	608068	1.12068e+06	979478	-1.47532e+06	34	34 USA	36509	552009	675858	1.26438e+06	1.45011e+06	-1.44101e+06
35	35 Japan	78.3309	18.775	90.2588	187.365	-597289	-848316	35	35 Japan	78.5212	22.0738	103.854	204.449	-595998	-846181
36	36 Canada	3118.81	161135	75019.5	239273	404109	64829.6	36	36 Canada	3126.4	187111	84306.3	274544	495962	77685.4
37	37 Australia	30313.2	7464.77	52981.5	90759.4	-325388	-214431	37	37 Australia	30386.9	8669.73	59484.1	98540.7	-313479	-213734
38	38 New Zealand	170.524	239.674	621.96	1032.16	-10413	317.773	38	38 New Zealand	170.937	277.549	707.979	1156.46	-10606.1	299.218
39	39 Russian Federation	21791.8	297163	192793	511748	-389.34	-521875	39	39 Russian Federation	21844.8	345156	217715	584716	69991.4	-506446
40	40 Rest of Annex I	0	1750.2	84.9546	1835.16	-37038.7	-34160.7	40	40 Rest of Annex I	0	2026.69	96.3594	2123.05	-27444.1	-35442.6
41	41 China	165803	116443	116836	399081	-4.11327e+06	-4.54609e+06	41	41 China	166209	135160	130927	432297	-3.95693e+06	-4.49957e+06
42	42 India	27200.4	5032.11	20431	52663.5	-2.9482e+06	-1.87436e+06	42	42 India	27266.6	5919.14	22870.9	56056.6	-2.94223e+06	-1.87107e+06
43	43 Mexico	694.859	14185.8	36507	51387.7	-269255	-226514	43	43 Mexico	696.554	16624.1	40774.7	58095.4	-259690	-225218
44	44 Brazil	275.956	55459.6	23218.1	78953.7	-248227	-425930	44	44 Brazil	276.625	64570	25935.3	90782	-233271	-418355
45	45 Argentina	1.45657	4479.53	40118.4	44599.4	-201687	-143730	45	45 Argentina	1.46007	5228.04	44816	50045.5	-201063	-143274
46	46 Colombia	5560.86	7303.79	8590.6	21455.3	-226546	-274368	46	46 Colombia	5574.4	8365.71	9600.62	23540.7	-223782	-274131
47	47 Rest of Latin America	182.417	208059	60831.3	269073	-464881	-346003	47	47 Rest of Latin America	182.859	241091	68035.3	309309	-424230	-338640
48	48 Korea	79.835	2.60524	16.3822	98.8224	-1.03271e+06	-620287	48	48 Korea	80.0285	2.80328	18.8648	101.697	-1.03028e+06	-619302
49	49 Taiwan	0.00353424	0.00214702	0.00122917	0.00691043	-232290	-120679	49	49 Taiwan	0.00356064	0.0027308	0.00126424	0.00755568	-232191	-120401
50	50 Indonesia	20139.6	6259.09	15039.7	41438.4	-419211	-296305	50	50 Indonesia	20190.3	7311.31	17241.3	44742.9	-415468	-295244
51	51 Rest of ASEAN	187.925	9918.84	9329.19	19436	-505204	6156.17	51	51 Rest of ASEAN	188.645	11494.6	10613	22296.2	-499148	8619.06
52	52 OPEC excl Venezuela	94.0083	126309	130727	257130	46343.4	-302970	52	52 OPEC excl Venezuela	94.2362	35620	32815.2	68529.5	-407048	-330850
53	53 Rest of world	5811.24	27628.2	41665.5	75105	-341970	10213.2	53	53 Rest of world	5825.32	32378.7	47587.5	85791.5	-321465	10405.8
54	54 Ukraine	2109.87	1471.03	13197.3	16778.2	29067.6	15677.7	54	54 Ukraine	2114.97	1707.68	14813.1	18635.7	33765.1	16812.6
55	55 Saudi Arabia	0	80058.7	13543.1	93601.8	99651.5	-1341.5	55	55 Saudi Arabia	0	36439.6	6013.2	42452.8	-40529.9	-6054.43
56	56 Nigeria	2.98863	14495.5	3158.02	17656.5	-11023.1	-5938.95	56	56 Nigeria	2.99582	16938.5	3638.96	20580.5	-7175.42	-5606.13
57	57 South Africa	13992.2	89.084	1191.23	15272.5	236839	24052.8	57	57 South Africa	14026.1	103.781	1329.74	15459.6	237772	24046.5
58	58 Rest of Africa	538.899	31768.4	3906.06	36213.4	-232213	-677.61	58	58 Rest of Africa	540.209	36838.3	4424.21	41802.8	-233431	-663.886
59	59 Africa OPEC	0.00912221	50378.6	128911	179290	4482.54	5678.42	59	59 Africa OPEC	0.0091503	-2418.5	94230.9	91812.4	4628.67	5672.16
60	60 Malaysia	142.457	2916.01	7934.85	10993.3	-3811.12	-3550.12	60	60 Malaysia	142.805	3398.07	9120.85	12661.7	-2656.21	-3580.72
61	61 Kazakhstan	4704.98	53655.7	7317.06	65677.7	117255	4641.55	61	61 Kazakhstan	4716.41	62356.6	8346.84	75419.9	127299	4587.13
62	Total 2020$tn	353898	1.79182e+06	1.71631e+06	3.86202e+06	-1.30258e+07	-1.40739e+07	62	Total 2020$tn	354763	1.85169e+06	1.74825e+06	3.95471e+06	-1.26473e+07	-1.39565e+07
63	Total EU 2020$tn	13515.1	30501.4	103652	147668	-2.62348e+06	-1.86922e+06	63	Total EU 2020$tn	13547.4	35619.9	116236	165403	-2.5881e+06	-1.8563e+06
64	Total OPEC 2020$tn	97.0061	191183	262796	454076	39802.9	-303231	64	Total OPEC 2020$tn	97.2412	50140	130685	180922	-409594	-330784
65	Total LatAm 2020$tn	6439.6	234029	146047	386515	-1.16237e+06	-990615	65	Total LatAm 2020$tn	6455.27	271309	163227	440991	-1.10877e+06	-981263
66	Total ROW 2020$tn	47877.5	135699	100304	283881	-2.4317e+06	-1.0146e+06	66	Total ROW 2020$tn	47995.7	157896	114300	320192	-2.37385e+06	-1.00986e+06
	Discounted								Discounted
		Coal	Oil	Gas	Total	GDP	Invest.			Coal	Oil	Gas	Total	GDP	Invest.
	Scenario 1	High-cost exporters	High-cost exporters	High-cost exporters	High-cost exporters	High-cost exporters	High-cost exporters		Scenario 1	High-cost exporters	High-cost exporters	High-cost exporters	High-cost exporters	High-cost exporters	High-cost exporters
	Scenario 2	0	0	0	0	0	0		Scenario 2	0	0	0	0	0	0
1	1 Belgium	2.37434	0	0.000372138	2.37472	-150110	-125957	1	1 Belgium	2.37481	0	0.000414154	2.37522	-151039	-126037
2	2 Denmark	0.0295873	3184.18	6707.7	9891.91	-75058.9	-83154.6	2	2 Denmark	0.0295883	3984.04	7292.29	11276.4	-72619.8	-82275
3	3 Germany	7163.21	2248.1	8621.88	18033.2	-1.98678e+06	-1.58467e+06	3	3 Germany	7165.3	2824.3	9451.1	19440.7	-1.99779e+06	-1.58552e+06
4	4 Greece	1177.99	87.3414	1.31854	1266.65	-46357.4	-80664.3	4	4 Greece	1178.2	107.135	1.40358	1286.73	-47846.8	-80754.4
5	5 Spain	129.615	409.39	146.225	685.23	-841838	-396046	5	5 Spain	129.653	496.163	157.169	782.985	-850448	-396481
6	6 France	0.00918781	2362.66	34.5008	2397.17	-909141	-881481	6	6 France	0.00918815	2868.23	37.4346	2905.68	-909111	-879838
7	7 Ireland	0.0029038	0.0458265	877.707	877.756	-90661.6	-71040.9	7	7 Ireland	0.00290389	0.0576511	962.134	962.194	-89729.1	-70619.2
8	8 Italy	0.0353144	10741.2	1104.52	11845.8	-695990	-812118	8	8 Italy	0.0353157	12985.6	1228.25	14213.9	-698317	-812374
9	9 Luxembourg	0	0.121589	0	0.121589	-22564.4	-10242.4	9	9 Luxembourg	0	0.147979	0	0.147979	-22988	-10210.6
10	10 Netherlands	0.206437	903.295	25442.7	26346.2	-602583	-452715	10	10 Netherlands	0.206492	1133.05	27750.1	28883.3	-597493	-452705
11	11 Austria	0	271.334	191.683	463.017	-76065.9	-100010	11	11 Austria	0	341.274	213.459	554.733	-77038.1	-100026
12	12 Portugal	0	0	0.000720506	0.000720506	-144080	-190447	12	12 Portugal	0	0	0.000720506	0.000720506	-144844	-190465
13	13 Finland	0	0	0	0	-117111	-128768	13	13 Finland	0	0	0	0	-117520	-128885
14	14 Sweden	0.000470366	1.15155	0.000744276	1.15277	-271913	-252714	14	14 Sweden	0.000470378	1.3917	0.000828308	1.393	-272129	-252844
15	15 UK	437.704	29331.6	35711.5	65480.8	-955329	-1.02603e+06	15	15 UK	437.835	36508.3	38861.9	75808	-934089	-1.02391e+06
16	16 Czech Republic	2573.8	77.6655	145.545	2797.01	-178093	-118133	16	16 Czech Republic	2574.59	94.6205	159.766	2828.98	-178765	-118095
17	17 Estonia	0	3.19252	0	3.19252	-11797.4	-12446	17	17 Estonia	0	3.85448	0	3.85448	-11908.7	-12443.2
18	18 Cyprus	0	0.0664052	3.57308	3.63948	-864.91	-6916.14	18	18 Cyprus	0	0.0834777	3.85336	3.93684	-980.115	-6915.38
19	19 Latvia	0	0.00368498	18.5626	18.5663	-54688.7	-11362.1	19	19 Latvia	0	0.00368498	19.9504	19.9541	-54861.7	-11363.3
20	20 Lithuania	0	98.9114	7.27192	106.183	12223.5	-18596.5	20	20 Lithuania	0	123.519	7.82164	131.34	12001.2	-18599.9
21	21 Hungary	208.933	208.64	179.596	597.168	-105026	-103127	21	21 Hungary	208.997	260.859	200.173	670.029	-105481	-103072
22	22 Malta	0	0	0	0	-1688.44	-4101.53	22	22 Malta	0	0	0	0	-1705.46	-4112.98
23	23 Poland	9037.86	464.837	6519.64	16022.3	-219018	-294565	23	23 Poland	9040.58	576.661	7078.88	16696.1	-218518	-294380
24	24 Slovenia	130.263	0.000506855	3.81228	134.076	-24047.9	-15915.6	24	24 Slovenia	130.304	0.000647604	4.22434	134.529	-24210.8	-15914
25	25 Slovakia	5.90018	29.2217	50.5183	85.6402	-94976	-64643.9	25	25 Slovakia	5.90143	34.9509	54.1917	95.044	-95142.9	-64618.2
26	26 Bulgaria	850.109	56.834	117.178	1024.12	-72544.2	-80465.5	26	26 Bulgaria	850.367	68.5635	126.16	1045.09	-72780.5	-80510.4
27	27 Romania	670.137	1230.12	2840.03	4740.28	-128311	-140740	27	27 Romania	670.343	1530.34	3133.4	5334.08	-128189	-140524
28	28 Norway	79.2845	24776.1	58124.5	82979.9	294222	83410.1	28	28 Norway	79.3094	31407.3	63518.9	95005.4	336470	99241.8
29	29 Switzerland	0	0.00549391	0	0.00549391	-158436	-183604	29	29 Switzerland	0	0.00549391	0	0.00549391	-158975	-183589
30	30 Iceland	0	0	0	0	-6580.62	-13553.7	30	30 Iceland	0	0	0	0	-6592.55	-13547.7
31	31 Croatia	0	209.775	178.394	388.169	-57190.5	-48772.4	31	31 Croatia	0	261.915	198.699	460.614	-57267	-48776.1
32	32 Turkey	1710.57	3199.68	564.096	5474.34	-376543	-659880	32	32 Turkey	1711.14	3900.49	612.23	6223.86	-380990	-660164
33	33 Macedonia	0	0	0	0	-1867.46	-15357.5	33	33 Macedonia	0	0	0	0	-1890.05	-15354.8
34	34 USA	61007.5	1.1175e+06	841848	2.02036e+06	2.35235e+06	-3.82897e+06	34	34 USA	61025.8	1.35665e+06	911172	2.32885e+06	3.41381e+06	-3.71358e+06
35	35 Japan	131.216	49.4577	123.241	303.915	-2.4696e+06	-2.12441e+06	35	35 Japan	131.255	62.6048	139.24	333.1	-2.47005e+06	-2.1225e+06
36	36 Canada	5227.97	382882	107594	495704	594740	-710323	36	36 Canada	5229.54	466774	117684	589687	819650	-681300
37	37 Australia	50816.2	17799.6	75792.7	144409	-686555	-655138	37	37 Australia	50831.5	21744.2	82802.4	155378	-686949	-664281
38	38 New Zealand	285.177	584.942	909.968	1780.09	-63101.8	-48189.9	38	38 New Zealand	285.262	731.413	1005.45	2022.13	-63727.1	-48238.6
39	39 Russian Federation	36511.5	713446	280147	1.0301e+06	-356870	-1.30566e+06	39	39 Russian Federation	36522.5	875325	307826	1.21967e+06	-191170	-1.27255e+06
40	40 Rest of Annex I	0	4079.69	123.024	4202.72	-30706.7	-34610.9	40	40 Rest of Annex I	0	4942.43	135.807	5078.24	-30617.9	-33881.7
41	41 China	279680	276943	166183	722806	-1.47983e+07	-1.03365e+07	41	41 China	279765	338183	181216	799163	-1.44755e+07	-1.02489e+07
42	42 India	45645.8	13342.8	28918.8	87907.4	-4.08579e+06	-4.14102e+06	42	42 India	45659.5	16951.2	31509.6	94120.3	-4.08666e+06	-4.13779e+06
43	43 Mexico	1167.84	36730.5	51372.8	89271.2	-814638	-842090	43	43 Mexico	1168.19	46333.9	55844.4	103347	-799048	-839941
44	44 Brazil	461.48	135368	32682.6	168512	-1.39337e+06	-2.01203e+06	44	44 Brazil	461.618	166959	35535	202956	-1.36026e+06	-1.99319e+06
45	45 Argentina	2.42746	11404.4	56489	67895.8	-851868	-567396	45	45 Argentina	2.42813	14390.7	61419.1	75812.2	-855991	-567726
46	46 Colombia	9358.1	16598.4	12077.3	38033.8	-265761	-361384	46	46 Colombia	9360.89	20369.8	13138.7	42869.3	-261574	-361055
47	47 Rest of Latin America	305.192	486546	85803.2	572654	-485939	-568479	47	47 Rest of Latin America	305.283	589770	93409	683485	-382413	-549646
48	48 Korea	133.638	4.28087	25.2927	163.212	-1.88629e+06	-1.39165e+06	48	48 Korea	133.678	5.1396	28.3112	167.129	-1.88241e+06	-1.38972e+06
49	49 Taiwan	0.0058724	0.00600077	0.00135682	0.01323	-385914	-349320	49	49 Taiwan	0.00587261	0.00614152	0.00139884	0.013413	-388259	-349063
50	50 Indonesia	34625.3	15760.3	22678.3	73063.9	-456504	-683769	50	50 Indonesia	34636.3	19679.6	25253.5	79569.5	-443216	-681703
51	51 Rest of ASEAN	414.128	23660.9	13498.2	37573.2	-1.1045e+06	-755525	51	51 Rest of ASEAN	414.342	29057.7	14925.8	44397.8	-1.0881e+06	-749995
52	52 OPEC excl Venezuela	157.237	264082	138485	402724	-166291	-629813	52	52 OPEC excl Venezuela	157.284	-81405.2	33561	-47686.9	-1.12139e+06	-690147
53	53 Rest of world	9721.17	70539.8	62787.8	143049	-898937	-617272	53	53 Rest of world	9724.07	88302.1	69734.1	167760	-863272	-617298
54	54 Ukraine	3526.46	3487.28	18850.6	25864.4	41100.1	19723.2	54	54 Ukraine	3527.51	4246.42	20589.8	28363.7	42672	20214.7
55	55 Saudi Arabia	0	136167	16337.7	152505	24603.7	-265511	55	55 Saudi Arabia	0	-3676.73	4347.5	670.771	-426070	-287054
56	56 Nigeria	4.99868	36706.2	4810.21	41521.4	-18679.1	-21819	56	56 Nigeria	5.00016	45971.3	5373.74	51350.1	-3799.65	-20546.9
57	57 South Africa	23478.9	217.522	1673.74	25370.2	271961	-135045	57	57 South Africa	23485.9	268.389	1818.35	25572.6	272925	-135122
58	58 Rest of Africa	902.868	74806.4	5757.58	81466.9	-712674	-370507	58	58 Rest of Africa	903.139	90959.6	6348.24	98210.9	-716943	-370599
59	59 Africa OPEC	0.0152328	112178	149100	261278	-57872.2	-59556.5	59	59 Africa OPEC	0.0152334	-24387.9	122214	97825.7	-57274.9	-59580.1
60	60 Malaysia	239.586	7407.95	11903.5	19551	-55521.8	-61690.9	60	60 Malaysia	239.659	9360.51	13275	22875.2	-53549.7	-61788.1
61	61 Kazakhstan	7880.04	128356	10907	147143	221957	-18429.5	61	61 Kazakhstan	7882.4	156884	12080.2	176846	253201	-18522.1
62	Total 2020$tn	595863	4.16654e+06	2.34447e+06	7.10688e+06	-3.67098e+07	-4.07812e+07	62	Total 2020$tn	596043	4.35397e+06	2.38346e+06	7.33347e+06	-3.60388e+07	-4.05312e+07
63	Total EU 2020$tn	22467.5	76486.1	146850	245803	-7.73521e+06	-7.18082e+06	63	Total EU 2020$tn	22474	95350.4	160262	278087	-7.69264e+06	-7.16139e+06
64	Total OPEC 2020$tn	162.251	412966	292395	705523	-242842	-711188	64	Total OPEC 2020$tn	162.299	-59821.8	161148	101489	-1.18247e+06	-770274
65	Total LatAm 2020$tn	10833.6	551279	205742	767855	-2.41821e+06	-2.33935e+06	65	Total LatAm 2020$tn	10836.8	670865	223811	905513	-2.29903e+06	-2.31837e+06
66	Total ROW 2020$tn	81207.3	328905	149115	559227	-5.05913e+06	-4.44628e+06	66	Total ROW 2020$tn	81232.3	404437	165195	650864	-4.9613e+06	-4.43572e+06
	Discounted								Discounted
		Coal	Oil	Gas	Total	GDP	Invest.			Coal	Oil	Gas	Total	GDP	Invest.
	Scenario 1	High-cost exporters	High-cost exporters	High-cost exporters	High-cost exporters	High-cost exporters	High-cost exporters		Scenario 1	High-cost exporters	High-cost exporters	High-cost exporters	High-cost exporters	High-cost exporters	High-cost exporters
	Scenario 2	0	0	0	0	0	0		Scenario 2	0	0	0	0	0	0
1	1 Belgium	2.65316	0	0.00069705	2.65386	-190343	-156926	1	1 Belgium	2.65316	0	0.000786221	2.65394	-192591	-157145
2	2 Denmark	0.0361471	5395.55	10377.9	15773.4	-46446.6	-92388.2	2	2 Denmark	0.0361468	6992.89	11078.2	18071.1	-43528.4	-91631.7
3	3 Germany	8751.34	3871.06	14085.5	26707.9	-2.10586e+06	-1.80752e+06	3	3 Germany	8751.12	5002.7	15196.4	28950.2	-2.1279e+06	-1.80907e+06
4	4 Greece	1318.74	140.498	1.78657	1461.03	-15819.3	-97566.7	4	4 Greece	1318.75	174.47	1.85877	1495.07	-19274.2	-97832.8
5	5 Spain	159.026	632.706	208.866	1000.6	-827021	-479395	5	5 Spain	159.022	750.05	219.066	1128.14	-844575	-480377
6	6 France	0.0112747	3673.38	52.6759	3726.07	-970750	-1.02013e+06	6	6 France	0.0112746	4375.56	56.0538	4431.62	-973666	-1.01798e+06
7	7 Ireland	0.00355418	0.0754403	1414.89	1414.96	-90132.6	-78463.9	7	7 Ireland	0.00355415	0.0925089	1526.53	1526.63	-88488.2	-78419.7
8	8 Italy	0.0433822	16510	1998.68	18508.7	-640828	-927864	8	8 Italy	0.0433819	19525.7	2228.05	21753.8	-648451	-928714
9	9 Luxembourg	0	0.188032	0	0.188032	-24152.8	-13324.8	9	9 Luxembourg	0	0.221162	0	0.221162	-25120.3	-13265.4
10	10 Netherlands	0.253223	1539.99	39957	41497.2	-582058	-511072	10	10 Netherlands	0.253221	1961.59	42811.3	44773.2	-575965	-511264
11	11 Austria	0	468.329	340.58	808.909	-71638.7	-122986	11	11 Austria	0	609.419	374.518	983.937	-73790.7	-123112
12	12 Portugal	0	0	0.000720506	0.000720506	-137702	-205380	12	12 Portugal	0	0	0.000720506	0.000720506	-139241	-205466
13	13 Finland	0	0	0	0	-115255	-148727	13	13 Finland	0	0	0	0	-116070	-148954
14	14 Sweden	0.00057496	1.7701	0.0013941	1.77206	-263430	-279958	14	14 Sweden	0.00057496	2.09807	0.00172684	2.10037	-264933	-280427
15	15 UK	537.897	49062.3	55546.2	105146	-764530	-1.12067e+06	15	15 UK	537.882	62233.2	59444.3	122215	-735101	-1.11947e+06
16	16 Czech Republic	3179.3	121.733	232.99	3534.02	-158819	-144048	16	16 Czech Republic	3179.21	148.429	249.218	3576.86	-160821	-144077
17	17 Estonia	0	4.88577	0	4.88577	-9832.26	-15409	17	17 Estonia	0	5.75844	0	5.75844	-10024.8	-15409.6
18	18 Cyprus	0	0.11591	5.22603	5.34194	1574.24	-8385.16	18	18 Cyprus	0	0.150758	5.51059	5.66135	1395.22	-8390.96
19	19 Latvia	0	0.00368498	26.5016	26.5053	-51701	-14043	19	19 Latvia	0	0.00368498	27.7924	27.796	-52046.3	-14051.9
20	20 Lithuania	0	166.273	10.4413	176.714	17747.7	-22982.3	20	20 Lithuania	0	208.216	10.9639	219.18	17618.9	-22997
21	21 Hungary	258.289	352.916	321.889	933.094	-108509	-119876	21	21 Hungary	258.282	454.937	358.04	1071.26	-108364	-119431
22	22 Malta	0	0	0	0	-5870.44	-5320.65	22	22 Malta	0	0	0	0	-6117.56	-5352.22
23	23 Poland	11113.8	767.825	10001.5	21883.1	-97782.5	-362845	23	23 Poland	11113.5	963.166	10654.9	22731.5	-98672.2	-362742
24	24 Slovenia	161.764	0.000919514	6.7396	168.505	-28368	-19461.9	24	24 Slovenia	161.76	0.00363449	7.40275	169.166	-28785.3	-19472.8
25	25 Slovakia	6.90914	43.5887	71.3076	121.805	-108552	-75147.8	25	25 Slovakia	6.90918	50.5965	74.8086	132.314	-109086	-75157.1
26	26 Bulgaria	1047.28	86.8603	167.999	1302.13	-86431.4	-90666.1	26	26 Bulgaria	1047.25	102.422	176.184	1325.85	-86897.5	-90774.7
27	27 Romania	827.239	2056.6	4802.09	7685.93	-99018.2	-163027	27	27 Romania	827.216	2632.61	5236.13	8695.97	-99138.9	-162778
28	28 Norway	98.379	43558.4	93228.5	136885	515395	162065	28	28 Norway	98.3762	57336	100591	158025	587239	190517
29	29 Switzerland	0	0.00549391	0	0.00549391	-193211	-230850	29	29 Switzerland	0	0.00549391	0	0.00549391	-194850	-230877
30	30 Iceland	0	0	0	0	-16090.2	-16849.4	30	30 Iceland	0	0	0	0	-16124.2	-16843.3
31	31 Croatia	0	351.151	317.513	668.663	-40076.3	-60093.3	31	31 Croatia	0	444.92	352.608	797.528	-40250.5	-60112.9
32	32 Turkey	2147.95	5031.63	862.953	8042.53	-484403	-808250	32	32 Turkey	2147.89	6064.52	918.808	9131.21	-490464	-809142
33	33 Macedonia	0	0	0	0	-7576.39	-19116.9	33	33 Macedonia	0	0	0	0	-7603.95	-19115.2
34	34 USA	74953.1	1.73886e+06	1.26882e+06	3.08263e+06	3.5568e+06	-5.17996e+06	34	34 USA	74951	2.07608e+06	1.35008e+06	3.50112e+06	4.77242e+06	-5.02172e+06
35	35 Japan	161.205	86.6106	236.473	484.289	-3.02282e+06	-2.75103e+06	35	35 Japan	161.201	114.15	265.341	540.692	-3.02077e+06	-2.74426e+06
36	36 Canada	6425.5	602834	174769	784029	1.11643e+06	-805460	36	36 Canada	6425.32	725124	189272	920821	1.40765e+06	-773515
37	37 Australia	62457.6	28229.1	121540	212227	-837933	-966750	37	37 Australia	62455.9	34328.7	130888	227673	-844135	-968619
38	38 New Zealand	349.867	985.34	1555.22	2890.42	-67625.9	-59740.7	38	38 New Zealand	349.857	1259.84	1706.31	3316.01	-68517.4	-59812.9
39	39 Russian Federation	44863.8	1.14379e+06	470033	1.65869e+06	-78048	-1.55338e+06	39	39 Russian Federation	44862.6	1.39848e+06	513310	1.95666e+06	170320	-1.49731e+06
40	40 Rest of Annex I	0	6306.98	206.077	6513.06	-57260.2	-66983.8	40	40 Rest of Annex I	0	7494.03	222.779	7716.81	-56946.4	-68135.1
41	41 China	344606	438382	262740	1.04573e+06	-1.36537e+07	-1.16608e+07	41	41 China	344597	531565	281817	1.15798e+06	-1.31643e+07	-1.15276e+07
42	42 India	56100.4	23598	45530.5	125229	-8.17138e+06	-6.53918e+06	42	42 India	56098.8	31097.1	48857.9	136054	-8.1683e+06	-6.53593e+06
43	43 Mexico	1436.29	63594	79448.1	144478	-1.20416e+06	-1.37639e+06	43	43 Mexico	1436.25	82754.4	84793.5	168984	-1.18158e+06	-1.37459e+06
44	44 Brazil	566.172	220380	50674.9	271621	-1.52244e+06	-2.32367e+06	44	44 Brazil	566.157	272641	54142.4	327350	-1.67743e+06	-2.20556e+06
45	45 Argentina	2.97199	19810.4	87562.6	107376	-887343	-683007	45	45 Argentina	2.97196	25957.7	93540.7	119501	-899640	-684586
46	46 Colombia	11469.6	26513.2	18754.6	56737.5	-270931	-408174	46	46 Colombia	11469.4	32689.7	20045.4	64204.4	-268737	-407887
47	47 Rest of Latin America	374.621	753446	134204	888025	-401538	-803425	47	47 Rest of Latin America	374.611	895521	143819	1.03971e+06	-289104	-789084
48	48 Korea	164.041	6.47328	49.2149	219.729	-1.92403e+06	-1.56448e+06	48	48 Korea	164.037	8.41228	56.197	228.646	-1.91781e+06	-1.56078e+06
49	49 Taiwan	0.0072236	0.00641343	0.00462279	0.0182598	-812305	-488284	49	49 Taiwan	0.00722354	0.00673627	0.00462862	0.0185884	-815871	-488798
50	50 Indonesia	43084.6	26566.1	41275.7	110926	-1.47134e+06	-1.39571e+06	50	50 Indonesia	43083.3	34000.2	45830.9	122914	-1.44482e+06	-1.39303e+06
51	51 Rest of ASEAN	582.15	37954.3	23146.7	61683.2	-2.3239e+06	-1.10255e+06	51	51 Rest of ASEAN	582.128	46545.9	25414	72542.1	-2.28999e+06	-1.08919e+06
52	52 OPEC excl Venezuela	192.995	491401	128152	619746	-1.69674e+06	-1.19742e+06	52	52 OPEC excl Venezuela	192.989	112275	23431.9	135899	-2.91904e+06	-1.27861e+06
53	53 Rest of world	11927.3	120321	114590	246838	-1.0126e+06	-792922	53	53 Rest of world	11927	155464	128140	295531	-928779	-793712
54	54 Ukraine	4325.33	5467.81	30153.3	39946.4	-168555	20739.8	54	54 Ukraine	4325.21	6552.99	32441	43319.2	-169770	20789.4
55	55 Saudi Arabia	0	422395	39291.7	461687	-199229	-385335	55	55 Saudi Arabia	0	133085	-4483.48	128601	-1.23768e+06	-417352
56	56 Nigeria	6.13522	62378.4	8976.85	71361.4	236413	-11114.2	56	56 Nigeria	6.13506	80208.3	10094.4	90308.9	260623	-8911.36
57	57 South Africa	28736.4	356.876	2577.36	31670.6	205518	-182677	57	57 South Africa	28735.7	448.815	2747.62	31932.1	206542	-182665
58	58 Rest of Africa	1109.35	116980	9990.26	128080	-975308	-476121	58	58 Rest of Africa	1109.32	140398	11016.9	152524	-999483	-476989
59	59 Africa OPEC	0.0187165	125735	205089	330824	-90277.5	-69139.9	59	59 Africa OPEC	0.0187164	25852.7	182736	208588	-89864.8	-68949.4
60	60 Malaysia	294.877	12856.2	21629.9	34781	-163118	-78506	60	60 Malaysia	294.869	16892.1	24034.2	41221.1	-158597	-78646.2
61	61 Kazakhstan	9678.13	203674	19064.3	232417	-447716	-56340.5	61	61 Kazakhstan	9677.87	246727	20949.4	277354	-402353	-56696.5
62	Total 2020$tn	733480	6.82674e+06	3.5941e+06	1.11543e+07	-4.41526e+07	-5.20345e+07	62	Total 2020$tn	733460	7.28361e+06	3.66677e+06	1.16838e+07	-4.39677e+07	-5.15815e+07
63	Total EU 2020$tn	27463	128455	232859	388777	-7.27543e+06	-8.18922e+06	63	Total EU 2020$tn	27462.3	163530	250328	441321	-7.23337e+06	-8.16096e+06
64	Total OPEC 2020$tn	199.148	679514	342218	1.02193e+06	-1.55061e+06	-1.27768e+06	64	Total OPEC 2020$tn	199.143	218336	216262	434797	-2.74828e+06	-1.35647e+06
65	Total LatAm 2020$tn	13283.5	863363	319969	1.19662e+06	-2.76397e+06	-3.271e+06	65	Total LatAm 2020$tn	13283.2	1.03692e+06	342199	1.3924e+06	-2.63906e+06	-3.25615e+06
66	Total ROW 2020$tn	100252	531476	264238	895966	-9.21824e+06	-6.24357e+06	66	Total ROW 2020$tn	100249	655791	292559	1.0486e+06	-9.04639e+06	-6.22767e+06

## Sheet: Emissions
0	Dan_baIEA_covid_S3
FCO2	user emissions of carbon dioxide th tonnes carbon
	2005	2006	2007	2008	2009	2010	2011	2012	2013	2014	2015	2016	2017	2018	2019	2020	2021	2022	2023	2024	2025	2026	2027	2028	2029	2030	2031	2032	2033	2034	2035	2036	2037	2038	2039	2040	2041	2042	2043	2044	2045	2046	2047	2048	2049	2050	2051	2052	2053
?	7.72649e+06	7.93931e+06	8.23681e+06	8.35233e+06	8.20358e+06	8.53973e+06	7.98172e+06	8.12905e+06	8.22703e+06	8.45309e+06	8.69851e+06	9.22152e+06	9.39975e+06	9.54185e+06	9.69275e+06	9.42785e+06	9.5211e+06	9.62063e+06	9.97747e+06	1.01742e+07	1.04195e+07	1.06224e+07	1.08524e+07	1.1074e+07	1.13155e+07	1.15499e+07	1.1732e+07	1.1919e+07	1.21195e+07	1.2329e+07	1.25463e+07	1.27447e+07	1.29503e+07	1.31649e+07	1.33884e+07	1.3618e+07	1.386e+07	1.41086e+07	1.43636e+07	1.46239e+07	1.48913e+07	1.51648e+07	1.54465e+07	1.57379e+07	1.60363e+07	1.63387e+07	1.64488e+07	1.65304e+07	1.66092e+07
?
0	Dan_ba_covid_S3
FCO2	user emissions of carbon dioxide th tonnes carbon
	2005	2006	2007	2008	2009	2010	2011	2012	2013	2014	2015	2016	2017	2018	2019	2020	2021	2022	2023	2024	2025	2026	2027	2028	2029	2030	2031	2032	2033	2034	2035	2036	2037	2038	2039	2040	2041	2042	2043	2044	2045	2046	2047	2048	2049	2050	2051	2052	2053
?	7.72649e+06	7.93931e+06	8.23681e+06	8.35233e+06	8.20358e+06	8.53973e+06	8.77447e+06	8.92487e+06	9.28214e+06	9.35965e+06	9.34257e+06	9.44927e+06	9.65444e+06	9.42812e+06	9.48713e+06	9.24549e+06	9.30702e+06	9.24862e+06	9.36252e+06	9.24808e+06	9.13213e+06	8.93699e+06	8.74571e+06	8.54273e+06	8.38382e+06	8.25372e+06	8.15537e+06	8.08142e+06	8.02649e+06	7.99052e+06	7.97104e+06	7.94566e+06	7.93702e+06	7.90528e+06	7.91384e+06	7.91342e+06	7.92038e+06	7.93953e+06	7.96452e+06	8.02961e+06	8.02342e+06	8.05754e+06	8.08734e+06	8.14451e+06	8.18741e+06	8.23601e+06	8.27594e+06	8.27404e+06	8.26184e+06
?
0	Dan_2C_covid_S3
FCO2	user emissions of carbon dioxide th tonnes carbon
	2005	2006	2007	2008	2009	2010	2011	2012	2013	2014	2015	2016	2017	2018	2019	2020	2021	2022	2023	2024	2025	2026	2027	2028	2029	2030	2031	2032	2033	2034	2035	2036	2037	2038	2039	2040	2041	2042	2043	2044	2045	2046	2047	2048	2049	2050	2051	2052	2053
?	7.72649e+06	7.93931e+06	8.23681e+06	8.35233e+06	8.20358e+06	8.53973e+06	8.77447e+06	8.92487e+06	9.28214e+06	9.35965e+06	9.34256e+06	9.40256e+06	9.58663e+06	9.33803e+06	9.37494e+06	8.94254e+06	8.75125e+06	8.39808e+06	8.18618e+06	7.80627e+06	7.46471e+06	7.17026e+06	6.93713e+06	6.71931e+06	6.52783e+06	6.33591e+06	6.17758e+06	6.1477e+06	6.012e+06	5.89789e+06	5.79695e+06	5.7164e+06	5.64158e+06	5.54171e+06	5.46763e+06	5.23524e+06	5.194e+06	5.13997e+06	5.09592e+06	5.06824e+06	5.00996e+06	5.00039e+06	4.97105e+06	4.94614e+06	4.91653e+06	4.6732e+06	4.62487e+06	4.57587e+06	4.52809e+06
?
0	Dan_1-5C_covid_S3
FCO2	user emissions of carbon dioxide th tonnes carbon
	2005	2006	2007	2008	2009	2010	2011	2012	2013	2014	2015	2016	2017	2018	2019	2020	2021	2022	2023	2024	2025	2026	2027	2028	2029	2030	2031	2032	2033	2034	2035	2036	2037	2038	2039	2040	2041	2042	2043	2044	2045	2046	2047	2048	2049	2050	2051	2052	2053
?	7.72649e+06	7.93931e+06	8.23681e+06	8.35233e+06	8.20358e+06	8.53973e+06	8.77447e+06	8.92487e+06	9.28214e+06	9.35965e+06	9.34255e+06	9.36837e+06	9.55134e+06	9.30136e+06	9.33803e+06	8.71509e+06	8.17749e+06	7.57474e+06	7.06315e+06	6.46663e+06	5.89074e+06	5.37914e+06	4.94314e+06	4.55593e+06	4.21e+06	3.85575e+06	3.5377e+06	3.259e+06	3.00603e+06	2.78522e+06	2.50874e+06	2.25665e+06	2.01051e+06	1.77653e+06	1.56199e+06	1.18114e+06	1.0423e+06	902501	769967	645642	530447	437108	326663	224620	123266	-104312	-185492	-240187	-280750
?
0	Dan_baIEA_QU_covid_S3
FCO2	user emissions of carbon dioxide th tonnes carbon
	2005	2006	2007	2008	2009	2010	2011	2012	2013	2014	2015	2016	2017	2018	2019	2020	2021	2022	2023	2024	2025	2026	2027	2028	2029	2030	2031	2032	2033	2034	2035	2036	2037	2038	2039	2040	2041	2042	2043	2044	2045	2046	2047	2048	2049	2050	2051	2052	2053
?	7.72649e+06	7.93931e+06	8.23681e+06	8.35233e+06	8.20358e+06	8.53973e+06	7.98172e+06	8.12905e+06	8.22703e+06	8.45309e+06	8.69851e+06	9.22152e+06	9.39975e+06	9.54185e+06	9.69275e+06	9.42785e+06	9.52076e+06	9.61981e+06	9.97582e+06	1.01716e+07	1.04159e+07	1.0618e+07	1.08468e+07	1.10674e+07	1.13065e+07	1.15411e+07	1.17225e+07	1.19093e+07	1.21093e+07	1.2318e+07	1.25345e+07	1.2732e+07	1.29369e+07	1.31508e+07	1.3374e+07	1.36032e+07	1.38451e+07	1.40938e+07	1.43489e+07	1.46096e+07	1.48773e+07	1.51511e+07	1.54331e+07	1.57247e+07	1.60232e+07	1.63293e+07	1.64353e+07	1.65157e+07	1.65999e+07
?
0	Dan_ba_QU_covid_S3
FCO2	user emissions of carbon dioxide th tonnes carbon
	2005	2006	2007	2008	2009	2010	2011	2012	2013	2014	2015	2016	2017	2018	2019	2020	2021	2022	2023	2024	2025	2026	2027	2028	2029	2030	2031	2032	2033	2034	2035	2036	2037	2038	2039	2040	2041	2042	2043	2044	2045	2046	2047	2048	2049	2050	2051	2052	2053
?	7.72649e+06	7.93931e+06	8.23681e+06	8.35233e+06	8.20358e+06	8.53973e+06	8.77447e+06	8.92487e+06	9.28214e+06	9.35965e+06	9.34257e+06	9.44927e+06	9.65444e+06	9.42812e+06	9.48713e+06	9.24549e+06	9.30705e+06	9.24849e+06	9.36225e+06	9.24743e+06	9.13109e+06	8.93538e+06	8.74372e+06	8.54037e+06	8.38113e+06	8.25069e+06	8.15202e+06	8.07773e+06	8.02229e+06	7.98639e+06	7.95774e+06	7.94418e+06	7.93234e+06	7.90815e+06	7.9193e+06	7.9178e+06	7.9238e+06	7.94187e+06	7.96554e+06	8.02928e+06	8.02185e+06	8.05524e+06	8.08418e+06	8.14066e+06	8.183e+06	8.23107e+06	8.27072e+06	8.26855e+06	8.25608e+06
?
0	Dan_2C_QU_covid_S3
FCO2	user emissions of carbon dioxide th tonnes carbon
	2005	2006	2007	2008	2009	2010	2011	2012	2013	2014	2015	2016	2017	2018	2019	2020	2021	2022	2023	2024	2025	2026	2027	2028	2029	2030	2031	2032	2033	2034	2035	2036	2037	2038	2039	2040	2041	2042	2043	2044	2045	2046	2047	2048	2049	2050	2051	2052	2053
?	7.72649e+06	7.93931e+06	8.23681e+06	8.35233e+06	8.20358e+06	8.53973e+06	8.77447e+06	8.92487e+06	9.28214e+06	9.35965e+06	9.34256e+06	9.40256e+06	9.58663e+06	9.33803e+06	9.37494e+06	8.9422e+06	8.7508e+06	8.39718e+06	8.18479e+06	7.80435e+06	7.46233e+06	7.16764e+06	6.93413e+06	6.71597e+06	6.52426e+06	6.33193e+06	6.1735e+06	6.14325e+06	6.0071e+06	5.89277e+06	5.79159e+06	5.71092e+06	5.63598e+06	5.53596e+06	5.46169e+06	5.22914e+06	5.18772e+06	5.13347e+06	5.08924e+06	5.06147e+06	5.00303e+06	4.99342e+06	4.96378e+06	4.93871e+06	4.90879e+06	4.66556e+06	4.6172e+06	4.56822e+06	4.52031e+06
?
0	Dan_1-5C_QU_covid_S3
FCO2	user emissions of carbon dioxide th tonnes carbon
	2005	2006	2007	2008	2009	2010	2011	2012	2013	2014	2015	2016	2017	2018	2019	2020	2021	2022	2023	2024	2025	2026	2027	2028	2029	2030	2031	2032	2033	2034	2035	2036	2037	2038	2039	2040	2041	2042	2043	2044	2045	2046	2047	2048	2049	2050	2051	2052	2053
?	7.72649e+06	7.93931e+06	8.23681e+06	8.35233e+06	8.20358e+06	8.53973e+06	8.77447e+06	8.92487e+06	9.28214e+06	9.35965e+06	9.34298e+06	9.36903e+06	9.55243e+06	9.30274e+06	9.33981e+06	8.71677e+06	8.17841e+06	7.58343e+06	7.07838e+06	6.48793e+06	5.91668e+06	5.40859e+06	4.97557e+06	4.58745e+06	4.2442e+06	3.88941e+06	3.572e+06	3.2924e+06	3.03748e+06	2.81406e+06	2.53384e+06	2.2815e+06	2.03048e+06	1.79199e+06	1.57649e+06	1.1916e+06	1.05172e+06	909558	774746	648824	531251	437582	326567	223838	121980	-107255	-187806	-242739	-282841
?
0	Dan_baIEA_SO_covid_S3
FCO2	user emissions of carbon dioxide th tonnes carbon
	2005	2006	2007	2008	2009	2010	2011	2012	2013	2014	2015	2016	2017	2018	2019	2020	2021	2022	2023	2024	2025	2026	2027	2028	2029	2030	2031	2032	2033	2034	2035	2036	2037	2038	2039	2040	2041	2042	2043	2044	2045	2046	2047	2048	2049	2050	2051	2052	2053
?	7.72649e+06	7.93931e+06	8.23681e+06	8.35233e+06	8.20358e+06	8.53973e+06	7.98172e+06	8.12905e+06	8.22703e+06	8.45309e+06	8.69851e+06	9.22152e+06	9.39975e+06	9.54185e+06	9.69275e+06	9.42785e+06	9.52132e+06	9.62117e+06	9.97851e+06	1.01757e+07	1.04215e+07	1.06251e+07	1.08557e+07	1.10782e+07	1.13203e+07	1.15565e+07	1.17396e+07	1.19262e+07	1.21269e+07	1.23369e+07	1.25546e+07	1.27536e+07	1.29597e+07	1.31747e+07	1.33986e+07	1.36284e+07	1.38709e+07	1.41197e+07	1.43748e+07	1.46354e+07	1.49029e+07	1.51766e+07	1.54585e+07	1.575e+07	1.60485e+07	1.63511e+07	1.64578e+07	1.65411e+07	1.66216e+07
?
0	Dan_ba_SO_covid_S3
FCO2	user emissions of carbon dioxide th tonnes carbon
	2005	2006	2007	2008	2009	2010	2011	2012	2013	2014	2015	2016	2017	2018	2019	2020	2021	2022	2023	2024	2025	2026	2027	2028	2029	2030	2031	2032	2033	2034	2035	2036	2037	2038	2039	2040	2041	2042	2043	2044	2045	2046	2047	2048	2049	2050	2051	2052	2053
?	7.72649e+06	7.93931e+06	8.23681e+06	8.35233e+06	8.20358e+06	8.53973e+06	8.77447e+06	8.92487e+06	9.28214e+06	9.35965e+06	9.34257e+06	9.44927e+06	9.65444e+06	9.42812e+06	9.48713e+06	9.24549e+06	9.30701e+06	9.24866e+06	9.36259e+06	9.24832e+06	9.13249e+06	8.93744e+06	8.74631e+06	8.54339e+06	8.38448e+06	8.2544e+06	8.15611e+06	8.08222e+06	8.02745e+06	7.99159e+06	7.97239e+06	7.94834e+06	7.93689e+06	7.90052e+06	7.91335e+06	7.91337e+06	7.92505e+06	7.94569e+06	7.97049e+06	8.03544e+06	8.02885e+06	8.06283e+06	8.09201e+06	8.14859e+06	8.19116e+06	8.2396e+06	8.27942e+06	8.27748e+06	8.2652e+06
?
0	Dan_2C_SO_covid_S3
FCO2	user emissions of carbon dioxide th tonnes carbon
	2005	2006	2007	2008	2009	2010	2011	2012	2013	2014	2015	2016	2017	2018	2019	2020	2021	2022	2023	2024	2025	2026	2027	2028	2029	2030	2031	2032	2033	2034	2035	2036	2037	2038	2039	2040	2041	2042	2043	2044	2045	2046	2047	2048	2049	2050	2051	2052	2053
?	7.72649e+06	7.93931e+06	8.23681e+06	8.35233e+06	8.20358e+06	8.53973e+06	8.77447e+06	8.92487e+06	9.28214e+06	9.35965e+06	9.34256e+06	9.40256e+06	9.58663e+06	9.33803e+06	9.37494e+06	8.9422e+06	8.75084e+06	8.39782e+06	8.18625e+06	7.80652e+06	7.46518e+06	7.17115e+06	6.93847e+06	6.72116e+06	6.53266e+06	6.33896e+06	6.18112e+06	6.15165e+06	6.01642e+06	5.90284e+06	5.80215e+06	5.72202e+06	5.64761e+06	5.54819e+06	5.47429e+06	5.24193e+06	5.20047e+06	5.14625e+06	5.10193e+06	5.07419e+06	5.01552e+06	5.00568e+06	4.97594e+06	4.95056e+06	4.92067e+06	4.6767e+06	4.62822e+06	4.57911e+06	4.53107e+06
?
0	Dan_1-5C_SO_covid_S3
FCO2	user emissions of carbon dioxide th tonnes carbon
	2005	2006	2007	2008	2009	2010	2011	2012	2013	2014	2015	2016	2017	2018	2019	2020	2021	2022	2023	2024	2025	2026	2027	2028	2029	2030	2031	2032	2033	2034	2035	2036	2037	2038	2039	2040	2041	2042	2043	2044	2045	2046	2047	2048	2049	2050	2051	2052	2053
?	7.72649e+06	7.93931e+06	8.23681e+06	8.35233e+06	8.20358e+06	8.53973e+06	8.77447e+06	8.92487e+06	9.28214e+06	9.35965e+06	9.34255e+06	9.36837e+06	9.55134e+06	9.30136e+06	9.33803e+06	8.71509e+06	8.1767e+06	7.57442e+06	7.06292e+06	6.46529e+06	5.89079e+06	5.38035e+06	4.94486e+06	4.55722e+06	4.21271e+06	3.8589e+06	3.54156e+06	3.26329e+06	3.01087e+06	2.79052e+06	2.51481e+06	2.26334e+06	2.01691e+06	1.78345e+06	1.56979e+06	1.18835e+06	1.04929e+06	908880	775778	652104	535439	442299	331746	229239	127608	-100672	-181720	-236189	-276534
?
?
[truncated: 17 more columns]

## Sheet: Prices $perGJ
0	Dan_baIEA_covid_S3
MERC	FTT Resource prices or costs (2013$/GJ or 2013$/MWh)
	2005	2006	2007	2008	2009	2010	2011	2012	2013	2014	2015	2016	2017	2018	2019	2020	2021	2022	2023	2024	2025	2026	2027	2028	2029	2030	2031	2032	2033	2034	2035	2036	2037	2038	2039	2040	2041	2042	2043	2044	2045	2046	2047	2048	2049	2050	2051	2052	2053
Oil	0	0	0	0	0	0	0	0	5.689	5.689	5.689	5.689	5.1817	5.2295	5.2947	5.2766	5.3075	5.3581	5.4446	5.515	5.5831	5.644	5.7037	5.7596	5.8158	5.8691	5.9079	5.9465	5.9859	6.0257	6.0661	6.1072	6.1489	6.1903	6.233	6.2765	6.3207	6.3652	6.4098	6.4543	6.4992	6.5437	6.5886	6.634	6.6798	6.7246	6.7598	6.7914	6.8224
Coal	0	0	0	0	0	0	0	0	0.4246	0.4246	0.4246	0.4246	0.4226	0.4237	0.4248	0.4243	0.4249	0.4253	0.427	0.4282	0.4294	0.4307	0.4321	0.4334	0.4349	0.4363	0.4379	0.4395	0.4411	0.4428	0.4446	0.4461	0.4478	0.4496	0.4514	0.4533	0.4552	0.4572	0.4592	0.4612	0.4633	0.4654	0.4675	0.4696	0.4718	0.4739	0.4754	0.4766	0.4777
Gas	0	0	0	0	0	0	0	0	3.374	3.374	3.374	3.374	2.9236	2.9563	2.9963	2.9948	3.0314	3.0618	3.1276	3.1678	3.2189	3.2608	3.3063	3.3502	3.3953	3.4362	3.4744	3.5103	3.5466	3.5836	3.6207	3.656	3.6916	3.7278	3.7644	3.8013	3.8394	3.8783	3.9179	3.9584	3.9999	4.0415	4.0843	4.1286	4.1777	4.2224	4.2464	4.2688	4.2905
0	Dan_baIEA_QU_covid_S3
MERC	FTT Resource prices or costs (2013$/GJ or 2013$/MWh)
	2005	2006	2007	2008	2009	2010	2011	2012	2013	2014	2015	2016	2017	2018	2019	2020	2021	2022	2023	2024	2025	2026	2027	2028	2029	2030	2031	2032	2033	2034	2035	2036	2037	2038	2039	2040	2041	2042	2043	2044	2045	2046	2047	2048	2049	2050	2051	2052	2053
Oil	0	0	0	0	0	0	0	0	5.689	5.689	5.689	5.689	5.1817	5.2295	5.2947	5.2766	5.3192	5.3796	5.4865	5.5719	5.6566	5.7237	5.7917	5.8549	5.9175	5.9764	6.0186	6.0604	6.1028	6.1455	6.1885	6.2321	6.2761	6.3198	6.3645	6.4102	6.4564	6.5028	6.5492	6.5956	6.6421	6.6883	6.7349	6.7819	6.8294	6.8759	6.9121	6.9446	6.9764
Coal	0	0	0	0	0	0	0	0	0.4246	0.4246	0.4246	0.4246	0.4226	0.4237	0.4248	0.4243	0.4249	0.4253	0.427	0.4282	0.4294	0.4307	0.432	0.4334	0.4348	0.4363	0.4379	0.4394	0.4411	0.4428	0.4445	0.4461	0.4478	0.4496	0.4514	0.4532	0.4552	0.4572	0.4592	0.4612	0.4633	0.4653	0.4674	0.4696	0.4717	0.4739	0.4754	0.4765	0.4777
Gas	0	0	0	0	0	0	0	0	3.374	3.374	3.374	3.374	2.9236	2.9563	2.9963	2.9948	3.0379	3.0762	3.1484	3.1933	3.2494	3.2948	3.3435	3.3901	3.4373	3.4803	3.5201	3.5574	3.595	3.633	3.6712	3.7073	3.7437	3.7809	3.8183	3.8561	3.8951	3.935	3.9756	4.0171	4.0597	4.1025	4.1466	4.1921	4.2428	4.2924	4.3145	4.3368	4.3591
0	Dan_baIEA_SO_covid_S3
MERC	FTT Resource prices or costs (2013$/GJ or 2013$/MWh)
	2005	2006	2007	2008	2009	2010	2011	2012	2013	2014	2015	2016	2017	2018	2019	2020	2021	2022	2023	2024	2025	2026	2027	2028	2029	2030	2031	2032	2033	2034	2035	2036	2037	2038	2039	2040	2041	2042	2043	2044	2045	2046	2047	2048	2049	2050	2051	2052	2053
Oil	0	0	0	0	0	0	0	0	5.689	5.689	5.689	5.689	5.1817	5.2295	5.2947	5.2766	5.2995	5.3401	5.4191	5.4789	5.5445	5.6001	5.6544	5.7052	5.7567	5.8056	5.8401	5.8742	5.9094	5.9454	5.9824	6.0203	6.0592	6.098	6.1383	6.1798	6.2221	6.2648	6.3078	6.3509	6.3944	6.4377	6.4815	6.5258	6.5706	6.6145	6.6488	6.6796	6.7097
Coal	0	0	0	0	0	0	0	0	0.4246	0.4246	0.4246	0.4246	0.4226	0.4237	0.4248	0.4243	0.4249	0.4253	0.427	0.4282	0.4294	0.4307	0.4321	0.4334	0.4349	0.4363	0.4379	0.4395	0.4411	0.4428	0.4446	0.4462	0.4479	0.4496	0.4514	0.4533	0.4552	0.4572	0.4592	0.4613	0.4633	0.4654	0.4675	0.4696	0.4718	0.474	0.4754	0.4766	0.4777
Gas	0	0	0	0	0	0	0	0	3.374	3.374	3.374	3.374	2.9236	2.9563	2.9963	2.9948	3.0287	3.0571	3.1154	3.1498	3.1984	3.2346	3.2787	3.317	3.3608	3.3995	3.4354	3.4691	3.5033	3.5381	3.5731	3.6065	3.6401	3.6743	3.7087	3.7433	3.7789	3.8152	3.8519	3.8894	3.9278	3.9661	4.0054	4.0459	4.0872	4.1304	4.1539	4.1762	4.198
0	Dan_ba_covid_S3
MERC	FTT Resource prices or costs (2013$/GJ or 2013$/MWh)
	2005	2006	2007	2008	2009	2010	2011	2012	2013	2014	2015	2016	2017	2018	2019	2020	2021	2022	2023	2024	2025	2026	2027	2028	2029	2030	2031	2032	2033	2034	2035	2036	2037	2038	2039	2040	2041	2042	2043	2044	2045	2046	2047	2048	2049	2050	2051	2052	2053
Oil	0	0	0	0	0	0	0	0	5.689	5.689	5.689	5.689	5.2221	5.2971	5.3389	5.3425	5.3992	5.4227	5.4569	5.4834	5.5121	5.5387	5.5671	5.5917	5.6163	5.6408	5.666	5.6842	5.7088	5.7267	5.7525	5.7689	5.7866	5.8061	5.8267	5.8454	5.864	5.8823	5.9007	5.9184	5.9353	5.9514	5.9657	5.9796	5.9931	6.0072	6.0209	6.0343	6.0465
Coal	0	0	0	0	0	0	0	0	0.4246	0.4246	0.4246	0.4246	0.4228	0.4182	0.4187	0.4179	0.4182	0.4183	0.4191	0.4183	0.4175	0.4156	0.4132	0.4108	0.4087	0.407	0.4057	0.4049	0.4042	0.4044	0.4041	0.404	0.4043	0.4038	0.404	0.4041	0.4042	0.4043	0.4046	0.4052	0.4052	0.4056	0.406	0.4068	0.4074	0.408	0.4085	0.4086	0.4086
Gas	0	0	0	0	0	0	0	0	3.374	3.374	3.374	3.374	2.9079	2.9784	3.0224	3.0234	3.058	3.0797	3.1208	3.1288	3.1442	3.1464	3.1493	3.1518	3.1555	3.1629	3.1664	3.17	3.1765	3.179	3.1868	3.1951	3.2033	3.2167	3.23	3.2434	3.2594	3.2776	3.2971	3.3178	3.3386	3.3601	3.3816	3.4034	3.4254	3.4479	3.4591	3.4704	3.481
0	Dan_ba_QU_covid_S3
MERC	FTT Resource prices or costs (2013$/GJ or 2013$/MWh)
	2005	2006	2007	2008	2009	2010	2011	2012	2013	2014	2015	2016	2017	2018	2019	2020	2021	2022	2023	2024	2025	2026	2027	2028	2029	2030	2031	2032	2033	2034	2035	2036	2037	2038	2039	2040	2041	2042	2043	2044	2045	2046	2047	2048	2049	2050	2051	2052	2053
Oil	0	0	0	0	0	0	0	0	5.689	5.689	5.689	5.689	5.2221	5.2971	5.3389	5.3425	5.4095	5.4256	5.4688	5.4926	5.5225	5.5504	5.5807	5.606	5.6324	5.658	5.6856	5.7046	5.7307	5.7496	5.7779	5.7901	5.8174	5.8349	5.8609	5.8788	5.8984	5.9182	5.9378	5.9565	5.9743	5.9914	6.0065	6.0214	6.036	6.0511	6.066	6.0806	6.0939
Coal	0	0	0	0	0	0	0	0	0.4246	0.4246	0.4246	0.4246	0.4228	0.4182	0.4187	0.4179	0.4182	0.4183	0.4191	0.4184	0.4175	0.4156	0.4133	0.4108	0.4088	0.407	0.4058	0.405	0.4042	0.4044	0.4039	0.4051	0.4043	0.4044	0.4045	0.4043	0.4043	0.4044	0.4046	0.4053	0.4053	0.4057	0.4061	0.4069	0.4074	0.4081	0.4085	0.4086	0.4087
Gas	0	0	0	0	0	0	0	0	3.374	3.374	3.374	3.374	2.9079	2.9784	3.0224	3.0234	3.0629	3.0886	3.136	3.1458	3.1643	3.1674	3.1711	3.1742	3.181	3.1875	3.191	3.1948	3.2017	3.2043	3.2126	3.2146	3.2309	3.241	3.2574	3.2743	3.2933	3.3132	3.3338	3.3551	3.3763	3.3982	3.42	3.4421	3.4645	3.4873	3.4985	3.5099	3.5205
0	Dan_ba_SO_covid_S3
MERC	FTT Resource prices or costs (2013$/GJ or 2013$/MWh)
	2005	2006	2007	2008	2009	2010	2011	2012	2013	2014	2015	2016	2017	2018	2019	2020	2021	2022	2023	2024	2025	2026	2027	2028	2029	2030	2031	2032	2033	2034	2035	2036	2037	2038	2039	2040	2041	2042	2043	2044	2045	2046	2047	2048	2049	2050	2051	2052	2053
Oil	0	0	0	0	0	0	0	0	5.689	5.689	5.689	5.689	5.2221	5.2971	5.3389	5.3425	5.399	5.4218	5.4553	5.4806	5.5085	5.5339	5.561	5.5841	5.6072	5.626	5.6528	5.6699	5.6888	5.7078	5.7326	5.7473	5.7645	5.7822	5.7985	5.8163	5.8329	5.8499	5.8671	5.8833	5.8987	5.913	5.9255	5.9372	5.9486	5.9605	5.9722	5.9796	5.9926
Coal	0	0	0	0	0	0	0	0	0.4246	0.4246	0.4246	0.4246	0.4228	0.4182	0.4187	0.4179	0.4182	0.4183	0.4191	0.4183	0.4175	0.4156	0.4132	0.4108	0.4087	0.407	0.4057	0.4049	0.4042	0.4044	0.4041	0.4041	0.404	0.4035	0.4044	0.404	0.4044	0.4046	0.4047	0.4053	0.4053	0.4056	0.406	0.4068	0.4074	0.408	0.4085	0.4086	0.4086
Gas	0	0	0	0	0	0	0	0	3.374	3.374	3.374	3.374	2.9079	2.9784	3.0224	3.0234	3.0535	3.0762	3.1141	3.1229	3.1389	3.142	3.1486	3.1514	3.1553	3.1621	3.1651	3.168	3.1713	3.1739	3.1817	3.189	3.1991	3.2134	3.2216	3.2376	3.2539	3.2738	3.2959	3.3188	3.34	3.3599	3.3801	3.4006	3.4211	3.4421	3.453	3.4641	3.4745
0	Dan_2C_covid_S3
MERC	FTT Resource prices or costs (2013$/GJ or 2013$/MWh)
	2005	2006	2007	2008	2009	2010	2011	2012	2013	2014	2015	2016	2017	2018	2019	2020	2021	2022	2023	2024	2025	2026	2027	2028	2029	2030	2031	2032	2033	2034	2035	2036	2037	2038	2039	2040	2041	2042	2043	2044	2045	2046	2047	2048	2049	2050	2051	2052	2053
Oil	0	0	0	0	0	0	0	0	5.689	5.689	5.689	5.689	5.1945	5.2691	5.3103	5.3219	5.3617	5.3598	5.3616	5.3597	5.3501	5.3317	5.3268	5.3243	5.3262	5.3312	5.3454	5.3618	5.3768	5.3931	5.4105	5.427	5.444	5.4612	5.4797	5.4986	5.5177	5.5367	5.556	5.5744	5.5927	5.6099	5.6252	5.6395	5.6533	5.6588	5.6745	5.689	5.7034
Coal	0	0	0	0	0	0	0	0	0.4246	0.4246	0.4246	0.4246	0.422	0.4174	0.4178	0.4135	0.4091	0.4048	0.4017	0.3986	0.3962	0.394	0.3922	0.3903	0.3883	0.3864	0.3848	0.3843	0.3838	0.3832	0.3826	0.3826	0.3824	0.3818	0.3812	0.3765	0.3765	0.3763	0.3763	0.3768	0.3763	0.3768	0.377	0.3773	0.3775	0.3778	0.3775	0.3773	0.3769
Gas	0	0	0	0	0	0	0	0	3.374	3.374	3.374	3.374	2.8863	2.9596	3.0015	3.0015	3.0471	3.0694	3.0988	3.0956	3.0905	3.0749	3.066	3.0603	3.0558	3.047	3.0416	3.0421	3.0336	3.028	3.0239	3.0228	3.0238	3.0262	3.0297	3.0363	3.0451	3.0554	3.0703	3.0806	3.0972	3.1136	3.1293	3.1451	3.1609	3.1481	3.1499	3.1573	3.1638
0	Dan_2C_QU_covid_S3
MERC	FTT Resource prices or costs (2013$/GJ or 2013$/MWh)
	2005	2006	2007	2008	2009	2010	2011	2012	2013	2014	2015	2016	2017	2018	2019	2020	2021	2022	2023	2024	2025	2026	2027	2028	2029	2030	2031	2032	2033	2034	2035	2036	2037	2038	2039	2040	2041	2042	2043	2044	2045	2046	2047	2048	2049	2050	2051	2052	2053
Oil	0	0	0	0	0	0	0	0	5.689	5.689	5.689	5.689	5.1945	5.2691	5.3103	5.3219	5.3715	5.3712	5.3741	5.374	5.3649	5.3478	5.3442	5.3433	5.3463	5.3527	5.3692	5.3937	5.4103	5.4344	5.4579	5.4748	5.4984	5.5163	5.5416	5.5611	5.5864	5.6055	5.6307	5.6488	5.6686	5.6877	5.7048	5.7205	5.7357	5.7415	5.7586	5.7742	5.7897
Coal	0	0	0	0	0	0	0	0	0.4246	0.4246	0.4246	0.4246	0.422	0.4174	0.4178	0.4135	0.4091	0.4048	0.4017	0.3987	0.3962	0.394	0.3922	0.3903	0.3884	0.3864	0.3848	0.3843	0.3838	0.3833	0.3827	0.3826	0.3824	0.3818	0.3812	0.3766	0.3765	0.3763	0.3763	0.3768	0.3763	0.3768	0.377	0.3773	0.3775	0.3778	0.3775	0.3774	0.3769
Gas	0	0	0	0	0	0	0	0	3.374	3.374	3.374	3.374	2.8863	2.9596	3.0015	3.0014	3.0569	3.0815	3.1152	3.113	3.1086	3.0928	3.084	3.0785	3.0744	3.0658	3.0607	3.0616	3.0559	3.0467	3.044	3.0438	3.0452	3.0481	3.0543	3.058	3.0682	3.0816	3.0955	3.1062	3.1237	3.141	3.1574	3.1739	3.1903	3.1766	3.1784	3.1859	3.1925
0	Dan_2C_SO_covid_S3
MERC	FTT Resource prices or costs (2013$/GJ or 2013$/MWh)
	2005	2006	2007	2008	2009	2010	2011	2012	2013	2014	2015	2016	2017	2018	2019	2020	2021	2022	2023	2024	2025	2026	2027	2028	2029	2030	2031	2032	2033	2034	2035	2036	2037	2038	2039	2040	2041	2042	2043	2044	2045	2046	2047	2048	2049	2050	2051	2052	2053
Oil	0	0	0	0	0	0	0	0	5.689	5.689	5.689	5.689	5.1945	5.2691	5.3103	5.3219	5.3496	5.3418	5.3356	5.318	5.2942	5.268	5.2515	5.2433	5.2386	5.2383	5.2414	5.252	5.2581	5.2719	5.286	5.2989	5.3126	5.3268	5.3428	5.3596	5.3769	5.3945	5.4127	5.4303	5.4479	5.4646	5.4796	5.4936	5.5073	5.5126	5.5281	5.543	5.558
Coal	0	0	0	0	0	0	0	0	0.4246	0.4246	0.4246	0.4246	0.422	0.4174	0.4178	0.4135	0.4091	0.4048	0.4017	0.3986	0.3962	0.394	0.3922	0.3903	0.3884	0.3864	0.3848	0.3843	0.3838	0.3832	0.3826	0.3826	0.3824	0.3818	0.3811	0.3765	0.3765	0.3763	0.3763	0.3768	0.3763	0.3768	0.377	0.3773	0.3775	0.3778	0.3775	0.3773	0.3768
Gas	0	0	0	0	0	0	0	0	3.374	3.374	3.374	3.374	2.8863	2.9596	3.0015	3.0014	3.0429	3.0642	3.092	3.0907	3.0883	3.0718	3.06	3.0494	3.0447	3.0332	3.0236	3.0244	3.0144	3.0044	3.0006	2.999	2.9997	3.002	3.0053	3.0122	3.0216	3.0355	3.0501	3.0633	3.0797	3.0975	3.1146	3.1318	3.1489	3.1344	3.1359	3.1433	3.15
0	Dan_1-5C_covid_S3
MERC	FTT Resource prices or costs (2013$/GJ or 2013$/MWh)
	2005	2006	2007	2008	2009	2010	2011	2012	2013	2014	2015	2016	2017	2018	2019	2020	2021	2022	2023	2024	2025	2026	2027	2028	2029	2030	2031	2032	2033	2034	2035	2036	2037	2038	2039	2040	2041	2042	2043	2044	2045	2046	2047	2048	2049	2050	2051	2052	2053
Oil	0	0	0	0	0	0	0	0	5.689	5.689	5.689	5.689	5.1847	5.2592	5.3004	5.2952	5.2672	5.2477	5.2253	5.2056	5.1509	5.0905	5.0352	4.9815	4.9312	4.8876	4.846	4.8011	4.7542	4.7078	4.6633	4.6202	4.584	4.5543	4.5194	4.5142	4.4945	4.4771	4.4627	4.4541	4.446	4.44	4.4345	4.4306	4.4268	4.4182	4.4308	4.4545	4.4803
Coal	0	0	0	0	0	0	0	0	0.4246	0.4246	0.4246	0.4246	0.4218	0.4171	0.4176	0.4123	0.4054	0.3989	0.3928	0.3873	0.3827	0.3785	0.3752	0.3723	0.3698	0.3678	0.3659	0.3645	0.3636	0.3628	0.3619	0.3611	0.3606	0.3599	0.3593	0.3522	0.3524	0.3525	0.3525	0.3523	0.3528	0.3531	0.3533	0.3534	0.3536	0.3538	0.3533	0.3537	0.3536
Gas	0	0	0	0	0	0	0	0	3.374	3.374	3.374	3.374	2.8788	2.9523	2.9942	2.9934	3.0331	3.0354	3.0425	3.0101	2.9754	2.9288	2.8894	2.8514	2.816	2.7551	2.7019	2.662	2.6289	2.6147	2.5955	2.584	2.57	2.5554	2.5394	2.515	2.5139	2.5136	2.5142	2.5161	2.5218	2.5335	2.5405	2.5523	2.5628	2.5125	2.5029	2.5052	2.5077
0	Dan_1-5C_QU_covid_S3
MERC	FTT Resource prices or costs (2013$/GJ or 2013$/MWh)
	2005	2006	2007	2008	2009	2010	2011	2012	2013	2014	2015	2016	2017	2018	2019	2020	2021	2022	2023	2024	2025	2026	2027	2028	2029	2030	2031	2032	2033	2034	2035	2036	2037	2038	2039	2040	2041	2042	2043	2044	2045	2046	2047	2048	2049	2050	2051	2052	2053
Oil	0	0	0	0	0	0	0	0	5.689	5.689	5.689	5.689	5.1853	5.2598	5.3012	5.2961	5.2757	5.2687	5.2537	5.2456	5.2089	5.1629	5.1273	5.0897	5.0529	5.0211	4.9908	4.9579	4.9233	4.8888	4.8534	4.8234	4.7943	4.7661	4.7404	4.7315	4.7121	4.6955	4.6806	4.6676	4.659	4.6504	4.6417	4.6344	4.6266	4.6114	4.6207	4.6303	4.6413
Coal	0	0	0	0	0	0	0	0	0.4246	0.4246	0.4246	0.4246	0.4218	0.4171	0.4176	0.4123	0.4054	0.3989	0.3928	0.3873	0.3827	0.3785	0.3752	0.3722	0.3699	0.3678	0.3659	0.3645	0.3636	0.3628	0.3618	0.3611	0.3606	0.3599	0.3593	0.3522	0.3524	0.3524	0.3525	0.3523	0.3527	0.3531	0.3532	0.3534	0.3535	0.3538	0.3532	0.3537	0.3536
Gas	0	0	0	0	0	0	0	0	3.374	3.374	3.374	3.374	2.8788	2.9523	2.9942	2.9935	3.0399	3.0434	3.0557	3.0211	2.9857	2.9375	2.8976	2.8603	2.8247	2.7636	2.7122	2.675	2.6437	2.6288	2.6122	2.5975	2.5855	2.571	2.556	2.5333	2.5332	2.5338	2.5353	2.5382	2.546	2.5589	2.5666	2.5789	2.5896	2.5413	2.5307	2.5331	2.5357
0	Dan_1-5C_SO_covid_S3
MERC	FTT Resource prices or costs (2013$/GJ or 2013$/MWh)
	2005	2006	2007	2008	2009	2010	2011	2012	2013	2014	2015	2016	2017	2018	2019	2020	2021	2022	2023	2024	2025	2026	2027	2028	2029	2030	2031	2032	2033	2034	2035	2036	2037	2038	2039	2040	2041	2042	2043	2044	2045	2046	2047	2048	2049	2050	2051	2052	2053
Oil	0	0	0	0	0	0	0	0	5.689	5.689	5.689	5.689	5.1847	5.2592	5.3004	5.2952	5.2507	5.2224	5.1875	5.155	5.0832	5.0062	4.9337	4.8628	4.7939	4.7333	4.6744	4.6117	4.5409	4.4745	4.4101	4.3465	4.2961	4.241	4.1965	4.1806	4.147	4.1176	4.0972	4.0772	4.061	4.0538	4.0457	4.0385	4.0317	4.0132	4.0295	4.0623	4.1036
Coal	0	0	0	0	0	0	0	0	0.4246	0.4246	0.4246	0.4246	0.4218	0.4171	0.4176	0.4123	0.4054	0.3989	0.3928	0.3873	0.3827	0.3785	0.3752	0.3722	0.3699	0.3678	0.3659	0.3645	0.3636	0.3628	0.3619	0.3612	0.3606	0.3599	0.3594	0.3523	0.3524	0.3525	0.3526	0.3524	0.3528	0.3532	0.3534	0.3535	0.3536	0.3539	0.3533	0.3538	0.3536
Gas	0	0	0	0	0	0	0	0	3.374	3.374	3.374	3.374	2.8788	2.9523	2.9942	2.9934	3.0297	3.0329	3.0411	3.002	2.9593	2.8994	2.8529	2.806	2.7578	2.6827	2.6141	2.5598	2.5172	2.503	2.4808	2.4688	2.4514	2.4382	2.4184	2.3937	2.3941	2.3962	2.4023	2.4132	2.4251	2.4449	2.4576	2.4759	2.4898	2.4334	2.4241	2.4298	2.4361
[truncated: 12 more columns]

## Sheet: Prices $perboe
0	Dan_baIEA
MERC	FTT Resource prices or costs (2013$/GJ or 2013$/MWh)
	2005	2006	2007	2008	2009	2010	2011	2012	2013	2014	2015	2016	2017	2018	2019	2020	2021	2022	2023	2024	2025	2026	2027	2028	2029	2030	2031	2032	2033	2034	2035	2036	2037	2038	2039	2040	2041	2042	2043	2044	2045	2046	2047	2048	2049	2050	2051	2052	2053
Oil	0	0	0	0	0	0	0	0	49.1503	49.1503	49.1503	49.1503	44.7675	45.1805	45.7438	45.5874	45.8544	46.2915	47.0388	47.6471	48.2354	48.7616	49.2773	49.7603	50.2458	50.7063	51.0415	51.375	51.7154	52.0593	52.4083	52.7634	53.1237	53.4813	53.8503	54.2261	54.6079	54.9924	55.3777	55.7622	56.1501	56.5346	56.9225	57.3147	57.7104	58.0975	58.4016	58.6746	58.9424
Coal	0	0	0	0	0	0	0	0	3.66835	3.66835	3.66835	3.66835	3.65107	3.66057	3.67008	3.66576	3.67094	3.6744	3.68908	3.69945	3.70982	3.72105	3.73315	3.74438	3.75734	3.76943	3.78325	3.79708	3.8109	3.82559	3.84114	3.8541	3.86879	3.88434	3.89989	3.9163	3.93272	3.95	3.96728	3.98456	4.0027	4.02084	4.03898	4.05713	4.07613	4.09428	4.10724	4.1176	4.12711
Gas	0	0	0	0	0	0	0	0	29.1498	29.1498	29.1498	29.1498	25.2586	25.5411	25.8867	25.8737	26.1899	26.4525	27.021	27.3683	27.8098	28.1718	28.5649	28.9442	29.3338	29.6872	30.0172	30.3274	30.641	30.9607	31.2812	31.5862	31.8937	32.2065	32.5227	32.8415	33.1706	33.5067	33.8489	34.1988	34.5573	34.9167	35.2865	35.6692	36.0934	36.4796	36.6869	36.8805	37.0679
0	Dan_baIEA_QU
MERC	FTT Resource prices or costs (2013$/GJ or 2013$/MWh)
	2005	2006	2007	2008	2009	2010	2011	2012	2013	2014	2015	2016	2017	2018	2019	2020	2021	2022	2023	2024	2025	2026	2027	2028	2029	2030	2031	2032	2033	2034	2035	2036	2037	2038	2039	2040	2041	2042	2043	2044	2045	2046	2047	2048	2049	2050	2051	2052	2053
Oil	0	0	0	0	0	0	0	0	49.1503	49.1503	49.1503	49.1503	44.7675	45.1805	45.7438	45.5874	45.9554	46.4773	47.4008	48.1387	48.8704	49.4501	50.0376	50.5836	51.1245	51.6333	51.9979	52.3591	52.7254	53.0943	53.4658	53.8425	54.2226	54.6002	54.9864	55.3812	55.7803	56.1812	56.5821	56.983	57.3847	57.7838	58.1864	58.5925	59.0029	59.4046	59.7174	59.9981	60.2729
Coal	0	0	0	0	0	0	0	0	3.66835	3.66835	3.66835	3.66835	3.65107	3.66057	3.67008	3.66576	3.67094	3.6744	3.68908	3.69945	3.70982	3.72105	3.73228	3.74438	3.75647	3.76943	3.78325	3.79621	3.8109	3.82559	3.84028	3.8541	3.86879	3.88434	3.89989	3.91544	3.93272	3.95	3.96728	3.98456	4.0027	4.01998	4.03812	4.05713	4.07527	4.09428	4.10724	4.11674	4.12711
Gas	0	0	0	0	0	0	0	0	29.1498	29.1498	29.1498	29.1498	25.2586	25.5411	25.8867	25.8737	26.2461	26.577	27.2007	27.5886	28.0733	28.4656	28.8863	29.2889	29.6967	30.0682	30.412	30.7343	31.0591	31.3874	31.7175	32.0294	32.3438	32.6652	32.9884	33.3149	33.6519	33.9966	34.3474	34.7059	35.0739	35.4437	35.8247	36.2178	36.6558	37.0844	37.2753	37.468	37.6606
0	Dan_baIEA_SO
MERC	FTT Resource prices or costs (2013$/GJ or 2013$/MWh)
	2005	2006	2007	2008	2009	2010	2011	2012	2013	2014	2015	2016	2017	2018	2019	2020	2021	2022	2023	2024	2025	2026	2027	2028	2029	2030	2031	2032	2033	2034	2035	2036	2037	2038	2039	2040	2041	2042	2043	2044	2045	2046	2047	2048	2049	2050	2051	2052	2053
Oil	0	0	0	0	0	0	0	0	49.1503	49.1503	49.1503	49.1503	44.7675	45.1805	45.7438	45.5874	45.7852	46.136	46.8185	47.3352	47.9019	48.3823	48.8514	49.2903	49.7352	50.1577	50.4558	50.7504	51.0545	51.3655	51.6852	52.0126	52.3487	52.6839	53.0321	53.3906	53.7561	54.125	54.4965	54.8689	55.2447	55.6188	55.9972	56.3799	56.767	57.1462	57.4426	57.7087	57.9687
Coal	0	0	0	0	0	0	0	0	3.66835	3.66835	3.66835	3.66835	3.65107	3.66057	3.67008	3.66576	3.67094	3.6744	3.68908	3.69945	3.70982	3.72105	3.73315	3.74438	3.75734	3.76943	3.78325	3.79708	3.8109	3.82559	3.84114	3.85496	3.86965	3.88434	3.89989	3.9163	3.93272	3.95	3.96728	3.98542	4.0027	4.02084	4.03898	4.05713	4.07613	4.09514	4.10724	4.1176	4.12711
Gas	0	0	0	0	0	0	0	0	29.1498	29.1498	29.1498	29.1498	25.2586	25.5411	25.8867	25.8737	26.1666	26.4119	26.9156	27.2128	27.6327	27.9455	28.3265	28.6574	29.0358	29.3701	29.6803	29.9714	30.2669	30.5676	30.8699	31.1585	31.4488	31.7443	32.0415	32.3404	32.648	32.9616	33.2786	33.6026	33.9344	34.2653	34.6048	34.9547	35.3115	35.6848	35.8878	36.0804	36.2688
0	Dan_ba
MERC	FTT Resource prices or costs (2013$/GJ or 2013$/MWh)
	2005	2006	2007	2008	2009	2010	2011	2012	2013	2014	2015	2016	2017	2018	2019	2020	2021	2022	2023	2024	2025	2026	2027	2028	2029	2030	2031	2032	2033	2034	2035	2036	2037	2038	2039	2040	2041	2042	2043	2044	2045	2046	2047	2048	2049	2050	2051	2052	2053
Oil	0	0	0	0	0	0	0	0	49.1503	49.1503	49.1503	49.1503	45.1165	45.7645	46.1256	46.1567	46.6466	46.8496	47.1451	47.3741	47.622	47.8518	48.0972	48.3097	48.5222	48.7339	48.9516	49.1089	49.3214	49.4761	49.699	49.8406	49.9936	50.162	50.34	50.5016	50.6623	50.8204	50.9793	51.1323	51.2783	51.4174	51.5409	51.661	51.7776	51.8994	52.0178	52.1336	52.239
Coal	0	0	0	0	0	0	0	0	3.66835	3.66835	3.66835	3.66835	3.6528	3.61306	3.61738	3.61046	3.61306	3.61392	3.62083	3.61392	3.60701	3.59059	3.56986	3.54912	3.53098	3.51629	3.50506	3.49815	3.4921	3.49383	3.49124	3.49037	3.49297	3.48865	3.49037	3.49124	3.4921	3.49297	3.49556	3.50074	3.50074	3.5042	3.50765	3.51456	3.51975	3.52493	3.52925	3.53012	3.53012
Gas	0	0	0	0	0	0	0	0	29.1498	29.1498	29.1498	29.1498	25.1229	25.732	26.1121	26.1208	26.4197	26.6072	26.9623	27.0314	27.1644	27.1834	27.2085	27.2301	27.2621	27.326	27.3562	27.3873	27.4435	27.4651	27.5325	27.6042	27.675	27.7908	27.9057	28.0215	28.1597	28.317	28.4854	28.6643	28.844	29.0297	29.2155	29.4038	29.5939	29.7883	29.885	29.9827	30.0742
0	Dan_ba_QU
MERC	FTT Resource prices or costs (2013$/GJ or 2013$/MWh)
	2005	2006	2007	2008	2009	2010	2011	2012	2013	2014	2015	2016	2017	2018	2019	2020	2021	2022	2023	2024	2025	2026	2027	2028	2029	2030	2031	2032	2033	2034	2035	2036	2037	2038	2039	2040	2041	2042	2043	2044	2045	2046	2047	2048	2049	2050	2051	2052	2053
Oil	0	0	0	0	0	0	0	0	49.1503	49.1503	49.1503	49.1503	45.1165	45.7645	46.1256	46.1567	46.7356	46.8747	47.2479	47.4535	47.7119	47.9529	48.2147	48.4333	48.6613	48.8825	49.121	49.2851	49.5106	49.6739	49.9184	50.0238	50.2597	50.4109	50.6355	50.7901	50.9595	51.1305	51.2999	51.4614	51.6152	51.7629	51.8934	52.0221	52.1483	52.2787	52.4074	52.5336	52.6485
Coal	0	0	0	0	0	0	0	0	3.66835	3.66835	3.66835	3.66835	3.6528	3.61306	3.61738	3.61046	3.61306	3.61392	3.62083	3.61478	3.60701	3.59059	3.57072	3.54912	3.53184	3.51629	3.50593	3.49901	3.4921	3.49383	3.48951	3.49988	3.49297	3.49383	3.49469	3.49297	3.49297	3.49383	3.49556	3.50161	3.50161	3.50506	3.50852	3.51543	3.51975	3.5258	3.52925	3.53012	3.53098
Gas	0	0	0	0	0	0	0	0	29.1498	29.1498	29.1498	29.1498	25.1229	25.732	26.1121	26.1208	26.462	26.6841	27.0936	27.1783	27.3381	27.3649	27.3968	27.4236	27.4824	27.5385	27.5688	27.6016	27.6612	27.6837	27.7554	27.7727	27.9135	28.0007	28.1424	28.2884	28.4526	28.6245	28.8025	28.9865	29.1697	29.3589	29.5472	29.7382	29.9317	30.1287	30.2254	30.3239	30.4155
0	Dan_ba_SO
MERC	FTT Resource prices or costs (2013$/GJ or 2013$/MWh)
	2005	2006	2007	2008	2009	2010	2011	2012	2013	2014	2015	2016	2017	2018	2019	2020	2021	2022	2023	2024	2025	2026	2027	2028	2029	2030	2031	2032	2033	2034	2035	2036	2037	2038	2039	2040	2041	2042	2043	2044	2045	2046	2047	2048	2049	2050	2051	2052	2053
Oil	0	0	0	0	0	0	0	0	49.1503	49.1503	49.1503	49.1503	45.1165	45.7645	46.1256	46.1567	46.6449	46.8419	47.1313	47.3499	47.5909	47.8104	48.0445	48.2441	48.4436	48.6061	48.8376	48.9853	49.1486	49.3128	49.527	49.654	49.8026	49.9555	50.0964	50.2502	50.3936	50.5404	50.689	50.829	50.9621	51.0856	51.1936	51.2947	51.3932	51.496	51.5971	51.661	51.7733
Coal	0	0	0	0	0	0	0	0	3.66835	3.66835	3.66835	3.66835	3.6528	3.61306	3.61738	3.61046	3.61306	3.61392	3.62083	3.61392	3.60701	3.59059	3.56986	3.54912	3.53098	3.51629	3.50506	3.49815	3.4921	3.49383	3.49124	3.49124	3.49037	3.48605	3.49383	3.49037	3.49383	3.49556	3.49642	3.50161	3.50161	3.5042	3.50765	3.51456	3.51975	3.52493	3.52925	3.53012	3.53012
Gas	0	0	0	0	0	0	0	0	29.1498	29.1498	29.1498	29.1498	25.1229	25.732	26.1121	26.1208	26.3808	26.577	26.9044	26.9804	27.1187	27.1454	27.2025	27.2266	27.2603	27.3191	27.345	27.3701	27.3986	27.421	27.4884	27.5515	27.6388	27.7623	27.8331	27.9714	28.1122	28.2841	28.4751	28.6729	28.8561	29.028	29.2025	29.3796	29.5567	29.7382	29.8323	29.9282	30.0181
0	Dan_2C
MERC	FTT Resource prices or costs (2013$/GJ or 2013$/MWh)
	2005	2006	2007	2008	2009	2010	2011	2012	2013	2014	2015	2016	2017	2018	2019	2020	2021	2022	2023	2024	2025	2026	2027	2028	2029	2030	2031	2032	2033	2034	2035	2036	2037	2038	2039	2040	2041	2042	2043	2044	2045	2046	2047	2048	2049	2050	2051	2052	2053
Oil	0	0	0	0	0	0	0	0	49.1503	49.1503	49.1503	49.1503	44.8781	45.5226	45.8785	45.9788	46.3226	46.3062	46.3218	46.3053	46.2224	46.0634	46.0211	45.9995	46.0159	46.0591	46.1818	46.3235	46.4531	46.5939	46.7442	46.8868	47.0337	47.1823	47.3421	47.5054	47.6704	47.8345	48.0013	48.1603	48.3184	48.467	48.5991	48.7227	48.8419	48.8894	49.0251	49.1503	49.2748
Coal	0	0	0	0	0	0	0	0	3.66835	3.66835	3.66835	3.66835	3.64589	3.60614	3.6096	3.57245	3.53444	3.49729	3.4705	3.44372	3.42299	3.40398	3.38843	3.37201	3.35473	3.33832	3.32449	3.32018	3.31586	3.31067	3.30549	3.30549	3.30376	3.29858	3.29339	3.25279	3.25279	3.25106	3.25106	3.25538	3.25106	3.25538	3.25711	3.2597	3.26143	3.26402	3.26143	3.2597	3.25624
Gas	0	0	0	0	0	0	0	0	29.1498	29.1498	29.1498	29.1498	24.9363	25.5696	25.9316	25.9316	26.3255	26.5182	26.7722	26.7446	26.7005	26.5657	26.4888	26.4396	26.4007	26.3247	26.278	26.2823	26.2089	26.1605	26.1251	26.1156	26.1242	26.145	26.1752	26.2322	26.3083	26.3973	26.526	26.615	26.7584	26.9001	27.0357	27.1722	27.3087	27.1981	27.2137	27.2776	27.3338
0	Dan_2C_QU
MERC	FTT Resource prices or costs (2013$/GJ or 2013$/MWh)
	2005	2006	2007	2008	2009	2010	2011	2012	2013	2014	2015	2016	2017	2018	2019	2020	2021	2022	2023	2024	2025	2026	2027	2028	2029	2030	2031	2032	2033	2034	2035	2036	2037	2038	2039	2040	2041	2042	2043	2044	2045	2046	2047	2048	2049	2050	2051	2052	2053
Oil	0	0	0	0	0	0	0	0	49.1503	49.1503	49.1503	49.1503	44.8781	45.5226	45.8785	45.9788	46.4073	46.4047	46.4298	46.4289	46.3503	46.2025	46.1714	46.1637	46.1896	46.2449	46.3874	46.5991	46.7425	46.9507	47.1537	47.2998	47.5036	47.6583	47.8769	48.0453	48.2639	48.4289	48.6467	48.803	48.9741	49.1391	49.2868	49.4225	49.5538	49.6039	49.7517	49.8864	50.0203
Coal	0	0	0	0	0	0	0	0	3.66835	3.66835	3.66835	3.66835	3.64589	3.60614	3.6096	3.57245	3.53444	3.49729	3.4705	3.44458	3.42299	3.40398	3.38843	3.37201	3.3556	3.33832	3.32449	3.32018	3.31586	3.31154	3.30635	3.30549	3.30376	3.29858	3.29339	3.25365	3.25279	3.25106	3.25106	3.25538	3.25106	3.25538	3.25711	3.2597	3.26143	3.26402	3.26143	3.26056	3.25624
Gas	0	0	0	0	0	0	0	0	29.1498	29.1498	29.1498	29.1498	24.9363	25.5696	25.9316	25.9307	26.4102	26.6227	26.9139	26.8949	26.8569	26.7204	26.6443	26.5968	26.5614	26.4871	26.443	26.4508	26.4016	26.3221	26.2988	26.297	26.3091	26.3342	26.3877	26.4197	26.5078	26.6236	26.7437	26.8361	26.9873	27.1368	27.2785	27.421	27.5627	27.4444	27.4599	27.5247	27.5817
0	Dan_2C_SO
MERC	FTT Resource prices or costs (2013$/GJ or 2013$/MWh)
	2005	2006	2007	2008	2009	2010	2011	2012	2013	2014	2015	2016	2017	2018	2019	2020	2021	2022	2023	2024	2025	2026	2027	2028	2029	2030	2031	2032	2033	2034	2035	2036	2037	2038	2039	2040	2041	2042	2043	2044	2045	2046	2047	2048	2049	2050	2051	2052	2053
Oil	0	0	0	0	0	0	0	0	49.1503	49.1503	49.1503	49.1503	44.8781	45.5226	45.8785	45.9788	46.2181	46.1507	46.0971	45.9451	45.7395	45.5131	45.3705	45.2997	45.2591	45.2565	45.2833	45.3749	45.4276	45.5468	45.6686	45.7801	45.8984	46.0211	46.1593	46.3045	46.4539	46.606	46.7632	46.9153	47.0673	47.2116	47.3412	47.4622	47.5805	47.6263	47.7602	47.889	48.0186
Coal	0	0	0	0	0	0	0	0	3.66835	3.66835	3.66835	3.66835	3.64589	3.60614	3.6096	3.57245	3.53444	3.49729	3.4705	3.44372	3.42299	3.40398	3.38843	3.37201	3.3556	3.33832	3.32449	3.32018	3.31586	3.31067	3.30549	3.30549	3.30376	3.29858	3.29253	3.25279	3.25279	3.25106	3.25106	3.25538	3.25106	3.25538	3.25711	3.2597	3.26143	3.26402	3.26143	3.2597	3.25538
Gas	0	0	0	0	0	0	0	0	29.1498	29.1498	29.1498	29.1498	24.9363	25.5696	25.9316	25.9307	26.2893	26.4733	26.7135	26.7022	26.6815	26.5389	26.437	26.3454	26.3048	26.2055	26.1225	26.1294	26.043	25.9566	25.9238	25.91	25.916	25.9359	25.9644	26.024	26.1052	26.2253	26.3515	26.4655	26.6072	26.761	26.9087	27.0573	27.205	27.0798	27.0927	27.1567	27.2146
0	Dan_1-5C
MERC	FTT Resource prices or costs (2013$/GJ or 2013$/MWh)
	2005	2006	2007	2008	2009	2010	2011	2012	2013	2014	2015	2016	2017	2018	2019	2020	2021	2022	2023	2024	2025	2026	2027	2028	2029	2030	2031	2032	2033	2034	2035	2036	2037	2038	2039	2040	2041	2042	2043	2044	2045	2046	2047	2048	2049	2050	2051	2052	2053
Oil	0	0	0	0	0	0	0	0	49.1503	49.1503	49.1503	49.1503	44.7934	45.4371	45.793	45.7481	45.5062	45.3377	45.1442	44.974	44.5014	43.9796	43.5018	43.0379	42.6033	42.2266	41.8672	41.4793	41.0741	40.6732	40.2888	39.9164	39.6037	39.3471	39.0455	39.0006	38.8304	38.6801	38.5557	38.4814	38.4114	38.3596	38.312	38.2783	38.2455	38.1712	38.2801	38.4848	38.7077
Coal	0	0	0	0	0	0	0	0	3.66835	3.66835	3.66835	3.66835	3.64416	3.60355	3.60787	3.56208	3.50247	3.44631	3.39361	3.34609	3.30635	3.27007	3.24156	3.2165	3.1949	3.17762	3.16121	3.14911	3.14134	3.13443	3.12665	3.11974	3.11542	3.10937	3.10419	3.04285	3.04457	3.04544	3.04544	3.04371	3.04803	3.05062	3.05235	3.05321	3.05494	3.05667	3.05235	3.05581	3.05494
Gas	0	0	0	0	0	0	0	0	29.1498	29.1498	29.1498	29.1498	24.8715	25.5065	25.8685	25.8616	26.2046	26.2245	26.2858	26.0059	25.7061	25.3035	24.9631	24.6348	24.3289	23.8028	23.3432	22.9985	22.7125	22.5898	22.4239	22.3246	22.2036	22.0775	21.9392	21.7284	21.7189	21.7163	21.7215	21.7379	21.7872	21.8883	21.9488	22.0507	22.1414	21.7068	21.6239	21.6438	21.6654
0	Dan_1-5C_QU
MERC	FTT Resource prices or costs (2013$/GJ or 2013$/MWh)
	2005	2006	2007	2008	2009	2010	2011	2012	2013	2014	2015	2016	2017	2018	2019	2020	2021	2022	2023	2024	2025	2026	2027	2028	2029	2030	2031	2032	2033	2034	2035	2036	2037	2038	2039	2040	2041	2042	2043	2044	2045	2046	2047	2048	2049	2050	2051	2052	2053
Oil	0	0	0	0	0	0	0	0	49.1503	49.1503	49.1503	49.1503	44.7986	45.4423	45.7999	45.7559	45.5796	45.5191	45.3896	45.3196	45.0025	44.6051	44.2975	43.9727	43.6547	43.38	43.1182	42.834	42.535	42.237	41.9311	41.672	41.4205	41.1769	40.9549	40.878	40.7104	40.567	40.4382	40.3259	40.2516	40.1773	40.1022	40.0391	39.9717	39.8404	39.9207	40.0037	40.0987
Coal	0	0	0	0	0	0	0	0	3.66835	3.66835	3.66835	3.66835	3.64416	3.60355	3.60787	3.56208	3.50247	3.44631	3.39361	3.34609	3.30635	3.27007	3.24156	3.21564	3.19577	3.17762	3.16121	3.14911	3.14134	3.13443	3.12579	3.11974	3.11542	3.10937	3.10419	3.04285	3.04457	3.04457	3.04544	3.04371	3.04717	3.05062	3.05149	3.05321	3.05408	3.05667	3.05149	3.05581	3.05494
Gas	0	0	0	0	0	0	0	0	29.1498	29.1498	29.1498	29.1498	24.8715	25.5065	25.8685	25.8625	26.2633	26.2936	26.3998	26.1009	25.7951	25.3786	25.0339	24.7117	24.4041	23.8762	23.4322	23.1108	22.8404	22.7116	22.5682	22.4412	22.3375	22.2123	22.0827	21.8865	21.8857	21.8909	21.9038	21.9289	21.9963	22.1077	22.1742	22.2805	22.373	21.9557	21.8641	21.8848	21.9073
0	Dan_1-5C_SO
MERC	FTT Resource prices or costs (2013$/GJ or 2013$/MWh)
	2005	2006	2007	2008	2009	2010	2011	2012	2013	2014	2015	2016	2017	2018	2019	2020	2021	2022	2023	2024	2025	2026	2027	2028	2029	2030	2031	2032	2033	2034	2035	2036	2037	2038	2039	2040	2041	2042	2043	2044	2045	2046	2047	2048	2049	2050	2051	2052	2053
Oil	0	0	0	0	0	0	0	0	49.1503	49.1503	49.1503	49.1503	44.7934	45.4371	45.793	45.7481	45.3636	45.1191	44.8176	44.5368	43.9165	43.2513	42.6249	42.0124	41.4171	40.8935	40.3847	39.843	39.2313	38.6576	38.1012	37.5518	37.1163	36.6403	36.2558	36.1185	35.8282	35.5742	35.3979	35.2251	35.0852	35.023	34.953	34.8908	34.832	34.6722	34.813	35.0964	35.4532
Coal	0	0	0	0	0	0	0	0	3.66835	3.66835	3.66835	3.66835	3.64416	3.60355	3.60787	3.56208	3.50247	3.44631	3.39361	3.34609	3.30635	3.27007	3.24156	3.21564	3.19577	3.17762	3.16121	3.14911	3.14134	3.13443	3.12665	3.1206	3.11542	3.10937	3.10505	3.04371	3.04457	3.04544	3.0463	3.04457	3.04803	3.05149	3.05321	3.05408	3.05494	3.05753	3.05235	3.05667	3.05494
Gas	0	0	0	0	0	0	0	0	29.1498	29.1498	29.1498	29.1498	24.8715	25.5065	25.8685	25.8616	26.1752	26.2029	26.2737	25.9359	25.567	25.0495	24.6477	24.2425	23.8261	23.1773	22.5846	22.1155	21.7475	21.6248	21.433	21.3293	21.179	21.0649	20.8939	20.6805	20.6839	20.7021	20.7548	20.8489	20.9517	21.1228	21.2325	21.3906	21.5107	21.0235	20.9431	20.9924	21.0468
[truncated: 12 more columns]

## Sheet: Coal
0	Dan_baIEA_covid_S3
RERY	Primary energy supply (before trade), PJ, NER x NR
	2005	2006	2007	2008	2009	2010	2011	2012	2013	2014	2015	2016	2017	2018	2019	2020	2021	2022	2023	2024	2025	2026	2027	2028	2029	2030	2031	2032	2033	2034	2035	2036	2037	2038	2039	2040	2041	2042	2043	2044	2045	2046	2047	2048	2049	2050	2051	2052	2053
1 Belgium	2.3944	0.6371	0	0	0	0.3626	0.3173	0.4533	0.476	0.4306	0.34	0.3173	0.3241	0.3359	0.3486	0.3427	0.3501	0.3545	0.3758	0.3899	0.4058	0.4236	0.4428	0.4619	0.4846	0.5076	0.5343	0.5604	0.5899	0.6219	0.6565	0.689	0.7254	0.7647	0.8073	0.8524	0.9031	0.9571	1.0142	1.0743	1.1378	1.2063	1.2793	1.3573	1.4398	1.5278	1.5886	1.6382	1.6884
2 Denmark	0	0	0	0	0	0	0	0	0	0	0	0	0.007	0.0071	0.0072	0.0072	0.0072	0.0073	0.0075	0.0076	0.0078	0.0079	0.0081	0.0083	0.0085	0.0086	0.0089	0.0091	0.0093	0.0095	0.0098	0.01	0.0102	0.0105	0.0108	0.011	0.0113	0.0117	0.012	0.0123	0.0126	0.013	0.0133	0.0137	0.0141	0.0144	0.0147	0.0149	0.0151
3 Germany	2363.79	2228.23	2276.17	2095.79	1942.03	1921.99	1955.12	1992.76	1886.35	1847.75	1800.49	1663.2	1682.22	1711.03	1741.79	1725.92	1742.92	1752.78	1802.72	1834.49	1869.8	1908.18	1948.76	1988.13	2033.97	2078.84	2130.03	2178.28	2231.32	2287.29	2346.14	2399.51	2457.63	2518.48	2582.51	2648.01	2719.41	2792.89	2867.94	2944.05	3021.77	3102.64	3185.8	3271.5	3358.75	3448.51	3507.06	3552.82	3598.16
4 Greece	357.469	342.075	351.233	340.364	342.311	306.282	314.215	336.815	281.699	267.292	237.612	166.323	170.16	175.661	181.632	177.688	180.743	182.245	192.483	198.854	206.058	214.111	222.767	231.242	241.412	251.498	263.325	274.589	287.297	300.986	315.668	329.002	343.846	359.738	376.767	394.488	414.305	435.042	456.539	478.656	501.505	525.681	550.851	577.129	604.103	632.139	647.313	656.944	666.115
5 Spain	262.293	253.256	228.451	175.603	159.555	138.013	110.896	103.026	73.8064	68.1698	52.1725	30.8225	31.1618	31.6829	32.2388	31.9635	32.2742	32.4578	33.3554	33.9292	34.5659	35.257	35.987	36.6952	37.518	38.3234	39.2403	40.1049	41.0538	42.054	43.1045	44.0582	45.0951	46.1796	47.3195	48.4848	49.7528	51.0566	52.3874	53.7361	55.1123	56.5428	58.0125	59.5259	61.0655	62.6482	63.69	64.5109	65.325
6 France	16.042	11.752	10.972	7.202	3.822	6.786	3.874	7.54	8.138	7.8	0	0	0.0022	0.0023	0.0023	0.0023	0.0023	0.0023	0.0024	0.0024	0.0025	0.0025	0.0026	0.0026	0.0027	0.0027	0.0028	0.0029	0.0029	0.003	0.0031	0.0031	0.0032	0.0033	0.0034	0.0035	0.0035	0.0036	0.0037	0.0038	0.0039	0.004	0.0041	0.0042	0.0044	0.0045	0.0045	0.0046	0.0047
7 Ireland	0	0	0	0	0	0	0	0	0	0	0	0	0.0007	0.0007	0.0007	0.0007	0.0007	0.0007	0.0007	0.0007	0.0008	0.0008	0.0008	0.0008	0.0008	0.0008	0.0009	0.0009	0.0009	0.0009	0.001	0.001	0.001	0.001	0.001	0.0011	0.0011	0.0011	0.0012	0.0012	0.0012	0.0013	0.0013	0.0013	0.0014	0.0014	0.0014	0.0014	0.0015
8 Italy	2.5258	0.5583	4.2007	3.1107	1.9142	2.6853	2.446	2.127	1.9408	2.2865	2.1536	0	0.0085	0.0087	0.0088	0.0088	0.0088	0.0089	0.0091	0.0093	0.0095	0.0097	0.0099	0.0101	0.0103	0.0105	0.0108	0.011	0.0113	0.0115	0.0118	0.0121	0.0124	0.0127	0.013	0.0133	0.0137	0.014	0.0144	0.0148	0.0152	0.0155	0.016	0.0164	0.0168	0.0172	0.0175	0.0178	0.018
9 Luxembourg	0	0	0	0	0	0	0	0	0	0	0	0	0	0	0	0	0	0	0	0	0	0	0	0	0	0	0	0	0	0	0	0	0	0	0	0	0	0	0	0	0	0	0	0	0	0	0	0	0
10 Netherlands	0	0	0	0	0	0	0	0	0	0	0	0	0.0494	0.0503	0.0512	0.0508	0.0513	0.0516	0.053	0.054	0.055	0.0561	0.0573	0.0585	0.0598	0.0611	0.0626	0.064	0.0655	0.0672	0.0689	0.0704	0.0721	0.0739	0.0757	0.0776	0.0797	0.0818	0.084	0.0862	0.0885	0.0908	0.0932	0.0957	0.0983	0.1009	0.1026	0.104	0.1054
11 Austria	0	0	0	0	0	0	0	0	0	0	0	0	0	0	0	0	0	0	0	0	0	0	0	0	0	0	0	0	0	0	0	0	0	0	0	0	0	0	0	0	0	0	0	0	0	0	0	0	0
12 Portugal	0	0	0	0	0	0	0	0	0	0	0	0	0	0	0	0	0	0	0	0	0	0	0	0	0	0	0	0	0	0	0	0	0	0	0	0	0	0	0.0001	0.0001	0.0001	0.0001	0.0001	0.0001	0.0001	0.0001	0.0001	0.0001	0.0001
13 Finland	0	0	0	0	0	0	0	0	0	0	0	0	0	0	0	0	0	0	0	0	0	0	0	0	0	0	0	0	0	0	0	0	0	0	0	0	0	0	0	0	0	0	0	0	0	0	0	0	0
14 Sweden	0	0	0	0	0	0	0	0	0	0	0	0	0.0001	0.0001	0.0001	0.0001	0.0001	0.0001	0.0001	0.0001	0.0001	0.0001	0.0001	0.0001	0.0001	0.0001	0.0001	0.0001	0.0001	0.0001	0.0001	0.0001	0.0001	0.0001	0.0001	0.0001	0.0001	0.0001	0.0001	0.0001	0.0001	0.0001	0.0001	0.0002	0.0002	0.0002	0.0002	0.0002	0.0002
15 UK	505.18	453.668	425.083	449.323	438.56	453.869	458.007	420.337	317.05	289.907	214.153	104.725	105.859	107.64	109.539	108.661	109.742	110.398	113.444	115.408	117.585	119.945	122.436	124.856	127.662	130.411	133.535	136.486	139.721	143.13	146.71	149.969	153.508	157.21	161.1	165.077	169.401	173.849	178.389	182.995	187.696	192.582	197.605	202.778	208.043	213.458	217.078	219.966	222.836
16 Czech Republic	986.828	999.037	996.626	953.968	873.085	871.947	879.324	848.802	744.039	710.876	708	674.892	682.219	689.506	697.376	687.431	689.981	689.78	704.444	712.092	720.863	730.545	740.796	750.367	762.014	773.038	786.002	797.623	810.598	824.242	838.504	850.536	863.818	877.627	892.083	906.593	922.573	938.733	954.892	970.87	986.826	1003.22	1019.75	1036.46	1053.05	1069.76	1076.68	1079.52	1081.99
17 Estonia	0	0	0	0	0	0	0	0	0	0	0	0	0	0	0	0	0	0	0	0	0	0	0	0	0	0	0	0	0	0	0	0	0	0	0	0	0	0	0	0	0	0	0	0	0	0	0	0	0
18 Cyprus	0	0	0	0	0	0	0	0	0	0	0	0	0	0	0	0	0	0	0	0	0	0	0	0	0	0	0	0	0	0	0	0	0	0	0	0	0	0	0	0	0	0	0	0	0	0	0	0	0
19 Latvia	0	0	0	0	0	0	0	0	0	0	0	0	0	0	0	0	0	0	0	0	0	0	0	0	0	0	0	0	0	0	0	0	0	0	0	0	0	0	0	0	0	0	0	0	0	0	0	0	0
20 Lithuania	0	0	0	0	0	0	0	0	0	0	0	0	0	0	0	0	0	0	0	0	0	0	0	0	0	0	0	0	0	0	0	0	0	0	0	0	0	0	0	0	0	0	0	0	0	0	0	0	0
21 Hungary	73.1914	73.5453	74.2241	70.9062	65.1485	66.7072	68.8915	67.2596	67.4795	66.4845	63.5675	61.2311	61.9388	61.9779	62.0613	60.4544	60.0486	59.3902	60.1022	60.1481	60.2841	60.4885	60.7279	60.891	61.2207	61.4773	61.8833	62.1532	62.5195	62.9211	63.3521	63.5757	63.8843	64.2161	64.5794	64.9258	65.3683	65.8014	66.2112	66.5847	66.9351	67.2987	67.6524	68.0012	68.3207	68.6329	68.1987	67.4682	66.7244
22 Malta	0	0	0	0	0	0	0	0	0	0	0	0	0	0	0	0	0	0	0	0	0	0	0	0	0	0	0	0	0	0	0	0	0	0	0	0	0	0	0	0	0	0	0	0	0	0	0	0	0
23 Poland	2882.9	2828.52	2616.28	2550.2	2362.09	2318.7	2332.85	2420.78	2392.16	2262.29	2255.29	2190.03	2213.77	2249.1	2286.81	2266.41	2286.94	2298.57	2359.94	2398.64	2441.65	2488.35	2537.66	2585.35	2640.89	2695.11	2756.91	2814.97	2878.71	2945.85	3016.29	3079.9	3149.08	3221.35	3297.24	3374.66	3458.92	3545.39	3633.45	3722.5	3813.17	3907.26	4003.74	4102.89	4203.51	4306.74	4373.14	4424.46	4475.16
24 Slovenia	49.5723	50.6419	51.8849	49.607	48.5596	50.0723	50.2627	45.7703	45.0042	34.2502	36.1088	39.4345	39.8803	39.857	39.8603	38.8062	38.5046	38.0455	38.44	38.4178	38.4503	38.5235	38.6165	38.6607	38.8054	38.9028	39.0893	39.1898	39.3464	39.5213	39.7107	39.7713	39.8801	39.9992	40.1335	40.2535	40.426	40.5881	40.731	40.847	40.944	41.0427	41.1293	41.2064	41.2597	41.3015	40.9151	40.3604	39.7982
25 Slovakia	26.6744	23.5199	23.0585	26.1151	27.351	25.6824	25.188	23.7566	24.4641	24.2562	20.7376	18.9133	19.1402	10.204	5.9231	3.6827	2.6439	2.0613	1.7862	1.594	1.4783	1.4107	1.3741	1.3553	1.3593	1.3727	1.4031	1.4363	1.4823	1.5376	1.6019	1.6627	1.7347	1.8156	1.9055	2.0027	2.1144	2.2349	2.3637	2.5004	2.6461	2.8044	2.9743	3.1569	3.3507	3.5587	3.6985	3.8104	3.9237
26 Bulgaria	174.922	180.342	201.436	203.441	192.529	206.819	259.975	234.911	200.444	214.349	244.994	213.593	215.917	218.821	221.933	219.372	220.796	221.345	226.688	229.806	233.312	237.143	241.189	245.047	249.617	254.02	259.101	263.783	268.955	274.396	280.094	285.098	290.569	296.271	302.248	308.301	314.917	321.663	328.479	335.305	342.197	349.316	356.562	363.958	371.39	378.956	383.147	385.938	388.626
27 Romania	242.556	271.213	287.137	291.449	274.796	247.142	278.92	265.682	194.955	186.257	197.245	177.268	179.219	180.944	182.818	179.954	180.413	180.142	183.806	185.603	187.69	190.011	192.474	194.75	197.564	200.205	203.348	206.127	209.252	212.542	215.983	218.826	221.987	225.274	228.719	232.166	235.984	239.836	243.673	247.45	251.206	255.062	258.94	262.853	266.716	270.599	271.923	272.182	272.343
28 Norway	41.3351	67.2995	114.451	96.383	74.2121	54.3735	38.9466	34.5349	52.1255	47.0675	31.0786	22.9858	23.2406	23.3159	23.407	22.8888	22.8003	22.6191	22.9335	23.0071	23.1134	23.2444	23.3882	23.5043	23.681	23.8311	24.0357	24.1906	24.3804	24.583	24.7962	24.933	25.1003	25.2753	25.461	25.6394	25.8518	26.0594	26.257	26.4394	26.6112	26.7855	26.9535	27.1165	27.2656	27.4081	27.2794	27.0409	26.7938
29 Switzerland	0	0	0	0	0	0	0	0	0	0	0	0	0	0	0	0	0	0	0	0	0	0	0	0	0	0	0	0	0	0	0	0	0	0	0	0	0	0	0	0	0	0	0	0	0	0	0	0	0
30 Iceland	0	0	0	0	0	0	0	0	0	0	0	0	0	0	0	0	0	0	0	0	0	0	0	0	0	0	0	0	0	0	0	0	0	0	0	0	0	0	0	0	0	0	0	0	0	0	0	0	0
31 Croatia	0	0	0	0	0	0	0	0	0	0	0	0	0	0	0	0	0	0	0	0	0	0	0	0	0	0	0	0	0	0	0	0	0	0	0	0	0	0	0	0	0	0	0	0	0	0	0	0	0
32 Turkey	442.744	542.11	628.418	685.518	700.789	700.903	695.852	651.228	566.957	578.352	535.846	648.854	656.91	645.296	634.133	604.77	589.089	571.069	567.314	556.536	546.627	537.312	528.232	518.351	509.907	500.68	492.638	483.291	474.652	466.169	457.781	447.688	438.222	428.886	419.736	410.432	401.754	392.969	384.015	374.851	365.601	356.512	347.466	338.517	329.564	320.758	308.431	295.219	282.616
33 Macedonia	0	0	0	0	0	0	0	0	0	0	0	0	0	0	0	0	0	0	0	0	0	0	0	0	0	0	0	0	0	0	0	0	0	0	0	0	0	0	0	0	0	0	0	0	0	0	0	0	0
34 USA	23667.2	24181.5	23801.8	24254.1	22195.7	22267.1	22456.4	20745	19978.8	20307.3	18056.9	14589.5	14748	14995.3	15259	15134.6	15283.9	15373.9	15797.6	16070.1	16372.2	16699.9	17045.8	17381.7	17771.3	18153	18586.9	18996.6	19445.7	19919.1	20416.2	20868.3	21359.6	21873.2	22413	22964.9	23565	24182.1	24812.1	25450.8	26102.7	26780.4	27476.7	28193.8	28923.6	29673.9	30173.3	30570.4	30964.7
35 Japan	27.1264	29.3437	27.7818	28.0143	26.196	24.8631	25.9558	27.0698	30.5179	32.1598	30.8628	31.4259	31.7678	32.2959	32.8591	32.5852	32.9015	33.0898	33.9973	34.5785	35.2233	35.9227	36.6612	37.3778	38.2097	39.024	39.9503	40.8241	41.7825	42.7924	43.8527	44.8157	45.8623	46.9565	48.1063	49.2813	50.5593	51.873	53.2136	54.5721	55.958	57.3981	58.8774	60.4003	61.9493	63.5412	64.5932	65.4249	66.2499
36 Canada	1446.67	1450.18	1554.77	1411.55	1288.91	1421.22	1413.34	1407.17	1472.57	1453.85	1288.31	1257.04	1270.68	1291.57	1313.85	1302.73	1315.16	1322.48	1358.46	1381.42	1406.9	1434.55	1463.74	1492.04	1524.92	1557.08	1593.67	1628.16	1665.99	1705.85	1747.69	1785.64	1826.88	1870	1915.28	1961.55	2011.86	2063.57	2116.3	2169.7	2224.15	2280.72	2338.79	2398.54	2459.28	2521.67	2562.65	2594.88	2626.82
37 Australia	8439.69	8533.05	9000.75	9039.73	9350.5	10323.1	9782.07	10272.4	11074.8	11950.8	12501	12226.8	12359.5	12562	12778.1	12669.2	12789.3	12859.8	13209	13431.5	13678.5	13946.5	14229.5	14503.8	14822.5	15134.2	15489	15823.2	16189.8	16576.1	16981.5	17349.1	17748.6	18166.1	18604.8	19052.8	19540.1	20040.7	20551.2	21068.1	21595.1	22142.5	22704.3	23282.3	23869.8	24473.2	24868.4	25178.7	25486
38 New Zealand	132.462	142.527	118.567	118.784	111.111	131.361	121.159	120.698	114.687	97.9343	81.024	68.3284	69.085	70.1936	71.3776	70.7091	71.3452	71.6973	73.6348	74.8492	76.2008	77.6701	79.2223	80.7227	82.4737	84.1821	86.133	87.964	89.9766	92.0979	94.3249	96.3327	98.5191	100.805	103.206	105.656	108.326	111.068	113.861	116.685	119.561	122.548	125.612	128.762	131.96	135.242	137.331	138.93	140.508
39 Russian Federation	6574.68	6657.81	6809.95	6991.92	6423.52	6954.53	6875.74	7738.53	7700.05	7932.73	8375.27	8745.14	8840.07	8987.58	9144.87	9069.72	9158.48	9211.71	9464.72	9627.17	9807.29	10002.7	10208.9	10409.2	10641.5	10869	11127.6	11371.8	11639.5	11921.6	12217.8	12487	12779.6	13085.5	13406.9	13735.4	14092.6	14459.9	14834.8	15214.8	15602.6	16005.6	16419.6	16845.9	17279.6	17725.4	18021.2	18255.9	18488.8
40 Rest of Annex I	0	0	0	0	0	0	0	0	0	0	0	0	0	0	0	0	0	0	0	0	0	0	0	0	0	0	0	0	0	0	0	0	0	0	0	0	0	0	0	0	0	0	0	0	0	0	0	0	0
41 China	51373.4	55862.4	60779.1	62263	65631.7	72117.2	78026.3	77583.2	79317.4	79620.1	78826.4	71967.1	72762.7	73587.6	74477.4	73430.4	73742.1	73754.9	75387.9	76258.8	77253.8	78350.4	79511.3	80600.3	81918.9	83171.9	84640.6	85965	87441.1	88994.4	90619.4	92001.9	93525.9	95111.8	96773.2	98444.7	100284	102147	104015	105869	107724	109633	111563	113519	115466	117432	118304	118720	119095
42 India	6837.39	7152.76	7584.26	8182.75	8868.59	8912.63	9292.77	9800.64	9933.98	10605.7	11034.7	11223.6	11347.5	11511.1	11686.3	11558.6	11643.8	11682.4	11978	12155	12353.3	12569.6	12798	13016.9	13274.9	13524.6	13811.7	14078	14371.7	14680.9	15005	15292.4	15606.2	15933.5	16277	16625.8	17006.7	17396	17790.5	18187.1	18588.7	19004.3	19428.5	19862.6	20300.4	20747.4	21008.4	21192.3	21371.1
43 Mexico	296.45	336.364	357.051	318.329	276.83	335.186	434.123	332.631	321.405	324.566	241.761	291.395	294.619	298.559	302.785	299.141	301.024	301.694	309.009	313.235	317.997	323.206	328.712	333.953	340.18	346.172	353.101	359.473	366.521	373.939	381.71	388.512	395.959	403.722	411.86	420.102	429.118	438.309	447.591	456.881	466.255	475.937	485.788	495.837	505.929	516.197	521.758	525.364	528.822
44 Brazil	103.971	95.7789	98.3746	111.406	93.7561	88.1214	89.34	105.389	138.101	128.119	128.386	110.353	111.573	113.383	115.316	114.26	115.309	115.901	119.052	121.037	123.245	125.644	128.178	130.63	133.488	136.279	139.464	142.456	145.744	149.209	152.847	156.133	159.71	163.45	167.379	171.391	175.76	180.248	184.822	189.45	194.166	199.064	204.09	209.259	214.51	219.9	223.362	226.033	228.672
45 Argentina	0.6176	3.483	2.7172	3.977	2.0256	1.6056	2.2232	2.3467	2.0503	1.408	0.8399	0.5681	0.5744	0.5844	0.595	0.5901	0.5962	0.5999	0.6169	0.628	0.6402	0.6535	0.6675	0.6811	0.6969	0.7124	0.7301	0.7468	0.7651	0.7844	0.8048	0.8233	0.8434	0.8645	0.8867	0.9094	0.9342	0.9597	0.9857	1.0122	1.0393	1.0674	1.0965	1.1264	1.1569	1.1883	1.2094	1.2262	1.2429
46 Colombia	1607.37	1785.13	1902.31	2000.28	1981.37	2023.36	2335.04	2422.7	2326.69	2410.56	2328.1	2463.19	2493.6	2510.56	2529.44	2474.74	2471.61	2457.14	2502.63	2518.96	2539.24	2562.54	2587.41	2608.85	2637.75	2663.34	2695.66	2721.74	2752.13	2784.04	2817.18	2840.57	2867.63	2895.47	2924.46	2952.28	2984.15	3015.11	3044.43	3071.41	3096.6	3121.61	3145.29	3167.76	3187.81	3206.36	3189.29	3157.58	3124.34
47 Rest of Latin America	232.449	227.587	193.982	165.59	119.622	96.6329	79.2346	55.2204	85.5831	112.849	85.3175	72.6889	73.4852	74.7177	76.0323	75.3966	76.136	76.5773	78.6951	80.0529	81.5591	83.1933	84.9192	86.5944	88.5392	90.4436	92.6103	94.6549	96.8978	99.2621	101.745	104.001	106.454	109.019	111.715	114.471	117.47	120.553	123.701	126.892	130.149	133.534	137.013	140.596	144.242	147.99	150.471	152.435	154.384
48 Korea	52.7828	52.6337	55.5815	53.4052	48.5134	40.1358	40.1358	39.0133	33.8153	32.567	32.8651	32.1571	32.5121	33.0277	33.5783	33.2602	33.5537	33.714	34.6172	35.181	35.8089	36.4915	37.2125	37.9088	38.722	39.5147	40.4202	41.2692	42.2024	43.1857	44.2176	45.1465	46.1579	47.2148	48.3248	49.4569	50.6902	51.9556	53.2438	54.5454	55.8699	57.2444	58.6533	60.1006	61.5684	63.0735	64.0245	64.7477	65.4604
49 Taiwan	0	0	0	0	0	0	0	0	0	0	0	0	0.0014	0.0014	0.0015	0.0015	0.0015	0.0015	0.0015	0.0015	0.0016	0.0016	0.0016	0.0017	0.0017	0.0018	0.0018	0.0018	0.0019	0.0019	0.002	0.002	0.0021	0.0021	0.0022	0.0022	0.0023	0.0023	0.0024	0.0025	0.0025	0.0026	0.0027	0.0027	0.0028	0.0029	0.0029	0.003	0.003
50 Indonesia	4112.72	5655.12	6011.83	5966.3	6983.67	7800.58	9752.54	10373.1	11243.9	11125	10260.5	10419	10533.2	10543.5	10560.6	10305.1	10242.5	10138.9	10255.6	10264.8	10288	10321.8	10360.7	10386.9	10439.3	10479.4	10542.7	10583.6	10639.3	10699.7	10764	10794.6	10837.9	10883.8	10933.7	10979.9	11039.9	11097.1	11149.3	11194.5	11234.6	11275.1	11312.5	11347.2	11375.7	11401	11313.4	11180.8	11045.6
51 Rest of ASEAN	1126.09	1202.01	1303.11	1239.68	1367.95	1438.03	1521.08	1396.42	1346.93	1341.52	1320.04	1344.97	1359.76	1026.4	791.114	605.072	484.002	392.729	332.387	281.442	241.823	210.449	185.148	164.158	147.261	132.918	121.179	110.894	102.31	94.9986	88.7373	82.9659	78.0963	73.8953	70.277	67.0962	64.4473	62.1274	60.0827	58.2694	56.6797	55.3353	54.1881	53.2277	52.4136	51.7607	50.4387	48.9694	47.6559
52 OPEC excl Venezuela	42.3768	45.0558	45.4506	44.0604	32.2368	30.4578	32.556	29.1066	30.7218	29.9166	33.7476	37.3566	37.7652	38.4067	39.0908	38.7739	39.1631	39.3993	40.4972	41.2052	41.99	42.8412	43.7401	44.6137	45.6266	46.6196	47.7483	48.8151	49.9849	51.2183	52.5139	53.6937	54.9759	56.3173	57.7275	59.1702	60.7396	62.3543	64.004	65.678	67.3877	69.166	70.9947	72.8794	74.7991	76.7744	78.0949	79.1487	80.1961
53 Rest of world	1578.61	1625.8	1556.65	1663.28	1569.9	1855.88	2066.03	1997.29	2015.54	1958.06	1940.01	2333.66	2359.52	2397.01	2437.06	2413.8	2435.12	2446.73	2512.46	2553.48	2599.16	2648.83	2701.3	2751.97	2811.16	2868.87	2934.81	2996.62	3064.58	3136.2	3211.38	3279.03	3352.72	3429.73	3510.62	3593.13	3683.03	3775.29	3869.22	3964.14	4060.74	4161.01	4263.79	4369.41	4476.52	4586.38	4655.71	4708.38	4760.28
54 Ukraine	1445.62	1473.44	1586.39	1572.17	1458.25	1407.37	1684.65	1678.95	1703.72	1347.22	844.702	838.253	847.515	861.612	876.654	869.008	877.354	882.227	906.581	922.089	939.312	958.011	977.763	996.914	1019.18	1040.97	1065.79	1089.17	1114.85	1141.91	1170.33	1196.1	1224.13	1253.45	1284.26	1315.74	1350.02	1385.26	1421.21	1457.63	1494.79	1533.41	1573.07	1613.91	1655.43	1698.11	1726.02	1747.9	1769.58
55 Saudi Arabia	0	0	0	0	0	0	0	0	0	0	0	0	0	0	0	0	0	0	0	0	0	0	0	0	0	0	0	0	0	0	0	0	0	0	0	0	0	0	0	0	0	0	0	0	0	0	0	0	0
56 Nigeria	0.2064	0.2064	0.5934	0.8256	0.8772	0.9804	0.8256	1.2384	1.1352	1.1868	1.2126	1.1868	1.1998	1.2202	1.242	1.2319	1.2443	1.2518	1.2868	1.3093	1.3343	1.3613	1.3899	1.4177	1.45	1.4816	1.5175	1.5514	1.5886	1.6278	1.6691	1.7066	1.7474	1.79	1.8349	1.8808	1.9307	1.982	2.0345	2.0877	2.1421	2.1986	2.2567	2.3166	2.3776	2.4404	2.4824	2.5159	2.5492
57 South Africa	5793.07	5787.65	5861.55	5967.8	5899.53	6026.65	5975.54	6113.18	6072.3	6171.87	6051.29	6052.21	6126.91	6176.88	6231.82	6105.54	6106.22	6078.89	6200.02	6249.39	6308.87	6376.19	6447.79	6511.2	6593.66	6668.27	6760.23	6837.06	6925.2	7017.72	7113.94	7186.14	7268.15	7352.73	7440.84	7526.64	7623.43	7718.63	7810.38	7896.9	7979.57	8062.53	8142.79	8220.71	8293.13	8362.4	8339.53	8278.43	8213.12
58 Rest of Africa	101.815	97.0778	91.8953	69.4904	78.1885	80.0298	98.2088	208.911	235.21	330.445	301.441	216.27	218.619	222.26	226.143	224.273	226.46	227.767	234.017	238.026	242.472	247.294	252.386	257.327	263.062	268.677	275.062	281.087	287.695	294.657	301.967	308.609	315.827	323.374	331.303	339.407	348.221	357.281	366.528	375.899	385.461	395.397	405.603	416.112	426.802	437.789	445.066	450.829	456.549
59 Africa OPEC	0	0	0	0	0	0	0	0	0	0	0	0	0.0036	0.0037	0.0038	0.0037	0.0038	0.0038	0.0039	0.004	0.004	0.0041	0.0042	0.0043	0.0044	0.0045	0.0046	0.0047	0.0048	0.0049	0.0051	0.0052	0.0053	0.0054	0.0056	0.0057	0.0059	0.006	0.0062	0.0063	0.0065	0.0067	0.0069	0.0071	0.0072	0.0074	0.0076	0.0077	0.0078
60 Malaysia	20.7985	23.781	28.3736	33.0981	56.4304	63.2664	76.9649	77.8623	76.3842	70.9207	67.5423	59.6241	60.2762	61.1152	62.0135	61.3192	61.7439	61.9234	63.4516	64.3556	65.37	66.477	67.6465	68.7644	70.0847	71.36	72.8285	74.1862	75.6846	77.2616	78.9135	80.3714	81.9642	83.6248	85.366	87.1321	89.0609	91.0298	93.0222	95.0209	97.042	99.1315	101.261	103.437	105.627	107.861	109.132	110.006	110.852
61 Kazakhstan	1602.89	1777.85	1800.58	2045.07	1854	2032.57	2130.9	2209.09	2195.53	2090.88	1972.39	1892.64	1913.35	1944.44	1977.62	1960.08	1978.28	1988.71	2042.6	2076.72	2114.62	2155.78	2199.24	2241.33	2290.31	2338.17	2392.71	2444.01	2500.33	2559.67	2621.96	2678.3	2739.59	2803.64	2870.92	2939.61	3014.38	3091.16	3169.42	3248.62	3329.32	3413.12	3499.11	3587.54	3677.35	3769.56	3829.26	3875.64	3921.52
0	Dan_baIEA_QU_covid_S3
RERY	Primary energy supply (before trade), PJ, NER x NR
	2005	2006	2007	2008	2009	2010	2011	2012	2013	2014	2015	2016	2017	2018	2019	2020	2021	2022	2023	2024	2025	2026	2027	2028	2029	2030	2031	2032	2033	2034	2035	2036	2037	2038	2039	2040	2041	2042	2043	2044	2045	2046	2047	2048	2049	2050	2051	2052	2053
1 Belgium	2.3944	0.6371	0	0	0	0.3626	0.3173	0.4533	0.476	0.4306	0.34	0.3173	0.3241	0.3359	0.3486	0.3427	0.3501	0.3546	0.3758	0.3899	0.4058	0.4236	0.4427	0.4618	0.4845	0.5074	0.5342	0.5602	0.5897	0.6216	0.6562	0.6887	0.7251	0.7643	0.8069	0.852	0.9026	0.9566	1.0137	1.0737	1.1371	1.2056	1.2786	1.3565	1.4389	1.527	1.5877	1.6372	1.6874
2 Denmark	0	0	0	0	0	0	0	0	0	0	0	0	0.007	0.0071	0.0072	0.0072	0.0072	0.0073	0.0075	0.0076	0.0078	0.0079	0.0081	0.0083	0.0085	0.0086	0.0089	0.0091	0.0093	0.0095	0.0098	0.01	0.0102	0.0105	0.0108	0.011	0.0113	0.0117	0.012	0.0123	0.0126	0.013	0.0133	0.0137	0.0141	0.0144	0.0147	0.0149	0.0151
3 Germany	2363.79	2228.23	2276.17	2095.79	1942.03	1921.99	1955.12	1992.76	1886.35	1847.75	1800.49	1663.2	1682.22	1711.03	1741.79	1725.92	1742.92	1752.8	1802.73	1834.45	1869.72	1908.08	1948.61	1987.94	2033.64	2078.55	2129.71	2177.95	2230.97	2286.89	2345.71	2399.03	2457.11	2517.9	2581.89	2647.36	2718.72	2792.16	2867.19	2943.28	3020.98	3101.82	3184.96	3270.64	3357.88	3447.71	3506.24	3551.88	3597.22
4 Greece	357.469	342.075	351.233	340.364	342.311	306.282	314.215	336.815	281.699	267.292	237.612	166.323	170.16	175.661	181.632	177.688	180.744	182.263	192.493	198.846	206.047	214.085	222.709	231.185	241.345	251.445	263.262	274.5	287.204	300.861	315.56	328.836	343.704	359.553	376.566	394.295	414.088	434.835	456.325	478.397	501.232	525.398	550.568	576.807	603.789	631.881	647.031	656.607	665.803
5 Spain	262.293	253.256	228.451	175.603	159.555	138.013	110.896	103.026	73.8064	68.1698	52.1725	30.8225	31.1618	31.6829	32.2388	31.9635	32.2744	32.4581	33.3557	33.9284	34.5644	35.2551	35.9843	36.6918	37.5123	38.3182	39.2347	40.099	41.0476	42.0469	43.097	44.0498	45.0859	46.1694	47.3086	48.4732	49.7407	51.0439	52.3742	53.7226	55.0984	56.5284	57.9978	59.5108	61.0503	62.6342	63.6758	64.4945	65.3086
6 France	16.042	11.752	10.972	7.202	3.822	6.786	3.874	7.54	8.138	7.8	0	0	0.0022	0.0023	0.0023	0.0023	0.0023	0.0023	0.0024	0.0024	0.0025	0.0025	0.0026	0.0026	0.0027	0.0027	0.0028	0.0029	0.0029	0.003	0.0031	0.0031	0.0032	0.0033	0.0034	0.0035	0.0035	0.0036	0.0037	0.0038	0.0039	0.004	0.0041	0.0042	0.0044	0.0045	0.0045	0.0046	0.0047
7 Ireland	0	0	0	0	0	0	0	0	0	0	0	0	0.0007	0.0007	0.0007	0.0007	0.0007	0.0007	0.0007	0.0007	0.0008	0.0008	0.0008	0.0008	0.0008	0.0008	0.0009	0.0009	0.0009	0.0009	0.001	0.001	0.001	0.001	0.001	0.0011	0.0011	0.0011	0.0012	0.0012	0.0012	0.0013	0.0013	0.0013	0.0014	0.0014	0.0014	0.0014	0.0015
8 Italy	2.5258	0.5583	4.2007	3.1107	1.9142	2.6853	2.446	2.127	1.9408	2.2865	2.1536	0	0.0085	0.0087	0.0088	0.0088	0.0088	0.0089	0.0091	0.0093	0.0095	0.0097	0.0099	0.0101	0.0103	0.0105	0.0108	0.011	0.0113	0.0115	0.0118	0.0121	0.0124	0.0127	0.013	0.0133	0.0137	0.014	0.0144	0.0148	0.0151	0.0155	0.016	0.0164	0.0168	0.0172	0.0175	0.0178	0.018
9 Luxembourg	0	0	0	0	0	0	0	0	0	0	0	0	0	0	0	0	0	0	0	0	0	0	0	0	0	0	0	0	0	0	0	0	0	0	0	0	0	0	0	0	0	0	0	0	0	0	0	0	0
10 Netherlands	0	0	0	0	0	0	0	0	0	0	0	0	0.0494	0.0503	0.0512	0.0508	0.0513	0.0516	0.053	0.054	0.055	0.0561	0.0573	0.0585	0.0598	0.0611	0.0626	0.064	0.0655	0.0671	0.0689	0.0704	0.0721	0.0739	0.0757	0.0776	0.0797	0.0818	0.084	0.0862	0.0885	0.0908	0.0932	0.0957	0.0982	0.1008	0.1026	0.104	0.1054
11 Austria	0	0	0	0	0	0	0	0	0	0	0	0	0	0	0	0	0	0	0	0	0	0	0	0	0	0	0	0	0	0	0	0	0	0	0	0	0	0	0	0	0	0	0	0	0	0	0	0	0
12 Portugal	0	0	0	0	0	0	0	0	0	0	0	0	0	0	0	0	0	0	0	0	0	0	0	0	0	0	0	0	0	0	0	0	0	0	0	0	0	0	0.0001	0.0001	0.0001	0.0001	0.0001	0.0001	0.0001	0.0001	0.0001	0.0001	0.0001
13 Finland	0	0	0	0	0	0	0	0	0	0	0	0	0	0	0	0	0	0	0	0	0	0	0	0	0	0	0	0	0	0	0	0	0	0	0	0	0	0	0	0	0	0	0	0	0	0	0	0	0
14 Sweden	0	0	0	0	0	0	0	0	0	0	0	0	0.0001	0.0001	0.0001	0.0001	0.0001	0.0001	0.0001	0.0001	0.0001	0.0001	0.0001	0.0001	0.0001	0.0001	0.0001	0.0001	0.0001	0.0001	0.0001	0.0001	0.0001	0.0001	0.0001	0.0001	0.0001	0.0001	0.0001	0.0001	0.0001	0.0001	0.0001	0.0002	0.0002	0.0002	0.0002	0.0002	0.0002
15 UK	505.18	453.668	425.083	449.323	438.56	453.869	458.007	420.337	317.05	289.907	214.153	104.725	105.859	107.64	109.539	108.661	109.743	110.4	113.445	115.406	117.58	119.938	122.427	124.845	127.642	130.393	133.516	136.466	139.7	143.106	146.685	149.94	153.477	157.176	161.063	165.038	169.361	173.806	178.345	182.949	187.649	192.534	197.555	202.727	207.992	213.411	217.03	219.911	222.78
16 Czech Republic	986.828	999.037	996.626	953.968	873.085	871.947	879.324	848.802	744.039	710.876	708	674.892	682.219	689.506	697.376	687.431	689.984	689.786	704.449	712.077	720.832	730.506	740.742	750.3	761.9	772.935	785.895	797.51	810.482	824.109	838.366	850.383	863.651	877.444	891.889	906.391	922.364	938.517	954.672	970.648	986.602	1002.99	1019.52	1036.23	1052.82	1069.56	1076.48	1079.29	1081.76
17 Estonia	0	0	0	0	0	0	0	0	0	0	0	0	0	0	0	0	0	0	0	0	0	0	0	0	0	0	0	0	0	0	0	0	0	0	0	0	0	0	0	0	0	0	0	0	0	0	0	0	0
18 Cyprus	0	0	0	0	0	0	0	0	0	0	0	0	0	0	0	0	0	0	0	0	0	0	0	0	0	0	0	0	0	0	0	0	0	0	0	0	0	0	0	0	0	0	0	0	0	0	0	0	0
19 Latvia	0	0	0	0	0	0	0	0	0	0	0	0	0	0	0	0	0	0	0	0	0	0	0	0	0	0	0	0	0	0	0	0	0	0	0	0	0	0	0	0	0	0	0	0	0	0	0	0	0
20 Lithuania	0	0	0	0	0	0	0	0	0	0	0	0	0	0	0	0	0	0	0	0	0	0	0	0	0	0	0	0	0	0	0	0	0	0	0	0	0	0	0	0	0	0	0	0	0	0	0	0	0
21 Hungary	73.1914	73.5453	74.2241	70.9062	65.1485	66.7072	68.8915	67.2596	67.4795	66.4845	63.5675	61.2311	61.9388	61.9779	62.0613	60.4544	60.0489	59.3909	60.1027	60.1468	60.2814	60.485	60.7231	60.8851	61.211	61.4689	61.8745	62.144	62.5103	62.9106	63.3415	63.5639	63.8717	64.2024	64.5652	64.9113	65.3535	65.7865	66.1964	66.5698	66.9204	67.284	67.638	67.9869	68.3069	68.6216	68.1876	67.4548	66.7119
22 Malta	0	0	0	0	0	0	0	0	0	0	0	0	0	0	0	0	0	0	0	0	0	0	0	0	0	0	0	0	0	0	0	0	0	0	0	0	0	0	0	0	0	0	0	0	0	0	0	0	0
23 Poland	2882.9	2828.52	2616.28	2550.2	2362.09	2318.7	2332.85	2420.78	2392.16	2262.29	2255.29	2190.03	2213.77	2249.1	2286.81	2266.41	2286.95	2298.59	2359.96	2398.59	2441.55	2488.22	2537.47	2585.12	2640.5	2694.75	2756.53	2814.57	2878.29	2945.36	3015.78	3079.33	3148.45	3220.65	3296.49	3373.88	3458.09	3544.52	3632.56	3721.59	3812.23	3906.29	4002.75	4101.88	4202.5	4305.8	4372.19	4423.36	4474.07
24 Slovenia	49.5723	50.6419	51.8849	49.607	48.5596	50.0723	50.2627	45.7703	45.0042	34.2502	36.1088	39.4345	39.8803	39.857	39.8603	38.8062	38.5047	38.0459	38.4403	38.4169	38.4485	38.5213	38.6136	38.6571	38.7994	38.8976	39.084	39.1843	39.3409	39.5151	39.7043	39.7643	39.8726	39.9912	40.1252	40.245	40.4175	40.5794	40.7224	40.8386	40.9357	41.0345	41.1214	41.1987	41.2523	41.2955	40.9094	40.3535	39.7918
25 Slovakia	26.6744	23.5199	23.0585	26.1151	27.351	25.6824	25.188	23.7566	24.4641	24.2562	20.7376	18.9133	19.1402	10.204	5.9231	3.6827	2.644	2.0613	1.7862	1.594	1.4782	1.4104	1.3738	1.3549	1.359	1.3727	1.4028	1.4358	1.4819	1.5369	1.6014	1.6616	1.734	1.8145	1.9044	2.0016	2.1131	2.2337	2.3625	2.4989	2.6444	2.8027	2.9724	3.1548	3.3486	3.5569	3.6964	3.8078	3.9213
26 Bulgaria	174.922	180.342	201.436	203.441	192.529	206.819	259.975	234.911	200.444	214.349	244.994	213.593	215.917	218.821	221.933	219.372	220.797	221.347	226.69	229.802	233.303	237.13	241.172	245.025	249.579	253.986	259.066	263.745	268.916	274.351	280.047	285.046	290.512	296.208	302.18	308.231	314.844	321.586	328.4	335.225	342.116	349.233	356.478	363.872	371.304	378.878	383.069	385.847	388.537
27 Romania	242.556	271.213	287.137	291.449	274.796	247.142	278.92	265.682	194.955	186.257	197.245	177.268	179.219	180.944	182.818	179.954	180.414	180.144	183.808	185.599	187.682	190.001	192.46	194.732	197.534	200.179	203.32	206.098	209.222	212.507	215.947	218.786	221.944	225.227	228.669	232.114	235.93	239.78	243.617	247.393	251.149	255.004	258.881	262.794	266.658	270.549	271.873	272.123	272.286
28 Norway	41.3351	67.2995	114.451	96.383	74.2121	54.3735	38.9466	34.5349	52.1255	47.0675	31.0786	22.9858	23.2406	23.3159	23.407	22.8888	22.8004	22.6194	22.9337	23.0067	23.1124	23.2431	23.3865	23.5021	23.6774	23.8279	24.0325	24.1872	24.377	24.5791	24.7922	24.9286	25.0956	25.2702	25.4556	25.634	25.8463	26.0538	26.2513	26.4338	26.6057	26.78	26.9481	27.1112	27.2604	27.4039	27.2753	27.036	26.7892
29 Switzerland	0	0	0	0	0	0	0	0	0	0	0	0	0	0	0	0	0	0	0	0	0	0	0	0	0	0	0	0	0	0	0	0	0	0	0	0	0	0	0	0	0	0	0	0	0	0	0	0	0
30 Iceland	0	0	0	0	0	0	0	0	0	0	0	0	0	0	0	0	0	0	0	0	0	0	0	0	0	0	0	0	0	0	0	0	0	0	0	0	0	0	0	0	0	0	0	0	0	0	0	0	0
31 Croatia	0	0	0	0	0	0	0	0	0	0	0	0	0	0	0	0	0	0	0	0	0	0	0	0	0	0	0	0	0	0	0	0	0	0	0	0	0	0	0	0	0	0	0	0	0	0	0	0	0
32 Turkey	442.744	542.11	628.418	685.518	700.789	700.903	695.852	651.228	566.957	578.352	535.846	648.854	656.91	645.296	634.133	604.77	589.092	571.076	567.318	556.522	546.6	537.28	528.188	518.301	509.823	500.612	492.571	483.225	474.589	466.099	457.713	447.617	438.15	428.81	419.661	410.361	401.686	392.905	383.957	374.798	365.554	356.468	347.428	338.484	329.537	320.746	308.421	295.2	282.603
33 Macedonia	0	0	0	0	0	0	0	0	0	0	0	0	0	0	0	0	0	0	0	0	0	0	0	0	0	0	0	0	0	0	0	0	0	0	0	0	0	0	0	0	0	0	0	0	0	0	0	0	0
34 USA	23667.2	24181.5	23801.8	24254.1	22195.7	22267.1	22456.4	20745	19978.8	20307.3	18056.9	14589.5	14748	14995.3	15259	15134.6	15284	15374	15797.7	16069.8	16371.5	16699	17044.6	17380.1	17768.7	18150.6	18584.3	18993.8	19442.9	19915.8	20412.7	20864.4	21355.2	21868.5	22407.9	22959.5	23559.3	24176.1	24805.9	25444.5	26096.2	26773.6	27469.8	28186.7	28916.4	29667.3	30166.6	30562.6	30957
35 Japan	27.1264	29.3437	27.7818	28.0143	26.196	24.8631	25.9558	27.0698	30.5179	32.1598	30.8628	31.4259	31.7678	32.2959	32.8591	32.5852	32.9016	33.0901	33.9975	34.5778	35.2218	35.9208	36.6586	37.3744	38.204	39.0188	39.9448	40.8182	41.7763	42.7853	43.8452	44.8073	45.853	46.9463	48.0952	49.2697	50.5471	51.8602	53.2004	54.5585	55.9441	57.3837	58.8626	60.3852	61.934	63.5272	64.5789	65.4084	66.2335
36 Canada	1446.67	1450.18	1554.77	1411.55	1288.91	1421.22	1413.34	1407.17	1472.57	1453.85	1288.31	1257.04	1270.68	1291.57	1313.85	1302.73	1315.17	1322.49	1358.47	1381.39	1406.84	1434.47	1463.63	1491.9	1524.69	1556.87	1593.45	1627.93	1665.75	1705.57	1747.39	1785.31	1826.52	1869.59	1914.85	1961.09	2011.38	2063.06	2115.78	2169.17	2223.6	2280.14	2338.2	2397.94	2458.68	2521.12	2562.09	2594.23	2626.17
37 Australia	8439.69	8533.05	9000.75	9039.73	9350.5	10323.1	9782.07	10272.4	11074.8	11950.8	12501	12226.8	12359.5	12562	12778.1	12669.2	12789.4	12859.9	13209.1	13431.2	13677.9	13945.8	14228.4	14502.5	14820.3	15132.1	15486.8	15820.9	16187.4	16573.3	16978.6	17345.8	17745	18162.2	18600.5	19048.3	19535.4	20035.8	20546.2	21062.9	21589.8	22136.9	22698.7	23276.6	23864	24467.8	24863	25172.4	25479.7
38 New Zealand	132.462	142.527	118.567	118.784	111.111	131.361	121.159	120.698	114.687	97.9343	81.024	68.3284	69.085	70.1936	71.3776	70.7091	71.3456	71.698	73.6354	74.8476	76.1975	77.6659	79.2164	80.7153	82.461	84.1706	86.1208	87.951	89.9631	92.0823	94.3085	96.3144	98.4988	100.782	103.182	105.631	108.3	111.04	113.832	116.656	119.531	122.517	125.58	128.73	131.927	135.212	137.3	138.894	140.473
39 Russian Federation	6574.68	6657.81	6809.95	6991.92	6423.52	6954.53	6875.74	7738.53	7700.05	7932.73	8375.27	8745.14	8840.07	8987.58	9144.87	9069.72	9158.52	9211.79	9464.78	9626.97	9806.87	10002.1	10208.2	10408.2	10639.9	10867.5	11126.1	11370.1	11637.8	11919.6	12215.7	12484.7	12777	13082.6	13403.8	13732.2	14089.3	14456.4	14831.2	15211.1	15598.7	16001.6	16415.5	16841.7	17275.3	17721.5	18017.2	18251.3	18484.2
40 Rest of Annex I	0	0	0	0	0	0	0	0	0	0	0	0	0	0	0	0	0	0	0	0	0	0	0	0	0	0	0	0	0	0	0	0	0	0	0	0	0	0	0	0	0	0	0	0	0	0	0	0	0
41 China	51373.4	55862.4	60779.1	62263	65631.7	72117.2	78026.3	77583.2	79317.4	79620.1	78826.4	71967.1	72762.7	73587.6	74477.4	73430.4	73742.5	73755.6	75388.5	76257.1	77250.4	78346.1	79505.4	80592.9	81906.4	83160.6	84628.9	85952.6	87428.4	88979.7	90604.1	91984.9	93507.4	95091.5	96751.6	98422.2	100260	102123	103991	105844	107699	109608	111537	113493	115440	117409	118281	118693	119069
42 India	6837.39	7152.76	7584.26	8182.75	8868.59	8912.63	9292.77	9800.64	9933.98	10605.7	11034.7	11223.6	11347.5	11511.1	11686.3	11558.6	11643.9	11682.5	11978.1	12154.8	12352.8	12568.9	12797.1	13015.8	13272.9	13522.8	13809.8	14075.9	14369.6	14678.5	15002.5	15289.5	15603	15930.1	16273.3	16621.9	17002.6	17391.7	17786.2	18182.6	18584.1	18999.6	19423.8	19857.8	20295.6	20743	21003.9	21187.1	21366.1
43 Mexico	296.45	336.364	357.051	318.329	276.83	335.186	434.123	332.631	321.405	324.566	241.761	291.395	294.619	298.559	302.785	299.141	301.026	301.697	309.011	313.228	317.983	323.188	328.688	333.923	340.127	346.125	353.052	359.42	366.467	373.877	381.644	388.44	395.88	403.634	411.767	420.004	429.016	438.203	447.483	456.77	466.143	475.822	485.671	495.719	505.811	516.09	521.651	525.24	528.699
44 Brazil	103.971	95.7789	98.3746	111.406	93.7561	88.1214	89.34	105.389	138.101	128.119	128.386	110.353	111.573	113.383	115.316	114.26	115.31	115.902	119.053	121.034	123.24	125.637	128.168	130.618	133.468	136.261	139.444	142.435	145.722	149.184	152.821	156.104	159.678	163.414	167.34	171.35	175.717	180.203	184.776	189.403	194.117	199.013	204.038	209.207	214.456	219.851	223.312	225.976	228.615
45 Argentina	0.6176	3.483	2.7172	3.977	2.0256	1.6056	2.2232	2.3467	2.0503	1.408	0.8399	0.5681	0.5744	0.5844	0.595	0.5901	0.5962	0.5999	0.6169	0.6279	0.6402	0.6534	0.6674	0.681	0.6968	0.7123	0.73	0.7467	0.765	0.7843	0.8046	0.8231	0.8433	0.8643	0.8865	0.9092	0.934	0.9594	0.9855	1.0119	1.039	1.0672	1.0962	1.1261	1.1566	1.1881	1.2091	1.2259	1.2426
46 Colombia	1607.37	1785.13	1902.31	2000.28	1981.37	2023.36	2335.04	2422.7	2326.69	2410.56	2328.1	2463.19	2493.6	2510.56	2529.44	2474.74	2471.63	2457.17	2502.65	2518.89	2539.11	2562.39	2587.2	2608.59	2637.31	2662.94	2695.26	2721.32	2751.7	2783.55	2816.68	2840.02	2867.03	2894.83	2923.79	2951.59	2983.45	3014.4	3043.72	3070.7	3095.91	3120.92	3144.62	3167.1	3187.18	3205.84	3188.79	3156.99	3123.79
47 Rest of Latin America	232.449	227.587	193.982	165.59	119.622	96.6329	79.2346	55.2204	85.5831	112.849	85.3175	72.6889	73.4852	74.7177	76.0323	75.3966	76.1364	76.5781	78.6956	80.0512	81.5555	83.1888	84.9129	86.5865	88.5257	90.4314	92.5973	94.641	96.8834	99.2454	101.727	103.982	106.432	108.995	111.689	114.444	117.441	120.523	123.67	126.86	130.116	133.5	136.978	140.56	144.206	147.957	150.437	152.396	154.345
48 Korea	52.7828	52.6337	55.5815	53.4052	48.5134	40.1358	40.1358	39.0133	33.8153	32.567	32.8651	32.1571	32.5121	33.0277	33.5783	33.2602	33.5539	33.7143	34.6174	35.1803	35.8073	36.4895	37.2097	37.9053	38.716	39.5093	40.4145	41.2631	42.1961	43.1784	44.21	45.1379	46.1485	47.2044	48.3137	49.4452	50.6779	51.9427	53.2305	54.5317	55.8559	57.23	58.6385	60.0856	61.5533	63.0596	64.0104	64.7315	65.4443
49 Taiwan	0	0	0	0	0	0	0	0	0	0	0	0	0.0014	0.0014	0.0015	0.0015	0.0015	0.0015	0.0015	0.0015	0.0016	0.0016	0.0016	0.0017	0.0017	0.0017	0.0018	0.0018	0.0019	0.0019	0.002	0.002	0.0021	0.0021	0.0022	0.0022	0.0023	0.0023	0.0024	0.0025	0.0025	0.0026	0.0027	0.0027	0.0028	0.0029	0.0029	0.003	0.003
50 Indonesia	4112.72	5655.12	6011.83	5966.3	6983.67	7800.58	9752.54	10373.1	11243.9	11125	10260.5	10419	10533.2	10543.5	10560.6	10305.1	10242.6	10139	10255.7	10264.5	10287.6	10321.2	10359.9	10386	10437.7	10478	10541.3	10582.2	10637.8	10698	10762.3	10792.8	10835.9	10881.7	10931.5	10977.6	11037.6	11094.7	11147	11192.2	11232.4	11272.9	11310.3	11345.1	11373.6	11399.3	11311.8	11178.9	11043.8
51 Rest of ASEAN	1126.09	1202.01	1303.11	1239.68	1367.95	1438.03	1521.08	1396.42	1346.93	1341.52	1320.04	1344.97	1359.76	1026.4	791.114	605.072	484.004	392.733	332.389	281.434	241.811	210.437	185.134	164.143	147.239	132.904	121.167	110.883	102.3	94.9879	88.7281	82.955	78.0863	73.8839	70.2659	67.0857	64.4369	62.1175	60.0736	58.2599	56.6703	55.326	54.179	53.2183	52.4048	51.7548	50.4321	48.9597	47.6472
52 OPEC excl Venezuela	42.3768	45.0558	45.4506	44.0604	32.2368	30.4578	32.556	29.1066	30.7218	29.9166	33.7476	37.3566	37.7652	38.4067	39.0908	38.7739	39.1633	39.3997	40.4975	41.2043	41.9882	42.8389	43.7369	44.6096	45.6197	46.6133	47.7416	48.808	49.9775	51.2097	52.5048	53.6835	54.9647	56.3049	57.7142	59.1562	60.7248	62.3388	63.988	65.6615	67.3708	69.1484	70.9766	72.8609	74.7804	76.7572	78.0773	79.1285	80.1759
53 Rest of world	1578.61	1625.8	1556.65	1663.28	1569.9	1855.88	2066.03	1997.29	2015.54	1958.06	1940.01	2333.66	2359.52	2397.01	2437.06	2413.8	2435.13	2446.75	2512.48	2553.42	2599.04	2648.68	2701.1	2751.72	2810.73	2868.48	2934.39	2996.18	3064.12	3135.67	3210.82	3278.41	3352.03	3428.97	3509.81	3592.27	3682.14	3774.35	3868.25	3963.15	4059.73	4159.96	4262.72	4368.31	4475.42	4585.36	4654.68	4707.19	4759.1
54 Ukraine	1445.62	1473.44	1586.39	1572.17	1458.25	1407.37	1684.65	1678.95	1703.72	1347.22	844.702	838.253	847.515	861.612	876.654	869.008	877.358	882.236	906.587	922.07	939.271	957.959	977.69	996.822	1019.03	1040.83	1065.64	1089.01	1114.68	1141.72	1170.13	1195.87	1223.88	1253.17	1283.96	1315.43	1349.69	1384.91	1420.85	1457.27	1494.41	1533.02	1572.67	1613.5	1655.02	1697.73	1725.64	1747.46	1769.13
55 Saudi Arabia	0	0	0	0	0	0	0	0	0	0	0	0	0	0	0	0	0	0	0	0	0	0	0	0	0	0	0	0	0	0	0	0	0	0	0	0	0	0	0	0	0	0	0	0	0	0	0	0	0
56 Nigeria	0.2064	0.2064	0.5934	0.8256	0.8772	0.9804	0.8256	1.2384	1.1352	1.1868	1.2126	1.1868	1.1998	1.2202	1.242	1.2319	1.2443	1.2519	1.2868	1.3093	1.3342	1.3613	1.3898	1.4176	1.4497	1.4814	1.5172	1.5512	1.5884	1.6276	1.6688	1.7063	1.747	1.7896	1.8345	1.8803	1.9302	1.9815	2.034	2.0872	2.1415	2.198	2.2562	2.316	2.377	2.4399	2.4818	2.5153	2.5486
57 South Africa	5793.07	5787.65	5861.55	5967.8	5899.53	6026.65	5975.54	6113.18	6072.3	6171.87	6051.29	6052.21	6126.91	6176.88	6231.82	6105.54	6106.25	6078.95	6200.06	6249.24	6308.56	6375.8	6447.25	6510.55	6592.55	6667.28	6759.21	6835.99	6924.11	7016.48	7112.67	7184.73	7266.62	7351.08	7439.11	7524.85	7621.6	7716.77	7808.52	7895.04	7977.73	8060.68	8140.98	8218.93	8291.41	8360.96	8338.13	8276.79	8211.58
58 Rest of Africa	101.815	97.0778	91.8953	69.4904	78.1885	80.0298	98.2088	208.911	235.21	330.445	301.441	216.27	218.619	222.26	226.143	224.273	226.461	227.769	234.019	238.021	242.462	247.281	252.367	257.304	263.022	268.641	275.024	281.046	287.652	294.608	301.916	308.552	315.764	323.303	331.227	339.327	348.137	357.193	366.437	375.806	385.365	395.297	405.502	416.008	426.697	437.692	444.968	450.716	456.435
59 Africa OPEC	0	0	0	0	0	0	0	0	0	0	0	0	0.0036	0.0037	0.0038	0.0037	0.0038	0.0038	0.0039	0.004	0.004	0.0041	0.0042	0.0043	0.0044	0.0045	0.0046	0.0047	0.0048	0.0049	0.0051	0.0052	0.0053	0.0054	0.0056	0.0057	0.0059	0.006	0.0062	0.0063	0.0065	0.0067	0.0069	0.0071	0.0072	0.0074	0.0076	0.0077	0.0078
60 Malaysia	20.7985	23.781	28.3736	33.0981	56.4304	63.2664	76.9649	77.8623	76.3842	70.9207	67.5423	59.6241	60.2762	61.1152	62.0135	61.3192	61.7442	61.924	63.452	64.3542	65.3671	66.4734	67.6415	68.7581	70.0741	71.3504	72.8184	74.1755	75.6736	77.2488	78.9001	80.3565	81.9478	83.6068	85.3467	87.1119	89.0399	91.0079	92.9997	94.998	97.0187	99.1074	101.237	103.412	105.603	107.838	109.11	109.98	110.826
61 Kazakhstan	1602.89	1777.85	1800.58	2045.07	1854	2032.57	2130.9	2209.09	2195.53	2090.88	1972.39	1892.64	1913.35	1944.44	1977.62	1960.08	1978.29	1988.73	2042.62	2076.67	2114.53	2155.66	2199.08	2241.12	2289.96	2337.85	2392.37	2443.65	2499.96	2559.25	2621.51	2677.8	2739.03	2803.02	2870.26	2938.92	3013.65	3090.4	3168.64	3247.82	3328.49	3412.26	3498.23	3586.64	3676.45	3768.73	3828.41	3874.67	3920.55
0	Dan_baIEA_SO_covid_S3
RERY	Primary energy supply (before trade), PJ, NER x NR
	2005	2006	2007	2008	2009	2010	2011	2012	2013	2014	2015	2016	2017	2018	2019	2020	2021	2022	2023	2024	2025	2026	2027	2028	2029	2030	2031	2032	2033	2034	2035	2036	2037	2038	2039	2040	2041	2042	2043	2044	2045	2046	2047	2048	2049	2050	2051	2052	2053
1 Belgium	2.3944	0.6371	0	0	0	0.3626	0.3173	0.4533	0.476	0.4306	0.34	0.3173	0.3241	0.3359	0.3486	0.3427	0.3501	0.3546	0.3758	0.3899	0.4058	0.4236	0.4428	0.4619	0.4847	0.5077	0.5345	0.5605	0.5899	0.6219	0.6566	0.6892	0.7256	0.7649	0.8075	0.8526	0.9033	0.9574	1.0145	1.0745	1.1381	1.2066	1.2796	1.3576	1.4401	1.5281	1.5888	1.6385	1.6888
2 Denmark	0	0	0	0	0	0	0	0	0	0	0	0	0.007	0.0071	0.0072	0.0072	0.0072	0.0073	0.0075	0.0076	0.0078	0.0079	0.0081	0.0083	0.0085	0.0086	0.0089	0.0091	0.0093	0.0095	0.0098	0.01	0.0102	0.0105	0.0108	0.011	0.0114	0.0117	0.012	0.0123	0.0126	0.013	0.0133	0.0137	0.0141	0.0144	0.0147	0.0149	0.0151
3 Germany	2363.79	2228.23	2276.17	2095.79	1942.03	1921.99	1955.12	1992.76	1886.35	1847.75	1800.49	1663.2	1682.22	1711.03	1741.79	1725.92	1742.92	1752.8	1802.74	1834.48	1869.79	1908.17	1948.78	1988.16	2034.03	2079	2130.23	2178.42	2231.48	2287.48	2346.34	2399.74	2457.89	2518.78	2582.83	2648.35	2719.77	2793.27	2868.32	2944.42	3022.14	3103.02	3186.18	3271.89	3359.09	3448.85	3507.38	3553.14	3598.56
4 Greece	357.469	342.075	351.233	340.364	342.311	306.282	314.215	336.815	281.699	267.292	237.612	166.323	170.16	175.661	181.632	177.688	180.744	182.263	192.493	198.854	206.058	214.103	222.78	231.242	241.42	251.547	263.401	274.65	287.338	301.014	315.717	329.06	343.948	359.82	376.865	394.589	414.39	435.163	456.672	478.754	501.611	525.792	550.97	577.258	604.218	632.234	647.404	657.028	666.253
5 Spain	262.293	253.256	228.451	175.603	159.555	138.013	110.896	103.026	73.8064	68.1698	52.1725	30.8225	31.1618	31.6829	32.2388	31.9635	32.2743	32.4582	33.3558	33.929	34.5657	35.2568	35.9873	36.6957	37.5191	38.3263	39.2439	40.1075	41.0566	42.0574	43.1081	44.0623	45.0998	46.1849	47.3252	48.4907	49.7592	51.0633	52.394	53.7425	55.1187	56.5494	58.0192	59.5327	61.0714	62.654	63.6957	64.5165	65.332
6 France	16.042	11.752	10.972	7.202	3.822	6.786	3.874	7.54	8.138	7.8	0	0	0.0022	0.0023	0.0023	0.0023	0.0023	0.0023	0.0024	0.0024	0.0025	0.0025	0.0026	0.0026	0.0027	0.0027	0.0028	0.0029	0.0029	0.003	0.0031	0.0031	0.0032	0.0033	0.0034	0.0035	0.0035	0.0036	0.0037	0.0038	0.0039	0.004	0.0041	0.0042	0.0044	0.0045	0.0045	0.0046	0.0047
7 Ireland	0	0	0	0	0	0	0	0	0	0	0	0	0.0007	0.0007	0.0007	0.0007	0.0007	0.0007	0.0007	0.0007	0.0008	0.0008	0.0008	0.0008	0.0008	0.0008	0.0009	0.0009	0.0009	0.0009	0.001	0.001	0.001	0.001	0.001	0.0011	0.0011	0.0011	0.0012	0.0012	0.0012	0.0013	0.0013	0.0013	0.0014	0.0014	0.0014	0.0014	0.0015
8 Italy	2.5258	0.5583	4.2007	3.1107	1.9142	2.6853	2.446	2.127	1.9408	2.2865	2.1536	0	0.0085	0.0087	0.0088	0.0088	0.0088	0.0089	0.0091	0.0093	0.0095	0.0097	0.0099	0.0101	0.0103	0.0105	0.0108	0.011	0.0113	0.0115	0.0118	0.0121	0.0124	0.0127	0.013	0.0133	0.0137	0.014	0.0144	0.0148	0.0152	0.0156	0.016	0.0164	0.0168	0.0172	0.0175	0.0178	0.018
9 Luxembourg	0	0	0	0	0	0	0	0	0	0	0	0	0	0	0	0	0	0	0	0	0	0	0	0	0	0	0	0	0	0	0	0	0	0	0	0	0	0	0	0	0	0	0	0	0	0	0	0	0
10 Netherlands	0	0	0	0	0	0	0	0	0	0	0	0	0.0494	0.0503	0.0512	0.0508	0.0513	0.0516	0.053	0.054	0.055	0.0561	0.0573	0.0585	0.0598	0.0611	0.0626	0.064	0.0655	0.0672	0.0689	0.0704	0.0721	0.0739	0.0757	0.0777	0.0797	0.0818	0.084	0.0862	0.0885	0.0908	0.0932	0.0957	0.0983	0.1009	0.1026	0.104	0.1054
11 Austria	0	0	0	0	0	0	0	0	0	0	0	0	0	0	0	0	0	0	0	0	0	0	0	0	0	0	0	0	0	0	0	0	0	0	0	0	0	0	0	0	0	0	0	0	0	0	0	0	0
12 Portugal	0	0	0	0	0	0	0	0	0	0	0	0	0	0	0	0	0	0	0	0	0	0	0	0	0	0	0	0	0	0	0	0	0	0	0	0	0	0	0.0001	0.0001	0.0001	0.0001	0.0001	0.0001	0.0001	0.0001	0.0001	0.0001	0.0001
13 Finland	0	0	0	0	0	0	0	0	0	0	0	0	0	0	0	0	0	0	0	0	0	0	0	0	0	0	0	0	0	0	0	0	0	0	0	0	0	0	0	0	0	0	0	0	0	0	0	0	0
14 Sweden	0	0	0	0	0	0	0	0	0	0	0	0	0.0001	0.0001	0.0001	0.0001	0.0001	0.0001	0.0001	0.0001	0.0001	0.0001	0.0001	0.0001	0.0001	0.0001	0.0001	0.0001	0.0001	0.0001	0.0001	0.0001	0.0001	0.0001	0.0001	0.0001	0.0001	0.0001	0.0001	0.0001	0.0001	0.0001	0.0001	0.0002	0.0002	0.0002	0.0002	0.0002	0.0002
15 UK	505.18	453.668	425.083	449.323	438.56	453.869	458.007	420.337	317.05	289.907	214.153	104.725	105.859	107.64	109.539	108.661	109.742	110.4	113.445	115.408	117.584	119.944	122.437	124.858	127.665	130.42	133.546	136.494	139.73	143.141	146.722	149.982	153.524	157.228	161.119	165.097	169.423	173.871	178.412	183.016	187.717	192.604	197.627	202.8	208.063	213.478	217.097	219.985	222.859
16 Czech Republic	986.828	999.037	996.626	953.968	873.085	871.947	879.324	848.802	744.039	710.876	708	674.892	682.219	689.506	697.376	687.431	689.982	689.788	704.451	712.088	720.859	730.54	740.802	750.378	762.037	773.094	786.072	797.673	810.652	824.306	838.572	850.612	863.903	877.722	892.183	906.697	922.684	938.847	955.004	970.976	986.929	1003.32	1019.85	1036.57	1053.13	1069.84	1076.76	1079.6	1082.09
17 Estonia	0	0	0	0	0	0	0	0	0	0	0	0	0	0	0	0	0	0	0	0	0	0	0	0	0	0	0	0	0	0	0	0	0	0	0	0	0	0	0	0	0	0	0	0	0	0	0	0	0
18 Cyprus	0	0	0	0	0	0	0	0	0	0	0	0	0	0	0	0	0	0	0	0	0	0	0	0	0	0	0	0	0	0	0	0	0	0	0	0	0	0	0	0	0	0	0	0	0	0	0	0	0
19 Latvia	0	0	0	0	0	0	0	0	0	0	0	0	0	0	0	0	0	0	0	0	0	0	0	0	0	0	0	0	0	0	0	0	0	0	0	0	0	0	0	0	0	0	0	0	0	0	0	0	0
20 Lithuania	0	0	0	0	0	0	0	0	0	0	0	0	0	0	0	0	0	0	0	0	0	0	0	0	0	0	0	0	0	0	0	0	0	0	0	0	0	0	0	0	0	0	0	0	0	0	0	0	0
21 Hungary	73.1914	73.5453	74.2241	70.9062	65.1485	66.7072	68.8915	67.2596	67.4795	66.4845	63.5675	61.2311	61.9388	61.9779	62.0613	60.4544	60.0487	59.391	60.1028	60.1478	60.2838	60.488	60.7285	60.8919	61.2227	61.4822	61.8894	62.1574	62.5239	62.9261	63.3574	63.5816	63.8909	64.2232	64.5869	64.9335	65.3761	65.8095	66.219	66.5917	66.9417	67.3052	67.6589	68.0075	68.3255	68.6372	68.2026	67.4717	66.7295
22 Malta	0	0	0	0	0	0	0	0	0	0	0	0	0	0	0	0	0	0	0	0	0	0	0	0	0	0	0	0	0	0	0	0	0	0	0	0	0	0	0	0	0	0	0	0	0	0	0	0	0
23 Poland	2882.9	2828.52	2616.28	2550.2	2362.09	2318.7	2332.85	2420.78	2392.16	2262.29	2255.29	2190.03	2213.77	2249.1	2286.81	2266.41	2286.95	2298.6	2359.97	2398.63	2441.64	2488.33	2537.68	2585.39	2640.97	2695.31	2757.16	2815.15	2878.91	2946.08	3016.54	3080.18	3149.4	3221.71	3297.62	3375.07	3459.35	3545.84	3633.91	3722.94	3813.6	3907.7	4004.19	4103.34	4203.91	4307.12	4373.52	4424.83	4475.62
24 Slovenia	49.5723	50.6419	51.8849	49.607	48.5596	50.0723	50.2627	45.7703	45.0042	34.2502	36.1088	39.4345	39.8803	39.857	39.8603	38.8062	38.5046	38.046	38.4404	38.4175	38.45	38.5231	38.6169	38.6612	38.8066	38.9058	39.093	39.1923	39.3491	39.5244	39.7138	39.7748	39.884	40.0035	40.1379	40.258	40.4307	40.5927	40.7354	40.851	40.9477	41.0463	41.1329	41.2098	41.2622	41.3037	40.9171	40.3622	39.8008
25 Slovakia	26.6744	23.5199	23.0585	26.1151	27.351	25.6824	25.188	23.7566	24.4641	24.2562	20.7376	18.9133	19.1402	10.204	5.9231	3.6827	2.6439	2.0613	1.7862	1.594	1.4783	1.4107	1.3742	1.3553	1.3594	1.373	1.4036	1.4368	1.4825	1.5376	1.6021	1.6629	1.7352	1.8159	1.906	2.0031	2.1147	2.2355	2.3644	2.5009	2.6467	2.8051	2.975	3.1579	3.3516	3.5594	3.6992	3.8108	3.9248
26 Bulgaria	174.922	180.342	201.436	203.441	192.529	206.819	259.975	234.911	200.444	214.349	244.994	213.593	215.917	218.821	221.933	219.372	220.796	221.348	226.69	229.805	233.311	237.141	241.191	245.05	249.624	254.039	259.125	263.8	268.973	274.418	280.117	285.124	290.599	296.304	302.282	308.338	314.956	321.703	328.518	335.343	342.235	349.354	356.601	363.996	371.422	378.987	383.177	385.967	388.663
27 Romania	242.556	271.213	287.137	291.449	274.796	247.142	278.92	265.682	194.955	186.257	197.245	177.268	179.219	180.944	182.818	179.954	180.414	180.144	183.808	185.602	187.689	190.01	192.476	194.752	197.57	200.22	203.367	206.14	209.266	212.559	216	218.846	222.009	225.299	228.745	232.193	236.013	239.865	243.702	247.476	251.232	255.089	258.966	262.879	266.738	270.62	271.942	272.201	272.367
28 Norway	41.3351	67.2995	114.451	96.383	74.2121	54.3735	38.9466	34.5349	52.1255	47.0675	31.0786	22.9858	23.2406	23.3159	23.407	22.8888	22.8003	22.6194	22.9337	23.007	23.1133	23.2442	23.3884	23.5046	23.6817	23.8329	24.0379	24.1921	24.382	24.5849	24.7981	24.9352	25.1027	25.2779	25.4637	25.6423	25.8548	26.0624	26.2598	26.442	26.6138	26.788	26.9559	27.1189	27.2674	27.4098	27.2809	27.0423	26.7957
29 Switzerland	0	0	0	0	0	0	0	0	0	0	0	0	0	0	0	0	0	0	0	0	0	0	0	0	0	0	0	0	0	0	0	0	0	0	0	0	0	0	0	0	0	0	0	0	0	0	0	0	0
30 Iceland	0	0	0	0	0	0	0	0	0	0	0	0	0	0	0	0	0	0	0	0	0	0	0	0	0	0	0	0	0	0	0	0	0	0	0	0	0	0	0	0	0	0	0	0	0	0	0	0	0
31 Croatia	0	0	0	0	0	0	0	0	0	0	0	0	0	0	0	0	0	0	0	0	0	0	0	0	0	0	0	0	0	0	0	0	0	0	0	0	0	0	0	0	0	0	0	0	0	0	0	0	0
32 Turkey	442.744	542.11	628.418	685.518	700.789	700.903	695.852	651.228	566.957	578.352	535.846	648.854	656.91	645.296	634.133	604.77	589.09	571.078	567.32	556.532	546.624	537.307	528.237	518.359	509.923	500.722	492.687	483.323	474.683	466.204	457.815	447.725	438.262	428.928	419.777	410.472	401.792	393.006	384.048	374.876	365.622	356.53	347.482	338.531	329.568	320.759	308.429	295.215	282.62
33 Macedonia	0	0	0	0	0	0	0	0	0	0	0	0	0	0	0	0	0	0	0	0	0	0	0	0	0	0	0	0	0	0	0	0	0	0	0	0	0	0	0	0	0	0	0	0	0	0	0	0	0
34 USA	23667.2	24181.5	23801.8	24254.1	22195.7	22267.1	22456.4	20745	19978.8	20307.3	18056.9	14589.5	14748	14995.3	15259	15134.6	15283.9	15374.1	15797.8	16070	16372.1	16699.7	17046	17382	17771.9	18154.3	18588.5	18997.8	19447.1	19920.7	20417.9	20870.2	21361.7	21875.7	22415.6	22967.6	23568	24185.2	24815.2	25453.8	26105.7	26783.4	27479.8	28196.9	28926.3	29676.6	30175.9	30573	30967.9
35 Japan	27.1264	29.3437	27.7818	28.0143	26.196	24.8631	25.9558	27.0698	30.5179	32.1598	30.8628	31.4259	31.7678	32.2959	32.8591	32.5852	32.9015	33.0902	33.9976	34.5783	35.2231	35.9224	36.6616	37.3783	38.2109	39.0269	39.9539	40.8267	41.7853	42.7958	43.8563	44.8198	45.867	46.9618	48.1119	49.2872	50.5656	51.8796	53.2202	54.5785	55.9644	57.4047	58.8842	60.4071	61.9552	63.547	64.5989	65.4305	66.2569
36 Canada	1446.67	1450.18	1554.77	1411.55	1288.91	1421.22	1413.34	1407.17	1472.57	1453.85	1288.31	1257.04	1270.68	1291.57	1313.85	1302.73	1315.16	1322.49	1358.47	1381.41	1406.89	1434.54	1463.75	1492.06	1524.96	1557.19	1593.82	1628.27	1666.11	1705.99	1747.84	1785.8	1827.07	1870.2	1915.51	1961.78	2012.12	2063.83	2116.56	2169.96	2224.41	2280.98	2339.05	2398.81	2459.51	2521.9	2562.87	2595.1	2627.09
37 Australia	8439.69	8533.05	9000.75	9039.73	9350.5	10323.1	9782.07	10272.4	11074.8	11950.8	12501	12226.8	12359.5	12562	12778.1	12669.2	12789.4	12859.9	13209.1	13431.4	13678.4	13946.4	14229.6	14504	14822.9	15135.3	15490.3	15824.2	16190.9	16577.4	16982.9	17350.7	17750.4	18168.2	18606.9	19055.1	19542.5	20043.3	20553.8	21070.6	21597.6	22145	22706.9	23284.9	23872.1	24475.4	24870.6	25180.8	25488.7
38 New Zealand	132.462	142.527	118.567	118.784	111.111	131.361	121.159	120.698	114.687	97.9343	81.024	68.3284	69.085	70.1936	71.3776	70.7091	71.3453	71.6982	73.6356	74.8488	76.2004	77.6695	79.223	80.7239	82.4762	84.1884	86.1409	87.9697	89.9829	92.1053	94.3328	96.3418	98.5293	100.816	103.218	105.669	108.34	111.082	113.875	116.699	119.575	122.562	125.627	128.777	131.972	135.254	137.343	138.941	140.523
39 Russian Federation	6574.68	6657.81	6809.95	6991.92	6423.52	6954.53	6875.74	7738.53	7700.05	7932.73	8375.27	8745.14	8840.07	8987.58	9144.87	9069.72	9158.49	9211.82	9464.81	9627.12	9807.25	10002.6	10209	10409.3	10641.8	10869.8	11128.6	11372.5	11640.3	11922.5	12218.8	12488.2	12780.9	13086.9	13408.4	13737	14094.4	14461.8	14836.7	15216.6	15604.4	16007.4	16421.5	16847.8	17281.2	17727	18022.8	18257.4	18490.7
40 Rest of Annex I	0	0	0	0	0	0	0	0	0	0	0	0	0	0	0	0	0	0	0	0	0	0	0	0	0	0	0	0	0	0	0	0	0	0	0	0	0	0	0	0	0	0	0	0	0	0	0	0	0
41 China	51373.4	55862.4	60779.1	62263	65631.7	72117.2	78026.3	77583.2	79317.4	79620.1	78826.4	71967.1	72762.7	73587.6	74477.4	73430.4	73742.2	73755.8	75388.7	76258.3	77253.4	78349.8	79512.1	80601.4	81921.4	83178	84648.4	85970.5	87447.1	89001.4	90626.8	92010.3	93535.3	95122.3	96784.3	98456.3	100296	102160	104028	105880	107736	109645	111575	113531	115475	117442	118313	118728	119106
42 India	6837.39	7152.76	7584.26	8182.75	8868.59	8912.63	9292.77	9800.64	9933.98	10605.7	11034.7	11223.6	11347.5	11511.1	11686.3	11558.6	11643.8	11682.6	11978.1	12154.9	12353.2	12569.5	12798.1	13017.1	13275.3	13525.6	13813	14078.9	14372.7	14682.1	15006.3	15293.8	15607.8	15935.3	16278.9	16627.8	17008.8	17398.2	17792.7	18189.2	18590.8	19006.4	19430.7	19864.8	20302.3	20749.2	21010.1	21194	21373.3
43 Mexico	296.45	336.364	357.051	318.329	276.83	335.186	434.123	332.631	321.405	324.566	241.761	291.395	294.619	298.559	302.785	299.141	301.024	301.698	309.012	313.233	317.995	323.204	328.715	333.958	340.19	346.198	353.134	359.496	366.546	373.969	381.741	388.548	396	403.767	411.909	420.152	429.172	438.365	447.646	456.934	466.307	475.99	485.842	495.891	505.974	516.24	521.8	525.405	528.873
44 Brazil	103.971	95.7789	98.3746	111.406	93.7561	88.1214	89.34	105.389	138.101	128.119	128.386	110.353	111.573	113.383	115.316	114.26	115.31	115.902	119.053	121.036	123.244	125.643	128.179	130.632	133.492	136.289	139.476	142.465	145.754	149.221	152.86	156.148	159.727	163.468	167.399	171.412	175.783	180.271	184.845	189.473	194.188	199.087	204.113	209.283	214.53	219.92	223.381	226.052	228.696
45 Argentina	0.6176	3.483	2.7172	3.977	2.0256	1.6056	2.2232	2.3467	2.0503	1.408	0.8399	0.5681	0.5744	0.5844	0.595	0.5901	0.5962	0.5999	0.6169	0.628	0.6402	0.6534	0.6675	0.6811	0.6969	0.7125	0.7302	0.7468	0.7652	0.7845	0.8048	0.8234	0.8435	0.8646	0.8868	0.9096	0.9343	0.9598	0.9859	1.0123	1.0394	1.0676	1.0966	1.1265	1.157	1.1884	1.2095	1.2263	1.2431
46 Colombia	1607.37	1785.13	1902.31	2000.28	1981.37	2023.36	2335.04	2422.7	2326.69	2410.56	2328.1	2463.19	2493.6	2510.56	2529.44	2474.74	2471.62	2457.18	2502.65	2518.94	2539.22	2562.52	2587.44	2608.89	2637.84	2663.56	2695.93	2721.93	2752.33	2784.28	2817.43	2840.84	2867.93	2895.81	2924.81	2952.64	2984.53	3015.49	3044.79	3071.74	3096.92	3121.92	3145.6	3168.05	3188.03	3206.56	3189.47	3157.74	3124.56
47 Rest of Latin America	232.449	227.587	193.982	165.59	119.622	96.6329	79.2346	55.2204	85.5831	112.849	85.3175	72.6889	73.4852	74.7177	76.0323	75.3966	76.1361	76.5783	78.6958	80.0524	81.5587	83.1927	84.9199	86.5956	88.5419	90.4503	92.6187	94.661	96.9045	99.27	101.754	104.011	106.465	109.031	111.728	114.485	117.485	120.569	123.716	126.907	130.164	133.55	137.029	140.612	144.256	148.004	150.484	152.448	154.4
48 Korea	52.7828	52.6337	55.5815	53.4052	48.5134	40.1358	40.1358	39.0133	33.8153	32.567	32.8651	32.1571	32.5121	33.0277	33.5783	33.2602	33.5537	33.7144	34.6175	35.1808	35.8087	36.4912	37.2128	37.9094	38.7231	39.5176	40.424	41.2718	42.2053	43.1891	44.2213	45.1507	46.1627	47.2201	48.3306	49.4629	50.6967	51.9623	53.2505	54.5518	55.8763	57.251	58.66	60.1073	61.5742	63.0792	64.03	64.7531	65.4672
49 Taiwan	0	0	0	0	0	0	0	0	0	0	0	0	0.0014	0.0014	0.0015	0.0015	0.0015	0.0015	0.0015	0.0015	0.0016	0.0016	0.0016	0.0017	0.0017	0.0018	0.0018	0.0018	0.0019	0.0019	0.002	0.002	0.0021	0.0021	0.0022	0.0022	0.0023	0.0023	0.0024	0.0025	0.0025	0.0026	0.0027	0.0027	0.0028	0.0029	0.0029	0.003	0.003
50 Indonesia	4112.72	5655.12	6011.83	5966.3	6983.67	7800.58	9752.54	10373.1	11243.9	11125	10260.5	10419	10533.2	10543.5	10560.6	10305.1	10242.5	10139	10255.7	10264.7	10288	10321.7	10360.8	10387.1	10439.6	10480.1	10543.6	10584.3	10639.9	10700.5	10764.8	10795.6	10838.9	10885	10934.9	10981.1	11041.1	11098.3	11150.5	11195.5	11235.6	11276.1	11313.5	11348.2	11376.4	11401.6	11313.9	11181.3	11046.3
51 Rest of ASEAN	1126.09	1202.01	1303.11	1239.68	1367.95	1438.03	1521.08	1396.42	1346.93	1341.52	1320.04	1344.97	1359.76	1026.4	791.114	605.072	484.002	392.735	332.39	281.439	241.821	210.447	185.15	164.16	147.266	132.929	121.192	110.901	102.316	95.0042	88.7428	82.9716	78.1032	73.9016	70.2837	67.1024	64.4528	62.1334	60.0883	58.2733	56.6833	55.339	54.1916	53.2315	52.416	51.7622	50.44	48.9703	47.6596
52 OPEC excl Venezuela	42.3768	45.0558	45.4506	44.0604	32.2368	30.4578	32.556	29.1066	30.7218	29.9166	33.7476	37.3566	37.7652	38.4067	39.0908	38.7739	39.1631	39.3998	40.4976	41.2049	41.9898	42.8409	43.7405	44.6143	45.628	46.623	47.7526	48.8182	49.9884	51.2224	52.5182	53.6987	54.9816	56.3237	57.7344	59.1775	60.7473	62.3624	64.0121	65.6858	67.3955	69.174	71.0029	72.8877	74.8064	76.7815	78.1019	79.1556	80.2047
53 Rest of world	1578.61	1625.8	1556.65	1663.28	1569.9	1855.88	2066.03	1997.29	2015.54	1958.06	1940.01	2333.66	2359.52	2397.01	2437.06	2413.8	2435.12	2446.76	2512.49	2553.46	2599.14	2648.81	2701.32	2752.01	2811.25	2869.08	2935.08	2996.82	3064.8	3136.45	3211.64	3279.34	3353.07	3430.11	3511.04	3593.57	3683.51	3775.78	3869.71	3964.61	4061.21	4161.49	4264.29	4369.9	4476.95	4586.79	4656.11	4708.77	4760.77
54 Ukraine	1445.62	1473.44	1586.39	1572.17	1458.25	1407.37	1684.65	1678.95	1703.72	1347.22	844.702	838.253	847.515	861.612	876.654	869.008	877.355	882.238	906.59	922.084	939.307	958.004	977.772	996.928	1019.22	1041.05	1065.89	1089.24	1114.92	1142	1170.43	1196.21	1224.26	1253.59	1284.41	1315.91	1350.19	1385.44	1421.39	1457.81	1494.96	1533.58	1573.25	1614.09	1655.59	1698.26	1726.18	1748.05	1769.77
55 Saudi Arabia	0	0	0	0	0	0	0	0	0	0	0	0	0	0	0	0	0	0	0	0	0	0	0	0	0	0	0	0	0	0	0	0	0	0	0	0	0	0	0	0	0	0	0	0	0	0	0	0	0
56 Nigeria	0.2064	0.2064	0.5934	0.8256	0.8772	0.9804	0.8256	1.2384	1.1352	1.1868	1.2126	1.1868	1.1998	1.2202	1.242	1.2319	1.2443	1.2519	1.2868	1.3093	1.3343	1.3613	1.39	1.4178	1.45	1.4817	1.5176	1.5515	1.5887	1.628	1.6692	1.7067	1.7476	1.7902	1.8351	1.881	1.9309	1.9823	2.0347	2.088	2.1423	2.1988	2.257	2.3169	2.3779	2.4406	2.4826	2.5161	2.5495
57 South Africa	5793.07	5787.65	5861.55	5967.8	5899.53	6026.65	5975.54	6113.18	6072.3	6171.87	6051.29	6052.21	6126.91	6176.88	6231.82	6105.54	6106.23	6078.97	6200.08	6249.35	6308.83	6376.13	6447.85	6511.31	6593.88	6668.82	6760.92	6837.54	6925.71	7018.32	7114.57	7186.84	7268.93	7353.59	7441.75	7527.57	7624.41	7719.62	7811.34	7897.78	7980.41	8063.35	8143.62	8221.5	8293.74	8362.96	8340.03	8278.9	8213.75
58 Rest of Africa	101.815	97.0778	91.8953	69.4904	78.1885	80.0298	98.2088	208.911	235.21	330.445	301.441	216.27	218.619	222.26	226.143	224.273	226.46	227.769	234.02	238.025	242.471	247.292	252.388	257.331	263.07	268.697	275.087	281.105	287.714	294.68	301.992	308.638	315.859	323.41	331.342	339.448	348.265	357.327	366.574	375.944	385.505	395.442	405.65	416.159	426.843	437.829	445.105	450.868	456.597
59 Africa OPEC	0	0	0	0	0	0	0	0	0	0	0	0	0.0036	0.0037	0.0038	0.0037	0.0038	0.0038	0.0039	0.004	0.004	0.0041	0.0042	0.0043	0.0044	0.0045	0.0046	0.0047	0.0048	0.0049	0.0051	0.0052	0.0053	0.0054	0.0056	0.0057	0.0059	0.006	0.0062	0.0063	0.0065	0.0067	0.0069	0.0071	0.0072	0.0074	0.0076	0.0077	0.0078
60 Malaysia	20.7985	23.781	28.3736	33.0981	56.4304	63.2664	76.9649	77.8623	76.3842	70.9207	67.5423	59.6241	60.2762	61.1152	62.0135	61.3192	61.7439	61.9241	63.4522	64.3552	65.3696	66.4765	67.6471	68.7653	70.0868	71.3652	72.8351	74.1909	75.6898	77.2677	78.9199	80.3788	81.9724	83.634	85.3758	87.1424	89.0719	91.0413	93.0335	95.0318	97.0527	99.1424	101.272	103.448	105.637	107.87	109.141	110.015	110.863
61 Kazakhstan	1602.89	1777.85	1800.58	2045.07	1854	2032.57	2130.9	2209.09	2195.53	2090.88	1972.39	1892.64	1913.35	1944.44	1977.62	1960.08	1978.28	1988.73	2042.62	2076.7	2114.61	2155.76	2199.26	2241.36	2290.38	2338.34	2392.92	2444.16	2500.5	2559.88	2622.18	2678.55	2739.87	2803.95	2871.26	2939.97	3014.76	3091.56	3169.82	3249.01	3329.7	3413.51	3499.51	3587.94	3677.7	3769.9	3829.59	3875.97	3921.93
0	Dan_ba_covid_S3
RERY	Primary energy supply (before trade), PJ, NER x NR
	2005	2006	2007	2008	2009	2010	2011	2012	2013	2014	2015	2016	2017	2018	2019	2020	2021	2022	2023	2024	2025	2026	2027	2028	2029	2030	2031	2032	2033	2034	2035	2036	2037	2038	2039	2040	2041	2042	2043	2044	2045	2046	2047	2048	2049	2050	2051	2052	2053
1 Belgium	2.3944	0.6371	0	0	0	0.3626	0.3173	0.4533	0.476	0.4306	0.34	0.3173	0.3259	0.2791	0.2833	0.2758	0.2791	0.2792	0.2872	0.28	0.2722	0.2543	0.2342	0.2147	0.1994	0.1872	0.1788	0.1736	0.169	0.1703	0.1684	0.1678	0.1695	0.1668	0.168	0.1683	0.1688	0.1698	0.1713	0.1756	0.1757	0.178	0.1808	0.1859	0.1899	0.1942	0.1975	0.1983	0.1987
2 Denmark	0	0	0	0	0	0	0	0	0	0	0	0	0.007	0.0065	0.0065	0.0064	0.0065	0.0065	0.0066	0.0065	0.0064	0.0062	0.0059	0.0057	0.0055	0.0053	0.0052	0.0051	0.0051	0.0051	0.0051	0.005	0.0051	0.005	0.005	0.0051	0.0051	0.0051	0.0051	0.0052	0.0052	0.0052	0.0052	0.0053	0.0054	0.0054	0.0055	0.0055	0.0055
3 Germany	2363.79	2228.23	2276.17	2095.79	1942.03	1921.99	1955.12	1992.76	1886.35	1847.75	1800.49	1663.2	1686.82	1560.58	1571.39	1549.37	1557.5	1557.05	1577.97	1557.16	1534.36	1482.34	1421.54	1360.04	1309.88	1268.09	1238.34	1219.39	1202.38	1206.19	1198.68	1196.1	1201.69	1191.31	1195.15	1195.73	1196.69	1199.84	1204.4	1218.9	1218.77	1226.27	1235.36	1252.23	1264.95	1278.6	1288.9	1290.94	1291.41
4 Greece	357.469	342.075	351.233	340.364	342.311	306.282	314.215	336.815	281.699	267.292	237.612	166.323	171.13	145.557	147.224	142.733	143.921	143.441	147.055	142.777	138.196	128.533	117.817	107.498	99.4448	93.0036	88.5272	85.707	83.1948	83.6296	82.4901	82.0134	82.6994	81.1626	81.5805	81.5577	81.5756	81.9219	82.4363	84.3604	84.2248	85.1427	86.3008	88.593	90.2861	92.1451	93.5033	93.6538	93.5887
5 Spain	262.293	253.256	228.451	175.603	159.555	138.013	110.896	103.026	73.8064	68.1698	52.1725	30.8225	31.244	28.9946	29.1945	28.8066	28.9584	28.9566	29.3378	28.9713	28.5685	27.6402	26.5517	25.4479	24.5463	23.7945	23.2595	22.9199	22.6149	22.6881	22.5555	22.5125	22.618	22.4331	22.5068	22.5213	22.5425	22.6037	22.6905	22.9582	22.9599	23.1003	23.2696	23.5805	23.816	24.0681	24.2596	24.3013	24.3142
6 France	16.042	11.752	10.972	7.202	3.822	6.786	3.874	7.54	8.138	7.8	0	0	0.0022	0.0021	0.0021	0.0021	0.0021	0.0021	0.0021	0.0021	0.002	0.002	0.0019	0.0018	0.0018	0.0017	0.0017	0.0016	0.0016	0.0016	0.0016	0.0016	0.0016	0.0016	0.0016	0.0016	0.0016	0.0016	0.0016	0.0017	0.0017	0.0017	0.0017	0.0017	0.0017	0.0017	0.0017	0.0018	0.0018
7 Ireland	0	0	0	0	0	0	0	0	0	0	0	0	0.0007	0.0006	0.0006	0.0006	0.0006	0.0006	0.0006	0.0006	0.0006	0.0006	0.0006	0.0006	0.0005	0.0005	0.0005	0.0005	0.0005	0.0005	0.0005	0.0005	0.0005	0.0005	0.0005	0.0005	0.0005	0.0005	0.0005	0.0005	0.0005	0.0005	0.0005	0.0005	0.0005	0.0005	0.0005	0.0005	0.0005
8 Italy	2.5258	0.5583	4.2007	3.1107	1.9142	2.6853	2.446	2.127	1.9408	2.2865	2.1536	0	0.0085	0.0079	0.008	0.0079	0.0079	0.0079	0.0081	0.008	0.0079	0.0076	0.0073	0.007	0.0068	0.0066	0.0064	0.0063	0.0063	0.0063	0.0062	0.0062	0.0063	0.0062	0.0062	0.0062	0.0062	0.0063	0.0063	0.0064	0.0064	0.0064	0.0065	0.0065	0.0066	0.0067	0.0067	0.0068	0.0068
9 Luxembourg	0	0	0	0	0	0	0	0	0	0	0	0	0	0	0	0	0	0	0	0	0	0	0	0	0	0	0	0	0	0	0	0	0	0	0	0	0	0	0	0	0	0	0	0	0	0	0	0	0
10 Netherlands	0	0	0	0	0	0	0	0	0	0	0	0	0.0496	0.046	0.0464	0.0458	0.046	0.046	0.0467	0.0461	0.0455	0.044	0.0423	0.0406	0.0392	0.038	0.0371	0.0366	0.0361	0.0363	0.0361	0.036	0.0362	0.0359	0.036	0.0361	0.0361	0.0362	0.0364	0.0368	0.0368	0.0371	0.0373	0.0379	0.0382	0.0387	0.039	0.0391	0.0391
11 Austria	0	0	0	0	0	0	0	0	0	0	0	0	0	0	0	0	0	0	0	0	0	0	0	0	0	0	0	0	0	0	0	0	0	0	0	0	0	0	0	0	0	0	0	0	0	0	0	0	0
12 Portugal	0	0	0	0	0	0	0	0	0	0	0	0	0	0	0	0	0	0	0	0	0	0	0	0	0	0	0	0	0	0	0	0	0	0	0	0	0	0	0	0	0	0	0	0	0	0	0	0	0
13 Finland	0	0	0	0	0	0	0	0	0	0	0	0	0	0	0	0	0	0	0	0	0	0	0	0	0	0	0	0	0	0	0	0	0	0	0	0	0	0	0	0	0	0	0	0	0	0	0	0	0
14 Sweden	0	0	0	0	0	0	0	0	0	0	0	0	0.0001	0.0001	0.0001	0.0001	0.0001	0.0001	0.0001	0.0001	0.0001	0.0001	0.0001	0.0001	0.0001	0.0001	0.0001	0.0001	0.0001	0.0001	0.0001	0.0001	0.0001	0.0001	0.0001	0.0001	0.0001	0.0001	0.0001	0.0001	0.0001	0.0001	0.0001	0.0001	0.0001	0.0001	0.0001	0.0001	0.0001
15 UK	505.18	453.668	425.083	449.323	438.56	453.869	458.007	420.337	317.05	289.907	214.153	104.725	106.133	98.6474	99.3516	98.0869	98.6303	98.6589	99.9718	98.7779	97.4607	94.3758	90.7472	87.0603	84.0485	81.5379	79.7555	78.631	77.6227	77.8921	77.4657	77.3422	77.7209	77.1171	77.3884	77.4594	77.5533	77.7826	78.0988	79.0286	79.0571	79.5562	80.1534	81.2312	82.0541	82.934	83.6087	83.7753	83.8446
16 Czech Republic	986.828	999.037	996.626	953.968	873.085	871.947	879.324	848.802	744.039	710.876	708	674.892	683.993	631.738	632.625	620.956	620.866	617.51	622.201	611.2	599.58	577.247	551.91	526.581	505.689	488.091	475.084	466.159	458.026	457.539	452.945	450.171	450.351	444.8	444.371	442.779	441.324	440.646	440.458	443.734	441.867	442.654	443.965	447.922	450.398	453.14	454.701	453.442	451.654
17 Estonia	0	0	0	0	0	0	0	0	0	0	0	0	0	0	0	0	0	0	0	0	0	0	0	0	0	0	0	0	0	0	0	0	0	0	0	0	0	0	0	0	0	0	0	0	0	0	0	0	0
18 Cyprus	0	0	0	0	0	0	0	0	0	0	0	0	0	0	0	0	0	0	0	0	0	0	0	0	0	0	0	0	0	0	0	0	0	0	0	0	0	0	0	0	0	0	0	0	0	0	0	0	0
19 Latvia	0	0	0	0	0	0	0	0	0	0	0	0	0	0	0	0	0	0	0	0	0	0	0	0	0	0	0	0	0	0	0	0	0	0	0	0	0	0	0	0	0	0	0	0	0	0	0	0	0
20 Lithuania	0	0	0	0	0	0	0	0	0	0	0	0	0	0	0	0	0	0	0	0	0	0	0	0	0	0	0	0	0	0	0	0	0	0	0	0	0	0	0	0	0	0	0	0	0	0	0	0	0
21 Hungary	73.1914	73.5453	74.2241	70.9062	65.1485	66.7072	68.8915	67.2596	67.4795	66.4845	63.5675	61.2311	62.1104	56.4581	55.982	54.3384	53.8022	52.973	52.8898	51.388	49.8649	47.4329	44.802	42.239	40.1164	38.3202	36.945	35.9344	35.0072	34.7177	34.1	33.6377	33.4172	32.7456	32.4869	32.1402	31.8084	31.5409	31.3136	31.3524	30.9992	30.8502	30.7413	30.8295	30.8047	30.7983	30.7037	30.4036	30.069
22 Malta	0	0	0	0	0	0	0	0	0	0	0	0	0	0	0	0	0	0	0	0	0	0	0	0	0	0	0	0	0	0	0	0	0	0	0	0	0	0	0	0	0	0	0	0	0	0	0	0	0
23 Poland	2882.9	2828.52	2616.28	2550.2	2362.09	2318.7	2332.85	2420.78	2392.16	2262.29	2255.29	2190.03	2219.52	2061	2074.03	2045.91	2055.58	2054.5	2080.17	2053.59	2024.51	1958.75	1881.85	1803.92	1740.15	1686.9	1648.84	1624.46	1602.52	1607.03	1597.16	1593.56	1600.33	1586.83	1591.37	1591.79	1592.67	1596.34	1601.78	1619.81	1619.31	1628.47	1639.61	1660.58	1676.28	1693.12	1705.73	1707.94	1708.15
24 Slovenia	49.5723	50.6419	51.8849	49.607	48.5596	50.0723	50.2627	45.7703	45.0042	34.2502	36.1088	39.4345	39.988	36.3916	36.0522	34.98	34.6049	34.0467	33.9564	32.9785	31.9892	30.4328	28.7538	27.119	25.7619	24.6109	23.7256	23.0703	22.4684	22.2673	21.8607	21.5523	21.3956	20.957	20.7772	20.5426	20.3177	20.1332	19.9741	19.9808	19.7434	19.6334	19.5483	19.5855	19.5524	19.5305	19.4539	19.2505	19.026
25 Slovakia	26.6744	23.5199	23.0585	26.1151	27.351	25.6824	25.188	23.7566	24.4641	24.2562	20.7376	18.9133	19.1988	9.1385	5.5727	3.5786	2.5768	1.9751	1.6421	1.3675	1.1773	1.0051	0.8636	0.7493	0.6646	0.5997	0.5531	0.5205	0.4926	0.4833	0.467	0.4556	0.4514	0.4364	0.4325	0.4269	0.422	0.4195	0.418	0.424	0.4199	0.4213	0.4243	0.4332	0.439	0.446	0.4507	0.4495	0.4476
26 Bulgaria	174.922	180.342	201.436	203.441	192.529	206.819	259.975	234.911	200.444	214.349	244.994	213.593	216.479	200.452	201.245	198.031	198.502	197.926	199.936	196.897	193.636	186.88	179.101	171.273	164.841	159.446	155.521	152.911	150.547	150.687	149.472	148.851	149.205	147.659	147.806	147.567	147.372	147.435	147.661	149.052	148.72	149.281	150.02	151.659	152.804	154.046	154.893	154.785	154.494
27 Romania	242.556	271.213	287.137	291.449	274.796	247.142	278.92	265.682	194.955	186.257	197.245	177.268	179.692	165.585	165.636	162.357	162.154	161.087	162.15	159.066	155.83	149.784	142.971	136.185	130.584	125.862	122.353	119.918	117.696	117.469	116.174	115.355	115.305	113.768	113.562	113.055	112.584	112.316	112.174	112.927	112.351	112.46	112.704	113.628	114.17	114.778	115.081	114.66	114.103
28 Norway	41.3351	67.2995	114.451	96.383	74.2121	54.3735	38.9466	34.5349	52.1255	47.0675	31.0786	22.9858	23.302	21.3282	21.208	20.6625	20.5158	20.2609	20.2766	19.7719	19.2551	18.3978	17.4586	16.5361	15.7706	15.1218	14.6275	14.268	13.9381	13.8493	13.6345	13.4781	13.4133	13.175	13.0942	12.979	12.8689	12.783	12.7122	12.744	12.6238	12.5823	12.5561	12.6062	12.6124	12.6256	12.6042	12.5025	12.3867
29 Switzerland	0	0	0	0	0	0	0	0	0	0	0	0	0	0	0	0	0	0	0	0	0	0	0	0	0	0	0	0	0	0	0	0	0	0	0	0	0	0	0	0	0	0	0	0	0	0	0	0	0
30 Iceland	0	0	0	0	0	0	0	0	0	0	0	0	0	0	0	0	0	0	0	0	0	0	0	0	0	0	0	0	0	0	0	0	0	0	0	0	0	0	0	0	0	0	0	0	0	0	0	0	0
31 Croatia	0	0	0	0	0	0	0	0	0	0	0	0	0	0	0	0	0	0	0	0	0	0	0	0	0	0	0	0	0	0	0	0	0	0	0	0	0	0	0	0	0	0	0	0	0	0	0	0	0
32 Turkey	442.744	542.11	628.418	685.518	700.789	700.903	695.852	651.228	566.957	578.352	535.846	648.854	658.863	583.832	568.877	541.704	527.101	509.771	500.449	477.057	454.274	423.595	392.294	362.887	338.608	318.11	301.992	289.515	278.097	272.33	263.94	257.017	252.186	243.833	238.927	233.415	228.121	223.41	219.078	216.776	211.609	208.013	204.747	202.901	200.254	197.745	194.647	190.207	185.625
33 Macedonia	0	0	0	0	0	0	0	0	0	0	0	0	0	0	0	0	0	0	0	0	0	0	0	0	0	0	0	0	0	0	0	0	0	0	0	0	0	0	0	0	0	0	0	0	0	0	0	0	0
34 USA	23667.2	24181.5	23801.8	24254.1	22195.7	22267.1	22456.4	20745	19978.8	20307.3	18056.9	14589.5	14786.3	13739	13835.9	13657.9	13732.4	13735	13916.9	13748.9	13563.6	13131.8	12624.2	12108.8	11687.7	11336.6	11087.2	10929.5	10788.1	10824.8	10764.5	10746.4	10798.3	10713.3	10750.2	10759.2	10771.4	10802.5	10845.6	10974.2	10977.2	11045.8	11128.1	11277.2	11390.8	11512.3	11605.2	11627.4	11636
35 Japan	27.1264	29.3437	27.7818	28.0143	26.196	24.8631	25.9558	27.0698	30.5179	32.1598	30.8628	31.4259	31.8505	29.5862	29.7906	29.4021	29.558	29.559	29.9463	29.5794	29.1756	28.2408	27.1435	26.0298	25.1197	24.3607	23.8207	23.4784	23.1712	23.2471	23.1144	23.0726	23.1812	22.9956	23.072	23.0884	23.1117	23.1755	23.2653	23.5385	23.542	23.6863	23.8598	24.1769	24.4176	24.6752	24.8713	24.9155	24.9306
36 Canada	1446.67	1450.18	1554.77	1411.55	1288.91	1421.22	1413.34	1407.17	1472.57	1453.85	1288.31	1257.04	1273.98	1183.45	1191.45	1175.79	1181.86	1181.74	1197.03	1182.24	1165.98	1128.56	1084.67	1040.14	1003.73	973.352	951.718	937.969	925.62	928.547	923.161	921.396	925.628	918.132	921.079	921.637	922.467	924.909	928.385	939.166	939.204	944.846	951.649	964.164	973.636	983.776	991.468	993.114	993.603
37 Australia	8439.69	8533.05	9000.75	9039.73	9350.5	10323.1	9782.07	10272.4	11074.8	11950.8	12501	12226.8	12391.6	11510.2	11587.4	11434.5	11492.9	11491.1	11639.3	11494.8	11336.1	10971.6	10544.2	10110.7	9756.2	9460.43	9249.68	9115.62	8995.19	9023.25	8970.52	8952.98	8993.73	8920.49	8948.76	8953.8	8961.48	8984.84	9018.23	9122.6	9122.58	9176.99	9242.69	9363.87	9455.47	9553.56	9627.84	9643.39	9647.71
38 New Zealand	132.462	142.527	118.567	118.784	111.111	131.361	121.159	120.698	114.687	97.9343	81.024	68.3284	69.2681	64.2052	64.6042	63.6953	63.9877	63.9381	64.7385	63.879	62.941	60.8412	58.392	55.9143	53.8882	52.1968	50.9863	50.2083	49.508	49.6406	49.3206	49.1981	49.4016	48.9676	49.1014	49.1053	49.1239	49.2299	49.3917	49.9492	49.9239	50.202	50.5426	51.1919	51.6756	52.1948	52.5809	52.6397	52.6358
39 Russian Federation	6574.68	6657.81	6809.95	6991.92	6423.52	6954.53	6875.74	7738.53	7700.05	7932.73	8375.27	8745.14	8863.05	8235.07	8292.6	8185.42	8229.5	8230.52	8338.91	8237.69	8126.24	7867.14	7562.77	7253.71	7001.19	6790.61	6640.92	6546.18	6461.17	6482.77	6446.34	6435.17	6465.88	6414.67	6436.42	6441.47	6448.43	6466.67	6492.14	6568.71	6570.18	6610.85	6659.67	6748.5	6816.06	6888.34	6943.52	6956.38	6961.15
40 Rest of Annex I	0	0	0	0	0	0	0	0	0	0	0	0	0	0	0	0	0	0	0	0	0	0	0	0	0	0	0	0	0	0	0	0	0	0	0	0	0	0	0	0	0	0	0	0	0	0	0	0	0
41 China	51373.4	55862.4	60779.1	62263	65631.7	72117.2	78026.3	77583.2	79317.4	79620.1	78826.4	71967.1	72955.3	67316.1	67441.1	66203.8	66222.1	65886	66424	65257	64022.1	61622.1	58895.4	56169.3	53924.1	52035.8	50644.5	49695	48830.8	48795	48313.9	48029.8	48066	47480.3	47450.2	47293.8	47152.2	47095.1	47091	47463.9	47277.7	47380.1	47539.8	47988	48275.3	48592.1	48780.5	48661.4	48484.3
42 India	6837.39	7152.76	7584.26	8182.75	8868.59	8912.63	9292.77	9800.64	9933.98	10605.7	11034.7	11223.6	11377.5	10531.7	10581.5	10417.8	10450.3	10427.1	10542	10387	10220	9865.53	9455.92	9043.19	8704.73	8421.35	8216.31	8081.45	7959.51	7971.56	7911.01	7882.25	7905.71	7827.24	7839.6	7831.19	7825.14	7832.98	7849.65	7929.02	7915.74	7950.53	7995.06	8088.17	8154.84	8226.85	8277.63	8276.73	8265.99
43 Mexico	296.45	336.364	357.051	318.329	276.83	335.186	434.123	332.631	321.405	324.566	241.761	291.395	295.399	273.1	274.122	269.598	270.174	269.304	272.008	267.731	263.153	253.754	242.959	232.113	223.206	215.736	210.295	206.666	203.376	203.524	201.815	200.921	201.364	199.203	199.363	198.994	198.685	198.73	198.999	200.861	200.365	201.09	202.061	204.26	205.784	207.44	208.555	208.361	207.918
44 Brazil	103.971	95.7789	98.3746	111.406	93.7561	88.1214	89.34	105.389	138.101	128.119	128.386	110.353	111.869	103.724	104.386	102.939	103.429	103.368	104.679	103.311	101.814	98.4403	94.4996	90.5105	87.2493	84.5277	82.5828	81.3365	80.2154	80.4418	79.9357	79.749	80.0902	79.3992	79.6274	79.6453	79.687	79.8703	80.1443	81.0594	81.0304	81.4933	82.0576	83.1225	83.9195	84.7744	85.4137	85.5223	85.5294
45 Argentina	0.6176	3.483	2.7172	3.977	2.0256	1.6056	2.2232	2.3467	2.0503	1.408	0.8399	0.5681	0.576	0.5342	0.5381	0.5311	0.5341	0.5342	0.5416	0.5349	0.5276	0.5104	0.4902	0.4698	0.4531	0.4392	0.4293	0.4231	0.4175	0.419	0.4167	0.416	0.4181	0.4147	0.4162	0.4166	0.4171	0.4184	0.4202	0.4253	0.4255	0.4282	0.4315	0.4375	0.442	0.4469	0.4507	0.4516	0.452
46 Colombia	1607.37	1785.13	1902.31	2000.28	1981.37	2023.36	2335.04	2422.7	2326.69	2410.56	2328.1	2463.19	2500.96	2273.11	2265.8	2207.72	2196.85	2172.93	2181.16	2127.07	2071.33	1974.83	1868.59	1764.38	1678.73	1606.75	1552.79	1514.5	1479.54	1472.67	1450.97	1436.02	1431.73	1407	1400.68	1390.25	1380.35	1373.23	1367.84	1374.53	1363.2	1361.14	1360.84	1369.59	1373.1	1377.43	1377.61	1368.12	1356.89
47 Rest of Latin America	232.449	227.587	193.982	165.59	119.622	96.6329	79.2346	55.2204	85.5831	112.849	85.3175	72.6889	73.6779	68.4076	68.8854	67.9829	68.348	68.3523	69.2561	68.4037	67.4658	65.2918	62.7402	60.151	58.036	56.2728	55.0191	54.2248	53.5121	53.6897	53.3827	53.2868	53.5406	53.1103	53.2892	53.3287	53.3841	53.5336	53.7435	54.38	54.3895	54.7262	55.1309	55.8696	56.4308	57.0313	57.489	57.5933	57.63
48 Korea	52.7828	52.6337	55.5815	53.4052	48.5134	40.1358	40.1358	39.0133	33.8153	32.567	32.8651	32.1571	32.5981	30.2181	30.4015	29.9711	30.1045	30.0774	30.4489	30.0419	29.5982	28.6099	27.4578	26.2926	25.3393	24.5432	23.9728	23.6054	23.2745	23.3343	23.1819	23.1221	23.2152	23.0093	23.0697	23.0692	23.0756	23.1229	23.1964	23.4552	23.4409	23.5688	23.7258	24.0274	24.2513	24.4918	24.6699	24.6947	24.6903
49 Taiwan	0	0	0	0	0	0	0	0	0	0	0	0	0.0014	0.0013	0.0013	0.0013	0.0013	0.0013	0.0013	0.0013	0.0013	0.0013	0.0012	0.0012	0.0011	0.0011	0.0011	0.0011	0.001	0.001	0.001	0.001	0.001	0.001	0.001	0.001	0.001	0.001	0.001	0.0011	0.0011	0.0011	0.0011	0.0011	0.0011	0.0011	0.0011	0.0011	0.0011
50 Indonesia	4112.72	5655.12	6011.83	5966.3	6983.67	7800.58	9752.54	10373.1	11243.9	11125	10260.5	10419	10560.9	9651.24	9577.29	9313.29	9228.69	9096.14	9084.59	8841.84	8594.91	8198.45	7767.68	7346.23	6995.88	6698.39	6470.03	6301.82	6147.19	6098.73	5995.36	5917.82	5880.55	5767.79	5723.94	5665.28	5609.04	5563.44	5524.51	5530.01	5469.9	5443.86	5424.43	5437.85	5432.32	5429.75	5412.41	5360.75	5303.26
51 Rest of ASEAN	1126.09	1202.01	1303.11	1239.68	1367.95	1438.03	1521.08	1396.42	1346.93	1341.52	1320.04	1344.97	1363.34	936.913	731.58	569.572	462.335	379.157	320.498	266.357	224.267	187.127	156.975	132.986	114.779	100.549	89.6349	81.1648	73.9606	69.0773	63.9719	59.7249	56.3746	52.4689	49.6864	46.9864	44.5386	42.395	40.4808	39.1142	37.2631	35.8392	34.5691	33.6495	32.637	31.7124	30.7339	29.5649	28.4289
52 OPEC excl Venezuela	42.3768	45.0558	45.4506	44.0604	32.2368	30.4578	32.556	29.1066	30.7218	29.9166	33.7476	37.3566	37.8641	35.1679	35.4211	34.9656	35.1608	35.1708	35.643	35.2129	34.7386	33.6284	32.3233	30.9981	29.916	29.0143	28.3744	27.9706	27.6087	27.7051	27.5519	27.5074	27.6431	27.4262	27.5233	27.5486	27.5821	27.6641	27.7773	28.1107	28.1207	28.2996	28.5136	28.9002	29.1954	29.511	29.753	29.8125	29.8372
53 Rest of world	1578.61	1625.8	1556.65	1663.28	1569.9	1855.88	2066.03	1997.29	2015.54	1958.06	1940.01	2333.66	2365.78	2192.34	2205.64	2174.23	2183.88	2181.85	2208.84	2179.14	2146.78	2074.76	1990.86	1906.02	1836.62	1778.66	1737.14	1710.38	1686.29	1690.6	1679.48	1675.09	1681.82	1666.82	1671.17	1671.1	1671.52	1674.93	1680.23	1699.01	1697.93	1707.19	1718.57	1740.45	1756.69	1774.14	1787.04	1788.81	1788.44
54 Ukraine	1445.62	1473.44	1586.39	1572.17	1458.25	1407.37	1684.65	1678.95	1703.72	1347.22	844.702	838.253	849.757	788.247	793.591	782.898	786.931	786.773	797.056	786.952	775.863	750.457	720.703	690.548	665.913	645.37	630.735	621.421	613.055	614.976	611.301	610.064	612.864	607.769	609.704	610.031	610.54	612.135	614.424	621.629	621.604	625.35	629.877	638.248	644.571	651.344	656.468	657.52	657.793
55 Saudi Arabia	0	0	0	0	0	0	0	0	0	0	0	0	0	0	0	0	0	0	0	0	0	0	0	0	0	0	0	0	0	0	0	0	0	0	0	0	0	0	0	0	0	0	0	0	0	0	0	0	0
56 Nigeria	0.2064	0.2064	0.5934	0.8256	0.8772	0.9804	0.8256	1.2384	1.1352	1.1868	1.2126	1.1868	1.2029	1.1173	1.1253	1.1109	1.1171	1.1174	1.1325	1.1188	1.1037	1.0685	1.027	0.9849	0.9505	0.9218	0.9015	0.8887	0.8772	0.8803	0.8754	0.874	0.8783	0.8714	0.8745	0.8754	0.8764	0.8791	0.8827	0.8933	0.8936	0.8993	0.9061	0.9184	0.9278	0.9379	0.9456	0.9475	0.9483
57 South Africa	5793.07	5787.65	5861.55	5967.8	5899.53	6026.65	5975.54	6113.18	6072.3	6171.87	6051.29	6052.21	6145.01	5592.71	5581.64	5445.37	5425.21	5372.76	5399.74	5272.42	5140.59	4907.07	4648.53	4394.24	4185.4	4010.07	3879.25	3787.25	3703.34	3689.56	3638.61	3604.42	3596.97	3538.13	3525.43	3502.39	3480.64	3465.86	3455.41	3475.47	3450.05	3448	3450.45	3475.87	3488.08	3502.4	3506.23	3485.49	3460.25
58 Rest of Africa	101.815	97.0778	91.8953	69.4904	78.1885	80.0298	98.2088	208.911	235.21	330.445	301.441	216.27	219.188	203.637	205.052	202.391	203.474	203.491	206.164	203.651	200.885	194.467	186.93	179.278	173.026	167.811	164.104	161.755	159.648	160.176	159.27	158.989	159.743	158.471	159.004	159.124	159.29	159.736	160.36	162.248	162.279	163.279	164.48	166.67	168.334	170.115	171.473	171.785	171.896
59 Africa OPEC	0	0	0	0	0	0	0	0	0	0	0	0	0.0036	0.0034	0.0034	0.0034	0.0034	0.0034	0.0034	0.0034	0.0033	0.0032	0.0031	0.003	0.0029	0.0028	0.0027	0.0027	0.0026	0.0027	0.0026	0.0026	0.0026	0.0026	0.0026	0.0026	0.0026	0.0026	0.0027	0.0027	0.0027	0.0027	0.0027	0.0028	0.0028	0.0028	0.0029	0.0029	0.0029
60 Malaysia	20.7985	23.781	28.3736	33.0981	56.4304	63.2664	76.9649	77.8623	76.3842	70.9207	67.5423	59.6241	60.4341	55.9601	56.2033	55.3219	55.4743	55.3331	55.9182	55.0846	54.1879	52.307	50.1372	47.9519	46.158	44.6545	43.5637	42.8424	42.1895	42.2413	41.9115	41.749	41.8608	41.4374	41.491	41.4356	41.3925	41.4224	41.4985	41.9032	41.8221	41.9928	42.2144	42.6901	43.0269	43.3914	43.6445	43.6272	43.5584
61 Kazakhstan	1602.89	1777.85	1800.58	2045.07	1854	2032.57	2130.9	2209.09	2195.53	2090.88	1972.39	1892.64	1918.37	1780.37	1791.95	1767.66	1776.31	1775.59	1798.21	1775.25	1750.1	1692.96	1626.1	1558.36	1502.96	1456.73	1423.73	1402.65	1383.69	1387.76	1379.3	1376.3	1382.34	1370.71	1374.81	1375.31	1376.22	1379.56	1384.44	1400.3	1400.01	1408.14	1418	1436.44	1450.3	1465.15	1476.32	1478.4	1478.74
0	Dan_ba_QU_covid_S3
RERY	Primary energy supply (before trade), PJ, NER x NR
	2005	2006	2007	2008	2009	2010	2011	2012	2013	2014	2015	2016	2017	2018	2019	2020	2021	2022	2023	2024	2025	2026	2027	2028	2029	2030	2031	2032	2033	2034	2035	2036	2037	2038	2039	2040	2041	2042	2043	2044	2045	2046	2047	2048	2049	2050	2051	2052	2053
1 Belgium	2.3944	0.6371	0	0	0	0.3626	0.3173	0.4533	0.476	0.4306	0.34	0.3173	0.3259	0.2791	0.2833	0.2758	0.2791	0.2793	0.2874	0.2803	0.2725	0.2546	0.2345	0.215	0.1997	0.1875	0.1791	0.1739	0.1692	0.1706	0.167	0.1746	0.1696	0.1705	0.1709	0.1695	0.1696	0.1703	0.1717	0.1759	0.176	0.1786	0.1813	0.1864	0.1903	0.1946	0.1979	0.1987	0.1991
2 Denmark	0	0	0	0	0	0	0	0	0	0	0	0	0.007	0.0065	0.0065	0.0064	0.0065	0.0065	0.0066	0.0065	0.0064	0.0062	0.0059	0.0057	0.0055	0.0053	0.0052	0.0051	0.0051	0.0051	0.005	0.0051	0.0051	0.0051	0.0051	0.0051	0.0051	0.0051	0.0051	0.0052	0.0052	0.0052	0.0052	0.0053	0.0054	0.0054	0.0055	0.0055	0.0055
3 Germany	2363.79	2228.23	2276.17	2095.79	1942.03	1921.99	1955.12	1992.76	1886.35	1847.75	1800.49	1663.2	1686.82	1560.58	1571.39	1549.37	1557.62	1557.29	1578.47	1557.91	1535.18	1483.17	1422.39	1360.86	1310.72	1268.94	1239.22	1220.3	1202.9	1207.44	1193.81	1220.43	1202.11	1204.45	1205.38	1199.9	1199.7	1201.59	1205.72	1220.07	1219.83	1228.2	1236.94	1253.77	1266.42	1279.96	1290.21	1292.22	1292.67
4 Greece	357.469	342.075	351.233	340.364	342.311	306.282	314.215	336.815	281.699	267.292	237.612	166.323	171.13	145.557	147.224	142.733	143.93	143.518	147.16	142.91	138.358	128.685	117.93	107.631	99.585	93.1507	88.6745	85.8489	83.295	83.8164	81.8064	85.4225	82.747	82.9628	82.9796	82.1208	81.9901	82.1492	82.5931	84.487	84.3619	85.4092	86.5259	88.7992	90.4708	92.316	93.6682	93.8077	93.7407
5 Spain	262.293	253.256	228.451	175.603	159.555	138.013	110.896	103.026	73.8064	68.1698	52.1725	30.8225	31.244	28.9946	29.1945	28.8066	28.9605	28.9609	29.3468	28.9846	28.5831	27.6552	26.567	25.4627	24.5615	23.8099	23.2754	22.9363	22.6244	22.7107	22.467	22.9546	22.6257	22.6721	22.693	22.5973	22.5976	22.6358	22.7147	22.9798	22.9793	23.1356	23.2987	23.6087	23.8428	24.0931	24.2837	24.3247	24.3375
6 France	16.042	11.752	10.972	7.202	3.822	6.786	3.874	7.54	8.138	7.8	0	0	0.0022	0.0021	0.0021	0.0021	0.0021	0.0021	0.0021	0.0021	0.002	0.002	0.0019	0.0018	0.0018	0.0017	0.0017	0.0016	0.0016	0.0016	0.0016	0.0016	0.0016	0.0016	0.0016	0.0016	0.0016	0.0016	0.0016	0.0017	0.0017	0.0017	0.0017	0.0017	0.0017	0.0017	0.0018	0.0018	0.0018
7 Ireland	0	0	0	0	0	0	0	0	0	0	0	0	0.0007	0.0006	0.0006	0.0006	0.0006	0.0006	0.0006	0.0006	0.0006	0.0006	0.0006	0.0006	0.0005	0.0005	0.0005	0.0005	0.0005	0.0005	0.0005	0.0005	0.0005	0.0005	0.0005	0.0005	0.0005	0.0005	0.0005	0.0005	0.0005	0.0005	0.0005	0.0005	0.0005	0.0005	0.0005	0.0005	0.0005
8 Italy	2.5258	0.5583	4.2007	3.1107	1.9142	2.6853	2.446	2.127	1.9408	2.2865	2.1536	0	0.0085	0.0079	0.008	0.0079	0.0079	0.0079	0.0081	0.008	0.0079	0.0076	0.0073	0.007	0.0068	0.0066	0.0064	0.0063	0.0063	0.0063	0.0062	0.0064	0.0063	0.0063	0.0063	0.0063	0.0063	0.0063	0.0063	0.0064	0.0064	0.0064	0.0065	0.0066	0.0066	0.0067	0.0067	0.0068	0.0068
9 Luxembourg	0	0	0	0	0	0	0	0	0	0	0	0	0	0	0	0	0	0	0	0	0	0	0	0	0	0	0	0	0	0	0	0	0	0	0	0	0	0	0	0	0	0	0	0	0	0	0	0	0
10 Netherlands	0	0	0	0	0	0	0	0	0	0	0	0	0.0496	0.046	0.0464	0.0458	0.046	0.046	0.0467	0.0461	0.0455	0.0441	0.0423	0.0406	0.0392	0.038	0.0372	0.0366	0.0362	0.0363	0.0359	0.0367	0.0362	0.0363	0.0363	0.0362	0.0362	0.0363	0.0364	0.0368	0.0369	0.0371	0.0374	0.0379	0.0383	0.0387	0.039	0.0391	0.0391
11 Austria	0	0	0	0	0	0	0	0	0	0	0	0	0	0	0	0	0	0	0	0	0	0	0	0	0	0	0	0	0	0	0	0	0	0	0	0	0	0	0	0	0	0	0	0	0	0	0	0	0
12 Portugal	0	0	0	0	0	0	0	0	0	0	0	0	0	0	0	0	0	0	0	0	0	0	0	0	0	0	0	0	0	0	0	0	0	0	0	0	0	0	0	0	0	0	0	0	0	0	0	0	0
13 Finland	0	0	0	0	0	0	0	0	0	0	0	0	0	0	0	0	0	0	0	0	0	0	0	0	0	0	0	0	0	0	0	0	0	0	0	0	0	0	0	0	0	0	0	0	0	0	0	0	0
14 Sweden	0	0	0	0	0	0	0	0	0	0	0	0	0.0001	0.0001	0.0001	0.0001	0.0001	0.0001	0.0001	0.0001	0.0001	0.0001	0.0001	0.0001	0.0001	0.0001	0.0001	0.0001	0.0001	0.0001	0.0001	0.0001	0.0001	0.0001	0.0001	0.0001	0.0001	0.0001	0.0001	0.0001	0.0001	0.0001	0.0001	0.0001	0.0001	0.0001	0.0001	0.0001	0.0001
15 UK	505.18	453.668	425.083	449.323	438.56	453.869	458.007	420.337	317.05	289.907	214.153	104.725	106.133	98.6474	99.3516	98.0869	98.6371	98.6731	100.002	98.8225	97.5097	94.4262	90.7987	87.11	84.0999	81.5899	79.8093	78.6866	77.6547	77.9688	77.1663	78.8379	77.7475	77.9266	78.0195	77.7176	77.7406	77.8923	78.1819	79.1029	79.1241	79.6768	80.2531	81.3282	82.1463	83.02	83.6917	83.8561	83.9249
16 Czech Republic	986.828	999.037	996.626	953.968	873.085	871.947	879.324	848.802	744.039	710.876	708	674.892	683.993	631.738	632.625	620.956	620.909	617.599	622.389	611.476	599.88	577.552	552.219	526.876	505.991	488.395	475.396	466.479	458.203	457.979	451.167	458.935	450.46	449.46	447.959	444.187	442.312	441.182	440.837	444.058	442.147	443.233	444.42	448.356	450.8	453.504	455.044	453.77	451.975
17 Estonia	0	0	0	0	0	0	0	0	0	0	0	0	0	0	0	0	0	0	0	0	0	0	0	0	0	0	0	0	0	0	0	0	0	0	0	0	0	0	0	0	0	0	0	0	0	0	0	0	0
18 Cyprus	0	0	0	0	0	0	0	0	0	0	0	0	0	0	0	0	0	0	0	0	0	0	0	0	0	0	0	0	0	0	0	0	0	0	0	0	0	0	0	0	0	0	0	0	0	0	0	0	0
19 Latvia	0	0	0	0	0	0	0	0	0	0	0	0	0	0	0	0	0	0	0	0	0	0	0	0	0	0	0	0	0	0	0	0	0	0	0	0	0	0	0	0	0	0	0	0	0	0	0	0	0
20 Lithuania	0	0	0	0	0	0	0	0	0	0	0	0	0	0	0	0	0	0	0	0	0	0	0	0	0	0	0	0	0	0	0	0	0	0	0	0	0	0	0	0	0	0	0	0	0	0	0	0	0
21 Hungary	73.1914	73.5453	74.2241	70.9062	65.1485	66.7072	68.8915	67.2596	67.4795	66.4845	63.5675	61.2311	62.1104	56.4581	55.982	54.3384	53.8061	52.9812	52.9067	51.4125	49.8912	47.4591	44.8278	42.2633	40.141	38.3444	36.9696	35.9593	35.0201	34.7517	33.9545	34.3393	33.4202	33.1082	32.7606	32.2401	31.8747	31.5713	31.3315	31.3658	31.0093	30.8825	30.764	30.8502	30.8226	30.813	30.7166	30.4152	30.0799
22 Malta	0	0	0	0	0	0	0	0	0	0	0	0	0	0	0	0	0	0	0	0	0	0	0	0	0	0	0	0	0	0	0	0	0	0	0	0	0	0	0	0	0	0	0	0	0	0	0	0	0
23 Poland	2882.9	2828.52	2616.28	2550.2	2362.09	2318.7	2332.85	2420.78	2392.16	2262.29	2255.29	2190.03	2219.52	2061	2074.03	2045.91	2055.72	2054.79	2080.79	2054.52	2025.52	1959.79	1882.92	1804.95	1741.21	1687.97	1649.95	1625.6	1603.18	1608.61	1590.98	1624.43	1600.85	1603.49	1604.34	1597.06	1596.48	1598.55	1603.44	1621.29	1620.64	1630.89	1641.6	1662.51	1678.11	1694.82	1707.37	1709.53	1709.73
24 Slovenia	49.5723	50.6419	51.8849	49.607	48.5596	50.0723	50.2627	45.7703	45.0042	34.2502	36.1088	39.4345	39.988	36.3916	36.0522	34.98	34.6073	34.0518	33.967	32.9939	32.0056	30.4492	28.77	27.1342	25.7772	24.626	23.7409	23.0858	22.4763	22.2885	21.7695	21.9915	21.3971	21.1834	20.9477	20.6044	20.3584	20.1515	19.9846	19.9885	19.7489	19.6527	19.5616	19.5976	19.5627	19.5388	19.4611	19.2568	19.0319
25 Slovakia	26.6744	23.5199	23.0585	26.1151	27.351	25.6824	25.188	23.7566	24.4641	24.2562	20.7376	18.9133	19.1988	9.1385	5.5727	3.5786	2.577	1.9758	1.6429	1.3683	1.1783	1.0059	0.864	0.7498	0.6653	0.6004	0.5539	0.5212	0.4931	0.4843	0.4633	0.4737	0.4514	0.4455	0.4394	0.4295	0.4239	0.4203	0.4184	0.4243	0.4205	0.4226	0.4254	0.4341	0.4397	0.4467	0.4513	0.4502	0.4482
26 Bulgaria	174.922	180.342	201.436	203.441	192.529	206.819	259.975	234.911	200.444	214.349	244.994	213.593	216.479	200.452	201.245	198.031	198.516	197.955	199.996	196.986	193.734	186.979	179.202	171.37	164.941	159.546	155.624	153.018	150.607	150.834	148.887	151.749	149.248	149.212	149.009	148.048	147.714	147.627	147.802	149.174	148.829	149.49	150.189	151.821	152.956	154.186	155.027	154.913	154.621
27 Romania	242.556	271.213	287.137	291.449	274.796	247.142	278.92	265.682	194.955	186.257	197.245	177.268	179.692	165.585	165.636	162.357	162.166	161.111	162.199	159.139	155.908	149.864	143.052	136.262	130.663	125.941	122.434	120.001	117.742	117.583	115.711	117.631	115.331	114.974	114.488	113.415	112.836	112.45	112.267	113.006	112.418	112.604	112.816	113.735	114.268	114.866	115.164	114.738	114.18
28 Norway	41.3351	67.2995	114.451	96.383	74.2121	54.3735	38.9466	34.5349	52.1255	47.0675	31.0786	22.9858	23.302	21.3282	21.208	20.6625	20.5173	20.2638	20.2828	19.7809	19.2648	18.4075	17.4683	16.5452	15.7799	15.1311	14.6369	14.2776	13.9431	13.8624	13.5791	13.7465	13.4151	13.3148	13.2002	13.0185	12.8955	12.7958	12.7202	12.7503	12.6288	12.5959	12.5659	12.6153	12.6205	12.6324	12.6104	12.5082	12.3921
29 Switzerland	0	0	0	0	0	0	0	0	0	0	0	0	0	0	0	0	0	0	0	0	0	0	0	0	0	0	0	0	0	0	0	0	0	0	0	0	0	0	0	0	0	0	0	0	0	0	0	0	0
30 Iceland	0	0	0	0	0	0	0	0	0	0	0	0	0	0	0	0	0	0	0	0	0	0	0	0	0	0	0	0	0	0	0	0	0	0	0	0	0	0	0	0	0	0	0	0	0	0	0	0	0
31 Croatia	0	0	0	0	0	0	0	0	0	0	0	0	0	0	0	0	0	0	0	0	0	0	0	0	0	0	0	0	0	0	0	0	0	0	0	0	0	0	0	0	0	0	0	0	0	0	0	0	0
32 Turkey	442.744	542.11	628.418	685.518	700.789	700.903	695.852	651.228	566.957	578.352	535.846	648.854	658.863	583.832	568.877	541.704	527.143	509.855	500.618	477.296	454.52	423.833	392.521	363.091	338.808	318.302	302.182	289.702	278.177	272.585	262.705	262.729	252.119	246.628	240.952	234.041	228.471	223.479	219.05	216.712	211.52	208.084	204.745	202.882	200.212	197.679	194.568	190.12	185.535
33 Macedonia	0	0	0	0	0	0	0	0	0	0	0	0	0	0	0	0	0	0	0	0	0	0	0	0	0	0	0	0	0	0	0	0	0	0	0	0	0	0	0	0	0	0	0	0	0	0	0	0	0
34 USA	23667.2	24181.5	23801.8	24254.1	22195.7	22267.1	22456.4	20745	19978.8	20307.3	18056.9	14589.5	14786.3	13739	13835.9	13657.9	13733.4	13737	13921.1	13755.1	13570.5	13138.8	12631.4	12115.7	11694.8	11343.8	11094.7	10937.3	10792.5	10835.4	10722.7	10954.8	10801.9	10826	10838.1	10795.1	10797.5	10817.7	10857.1	10984.5	10986.5	11062.6	11141.9	11290.6	11403.6	11524.2	11616.7	11638.6	11647.1
35 Japan	27.1264	29.3437	27.7818	28.0143	26.196	24.8631	25.9558	27.0698	30.5179	32.1598	30.8628	31.4259	31.8505	29.5862	29.7906	29.4021	29.5601	29.5633	29.9554	29.5928	29.1903	28.256	27.159	26.0447	25.1351	24.3762	23.8368	23.4951	23.1807	23.27	23.0247	23.5207	23.1891	23.2379	23.2608	23.1656	23.1676	23.2081	23.2899	23.5605	23.5618	23.7221	23.8893	24.2056	24.4449	24.7006	24.8958	24.9394	24.9543
36 Canada	1446.67	1450.18	1554.77	1411.55	1288.91	1421.22	1413.34	1407.17	1472.57	1453.85	1288.31	1257.04	1273.98	1183.45	1191.45	1175.79	1181.94	1181.91	1197.39	1182.77	1166.57	1129.17	1085.29	1040.73	1004.34	973.973	952.36	938.631	926	929.461	919.584	939.253	925.938	927.783	928.598	924.705	924.688	926.203	929.361	940.036	939.987	946.267	952.82	965.302	974.716	984.782	992.437	994.057	994.539
37 Australia	8439.69	8533.05	9000.75	9039.73	9350.5	10323.1	9782.07	10272.4	11074.8	11950.8	12501	12226.8	12391.6	11510.2	11587.4	11434.5	11493.7	11492.8	11642.8	11500	11341.8	10977.4	10550.2	10116.4	9762.16	9466.46	9255.92	9122.06	8998.88	9032.14	8935.74	9126.54	8996.74	9014.29	9021.82	8983.6	8983.05	8997.4	9027.7	9131.04	9130.17	9190.78	9254.05	9374.91	9465.95	9563.31	9637.24	9652.54	9656.78
38 New Zealand	132.462	142.527	118.567	118.784	111.111	131.361	121.159	120.698	114.687	97.9343	81.024	68.3284	69.2681	64.2052	64.6042	63.6953	63.9922	63.9475	64.7584	63.9085	62.9733	60.8743	58.4257	55.9467	53.9216	52.2306	51.0212	50.2443	49.5286	49.6903	49.1258	50.1694	49.4179	49.4914	49.5089	49.2707	49.2432	49.2988	49.4434	49.995	49.965	50.2776	50.6046	51.252	51.7325	52.2477	52.6317	52.689	52.6847
39 Russian Federation	6574.68	6657.81	6809.95	6991.92	6423.52	6954.53	6875.74	7738.53	7700.05	7932.73	8375.27	8745.14	8863.05	8235.07	8292.6	8185.42	8230.07	8231.71	8341.42	8241.43	8130.33	7871.35	7567.07	7257.86	7005.47	6794.95	6645.4	6550.81	6463.84	6489.17	6421.36	6559.89	6468.08	6482.13	6489	6462.96	6464.01	6475.77	6499.02	6574.86	6575.72	6620.86	6667.93	6756.52	6823.69	6895.46	6950.37	6963.06	6967.78
40 Rest of Annex I	0	0	0	0	0	0	0	0	0	0	0	0	0	0	0	0	0	0	0	0	0	0	0	0	0	0	0	0	0	0	0	0	0	0	0	0	0	0	0	0	0	0	0	0	0	0	0	0	0
41 China	51373.4	55862.4	60779.1	62263	65631.7	72117.2	78026.3	77583.2	79317.4	79620.1	78826.4	71967.1	72955.3	67316.1	67441.1	66203.8	66226.8	65895.7	66444.4	65287	64054.6	61655.2	58929	56201.3	53957	52068.8	50678.4	49729.8	48850.1	48842.8	48121.2	48980.5	48078.2	47986.4	47840.2	47447.2	47260.2	47153.9	47132.9	47499.9	47308.8	47443.8	47590.1	48036.1	48320	48632.6	48818.7	48697.9	48520.2
42 India	6837.39	7152.76	7584.26	8182.75	8868.59	8912.63	9292.77	9800.64	9933.98	10605.7	11034.7	11223.6	11377.5	10531.7	10581.5	10417.8	10451	10428.6	10545.2	10391.8	10225.2	9870.87	9461.35	9048.39	8710.09	8426.75	8221.88	8087.19	7962.75	7979.45	7879.71	8037.69	7908.11	7910.7	7904.32	7857.19	7843.74	7843.52	7857.42	7935.85	7921.81	7962.03	8004.38	8097.18	8163.31	8234.66	8285.09	8283.95	8273.12
43 Mexico	296.45	336.364	357.051	318.329	276.83	335.186	434.123	332.631	321.405	324.566	241.761	291.395	295.399	273.1	274.122	269.598	270.193	269.343	272.092	267.855	263.287	253.891	243.098	232.247	223.343	215.874	210.437	206.812	203.458	203.726	201.013	204.895	201.422	201.33	201.009	199.65	199.151	198.991	199.189	201.027	200.511	201.374	202.289	204.48	205.99	207.629	208.735	208.534	208.089
44 Brazil	103.971	95.7789	98.3746	111.406	93.7561	88.1214	89.34	105.389	138.101	128.119	128.386	110.353	111.869	103.724	104.386	102.939	103.436	103.383	104.712	103.358	101.867	98.4939	94.5541	90.563	87.3035	84.5825	82.6393	81.3948	80.2488	80.5222	79.6204	81.3214	80.1168	80.2476	80.2877	79.9137	79.8808	79.9826	80.2285	81.1342	81.0976	81.6164	82.1587	83.2206	84.0125	84.8608	85.4969	85.6031	85.6095
45 Argentina	0.6176	3.483	2.7172	3.977	2.0256	1.6056	2.2232	2.3467	2.0503	1.408	0.8399	0.5681	0.576	0.5342	0.5381	0.5311	0.5341	0.5343	0.5417	0.5352	0.5279	0.5107	0.4905	0.47	0.4533	0.4394	0.4296	0.4234	0.4177	0.4194	0.415	0.4242	0.4182	0.4192	0.4197	0.4181	0.4182	0.419	0.4206	0.4257	0.4258	0.4289	0.4321	0.438	0.4426	0.4474	0.4511	0.452	0.4524
46 Colombia	1607.37	1785.13	1902.31	2000.28	1981.37	2023.36	2335.04	2422.7	2326.69	2410.56	2328.1	2463.19	2500.96	2273.11	2265.8	2207.72	2197.03	2173.29	2181.9	2128.15	2072.49	1976	1869.75	1765.47	1679.83	1607.84	1553.9	1515.63	1480.13	1474.21	1444.5	1467.51	1431.97	1423.45	1413.19	1394.94	1383.53	1374.8	1368.85	1375.33	1363.85	1362.8	1362.06	1370.73	1374.12	1378.3	1378.4	1368.85	1357.59
47 Rest of Latin America	232.449	227.587	193.982	165.59	119.622	96.6329	79.2346	55.2204	85.5831	112.849	85.3175	72.6889	73.6779	68.4076	68.8854	67.9829	68.3528	68.3622	69.2772	68.435	67.5	65.327	62.7762	60.1857	58.0718	56.309	55.0565	54.2635	53.5343	53.7431	53.1742	54.3283	53.5588	53.6734	53.7281	53.5079	53.514	53.6094	53.8008	54.4312	54.4356	54.8096	55.1997	55.9365	56.4943	57.0905	57.5461	57.6489	57.6852
48 Korea	52.7828	52.6337	55.5815	53.4052	48.5134	40.1358	40.1358	39.0133	33.8153	32.567	32.8651	32.1571	32.5981	30.2181	30.4015	29.9711	30.1066	30.0818	30.4582	30.0557	29.6134	28.6254	27.4736	26.3078	25.355	24.559	23.9892	23.6223	23.2841	23.3576	23.0905	23.5775	23.2227	23.2548	23.2607	23.1466	23.1314	23.1551	23.2205	23.4765	23.46	23.6041	23.7547	24.0554	24.2779	24.5164	24.6936	24.7177	24.713
49 Taiwan	0	0	0	0	0	0	0	0	0	0	0	0	0.0014	0.0013	0.0013	0.0013	0.0013	0.0013	0.0013	0.0013	0.0013	0.0013	0.0012	0.0012	0.0011	0.0011	0.0011	0.0011	0.001	0.001	0.001	0.0011	0.001	0.001	0.001	0.001	0.001	0.001	0.001	0.0011	0.0011	0.0011	0.0011	0.0011	0.0011	0.0011	0.0011	0.0011	0.0011
50 Indonesia	4112.72	5655.12	6011.83	5966.3	6983.67	7800.58	9752.54	10373.1	11243.9	11125	10260.5	10419	10560.9	9651.24	9577.29	9313.29	9229.34	9097.46	9087.35	8845.85	8599.2	8202.75	7771.96	7350.25	6999.96	6702.42	6474.12	6305.97	6149.34	6104.41	5971.08	6034.97	5881.1	5828.46	5769.76	5682.07	5620.19	5568.61	5527.6	5532.34	5471.64	5449.31	5428.27	5441.35	5435.37	5432.26	5414.6	5362.73	5305.14
51 Rest of ASEAN	1126.09	1202.01	1303.11	1239.68	1367.95	1438.03	1521.08	1396.42	1346.93	1341.52	1320.04	1344.97	1363.34	936.913	731.58	569.572	462.37	379.212	320.594	266.469	224.359	187.198	157.031	133.028	114.815	100.58	89.6631	81.1904	73.9545	69.1201	63.6186	61.1685	56.2975	53.0805	50.0859	47.0515	44.5431	42.3415	40.4118	39.0427	37.1927	35.8056	34.5248	33.6048	32.5911	31.6652	30.6875	29.5203	28.3868
52 OPEC excl Venezuela	42.3768	45.0558	45.4506	44.0604	32.2368	30.4578	32.556	29.1066	30.7218	29.9166	33.7476	37.3566	37.8641	35.1679	35.4211	34.9656	35.1633	35.1759	35.6538	35.229	34.7562	33.6466	32.3419	31.0159	29.9345	29.033	28.3937	27.9906	27.6201	27.7326	27.4445	28.044	27.6526	27.7166	27.7497	27.6412	27.6493	27.7034	27.8071	28.1373	28.1447	28.3429	28.5494	28.935	29.2285	29.5419	29.7827	29.8415	29.866
53 Rest of world	1578.61	1625.8	1556.65	1663.28	1569.9	1855.88	2066.03	1997.29	2015.54	1958.06	1940.01	2333.66	2365.78	2192.34	2205.64	2174.23	2184.04	2182.17	2209.52	2180.15	2147.88	2075.89	1992.01	1907.12	1837.76	1779.82	1738.33	1711.61	1686.99	1692.29	1672.83	1708.2	1682.37	1684.67	1685.05	1676.73	1675.58	1677.27	1681.98	1700.56	1699.32	1709.75	1720.67	1742.49	1758.62	1775.92	1788.76	1790.47	1790.09
54 Ukraine	1445.62	1473.44	1586.39	1572.17	1458.25	1407.37	1684.65	1678.95	1703.72	1347.22	844.702	838.253	849.757	788.247	793.591	782.898	786.987	786.888	797.301	787.314	776.261	750.865	721.119	690.949	666.327	645.788	631.167	621.867	613.311	615.592	608.893	622.086	613.072	614.264	614.763	612.093	612.033	613.003	615.079	622.212	622.129	626.304	630.662	639.012	645.296	652.019	657.118	658.153	658.421
55 Saudi Arabia	0	0	0	0	0	0	0	0	0	0	0	0	0	0	0	0	0	0	0	0	0	0	0	0	0	0	0	0	0	0	0	0	0	0	0	0	0	0	0	0	0	0	0	0	0	0	0	0	0
56 Nigeria	0.2064	0.2064	0.5934	0.8256	0.8772	0.9804	0.8256	1.2384	1.1352	1.1868	1.2126	1.1868	1.2029	1.1173	1.1253	1.1109	1.1172	1.1176	1.1328	1.1193	1.1043	1.069	1.0276	0.9854	0.9511	0.9224	0.9021	0.8893	0.8775	0.8811	0.872	0.8911	0.8786	0.8807	0.8817	0.8783	0.8786	0.8803	0.8836	0.8941	0.8944	0.9007	0.9073	0.9195	0.9289	0.9389	0.9465	0.9484	0.9492
57 South Africa	5793.07	5787.65	5861.55	5967.8	5899.53	6026.65	5975.54	6113.18	6072.3	6171.87	6051.29	6052.21	6145.01	5592.71	5581.64	5445.37	5425.64	5373.64	5401.58	5275.11	5143.48	4909.97	4651.43	4396.96	4188.17	4012.82	3882.04	3790.1	3704.86	3693.46	3622.42	3683.47	3597.65	3579.56	3557.04	3514.37	3488.83	3469.99	3458.13	3477.69	3451.86	3452.41	3453.75	3478.96	3490.87	3504.83	3508.45	3487.56	3462.25
58 Rest of Africa	101.815	97.0778	91.8953	69.4904	78.1885	80.0298	98.2088	208.911	235.21	330.445	301.441	216.27	219.188	203.637	205.052	202.391	203.488	203.52	206.226	203.744	200.987	194.571	187.037	179.381	173.132	167.919	164.214	161.87	159.713	160.334	158.653	162.073	159.797	160.139	160.304	159.655	159.675	159.961	160.53	162.4	162.416	163.526	164.684	166.868	168.522	170.29	171.642	171.949	172.06
59 Africa OPEC	0	0	0	0	0	0	0	0	0	0	0	0	0.0036	0.0034	0.0034	0.0034	0.0034	0.0034	0.0034	0.0034	0.0033	0.0032	0.0031	0.003	0.0029	0.0028	0.0027	0.0027	0.0026	0.0027	0.0026	0.0027	0.0026	0.0027	0.0027	0.0026	0.0026	0.0027	0.0027	0.0027	0.0027	0.0027	0.0027	0.0028	0.0028	0.0028	0.0029	0.0029	0.0029
60 Malaysia	20.7985	23.781	28.3736	33.0981	56.4304	63.2664	76.9649	77.8623	76.3842	70.9207	67.5423	59.6241	60.4341	55.9601	56.2033	55.3219	55.4782	55.3411	55.9352	55.1097	54.2153	52.3351	50.1657	47.9793	46.1862	44.6829	43.5929	42.8725	42.2065	42.2827	41.747	42.5655	41.8732	41.8753	41.8304	41.5716	41.4897	41.4772	41.5388	41.9385	41.8533	42.0525	42.2626	42.7366	43.0707	43.4316	43.6829	43.6643	43.595
61 Kazakhstan	1602.89	1777.85	1800.58	2045.07	1854	2032.57	2130.9	2209.09	2195.53	2090.88	1972.39	1892.64	1918.37	1780.37	1791.95	1767.66	1776.44	1775.85	1798.75	1776.06	1750.99	1693.87	1627.03	1559.25	1503.89	1457.67	1424.7	1403.64	1384.26	1389.13	1373.91	1403.19	1382.8	1385.23	1386.11	1379.91	1379.55	1381.49	1385.89	1401.59	1401.17	1410.25	1419.74	1438.13	1451.9	1466.64	1477.75	1479.79	1480.13
0	Dan_ba_SO_covid_S3
RERY	Primary energy supply (before trade), PJ, NER x NR
	2005	2006	2007	2008	2009	2010	2011	2012	2013	2014	2015	2016	2017	2018	2019	2020	2021	2022	2023	2024	2025	2026	2027	2028	2029	2030	2031	2032	2033	2034	2035	2036	2037	2038	2039	2040	2041	2042	2043	2044	2045	2046	2047	2048	2049	2050	2051	2052	2053
1 Belgium	2.3944	0.6371	0	0	0	0.3626	0.3173	0.4533	0.476	0.4306	0.34	0.3173	0.3259	0.2791	0.2833	0.2758	0.2791	0.2792	0.2871	0.2799	0.2721	0.2543	0.2342	0.2147	0.1994	0.1872	0.1788	0.1736	0.169	0.1702	0.1684	0.1685	0.1679	0.1645	0.1702	0.168	0.1704	0.1714	0.1723	0.176	0.1759	0.1783	0.181	0.186	0.19	0.1943	0.1976	0.1984	0.1988
2 Denmark	0	0	0	0	0	0	0	0	0	0	0	0	0.007	0.0065	0.0065	0.0064	0.0065	0.0065	0.0066	0.0065	0.0064	0.0062	0.0059	0.0057	0.0055	0.0053	0.0052	0.0051	0.0051	0.0051	0.0051	0.0051	0.005	0.005	0.0051	0.005	0.0051	0.0051	0.0051	0.0052	0.0052	0.0052	0.0052	0.0053	0.0054	0.0054	0.0055	0.0055	0.0055
3 Germany	2363.79	2228.23	2276.17	2095.79	1942.03	1921.99	1955.12	1992.76	1886.35	1847.75	1800.49	1663.2	1686.82	1560.58	1571.39	1549.37	1557.47	1556.96	1577.77	1556.89	1534.09	1482.09	1421.39	1359.93	1309.8	1268.01	1238.25	1219.29	1202.29	1205.98	1198.97	1198.59	1195.88	1183.15	1202.94	1194.64	1202.37	1205.36	1207.83	1220.54	1219.38	1227.28	1235.71	1252.35	1265.01	1278.69	1289.05	1291.15	1291.62
4 Greece	357.469	342.075	351.233	340.364	342.311	306.282	314.215	336.815	281.699	267.292	237.612	166.323	171.13	145.557	147.224	142.733	143.921	143.44	147.025	142.707	138.159	128.507	117.799	107.476	99.4446	93.0034	88.5197	85.6784	83.1946	83.6114	82.541	82.3678	81.9081	80.0304	82.666	81.4071	82.3648	82.6911	82.9324	84.5793	84.2961	85.2956	86.377	88.6063	90.3126	92.1685	93.5161	93.7119	93.6095
5 Spain	262.293	253.256	228.451	175.603	159.555	138.013	110.896	103.026	73.8064	68.1698	52.1725	30.8225	31.244	28.9946	29.1945	28.8066	28.9578	28.955	29.3342	28.9664	28.5637	27.6357	26.5489	25.4459	24.5448	23.793	23.2578	22.9179	22.6133	22.6843	22.5608	22.5577	22.5123	22.2847	22.6484	22.5014	22.6459	22.7042	22.753	22.988	22.9709	23.1188	23.276	23.5827	23.817	24.0698	24.2625	24.305	24.3181
6 France	16.042	11.752	10.972	7.202	3.822	6.786	3.874	7.54	8.138	7.8	0	0	0.0022	0.0021	0.0021	0.0021	0.0021	0.0021	0.0021	0.0021	0.002	0.002	0.0019	0.0018	0.0018	0.0017	0.0017	0.0016	0.0016	0.0016	0.0016	0.0016	0.0016	0.0016	0.0016	0.0016	0.0016	0.0016	0.0016	0.0017	0.0017	0.0017	0.0017	0.0017	0.0017	0.0017	0.0018	0.0018	0.0018
7 Ireland	0	0	0	0	0	0	0	0	0	0	0	0	0.0007	0.0006	0.0006	0.0006	0.0006	0.0006	0.0006	0.0006	0.0006	0.0006	0.0006	0.0006	0.0005	0.0005	0.0005	0.0005	0.0005	0.0005	0.0005	0.0005	0.0005	0.0005	0.0005	0.0005	0.0005	0.0005	0.0005	0.0005	0.0005	0.0005	0.0005	0.0005	0.0005	0.0005	0.0005	0.0005	0.0005
8 Italy	2.5258	0.5583	4.2007	3.1107	1.9142	2.6853	2.446	2.127	1.9408	2.2865	2.1536	0	0.0085	0.0079	0.008	0.0079	0.0079	0.0079	0.0081	0.008	0.0079	0.0076	0.0073	0.007	0.0068	0.0066	0.0064	0.0063	0.0063	0.0063	0.0062	0.0062	0.0062	0.0062	0.0063	0.0062	0.0063	0.0063	0.0063	0.0064	0.0064	0.0064	0.0065	0.0065	0.0066	0.0067	0.0067	0.0068	0.0068
9 Luxembourg	0	0	0	0	0	0	0	0	0	0	0	0	0	0	0	0	0	0	0	0	0	0	0	0	0	0	0	0	0	0	0	0	0	0	0	0	0	0	0	0	0	0	0	0	0	0	0	0	0
10 Netherlands	0	0	0	0	0	0	0	0	0	0	0	0	0.0496	0.046	0.0464	0.0458	0.046	0.046	0.0467	0.0461	0.0455	0.044	0.0423	0.0406	0.0392	0.038	0.0371	0.0366	0.0361	0.0363	0.0361	0.0361	0.036	0.0357	0.0363	0.036	0.0363	0.0364	0.0365	0.0369	0.0368	0.0371	0.0374	0.0379	0.0382	0.0387	0.039	0.0391	0.0391
11 Austria	0	0	0	0	0	0	0	0	0	0	0	0	0	0	0	0	0	0	0	0	0	0	0	0	0	0	0	0	0	0	0	0	0	0	0	0	0	0	0	0	0	0	0	0	0	0	0	0	0
12 Portugal	0	0	0	0	0	0	0	0	0	0	0	0	0	0	0	0	0	0	0	0	0	0	0	0	0	0	0	0	0	0	0	0	0	0	0	0	0	0	0	0	0	0	0	0	0	0	0	0	0
13 Finland	0	0	0	0	0	0	0	0	0	0	0	0	0	0	0	0	0	0	0	0	0	0	0	0	0	0	0	0	0	0	0	0	0	0	0	0	0	0	0	0	0	0	0	0	0	0	0	0	0
14 Sweden	0	0	0	0	0	0	0	0	0	0	0	0	0.0001	0.0001	0.0001	0.0001	0.0001	0.0001	0.0001	0.0001	0.0001	0.0001	0.0001	0.0001	0.0001	0.0001	0.0001	0.0001	0.0001	0.0001	0.0001	0.0001	0.0001	0.0001	0.0001	0.0001	0.0001	0.0001	0.0001	0.0001	0.0001	0.0001	0.0001	0.0001	0.0001	0.0001	0.0001	0.0001	0.0001
15 UK	505.18	453.668	425.083	449.323	438.56	453.869	458.007	420.337	317.05	289.907	214.153	104.725	106.133	98.6474	99.3516	98.0869	98.6282	98.6535	99.9598	98.7615	97.4445	94.3609	90.7378	87.0536	84.0436	81.5328	79.7498	78.6243	77.6172	77.8791	77.4835	77.4949	77.3634	76.6143	77.8676	77.3918	77.9033	78.1229	78.3108	79.1299	79.0947	79.6189	80.1754	81.2391	82.058	82.9399	83.6187	83.7883	83.8579
16 Czech Republic	986.828	999.037	996.626	953.968	873.085	871.947	879.324	848.802	744.039	710.876	708	674.892	683.993	631.738	632.625	620.956	620.853	617.476	622.127	611.098	599.481	577.156	551.854	526.542	505.661	488.063	475.052	466.122	457.996	457.465	453.054	451.07	448.262	441.885	447.166	442.398	443.343	442.593	441.657	444.296	442.065	442.99	444.071	447.947	450.401	453.154	454.738	453.495	451.707
17 Estonia	0	0	0	0	0	0	0	0	0	0	0	0	0	0	0	0	0	0	0	0	0	0	0	0	0	0	0	0	0	0	0	0	0	0	0	0	0	0	0	0	0	0	0	0	0	0	0	0	0
18 Cyprus	0	0	0	0	0	0	0	0	0	0	0	0	0	0	0	0	0	0	0	0	0	0	0	0	0	0	0	0	0	0	0	0	0	0	0	0	0	0	0	0	0	0	0	0	0	0	0	0	0
19 Latvia	0	0	0	0	0	0	0	0	0	0	0	0	0	0	0	0	0	0	0	0	0	0	0	0	0	0	0	0	0	0	0	0	0	0	0	0	0	0	0	0	0	0	0	0	0	0	0	0	0
20 Lithuania	0	0	0	0	0	0	0	0	0	0	0	0	0	0	0	0	0	0	0	0	0	0	0	0	0	0	0	0	0	0	0	0	0	0	0	0	0	0	0	0	0	0	0	0	0	0	0	0	0
21 Hungary	73.1914	73.5453	74.2241	70.9062	65.1485	66.7072	68.8915	67.2596	67.4795	66.4845	63.5675	61.2311	62.1104	56.4581	55.982	54.3384	53.801	52.9699	52.8831	51.3789	49.8564	47.4253	44.7975	42.236	40.1145	38.3182	36.9427	35.9316	35.0052	34.7121	34.1092	33.7101	33.251	32.5163	32.7089	32.1114	31.9662	31.691	31.4047	31.3937	31.0125	30.8738	30.7474	30.8294	30.8031	30.7975	30.7044	30.4056	30.0708
22 Malta	0	0	0	0	0	0	0	0	0	0	0	0	0	0	0	0	0	0	0	0	0	0	0	0	0	0	0	0	0	0	0	0	0	0	0	0	0	0	0	0	0	0	0	0	0	0	0	0	0
23 Poland	2882.9	2828.52	2616.28	2550.2	2362.09	2318.7	2332.85	2420.78	2392.16	2262.29	2255.29	2190.03	2219.52	2061	2074.03	2045.91	2055.54	2054.38	2079.92	2053.25	2024.17	1958.44	1881.66	1803.78	1740.05	1686.8	1648.72	1624.32	1602.41	1606.77	1597.54	1596.72	1592.95	1576.47	1601.26	1590.4	1599.88	1603.34	1606.13	1621.89	1620.08	1629.74	1640.05	1660.73	1676.35	1693.24	1705.93	1708.19	1708.41
24 Slovenia	49.5723	50.6419	51.8849	49.607	48.5596	50.0723	50.2627	45.7703	45.0042	34.2502	36.1088	39.4345	39.988	36.3916	36.0522	34.98	34.6041	34.0447	33.9522	32.9729	31.9838	30.4281	28.751	27.1171	25.7607	24.6096	23.7241	23.0686	22.4671	22.2638	21.8665	21.5976	21.2915	20.8135	20.9161	20.5247	20.4163	20.2269	20.0307	20.0064	19.7516	19.6479	19.552	19.5853	19.5512	19.5298	19.4542	19.2515	19.027
25 Slovakia	26.6744	23.5199	23.0585	26.1151	27.351	25.6824	25.188	23.7566	24.4641	24.2562	20.7376	18.9133	19.1988	9.1385	5.5727	3.5786	2.5768	1.975	1.642	1.3669	1.1772	1.0051	0.8637	0.749	0.6646	0.5998	0.5531	0.5202	0.4926	0.4833	0.4673	0.4575	0.4474	0.4306	0.4382	0.4261	0.4261	0.4233	0.4205	0.4251	0.4202	0.4221	0.4249	0.4331	0.4392	0.4462	0.4506	0.45	0.4478
26 Bulgaria	174.922	180.342	201.436	203.441	192.529	206.819	259.975	234.911	200.444	214.349	244.994	213.593	216.479	200.452	201.245	198.031	198.498	197.915	199.912	196.864	193.604	186.85	179.083	171.26	164.832	159.436	155.51	152.899	150.537	150.662	149.507	149.148	148.513	146.69	148.733	147.439	148.044	148.085	148.064	149.242	148.789	149.396	150.059	151.67	152.808	154.054	154.908	154.805	154.515
27 Romania	242.556	271.213	287.137	291.449	274.796	247.142	278.92	265.682	194.955	186.257	197.245	177.268	179.692	165.585	165.636	162.357	162.151	161.078	162.13	159.039	155.804	149.76	142.957	136.175	130.577	125.855	122.345	119.909	117.689	117.45	116.203	115.589	114.763	113.013	114.287	112.957	113.107	112.819	112.484	113.071	112.401	112.546	112.731	113.634	114.17	114.781	115.09	114.672	114.116
28 Norway	41.3351	67.2995	114.451	96.383	74.2121	54.3735	38.9466	34.5349	52.1255	47.0675	31.0786	22.9858	23.302	21.3282	21.208	20.6625	20.5154	20.2597	20.2741	19.7686	19.2519	18.3949	17.4569	16.5349	15.7698	15.121	14.6266	14.267	13.9373	13.8471	13.638	13.5057	13.3496	13.0868	13.1793	12.9678	12.9296	12.841	12.7475	12.7602	12.6291	12.5916	12.5586	12.6063	12.6119	12.6254	12.6047	12.5034	12.3876
29 Switzerland	0	0	0	0	0	0	0	0	0	0	0	0	0	0	0	0	0	0	0	0	0	0	0	0	0	0	0	0	0	0	0	0	0	0	0	0	0	0	0	0	0	0	0	0	0	0	0	0	0
30 Iceland	0	0	0	0	0	0	0	0	0	0	0	0	0	0	0	0	0	0	0	0	0	0	0	0	0	0	0	0	0	0	0	0	0	0	0	0	0	0	0	0	0	0	0	0	0	0	0	0	0
31 Croatia	0	0	0	0	0	0	0	0	0	0	0	0	0	0	0	0	0	0	0	0	0	0	0	0	0	0	0	0	0	0	0	0	0	0	0	0	0	0	0	0	0	0	0	0	0	0	0	0	0
32 Turkey	442.744	542.11	628.418	685.518	700.789	700.903	695.852	651.228	566.957	578.352	535.846	648.854	658.863	583.832	568.877	541.704	527.089	509.74	500.381	476.969	454.193	423.527	392.257	362.865	338.596	318.098	301.978	289.497	278.086	272.289	264.023	257.613	250.843	242.024	240.709	233.208	229.348	224.548	219.746	217.061	211.682	208.158	204.763	202.873	200.214	197.712	194.625	190.194	185.611
33 Macedonia	0	0	0	0	0	0	0	0	0	0	0	0	0	0	0	0	0	0	0	0	0	0	0	0	0	0	0	0	0	0	0	0	0	0	0	0	0	0	0	0	0	0	0	0	0	0	0	0	0
34 USA	23667.2	24181.5	23801.8	24254.1	22195.7	22267.1	22456.4	20745	19978.8	20307.3	18056.9	14589.5	14786.3	13739	13835.9	13657.9	13732.1	13734.3	13915.3	13746.6	13561.4	13129.7	12622.9	12107.8	11687	11335.9	11086.4	10928.6	10787.3	10822.9	10766.9	10767.7	10748.5	10643.2	10817	10749.8	10820.2	10849.9	10875.1	10988.3	10982.5	11054.5	11131.1	11278.2	11391.3	11513.1	11606.6	11629.2	11637.8
35 Japan	27.1264	29.3437	27.7818	28.0143	26.196	24.8631	25.9558	27.0698	30.5179	32.1598	30.8628	31.4259	31.8505	29.5862	29.7906	29.4021	29.5574	29.5574	29.9427	29.5744	29.1707	28.2363	27.1407	26.0278	25.1182	24.3592	23.819	23.4764	23.1695	23.2432	23.1198	23.1184	23.0741	22.845	23.2155	23.0682	23.2165	23.2774	23.3287	23.5688	23.5533	23.705	23.8663	24.1791	24.4187	24.6769	24.8742	24.9193	24.9345
36 Canada	1446.67	1450.18	1554.77	1411.55	1288.91	1421.22	1413.34	1407.17	1472.57	1453.85	1288.31	1257.04	1273.98	1183.45	1191.45	1175.79	1181.83	1181.68	1196.89	1182.04	1165.79	1128.38	1084.56	1040.06	1003.67	973.292	951.65	937.889	925.555	928.392	923.375	923.221	921.361	912.133	926.799	920.833	926.641	928.965	930.91	940.37	939.651	945.589	951.908	964.254	973.679	983.844	991.584	993.266	993.758
37 Australia	8439.69	8533.05	9000.75	9039.73	9350.5	10323.1	9782.07	10272.4	11074.8	11950.8	12501	12226.8	12391.6	11510.2	11587.4	11434.5	11492.6	11490.5	11637.9	11492.8	11334.2	10969.8	10543.1	10109.9	9755.62	9459.85	9249.02	9114.85	8994.56	9021.75	8972.6	8970.71	8952.25	8862.19	9004.36	8945.99	9002.05	9024.25	9042.76	9134.3	9126.91	9184.21	9245.21	9364.75	9455.89	9554.21	9628.97	9644.87	9649.21
38 New Zealand	132.462	142.527	118.567	118.784	111.111	131.361	121.159	120.698	114.687	97.9343	81.024	68.3284	69.2681	64.2052	64.6042	63.6953	63.9863	63.9345	64.7306	63.8682	62.9303	60.8314	58.3859	55.9099	53.885	52.1935	50.9826	50.204	49.5045	49.6322	49.3323	49.2973	49.1696	48.6419	49.4124	49.0618	49.3505	49.4499	49.5285	50.0143	49.9479	50.2421	50.5564	51.1965	51.6777	52.1983	52.587	52.6477	52.6439
39 Russian Federation	6574.68	6657.81	6809.95	6991.92	6423.52	6954.53	6875.74	7738.53	7700.05	7932.73	8375.27	8745.14	8863.05	8235.07	8292.6	8185.42	8229.33	8230.07	8337.9	8236.33	8124.88	7865.89	7561.99	7253.15	7000.78	6790.19	6640.44	6545.62	6460.72	6481.69	6447.83	6447.91	6436.07	6372.76	6476.38	6435.85	6477.6	6495.02	6509.79	6577.15	6573.31	6616.06	6661.5	6749.14	6816.37	6888.83	6944.34	6957.46	6962.25
40 Rest of Annex I	0	0	0	0	0	0	0	0	0	0	0	0	0	0	0	0	0	0	0	0	0	0	0	0	0	0	0	0	0	0	0	0	0	0	0	0	0	0	0	0	0	0	0	0	0	0	0	0	0
41 China	51373.4	55862.4	60779.1	62263	65631.7	72117.2	78026.3	77583.2	79317.4	79620.1	78826.4	71967.1	72955.3	67316.1	67441.1	66203.8	66220.7	65882.3	66415.9	65246	64011.3	61612.3	58889.4	56165	53921.2	52032.8	50641	49691	48827.6	48787	48325.6	48127.2	47839.3	47163.9	47753.5	47252.4	47371.5	47306.6	47221.4	47525.1	47299.3	47416.9	47551.4	47990.9	48275.8	48593.8	48784.6	48667.2	48490.3
42 India	6837.39	7152.76	7584.26	8182.75	8868.59	8912.63	9292.77	9800.64	9933.98	10605.7	11034.7	11223.6	11377.5	10531.7	10581.5	10417.8	10450.1	10426.5	10540.7	10385.3	10218.3	9863.95	9454.93	9042.49	8704.23	8420.83	8215.73	8080.77	7958.96	7970.22	7912.9	7898.15	7868.61	7775.24	7889.31	7824.29	7861.26	7867.97	7871.34	7939.29	7919.48	7956.8	7997.16	8088.82	8155.08	8227.3	8278.49	8277.9	8267.17
43 Mexico	296.45	336.364	357.051	318.329	276.83	335.186	434.123	332.631	321.405	324.566	241.761	291.395	295.399	273.1	274.122	269.598	270.168	269.288	271.975	267.686	263.108	253.713	242.934	232.096	223.193	215.723	210.28	206.649	203.362	203.49	201.863	201.328	200.416	197.876	200.633	198.818	199.606	199.62	199.55	201.121	200.459	201.248	202.113	204.275	205.789	207.45	208.575	208.389	207.947
44 Brazil	103.971	95.7789	98.3746	111.406	93.7561	88.1214	89.34	105.389	138.101	128.119	128.386	110.353	111.869	103.724	104.386	102.939	103.427	103.362	104.666	103.293	101.797	98.4245	94.4897	90.5034	87.2442	84.5225	82.5768	81.3295	80.2098	80.4282	79.9546	79.9096	79.7146	78.8716	80.1308	79.5747	80.054	80.2268	80.3659	81.165	81.0694	81.5582	82.0801	83.1301	83.923	84.7801	85.4236	85.5354	85.5426
45 Argentina	0.6176	3.483	2.7172	3.977	2.0256	1.6056	2.2232	2.3467	2.0503	1.408	0.8399	0.5681	0.576	0.5342	0.5381	0.5311	0.5341	0.5342	0.5415	0.5348	0.5275	0.5103	0.4902	0.4697	0.453	0.4391	0.4293	0.423	0.4175	0.4189	0.4168	0.4168	0.4161	0.412	0.4189	0.4163	0.4191	0.4203	0.4213	0.4259	0.4257	0.4286	0.4316	0.4375	0.4421	0.447	0.4507	0.4517	0.452
46 Colombia	1607.37	1785.13	1902.31	2000.28	1981.37	2023.36	2335.04	2422.7	2326.69	2410.56	2328.1	2463.19	2500.96	2273.11	2265.8	2207.72	2196.8	2172.8	2180.86	2126.68	2070.95	1974.49	1868.38	1764.24	1678.63	1606.65	1552.68	1514.37	1479.44	1472.41	1451.38	1439.25	1424.25	1396.65	1410.67	1388.93	1387.5	1380.07	1372.01	1376.44	1363.84	1362.25	1361.14	1369.62	1373.05	1377.42	1377.67	1368.24	1357.01
47 Rest of Latin America	232.449	227.587	193.982	165.59	119.622	96.6329	79.2346	55.2204	85.5831	112.849	85.3175	72.6889	73.6779	68.4076	68.8854	67.9829	68.3466	68.3485	69.2477	68.3923	67.4544	65.2814	62.7336	60.1463	58.0326	56.2693	55.0151	54.2202	53.5083	53.6807	53.3952	53.3932	53.2917	52.7604	53.6228	53.2817	53.6276	53.7703	53.8909	54.4504	54.4156	54.7697	55.1461	55.8749	56.4333	57.0353	57.4958	57.6022	57.6391
48 Korea	52.7828	52.6337	55.5815	53.4052	48.5134	40.1358	40.1358	39.0133	33.8153	32.567	32.8651	32.1571	32.5981	30.2181	30.4015	29.9711	30.1038	30.0757	30.4452	30.0369	29.5932	28.6053	27.455	26.2905	25.3378	24.5417	23.9711	23.6034	23.2729	23.3304	23.1874	23.1686	23.1064	22.8566	23.2155	23.0488	23.1818	23.226	23.2604	23.4857	23.4521	23.5875	23.7323	24.0295	24.2523	24.4934	24.6727	24.6984	24.694
49 Taiwan	0	0	0	0	0	0	0	0	0	0	0	0	0.0014	0.0013	0.0013	0.0013	0.0013	0.0013	0.0013	0.0013	0.0013	0.0013	0.0012	0.0012	0.0011	0.0011	0.0011	0.0011	0.001	0.001	0.001	0.001	0.001	0.001	0.001	0.001	0.001	0.001	0.0011	0.0011	0.0011	0.0011	0.0011	0.0011	0.0011	0.0011	0.0011	0.0011	0.0011
50 Indonesia	4112.72	5655.12	6011.83	5966.3	6983.67	7800.58	9752.54	10373.1	11243.9	11125	10260.5	10419	10560.9	9651.24	9577.29	9313.29	9228.5	9095.63	9083.49	8840.37	8593.5	8197.19	7766.93	7345.73	6995.55	6698.05	6469.64	6301.36	6146.84	6097.78	5996.88	5929.9	5852.75	5729.42	5761.04	5660.46	5635.42	5588.55	5539.75	5536.94	5472.13	5447.8	5425.45	5437.85	5432.04	5429.61	5412.53	5361.07	5303.59
51 Rest of ASEAN	1126.09	1202.01	1303.11	1239.68	1367.95	1438.03	1521.08	1396.42	1346.93	1341.52	1320.04	1344.97	1363.34	936.913	731.58	569.572	462.324	379.135	320.46	266.316	224.238	187.109	156.972	132.989	114.785	100.553	89.6381	81.166	73.9638	69.072	63.9995	59.8811	56.0432	52.0472	50.1204	46.9473	44.8162	42.6398	40.6165	39.1654	37.2697	35.8607	34.5656	33.6371	32.6238	31.7009	30.7245	29.5587	28.4225
52 OPEC excl Venezuela	42.3768	45.0558	45.4506	44.0604	32.2368	30.4578	32.556	29.1066	30.7218	29.9166	33.7476	37.3566	37.8641	35.1679	35.4211	34.9656	35.1601	35.1688	35.6387	35.207	34.7327	33.6231	32.32	30.9957	29.9142	29.0125	28.3723	27.9682	27.6067	27.7004	27.5583	27.5622	27.5148	27.2459	27.6953	27.5244	27.7076	27.7862	27.8534	28.147	28.1342	28.3221	28.5215	28.903	29.1968	29.5131	29.7566	29.8172	29.8419
53 Rest of world	1578.61	1625.8	1556.65	1663.28	1569.9	1855.88	2066.03	1997.29	2015.54	1958.06	1940.01	2333.66	2365.78	2192.34	2205.64	2174.23	2183.83	2181.72	2208.57	2178.77	2146.41	2074.43	1990.65	1905.87	1836.51	1778.55	1737.02	1710.24	1686.17	1690.31	1679.87	1678.47	1673.91	1655.72	1681.77	1669.61	1679.25	1682.42	1684.89	1701.22	1698.75	1708.55	1719.04	1740.61	1756.76	1774.25	1787.25	1789.08	1788.71
54 Ukraine	1445.62	1473.44	1586.39	1572.17	1458.25	1407.37	1684.65	1678.95	1703.72	1347.22	844.702	838.253	849.757	788.247	793.591	782.898	786.914	786.729	796.959	786.818	775.732	750.336	720.627	690.494	665.874	645.33	630.689	621.368	613.012	614.872	611.445	611.292	609.991	603.733	613.554	609.49	613.349	614.864	616.123	622.439	621.904	625.85	630.051	638.309	644.6	651.389	656.546	657.622	657.898
55 Saudi Arabia	0	0	0	0	0	0	0	0	0	0	0	0	0	0	0	0	0	0	0	0	0	0	0	0	0	0	0	0	0	0	0	0	0	0	0	0	0	0	0	0	0	0	0	0	0	0	0	0	0
56 Nigeria	0.2064	0.2064	0.5934	0.8256	0.8772	0.9804	0.8256	1.2384	1.1352	1.1868	1.2126	1.1868	1.2029	1.1173	1.1253	1.1109	1.1171	1.1174	1.1323	1.1186	1.1036	1.0683	1.0269	0.9848	0.9504	0.9218	0.9014	0.8886	0.8771	0.8801	0.8756	0.8757	0.8742	0.8657	0.88	0.8746	0.8804	0.8829	0.8851	0.8944	0.894	0.9	0.9064	0.9185	0.9279	0.938	0.9457	0.9477	0.9485
57 South Africa	5793.07	5787.65	5861.55	5967.8	5899.53	6026.65	5975.54	6113.18	6072.3	6171.87	6051.29	6052.21	6145.01	5592.71	5581.64	5445.37	5425.08	5372.43	5399.01	5271.44	5139.64	4906.22	4648.02	4393.89	4185.16	4009.83	3878.97	3786.93	3703.09	3688.91	3639.61	3612.54	3578.19	3512.09	3550.54	3499.05	3498.64	3483.1	3465.95	3480.34	3451.69	3450.85	3451.26	3475.97	3487.99	3502.4	3506.43	3485.83	3460.59
58 Rest of Africa	101.815	97.0778	91.8953	69.4904	78.1885	80.0298	98.2088	208.911	235.21	330.445	301.441	216.27	219.188	203.637	205.052	202.391	203.47	203.479	206.139	203.618	200.852	194.436	186.911	179.264	173.016	167.801	164.092	161.741	159.636	160.15	159.307	159.304	159.006	157.435	159.992	158.984	160.012	160.437	160.797	162.456	162.356	163.407	164.525	166.686	168.342	170.127	171.493	171.811	171.923
59 Africa OPEC	0	0	0	0	0	0	0	0	0	0	0	0	0.0036	0.0034	0.0034	0.0034	0.0034	0.0034	0.0034	0.0034	0.0033	0.0032	0.0031	0.003	0.0029	0.0028	0.0027	0.0027	0.0026	0.0027	0.0026	0.0026	0.0026	0.0026	0.0027	0.0026	0.0027	0.0027	0.0027	0.0027	0.0027	0.0027	0.0027	0.0028	0.0028	0.0028	0.0029	0.0029	0.0029
60 Malaysia	20.7985	23.781	28.3736	33.0981	56.4304	63.2664	76.9649	77.8623	76.3842	70.9207	67.5423	59.6241	60.4341	55.9601	56.2033	55.3219	55.4732	55.33	55.9114	55.0754	54.1788	52.2988	50.1321	47.9483	46.1554	44.6518	43.5606	42.8389	42.1866	42.2343	41.9215	41.8325	41.666	41.1643	41.752	41.3994	41.5821	41.606	41.6122	41.9571	41.8416	42.0255	42.2253	42.6934	43.0281	43.3937	43.6489	43.6332	43.5645
61 Kazakhstan	1602.89	1777.85	1800.58	2045.07	1854	2032.57	2130.9	2209.09	2195.53	2090.88	1972.39	1892.64	1918.37	1780.37	1791.95	1767.66	1776.27	1775.49	1797.99	1774.95	1749.8	1692.69	1625.93	1558.24	1502.88	1456.64	1423.63	1402.53	1383.59	1387.52	1379.62	1379.05	1375.91	1361.69	1383.42	1374.11	1382.5	1385.66	1388.24	1402.11	1400.68	1409.25	1418.39	1436.57	1450.36	1465.25	1476.49	1478.62	1478.97
0	Dan_2C_covid_S3
RERY	Primary energy supply (before trade), PJ, NER x NR
	2005	2006	2007	2008	2009	2010	2011	2012	2013	2014	2015	2016	2017	2018	2019	2020	2021	2022	2023	2024	2025	2026	2027	2028	2029	2030	2031	2032	2033	2034	2035	2036	2037	2038	2039	2040	2041	2042	2043	2044	2045	2046	2047	2048	2049	2050	2051	2052	2053
1 Belgium	2.3944	0.6371	0	0	0	0.3626	0.3173	0.4533	0.476	0.4306	0.34	0.3173	0.3178	0.2713	0.2752	0.2363	0.2025	0.1729	0.1542	0.1374	0.125	0.115	0.1073	0.0995	0.092	0.0852	0.0799	0.0782	0.0765	0.0749	0.0731	0.073	0.0724	0.0705	0.0687	0.0567	0.0566	0.0561	0.0561	0.0572	0.056	0.0572	0.0577	0.0585	0.0591	0.0598	0.059	0.0586	0.0574
2 Denmark	0	0	0	0	0	0	0	0	0	0	0	0	0.0069	0.0064	0.0064	0.006	0.0055	0.0051	0.0048	0.0046	0.0044	0.0042	0.004	0.0039	0.0037	0.0036	0.0035	0.0034	0.0034	0.0034	0.0033	0.0033	0.0033	0.0033	0.0032	0.0029	0.0029	0.0029	0.0029	0.0029	0.0029	0.0029	0.003	0.003	0.003	0.003	0.003	0.003	0.0029
3 Germany	2363.79	2228.23	2276.17	2095.79	1942.03	1921.99	1955.12	1992.76	1886.35	1847.75	1800.49	1663.2	1666	1538.61	1548.84	1434.2	1326.51	1224.28	1154.59	1088.47	1036.96	993.642	958.613	921.744	885.62	850.808	822.89	813.552	804.588	795.342	785.133	784.179	780.68	769.947	759.539	687.478	686.769	683.79	682.988	689.807	682.478	689.403	692.185	697.086	700.229	704.594	699.362	696.84	689.411
4 Greece	357.469	342.075	351.233	340.364	342.311	306.282	314.215	336.815	281.699	267.292	237.612	166.323	166.818	141.448	142.989	122.023	103.993	88.3402	78.4262	69.6016	63.111	57.9019	53.8752	49.789	45.9598	42.4316	39.6839	38.7899	37.9285	37.062	36.1157	36.0079	35.6918	34.7031	33.7819	27.7395	27.6792	27.43	27.3803	27.9123	27.3252	27.8875	28.071	28.4697	28.7203	29.0498	28.6265	28.4303	27.8246
5 Spain	262.293	253.256	228.451	175.603	159.555	138.013	110.896	103.026	73.8064	68.1698	52.1725	30.8225	30.8723	28.6011	28.7905	26.7389	24.8041	22.9603	21.7002	20.5014	19.5658	18.7775	18.1394	17.4663	16.8057	16.1678	15.6558	15.4856	15.3222	15.1534	14.9667	14.9509	14.888	14.6914	14.5006	13.1668	13.155	13.1011	13.0875	13.2155	13.0808	13.2108	13.2639	13.3563	13.4161	13.4986	13.4029	13.3574	13.2208
6 France	16.042	11.752	10.972	7.202	3.822	6.786	3.874	7.54	8.138	7.8	0	0	0.0022	0.002	0.002	0.0019	0.0018	0.0016	0.0016	0.0015	0.0014	0.0013	0.0013	0.0013	0.0012	0.0012	0.0011	0.0011	0.0011	0.0011	0.0011	0.0011	0.0011	0.0011	0.001	0.001	0.001	0.0009	0.0009	0.001	0.0009	0.001	0.001	0.001	0.001	0.001	0.001	0.001	0.001
7 Ireland	0	0	0	0	0	0	0	0	0	0	0	0	0.0007	0.0006	0.0006	0.0006	0.0005	0.0005	0.0005	0.0004	0.0004	0.0004	0.0004	0.0004	0.0004	0.0004	0.0003	0.0003	0.0003	0.0003	0.0003	0.0003	0.0003	0.0003	0.0003	0.0003	0.0003	0.0003	0.0003	0.0003	0.0003	0.0003	0.0003	0.0003	0.0003	0.0003	0.0003	0.0003	0.0003
8 Italy	2.5258	0.5583	4.2007	3.1107	1.9142	2.6853	2.446	2.127	1.9408	2.2865	2.1536	0	0.0084	0.0078	0.0079	0.0073	0.0068	0.0063	0.006	0.0057	0.0054	0.0052	0.005	0.0048	0.0047	0.0045	0.0043	0.0043	0.0043	0.0042	0.0042	0.0042	0.0041	0.0041	0.004	0.0037	0.0037	0.0037	0.0036	0.0037	0.0036	0.0037	0.0037	0.0037	0.0037	0.0038	0.0037	0.0037	0.0037
9 Luxembourg	0	0	0	0	0	0	0	0	0	0	0	0	0	0	0	0	0	0	0	0	0	0	0	0	0	0	0	0	0	0	0	0	0	0	0	0	0	0	0	0	0	0	0	0	0	0	0	0	0
10 Netherlands	0	0	0	0	0	0	0	0	0	0	0	0	0.049	0.0454	0.0457	0.0425	0.0394	0.0365	0.0345	0.0327	0.0312	0.0299	0.0289	0.0279	0.0268	0.0258	0.025	0.0247	0.0245	0.0242	0.0239	0.0239	0.0238	0.0235	0.0232	0.0211	0.0211	0.021	0.021	0.0212	0.021	0.0212	0.0213	0.0214	0.0215	0.0217	0.0215	0.0214	0.0212
11 Austria	0	0	0	0	0	0	0	0	0	0	0	0	0	0	0	0	0	0	0	0	0	0	0	0	0	0	0	0	0	0	0	0	0	0	0	0	0	0	0	0	0	0	0	0	0	0	0	0	0
12 Portugal	0	0	0	0	0	0	0	0	0	0	0	0	0	0	0	0	0	0	0	0	0	0	0	0	0	0	0	0	0	0	0	0	0	0	0	0	0	0	0	0	0	0	0	0	0	0	0	0	0
13 Finland	0	0	0	0	0	0	0	0	0	0	0	0	0	0	0	0	0	0	0	0	0	0	0	0	0	0	0	0	0	0	0	0	0	0	0	0	0	0	0	0	0	0	0	0	0	0	0	0	0
14 Sweden	0	0	0	0	0	0	0	0	0	0	0	0	0.0001	0.0001	0.0001	0.0001	0.0001	0.0001	0.0001	0.0001	0	0	0	0	0	0	0	0	0	0	0	0	0	0	0	0	0	0	0	0	0	0	0	0	0	0	0	0	0
15 UK	505.18	453.668	425.083	449.323	438.56	453.869	458.007	420.337	317.05	289.907	214.153	104.725	104.891	97.3291	97.9975	91.1514	84.6807	78.5007	74.2754	70.2492	67.1052	64.4551	62.3098	60.0432	57.8156	55.6626	53.9345	53.3669	52.8219	52.2583	51.6333	51.5895	51.3855	50.7258	50.0855	45.5447	45.5125	45.3361	45.2978	45.7431	45.2906	45.7429	45.9323	46.2563	46.4689	46.7592	46.4403	46.2931	45.8339
16 Czech Republic	986.828	999.037	996.626	953.968	873.085	871.947	879.324	848.802	744.039	710.876	708	674.892	675.968	623.316	624.064	577.035	533.086	491.588	462.873	435.756	414.432	396.398	381.664	366.339	351.408	337.077	325.458	320.959	316.633	312.229	307.493	306.264	304.087	299.222	294.51	266.84	265.904	264.127	263.168	265.033	261.659	263.556	263.914	265.043	265.518	266.431	263.847	262.26	258.907
17 Estonia	0	0	0	0	0	0	0	0	0	0	0	0	0	0	0	0	0	0	0	0	0	0	0	0	0	0	0	0	0	0	0	0	0	0	0	0	0	0	0	0	0	0	0	0	0	0	0	0	0
18 Cyprus	0	0	0	0	0	0	0	0	0	0	0	0	0	0	0	0	0	0	0	0	0	0	0	0	0	0	0	0	0	0	0	0	0	0	0	0	0	0	0	0	0	0	0	0	0	0	0	0	0
19 Latvia	0	0	0	0	0	0	0	0	0	0	0	0	0	0	0	0	0	0	0	0	0	0	0	0	0	0	0	0	0	0	0	0	0	0	0	0	0	0	0	0	0	0	0	0	0	0	0	0	0
20 Lithuania	0	0	0	0	0	0	0	0	0	0	0	0	0	0	0	0	0	0	0	0	0	0	0	0	0	0	0	0	0	0	0	0	0	0	0	0	0	0	0	0	0	0	0	0	0	0	0	0	0
21 Hungary	73.1914	73.5453	74.2241	70.9062	65.1485	66.7072	68.8915	67.2596	67.4795	66.4845	63.5675	61.2311	61.3343	55.6648	55.1901	50.2752	45.7923	41.66	38.7759	36.1018	33.9927	32.2115	30.7472	29.26	27.8333	26.4819	25.3776	24.8747	24.3925	23.9104	23.4078	23.1929	22.9047	22.4062	21.9262	19.6561	19.4986	19.2775	19.1216	19.1837	18.8443	18.9096	18.8567	18.8626	18.8186	18.8075	18.5349	18.3394	18.0148
22 Malta	0	0	0	0	0	0	0	0	0	0	0	0	0	0	0	0	0	0	0	0	0	0	0	0	0	0	0	0	0	0	0	0	0	0	0	0	0	0	0	0	0	0	0	0	0	0	0	0	0
23 Poland	2882.9	2828.52	2616.28	2550.2	2362.09	2318.7	2332.85	2420.78	2392.16	2262.29	2255.29	2190.03	2193.51	2033.45	2045.77	1901.15	1764.7	1634.61	1545.5	1460.71	1394.42	1338.52	1293.2	1245.43	1198.55	1153.29	1116.9	1104.61	1092.8	1080.62	1067.19	1065.79	1061.09	1046.98	1033.28	939.077	938.029	934.01	932.842	941.641	931.934	940.871	944.386	950.667	954.649	960.222	953.266	949.848	940.024
24 Slovenia	49.5723	50.6419	51.8849	49.607	48.5596	50.0723	50.2627	45.7703	45.0042	34.2502	36.1088	39.4345	39.5008	35.8928	35.5553	32.4253	29.5671	26.9295	25.0817	23.3673	22.0118	20.8652	19.9205	18.962	18.0424	17.1713	16.458	16.1281	15.8117	15.4958	15.167	15.0218	14.8299	14.5046	14.1914	12.7393	12.6326	12.4855	12.38	12.4133	12.1912	12.2265	12.1869	12.1844	12.1503	12.137	11.9579	11.8279	11.6163
25 Slovakia	26.6744	23.5199	23.0585	26.1151	27.351	25.6824	25.188	23.7566	24.4641	24.2562	20.7376	18.9133	18.9342	9.0979	5.5851	3.3176	2.1797	1.5367	1.177	0.9322	0.7696	0.6529	0.5676	0.4961	0.437	0.3876	0.3497	0.3286	0.31	0.2931	0.2774	0.2683	0.2586	0.2458	0.2342	0.1924	0.1882	0.1832	0.1797	0.1796	0.1734	0.174	0.1722	0.172	0.1712	0.1707	0.1663	0.1634	0.1583
26 Bulgaria	174.922	180.342	201.436	203.441	192.529	206.819	259.975	234.911	200.444	214.349	244.994	213.593	213.934	197.768	198.504	183.983	170.351	157.419	148.517	140.08	133.465	127.879	123.333	118.574	113.92	109.44	105.823	104.511	103.249	101.957	100.55	100.286	99.7109	98.2501	96.834	87.8552	87.6542	87.1751	86.9644	87.6867	86.6769	87.4107	87.6362	88.1184	88.3849	88.7983	88.0467	87.6255	86.6122
27 Romania	242.556	271.213	287.137	291.449	274.796	247.142	278.92	265.682	194.955	186.257	197.245	177.268	177.555	163.351	163.369	150.733	138.965	127.893	120.224	113.001	107.32	102.516	98.5878	94.5157	90.5566	86.7638	83.6855	82.4638	81.2891	80.0967	78.8202	78.4545	77.8442	76.5391	75.2761	68.0886	67.8112	67.3176	67.0354	67.4806	66.5768	67.0302	67.0872	67.3421	67.4287	67.6277	66.9288	66.4868	65.5926
28 Norway	41.3351	67.2995	114.451	96.383	74.2121	54.3735	38.9466	34.5349	52.1255	47.0675	31.0786	22.9858	23.0239	21.0407	20.9196	19.1802	17.5782	16.0874	15.0456	14.0728	13.304	12.6532	12.1177	11.5701	11.0419	10.5392	10.1284	9.947	9.7729	9.5979	9.4142	9.3414	9.2397	9.0558	8.8784	7.9995	7.9452	7.8656	7.8114	7.8429	7.7162	7.7487	7.7348	7.7438	7.7332	7.7356	7.6342	7.5631	7.4406
29 Switzerland	0	0	0	0	0	0	0	0	0	0	0	0	0	0	0	0	0	0	0	0	0	0	0	0	0	0	0	0	0	0	0	0	0	0	0	0	0	0	0	0	0	0	0	0	0	0	0	0	0
30 Iceland	0	0	0	0	0	0	0	0	0	0	0	0	0	0	0	0	0	0	0	0	0	0	0	0	0	0	0	0	0	0	0	0	0	0	0	0	0	0	0	0	0	0	0	0	0	0	0	0	0
31 Croatia	0	0	0	0	0	0	0	0	0	0	0	0	0	0	0	0	0	0	0	0	0	0	0	0	0	0	0	0	0	0	0	0	0	0	0	0	0	0	0	0	0	0	0	0	0	0	0	0	0
32 Turkey	442.744	542.11	628.418	685.518	700.789	700.903	695.852	651.228	566.957	578.352	535.846	648.854	650.035	575.199	560.57	498.846	444.55	396.233	362.39	331.835	307.796	287.636	271.046	254.692	239.325	225.036	213.317	207.208	201.39	195.676	189.885	186.665	182.86	177.335	172.062	152.076	149.849	147.127	144.967	144.579	140.978	140.634	139.35	138.53	137.32	136.371	133.415	131.089	127.817
33 Macedonia	0	0	0	0	0	0	0	0	0	0	0	0	0	0	0	0	0	0	0	0	0	0	0	0	0	0	0	0	0	0	0	0	0	0	0	0	0	0	0	0	0	0	0	0	0	0	0	0	0
34 USA	23667.2	24181.5	23801.8	24254.1	22195.7	22267.1	22456.4	20745	19978.8	20307.3	18056.9	14589.5	14612.8	13554.9	13646.9	12689.6	11785.3	10922	10331.7	9769.51	9330.49	8960.46	8660.89	8344.5	8033.66	7733.29	7492.18	7412.71	7336.4	7257.52	7170.1	7163.6	7134.8	7042.59	6953.1	6320.97	6316.16	6291.32	6285.68	6347.29	6284.04	6346.62	6372.64	6417.37	6446.61	6486.65	6441.97	6421.18	6357.01
35 Japan	27.1264	29.3437	27.7818	28.0143	26.196	24.8631	25.9558	27.0698	30.5179	32.1598	30.8628	31.4259	31.4761	29.1892	29.383	27.3147	25.3616	23.498	22.2235	21.0099	20.0622	19.2633	18.6164	17.9336	17.2629	16.615	16.0948	15.9224	15.7568	15.5858	15.3964	15.3811	15.3178	15.1182	14.9246	13.5649	13.5535	13.499	13.4858	13.6171	13.4802	13.6136	13.6684	13.7634	13.8251	13.9099	13.8129	13.7671	13.6283
36 Canada	1446.67	1450.18	1554.77	1411.55	1288.91	1421.22	1413.34	1407.17	1472.57	1453.85	1288.31	1257.04	1259.04	1167.61	1175.19	1092.51	1014.44	939.943	888.973	840.442	802.529	770.565	744.672	717.349	690.515	664.594	643.774	636.843	630.186	623.311	615.707	615.049	612.479	604.471	596.698	542.392	541.902	539.694	539.133	544.337	538.837	544.123	546.273	550.026	552.451	555.798	551.89	550.029	544.455
37 Australia	8439.69	8533.05	9000.75	9039.73	9350.5	10323.1	9782.07	10272.4	11074.8	11950.8	12501	12226.8	12246.3	11356.1	11429.3	10624.4	9864.45	9139.46	8643.36	8171.04	7802.04	7490.93	7238.89	6972.97	6711.84	6459.61	6256.99	6189.42	6124.51	6057.5	5983.4	5976.83	5951.68	5873.66	5797.95	5269.98	5265.08	5243.48	5237.89	5288.32	5234.75	5285.97	5306.73	5343.06	5366.47	5398.85	5360.74	5342.51	5288.21
38 New Zealand	132.462	142.527	118.567	118.784	111.111	131.361	121.159	120.698	114.687	97.9343	81.024	68.3284	68.4395	63.3296	63.7064	59.1008	54.7662	50.6437	47.8233	45.1441	43.0517	41.2885	39.8597	38.356	36.8819	35.4604	34.3179	33.9292	33.5559	33.1713	32.7477	32.6999	32.5489	32.1046	31.6735	28.7369	28.7009	28.5726	28.533	28.8032	28.4981	28.7726	28.8784	29.0703	29.1906	29.3603	29.1407	29.0311	28.7225
39 Russian Federation	6574.68	6657.81	6809.95	6991.92	6423.52	6954.53	6875.74	7738.53	7700.05	7932.73	8375.27	8745.14	8759.08	8124.8	8179.36	7605.46	7063.34	6545.85	6191.97	5854.91	5591.67	5369.79	5190.12	5000.41	4814.03	4633.95	4489.37	4441.61	4395.74	4348.34	4295.83	4291.77	4274.37	4219	4165.27	3786.64	3783.63	3768.64	3765.13	3801.89	3763.91	3801.25	3816.69	3843.35	3860.72	3884.55	3857.68	3845.11	3806.57
40 Rest of Annex I	0	0	0	0	0	0	0	0	0	0	0	0	0	0	0	0	0	0	0	0	0	0	0	0	0	0	0	0	0	0	0	0	0	0	0	0	0	0	0	0	0	0	0	0	0	0	0	0	0
41 China	51373.4	55862.4	60779.1	62263	65631.7	72117.2	78026.3	77583.2	79317.4	79620.1	78826.4	71967.1	72083.9	66402.6	66511.8	61441	56706.9	52240.9	49157.7	46247.8	43963.2	42033.3	40458.7	38820.5	37224.5	35693.2	34453.4	33978.5	33521.9	33056.9	32555.9	32431.6	32205.4	31690.1	31191.1	28226.1	28131.7	27947	27850	28056.3	27699.9	27909.7	27954.2	28081.6	28138.8	28243.3	27971.5	27807	27452.2
42 India	6837.39	7152.76	7584.26	8182.75	8868.59	8912.63	9292.77	9800.64	9933.98	10605.7	11034.7	11223.6	11241.8	10388.6	10435.3	9668.61	8948.86	8266.04	7797.26	7352.88	7005.09	6711.72	6473.37	6223.5	5979.07	5743.72	5554.06	5486.62	5421.81	5355.33	5282.71	5270.78	5242.27	5166.62	5093.28	4617.65	4608.6	4584.74	4575.13	4615.18	4563.05	4603.73	4617.37	4644.71	4660.57	4684.29	4645.87	4625.05	4572.6
43 Mexico	296.45	336.364	357.051	318.329	276.83	335.186	434.123	332.631	321.405	324.566	241.761	291.395	291.869	269.386	270.33	250.177	231.297	213.423	201.13	189.495	180.38	172.687	166.428	159.885	153.494	147.348	142.387	140.574	138.832	137.049	135.111	134.732	133.928	131.919	129.972	117.743	117.454	116.788	116.487	117.453	116.067	117.048	117.34	117.979	118.326	118.871	117.836	117.249	115.859
44 Brazil	103.971	95.7789	98.3746	111.406	93.7561	88.1214	89.34	105.389	138.101	128.119	128.386	110.353	110.532	102.311	102.937	95.5226	88.5405	81.8966	77.3524	73.0342	69.6622	66.8209	64.5191	62.0952	59.7183	57.4253	55.5831	54.9601	54.3616	53.7448	53.0647	52.9927	52.7536	52.0394	51.3466	46.5951	46.5411	46.3374	46.2774	46.7194	46.2293	46.6782	46.854	47.1692	47.3686	47.6481	47.2964	47.1229	46.6269
45 Argentina	0.6176	3.483	2.7172	3.977	2.0256	1.6056	2.2232	2.3467	2.0503	1.408	0.8399	0.5681	0.569	0.5268	0.5306	0.4925	0.4565	0.4223	0.399	0.3768	0.3596	0.345	0.3332	0.3208	0.3086	0.2969	0.2874	0.2843	0.2814	0.2783	0.2749	0.2746	0.2735	0.2699	0.2665	0.2418	0.2416	0.2406	0.2404	0.2428	0.2404	0.2428	0.2439	0.2456	0.2468	0.2484	0.2466	0.2458	0.2433
46 Colombia	1607.37	1785.13	1902.31	2000.28	1981.37	2023.36	2335.04	2422.7	2326.69	2410.56	2328.1	2463.19	2467.66	2238.97	2231.45	2032.22	1850.08	1681.75	1565.9	1458.22	1374.03	1303.31	1245.67	1186.62	1129.75	1075.74	1032.02	1013.92	996.554	979.045	960.499	954.302	944.839	926.116	908.059	811.739	807.208	799.852	795.287	800.25	787.561	792.619	792.486	794.923	795.153	796.836	786.847	780.227	767.787
47 Rest of Latin America	232.449	227.587	193.982	165.59	119.622	96.6329	79.2346	55.2204	85.5831	112.849	85.3175	72.6889	72.8058	67.4835	67.9365	63.1254	58.585	54.2551	51.2957	48.4789	46.2801	44.4274	42.9276	41.3448	39.7906	38.2894	37.0845	36.6857	36.3027	35.907	35.4689	35.4339	35.288	34.8263	34.3782	31.2303	31.2044	31.0788	31.0487	31.3531	31.0366	31.3458	31.4731	31.6935	31.8368	32.0338	31.8095	31.7041	31.383
48 Korea	52.7828	52.6337	55.5815	53.4052	48.5134	40.1358	40.1358	39.0133	33.8153	32.567	32.8651	32.1571	32.2093	29.8073	29.9803	27.8152	25.7772	23.8388	22.5118	21.2513	20.2664	19.4363	18.7634	18.0554	17.3614	16.6922	16.1541	15.9703	15.7938	15.6119	15.4118	15.3883	15.3163	15.1065	14.903	13.5225	13.5047	13.4436	13.4242	13.5503	13.4061	13.5342	13.5831	13.6723	13.7279	13.8068	13.7028	13.6504	13.5047
49 Taiwan	0	0	0	0	0	0	0	0	0	0	0	0	0.0014	0.0013	0.0013	0.0012	0.0011	0.0011	0.001	0.0009	0.0009	0.0009	0.0008	0.0008	0.0008	0.0007	0.0007	0.0007	0.0007	0.0007	0.0007	0.0007	0.0007	0.0007	0.0007	0.0006	0.0006	0.0006	0.0006	0.0006	0.0006	0.0006	0.0006	0.0006	0.0006	0.0006	0.0006	0.0006	0.0006
50 Indonesia	4112.72	5655.12	6011.83	5966.3	6983.67	7800.58	9752.54	10373.1	11243.9	11125	10260.5	10419	10435.8	9522.34	9448.47	8650.52	7917.69	7237.68	6760.75	6316.43	5964.65	5666.55	5420.79	5170.42	4929.47	4700.57	4513.06	4427.63	4345.61	4263.49	4177.74	4141.09	4091.82	4006.51	3924.26	3534.08	3506.84	3468.6	3441.58	3452.13	3393.4	3404.46	3395.15	3395.9	3388.06	3385.88	3338.56	3304.51	3248.18
51 Rest of ASEAN	1126.09	1202.01	1303.11	1239.68	1367.95	1438.03	1521.08	1396.42	1346.93	1341.52	1320.04	1344.97	1347.15	927.577	726.399	531.977	402.042	311.467	252.503	207.955	175.624	150.885	131.771	115.504	101.851	90.3491	81.1945	75.1238	69.7324	64.8646	60.3939	57.1239	53.9207	50.4394	47.2938	40.2187	38.5514	36.8485	35.3913	34.4684	32.7847	31.9944	31.0136	30.1922	29.3195	28.547	27.3597	26.3678	25.2151
52 OPEC excl Venezuela	42.3768	45.0558	45.4506	44.0604	32.2368	30.4578	32.556	29.1066	30.7218	29.9166	33.7476	37.3566	37.4166	34.6936	34.9337	32.4708	30.1453	27.9264	26.4106	24.9671	23.8406	22.8915	22.1235	21.3124	20.5156	19.7458	19.1281	18.9252	18.7304	18.529	18.3056	18.2899	18.2169	17.9812	17.7525	16.132	16.1204	16.0574	16.0437	16.2024	16.0409	16.2022	16.2696	16.3852	16.4609	16.5644	16.4506	16.398	16.2341
53 Rest of world	1578.61	1625.8	1556.65	1663.28	1569.9	1855.88	2066.03	1997.29	2015.54	1958.06	1940.01	2333.66	2337.45	2162.42	2174.96	2017.27	1868.89	1727.83	1631.28	1539.6	1467.99	1407.64	1358.72	1307.27	1256.84	1208.22	1169.13	1155.77	1142.94	1129.72	1115.18	1113.45	1108.21	1092.97	1078.18	977.999	976.7	972.254	970.829	979.963	969.495	978.77	982.302	988.76	992.782	998.487	990.929	987.119	976.536
54 Ukraine	1445.62	1473.44	1586.39	1572.17	1458.25	1407.37	1684.65	1678.95	1703.72	1347.22	844.702	838.253	839.613	777.513	782.572	726.513	673.677	623.357	588.967	556.266	530.743	509.242	491.834	473.483	455.476	438.097	424.145	419.486	415.012	410.394	405.291	404.829	403.09	397.72	392.51	356.272	355.927	354.439	354.047	357.497	353.815	357.319	358.734	361.216	362.813	365.025	362.403	361.145	357.414
55 Saudi Arabia	0	0	0	0	0	0	0	0	0	0	0	0	0	0	0	0	0	0	0	0	0	0	0	0	0	0	0	0	0	0	0	0	0	0	0	0	0	0	0	0	0	0	0	0	0	0	0	0	0
56 Nigeria	0.2064	0.2064	0.5934	0.8256	0.8772	0.9804	0.8256	1.2384	1.1352	1.1868	1.2126	1.1868	1.1887	1.1022	1.1098	1.0316	0.9576	0.8871	0.8389	0.7931	0.7573	0.7271	0.7027	0.6769	0.6516	0.6271	0.6075	0.6011	0.5949	0.5885	0.5814	0.5809	0.5786	0.5711	0.5638	0.5123	0.5119	0.5099	0.5095	0.5146	0.5094	0.5146	0.5167	0.5204	0.5228	0.5261	0.5225	0.5208	0.5156
57 South Africa	5793.07	5787.65	5861.55	5967.8	5899.53	6026.65	5975.54	6113.18	6072.3	6171.87	6051.29	6052.21	6063.17	5508.61	5496.81	5012.24	4568.22	4156.95	3874.34	3611.2	3405.63	3232.95	3092.37	2947.99	2808.72	2676.29	2569.21	2525.74	2484.03	2441.89	2397.1	2383.06	2360.84	2315.44	2271.63	2031.91	2021.62	2004.23	1993.82	2007.29	1976.5	1990.2	1990.9	1998.05	1999.67	2004.95	1980.87	1965.24	1934.93
58 Rest of Africa	101.815	97.0778	91.8953	69.4904	78.1885	80.0298	98.2088	208.911	235.21	330.445	301.441	216.27	216.615	200.908	202.25	188.041	174.62	161.811	153.051	144.709	138.194	132.702	128.255	123.56	118.948	114.493	110.915	109.731	108.595	107.42	106.12	106.017	105.585	104.213	102.883	93.5219	93.4457	93.0731	92.9846	93.8913	92.9505	93.8714	94.2513	94.908	95.3354	95.9223	95.2562	94.9436	93.9894
59 Africa OPEC	0	0	0	0	0	0	0	0	0	0	0	0	0.0036	0.0033	0.0033	0.0031	0.0029	0.0027	0.0025	0.0024	0.0023	0.0022	0.0021	0.002	0.002	0.0019	0.0018	0.0018	0.0018	0.0018	0.0017	0.0017	0.0017	0.0017	0.0017	0.0015	0.0015	0.0015	0.0015	0.0015	0.0015	0.0015	0.0015	0.0016	0.0016	0.0016	0.0016	0.0016	0.0015
60 Malaysia	20.7985	23.781	28.3736	33.0981	56.4304	63.2664	76.9649	77.8623	76.3842	70.9207	67.5423	59.6241	59.7199	55.2069	55.4335	51.378	47.5697	43.9562	41.4717	39.1164	37.2712	35.7137	34.4471	33.1201	31.8221	30.5723	29.5642	29.2022	28.8541	28.4974	28.1084	28.0401	27.8842	27.4796	27.0873	24.5707	24.5187	24.3885	24.3337	24.5411	24.2617	24.4724	24.5402	24.6803	24.7598	24.8806	24.6737	24.5597	24.279
61 Kazakhstan	1602.89	1777.85	1800.58	2045.07	1854	2032.57	2130.9	2209.09	2195.53	2090.88	1972.39	1892.64	1895.68	1756.35	1767.31	1641.48	1522.84	1409.79	1332.43	1258.85	1201.38	1152.93	1113.67	1072.3	1031.7	992.512	961.025	950.436	940.265	929.773	918.192	917.048	913.033	900.857	889.044	807.459	806.601	803.17	802.207	809.881	801.521	809.315	812.412	817.908	821.411	826.296	820.317	817.405	808.939
0	Dan_2C_QU_covid_S3
RERY	Primary energy supply (before trade), PJ, NER x NR
	2005	2006	2007	2008	2009	2010	2011	2012	2013	2014	2015	2016	2017	2018	2019	2020	2021	2022	2023	2024	2025	2026	2027	2028	2029	2030	2031	2032	2033	2034	2035	2036	2037	2038	2039	2040	2041	2042	2043	2044	2045	2046	2047	2048	2049	2050	2051	2052	2053
1 Belgium	2.3944	0.6371	0	0	0	0.3626	0.3173	0.4533	0.476	0.4306	0.34	0.3173	0.3178	0.2713	0.2752	0.2363	0.2025	0.173	0.1542	0.1374	0.1251	0.1151	0.1074	0.0995	0.0921	0.0852	0.0799	0.0783	0.0767	0.075	0.0732	0.073	0.0725	0.0706	0.0688	0.0567	0.0566	0.0562	0.0561	0.0572	0.0561	0.0573	0.0577	0.0585	0.0591	0.0598	0.0591	0.0587	0.0575
2 Denmark	0	0	0	0	0	0	0	0	0	0	0	0	0.0069	0.0064	0.0064	0.006	0.0055	0.0051	0.0048	0.0046	0.0044	0.0042	0.004	0.0039	0.0037	0.0036	0.0035	0.0034	0.0034	0.0034	0.0033	0.0033	0.0033	0.0033	0.0032	0.0029	0.0029	0.0029	0.0029	0.0029	0.0029	0.0029	0.003	0.003	0.003	0.003	0.003	0.003	0.0029
3 Germany	2363.79	2228.23	2276.17	2095.79	1942.03	1921.99	1955.12	1992.76	1886.35	1847.75	1800.49	1663.2	1666	1538.61	1548.84	1434.24	1326.59	1224.45	1154.82	1088.72	1037.23	993.945	958.915	922.034	885.908	851.058	823.24	813.966	804.986	795.74	785.527	784.571	781.051	770.293	759.888	687.783	687.067	684.042	683.24	690.052	682.722	689.645	692.416	697.317	700.464	704.825	699.626	697.071	689.662
4 Greece	357.469	342.075	351.233	340.364	342.311	306.282	314.215	336.815	281.699	267.292	237.612	166.323	166.818	141.448	142.989	122.023	104.004	88.3592	78.4459	69.6278	63.1398	57.9314	53.8946	49.8258	45.9891	42.4396	39.7306	38.8372	37.9905	37.1056	36.1418	36.0367	35.728	34.7523	33.8105	27.7692	27.6904	27.4522	27.3887	27.9439	27.3353	27.9052	28.0924	28.4909	28.7377	29.0674	28.6694	28.4476	27.8531
5 Spain	262.293	253.256	228.451	175.603	159.555	138.013	110.896	103.026	73.8064	68.1698	52.1725	30.8225	30.8723	28.6011	28.7905	26.7395	24.8055	22.9633	21.7044	20.506	19.5706	18.7831	18.1449	17.4717	16.8109	16.1724	15.6622	15.4932	15.3295	15.1608	14.974	14.9581	14.8949	14.6978	14.5071	13.1725	13.1606	13.1057	13.0922	13.2201	13.0853	13.2153	13.2682	13.3606	13.4205	13.5029	13.4078	13.3617	13.2254
6 France	16.042	11.752	10.972	7.202	3.822	6.786	3.874	7.54	8.138	7.8	0	0	0.0022	0.002	0.002	0.0019	0.0018	0.0016	0.0016	0.0015	0.0014	0.0013	0.0013	0.0013	0.0012	0.0012	0.0011	0.0011	0.0011	0.0011	0.0011	0.0011	0.0011	0.0011	0.001	0.001	0.001	0.0009	0.0009	0.001	0.0009	0.001	0.001	0.001	0.001	0.001	0.001	0.001	0.001
7 Ireland	0	0	0	0	0	0	0	0	0	0	0	0	0.0007	0.0006	0.0006	0.0006	0.0005	0.0005	0.0005	0.0004	0.0004	0.0004	0.0004	0.0004	0.0004	0.0004	0.0003	0.0003	0.0003	0.0003	0.0003	0.0003	0.0003	0.0003	0.0003	0.0003	0.0003	0.0003	0.0003	0.0003	0.0003	0.0003	0.0003	0.0003	0.0003	0.0003	0.0003	0.0003	0.0003
8 Italy	2.5258	0.5583	4.2007	3.1107	1.9142	2.6853	2.446	2.127	1.9408	2.2865	2.1536	0	0.0084	0.0078	0.0079	0.0073	0.0068	0.0063	0.006	0.0057	0.0054	0.0052	0.005	0.0048	0.0047	0.0045	0.0043	0.0043	0.0043	0.0042	0.0042	0.0042	0.0041	0.0041	0.004	0.0037	0.0037	0.0037	0.0036	0.0037	0.0036	0.0037	0.0037	0.0037	0.0037	0.0038	0.0037	0.0037	0.0037
9 Luxembourg	0	0	0	0	0	0	0	0	0	0	0	0	0	0	0	0	0	0	0	0	0	0	0	0	0	0	0	0	0	0	0	0	0	0	0	0	0	0	0	0	0	0	0	0	0	0	0	0	0
10 Netherlands	0	0	0	0	0	0	0	0	0	0	0	0	0.049	0.0454	0.0457	0.0425	0.0394	0.0365	0.0346	0.0327	0.0312	0.0299	0.0289	0.0279	0.0268	0.0258	0.025	0.0248	0.0245	0.0242	0.0239	0.0239	0.0238	0.0235	0.0232	0.0211	0.0211	0.021	0.021	0.0212	0.021	0.0212	0.0213	0.0214	0.0215	0.0217	0.0215	0.0214	0.0212
11 Austria	0	0	0	0	0	0	0	0	0	0	0	0	0	0	0	0	0	0	0	0	0	0	0	0	0	0	0	0	0	0	0	0	0	0	0	0	0	0	0	0	0	0	0	0	0	0	0	0	0
12 Portugal	0	0	0	0	0	0	0	0	0	0	0	0	0	0	0	0	0	0	0	0	0	0	0	0	0	0	0	0	0	0	0	0	0	0	0	0	0	0	0	0	0	0	0	0	0	0	0	0	0
13 Finland	0	0	0	0	0	0	0	0	0	0	0	0	0	0	0	0	0	0	0	0	0	0	0	0	0	0	0	0	0	0	0	0	0	0	0	0	0	0	0	0	0	0	0	0	0	0	0	0	0
14 Sweden	0	0	0	0	0	0	0	0	0	0	0	0	0.0001	0.0001	0.0001	0.0001	0.0001	0.0001	0.0001	0.0001	0	0	0	0	0	0	0	0	0	0	0	0	0	0	0	0	0	0	0	0	0	0	0	0	0	0	0	0	0
15 UK	505.18	453.668	425.083	449.323	438.56	453.869	458.007	420.337	317.05	289.907	214.153	104.725	104.891	97.3291	97.9975	91.1535	84.6854	78.5111	74.2896	70.2647	67.1215	64.4739	62.3286	60.0613	57.8335	55.6783	53.9565	53.3929	52.8469	52.2834	51.6581	51.6142	51.4089	50.7476	50.1076	45.5642	45.5315	45.3522	45.314	45.7587	45.3062	45.7583	45.9471	46.2711	46.484	46.7739	46.4571	46.3079	45.8499
16 Czech Republic	986.828	999.037	996.626	953.968	873.085	871.947	879.324	848.802	744.039	710.876	708	674.892	675.968	623.316	624.064	577.048	533.116	491.654	462.962	435.852	414.531	396.513	381.778	366.448	351.515	337.17	325.589	321.113	316.78	312.376	307.637	306.407	304.222	299.346	294.635	266.949	266.009	264.215	263.256	265.118	261.743	263.639	263.993	265.121	265.597	266.508	263.935	262.337	258.99
17 Estonia	0	0	0	0	0	0	0	0	0	0	0	0	0	0	0	0	0	0	0	0	0	0	0	0	0	0	0	0	0	0	0	0	0	0	0	0	0	0	0	0	0	0	0	0	0	0	0	0	0
18 Cyprus	0	0	0	0	0	0	0	0	0	0	0	0	0	0	0	0	0	0	0	0	0	0	0	0	0	0	0	0	0	0	0	0	0	0	0	0	0	0	0	0	0	0	0	0	0	0	0	0	0
19 Latvia	0	0	0	0	0	0	0	0	0	0	0	0	0	0	0	0	0	0	0	0	0	0	0	0	0	0	0	0	0	0	0	0	0	0	0	0	0	0	0	0	0	0	0	0	0	0	0	0	0
20 Lithuania	0	0	0	0	0	0	0	0	0	0	0	0	0	0	0	0	0	0	0	0	0	0	0	0	0	0	0	0	0	0	0	0	0	0	0	0	0	0	0	0	0	0	0	0	0	0	0	0	0
21 Hungary	73.1914	73.5453	74.2241	70.9062	65.1485	66.7072	68.8915	67.2596	67.4795	66.4845	63.5675	61.2311	61.3343	55.6648	55.1901	50.2764	45.795	41.6658	38.7837	36.1101	34.0012	32.2211	30.7565	29.269	27.8419	26.4892	25.388	24.8869	24.4041	23.9218	23.4188	23.2037	22.9148	22.4154	21.9353	19.6639	19.506	19.2836	19.1276	19.1894	18.8498	18.915	18.8618	18.8676	18.8236	18.8123	18.5406	18.3441	18.0201
22 Malta	0	0	0	0	0	0	0	0	0	0	0	0	0	0	0	0	0	0	0	0	0	0	0	0	0	0	0	0	0	0	0	0	0	0	0	0	0	0	0	0	0	0	0	0	0	0	0	0	0
23 Poland	2882.9	2828.52	2616.28	2550.2	2362.09	2318.7	2332.85	2420.78	2392.16	2262.29	2255.29	2190.03	2193.51	2033.45	2045.77	1901.19	1764.8	1634.82	1545.8	1461.03	1394.76	1338.91	1293.59	1245.81	1198.92	1153.61	1117.35	1105.14	1093.31	1081.14	1067.7	1066.3	1061.57	1047.42	1033.73	939.475	938.418	934.339	933.171	941.96	932.252	941.186	944.688	950.968	954.955	960.521	953.609	950.148	940.349
24 Slovenia	49.5723	50.6419	51.8849	49.607	48.5596	50.0723	50.2627	45.7703	45.0042	34.2502	36.1088	39.4345	39.5008	35.8928	35.5553	32.4261	29.5688	26.9332	25.0866	23.3726	22.0172	20.8713	19.9265	18.9677	18.0479	17.176	16.4646	16.1358	15.819	15.5029	15.174	15.0286	14.8363	14.5104	14.1972	12.7442	12.6373	12.4893	12.3837	12.4168	12.1947	12.2299	12.1901	12.1875	12.1534	12.14	11.9615	11.8308	11.6195
25 Slovakia	26.6744	23.5199	23.0585	26.1151	27.351	25.6824	25.188	23.7566	24.4641	24.2562	20.7376	18.9133	18.9342	9.0979	5.5851	3.3177	2.1798	1.5369	1.1771	0.9325	0.7697	0.653	0.5677	0.4964	0.4371	0.3876	0.3499	0.3289	0.3103	0.2934	0.2774	0.2683	0.2588	0.2461	0.2342	0.1926	0.1883	0.1834	0.1796	0.1799	0.1734	0.174	0.1724	0.1722	0.1712	0.1707	0.1666	0.1634	0.1585
26 Bulgaria	174.922	180.342	201.436	203.441	192.529	206.819	259.975	234.911	200.444	214.349	244.994	213.593	213.934	197.768	198.504	183.987	170.36	157.44	148.546	140.111	133.498	127.917	123.37	118.609	113.955	109.471	105.866	104.561	103.297	102.005	100.598	100.334	99.7556	98.2917	96.8758	87.8918	87.6899	87.2051	86.9943	87.7156	86.7057	87.4391	87.6633	88.1454	88.4123	88.8249	88.0774	87.6522	86.6411
27 Romania	242.556	271.213	287.137	291.449	274.796	247.142	278.92	265.682	194.955	186.257	197.245	177.268	177.555	163.351	163.369	150.736	138.973	127.91	120.247	113.026	107.346	102.546	98.6173	94.544	90.5844	86.7878	83.7193	82.5036	81.3271	80.1345	78.8573	78.4912	77.8787	76.571	75.308	68.1163	67.8381	67.34	67.0577	67.502	66.5981	67.0511	67.1069	67.3617	67.4485	67.647	66.951	66.5059	65.6133
28 Norway	41.3351	67.2995	114.451	96.383	74.2121	54.3735	38.9466	34.5349	52.1255	47.0675	31.0786	22.9858	23.0239	21.0407	20.9196	19.1806	17.5792	16.0896	15.0485	14.0759	13.3073	12.6568	12.1213	11.5735	11.0452	10.5421	10.1324	9.9518	9.7773	9.6023	9.4186	9.3456	9.2437	9.0594	8.882	8.0026	7.9482	7.8681	7.8139	7.8453	7.7185	7.751	7.7369	7.7459	7.7353	7.7376	7.6366	7.5651	7.4427
29 Switzerland	0	0	0	0	0	0	0	0	0	0	0	0	0	0	0	0	0	0	0	0	0	0	0	0	0	0	0	0	0	0	0	0	0	0	0	0	0	0	0	0	0	0	0	0	0	0	0	0	0
30 Iceland	0	0	0	0	0	0	0	0	0	0	0	0	0	0	0	0	0	0	0	0	0	0	0	0	0	0	0	0	0	0	0	0	0	0	0	0	0	0	0	0	0	0	0	0	0	0	0	0	0
31 Croatia	0	0	0	0	0	0	0	0	0	0	0	0	0	0	0	0	0	0	0	0	0	0	0	0	0	0	0	0	0	0	0	0	0	0	0	0	0	0	0	0	0	0	0	0	0	0	0	0	0
32 Turkey	442.744	542.11	628.418	685.518	700.789	700.903	695.852	651.228	566.957	578.352	535.846	648.854	650.035	575.199	560.57	498.859	444.577	396.292	362.466	331.915	307.876	287.724	271.13	254.77	239.399	225.097	213.404	207.309	201.485	195.767	189.971	186.748	182.936	177.402	172.128	152.13	149.899	147.166	145.004	144.614	141.011	140.665	139.377	138.556	137.347	136.395	133.446	131.112	127.843
33 Macedonia	0	0	0	0	0	0	0	0	0	0	0	0	0	0	0	0	0	0	0	0	0	0	0	0	0	0	0	0	0	0	0	0	0	0	0	0	0	0	0	0	0	0	0	0	0	0	0	0	0
34 USA	23667.2	24181.5	23801.8	24254.1	22195.7	22267.1	22456.4	20745	19978.8	20307.3	18056.9	14589.5	14612.8	13554.9	13646.9	12689.9	11785.9	10923.4	10333.7	9771.68	9332.76	8963.08	8663.5	8347.02	8036.15	7735.48	7495.24	7416.33	7339.88	7261.01	7173.56	7167.04	7138.06	7045.63	6956.17	6323.67	6318.81	6293.56	6287.92	6349.46	6286.21	6348.77	6374.7	6419.43	6448.7	6488.69	6444.31	6423.23	6359.23
35 Japan	27.1264	29.3437	27.7818	28.0143	26.196	24.8631	25.9558	27.0698	30.5179	32.1598	30.8628	31.4259	31.4761	29.1892	29.383	27.3153	25.363	23.5011	22.2278	21.0146	20.067	19.269	18.622	17.939	17.2683	16.6197	16.1013	15.9301	15.7643	15.5932	15.4038	15.3884	15.3248	15.1248	14.9312	13.5707	13.5591	13.5038	13.4907	13.6218	13.4849	13.6182	13.6728	13.7678	13.8295	13.9143	13.8179	13.7715	13.633
36 Canada	1446.67	1450.18	1554.77	1411.55	1288.91	1421.22	1413.34	1407.17	1472.57	1453.85	1288.31	1257.04	1259.04	1167.61	1175.19	1092.53	1014.49	940.068	889.144	840.628	802.723	770.79	744.896	717.565	690.73	664.782	644.037	637.153	630.484	623.61	616.003	615.344	612.758	604.731	596.961	542.623	542.128	539.885	539.324	544.522	539.022	544.306	546.449	550.202	552.629	555.972	552.09	550.204	544.645
37 Australia	8439.69	8533.05	9000.75	9039.73	9350.5	10323.1	9782.07	10272.4	11074.8	11950.8	12501	12226.8	12246.3	11356.1	11429.3	10624.6	9864.99	9140.68	8645.02	8172.85	7803.93	7493.12	7241.07	6975.07	6713.92	6461.43	6259.55	6192.43	6127.41	6060.41	5986.28	5979.7	5954.39	5876.19	5800.51	5272.23	5267.27	5245.34	5239.75	5290.13	5236.54	5287.75	5308.43	5344.76	5368.2	5400.55	5362.67	5344.21	5290.06
38 New Zealand	132.462	142.527	118.567	118.784	111.111	131.361	121.159	120.698	114.687	97.9343	81.024	68.3284	68.4395	63.3296	63.7064	59.1022	54.7693	50.6506	47.8326	45.1543	43.0623	41.3007	39.8718	38.3677	36.8935	35.4705	34.3321	33.946	33.572	33.1874	32.7637	32.7158	32.5639	32.1185	31.6876	28.7492	28.713	28.5828	28.5432	28.8131	28.508	28.7823	28.8878	29.0796	29.2001	29.3696	29.1513	29.0403	28.7325
39 Russian Federation	6574.68	6657.81	6809.95	6991.92	6423.52	6954.53	6875.74	7738.53	7700.05	7932.73	8375.27	8745.14	8759.08	8124.8	8179.36	7605.64	7063.73	6546.72	6193.16	5856.2	5593.03	5371.36	5191.69	5001.92	4815.53	4635.26	4491.2	4443.77	4397.82	4350.43	4297.9	4293.83	4276.32	4220.82	4167.1	3788.25	3785.21	3769.97	3766.47	3803.2	3765.2	3802.53	3817.93	3844.58	3861.97	3885.78	3859.08	3846.34	3807.9
40 Rest of Annex I	0	0	0	0	0	0	0	0	0	0	0	0	0	0	0	0	0	0	0	0	0	0	0	0	0	0	0	0	0	0	0	0	0	0	0	0	0	0	0	0	0	0	0	0	0	0	0	0	0
41 China	51373.4	55862.4	60779.1	62263	65631.7	72117.2	78026.3	77583.2	79317.4	79620.1	78826.4	71967.1	72083.9	66402.6	66511.8	61442.5	56710.1	52248	49167.3	46258.1	43973.9	42045.6	40470.9	38832.2	37236.1	35703.2	34467.5	33995.1	33537.8	33072.7	32571.4	32447	32219.9	31703.5	31204.5	28237.9	28143.1	27956.5	27859.5	28065.4	27709	27918.6	27962.7	28090	28147.4	28251.6	27981	27815.2	27461.2
42 India	6837.39	7152.76	7584.26	8182.75	8868.59	8912.63	9292.77	9800.64	9933.98	10605.7	11034.7	11223.6	11241.8	10388.6	10435.3	9668.84	8949.36	8267.15	7798.78	7354.53	7006.81	6713.7	6475.34	6225.39	5980.94	5745.35	5556.34	5489.31	5424.39	5357.91	5285.26	5273.32	5244.66	5168.84	5095.52	4619.61	4610.51	4586.34	4576.74	4616.74	4564.6	4605.25	4618.83	4646.16	4662.05	4685.73	4647.52	4626.49	4574.16
43 Mexico	296.45	336.364	357.051	318.329	276.83	335.186	434.123	332.631	321.405	324.566	241.761	291.395	291.869	269.386	270.33	250.183	231.31	213.452	201.169	189.537	180.424	172.738	166.479	159.934	153.542	147.39	142.446	140.643	138.898	137.114	135.176	134.797	133.989	131.976	130.029	117.792	117.503	116.829	116.528	117.492	116.106	117.087	117.376	118.016	118.363	118.907	117.877	117.285	115.898
44 Brazil	103.971	95.7789	98.3746	111.406	93.7561	88.1214	89.34	105.389	138.101	128.119	128.386	110.353	110.532	102.311	102.937	95.5248	88.5455	81.9077	77.3675	73.0506	69.6793	66.8407	64.5388	62.1142	59.7371	57.4418	55.6061	54.9872	54.3877	53.7709	53.0905	53.0184	52.7779	52.0621	51.3694	46.6152	46.5607	46.354	46.294	46.7355	46.2453	46.6941	46.8692	47.1844	47.3839	47.6632	47.3137	47.138	46.6432
45 Argentina	0.6176	3.483	2.7172	3.977	2.0256	1.6056	2.2232	2.3467	2.0503	1.408	0.8399	0.5681	0.569	0.5268	0.5306	0.4925	0.4566	0.4224	0.3991	0.3769	0.3596	0.3451	0.3333	0.3209	0.3087	0.2969	0.2875	0.2845	0.2815	0.2784	0.275	0.2748	0.2737	0.2701	0.2666	0.2419	0.2417	0.2407	0.2405	0.2429	0.2405	0.2429	0.244	0.2457	0.2469	0.2484	0.2467	0.2459	0.2434
46 Colombia	1607.37	1785.13	1902.31	2000.28	1981.37	2023.36	2335.04	2422.7	2326.69	2410.56	2328.1	2463.19	2467.66	2238.97	2231.45	2032.27	1850.19	1682	1566.24	1458.58	1374.4	1303.73	1246.08	1187.01	1130.13	1076.07	1032.48	1014.45	997.061	979.546	960.989	954.785	945.29	926.529	908.472	812.092	807.55	800.131	795.565	800.516	787.824	792.876	792.728	795.162	795.394	797.069	787.118	780.456	768.038
47 Rest of Latin America	232.449	227.587	193.982	165.59	119.622	96.6329	79.2346	55.2204	85.5831	112.849	85.3175	72.6889	72.8058	67.4835	67.9365	63.1268	58.5883	54.2623	51.3056	48.4898	46.2914	44.4405	42.9407	41.3574	39.803	38.3003	37.0998	36.7037	36.32	35.9243	35.4861	35.4511	35.3042	34.8414	34.3935	31.2437	31.2175	31.0899	31.0599	31.3639	31.0474	31.3564	31.4833	31.7037	31.8472	32.0439	31.8211	31.7143	31.3941
48 Korea	52.7828	52.6337	55.5815	53.4052	48.5134	40.1358	40.1358	39.0133	33.8153	32.567	32.8651	32.1571	32.2093	29.8073	29.9803	27.8159	25.7787	23.842	22.5162	21.256	20.2714	19.4421	18.7692	18.061	17.3669	16.6969	16.1608	15.9782	15.8013	15.6195	15.4193	15.3958	15.3233	15.1131	14.9096	13.5282	13.5104	13.4484	13.429	13.5549	13.4107	13.5388	13.5874	13.6767	13.7324	13.8111	13.7077	13.6548	13.5094
49 Taiwan	0	0	0	0	0	0	0	0	0	0	0	0	0.0014	0.0013	0.0013	0.0012	0.0011	0.0011	0.001	0.0009	0.0009	0.0009	0.0008	0.0008	0.0008	0.0007	0.0007	0.0007	0.0007	0.0007	0.0007	0.0007	0.0007	0.0007	0.0007	0.0006	0.0006	0.0006	0.0006	0.0006	0.0006	0.0006	0.0006	0.0006	0.0006	0.0006	0.0006	0.0006	0.0006
50 Indonesia	4112.72	5655.12	6011.83	5966.3	6983.67	7800.58	9752.54	10373.1	11243.9	11125	10260.5	10419	10435.8	9522.34	9448.47	8650.72	7918.13	7238.65	6762.05	6317.82	5966.07	5668.17	5422.38	5171.93	4930.94	4701.82	4514.83	4429.71	4347.58	4265.43	4179.63	4142.94	4093.55	4008.08	3925.83	3535.42	3508.13	3469.65	3442.61	3453.11	3394.37	3405.4	3396.03	3396.77	3388.93	3386.71	3339.54	3305.32	3249.07
51 Rest of ASEAN	1126.09	1202.01	1303.11	1239.68	1367.95	1438.03	1521.08	1396.42	1346.93	1341.52	1320.04	1344.97	1347.15	927.577	726.399	531.991	402.064	311.507	252.547	207.994	175.656	150.918	131.798	115.525	101.868	90.36	81.2155	75.1486	69.7528	64.8824	60.4089	57.137	53.9311	50.447	47.3003	40.2234	38.5545	36.849	35.391	34.468	32.7836	31.993	31.0121	30.1904	29.3174	28.5447	27.3597	26.3657	25.2145
52 OPEC excl Venezuela	42.3768	45.0558	45.4506	44.0604	32.2368	30.4578	32.556	29.1066	30.7218	29.9166	33.7476	37.3566	37.4166	34.6936	34.9337	32.4716	30.147	27.9302	26.4157	24.9727	23.8464	22.8983	22.1302	21.3189	20.522	19.7514	19.1359	18.9345	18.7393	18.5379	18.3145	18.2987	18.2253	17.989	17.7604	16.1389	16.1271	16.0631	16.0494	16.208	16.0465	16.2077	16.2749	16.3905	16.4663	16.5697	16.4566	16.4033	16.2398
53 Rest of world	1578.61	1625.8	1556.65	1663.28	1569.9	1855.88	2066.03	1997.29	2015.54	1958.06	1940.01	2333.66	2337.45	2162.42	2174.96	2017.31	1869	1728.06	1631.6	1539.95	1468.35	1408.06	1359.14	1307.67	1257.24	1208.56	1169.62	1156.34	1143.48	1130.27	1115.72	1113.99	1108.72	1093.44	1078.66	978.42	977.111	972.601	971.177	980.299	969.829	979.102	982.619	989.077	993.104	998.802	991.29	987.434	976.878
54 Ukraine	1445.62	1473.44	1586.39	1572.17	1458.25	1407.37	1684.65	1678.95	1703.72	1347.22	844.702	838.253	839.613	777.513	782.572	726.53	673.715	623.441	589.082	556.391	530.873	509.393	491.985	473.628	455.62	438.223	424.32	419.693	415.211	410.594	405.489	405.026	403.276	397.893	392.685	356.425	356.078	354.566	354.175	357.62	353.939	357.441	358.851	361.333	362.932	365.141	362.536	361.262	357.541
55 Saudi Arabia	0	0	0	0	0	0	0	0	0	0	0	0	0	0	0	0	0	0	0	0	0	0	0	0	0	0	0	0	0	0	0	0	0	0	0	0	0	0	0	0	0	0	0	0	0	0	0	0	0
56 Nigeria	0.2064	0.2064	0.5934	0.8256	0.8772	0.9804	0.8256	1.2384	1.1352	1.1868	1.2126	1.1868	1.1887	1.1022	1.1098	1.0316	0.9577	0.8872	0.8391	0.7932	0.7575	0.7273	0.7029	0.6771	0.6518	0.6273	0.6078	0.6014	0.5952	0.5888	0.5817	0.5812	0.5788	0.5713	0.5641	0.5125	0.5122	0.5101	0.5097	0.5147	0.5096	0.5147	0.5169	0.5206	0.523	0.5263	0.5227	0.521	0.5158
57 South Africa	5793.07	5787.65	5861.55	5967.8	5899.53	6026.65	5975.54	6113.18	6072.3	6171.87	6051.29	6052.21	6063.17	5508.61	5496.81	5012.37	4568.5	4157.57	3875.17	3612.09	3406.54	3233.99	3093.39	2948.95	2809.66	2677.1	2570.35	2527.08	2485.3	2443.15	2398.33	2384.27	2361.97	2316.48	2272.67	2032.8	2022.48	2004.95	1994.53	2007.97	1977.17	1990.86	1991.51	1998.66	2000.29	2005.55	1981.57	1965.83	1935.57
58 Rest of Africa	101.815	97.0778	91.8953	69.4904	78.1885	80.0298	98.2088	208.911	235.21	330.445	301.441	216.27	216.615	200.908	202.25	188.045	174.63	161.833	153.081	144.741	138.227	132.741	128.294	123.598	118.985	114.525	110.96	109.785	108.646	107.472	106.171	106.068	105.633	104.258	102.928	93.5618	93.4848	93.1061	93.0178	93.9234	92.9826	93.9032	94.2817	94.9384	95.3662	95.9525	95.2908	94.9739	94.0223
59 Africa OPEC	0	0	0	0	0	0	0	0	0	0	0	0	0.0036	0.0033	0.0033	0.0031	0.0029	0.0027	0.0025	0.0024	0.0023	0.0022	0.0021	0.002	0.002	0.0019	0.0018	0.0018	0.0018	0.0018	0.0017	0.0017	0.0017	0.0017	0.0017	0.0015	0.0015	0.0015	0.0015	0.0015	0.0015	0.0015	0.0015	0.0016	0.0016	0.0016	0.0016	0.0016	0.0015
60 Malaysia	20.7985	23.781	28.3736	33.0981	56.4304	63.2664	76.9649	77.8623	76.3842	70.9207	67.5423	59.6241	59.7199	55.2069	55.4335	51.3792	47.5724	43.962	41.4797	39.1251	37.2803	35.7242	34.4575	33.1301	31.8319	30.5809	29.5763	29.2164	28.8677	28.511	28.1219	28.0534	27.8968	27.4913	27.0991	24.581	24.5287	24.397	24.3422	24.5493	24.2699	24.4804	24.5479	24.6879	24.7675	24.8882	24.6824	24.5673	24.2872
61 Kazakhstan	1602.89	1777.85	1800.58	2045.07	1854	2032.57	2130.9	2209.09	2195.53	2090.88	1972.39	1892.64	1895.68	1756.35	1767.31	1641.52	1522.92	1409.98	1332.69	1259.13	1201.67	1153.27	1114.01	1072.63	1032.02	992.794	961.419	950.902	940.712	930.221	918.636	917.489	913.451	901.247	889.437	807.804	806.939	803.455	802.493	810.159	801.797	809.588	812.674	818.169	821.677	826.556	820.615	817.666	809.221
0	Dan_2C_SO_covid_S3
RERY	Primary energy supply (before trade), PJ, NER x NR
	2005	2006	2007	2008	2009	2010	2011	2012	2013	2014	2015	2016	2017	2018	2019	2020	2021	2022	2023	2024	2025	2026	2027	2028	2029	2030	2031	2032	2033	2034	2035	2036	2037	2038	2039	2040	2041	2042	2043	2044	2045	2046	2047	2048	2049	2050	2051	2052	2053
1 Belgium	2.3944	0.6371	0	0	0	0.3626	0.3173	0.4533	0.476	0.4306	0.34	0.3173	0.3178	0.2713	0.2752	0.2363	0.2025	0.1729	0.1542	0.1373	0.125	0.115	0.1073	0.0994	0.0923	0.0852	0.0798	0.0781	0.0765	0.0749	0.073	0.073	0.0723	0.0705	0.0687	0.0566	0.0566	0.0561	0.056	0.0572	0.056	0.0572	0.0576	0.0585	0.0591	0.0598	0.0589	0.0586	0.0574
2 Denmark	0	0	0	0	0	0	0	0	0	0	0	0	0.0069	0.0064	0.0064	0.006	0.0055	0.0051	0.0048	0.0046	0.0044	0.0042	0.004	0.0039	0.0037	0.0036	0.0035	0.0034	0.0034	0.0034	0.0033	0.0033	0.0033	0.0033	0.0032	0.0029	0.0029	0.0029	0.0029	0.0029	0.0029	0.0029	0.003	0.003	0.003	0.003	0.003	0.003	0.0029
3 Germany	2363.79	2228.23	2276.17	2095.79	1942.03	1921.99	1955.12	1992.76	1886.35	1847.75	1800.49	1663.2	1666	1538.61	1548.84	1434.24	1326.53	1224.25	1154.53	1088.39	1036.9	993.576	958.551	921.638	886.652	850.751	822.773	813.402	804.44	795.209	784.711	784.01	780.393	769.756	759.4	687.361	686.679	683.744	682.931	689.776	682.442	689.376	692.123	697.004	700.111	704.47	699.181	696.626	689.181
4 Greece	357.469	342.075	351.233	340.364	342.311	306.282	314.215	336.815	281.699	267.292	237.612	166.323	166.818	141.448	142.989	122.023	103.993	88.3199	78.4185	69.5838	63.1026	57.9012	53.8652	49.7807	46.0745	42.4212	39.6763	38.7816	37.8962	37.0509	36.0745	36.0072	35.6634	34.7025	33.7738	27.7147	27.6786	27.4302	27.3705	27.9124	27.3253	27.8664	28.061	28.4699	28.7204	29.0499	28.5974	28.4043	27.8141
5 Spain	262.293	253.256	228.451	175.603	159.555	138.013	110.896	103.026	73.8064	68.1698	52.1725	30.8225	30.8723	28.6011	28.7905	26.7395	24.8044	22.9597	21.6991	20.5001	19.5646	18.7763	18.1383	17.4644	16.8246	16.1668	15.6536	15.4828	15.3194	15.1509	14.9589	14.9477	14.8827	14.6879	14.498	13.1646	13.1533	13.1002	13.0865	13.215	13.0801	13.2103	13.2627	13.3548	13.4139	13.4963	13.3995	13.3534	13.2165
6 France	16.042	11.752	10.972	7.202	3.822	6.786	3.874	7.54	8.138	7.8	0	0	0.0022	0.002	0.002	0.0019	0.0018	0.0016	0.0016	0.0015	0.0014	0.0013	0.0013	0.0013	0.0012	0.0012	0.0011	0.0011	0.0011	0.0011	0.0011	0.0011	0.0011	0.0011	0.001	0.001	0.001	0.0009	0.0009	0.001	0.0009	0.001	0.001	0.001	0.001	0.001	0.001	0.001	0.001
7 Ireland	0	0	0	0	0	0	0	0	0	0	0	0	0.0007	0.0006	0.0006	0.0006	0.0005	0.0005	0.0005	0.0004	0.0004	0.0004	0.0004	0.0004	0.0004	0.0004	0.0003	0.0003	0.0003	0.0003	0.0003	0.0003	0.0003	0.0003	0.0003	0.0003	0.0003	0.0003	0.0003	0.0003	0.0003	0.0003	0.0003	0.0003	0.0003	0.0003	0.0003	0.0003	0.0003
8 Italy	2.5258	0.5583	4.2007	3.1107	1.9142	2.6853	2.446	2.127	1.9408	2.2865	2.1536	0	0.0084	0.0078	0.0079	0.0073	0.0068	0.0063	0.006	0.0057	0.0054	0.0052	0.005	0.0048	0.0047	0.0045	0.0043	0.0043	0.0043	0.0042	0.0042	0.0042	0.0041	0.0041	0.004	0.0037	0.0037	0.0037	0.0036	0.0037	0.0036	0.0037	0.0037	0.0037	0.0037	0.0038	0.0037	0.0037	0.0037
9 Luxembourg	0	0	0	0	0	0	0	0	0	0	0	0	0	0	0	0	0	0	0	0	0	0	0	0	0	0	0	0	0	0	0	0	0	0	0	0	0	0	0	0	0	0	0	0	0	0	0	0	0
10 Netherlands	0	0	0	0	0	0	0	0	0	0	0	0	0.049	0.0454	0.0457	0.0425	0.0394	0.0365	0.0345	0.0327	0.0312	0.0299	0.0289	0.0279	0.0269	0.0258	0.025	0.0247	0.0245	0.0242	0.0239	0.0239	0.0238	0.0235	0.0232	0.0211	0.0211	0.021	0.021	0.0212	0.021	0.0212	0.0213	0.0214	0.0215	0.0217	0.0215	0.0214	0.0212
11 Austria	0	0	0	0	0	0	0	0	0	0	0	0	0	0	0	0	0	0	0	0	0	0	0	0	0	0	0	0	0	0	0	0	0	0	0	0	0	0	0	0	0	0	0	0	0	0	0	0	0
12 Portugal	0	0	0	0	0	0	0	0	0	0	0	0	0	0	0	0	0	0	0	0	0	0	0	0	0	0	0	0	0	0	0	0	0	0	0	0	0	0	0	0	0	0	0	0	0	0	0	0	0
13 Finland	0	0	0	0	0	0	0	0	0	0	0	0	0	0	0	0	0	0	0	0	0	0	0	0	0	0	0	0	0	0	0	0	0	0	0	0	0	0	0	0	0	0	0	0	0	0	0	0	0
14 Sweden	0	0	0	0	0	0	0	0	0	0	0	0	0.0001	0.0001	0.0001	0.0001	0.0001	0.0001	0.0001	0.0001	0	0	0	0	0	0	0	0	0	0	0	0	0	0	0	0	0	0	0	0	0	0	0	0	0	0	0	0	0
15 UK	505.18	453.668	425.083	449.323	438.56	453.869	458.007	420.337	317.05	289.907	214.153	104.725	104.891	97.3291	97.9975	91.1535	84.6817	78.499	74.2716	70.2445	67.1013	64.451	62.306	60.0366	57.8798	55.659	53.9272	53.3575	52.8126	52.25	51.6068	51.5788	51.3674	50.7137	50.0767	45.5373	45.5068	45.3332	45.2942	45.7411	45.2883	45.7411	45.9283	46.2511	46.4614	46.7513	46.4287	46.2795	45.8192
16 Czech Republic	986.828	999.037	996.626	953.968	873.085	871.947	879.324	848.802	744.039	710.876	708	674.892	675.968	623.316	624.064	577.048	533.092	491.577	462.85	435.727	414.408	396.373	381.641	366.3	351.801	337.055	325.413	320.902	316.576	312.179	307.334	306.201	303.981	299.151	294.459	266.797	265.871	264.111	263.148	265.023	261.647	263.548	263.893	265.014	265.476	266.388	263.783	262.185	258.826
17 Estonia	0	0	0	0	0	0	0	0	0	0	0	0	0	0	0	0	0	0	0	0	0	0	0	0	0	0	0	0	0	0	0	0	0	0	0	0	0	0	0	0	0	0	0	0	0	0	0	0	0
18 Cyprus	0	0	0	0	0	0	0	0	0	0	0	0	0	0	0	0	0	0	0	0	0	0	0	0	0	0	0	0	0	0	0	0	0	0	0	0	0	0	0	0	0	0	0	0	0	0	0	0	0
19 Latvia	0	0	0	0	0	0	0	0	0	0	0	0	0	0	0	0	0	0	0	0	0	0	0	0	0	0	0	0	0	0	0	0	0	0	0	0	0	0	0	0	0	0	0	0	0	0	0	0	0
20 Lithuania	0	0	0	0	0	0	0	0	0	0	0	0	0	0	0	0	0	0	0	0	0	0	0	0	0	0	0	0	0	0	0	0	0	0	0	0	0	0	0	0	0	0	0	0	0	0	0	0	0
21 Hungary	73.1914	73.5453	74.2241	70.9062	65.1485	66.7072	68.8915	67.2596	67.4795	66.4845	63.5675	61.2311	61.3343	55.6648	55.1901	50.2764	45.7928	41.6589	38.7739	36.0993	33.9907	32.2094	30.7452	29.2567	27.8663	26.4799	25.3738	24.8699	24.3878	23.9063	23.395	23.188	22.8963	22.4008	21.9224	19.6529	19.4963	19.2765	19.1202	19.1831	18.8435	18.909	18.8553	18.8606	18.8157	18.8045	18.5302	18.3339	18.0091
22 Malta	0	0	0	0	0	0	0	0	0	0	0	0	0	0	0	0	0	0	0	0	0	0	0	0	0	0	0	0	0	0	0	0	0	0	0	0	0	0	0	0	0	0	0	0	0	0	0	0	0
23 Poland	2882.9	2828.52	2616.28	2550.2	2362.09	2318.7	2332.85	2420.78	2392.16	2262.29	2255.29	2190.03	2193.51	2033.45	2045.77	1901.19	1764.72	1634.57	1545.42	1460.61	1394.34	1338.44	1293.12	1245.3	1199.89	1153.21	1116.75	1104.41	1092.6	1080.45	1066.64	1065.57	1060.72	1046.73	1033.1	938.924	937.912	933.951	932.767	941.602	931.887	940.836	944.306	950.561	954.495	960.06	953.029	949.569	939.723
24 Slovenia	49.5723	50.6419	51.8849	49.607	48.5596	50.0723	50.2627	45.7703	45.0042	34.2502	36.1088	39.4345	39.5008	35.8928	35.5553	32.4261	29.5674	26.9289	25.0804	23.3657	22.0105	20.8638	19.9193	18.9599	18.0635	17.1701	16.4556	16.125	15.8088	15.4931	15.1589	15.0186	14.8246	14.5011	14.1889	12.7373	12.6311	12.4848	12.3791	12.4129	12.1907	12.2262	12.186	12.1831	12.1484	12.1351	11.955	11.8245	11.6127
25 Slovakia	26.6744	23.5199	23.0585	26.1151	27.351	25.6824	25.188	23.7566	24.4641	24.2562	20.7376	18.9133	18.9342	9.0979	5.5851	3.3177	2.1797	1.5364	1.1769	0.9321	0.7696	0.6529	0.5676	0.4961	0.4379	0.3876	0.3496	0.3286	0.3097	0.2931	0.277	0.2683	0.2585	0.2458	0.2342	0.1923	0.1882	0.1832	0.1797	0.1796	0.1734	0.1737	0.1722	0.172	0.1712	0.1707	0.166	0.1632	0.1582
26 Bulgaria	174.922	180.342	201.436	203.441	192.529	206.819	259.975	234.911	200.444	214.349	244.994	213.593	213.934	197.768	198.504	183.987	170.353	157.415	148.51	140.071	133.458	127.871	123.326	118.561	114.047	109.433	105.809	104.492	103.231	101.94	100.498	100.266	99.6758	98.2269	96.817	87.841	87.6434	87.1697	86.9575	87.6832	86.6727	87.4076	87.6289	88.1087	88.3708	88.7834	88.0249	87.6	86.5847
27 Romania	242.556	271.213	287.137	291.449	274.796	247.142	278.92	265.682	194.955	186.257	197.245	177.268	177.555	163.351	163.369	150.736	138.967	127.89	120.218	112.993	107.313	102.509	98.5817	94.5053	90.6591	86.7579	83.6737	82.4488	81.2744	80.0836	78.7791	78.4382	77.8166	76.521	75.2629	68.0776	67.803	67.3136	67.0302	67.4781	66.5738	67.0281	67.0818	67.3349	67.4181	67.6166	66.9123	66.4675	65.5718
28 Norway	41.3351	67.2995	114.451	96.383	74.2121	54.3735	38.9466	34.5349	52.1255	47.0675	31.0786	22.9858	23.0239	21.0407	20.9196	19.1806	17.5784	16.0871	15.0448	14.0718	13.3033	12.6524	12.117	11.5688	11.0545	10.5384	10.127	9.9452	9.7711	9.5963	9.4093	9.3394	9.2364	9.0537	8.8768	7.9983	7.9442	7.8652	7.8109	7.8427	7.7159	7.7485	7.7342	7.7431	7.732	7.7343	7.6324	7.561	7.4383
29 Switzerland	0	0	0	0	0	0	0	0	0	0	0	0	0	0	0	0	0	0	0	0	0	0	0	0	0	0	0	0	0	0	0	0	0	0	0	0	0	0	0	0	0	0	0	0	0	0	0	0	0
30 Iceland	0	0	0	0	0	0	0	0	0	0	0	0	0	0	0	0	0	0	0	0	0	0	0	0	0	0	0	0	0	0	0	0	0	0	0	0	0	0	0	0	0	0	0	0	0	0	0	0	0
31 Croatia	0	0	0	0	0	0	0	0	0	0	0	0	0	0	0	0	0	0	0	0	0	0	0	0	0	0	0	0	0	0	0	0	0	0	0	0	0	0	0	0	0	0	0	0	0	0	0	0	0
32 Turkey	442.744	542.11	628.418	685.518	700.789	700.903	695.852	651.228	566.957	578.352	535.846	648.854	650.035	575.199	560.57	498.859	444.555	396.223	362.369	331.81	307.777	287.616	271.028	254.662	239.63	225.017	213.281	207.164	201.348	195.64	189.774	186.623	182.79	177.291	172.032	152.051	149.832	147.121	144.958	144.577	140.974	140.632	139.341	138.517	137.3	136.35	133.383	131.051	127.777
33 Macedonia	0	0	0	0	0	0	0	0	0	0	0	0	0	0	0	0	0	0	0	0	0	0	0	0	0	0	0	0	0	0	0	0	0	0	0	0	0	0	0	0	0	0	0	0	0	0	0	0	0
34 USA	23667.2	24181.5	23801.8	24254.1	22195.7	22267.1	22456.4	20745	19978.8	20307.3	18056.9	14589.5	14612.8	13554.9	13646.9	12689.9	11785.4	10921.7	10331.2	9768.86	9329.95	8959.89	8660.35	8343.59	8042.61	7732.79	7491.16	7411.4	7335.11	7256.36	7166.42	7162.12	7132.29	7040.92	6951.87	6319.94	6315.37	6290.91	6285.17	6347.02	6283.72	6346.38	6372.09	6416.65	6445.57	6485.54	6440.36	6419.29	6354.96
35 Japan	27.1264	29.3437	27.7818	28.0143	26.196	24.8631	25.9558	27.0698	30.5179	32.1598	30.8628	31.4259	31.4761	29.1892	29.383	27.3153	25.3619	23.4975	22.2224	21.0085	20.061	19.2621	18.6153	17.9316	17.2821	16.6139	16.0926	15.9195	15.754	15.5833	15.3885	15.3779	15.3124	15.1146	14.9219	13.5626	13.5518	13.4982	13.4848	13.6166	13.4795	13.6131	13.6672	13.7618	13.8228	13.9075	13.8094	13.7631	13.6239
36 Canada	1446.67	1450.18	1554.77	1411.55	1288.91	1421.22	1413.34	1407.17	1472.57	1453.85	1288.31	1257.04	1259.04	1167.61	1175.19	1092.53	1014.45	939.922	888.929	840.386	802.482	770.516	744.626	717.271	691.284	664.552	643.687	636.73	630.074	623.211	615.391	614.922	612.264	604.327	596.593	542.304	541.834	539.659	539.089	544.313	538.81	544.102	546.226	549.964	552.361	555.704	551.752	549.867	544.28
37 Australia	8439.69	8533.05	9000.75	9039.73	9350.5	10323.1	9782.07	10272.4	11074.8	11950.8	12501	12226.8	12246.3	11356.1	11429.3	10624.6	9864.55	9139.27	8642.93	8170.5	7801.58	7490.45	7238.44	6972.21	6719.31	6459.19	6256.14	6188.32	6123.43	6056.53	5980.33	5975.6	5949.59	5872.27	5796.93	5269.12	5264.42	5243.15	5237.47	5288.1	5234.48	5285.77	5306.27	5342.46	5365.6	5397.94	5359.4	5340.94	5286.52
38 New Zealand	132.462	142.527	118.567	118.784	111.111	131.361	121.159	120.698	114.687	97.9343	81.024	68.3284	68.4395	63.3296	63.7064	59.1022	54.7669	50.6426	47.8208	45.141	43.0491	41.2858	39.8572	38.3517	36.9237	35.458	34.3131	33.9231	33.5498	33.1659	32.7306	32.6931	32.5373	32.0968	31.6679	28.7321	28.6973	28.5708	28.5307	28.802	28.4967	28.7715	28.8759	29.067	29.1858	29.3553	29.1333	29.0224	28.7131
39 Russian Federation	6574.68	6657.81	6809.95	6991.92	6423.52	6954.53	6875.74	7738.53	7700.05	7932.73	8375.27	8745.14	8759.08	8124.8	8179.36	7605.64	7063.42	6545.71	6191.66	5854.52	5591.35	5369.45	5189.8	4999.86	4819.39	4633.65	4488.76	4440.82	4394.96	4347.64	4293.62	4290.89	4272.87	4218	4164.53	3786.02	3783.16	3768.39	3764.83	3801.73	3763.71	3801.1	3816.37	3842.91	3860.09	3883.89	3856.71	3843.97	3805.35
40 Rest of Annex I	0	0	0	0	0	0	0	0	0	0	0	0	0	0	0	0	0	0	0	0	0	0	0	0	0	0	0	0	0	0	0	0	0	0	0	0	0	0	0	0	0	0	0	0	0	0	0	0	0
41 China	51373.4	55862.4	60779.1	62263	65631.7	72117.2	78026.3	77583.2	79317.4	79620.1	78826.4	71967.1	72083.9	66402.6	66511.8	61442.5	56707.5	52239.7	49155.2	46244.7	43960.6	42030.6	40456.2	38816.2	37266.8	35690.8	34448.6	33972.4	33515.9	33051.5	32538.9	32424.8	32194	31682.5	31185.6	28221.6	28128.2	27945.3	27847.9	28055.2	27698.6	27908.8	27951.9	28078.5	28134.3	28238.5	27964.5	27798.8	27443.4
42 India	6837.39	7152.76	7584.26	8182.75	8868.59	8912.63	9292.77	9800.64	9933.98	10605.7	11034.7	11223.6	11241.8	10388.6	10435.3	9668.84	8948.96	8265.86	7796.87	7352.38	7004.68	6711.29	6472.96	6222.81	5985.83	5743.34	5553.29	5485.63	5420.84	5354.46	5279.96	5269.68	5240.4	5165.38	5092.37	4616.9	4608.02	4584.45	4574.77	4614.99	4562.82	4603.56	4616.98	4644.19	4659.82	4683.5	4644.7	4623.68	4571.12
43 Mexico	296.45	336.364	357.051	318.329	276.83	335.186	434.123	332.631	321.405	324.566	241.761	291.395	291.869	269.386	270.33	250.183	231.299	213.418	201.119	189.482	180.369	172.676	166.418	159.867	153.668	147.338	142.368	140.549	138.807	137.026	135.041	134.704	133.881	131.888	129.949	117.723	117.44	116.781	116.478	117.448	116.061	117.044	117.33	117.966	118.307	118.851	117.806	117.215	115.822
44 Brazil	103.971	95.7789	98.3746	111.406	93.7561	88.1214	89.34	105.389	138.101	128.119	128.386	110.353	110.532	102.311	102.937	95.5248	88.5415	81.8948	77.3485	73.0293	69.658	66.8166	64.515	62.0883	59.7858	57.4216	55.5755	54.9502	54.3519	53.736	53.037	52.9816	52.7348	52.0269	51.3374	46.5874	46.5352	46.3344	46.2736	46.7174	46.2269	46.6764	46.85	47.1638	47.3608	47.6399	47.2844	47.1089	46.6117
45 Argentina	0.6176	3.483	2.7172	3.977	2.0256	1.6056	2.2232	2.3467	2.0503	1.408	0.8399	0.5681	0.569	0.5268	0.5306	0.4925	0.4566	0.4223	0.399	0.3768	0.3595	0.345	0.3332	0.3208	0.309	0.2968	0.2874	0.2843	0.2813	0.2782	0.2747	0.2746	0.2734	0.2699	0.2664	0.2417	0.2416	0.2406	0.2404	0.2428	0.2404	0.2428	0.2439	0.2456	0.2467	0.2483	0.2466	0.2458	0.2433
46 Colombia	1607.37	1785.13	1902.31	2000.28	1981.37	2023.36	2335.04	2422.7	2326.69	2410.56	2328.1	2463.19	2467.66	2238.97	2231.45	2032.27	1850.1	1681.71	1565.81	1458.11	1373.94	1303.22	1245.58	1186.48	1131.17	1075.66	1031.86	1013.71	996.355	978.868	959.944	954.084	944.47	925.875	907.886	811.598	807.102	799.802	795.223	800.221	787.524	792.594	792.419	794.832	795.018	796.694	786.638	779.981	767.524
47 Rest of Latin America	232.449	227.587	193.982	165.59	119.622	96.6329	79.2346	55.2204	85.5831	112.849	85.3175	72.6889	72.8058	67.4835	67.9365	63.1268	58.5856	54.2539	51.2931	48.4757	46.2774	44.4246	42.9249	41.3403	39.8352	38.287	37.0794	36.6791	36.2962	35.9012	35.4506	35.4266	35.2755	34.8179	34.3721	31.2251	31.2004	31.0768	31.0462	31.3518	31.035	31.3446	31.4704	31.6899	31.8316	32.0283	31.8015	31.6947	31.3729
48 Korea	52.7828	52.6337	55.5815	53.4052	48.5134	40.1358	40.1358	39.0133	33.8153	32.567	32.8651	32.1571	32.2093	29.8073	29.9803	27.8159	25.7775	23.8382	22.5106	21.2498	20.2652	19.4351	18.7623	18.0534	17.3811	16.6911	16.1519	15.9675	15.7909	15.6094	15.4038	15.3851	15.3108	15.1029	14.9003	13.5202	13.503	13.4427	13.4231	13.5497	13.4054	13.5337	13.5819	13.6707	13.7257	13.8044	13.6993	13.6464	13.5003
49 Taiwan	0	0	0	0	0	0	0	0	0	0	0	0	0.0014	0.0013	0.0013	0.0012	0.0011	0.0011	0.001	0.0009	0.0009	0.0009	0.0008	0.0008	0.0008	0.0007	0.0007	0.0007	0.0007	0.0007	0.0007	0.0007	0.0007	0.0007	0.0007	0.0006	0.0006	0.0006	0.0006	0.0006	0.0006	0.0006	0.0006	0.0006	0.0006	0.0006	0.0006	0.0006	0.0006
50 Indonesia	4112.72	5655.12	6011.83	5966.3	6983.67	7800.58	9752.54	10373.1	11243.9	11125	10260.5	10419	10435.8	9522.34	9448.47	8650.72	7917.78	7237.52	6760.4	6316.01	5964.3	5666.19	5420.46	5169.86	4935.06	4700.23	4512.41	4426.82	4344.82	4262.79	4175.56	4140.23	4090.38	4005.57	3923.59	3533.52	3506.43	3468.42	3441.34	3452.02	3393.27	3404.37	3394.91	3395.56	3387.55	3385.35	3337.77	3303.58	3247.18
51 Rest of ASEAN	1126.09	1202.01	1303.11	1239.68	1367.95	1438.03	1521.08	1396.42	1346.93	1341.52	1320.04	1344.97	1347.15	927.577	726.399	531.991	402.045	311.457	252.488	207.941	175.615	150.877	131.765	115.493	101.986	90.3374	81.1779	75.1056	69.7157	64.8516	60.3568	57.1118	53.9005	50.4284	47.2873	40.214	38.549	36.849	35.3911	34.4699	32.7858	31.9953	31.0132	30.191	29.3166	28.544	27.3536	26.3608	25.2083
52 OPEC excl Venezuela	42.3768	45.0558	45.4506	44.0604	32.2368	30.4578	32.556	29.1066	30.7218	29.9166	33.7476	37.3566	37.4166	34.6936	34.9337	32.4716	30.1457	27.9258	26.4092	24.9655	23.8392	22.8901	22.1221	21.3101	20.5386	19.7445	19.1255	18.9218	18.7271	18.526	18.2962	18.2861	18.2105	17.9769	17.7494	16.1293	16.1183	16.0563	16.0423	16.2017	16.0401	16.2016	16.2682	16.3833	16.4583	16.5616	16.4464	16.3931	16.2288
53 Rest of world	1578.61	1625.8	1556.65	1663.28	1569.9	1855.88	2066.03	1997.29	2015.54	1958.06	1940.01	2333.66	2337.45	2162.42	2174.96	2017.31	1868.91	1727.79	1631.2	1539.5	1467.9	1407.55	1358.64	1307.12	1258.27	1208.14	1168.97	1155.56	1142.73	1129.53	1114.59	1113.22	1107.81	1092.7	1077.99	977.837	976.576	972.191	970.75	979.921	969.445	978.734	982.217	988.648	992.62	998.316	990.678	986.824	976.219
54 Ukraine	1445.62	1473.44	1586.39	1572.17	1458.25	1407.37	1684.65	1678.95	1703.72	1347.22	844.702	838.253	839.613	777.513	782.572	726.53	673.684	623.343	588.937	556.229	530.711	509.209	491.803	473.43	455.991	438.069	424.086	419.411	414.938	410.328	405.08	404.744	402.946	397.624	392.44	356.213	355.882	354.416	354.018	357.481	353.797	357.305	358.703	361.175	362.754	364.962	362.312	361.038	357.298
55 Saudi Arabia	0	0	0	0	0	0	0	0	0	0	0	0	0	0	0	0	0	0	0	0	0	0	0	0	0	0	0	0	0	0	0	0	0	0	0	0	0	0	0	0	0	0	0	0	0	0	0	0	0
56 Nigeria	0.2064	0.2064	0.5934	0.8256	0.8772	0.9804	0.8256	1.2384	1.1352	1.1868	1.2126	1.1868	1.1887	1.1022	1.1098	1.0316	0.9577	0.8871	0.8389	0.793	0.7572	0.7271	0.7027	0.6768	0.6523	0.6271	0.6074	0.601	0.5948	0.5884	0.5811	0.5808	0.5784	0.5709	0.5637	0.5122	0.5119	0.5099	0.5095	0.5145	0.5094	0.5145	0.5167	0.5203	0.5227	0.526	0.5224	0.5207	0.5154
57 South Africa	5793.07	5787.65	5861.55	5967.8	5899.53	6026.65	5975.54	6113.18	6072.3	6171.87	6051.29	6052.21	6063.17	5508.61	5496.81	5012.37	4568.27	4156.85	3874.12	3610.93	3405.4	3232.72	3092.16	2947.63	2812.24	2676.09	2568.81	2525.23	2483.54	2441.45	2395.71	2382.51	2359.91	2314.83	2271.19	2031.56	2021.35	2004.11	1993.66	2007.21	1976.4	1990.14	1990.72	1997.82	1999.33	2004.59	1980.34	1964.62	1934.26
58 Rest of Africa	101.815	97.0778	91.8953	69.4904	78.1885	80.0298	98.2088	208.911	235.21	330.445	301.441	216.27	216.615	200.908	202.25	188.045	174.622	161.808	153.044	144.699	138.186	132.694	128.247	123.547	119.081	114.485	110.9	109.712	108.576	107.403	106.065	105.995	105.547	104.189	102.865	93.5066	93.434	93.0671	92.9771	93.8873	92.9458	93.8679	94.2432	94.8973	95.3199	95.906	95.2324	94.9156	93.9592
59 Africa OPEC	0	0	0	0	0	0	0	0	0	0	0	0	0.0036	0.0033	0.0033	0.0031	0.0029	0.0027	0.0025	0.0024	0.0023	0.0022	0.0021	0.002	0.002	0.0019	0.0018	0.0018	0.0018	0.0018	0.0017	0.0017	0.0017	0.0017	0.0017	0.0015	0.0015	0.0015	0.0015	0.0015	0.0015	0.0015	0.0015	0.0016	0.0016	0.0016	0.0016	0.0016	0.0015
60 Malaysia	20.7985	23.781	28.3736	33.0981	56.4304	63.2664	76.9649	77.8623	76.3842	70.9207	67.5423	59.6241	59.7199	55.2069	55.4335	51.3792	47.5702	43.9552	41.4696	39.1137	37.269	35.7114	34.445	33.1164	31.8578	30.5703	29.5602	29.1969	28.849	28.4928	28.0939	28.0343	27.8743	27.473	27.0825	24.5667	24.5156	24.387	24.3318	24.5401	24.2605	24.4715	24.5382	24.6776	24.7558	24.8764	24.6676	24.5525	24.2713
61 Kazakhstan	1602.89	1777.85	1800.58	2045.07	1854	2032.57	2130.9	2209.09	2195.53	2090.88	1972.39	1892.64	1895.68	1756.35	1767.31	1641.52	1522.85	1409.76	1332.36	1258.77	1201.31	1152.86	1113.6	1072.18	1032.86	992.448	960.893	950.266	940.098	929.623	917.717	916.857	912.709	900.642	888.886	807.326	806.5	803.118	802.142	809.847	801.48	809.285	812.342	817.815	821.278	826.155	820.111	817.163	808.678
0	Dan_1-5C_covid_S3
RERY	Primary energy supply (before trade), PJ, NER x NR
	2005	2006	2007	2008	2009	2010	2011	2012	2013	2014	2015	2016	2017	2018	2019	2020	2021	2022	2023	2024	2025	2026	2027	2028	2029	2030	2031	2032	2033	2034	2035	2036	2037	2038	2039	2040	2041	2042	2043	2044	2045	2046	2047	2048	2049	2050	2051	2052	2053
1 Belgium	2.3944	0.6371	0	0	0	0.3626	0.3173	0.4533	0.476	0.4306	0.34	0.3173	0.3152	0.2688	0.2727	0.2263	0.1767	0.1386	0.1097	0.0884	0.0732	0.0617	0.0536	0.0473	0.0424	0.0389	0.0356	0.0335	0.0321	0.031	0.0297	0.0287	0.028	0.0272	0.0263	0.0189	0.019	0.0191	0.0191	0.019	0.0194	0.0197	0.0199	0.02	0.0202	0.0204	0.0198	0.0203	0.0202
2 Denmark	0	0	0	0	0	0	0	0	0	0	0	0	0.0069	0.0064	0.0064	0.0058	0.0052	0.0046	0.0041	0.0037	0.0033	0.0031	0.0028	0.0027	0.0025	0.0024	0.0023	0.0022	0.0022	0.0022	0.0021	0.0021	0.002	0.002	0.002	0.0017	0.0017	0.0017	0.0017	0.0017	0.0017	0.0017	0.0017	0.0017	0.0017	0.0017	0.0017	0.0017	0.0017
3 Germany	2363.79	2228.23	2276.17	2095.79	1942.03	1921.99	1955.12	1992.76	1886.35	1847.75	1800.49	1663.2	1658.94	1531.43	1541.6	1403.51	1238.46	1094.42	971.357	869.218	789.115	721.976	671.322	629.149	594.945	567.817	543.002	525.454	513.962	504.557	493.272	484.662	478.577	470.695	463.135	389.282	390.901	391.458	391.991	390.029	394.189	397.623	399.334	400.581	401.9	404.325	398.805	403.113	401.723
4 Greece	357.469	342.075	351.233	340.364	342.311	306.282	314.215	336.815	281.699	267.292	237.612	166.323	165.403	140.097	141.653	116.811	90.5593	70.5861	55.5842	44.5435	36.7444	30.8384	26.709	23.5278	21.0539	19.2472	17.6058	16.5166	15.8258	15.255	14.5909	14.0865	13.7656	13.3265	12.9026	9.2071	9.2514	9.3134	9.3301	9.2239	9.4453	9.612	9.6884	9.7315	9.8291	9.9005	9.6438	9.8666	9.8175
5 Spain	262.293	253.256	228.451	175.603	159.555	138.013	110.896	103.026	73.8064	68.1698	52.1725	30.8225	30.7464	28.4724	28.6607	26.1865	23.2124	20.6023	18.3605	16.491	15.0188	13.7805	12.8435	12.0614	11.4258	10.9209	10.4582	10.1308	9.9164	9.741	9.5301	9.3692	9.2557	9.1083	8.9668	7.5746	7.6057	7.6167	7.6272	7.5906	7.6698	7.7352	7.768	7.7921	7.8175	7.8639	7.76	7.842	7.8162
6 France	16.042	11.752	10.972	7.202	3.822	6.786	3.874	7.54	8.138	7.8	0	0	0.0022	0.002	0.002	0.0019	0.0017	0.0015	0.0013	0.0012	0.0011	0.001	0.0009	0.0009	0.0008	0.0008	0.0008	0.0007	0.0007	0.0007	0.0007	0.0007	0.0007	0.0007	0.0007	0.0006	0.0006	0.0006	0.0006	0.0006	0.0006	0.0006	0.0006	0.0006	0.0006	0.0006	0.0006	0.0006	0.0006
7 Ireland	0	0	0	0	0	0	0	0	0	0	0	0	0.0007	0.0006	0.0006	0.0006	0.0005	0.0004	0.0004	0.0004	0.0003	0.0003	0.0003	0.0003	0.0002	0.0002	0.0002	0.0002	0.0002	0.0002	0.0002	0.0002	0.0002	0.0002	0.0002	0.0002	0.0002	0.0002	0.0002	0.0002	0.0002	0.0002	0.0002	0.0002	0.0002	0.0002	0.0002	0.0002	0.0002
8 Italy	2.5258	0.5583	4.2007	3.1107	1.9142	2.6853	2.446	2.127	1.9408	2.2865	2.1536	0	0.0084	0.0078	0.0079	0.0072	0.0064	0.0057	0.0051	0.0046	0.0042	0.0038	0.0036	0.0034	0.0032	0.003	0.0029	0.0028	0.0028	0.0027	0.0027	0.0026	0.0026	0.0025	0.0025	0.0021	0.0021	0.0021	0.0021	0.0021	0.0021	0.0022	0.0022	0.0022	0.0022	0.0022	0.0022	0.0022	0.0022
9 Luxembourg	0	0	0	0	0	0	0	0	0	0	0	0	0	0	0	0	0	0	0	0	0	0	0	0	0	0	0	0	0	0	0	0	0	0	0	0	0	0	0	0	0	0	0	0	0	0	0	0	0
10 Netherlands	0	0	0	0	0	0	0	0	0	0	0	0	0.0488	0.0452	0.0455	0.0416	0.0369	0.0328	0.0292	0.0263	0.024	0.022	0.0205	0.0193	0.0183	0.0175	0.0167	0.0162	0.0159	0.0156	0.0152	0.015	0.0148	0.0146	0.0144	0.0121	0.0122	0.0122	0.0122	0.0122	0.0123	0.0124	0.0125	0.0125	0.0125	0.0126	0.0124	0.0126	0.0125
11 Austria	0	0	0	0	0	0	0	0	0	0	0	0	0	0	0	0	0	0	0	0	0	0	0	0	0	0	0	0	0	0	0	0	0	0	0	0	0	0	0	0	0	0	0	0	0	0	0	0	0
12 Portugal	0	0	0	0	0	0	0	0	0	0	0	0	0	0	0	0	0	0	0	0	0	0	0	0	0	0	0	0	0	0	0	0	0	0	0	0	0	0	0	0	0	0	0	0	0	0	0	0	0
13 Finland	0	0	0	0	0	0	0	0	0	0	0	0	0	0	0	0	0	0	0	0	0	0	0	0	0	0	0	0	0	0	0	0	0	0	0	0	0	0	0	0	0	0	0	0	0	0	0	0	0
14 Sweden	0	0	0	0	0	0	0	0	0	0	0	0	0.0001	0.0001	0.0001	0.0001	0.0001	0.0001	0	0	0	0	0	0	0	0	0	0	0	0	0	0	0	0	0	0	0	0	0	0	0	0	0	0	0	0	0	0	0
15 UK	505.18	453.668	425.083	449.323	438.56	453.869	458.007	420.337	317.05	289.907	214.153	104.725	104.47	96.8978	97.5623	89.2967	79.3247	70.5482	62.9901	56.673	51.6894	47.4902	44.3093	41.6515	39.4897	37.7715	36.196	35.0814	34.3527	33.7566	33.039	32.4921	32.1071	31.6058	31.1246	26.3474	26.4571	26.4978	26.5369	26.4138	26.6888	26.9168	27.0326	27.1184	27.2089	27.3713	27.0169	27.3019	27.2162
16 Czech Republic	986.828	999.037	996.626	953.968	873.085	871.947	879.324	848.802	744.039	710.876	708	674.892	673.248	620.56	621.314	565.297	499.345	441.834	392.677	351.818	319.665	292.671	272.195	255.103	241.183	230.077	219.919	212.633	207.736	203.672	198.897	195.181	192.459	189.054	185.788	156.841	157.229	157.203	157.168	156.168	157.533	158.613	159.023	159.253	159.509	160.186	157.824	159.221	158.441
17 Estonia	0	0	0	0	0	0	0	0	0	0	0	0	0	0	0	0	0	0	0	0	0	0	0	0	0	0	0	0	0	0	0	0	0	0	0	0	0	0	0	0	0	0	0	0	0	0	0	0	0
18 Cyprus	0	0	0	0	0	0	0	0	0	0	0	0	0	0	0	0	0	0	0	0	0	0	0	0	0	0	0	0	0	0	0	0	0	0	0	0	0	0	0	0	0	0	0	0	0	0	0	0	0
19 Latvia	0	0	0	0	0	0	0	0	0	0	0	0	0	0	0	0	0	0	0	0	0	0	0	0	0	0	0	0	0	0	0	0	0	0	0	0	0	0	0	0	0	0	0	0	0	0	0	0	0
20 Lithuania	0	0	0	0	0	0	0	0	0	0	0	0	0	0	0	0	0	0	0	0	0	0	0	0	0	0	0	0	0	0	0	0	0	0	0	0	0	0	0	0	0	0	0	0	0	0	0	0	0
21 Hungary	73.1914	73.5453	74.2241	70.9062	65.1485	66.7072	68.8915	67.2596	67.4795	66.4845	63.5675	61.2311	61.0715	55.4055	54.936	49.1949	42.7352	37.2374	32.6352	28.8742	25.9477	23.5201	21.6855	20.1638	18.9276	17.9401	17.0426	16.3893	15.936	15.5542	15.1194	14.7731	14.5092	14.1936	13.8918	11.5919	11.5909	11.5583	11.5248	11.4174	11.4921	11.5442	11.5447	11.5313	11.5202	11.5405	11.3312	11.4067	11.3178
22 Malta	0	0	0	0	0	0	0	0	0	0	0	0	0	0	0	0	0	0	0	0	0	0	0	0	0	0	0	0	0	0	0	0	0	0	0	0	0	0	0	0	0	0	0	0	0	0	0	0	0
23 Poland	2882.9	2828.52	2616.28	2550.2	2362.09	2318.7	2332.85	2420.78	2392.16	2262.29	2255.29	2190.03	2184.7	2024.43	2036.69	1862.44	1653.01	1468.95	1310.64	1178.43	1074.18	986.389	919.873	864.305	819.099	783.15	750.197	726.836	711.496	698.921	683.836	672.304	664.13	653.559	643.411	544.416	546.55	547.256	547.929	545.249	550.796	555.366	557.619	559.249	560.974	564.183	556.729	562.465	560.555
24 Slovenia	49.5723	50.6419	51.8849	49.607	48.5596	50.0723	50.2627	45.7703	45.0042	34.2502	36.1088	39.4345	39.3357	35.7297	35.3958	31.7448	27.6357	24.1288	21.1854	18.774	16.8931	15.3299	14.146	13.1625	12.3624	11.7221	11.1399	10.7149	10.4189	10.1691	9.8853	9.6588	9.4852	9.2786	9.081	7.5945	7.5917	7.5683	7.5444	7.4728	7.5187	7.55	7.548	7.5372	7.5275	7.5384	7.4013	7.4476	7.3881
25 Slovakia	26.6744	23.5199	23.0585	26.1151	27.351	25.6824	25.188	23.7566	24.4641	24.2562	20.7376	18.9133	18.8448	9.0851	5.5903	3.2533	2.0196	1.3617	0.9737	0.7299	0.5722	0.462	0.3864	0.33	0.2874	0.2555	0.2285	0.2089	0.1946	0.1824	0.1705	0.1607	0.1533	0.1453	0.1379	0.1033	0.1015	0.1001	0.0982	0.0953	0.0954	0.0949	0.0937	0.0923	0.0916	0.0905	0.0871	0.0874	0.0858
26 Bulgaria	174.922	180.342	201.436	203.441	192.529	206.819	259.975	234.911	200.444	214.349	244.994	213.593	213.071	196.89	197.624	180.228	159.541	141.436	125.918	112.993	102.814	94.2571	87.7714	82.3563	77.9491	74.4391	71.2253	68.9337	67.4113	66.1554	64.6646	63.5145	62.6855	61.6314	60.62	51.2187	51.3837	51.4137	51.4405	51.1514	51.6371	52.0299	52.204	52.3193	52.4431	52.7059	51.9686	52.4683	52.2512
27 Romania	242.556	271.213	287.137	291.449	274.796	247.142	278.92	265.682	194.955	186.257	197.245	177.268	176.83	162.62	162.641	147.629	130.068	114.811	101.813	91.0393	82.5769	75.4863	70.112	65.6306	61.9828	59.0726	56.413	54.5018	53.2116	52.1388	50.8836	49.9034	49.1813	48.2839	47.4234	39.9546	40.0413	40.0217	39.9994	39.7295	40.0673	40.3312	40.4233	40.469	40.5212	40.6814	40.0623	40.4073	40.1941
28 Norway	41.3351	67.2995	114.451	96.383	74.2121	54.3735	38.9466	34.5349	52.1255	47.0675	31.0786	22.9858	22.9296	20.9466	20.8269	18.7846	16.4497	14.4401	12.7411	11.341	10.2446	9.3296	8.6356	8.0578	7.5872	7.2107	6.8676	6.6183	6.4464	6.3019	6.1361	6.0047	5.9052	5.785	5.67	4.7613	4.7638	4.7536	4.7431	4.703	4.7355	4.7591	4.7621	4.7596	4.7578	4.7688	4.6877	4.7206	4.6876
29 Switzerland	0	0	0	0	0	0	0	0	0	0	0	0	0	0	0	0	0	0	0	0	0	0	0	0	0	0	0	0	0	0	0	0	0	0	0	0	0	0	0	0	0	0	0	0	0	0	0	0	0
30 Iceland	0	0	0	0	0	0	0	0	0	0	0	0	0	0	0	0	0	0	0	0	0	0	0	0	0	0	0	0	0	0	0	0	0	0	0	0	0	0	0	0	0	0	0	0	0	0	0	0	0
31 Croatia	0	0	0	0	0	0	0	0	0	0	0	0	0	0	0	0	0	0	0	0	0	0	0	0	0	0	0	0	0	0	0	0	0	0	0	0	0	0	0	0	0	0	0	0	0	0	0	0	0
32 Turkey	442.744	542.11	628.418	685.518	700.789	700.903	695.852	651.228	566.957	578.352	535.846	648.854	647.047	572.38	557.908	487.506	413.123	352.007	302.36	262.77	232.491	207.809	189.303	174.11	161.845	152.064	143.263	136.78	132.161	128.234	123.892	120.375	117.609	114.431	111.407	91.5206	91.2331	90.6783	90.1195	88.9489	89.292	89.4426	89.1642	88.7715	88.3958	88.2785	86.2952	86.6302	85.6347
33 Macedonia	0	0	0	0	0	0	0	0	0	0	0	0	0	0	0	0	0	0	0	0	0	0	0	0	0	0	0	0	0	0	0	0	0	0	0	0	0	0	0	0	0	0	0	0	0	0	0	0	0
34 USA	23667.2	24181.5	23801.8	24254.1	22195.7	22267.1	22456.4	20745	19978.8	20307.3	18056.9	14589.5	14553.9	13494.7	13586.1	12430.7	11038	9812.87	8758.41	7877.47	7182.74	6597.55	6154.34	5784.09	5482.98	5243.68	5024.27	4869.03	4767.48	4684.41	4584.43	4508.23	4454.52	4384.67	4317.62	3653.53	3668.66	3674.2	3679.53	3662.31	3700.41	3731.96	3747.95	3759.75	3772.19	3794.64	3745.29	3784.76	3772.73
35 Japan	27.1264	29.3437	27.7818	28.0143	26.196	24.8631	25.9558	27.0698	30.5179	32.1598	30.8628	31.4259	31.3492	29.0593	29.252	26.7567	23.7513	21.1089	18.8355	16.9368	15.4398	14.1791	13.2244	12.4269	11.7783	11.2629	10.7903	10.4559	10.2369	10.0577	9.8422	9.6779	9.5619	9.4112	9.2666	7.8394	7.8715	7.883	7.8941	7.8567	7.9382	8.0056	8.0395	8.0645	8.0908	8.1386	8.0322	8.1166	8.0904
36 Canada	1446.67	1450.18	1554.77	1411.55	1288.91	1421.22	1413.34	1407.17	1472.57	1453.85	1288.31	1257.04	1253.97	1162.43	1169.97	1070.24	950.165	844.581	753.724	677.831	617.98	567.571	529.387	497.487	471.541	450.915	432.006	418.616	409.844	402.661	394.029	387.441	382.787	376.749	370.952	313.89	315.162	315.61	316.04	314.534	317.777	320.457	321.8	322.784	323.823	325.72	321.457	324.814	323.753
37 Australia	8439.69	8533.05	9000.75	9039.73	9350.5	10323.1	9782.07	10272.4	11074.8	11950.8	12501	12226.8	12197	11305.7	11378.4	10407.8	9239.33	8212.02	7328.1	6589.81	6007.61	5517.28	5145.87	4835.59	4583.22	4382.59	4198.67	4068.41	3983.06	3913.16	3829.17	3765.06	3719.75	3660.98	3604.57	3049.92	3062.23	3066.54	3070.66	3055.98	3087.44	3113.44	3126.44	3135.95	3146	3164.38	3122.9	3155.47	3145.11
38 New Zealand	132.462	142.527	118.567	118.784	111.111	131.361	121.159	120.698	114.687	97.9343	81.024	68.3284	68.1587	63.0432	63.4179	57.8741	51.2358	45.4217	40.4362	36.2845	33.018	30.2728	28.1961	26.4636	25.0556	23.9369	22.9123	22.186	21.7087	21.3174	20.8486	20.49	20.2355	19.9069	19.5916	16.5356	16.6002	16.6208	16.6403	16.5566	16.7263	16.8659	16.934	16.983	17.0349	17.1325	16.9016	17.0771	17.017
39 Russian Federation	6574.68	6657.81	6809.95	6991.92	6423.52	6954.53	6875.74	7738.53	7700.05	7932.73	8375.27	8745.14	8723.84	8088.72	8142.96	7450.4	6615.71	5881.53	5249.6	4721.66	4305.29	3954.56	3688.92	3466.99	3286.49	3143.04	3011.51	2918.42	2857.52	2807.68	2747.71	2702	2669.76	2627.85	2587.62	2189.74	2198.76	2202.04	2205.19	2194.83	2217.61	2236.46	2245.99	2253.01	2260.42	2273.82	2244.22	2267.81	2260.56
40 Rest of Annex I	0	0	0	0	0	0	0	0	0	0	0	0	0	0	0	0	0	0	0	0	0	0	0	0	0	0	0	0	0	0	0	0	0	0	0	0	0	0	0	0	0	0	0	0	0	0	0	0	0
41 China	51373.4	55862.4	60779.1	62263	65631.7	72117.2	78026.3	77583.2	79317.4	79620.1	78826.4	71967.1	71788.6	66103.8	66213.3	60169.5	53058.8	46870.2	41590.8	37210.7	33769.9	30885.4	28700.7	26879.1	25397.3	24216.4	23136.9	22363.8	21845.4	21415.9	20910.4	20517.7	20230.9	19871.3	19526.4	16449.6	16492.9	16492.3	16490.7	16386.5	16533.8	16650.8	16696.6	16723.4	16752.8	16827.1	16577.9	16728.9	16648
42 India	6837.39	7152.76	7584.26	8182.75	8868.59	8912.63	9292.77	9800.64	9933.98	10605.7	11034.7	11223.6	11195.8	10341.8	10388.2	9468.56	8373.51	7416.08	6596.24	5914.15	5377.64	4927.03	4585.94	4301.39	4070.03	3885.99	3717.52	3597.67	3518.34	3453.04	3375.31	3315.52	3272.63	3217.85	3165.29	2670.36	2679.63	2681.79	2683.77	2669.11	2695.29	2716.59	2726.37	2733.05	2740.19	2754.66	2716.34	2743.32	2732.45
43 Mexico	296.45	336.364	357.051	318.329	276.83	335.186	434.123	332.631	321.405	324.566	241.761	291.395	290.672	268.171	269.111	244.992	216.4	191.447	170.113	152.384	138.448	126.753	117.9	110.516	104.512	99.7332	95.3611	92.2435	90.1706	88.46	86.4324	84.8671	83.737	82.3031	80.9276	68.2244	68.4416	68.4766	68.5072	68.112	68.7615	69.2857	69.5149	69.6647	69.826	70.1748	69.1752	69.8432	69.5448
44 Brazil	103.971	95.7789	98.3746	111.406	93.7561	88.1214	89.34	105.389	138.101	128.119	128.386	110.353	110.08	101.849	102.472	93.5421	82.8392	73.4602	65.4144	58.7118	53.4372	49.0034	45.6491	42.8504	40.5759	38.7688	37.1135	35.9407	35.1707	34.5396	33.783	33.2047	32.7947	32.2648	31.7563	26.8081	26.9142	26.949	26.9822	26.8479	27.1244	27.3521	27.4641	27.545	27.6307	27.7904	27.4178	27.7038	27.6079
45 Argentina	0.6176	3.483	2.7172	3.977	2.0256	1.6056	2.2232	2.3467	2.0503	1.408	0.8399	0.5681	0.5667	0.5244	0.5281	0.4822	0.4269	0.3785	0.337	0.3024	0.2752	0.2523	0.2351	0.2206	0.2089	0.1997	0.1912	0.1852	0.1812	0.178	0.1742	0.1712	0.1691	0.1664	0.1639	0.1382	0.1388	0.139	0.1393	0.1386	0.1401	0.1413	0.1419	0.1424	0.1429	0.1437	0.1418	0.1433	0.1429
46 Colombia	1607.37	1785.13	1902.31	2000.28	1981.37	2023.36	2335.04	2422.7	2326.69	2410.56	2328.1	2463.19	2456.38	2227.82	2220.42	1985.68	1718.78	1492.05	1302.78	1148.67	1029.41	930.815	856.834	795.712	746.33	707.152	671.585	646.067	628.791	614.422	597.754	584.715	575.053	563.171	551.809	456.704	457.606	457.167	456.696	453.116	457.163	460.279	461.234	461.604	462.054	463.857	455.896	460.01	457.135
47 Rest of Latin America	232.449	227.587	193.982	165.59	119.622	96.6329	79.2346	55.2204	85.5831	112.849	85.3175	72.6889	72.5102	67.1812	67.6316	61.8274	54.8421	48.7063	43.4319	39.0304	35.5625	32.6439	30.4347	28.5903	27.0908	25.8995	24.8077	24.0352	23.5296	23.1159	22.6183	22.239	21.9714	21.6237	21.29	17.9963	18.0706	18.0973	18.123	18.0369	18.225	18.3807	18.4591	18.5168	18.5778	18.6882	18.443	18.6378	18.5775
48 Korea	52.7828	52.6337	55.5815	53.4052	48.5134	40.1358	40.1358	39.0133	33.8153	32.567	32.8651	32.1571	32.0776	29.6729	29.845	27.2394	24.1196	21.3862	19.0417	17.0887	15.5518	14.2599	13.2823	12.4667	11.8037	11.2768	10.7942	10.4519	10.2269	10.0423	9.8213	9.6521	9.532	9.377	9.2282	7.7901	7.8201	7.8295	7.8384	7.7987	7.8783	7.9436	7.9754	7.9981	8.0222	8.0678	7.9589	8.0412	8.0126
49 Taiwan	0	0	0	0	0	0	0	0	0	0	0	0	0.0014	0.0013	0.0013	0.0012	0.0011	0.0009	0.0008	0.0008	0.0007	0.0006	0.0006	0.0006	0.0005	0.0005	0.0005	0.0005	0.0005	0.0005	0.0004	0.0004	0.0004	0.0004	0.0004	0.0004	0.0004	0.0004	0.0004	0.0004	0.0004	0.0004	0.0004	0.0004	0.0004	0.0004	0.0004	0.0004	0.0004
50 Indonesia	4112.72	5655.12	6011.83	5966.3	6983.67	7800.58	9752.54	10373.1	11243.9	11125	10260.5	10419	10393.4	9480.18	9407.1	8473.63	7413.3	6502.4	5733.39	5100.21	4604.37	4190.76	3876.77	3615.3	3402.22	3231.52	3076.02	2962.59	2883.79	2817.37	2741.6	2681.21	2635.11	2579.94	2527.13	2122.61	2122.49	2116.7	2110.79	2091.82	2104.98	2114.15	2114.22	2111.85	2109.81	2113.4	2076.39	2089.65	2073.9
51 Rest of ASEAN	1126.09	1202.01	1303.11	1239.68	1367.95	1438.03	1521.08	1396.42	1346.93	1341.52	1320.04	1344.97	1341.67	924.546	724.775	522.182	377.425	282.438	217.901	173.042	141.75	118.484	101.736	88.7337	78.607	70.6728	63.9192	58.7624	54.8033	51.4172	48.1035	45.3326	43.0225	40.7001	38.571	30.7068	29.9813	29.1964	28.4409	27.5185	27.1143	26.6616	26.0926	25.5093	24.9535	24.4914	23.5106	23.2238	22.5748
52 OPEC excl Venezuela	42.3768	45.0558	45.4506	44.0604	32.2368	30.4578	32.556	29.1066	30.7218	29.9166	33.7476	37.3566	37.2649	34.5383	34.7771	31.8041	28.2224	25.0747	22.3676	20.1078	18.3268	16.8275	15.6926	14.7449	13.9744	13.3623	12.8013	12.4045	12.1451	11.933	11.6776	11.4831	11.3461	11.1678	10.9966	9.2991	9.338	9.3525	9.3663	9.3226	9.4202	9.5012	9.5423	9.5727	9.6048	9.6625	9.5366	9.6378	9.6073
53 Rest of world	1578.61	1625.8	1556.65	1663.28	1569.9	1855.88	2066.03	1997.29	2015.54	1958.06	1940.01	2333.66	2327.86	2152.64	2165.11	1975.35	1748.3	1549.49	1379.06	1237.17	1125.55	1031.76	960.814	901.63	853.535	815.317	780.321	755.504	739.185	725.798	709.774	697.509	688.793	677.556	666.774	562.6	564.773	565.448	566.088	563.209	568.963	573.692	575.987	577.628	579.368	582.666	574.775	580.723	578.649
54 Ukraine	1445.62	1473.44	1586.39	1572.17	1458.25	1407.37	1684.65	1678.95	1703.72	1347.22	844.702	838.253	836.174	774.001	779.032	711.453	630.307	559.144	498.06	447.152	407.082	373.39	347.903	326.636	309.354	295.626	283.051	274.149	268.317	263.542	257.807	253.43	250.337	246.326	242.478	204.724	205.558	205.848	206.125	205.124	207.261	209.025	209.906	210.549	211.229	212.476	209.653	211.865	211.157
55 Saudi Arabia	0	0	0	0	0	0	0	0	0	0	0	0	0	0	0	0	0	0	0	0	0	0	0	0	0	0	0	0	0	0	0	0	0	0	0	0	0	0	0	0	0	0	0	0	0	0	0	0	0
56 Nigeria	0.2064	0.2064	0.5934	0.8256	0.8772	0.9804	0.8256	1.2384	1.1352	1.1868	1.2126	1.1868	1.1839	1.0972	1.1048	1.0104	0.8965	0.7965	0.7104	0.6386	0.582	0.5343	0.4983	0.4682	0.4437	0.4242	0.4064	0.3938	0.3855	0.3788	0.3707	0.3645	0.3602	0.3545	0.3491	0.2951	0.2964	0.2968	0.2973	0.2959	0.299	0.3016	0.3029	0.3038	0.3049	0.3067	0.3027	0.3059	0.3049
57 South Africa	5793.07	5787.65	5861.55	5967.8	5899.53	6026.65	5975.54	6113.18	6072.3	6171.87	6051.29	6052.21	6035.47	5481.14	5469.6	4897.37	4243.86	3687.67	3222.66	2843.63	2550.14	2307.32	2125.13	1974.56	1852.93	1756.46	1668.85	1606.1	1563.78	1528.64	1487.74	1455.83	1432.3	1403.21	1375.39	1138.78	1141.36	1140.59	1139.75	1131.14	1141.57	1149.69	1152.41	1153.67	1155.14	1159.99	1140.42	1151.05	1144.2
58 Rest of Africa	101.815	97.0778	91.8953	69.4904	78.1885	80.0298	98.2088	208.911	235.21	330.445	301.441	216.27	215.742	200.015	201.349	184.204	163.545	145.378	129.743	116.682	106.383	97.7081	91.138	85.6496	81.1859	77.6382	74.3857	72.0837	70.5771	69.3442	67.8612	66.7302	65.9326	64.8959	63.9009	54.0683	54.2906	54.3708	54.4479	54.1912	54.7534	55.2186	55.4533	55.6261	55.8084	56.1388	55.4066	55.9888	55.809
59 Africa OPEC	0	0	0	0	0	0	0	0	0	0	0	0	0.0036	0.0033	0.0033	0.003	0.0027	0.0024	0.0021	0.0019	0.0017	0.0016	0.0015	0.0014	0.0013	0.0013	0.0012	0.0012	0.0012	0.0011	0.0011	0.0011	0.0011	0.0011	0.001	0.0009	0.0009	0.0009	0.0009	0.0009	0.0009	0.0009	0.0009	0.0009	0.0009	0.0009	0.0009	0.0009	0.0009
60 Malaysia	20.7985	23.781	28.3736	33.0981	56.4304	63.2664	76.9649	77.8623	76.3842	70.9207	67.5423	59.6241	59.4778	54.9605	55.1862	50.3242	44.5367	39.4725	35.1326	31.519	28.6742	26.2835	24.4723	22.9605	21.7306	20.7515	19.8551	19.2167	18.7933	18.4444	18.0297	17.7102	17.4804	17.1877	16.9067	14.2774	14.3251	14.3351	14.3442	14.2649	14.4024	14.514	14.5644	14.5983	14.6346	14.7099	14.505	14.6466	14.5875
61 Kazakhstan	1602.89	1777.85	1800.58	2045.07	1854	2032.57	2130.9	2209.09	2195.53	2090.88	1972.39	1892.64	1887.99	1748.49	1759.39	1607.76	1425.64	1265.75	1128.38	1013.78	923.488	847.515	789.998	741.977	702.931	671.898	643.46	623.313	610.095	599.265	586.269	576.339	569.309	560.21	551.476	466.111	467.968	468.594	469.192	466.9	471.7	475.659	477.619	479.044	480.549	483.337	476.926	481.892	480.263
0	Dan_1-5C_QU_covid_S3
RERY	Primary energy supply (before trade), PJ, NER x NR
	2005	2006	2007	2008	2009	2010	2011	2012	2013	2014	2015	2016	2017	2018	2019	2020	2021	2022	2023	2024	2025	2026	2027	2028	2029	2030	2031	2032	2033	2034	2035	2036	2037	2038	2039	2040	2041	2042	2043	2044	2045	2046	2047	2048	2049	2050	2051	2052	2053
1 Belgium	2.3944	0.6371	0	0	0	0.3626	0.3173	0.4533	0.476	0.4306	0.34	0.3173	0.3152	0.2688	0.2727	0.2263	0.1767	0.1386	0.1097	0.0884	0.0732	0.0617	0.0536	0.047	0.0426	0.0389	0.0357	0.0335	0.0321	0.031	0.0297	0.0287	0.028	0.0271	0.0264	0.0188	0.019	0.019	0.0191	0.0189	0.0193	0.0197	0.0198	0.0199	0.0201	0.0203	0.0198	0.0202	0.0201
2 Denmark	0	0	0	0	0	0	0	0	0	0	0	0	0.0069	0.0064	0.0064	0.0058	0.0052	0.0046	0.0041	0.0037	0.0033	0.0031	0.0028	0.0027	0.0025	0.0024	0.0023	0.0022	0.0022	0.0022	0.0021	0.0021	0.002	0.002	0.002	0.0017	0.0017	0.0017	0.0017	0.0017	0.0017	0.0017	0.0017	0.0017	0.0017	0.0017	0.0017	0.0017	0.0017
3 Germany	2363.79	2228.23	2276.17	2095.79	1942.03	1921.99	1955.12	1992.76	1886.35	1847.75	1800.49	1663.2	1658.94	1531.43	1541.6	1403.51	1238.44	1094.4	971.365	869.237	789.129	722.009	671.364	627.091	596.116	567.893	543.297	525.661	514.071	504.528	493.178	484.805	478.582	469.989	463.74	388.811	390.56	391.085	391.63	389.643	393.603	397.159	398.677	399.998	401.448	403.953	398.376	402.659	401.34
4 Greece	357.469	342.075	351.233	340.364	342.311	306.282	314.215	336.815	281.699	267.292	237.612	166.323	165.403	140.097	141.653	116.811	90.5507	70.5861	55.5842	44.5436	36.7444	30.8489	26.709	23.3745	21.1541	19.2473	17.6347	16.5485	15.8342	15.2474	14.5901	14.1162	13.7656	13.2852	12.9422	9.1775	9.233	9.281	9.319	9.2052	9.3948	9.5934	9.6477	9.7048	9.7792	9.8923	9.6356	9.8484	9.7852
5 Spain	262.293	253.256	228.451	175.603	159.555	138.013	110.896	103.026	73.8064	68.1698	52.1725	30.8225	30.7464	28.4725	28.6607	26.1866	23.2121	20.602	18.3606	16.4913	15.019	13.7811	12.8442	12.0231	11.4476	10.9223	10.4638	10.1347	9.9185	9.7404	9.5283	9.3719	9.2558	9.095	8.9782	7.5657	7.5992	7.6096	7.6204	7.5833	7.6587	7.7264	7.7556	7.7811	7.809	7.8569	7.7519	7.8334	7.809
6 France	16.042	11.752	10.972	7.202	3.822	6.786	3.874	7.54	8.138	7.8	0	0	0.0022	0.002	0.002	0.0019	0.0017	0.0015	0.0013	0.0012	0.0011	0.001	0.0009	0.0009	0.0008	0.0008	0.0008	0.0007	0.0007	0.0007	0.0007	0.0007	0.0007	0.0007	0.0007	0.0006	0.0006	0.0006	0.0006	0.0006	0.0006	0.0006	0.0006	0.0006	0.0006	0.0006	0.0006	0.0006	0.0006
7 Ireland	0	0	0	0	0	0	0	0	0	0	0	0	0.0007	0.0006	0.0006	0.0006	0.0005	0.0004	0.0004	0.0004	0.0003	0.0003	0.0003	0.0003	0.0002	0.0002	0.0002	0.0002	0.0002	0.0002	0.0002	0.0002	0.0002	0.0002	0.0002	0.0002	0.0002	0.0002	0.0002	0.0002	0.0002	0.0002	0.0002	0.0002	0.0002	0.0002	0.0002	0.0002	0.0002
8 Italy	2.5258	0.5583	4.2007	3.1107	1.9142	2.6853	2.446	2.127	1.9408	2.2865	2.1536	0	0.0084	0.0078	0.0079	0.0072	0.0064	0.0057	0.0051	0.0046	0.0042	0.0038	0.0036	0.0033	0.0032	0.003	0.0029	0.0028	0.0028	0.0027	0.0027	0.0026	0.0026	0.0025	0.0025	0.0021	0.0021	0.0021	0.0021	0.0021	0.0021	0.0022	0.0022	0.0022	0.0022	0.0022	0.0022	0.0022	0.0022
9 Luxembourg	0	0	0	0	0	0	0	0	0	0	0	0	0	0	0	0	0	0	0	0	0	0	0	0	0	0	0	0	0	0	0	0	0	0	0	0	0	0	0	0	0	0	0	0	0	0	0	0	0
10 Netherlands	0	0	0	0	0	0	0	0	0	0	0	0	0.0488	0.0452	0.0455	0.0416	0.0369	0.0328	0.0292	0.0263	0.024	0.022	0.0205	0.0192	0.0183	0.0175	0.0167	0.0162	0.0159	0.0156	0.0152	0.015	0.0148	0.0146	0.0144	0.0121	0.0122	0.0122	0.0122	0.0122	0.0123	0.0124	0.0124	0.0125	0.0125	0.0126	0.0124	0.0126	0.0125
11 Austria	0	0	0	0	0	0	0	0	0	0	0	0	0	0	0	0	0	0	0	0	0	0	0	0	0	0	0	0	0	0	0	0	0	0	0	0	0	0	0	0	0	0	0	0	0	0	0	0	0
12 Portugal	0	0	0	0	0	0	0	0	0	0	0	0	0	0	0	0	0	0	0	0	0	0	0	0	0	0	0	0	0	0	0	0	0	0	0	0	0	0	0	0	0	0	0	0	0	0	0	0	0
13 Finland	0	0	0	0	0	0	0	0	0	0	0	0	0	0	0	0	0	0	0	0	0	0	0	0	0	0	0	0	0	0	0	0	0	0	0	0	0	0	0	0	0	0	0	0	0	0	0	0	0
14 Sweden	0	0	0	0	0	0	0	0	0	0	0	0	0.0001	0.0001	0.0001	0.0001	0.0001	0.0001	0	0	0	0	0	0	0	0	0	0	0	0	0	0	0	0	0	0	0	0	0	0	0	0	0	0	0	0	0	0	0
15 UK	505.18	453.668	425.083	449.323	438.56	453.869	458.007	420.337	317.05	289.907	214.153	104.725	104.47	96.8981	97.5625	89.297	79.3236	70.5469	62.9906	56.6742	51.6902	47.4923	44.312	41.521	39.5641	37.7763	36.2148	35.0946	34.3596	33.7548	33.0329	32.5013	32.1074	31.5603	31.1637	26.3167	26.4349	26.4735	26.5134	26.3886	26.6507	26.8865	26.9899	27.0805	27.1794	27.347	26.9889	27.2723	27.1912
16 Czech Republic	986.828	999.037	996.626	953.968	873.085	871.947	879.324	848.802	744.039	710.876	708	674.892	673.248	620.562	621.315	565.298	499.338	441.826	392.68	351.826	319.67	292.684	272.212	254.3	241.641	230.108	220.034	212.713	207.778	203.661	198.861	195.236	192.461	188.781	186.023	156.658	157.097	157.06	157.029	156.019	157.308	158.435	158.773	159.032	159.338	160.047	157.663	159.052	158.299
17 Estonia	0	0	0	0	0	0	0	0	0	0	0	0	0	0	0	0	0	0	0	0	0	0	0	0	0	0	0	0	0	0	0	0	0	0	0	0	0	0	0	0	0	0	0	0	0	0	0	0	0
18 Cyprus	0	0	0	0	0	0	0	0	0	0	0	0	0	0	0	0	0	0	0	0	0	0	0	0	0	0	0	0	0	0	0	0	0	0	0	0	0	0	0	0	0	0	0	0	0	0	0	0	0
19 Latvia	0	0	0	0	0	0	0	0	0	0	0	0	0	0	0	0	0	0	0	0	0	0	0	0	0	0	0	0	0	0	0	0	0	0	0	0	0	0	0	0	0	0	0	0	0	0	0	0	0
20 Lithuania	0	0	0	0	0	0	0	0	0	0	0	0	0	0	0	0	0	0	0	0	0	0	0	0	0	0	0	0	0	0	0	0	0	0	0	0	0	0	0	0	0	0	0	0	0	0	0	0	0
21 Hungary	73.1914	73.5453	74.2241	70.9062	65.1485	66.7072	68.8915	67.2596	67.4795	66.4845	63.5675	61.2311	61.0715	55.4056	54.9361	49.1951	42.7345	37.2367	32.6355	28.8748	25.9481	23.5213	21.6869	20.0971	18.9657	17.9427	17.0522	16.396	15.9394	15.5532	15.1165	14.7777	14.5094	14.1721	13.9104	11.5776	11.5808	11.5472	11.5143	11.4061	11.4749	11.5308	11.5258	11.5148	11.5074	11.5303	11.3194	11.3943	11.3075
22 Malta	0	0	0	0	0	0	0	0	0	0	0	0	0	0	0	0	0	0	0	0	0	0	0	0	0	0	0	0	0	0	0	0	0	0	0	0	0	0	0	0	0	0	0	0	0	0	0	0	0
23 Poland	2882.9	2828.52	2616.28	2550.2	2362.09	2318.7	2332.85	2420.78	2392.16	2262.29	2255.29	2190.03	2184.7	2024.44	2036.69	1862.45	1652.99	1468.93	1310.65	1178.46	1074.2	986.432	919.928	861.595	820.646	783.25	750.588	727.11	711.64	698.882	683.711	672.493	664.137	652.617	644.22	543.783	546.092	546.755	547.444	544.729	550.009	554.743	556.737	558.467	560.367	563.683	556.153	561.857	560.042
24 Slovenia	49.5723	50.6419	51.8849	49.607	48.5596	50.0723	50.2627	45.7703	45.0042	34.2502	36.1088	39.4345	39.3357	35.7298	35.3958	31.7449	27.6353	24.1283	21.1856	18.7744	16.8933	15.3306	14.1469	13.1196	12.3869	11.7237	11.146	10.7192	10.4211	10.1685	9.8835	9.6616	9.4853	9.2647	9.0929	7.5853	7.5852	7.5611	7.5376	7.4656	7.5077	7.5414	7.5359	7.5265	7.5194	7.5319	7.3938	7.4397	7.3815
25 Slovakia	26.6744	23.5199	23.0585	26.1151	27.351	25.6824	25.188	23.7566	24.4641	24.2562	20.7376	18.9133	18.8448	9.0851	5.5903	3.2533	2.0195	1.3617	0.9737	0.73	0.5722	0.462	0.3864	0.3284	0.2884	0.2555	0.2287	0.2091	0.1946	0.1824	0.1705	0.161	0.1533	0.1449	0.1382	0.1032	0.1014	0.0997	0.0981	0.0952	0.0949	0.0948	0.0934	0.0922	0.0913	0.0904	0.087	0.0873	0.0854
26 Bulgaria	174.922	180.342	201.436	203.441	192.529	206.819	259.975	234.911	200.444	214.349	244.994	213.593	213.071	196.891	197.624	180.229	159.538	141.434	125.919	112.995	102.816	94.2612	87.7767	82.097	78.0971	74.4488	71.2626	68.9599	67.4249	66.1517	64.6528	63.5325	62.6861	61.5424	60.6966	51.1589	51.3405	51.3665	51.3949	51.1026	51.5632	51.9715	52.1215	52.2461	52.3866	52.6595	51.9152	52.4119	52.2037
27 Romania	242.556	271.213	287.137	291.449	274.796	247.142	278.92	265.682	194.955	186.257	197.245	177.268	176.831	162.621	162.641	147.63	130.066	114.809	101.814	91.0413	82.5783	75.4897	70.1162	65.422	62.1019	59.0804	56.443	54.5228	53.2226	52.1359	50.8742	49.9178	49.1819	48.2135	47.484	39.9075	40.0074	39.9847	39.9638	39.6914	40.0095	40.2857	40.359	40.4122	40.4775	40.6457	40.0212	40.3639	40.1578
28 Norway	41.3351	67.2995	114.451	96.383	74.2121	54.3735	38.9466	34.5349	52.1255	47.0675	31.0786	22.9858	22.9296	20.9467	20.827	18.7847	16.4495	14.4398	12.7412	11.3413	10.2448	9.33	8.6361	8.032	7.6019	7.2117	6.8713	6.6209	6.4477	6.3016	6.135	6.0064	5.9052	5.7765	5.6773	4.7557	4.7598	4.7492	4.7389	4.6985	4.7287	4.7537	4.7545	4.7529	4.7527	4.7647	4.6829	4.7156	4.6835
29 Switzerland	0	0	0	0	0	0	0	0	0	0	0	0	0	0	0	0	0	0	0	0	0	0	0	0	0	0	0	0	0	0	0	0	0	0	0	0	0	0	0	0	0	0	0	0	0	0	0	0	0
30 Iceland	0	0	0	0	0	0	0	0	0	0	0	0	0	0	0	0	0	0	0	0	0	0	0	0	0	0	0	0	0	0	0	0	0	0	0	0	0	0	0	0	0	0	0	0	0	0	0	0	0
31 Croatia	0	0	0	0	0	0	0	0	0	0	0	0	0	0	0	0	0	0	0	0	0	0	0	0	0	0	0	0	0	0	0	0	0	0	0	0	0	0	0	0	0	0	0	0	0	0	0	0	0
32 Turkey	442.744	542.11	628.418	685.518	700.789	700.903	695.852	651.228	566.957	578.352	535.846	648.854	647.047	572.382	557.909	487.508	413.115	352	302.363	262.777	232.495	207.819	189.315	173.495	162.196	152.088	143.349	136.839	132.192	128.226	123.867	120.414	117.611	114.246	111.567	91.4012	91.1485	90.5868	90.0327	88.8569	89.1523	89.3347	89.0116	88.6388	88.2958	88.1997	86.2045	86.535	85.5571
33 Macedonia	0	0	0	0	0	0	0	0	0	0	0	0	0	0	0	0	0	0	0	0	0	0	0	0	0	0	0	0	0	0	0	0	0	0	0	0	0	0	0	0	0	0	0	0	0	0	0	0	0
34 USA	23667.2	24181.5	23801.8	24254.1	22195.7	22267.1	22456.4	20745	19978.8	20307.3	18056.9	14589.5	14553.9	13494.7	13586.1	12430.8	11037.8	9812.69	8758.48	7877.65	7182.86	6597.84	6154.71	5765.93	5493.34	5244.35	5026.89	4870.87	4768.45	4684.15	4583.59	4509.5	4454.57	4378.35	4323.05	3649.27	3665.58	3670.83	3676.26	3658.81	3695.11	3727.76	3742.01	3754.47	3768.1	3791.27	3741.41	3780.65	3769.27
35 Japan	27.1264	29.3437	27.7818	28.0143	26.196	24.8631	25.9558	27.0698	30.5179	32.1598	30.8628	31.4259	31.3492	29.0594	29.2521	26.7567	23.7509	21.1085	18.8356	16.9372	15.44	14.1797	13.2252	12.3878	11.8006	11.2643	10.796	10.4598	10.239	10.0572	9.8404	9.6806	9.562	9.3977	9.2783	7.8302	7.8649	7.8758	7.8871	7.8492	7.9268	7.9966	8.0268	8.0531	8.082	8.1314	8.0239	8.1078	8.0829
36 Canada	1446.67	1450.18	1554.77	1411.55	1288.91	1421.22	1413.34	1407.17	1472.57	1453.85	1288.31	1257.04	1253.97	1162.43	1169.97	1070.24	950.151	844.565	753.73	677.846	617.99	567.596	529.419	495.926	472.432	450.973	432.231	418.774	409.927	402.639	393.957	387.55	382.792	376.206	371.418	313.525	314.898	315.321	315.76	314.234	317.322	320.097	321.291	322.332	323.473	325.431	321.124	324.462	323.456
37 Australia	8439.69	8533.05	9000.75	9039.73	9350.5	10323.1	9782.07	10272.4	11074.8	11950.8	12501	12226.8	12197	11305.7	11378.4	10407.8	9239.2	8211.87	7328.16	6589.96	6007.71	5517.52	5146.18	4820.41	4591.88	4383.15	4200.86	4069.95	3983.86	3912.94	3828.47	3766.12	3719.79	3655.71	3609.11	3046.36	3059.66	3063.73	3067.94	3053.06	3083.02	3109.94	3121.49	3131.56	3142.59	3161.57	3119.67	3152.05	3142.23
38 New Zealand	132.462	142.527	118.567	118.784	111.111	131.361	121.159	120.698	114.687	97.9343	81.024	68.3284	68.1587	63.0434	63.4181	57.8743	51.2351	45.4209	40.4366	36.2853	33.0185	30.2742	28.1979	26.3793	25.1037	23.94	22.9244	22.1945	21.7132	21.3162	20.8447	20.4959	20.2357	19.8778	19.6166	16.5161	16.5861	16.6053	16.6254	16.5406	16.702	16.8466	16.9069	16.9589	17.0162	17.1171	16.8839	17.0584	17.0012
39 Russian Federation	6574.68	6657.81	6809.95	6991.92	6423.52	6954.53	6875.74	7738.53	7700.05	7932.73	8375.27	8745.14	8723.84	8088.74	8142.98	7450.42	6615.62	5881.43	5249.65	4721.77	4305.36	3954.74	3689.14	3456.11	3292.7	3143.44	3013.08	2919.53	2858.1	2807.52	2747.21	2702.76	2669.79	2624.07	2590.88	2187.19	2196.92	2200.02	2203.23	2192.73	2214.43	2233.95	2242.44	2249.86	2257.97	2271.8	2241.89	2265.35	2258.49
40 Rest of Annex I	0	0	0	0	0	0	0	0	0	0	0	0	0	0	0	0	0	0	0	0	0	0	0	0	0	0	0	0	0	0	0	0	0	0	0	0	0	0	0	0	0	0	0	0	0	0	0	0	0
41 China	51373.4	55862.4	60779.1	62263	65631.7	72117.2	78026.3	77583.2	79317.4	79620.1	78826.4	71967.1	71788.6	66104	66213.5	60169.7	53058	46869.3	41591.1	37211.5	33770.5	30886.8	28702.5	26793.4	25446.3	24219.7	23149.2	22372.4	21850	21414.7	20906.5	20523.6	20231.2	19842.2	19551.4	16430.1	16478.9	16477	16475.9	16370.7	16509.9	16631.9	16670	16699.8	16734.6	16812.2	16560.8	16710.8	16632.9
42 India	6837.39	7152.76	7584.26	8182.75	8868.59	8912.63	9292.77	9800.64	9933.98	10605.7	11034.7	11223.6	11195.8	10341.9	10388.3	9468.58	8373.39	7415.95	6596.29	5914.28	5377.72	4927.25	4586.22	4287.7	4077.84	3886.5	3719.49	3599.05	3519.07	3452.85	3374.69	3316.47	3272.67	3213.15	3169.33	2667.21	2677.36	2679.3	2681.37	2666.54	2691.39	2713.51	2722.01	2729.19	2737.2	2752.21	2713.51	2740.33	2729.94
43 Mexico	296.45	336.364	357.051	318.329	276.83	335.186	434.123	332.631	321.405	324.566	241.761	291.395	290.672	268.171	269.112	244.992	216.396	191.443	170.114	152.387	138.451	126.759	117.907	110.163	104.713	99.7463	95.4118	92.279	90.1892	88.4551	86.4164	84.8914	83.7379	82.1826	81.0312	68.1437	68.3834	68.413	68.4458	68.0463	68.6619	69.2069	69.4036	69.5661	69.75	70.1123	69.1032	69.7671	69.481
44 Brazil	103.971	95.7789	98.3746	111.406	93.7561	88.1214	89.34	105.389	138.101	128.119	128.386	110.353	110.08	101.849	102.472	93.5424	82.838	73.4589	65.415	58.7131	53.4381	49.0056	45.6519	42.714	40.6537	38.7738	37.1332	35.9545	35.1779	34.5377	33.7768	33.2142	32.7951	32.2177	31.7968	26.7765	26.8913	26.924	26.958	26.822	27.0851	27.321	27.4201	27.506	27.6004	27.7655	27.3891	27.6734	27.5823
45 Argentina	0.6176	3.483	2.7172	3.977	2.0256	1.6056	2.2232	2.3467	2.0503	1.408	0.8399	0.5681	0.5667	0.5244	0.5281	0.4822	0.4269	0.3785	0.337	0.3024	0.2752	0.2523	0.2351	0.2199	0.2094	0.1997	0.1913	0.1852	0.1813	0.178	0.1741	0.1713	0.1691	0.1662	0.1641	0.1381	0.1387	0.1389	0.1391	0.1385	0.1399	0.1411	0.1417	0.1422	0.1427	0.1436	0.1417	0.1432	0.1428
46 Colombia	1607.37	1785.13	1902.31	2000.28	1981.37	2023.36	2335.04	2422.7	2326.69	2410.56	2328.1	2463.19	2456.38	2227.82	2220.43	1985.69	1718.75	1492.02	1302.79	1148.7	1029.43	930.86	856.891	792.919	747.916	707.256	671.98	646.34	628.934	614.384	597.633	584.9	575.06	562.266	552.586	456.113	457.181	456.704	456.25	452.641	456.442	459.711	460.431	460.896	461.511	463.414	455.386	459.472	456.687
47 Rest of Latin America	232.449	227.587	193.982	165.59	119.622	96.6329	79.2346	55.2204	85.5831	112.849	85.3175	72.6889	72.5103	67.1814	67.6317	61.8275	54.8413	48.7055	43.4323	39.0313	35.5631	32.6453	30.4366	28.4999	27.1424	25.9029	24.8208	24.0443	23.5344	23.1146	22.6142	22.2453	21.9716	21.5923	21.317	17.9752	18.0553	18.0806	18.1068	18.0196	18.1988	18.3598	18.4297	18.4907	18.5575	18.6715	18.4238	18.6174	18.5603
48 Korea	52.7828	52.6337	55.5815	53.4052	48.5134	40.1358	40.1358	39.0133	33.8153	32.567	32.8651	32.1571	32.0776	29.673	29.845	27.2395	24.1192	21.3858	19.0419	17.0891	15.5521	14.2605	13.2832	12.427	11.8263	11.2782	10.7999	10.4559	10.229	10.0417	9.8195	9.6549	9.5321	9.3633	9.24	7.7809	7.8135	7.8223	7.8314	7.7912	7.8669	7.9346	7.9626	7.9868	8.0135	8.0606	7.9506	8.0324	8.0052
49 Taiwan	0	0	0	0	0	0	0	0	0	0	0	0	0.0014	0.0013	0.0013	0.0012	0.0011	0.0009	0.0008	0.0008	0.0007	0.0006	0.0006	0.0006	0.0005	0.0005	0.0005	0.0005	0.0005	0.0005	0.0004	0.0004	0.0004	0.0004	0.0004	0.0004	0.0004	0.0004	0.0004	0.0004	0.0004	0.0004	0.0004	0.0004	0.0004	0.0004	0.0004	0.0004	0.0004
50 Indonesia	4112.72	5655.12	6011.83	5966.3	6983.67	7800.58	9752.54	10373.1	11243.9	11125	10260.5	10419	10393.4	9480.21	9407.12	8473.65	7413.19	6502.28	5733.44	5100.32	4604.44	4190.94	3877	3603.8	3408.8	3231.96	3077.67	2963.73	2884.39	2817.21	2741.09	2681.98	2635.14	2576.17	2530.38	2120.1	2120.69	2114.75	2108.92	2089.83	2101.96	2111.79	2110.89	2108.92	2107.58	2111.59	2074.31	2087.47	2072.08
51 Rest of ASEAN	1126.09	1202.01	1303.11	1239.68	1367.95	1438.03	1521.08	1396.42	1346.93	1341.52	1320.04	1344.97	1341.67	924.549	724.775	522.183	377.418	282.433	217.904	173.046	141.752	118.49	101.742	88.4196	78.7906	70.6885	63.9615	58.7904	54.8171	51.4146	48.0941	45.3489	43.0234	40.6325	38.6296	30.666	29.9538	29.1671	28.4147	27.4916	27.0725	26.6319	26.0497	25.4743	24.9287	24.4741	23.4903	23.2029	22.5588
52 OPEC excl Venezuela	42.3768	45.0558	45.4506	44.0604	32.2368	30.4578	32.556	29.1066	30.7218	29.9166	33.7476	37.3566	37.2649	34.5384	34.7772	31.8042	28.222	25.0742	22.3678	20.1082	18.3271	16.8282	15.6935	14.6984	14.001	13.3641	12.808	12.4092	12.1476	11.9323	11.6755	11.4863	11.3462	11.1516	11.0105	9.2882	9.3301	9.3438	9.358	9.3136	9.4067	9.4904	9.5271	9.5592	9.5943	9.6538	9.5266	9.6273	9.5984
53 Rest of world	1578.61	1625.8	1556.65	1663.28	1569.9	1855.88	2066.03	1997.29	2015.54	1958.06	1940.01	2333.66	2327.86	2152.64	2165.11	1975.36	1748.27	1549.46	1379.07	1237.2	1125.57	1031.81	960.873	898.754	855.176	815.423	780.734	755.794	739.338	725.757	709.642	697.709	688.801	676.565	667.626	561.935	564.293	564.923	565.58	562.663	568.137	573.037	575.062	576.808	578.733	582.142	574.173	580.086	578.113
54 Ukraine	1445.62	1473.44	1586.39	1572.17	1458.25	1407.37	1684.65	1678.95	1703.72	1347.22	844.702	838.253	836.175	774.003	779.033	711.456	630.297	559.134	498.065	447.162	407.089	373.406	347.924	325.596	309.947	295.665	283.201	274.254	268.372	263.527	257.759	253.502	250.339	245.967	242.786	204.482	205.383	205.657	205.94	204.926	206.96	208.787	209.569	210.251	210.998	212.286	209.433	211.632	210.961
55 Saudi Arabia	0	0	0	0	0	0	0	0	0	0	0	0	0	0	0	0	0	0	0	0	0	0	0	0	0	0	0	0	0	0	0	0	0	0	0	0	0	0	0	0	0	0	0	0	0	0	0	0	0
56 Nigeria	0.2064	0.2064	0.5934	0.8256	0.8772	0.9804	0.8256	1.2384	1.1352	1.1868	1.2126	1.1868	1.1839	1.0972	1.1049	1.0104	0.8965	0.7965	0.7104	0.6386	0.582	0.5344	0.4983	0.4667	0.4445	0.4243	0.4066	0.3939	0.3856	0.3788	0.3706	0.3646	0.3602	0.354	0.3495	0.2948	0.2961	0.2966	0.297	0.2956	0.2986	0.3012	0.3024	0.3034	0.3045	0.3064	0.3024	0.3056	0.3047
57 South Africa	5793.07	5787.65	5861.55	5967.8	5899.53	6026.65	5975.54	6113.18	6072.3	6171.87	6051.29	6052.21	6035.47	5481.15	5469.61	4897.39	4243.79	3687.6	3222.69	2843.7	2550.18	2307.43	2125.27	1967.63	1856.86	1756.72	1669.83	1606.78	1564.14	1528.55	1487.44	1456.29	1432.32	1400.96	1377.33	1137.31	1140.3	1139.44	1138.63	1129.96	1139.77	1148.26	1150.4	1151.9	1153.78	1158.88	1139.14	1149.7	1143.07
58 Rest of Africa	101.815	97.0778	91.8953	69.4904	78.1885	80.0298	98.2088	208.911	235.21	330.445	301.441	216.27	215.743	200.015	201.35	184.204	163.543	145.375	129.744	116.685	106.385	97.7124	91.1435	85.3806	81.3394	77.6482	74.4245	72.1109	70.5915	69.3404	67.8487	66.7491	65.9333	64.8024	63.9813	54.0053	54.245	54.321	54.3996	54.1395	54.675	55.1565	55.3654	55.5481	55.7479	56.0889	55.3492	55.9281	55.7578
59 Africa OPEC	0	0	0	0	0	0	0	0	0	0	0	0	0.0036	0.0033	0.0033	0.003	0.0027	0.0024	0.0021	0.0019	0.0017	0.0016	0.0015	0.0014	0.0013	0.0013	0.0012	0.0012	0.0012	0.0011	0.0011	0.0011	0.0011	0.0011	0.001	0.0009	0.0009	0.0009	0.0009	0.0009	0.0009	0.0009	0.0009	0.0009	0.0009	0.0009	0.0009	0.0009	0.0009
60 Malaysia	20.7985	23.781	28.3736	33.0981	56.4304	63.2664	76.9649	77.8623	76.3842	70.9207	67.5423	59.6241	59.4778	54.9606	55.1863	50.3244	44.536	39.4718	35.1329	31.5197	28.6747	26.2846	24.4738	22.8879	21.772	20.7542	19.8656	19.224	18.7971	18.4434	18.0264	17.7152	17.4806	17.1627	16.9281	14.2606	14.3131	14.3219	14.3314	14.2512	14.3817	14.4976	14.5412	14.5778	14.6188	14.6969	14.49	14.6308	14.5741
61 Kazakhstan	1602.89	1777.85	1800.58	2045.07	1854	2032.57	2130.9	2209.09	2195.53	2090.88	1972.39	1892.64	1887.99	1748.49	1759.39	1607.77	1425.61	1265.73	1128.39	1013.8	923.503	847.552	790.047	739.633	704.269	671.984	643.798	623.549	610.22	599.231	586.16	576.503	569.315	559.398	552.174	465.565	467.574	468.163	468.774	466.452	471.021	475.121	476.859	478.369	480.027	482.905	476.429	481.367	479.82
0	Dan_1-5C_SO_covid_S3
RERY	Primary energy supply (before trade), PJ, NER x NR
	2005	2006	2007	2008	2009	2010	2011	2012	2013	2014	2015	2016	2017	2018	2019	2020	2021	2022	2023	2024	2025	2026	2027	2028	2029	2030	2031	2032	2033	2034	2035	2036	2037	2038	2039	2040	2041	2042	2043	2044	2045	2046	2047	2048	2049	2050	2051	2052	2053
1 Belgium	2.3944	0.6371	0	0	0	0.3626	0.3173	0.4533	0.476	0.4306	0.34	0.3173	0.3152	0.2688	0.2727	0.2263	0.1767	0.1386	0.1097	0.0884	0.0732	0.0617	0.0536	0.0471	0.0425	0.0389	0.0357	0.0335	0.0321	0.031	0.0297	0.0287	0.0281	0.0272	0.0265	0.0189	0.0191	0.0191	0.0192	0.019	0.0194	0.0197	0.0199	0.02	0.0202	0.0204	0.0199	0.0203	0.0202
2 Denmark	0	0	0	0	0	0	0	0	0	0	0	0	0.0069	0.0064	0.0064	0.0058	0.0052	0.0046	0.0041	0.0037	0.0033	0.0031	0.0028	0.0027	0.0025	0.0024	0.0023	0.0022	0.0022	0.0022	0.0021	0.0021	0.002	0.002	0.002	0.0017	0.0017	0.0017	0.0017	0.0017	0.0017	0.0017	0.0017	0.0017	0.0017	0.0017	0.0017	0.0017	0.0017
3 Germany	2363.79	2228.23	2276.17	2095.79	1942.03	1921.99	1955.12	1992.76	1886.35	1847.75	1800.49	1663.2	1658.94	1531.43	1541.6	1403.51	1238.48	1094.43	971.386	869.207	789.159	721.949	671.344	627.827	595.474	567.898	543.212	525.593	514.162	504.647	493.398	485.059	478.798	470.804	464.262	389.534	391.227	391.733	392.376	390.335	394.572	398.065	399.884	401.063	402.384	404.744	399.284	403.511	402.156
4 Greece	357.469	342.075	351.233	340.364	342.311	306.282	314.215	336.815	281.699	267.292	237.612	166.323	165.403	140.097	141.653	116.811	90.5807	70.5861	55.585	44.5435	36.7452	30.8384	26.709	23.4402	21.0917	19.2472	17.6347	16.525	15.8342	15.255	14.5909	14.117	13.7765	13.3368	12.9617	9.2071	9.2913	9.3217	9.3485	9.2246	9.4639	9.6211	9.6974	9.7608	9.8381	9.9411	9.6844	9.8851	9.8257
5 Spain	262.293	253.256	228.451	175.603	159.555	138.013	110.896	103.026	73.8064	68.1698	52.1725	30.8225	30.7464	28.4724	28.6607	26.1865	23.2129	20.6025	18.361	16.4908	15.0196	13.7799	12.8439	12.0368	11.4357	10.9224	10.4622	10.1334	9.9202	9.7427	9.5325	9.3767	9.2598	9.1103	8.988	7.5793	7.6118	7.6219	7.6345	7.5964	7.677	7.7436	7.7784	7.8012	7.8267	7.8718	7.7691	7.8495	7.8244
6 France	16.042	11.752	10.972	7.202	3.822	6.786	3.874	7.54	8.138	7.8	0	0	0.0022	0.002	0.002	0.0019	0.0017	0.0015	0.0013	0.0012	0.0011	0.001	0.0009	0.0009	0.0008	0.0008	0.0008	0.0007	0.0007	0.0007	0.0007	0.0007	0.0007	0.0007	0.0007	0.0006	0.0006	0.0006	0.0006	0.0006	0.0006	0.0006	0.0006	0.0006	0.0006	0.0006	0.0006	0.0006	0.0006
7 Ireland	0	0	0	0	0	0	0	0	0	0	0	0	0.0007	0.0006	0.0006	0.0006	0.0005	0.0004	0.0004	0.0004	0.0003	0.0003	0.0003	0.0003	0.0002	0.0002	0.0002	0.0002	0.0002	0.0002	0.0002	0.0002	0.0002	0.0002	0.0002	0.0002	0.0002	0.0002	0.0002	0.0002	0.0002	0.0002	0.0002	0.0002	0.0002	0.0002	0.0002	0.0002	0.0002
8 Italy	2.5258	0.5583	4.2007	3.1107	1.9142	2.6853	2.446	2.127	1.9408	2.2865	2.1536	0	0.0084	0.0078	0.0079	0.0072	0.0064	0.0057	0.0051	0.0046	0.0042	0.0038	0.0036	0.0033	0.0032	0.003	0.0029	0.0028	0.0028	0.0027	0.0027	0.0026	0.0026	0.0025	0.0025	0.0021	0.0021	0.0021	0.0021	0.0021	0.0021	0.0022	0.0022	0.0022	0.0022	0.0022	0.0022	0.0022	0.0022
9 Luxembourg	0	0	0	0	0	0	0	0	0	0	0	0	0	0	0	0	0	0	0	0	0	0	0	0	0	0	0	0	0	0	0	0	0	0	0	0	0	0	0	0	0	0	0	0	0	0	0	0	0
10 Netherlands	0	0	0	0	0	0	0	0	0	0	0	0	0.0488	0.0452	0.0455	0.0416	0.0369	0.0328	0.0292	0.0263	0.024	0.022	0.0205	0.0192	0.0183	0.0175	0.0167	0.0162	0.0159	0.0156	0.0152	0.015	0.0148	0.0146	0.0144	0.0121	0.0122	0.0122	0.0122	0.0122	0.0123	0.0124	0.0125	0.0125	0.0126	0.0126	0.0125	0.0126	0.0126
11 Austria	0	0	0	0	0	0	0	0	0	0	0	0	0	0	0	0	0	0	0	0	0	0	0	0	0	0	0	0	0	0	0	0	0	0	0	0	0	0	0	0	0	0	0	0	0	0	0	0	0
12 Portugal	0	0	0	0	0	0	0	0	0	0	0	0	0	0	0	0	0	0	0	0	0	0	0	0	0	0	0	0	0	0	0	0	0	0	0	0	0	0	0	0	0	0	0	0	0	0	0	0	0
13 Finland	0	0	0	0	0	0	0	0	0	0	0	0	0	0	0	0	0	0	0	0	0	0	0	0	0	0	0	0	0	0	0	0	0	0	0	0	0	0	0	0	0	0	0	0	0	0	0	0	0
14 Sweden	0	0	0	0	0	0	0	0	0	0	0	0	0.0001	0.0001	0.0001	0.0001	0.0001	0.0001	0	0	0	0	0	0	0	0	0	0	0	0	0	0	0	0	0	0	0	0	0	0	0	0	0	0	0	0	0	0	0
15 UK	505.18	453.668	425.083	449.323	438.56	453.869	458.007	420.337	317.05	289.907	214.153	104.725	104.47	96.8978	97.5623	89.2967	79.3264	70.5487	62.992	56.6724	51.6922	47.4885	44.3107	41.5677	39.5233	37.7766	36.2094	35.0903	34.3654	33.7624	33.047	32.5176	32.1213	31.6129	31.1973	26.3638	26.4783	26.5156	26.5619	26.4337	26.7138	26.9455	27.0684	27.1498	27.2404	27.3986	27.0482	27.3279	27.2445
16 Czech Republic	986.828	999.037	996.626	953.968	873.085	871.947	879.324	848.802	744.039	710.876	708	674.892	673.248	620.56	621.314	565.297	499.356	441.837	392.688	351.814	319.682	292.661	272.204	254.587	241.39	230.109	220.001	212.687	207.813	203.707	198.946	195.334	192.545	189.096	186.224	156.938	157.354	157.308	157.315	156.284	157.679	158.78	159.232	159.436	159.692	160.343	158.004	159.37	158.602
17 Estonia	0	0	0	0	0	0	0	0	0	0	0	0	0	0	0	0	0	0	0	0	0	0	0	0	0	0	0	0	0	0	0	0	0	0	0	0	0	0	0	0	0	0	0	0	0	0	0	0	0
18 Cyprus	0	0	0	0	0	0	0	0	0	0	0	0	0	0	0	0	0	0	0	0	0	0	0	0	0	0	0	0	0	0	0	0	0	0	0	0	0	0	0	0	0	0	0	0	0	0	0	0	0
19 Latvia	0	0	0	0	0	0	0	0	0	0	0	0	0	0	0	0	0	0	0	0	0	0	0	0	0	0	0	0	0	0	0	0	0	0	0	0	0	0	0	0	0	0	0	0	0	0	0	0	0
20 Lithuania	0	0	0	0	0	0	0	0	0	0	0	0	0	0	0	0	0	0	0	0	0	0	0	0	0	0	0	0	0	0	0	0	0	0	0	0	0	0	0	0	0	0	0	0	0	0	0	0	0
21 Hungary	73.1914	73.5453	74.2241	70.9062	65.1485	66.7072	68.8915	67.2596	67.4795	66.4845	63.5675	61.2311	61.0715	55.4055	54.936	49.1949	42.7362	37.2377	32.6362	28.8738	25.9491	23.5192	21.6862	20.121	18.9448	17.9428	17.0495	16.3937	15.9422	15.557	15.1232	14.7854	14.5159	14.1969	13.926	11.5992	11.6006	11.5662	11.5359	11.426	11.503	11.5566	11.5602	11.5449	11.5335	11.552	11.3443	11.4173	11.3294
22 Malta	0	0	0	0	0	0	0	0	0	0	0	0	0	0	0	0	0	0	0	0	0	0	0	0	0	0	0	0	0	0	0	0	0	0	0	0	0	0	0	0	0	0	0	0	0	0	0	0	0
23 Poland	2882.9	2828.52	2616.28	2550.2	2362.09	2318.7	2332.85	2420.78	2392.16	2262.29	2255.29	2190.03	2184.7	2024.43	2036.69	1862.44	1653.05	1468.96	1310.68	1178.42	1074.24	986.353	919.901	862.564	819.798	783.256	750.475	727.02	711.761	699.04	684.003	672.832	664.425	653.705	644.915	544.755	546.988	547.625	548.446	545.659	551.312	555.959	558.357	559.896	561.623	564.744	557.37	562.999	561.136
24 Slovenia	49.5723	50.6419	51.8849	49.607	48.5596	50.0723	50.2627	45.7703	45.0042	34.2502	36.1088	39.4345	39.3357	35.7297	35.3958	31.7448	27.6364	24.129	21.186	18.7737	16.894	15.3293	14.1464	13.1349	12.3735	11.7238	11.1443	10.7178	10.4229	10.1709	9.8878	9.6666	9.4895	9.2807	9.103	7.5992	7.5979	7.5734	7.5516	7.4784	7.5257	7.558	7.5581	7.5458	7.5362	7.5458	7.4097	7.4544	7.3955
25 Slovakia	26.6744	23.5199	23.0585	26.1151	27.351	25.6824	25.188	23.7566	24.4641	24.2562	20.7376	18.9133	18.8448	9.0851	5.5903	3.2533	2.0199	1.3617	0.9737	0.7299	0.5722	0.4619	0.3864	0.3291	0.2877	0.2555	0.2287	0.209	0.1946	0.1824	0.1706	0.1611	0.1533	0.1453	0.1383	0.1034	0.1018	0.1001	0.0982	0.0953	0.0954	0.0949	0.0938	0.0926	0.0916	0.0908	0.0874	0.0874	0.0858
26 Bulgaria	174.922	180.342	201.436	203.441	192.529	206.819	259.975	234.911	200.444	214.349	244.994	213.593	213.071	196.89	197.624	180.228	159.544	141.437	125.922	112.992	102.819	94.2537	87.7741	82.1897	78.016	74.4494	71.2518	68.9513	67.4365	66.1668	64.6805	63.5646	62.7134	61.6451	60.7622	51.2505	51.4248	51.4482	51.4889	51.1897	51.6853	52.0853	52.273	52.3796	52.5037	52.758	52.0283	52.5178	52.305
27 Romania	242.556	271.213	287.137	291.449	274.796	247.142	278.92	265.682	194.955	186.257	197.245	177.268	176.83	162.62	162.641	147.629	130.07	114.812	101.816	91.0382	82.5813	75.4835	70.1141	65.4966	62.0367	59.0809	56.4344	54.5159	53.2318	52.1478	50.8961	49.9431	49.2034	48.2947	47.5356	39.9794	40.0735	40.0486	40.0372	39.7592	40.1047	40.3741	40.4767	40.5156	40.5678	40.7214	40.1081	40.445	40.2351
28 Norway	41.3351	67.2995	114.451	96.383	74.2121	54.3735	38.9466	34.5349	52.1255	47.0675	31.0786	22.9858	22.9296	20.9466	20.8269	18.7846	16.4501	14.4402	12.7415	11.3409	10.2451	9.3292	8.6359	8.0412	7.5939	7.2118	6.8703	6.6201	6.4488	6.303	6.1377	6.0095	5.9078	5.7863	5.6835	4.7643	4.7677	4.7568	4.7475	4.7065	4.7399	4.7641	4.7684	4.765	4.7632	4.7734	4.693	4.7249	4.6923
29 Switzerland	0	0	0	0	0	0	0	0	0	0	0	0	0	0	0	0	0	0	0	0	0	0	0	0	0	0	0	0	0	0	0	0	0	0	0	0	0	0	0	0	0	0	0	0	0	0	0	0	0
30 Iceland	0	0	0	0	0	0	0	0	0	0	0	0	0	0	0	0	0	0	0	0	0	0	0	0	0	0	0	0	0	0	0	0	0	0	0	0	0	0	0	0	0	0	0	0	0	0	0	0	0
31 Croatia	0	0	0	0	0	0	0	0	0	0	0	0	0	0	0	0	0	0	0	0	0	0	0	0	0	0	0	0	0	0	0	0	0	0	0	0	0	0	0	0	0	0	0	0	0	0	0	0	0
32 Turkey	442.744	542.11	628.418	685.518	700.789	700.903	695.852	651.228	566.957	578.352	535.846	648.854	647.047	572.38	557.908	487.506	413.133	352.01	302.37	262.766	232.505	207.8	189.309	173.715	162.005	152.089	143.325	136.82	132.217	128.258	123.925	120.481	117.667	114.458	111.698	91.5803	91.3114	90.742	90.2096	89.0178	89.3794	89.5422	89.2883	88.878	88.5007	88.3669	86.3963	86.7107	85.7217
33 Macedonia	0	0	0	0	0	0	0	0	0	0	0	0	0	0	0	0	0	0	0	0	0	0	0	0	0	0	0	0	0	0	0	0	0	0	0	0	0	0	0	0	0	0	0	0	0	0	0	0	0
34 USA	23667.2	24181.5	23801.8	24254.1	22195.7	22267.1	22456.4	20745	19978.8	20307.3	18056.9	14589.5	14553.9	13494.7	13586.1	12430.7	11038.2	9812.94	8758.67	7877.39	7183.12	6597.31	6154.53	5772.43	5487.66	5244.39	5026.13	4870.27	4769.26	4685.21	4585.55	4511.77	4456.51	4385.65	4327.73	3655.81	3671.6	3676.68	3683	3665.07	3703.88	3735.96	3752.92	3764.11	3776.57	3798.43	3749.63	3788.37	3776.67
35 Japan	27.1264	29.3437	27.7818	28.0143	26.196	24.8631	25.9558	27.0698	30.5179	32.1598	30.8628	31.4259	31.3492	29.0593	29.252	26.7567	23.7518	21.1091	18.8361	16.9366	15.4406	14.1786	13.2248	12.4018	11.7884	11.2644	10.7943	10.4585	10.2407	10.0595	9.8446	9.6855	9.5662	9.4133	9.2884	7.8443	7.8778	7.8884	7.9016	7.8627	7.9456	8.0141	8.0502	8.0738	8.1002	8.1467	8.0415	8.1243	8.0988
36 Canada	1446.67	1450.18	1554.77	1411.55	1288.91	1421.22	1413.34	1407.17	1472.57	1453.85	1288.31	1257.04	1253.97	1162.43	1169.97	1070.24	950.185	844.587	753.746	677.823	618.013	567.551	529.403	496.484	471.943	450.976	432.166	418.722	409.997	402.731	394.125	387.746	382.958	376.833	371.82	314.086	315.415	315.824	316.338	314.771	318.075	320.8	322.227	323.158	324.199	326.045	321.829	325.123	324.09
37 Australia	8439.69	8533.05	9000.75	9039.73	9350.5	10323.1	9782.07	10272.4	11074.8	11950.8	12501	12226.8	12197	11305.7	11378.4	10407.8	9239.53	8212.08	7328.31	6589.74	6007.93	5517.08	5146.02	4825.84	4587.13	4383.19	4200.23	4069.45	3984.54	3913.83	3830.1	3768.02	3721.41	3661.8	3613.01	3051.82	3064.69	3068.61	3073.56	3058.28	3090.34	3116.77	3130.58	3139.59	3149.65	3167.53	3126.51	3158.48	3148.38
38 New Zealand	132.462	142.527	118.567	118.784	111.111	131.361	121.159	120.698	114.687	97.9343	81.024	68.3284	68.1587	63.0432	63.4179	57.8741	51.2369	45.4221	40.4374	36.2841	33.0198	30.2717	28.197	26.4095	25.0774	23.9402	22.9209	22.1917	21.717	21.3211	20.8538	20.5063	20.2446	19.9114	19.6381	16.5461	16.6137	16.6321	16.6562	16.5692	16.7421	16.8841	16.9567	17.0029	17.0549	17.1498	16.9214	17.0935	17.0349
39 Russian Federation	6574.68	6657.81	6809.95	6991.92	6423.52	6954.53	6875.74	7738.53	7700.05	7932.73	8375.27	8745.14	8723.84	8088.72	8142.96	7450.4	6615.85	5881.58	5249.76	4721.61	4305.52	3954.42	3689.03	3460	3289.3	3143.46	3012.62	2919.17	2858.58	2808.16	2748.39	2704.12	2670.95	2628.44	2593.68	2191.11	2200.53	2203.53	2207.27	2196.48	2219.69	2238.86	2248.97	2255.63	2263.05	2276.09	2246.81	2269.97	2262.91
40 Rest of Annex I	0	0	0	0	0	0	0	0	0	0	0	0	0	0	0	0	0	0	0	0	0	0	0	0	0	0	0	0	0	0	0	0	0	0	0	0	0	0	0	0	0	0	0	0	0	0	0	0	0
41 China	51373.4	55862.4	60779.1	62263	65631.7	72117.2	78026.3	77583.2	79317.4	79620.1	78826.4	71967.1	71788.6	66103.8	66213.3	60169.5	53059.9	46870.6	41592	37210.2	33771.7	30884.3	28701.6	26824.1	25419.5	24219.8	23145.6	22369.6	21853.7	21419.6	20915.6	20534.1	20240.1	19875.8	19572.8	16459.9	16506.3	16503.5	16506.4	16398.9	16549.4	16668.6	16718.9	16742.8	16772.2	16843.8	16597	16744.7	16665.2
42 India	6837.39	7152.76	7584.26	8182.75	8868.59	8912.63	9292.77	9800.64	9933.98	10605.7	11034.7	11223.6	11195.8	10341.8	10388.2	9468.56	8373.69	7416.14	6596.43	5914.08	5377.92	4926.85	4586.09	4292.6	4073.57	3886.53	3718.92	3598.6	3519.67	3453.64	3376.15	3318.16	3274.11	3218.58	3172.79	2672.04	2681.8	2683.61	2686.33	2671.14	2697.84	2719.52	2730.02	2736.24	2743.39	2757.42	2719.49	2745.94	2735.31
43 Mexico	296.45	336.364	357.051	318.329	276.83	335.186	434.123	332.631	321.405	324.566	241.761	291.395	290.672	268.171	269.111	244.992	216.404	191.448	170.118	152.382	138.456	126.748	117.903	110.29	104.603	99.7471	95.3971	92.2674	90.2048	88.4754	86.4539	84.9348	83.7747	82.3216	81.1199	68.2673	68.497	68.5231	68.5725	68.1637	68.8264	69.3603	69.6078	69.746	69.9076	70.2449	69.2555	69.9097	69.6172
44 Brazil	103.971	95.7789	98.3746	111.406	93.7561	88.1214	89.34	105.389	138.101	128.119	128.386	110.353	110.08	101.849	102.472	93.5421	82.841	73.4608	65.4164	58.7112	53.4401	49.0016	45.6506	42.7628	40.6111	38.7741	37.1275	35.95	35.184	34.5456	33.7914	33.2311	32.8095	32.2721	31.8316	26.825	26.9361	26.9674	27.008	26.8684	27.1501	27.3817	27.5009	27.5773	27.6631	27.8184	27.4499	27.7304	27.6369
45 Argentina	0.6176	3.483	2.7172	3.977	2.0256	1.6056	2.2232	2.3467	2.0503	1.408	0.8399	0.5681	0.5667	0.5244	0.5281	0.4822	0.4269	0.3785	0.337	0.3024	0.2752	0.2523	0.2351	0.2202	0.2091	0.1997	0.1912	0.1852	0.1813	0.178	0.1742	0.1713	0.1692	0.1665	0.1642	0.1383	0.1389	0.1391	0.1394	0.1387	0.1402	0.1414	0.1421	0.1425	0.143	0.1439	0.142	0.1435	0.143
46 Colombia	1607.37	1785.13	1902.31	2000.28	1981.37	2023.36	2335.04	2422.7	2326.69	2410.56	2328.1	2463.19	2456.38	2227.82	2220.42	1985.68	1718.82	1492.06	1302.82	1148.65	1029.47	930.776	856.863	793.917	747.049	707.262	671.866	646.252	629.054	614.54	597.917	585.227	575.336	563.308	553.245	457.015	458.008	457.503	457.168	453.487	457.629	460.815	461.901	462.185	462.634	464.353	456.463	460.476	457.642
47 Rest of Latin America	232.449	227.587	193.982	165.59	119.622	96.6329	79.2346	55.2204	85.5831	112.849	85.3175	72.6889	72.5102	67.1812	67.6316	61.8274	54.8432	48.7067	43.4332	39.03	35.5644	32.6427	30.4357	28.5322	27.1141	25.9031	24.817	24.0413	23.5384	23.1199	22.6239	22.2566	21.9812	21.6286	21.3402	18.0076	18.0851	18.1096	18.1402	18.0506	18.2422	18.4004	18.4837	18.5384	18.5995	18.707	18.4645	18.6557	18.5969
48 Korea	52.7828	52.6337	55.5815	53.4052	48.5134	40.1358	40.1358	39.0133	33.8153	32.567	32.8651	32.1571	32.0776	29.6729	29.845	27.2394	24.1201	21.3864	19.0423	17.0886	15.5526	14.2594	13.2828	12.4412	11.8139	11.2783	10.7982	10.4546	10.2308	10.0441	9.8237	9.6598	9.5363	9.3791	9.2501	7.795	7.8265	7.8349	7.8459	7.8047	7.8857	7.9522	7.9861	8.0075	8.0316	8.076	7.9682	8.0489	8.021
49 Taiwan	0	0	0	0	0	0	0	0	0	0	0	0	0.0014	0.0013	0.0013	0.0012	0.0011	0.0009	0.0008	0.0008	0.0007	0.0006	0.0006	0.0006	0.0005	0.0005	0.0005	0.0005	0.0005	0.0005	0.0004	0.0004	0.0004	0.0004	0.0004	0.0004	0.0004	0.0004	0.0004	0.0004	0.0004	0.0004	0.0004	0.0004	0.0004	0.0004	0.0004	0.0004	0.0004
50 Indonesia	4112.72	5655.12	6011.83	5966.3	6983.67	7800.58	9752.54	10373.1	11243.9	11125	10260.5	10419	10393.4	9480.18	9407.1	8473.63	7413.46	6502.45	5733.56	5100.15	4604.61	4190.6	3876.89	3607.91	3405.21	3231.99	3077.2	2963.36	2884.89	2817.86	2742.28	2683.34	2636.29	2580.51	2533.12	2123.91	2124.17	2118.1	2112.76	2093.36	2106.91	2116.36	2116.98	2114.24	2112.19	2115.42	2078.7	2091.54	2075.94
51 Rest of ASEAN	1126.09	1202.01	1303.11	1239.68	1367.95	1438.03	1521.08	1396.42	1346.93	1341.52	1320.04	1344.97	1341.67	924.546	724.775	522.182	377.434	282.44	217.907	173.038	141.757	118.478	101.739	88.5318	78.6923	70.6884	63.95	58.7816	54.8278	51.4276	48.1168	45.3735	43.0425	40.7081	38.6726	30.7239	30.0045	29.2134	28.4659	27.5359	27.1368	26.6872	26.1248	25.5356	24.9781	24.5109	23.5332	23.2395	22.5918
52 OPEC excl Venezuela	42.3768	45.0558	45.4506	44.0604	32.2368	30.4578	32.556	29.1066	30.7218	29.9166	33.7476	37.3566	37.2649	34.5383	34.7771	31.8041	28.223	25.0749	22.3683	20.1076	18.3278	16.8269	15.6931	14.715	13.9864	13.3642	12.8061	12.4076	12.1496	11.935	11.6805	11.4921	11.3511	11.1703	11.0225	9.3049	9.3456	9.3588	9.3752	9.3296	9.4291	9.5114	9.555	9.5839	9.616	9.6722	9.5477	9.647	9.6173
53 Rest of world	1578.61	1625.8	1556.65	1663.28	1569.9	1855.88	2066.03	1997.29	2015.54	1958.06	1940.01	2333.66	2327.86	2152.64	2165.11	1975.35	1748.33	1549.5	1379.1	1237.16	1125.61	1031.72	960.844	899.783	854.277	815.43	780.615	755.699	739.466	725.925	709.95	698.066	689.104	677.71	668.358	562.955	565.233	565.835	566.63	563.639	569.504	574.313	576.76	578.306	580.049	583.253	575.448	581.283	579.258
54 Ukraine	1445.62	1473.44	1586.39	1572.17	1458.25	1407.37	1684.65	1678.95	1703.72	1347.22	844.702	838.253	836.174	774.001	779.032	711.453	630.32	559.148	498.075	447.147	407.104	373.376	347.914	325.968	309.622	295.667	283.157	274.22	268.418	263.588	257.871	253.632	250.45	246.382	243.053	204.853	205.725	205.988	206.322	205.281	207.457	209.251	210.188	210.797	211.478	212.691	209.898	212.069	211.379
55 Saudi Arabia	0	0	0	0	0	0	0	0	0	0	0	0	0	0	0	0	0	0	0	0	0	0	0	0	0	0	0	0	0	0	0	0	0	0	0	0	0	0	0	0	0	0	0	0	0	0	0	0	0
56 Nigeria	0.2064	0.2064	0.5934	0.8256	0.8772	0.9804	0.8256	1.2384	1.1352	1.1868	1.2126	1.1868	1.1839	1.0972	1.1048	1.0104	0.8965	0.7965	0.7104	0.6386	0.582	0.5343	0.4983	0.4672	0.4441	0.4243	0.4065	0.3939	0.3857	0.3789	0.3708	0.3648	0.3603	0.3546	0.3499	0.2953	0.2966	0.297	0.2976	0.2961	0.2993	0.3019	0.3033	0.3042	0.3052	0.307	0.303	0.3062	0.3053
57 South Africa	5793.07	5787.65	5861.55	5967.8	5899.53	6026.65	5975.54	6113.18	6072.3	6171.87	6051.29	6052.21	6035.47	5481.14	5469.6	4897.37	4243.96	3687.7	3222.77	2843.6	2550.29	2307.22	2125.2	1970.11	1854.71	1756.74	1669.55	1606.56	1564.43	1528.93	1488.15	1457.11	1433.01	1403.56	1378.97	1139.56	1142.36	1141.43	1140.93	1132.07	1142.74	1151.03	1154.08	1155.13	1156.59	1161.23	1141.85	1152.22	1145.48
58 Rest of Africa	101.815	97.0778	91.8953	69.4904	78.1885	80.0298	98.2088	208.911	235.21	330.445	301.441	216.27	215.742	200.015	201.349	184.204	163.549	145.379	129.746	116.681	106.388	97.7046	91.1408	85.4768	81.2553	77.6488	74.4133	72.102	70.6034	69.3561	67.8778	66.7827	65.9619	64.9105	64.0505	54.1021	54.3342	54.4076	54.4994	54.2321	54.8048	55.2777	55.5269	55.6906	55.8733	56.1948	55.4708	56.0422	55.8671
59 Africa OPEC	0	0	0	0	0	0	0	0	0	0	0	0	0.0036	0.0033	0.0033	0.003	0.0027	0.0024	0.0021	0.0019	0.0017	0.0016	0.0015	0.0014	0.0013	0.0013	0.0012	0.0012	0.0012	0.0011	0.0011	0.0011	0.0011	0.0011	0.001	0.0009	0.0009	0.0009	0.0009	0.0009	0.0009	0.0009	0.0009	0.0009	0.0009	0.0009	0.0009	0.0009	0.0009
60 Malaysia	20.7985	23.781	28.3736	33.0981	56.4304	63.2664	76.9649	77.8623	76.3842	70.9207	67.5423	59.6241	59.4778	54.9605	55.1862	50.3242	44.5376	39.4728	35.1336	31.5186	28.6758	26.2825	24.473	22.9139	21.7493	20.7544	19.8626	19.2216	18.8004	18.4476	18.0341	17.7242	17.4883	17.1915	16.9465	14.2863	14.3366	14.3448	14.3578	14.2756	14.4159	14.5295	14.5837	14.6152	14.6516	14.7245	14.5217	14.6605	14.6025
61 Kazakhstan	1602.89	1777.85	1800.58	2045.07	1854	2032.57	2130.9	2209.09	2195.53	2090.88	1972.39	1892.64	1887.99	1748.49	1759.39	1607.76	1425.67	1265.76	1128.41	1013.76	923.537	847.484	790.023	740.471	703.536	671.99	643.7	623.472	610.324	599.368	586.413	576.795	569.564	560.336	552.774	466.403	468.346	468.912	469.638	467.253	472.144	476.17	478.256	479.601	481.11	483.82	477.48	482.353	480.764
[truncated: 12 more columns]

## Sheet: Oil
0	Dan_baIEA_covid_S3
RERY	Primary energy supply (before trade), PJ, NER x NR
	2005	2006	2007	2008	2009	2010	2011	2012	2013	2014	2015	2016	2017	2018	2019	2020	2021	2022	2023	2024	2025	2026	2027	2028	2029	2030	2031	2032	2033	2034	2035	2036	2037	2038	2039	2040	2041	2042	2043	2044	2045	2046	2047	2048	2049	2050	2051	2052	2053
1 Belgium	0	0	0	0	0	0	0	0	0	0	0	0	0	0	0	0	0	0	0	0	0	0	0	0	0	0	0	0	0	0	0	0	0	0	0	0	0	0	0	0	0	0	0	0	0	0	0	0	0
2 Denmark	796.231	724.077	652.267	603.505	554.829	522.751	470.463	429.14	373.369	349.633	330.662	297.748	322.363	310.052	300.791	278.167	264.752	254.721	249.683	242.074	234.126	225.401	216.783	208.057	199.747	191.549	182.42	173.869	165.965	158.644	151.873	145.635	139.89	134.546	129.677	125.237	121.175	117.432	113.976	110.78	107.837	105.091	102.567	100.248	98.1156	96.066	93.5799	91.045	88.6279
3 Germany	149.076	145.242	144.184	129.817	117.795	105.667	111.855	110.77	112.328	103.546	102.607	100.184	108.539	110.72	113.95	111.93	112.967	115.188	119.558	122.858	125.954	128.555	131.026	133.213	135.368	137.302	138.346	139.346	140.363	141.378	142.393	143.416	144.441	145.425	146.441	147.477	148.518	149.537	150.528	151.487	152.426	153.315	154.19	155.054	155.905	156.672	156.923	156.975	156.978
4 Greece	3.3961	3.1671	2.8237	2.2513	3.0526	4.3882	3.7395	3.5869	2.6711	2.4421	2.3658	6.7158	6.9558	6.8305	6.7453	6.506	6.3676	6.2732	6.2576	6.2189	6.1844	6.1428	6.1067	6.0695	6.0406	6.012	5.9538	5.9006	5.855	5.8161	5.7838	5.7585	5.7399	5.7254	5.7189	5.7194	5.7263	5.738	5.7538	5.7734	5.7972	5.8232	5.8534	5.8877	5.9259	5.9632	5.9712	5.9692	5.9667
5 Spain	7.0824	5.9304	6.0584	5.4185	4.4798	5.2478	4.2665	6.0584	15.7007	13.0128	9.8983	6.0158	7.2417	7.6582	8.2789	8.0127	8.2751	8.7618	9.6879	10.4603	11.2313	11.9276	12.6208	13.2691	13.927	14.5442	14.9417	15.3297	15.7231	16.1163	16.5083	16.9007	17.291	17.6653	18.0436	18.4213	18.7928	19.1497	19.4886	19.8074	20.1087	20.3825	20.639	20.8777	21.098	21.2781	21.2935	21.2402	21.1624
6 France	46.1607	45.134	41.6687	41.7115	38.4601	38.3318	38.289	34.5243	33.9253	32.7703	35.7221	34.8665	41.5086	44.0308	47.6523	46.5322	48.2412	51.1691	56.4801	61.0024	65.5612	69.7747	74.0314	78.1147	82.3235	86.3942	89.3506	92.3227	95.3957	98.5447	101.769	105.084	108.479	111.883	115.412	119.049	122.767	126.522	130.298	134.083	137.897	141.681	145.498	149.347	153.229	156.999	159.804	162.241	164.591
7 Ireland	0	0	0	0	0	0	0	0	0	0	0	0	0.0012	0.0012	0.0013	0.0013	0.0013	0.0014	0.0015	0.0016	0.0016	0.0017	0.0018	0.0019	0.0019	0.002	0.0021	0.0021	0.0022	0.0022	0.0023	0.0024	0.0024	0.0025	0.0025	0.0026	0.0027	0.0027	0.0028	0.0029	0.0029	0.003	0.0031	0.0031	0.0032	0.0033	0.0033	0.0034	0.0034
8 Italy	255.806	241.49	245.3	218.509	190.505	212.649	221.188	225.918	230.314	241.323	229.018	156.838	185.34	196.301	212.132	207.322	214.872	227.821	251.415	271.711	292.339	311.572	331.147	350.075	369.716	388.861	402.979	417.255	432.091	447.373	463.108	479.364	496.11	513.003	530.606	548.84	567.589	586.645	605.929	625.397	645.14	664.872	684.908	705.25	725.896	746.139	761.716	775.555	789.056
9 Luxembourg	0	0	0	0	0	0	0	0	0	0	0	0	0.0018	0.002	0.0021	0.0021	0.0022	0.0023	0.0026	0.0028	0.0031	0.0033	0.0035	0.0038	0.004	0.0042	0.0044	0.0046	0.0048	0.0049	0.0051	0.0053	0.0055	0.0057	0.006	0.0062	0.0064	0.0067	0.0069	0.0071	0.0074	0.0076	0.0079	0.0082	0.0084	0.0087	0.0089	0.0091	0.0093
10 Netherlands	63.7084	57.5596	88.3036	73.9137	56.0224	43.554	46.1587	47.4397	47.9094	65.1175	59.6194	40.846	44.7201	45.1367	46.0556	44.5057	44.417	44.8864	46.3545	47.3072	48.1465	48.7354	49.244	49.6016	49.9226	50.1226	49.9135	49.6772	49.4397	49.1926	48.9353	48.6711	48.3972	48.0956	47.7957	47.4917	47.1773	46.8431	46.4869	46.1083	45.7125	45.2899	44.8543	44.4066	43.9476	43.4553	42.7996	42.0881	41.3692
11 Austria	36.3279	36.6911	34.0145	38.5108	40.1153	38.3618	31.5177	35.7028	35.8184	40.4842	36.2956	33.3891	33.9797	33.6018	33.3116	32.651	32.2227	31.8915	31.7322	31.5077	31.2813	31.0297	30.7802	30.5199	30.2682	30.0095	29.6888	29.3736	29.0687	28.7724	28.4845	28.2054	27.9345	27.6679	27.4114	27.1637	26.9234	26.688	26.4566	26.2286	26.0049	25.7826	25.5647	25.3509	25.1411	24.929	24.6788	24.417	24.1557
12 Portugal	0	0	0	0	0	0	0	0	0	0	0	0	0	0	0	0	0	0	0	0	0	0	0	0	0	0	0	0	0	0	0	0	0	0	0	0	0	0	0	0	0	0	0	0	0	0	0	0	0
13 Finland	0	0	0	0	0	0	0	0	0	0	0	0	0	0	0	0	0	0	0	0	0	0	0	0	0	0	0	0	0	0	0	0	0	0	0	0	0	0	0	0	0	0	0	0	0	0	0	0	0
14 Sweden	0	0	0	0	0	0	0	0	0	0	0	0	0.0211	0.0223	0.0239	0.0235	0.0243	0.0257	0.0282	0.0304	0.0326	0.0346	0.0368	0.0388	0.0409	0.043	0.0446	0.0461	0.0478	0.0495	0.0512	0.053	0.0549	0.0568	0.0587	0.0608	0.0629	0.065	0.0672	0.0694	0.0717	0.074	0.0763	0.0786	0.081	0.0834	0.0853	0.0869	0.0886
15 UK	3350.73	3024.51	3051.45	2840.67	2724.57	2517.56	2106.57	1823.84	1667.88	1625.28	1857.41	1921.61	2031.19	2010.49	2005.13	1931.38	1900.06	1885.75	1901.3	1904.02	1905.4	1901.43	1897.02	1890.02	1883.84	1875.82	1856.59	1837.92	1820.62	1804.39	1789.2	1775.13	1762.07	1749.32	1737.91	1727.6	1718.13	1709.1	1700.37	1691.84	1683.64	1675.32	1667.35	1659.71	1652.38	1644.29	1629.46	1612.38	1595.1
16 Czech Republic	13.1022	11.1258	10.3509	10.164	9.324	7.4624	6.996	6.6144	6.5298	6.36	5.4272	4.9608	5.5368	5.1761	4.9177	4.3658	4.06	3.8536	3.7857	3.6742	3.5713	3.4629	3.3692	3.2814	3.2115	3.1482	3.0563	2.9784	2.9152	2.8638	2.8224	2.7896	2.7638	2.7415	2.7252	2.7133	2.7041	2.6956	2.687	2.6776	2.6675	2.6552	2.6421	2.6281	2.6131	2.5937	2.5505	2.4995	2.4475
17 Estonia	0	0	0	0	0	0	0	0	0	0	0	0	0.0487	0.052	0.0567	0.0554	0.0577	0.0616	0.0687	0.0748	0.081	0.0869	0.0928	0.0986	0.1046	0.1105	0.1149	0.1194	0.124	0.1288	0.1338	0.1389	0.1442	0.1495	0.1551	0.1609	0.1669	0.173	0.1792	0.1855	0.1919	0.1984	0.2049	0.2116	0.2184	0.2252	0.2305	0.2353	0.24
18 Cyprus	0	0	0	0	0	0	0	0	0	0	0	0	0.0028	0.0029	0.003	0.003	0.003	0.0031	0.0033	0.0034	0.0035	0.0036	0.0037	0.0038	0.0039	0.004	0.004	0.0041	0.0041	0.0042	0.0042	0.0043	0.0044	0.0044	0.0045	0.0045	0.0046	0.0047	0.0047	0.0048	0.0048	0.0049	0.005	0.005	0.0051	0.0051	0.0052	0.0052	0.0052
19 Latvia	0	0	0	0	0	0	0	0	0	0	0	0	0	0	0	0	0	0	0	0	0	0	0	0	0.0001	0.0001	0.0001	0.0001	0.0001	0.0001	0.0001	0.0001	0.0001	0.0001	0.0001	0.0001	0.0001	0.0001	0.0001	0.0001	0.0001	0.0001	0.0001	0.0001	0.0001	0.0001	0.0001	0.0001	0.0001
20 Lithuania	9.2102	7.7178	6.5881	5.4758	4.9197	4.9197	4.8769	4.3636	3.6791	3.508	3.1455	2.7085	3.0691	3.1867	3.3546	3.2841	3.3534	3.4787	3.7076	3.8892	4.063	4.2139	4.3589	4.4901	4.6192	4.7368	4.8101	4.8804	4.9506	5.0195	5.0871	5.1538	5.2192	5.281	5.3426	5.4033	5.4624	5.5185	5.5713	5.6206	5.6669	5.709	5.7483	5.785	5.819	5.8474	5.8534	5.8501	5.8437
21 Hungary	38.9628	37.0348	35.056	33.9079	33.0638	30.6812	27.5462	27.1282	25.0382	24.4112	26.0414	29.7616	30.6428	29.1783	27.9028	26.1928	24.8788	23.7539	22.8937	21.9939	21.1363	20.2937	19.4982	18.7341	18.0216	17.3417	16.6336	15.9704	15.3546	14.782	14.25	13.7572	13.3007	12.8746	12.4832	12.1236	11.7925	11.486	11.2018	10.9381	10.6943	10.4666	10.2567	10.0637	9.8862	9.7168	9.5156	9.3106	9.1145
22 Malta	0	0	0	0	0	0	0	0	0	0	0	0	0	0	0	0	0	0	0	0	0	0	0	0	0	0	0	0	0	0	0	0	0	0	0	0	0	0	0	0	0	0	0	0	0	0	0	0	0
23 Poland	35.4133	33.9335	30.5949	32.271	29.0072	29.2023	26.2367	28.9554	41.113	40.5963	39.5792	42.5425	44.267	42.5419	41.1664	38.8028	37.2098	35.9733	35.2936	34.4863	33.729	32.9511	32.2271	31.5171	30.8718	30.2438	29.4762	28.7581	28.0992	27.4914	26.9309	26.4163	25.9428	25.4971	25.0929	24.7243	24.3849	24.0664	23.7646	23.4765	23.2028	22.9347	22.6787	22.4332	22.1966	21.9521	21.6088	21.2364	20.8659
24 Slovenia	0	0	0	0	0	0	0	0	0	0	0	0	0.0001	0.0001	0.0001	0.0001	0.0001	0.0001	0.0001	0.0001	0.0001	0.0001	0.0001	0.0001	0.0001	0.0001	0.0001	0.0001	0.0001	0.0001	0.0001	0.0001	0.0001	0.0001	0.0001	0.0001	0.0001	0.0001	0.0001	0.0001	0.0001	0.0001	0.0001	0.0001	0.0001	0.0001	0.0001	0.0001	0.0001
25 Slovakia	1.2772	1.162	0.9086	0.7416	0.618	0.5356	0.618	0.4532	0.412	0.3708	0.412	0.3457	0.421	0.4459	0.4846	0.4671	0.4837	0.5153	0.5771	0.6303	0.6849	0.7359	0.788	0.8384	0.8908	0.9417	0.9771	1.0127	1.0496	1.0875	1.1262	1.1658	1.2064	1.2466	1.2882	1.3309	1.374	1.4171	1.4596	1.5013	1.5426	1.5822	1.6213	1.6596	1.697	1.7313	1.7499	1.762	1.7717
26 Bulgaria	1.2216	1.1402	1.0588	0.9773	1.018	0.9366	0.8958	0.9773	1.1402	1.0588	1.018	0.9773	1.1229	1.1752	1.2529	1.2241	1.2592	1.3223	1.4411	1.5432	1.6475	1.7447	1.844	1.9401	2.0401	2.1378	2.2087	2.2805	2.3554	2.4327	2.5125	2.595	2.6802	2.7662	2.856	2.9492	3.0451	3.1427	3.2414	3.341	3.4419	3.5427	3.645	3.7488	3.8541	3.9569	4.034	4.1015	4.1669
27 Romania	211.932	194.132	184.582	184.582	178.243	169.383	165.604	156.867	164.304	161.052	158.573	149.795	155.008	148.094	142.218	133.62	127.304	122.04	118.305	114.252	110.378	106.518	102.872	99.3478	96.0778	92.9472	89.5669	86.4081	83.4944	80.805	78.3299	76.0655	74.0006	72.1006	70.4031	68.8949	67.5613	66.381	65.3439	64.4426	63.6807	63.0325	62.52	62.141	61.893	61.7164	61.2535	60.7386	60.2839
28 Norway	5289.36	4874.78	4710.71	4510.35	4230.81	3627.7	3463.9	3115.18	2998.44	3129.22	3197.75	3369.08	3465.52	3355.58	3261.71	3115.13	3007.55	2916.88	2851.73	2778.28	2705.66	2631.14	2558.34	2485.83	2415.89	2346.77	2272.8	2201.48	2133.21	2067.68	2004.79	1944.48	1886.59	1830.68	1777.2	1725.95	1676.72	1629.25	1583.41	1539.11	1496.37	1454.93	1414.98	1376.47	1339.34	1303.1	1265.19	1227.57	1191.12
29 Switzerland	0	0	0	0	0	0	0	0	0	0	0	0	0	0	0	0	0	0	0	0	0	0.0001	0.0001	0.0001	0.0001	0.0001	0.0001	0.0001	0.0001	0.0001	0.0001	0.0001	0.0001	0.0001	0.0001	0.0001	0.0001	0.0001	0.0001	0.0001	0.0001	0.0001	0.0001	0.0001	0.0001	0.0001	0.0001	0.0001	0.0002
30 Iceland	0	0	0	0	0	0	0	0	0	0	0	0	0	0	0	0	0	0	0	0	0	0	0	0	0	0	0	0	0	0	0	0	0	0	0	0	0	0	0	0	0	0	0	0	0	0	0	0	0
31 Croatia	35.192	34.2168	32.5632	30.4008	28.4142	26.2416	24.708	23.3874	22.8336	23.0466	26.3694	29.1384	30.6556	27.476	24.928	21.9083	19.7798	18.1257	17.0162	15.9296	14.9742	14.0893	13.3082	12.5939	11.9648	11.3843	10.7666	10.2092	9.7094	9.2569	8.8449	8.4683	8.1217	7.7967	7.4971	7.2184	6.9568	6.7082	6.4706	6.2427	6.0246	5.8134	5.6113	5.4178	5.2325	5.0504	4.846	4.6415	4.446
32 Turkey	93.4135	89.3592	88.2836	89.3592	99.3707	110.962	104.837	103.45	106.3	109.261	111.257	113.907	124.134	123.216	124.104	118.124	116.582	116.978	120.895	123.712	126.622	129.089	131.657	134.018	136.578	138.967	139.873	140.84	141.971	143.221	144.579	146.051	147.616	149.171	150.856	152.635	154.467	156.287	158.067	159.79	161.47	163.035	164.554	166.022	167.431	168.617	168.644	168.213	167.649
33 Macedonia	0	0	0	0	0	0	0	0	0	0	0	0	0	0	0	0	0	0	0	0	0	0	0	0	0	0	0	0	0	0	0	0	0	0	0	0	0	0	0	0	0	0	0	0	0	0	0	0	0
34 USA	11049.7	10886.9	10806.2	10592	11438.4	11690.6	12040.8	13900.6	15931.6	18677.7	19788.3	18695.7	21820.7	22971.7	24637.3	24077.9	24845.7	26184.4	28639.1	30723.9	32826.1	34767.3	36729.7	38612.1	40555.1	42434.8	43791.4	45156.4	46570.3	48021.3	49509.4	51041.4	52613.4	54191	55829.9	57521.6	59254.1	61006.1	62769.9	64540.7	66327	68101.1	69893	71703	73530.1	75306	76620.8	77759.6	78858
35 Japan	13.4114	11.9185	12.1156	12.3449	11.2139	10.604	10.2904	10.1816	9.525	9.416	8.6247	7.8757	8.0671	7.7501	7.4701	7.0932	6.7981	6.541	6.3376	6.1228	5.9141	5.7062	5.5059	5.3103	5.1238	4.9426	4.7557	4.5772	4.4079	4.2469	4.0938	3.9485	3.8104	3.6785	3.5536	3.4353	3.3228	3.2157	3.1134	3.0158	2.9228	2.8336	2.7487	2.6679	2.5908	2.5165	2.4391	2.3629	2.2896
36 Canada	4471.85	4835.36	4582.55	4607.41	4340.87	4623.25	4898.68	5342.85	5791.75	6393.04	6616.19	6762.79	7867.59	8278.6	8867.42	8679.8	8954.54	9426.67	10281.7	11004.5	11729.5	12396.5	13067.9	13710	14370.1	15007.1	15468.3	15931.5	16410.2	16900.5	17402.3	17918	18446.1	18975.6	19524.6	20090.5	20669.3	21254.1	21842.5	22433.1	23028.8	23620.5	24218.3	24822.2	25432.1	26025.9	26471.8	26861.8	27239.4
37 Australia	959.973	854.716	971.937	900.197	928.216	968.902	933.667	871.047	757.07	713.267	676.53	660.811	709.667	718.546	735.285	718.021	721.206	733.112	761.794	784.746	807.862	828.514	849.441	869.154	889.737	909.374	921.353	933.494	946.38	959.835	973.85	988.516	1003.77	1019.11	1035.33	1052.3	1069.84	1087.63	1105.55	1123.54	1141.71	1159.66	1177.8	1196.14	1214.66	1232.39	1243.59	1252.31	1260.44
38 New Zealand	37.0783	36.765	82.0259	118.865	112.353	107.793	92.3035	80.6092	69.1055	76.9879	81.0125	68.6763	72.8664	67.699	63.5191	57.4326	53.2854	50.0326	47.9354	45.6315	43.4736	41.3453	39.3742	37.493	35.775	34.1433	32.3854	30.7703	29.3004	27.9552	26.7214	25.5896	24.5476	23.5751	22.6827	21.8592	21.0941	20.3759	19.6982	19.0564	18.4498	17.8688	17.3188	16.7971	16.3015	15.8163	15.2639	14.7077	14.1743
39 Russian Federation	18900	19261	19699.4	19753.9	20058.5	20394.2	20699.2	20930.2	20932.6	21168.6	21468.9	21952.2	24386.1	24787.3	25551.6	24673.5	24780.1	25289.1	26552.9	27514.7	28452.2	29250.9	30035.9	30743.9	31466.1	32125.6	32447	32763.4	33098.5	33444.4	33800	34168.3	34546.2	34913.4	35300.6	35701.5	36108.5	36509.2	36899.2	37275.8	37643.1	37986.4	38321.4	38647.5	38963.8	39237.1	39274.1	39218.9	39138.1
40 Rest of Annex I	75.1075	74.8971	74.0555	73.214	72.3724	71.5309	70.7735	69.8478	69.2167	69.2167	69.2167	69.2167	80.638	84.524	90.3134	87.9047	90.3943	94.9917	103.722	111.093	118.531	125.367	132.276	138.874	145.684	152.238	156.816	161.408	166.16	171.028	176.008	181.122	186.354	191.571	196.979	202.542	208.21	213.904	219.59	225.248	230.907	236.462	242.021	247.581	253.136	258.436	262.011	264.903	267.604
41 China	7592.89	7735.78	7800.76	7973.34	7933.57	8499.79	8494.01	8686.69	8788.89	8852.11	8983.03	8360.41	9188.3	9354.95	9651.95	9376.86	9445.17	9658.09	10147.6	10538.1	10927.9	11274	11621.6	11946.6	12282.9	12601.1	12792.8	12985.4	13188.2	13398.3	13615.4	13840.8	14073.5	14305.2	14548.7	14801.4	15060.5	15321	15580.8	15838.9	16096.8	16348.4	16600.2	16852.1	17103.5	17339.7	17473.6	17567.6	17651.1
42 India	1377.38	1454.31	1459.88	1433.77	1441.56	1612.46	1629.83	1620.08	1616.91	1602.92	1580.71	1540.79	1597.13	1556.24	1523.66	1459.04	1416.2	1382.27	1362.32	1336.48	1310.14	1281.73	1253.4	1224.37	1195.98	1167.28	1135.12	1103.82	1073.61	1044.37	1016.05	988.659	962.122	936.226	911.242	887.078	863.642	840.812	818.545	796.814	775.649	754.934	734.785	715.188	696.129	677.383	657.724	638.153	619.097
43 Mexico	7746.15	7453.52	7035.63	6622.71	6143.36	6069.83	5982.51	5962.91	5841.82	5628.55	5090.6	4850.47	5016.47	4796.73	4610.12	4337.34	4136.8	3969.4	3849.43	3718.35	3591.6	3464.16	3342.09	3222.61	3109.5	2999.5	2882.55	2771.58	2667.09	2568.41	2475.19	2387.21	2304.06	2224.87	2150.33	2080	2013.43	1950.08	1889.67	1831.98	1776.99	1724.21	1673.92	1625.98	1580.28	1535.91	1488.32	1441	1395.44
44 Brazil	3529.44	3731.02	3800.15	3935.63	4225.35	4456.36	4562.56	4480.58	4386.14	4894.29	5289.44	5461.37	5917.93	5961.64	6072.73	5880.51	5871	5936.18	6139.8	6287.41	6430.23	6547.76	6662.79	6764.08	6868.06	6961.09	6994.38	7027.29	7064.04	7103.22	7144.66	7188.9	7235.39	7280.59	7329.91	7382.27	7436.33	7490	7542.48	7593.35	7643.36	7689.99	7735.97	7781.24	7825.68	7863.49	7860.9	7842.94	7821.22
45 Argentina	1420.75	1417.23	1379.34	1353.3	1339.86	1309.38	1250.22	1185.87	1129.51	1150.7	1151.2	1106.99	1171.74	1138.47	1113.67	1052.62	1015.79	988.244	975.101	954.948	933.813	910.199	886.513	862.005	838.168	814.045	786.389	759.759	734.415	710.221	687.129	665.139	644.182	624.027	604.96	586.885	569.697	553.267	537.538	522.476	508.107	494.296	481.167	468.701	456.88	445.42	432.747	420.056	407.874
46 Colombia	1145.81	1155.19	1155.19	1282.56	1460.07	1711.51	1993.33	2061.81	2122.6	2156.95	2190.02	1934.65	2075.77	1782.53	1565.68	1320.08	1162.86	1051.01	987.279	925.782	875.236	829.997	792.649	759.83	733.081	709.186	680.305	655.225	633.843	615.345	599.234	585.195	572.846	561.496	551.644	542.974	535.188	527.936	521.06	514.46	508.185	501.92	495.949	490.236	484.741	478.827	468.976	458.028	447.233
47 Rest of Latin America	9420.64	9558.19	8377.9	8505.6	8495.2	8414.63	8445.45	8269.02	8252.49	8079	7947.55	7257.37	8600.3	9108.73	9841.51	9611.39	9956.36	10550.1	11631.6	12554.9	13488.1	14352.8	15228.5	16070.6	16940.7	17784.2	18398.5	19017.2	19658.2	20316.3	20991.5	21686.8	22400.6	23117.6	23862.6	24631.8	25419.9	26217.5	27021.2	27829	28644.6	29455.6	30275.5	31104.4	31942	32757.7	33369.1	33902.7	34419
48 Korea	2.3058	1.9215	1.3237	0.8967	1.7934	2.2631	1.6653	1.5372	1.6653	1.1529	0.6832	0.6405	0.7758	0.7177	0.6723	0.5526	0.4885	0.4404	0.4109	0.3667	0.3205	0.2734	0.2305	0.1924	0.1613	0.1363	0.1154	0.1009	0.0917	0.0867	0.0848	0.0853	0.0877	0.0915	0.0964	0.1022	0.1088	0.1159	0.1235	0.1314	0.1397	0.1483	0.1573	0.1666	0.1763	0.1859	0.1929	0.1989	0.2046
49 Taiwan	0	0	0	0	0	0	0	0	0	0	0	0	0.0001	0.0001	0.0001	0.0001	0.0001	0.0001	0.0001	0.0001	0.0001	0.0002	0.0002	0.0002	0.0002	0.0002	0.0002	0.0002	0.0002	0.0002	0.0002	0.0002	0.0002	0.0002	0.0002	0.0002	0.0002	0.0002	0.0002	0.0003	0.0003	0.0003	0.0003	0.0003	0.0003	0.0003	0.0003	0.0003	0.0003
50 Indonesia	2195.1	2077.6	1970.9	2021.93	1957.51	1950	1864.5	1784.59	1704.13	1631.52	1623.5	1724.48	1787.13	1722.8	1669.63	1581.58	1519.86	1469.81	1437.73	1400.66	1364.78	1328.01	1292.87	1258.21	1225.7	1193.95	1158.2	1124.34	1092.68	1062.99	1035.17	1009.17	984.87	961.867	940.587	920.86	902.497	885.252	869	853.651	839.225	825.453	812.533	800.415	789.048	777.888	763.967	749.457	735.34
51 Rest of ASEAN	1702.22	1674.34	1609.26	1602.84	1631.89	1591.37	1536.67	1634	1606.88	1574	1581.24	1507.79	1608.39	1526.15	1467.12	1351.99	1284.06	1238.2	1225.84	1206.47	1190.28	1172.83	1158.36	1144.3	1133.58	1123.19	1103.56	1086.08	1071.27	1058.59	1047.78	1038.72	1031.11	1024.13	1018.61	1014.19	1010.5	1007.04	1003.58	999.959	996.249	991.956	987.502	982.826	977.871	971.66	958.795	943.573	927.926
52 OPEC excl Venezuela	24866.7	25753.5	25743.9	26493.2	24461.3	24797.9	26600.6	25923.8	25992.2	26126.4	27204.9	31729.8	32025.8	31473.6	30964.6	30295.2	29737.2	29226.5	28788	28322.3	27857	27384.7	26916.2	26447.9	25986.4	25527.3	25055.3	24591	24135.8	23689.2	23250.8	22820.8	22398.9	21984	21577.6	21179.1	20788.2	20404.2	20027	19656.2	19292.2	18934.2	18582.8	18238	17899.6	17566.4	17231.5	16900.2	16574.7
53 Rest of world	7081.6	7233.6	7482.87	7541.7	7806.96	7963.56	7594.06	7087.53	7050.56	6984.44	6798.38	6617.3	6801.56	6763.4	6750.9	6621.65	6563.08	6533.24	6555.39	6555.98	6554.75	6544.48	6533.79	6518.71	6505.36	6488.89	6451.75	6415.37	6381.28	6349.03	6318.6	6290.22	6263.73	6237.87	6214.67	6193.77	6174.73	6156.81	6139.73	6123.37	6108.02	6092.74	6078.57	6065.53	6053.58	6040.49	6012.93	5980.42	5947.41
54 Ukraine	132.5	140.579	139.275	133.973	122.192	108.643	102.584	96.3563	91.3912	85.9212	78.9785	68.291	78.1361	81.5947	86.6662	84.75	87.0025	91.0424	98.5618	104.902	111.273	117.121	123.012	128.631	134.41	139.97	143.914	147.867	151.952	156.13	160.399	164.779	169.255	173.723	178.349	183.102	187.946	192.817	197.691	202.552	207.426	212.23	217.051	221.888	226.738	231.407	234.748	237.574	240.267
55 Saudi Arabia	19831	19522.9	18691.5	19554.5	17352.5	17312.6	19741.4	20757.2	20433.2	20593.1	21610.5	22238.7	22401.9	22145.3	21909.2	21583.7	21315.7	21070.5	20861.4	20635	20406.2	20171.5	19936.5	19699.5	19464.1	19227.9	18983.4	18741.3	18502.1	18265.7	18031.9	17801	17572.8	17346.7	17123.6	16903.3	16685.6	16470.3	16257.2	16046.3	15837.8	15631.3	15427.3	15225.6	15026.3	14828.8	14630	14432.3	14236.9
56 Nigeria	5235.99	4954.08	4576.79	4381.52	4447.65	5107.07	4937.24	4860.5	4562.47	4551.36	4408.41	3800.25	3958.39	3822.64	3713.48	3515.67	3382.69	3277.63	3215.73	3139.86	3065.42	2987.44	2912.19	2836.97	2765.88	2695.62	2615.25	2538.74	2466.83	2399	2335.01	2274.81	2218.09	2163.98	2113.44	2066.08	2021.49	1979.14	1938.77	1900.2	1863.47	1828.05	1794.34	1762.26	1731.71	1701.56	1665.73	1628.81	1592.84
57 South Africa	28.4045	27.7157	0	0	11.7103	12.3181	12.3181	2.1476	2.6743	6.6048	10.3326	10.3731	10.9479	11.1373	11.4118	11.3013	11.419	11.6318	12.0264	12.3535	12.6793	12.9764	13.2751	13.56	13.8538	14.1376	14.3399	14.5442	14.7567	14.976	15.2021	15.4363	15.6782	15.9226	16.1785	16.4449	16.72	17.0008	17.2862	17.5758	17.8711	18.1678	18.471	18.7811	19.098	19.4107	19.6499	19.8624	20.0709
58 Rest of Africa	2031.05	2168.66	2372.23	2335.41	2423.45	2491.72	2530.38	1724.38	1692.69	1701.8	1683.59	1616.73	1826.99	1895.61	1998.41	1952.49	1995.29	2076.03	2230.7	2360.36	2490.86	2610.4	2731.1	2846.28	2965.22	3079.78	3159.7	3240.05	3323.49	3409.21	3497.21	3587.91	3681.05	3774.35	3871.45	3971.78	4074.51	4178.26	4282.5	4386.91	4492.03	4596.04	4700.88	4806.56	4912.99	5015.74	5088.38	5149.41	5207.62
59 Africa OPEC	8905.29	9424.57	10112.6	10390.9	9699.86	9661.99	6832.41	8873.04	7881.11	6766.23	6764.31	6597.63	6830.31	6581.11	6372.58	6037.31	5798.43	5601.86	5468.87	5317.02	5168.51	5016.35	4869.45	4724.01	4585.73	4450.02	4301.83	4160.48	4026.92	3900.35	3780.4	3666.91	3559.41	3456.68	3359.94	3268.65	3182.19	3099.83	3021.2	2946.03	2874.36	2805.44	2739.82	2677.35	2617.87	2559.92	2495.51	2430.62	2367.89
60 Malaysia	1512.54	1439.65	1422.15	1431.68	1371.05	1346.59	1185.9	1218.98	1196.42	1236.99	1358.23	1391.45	1443.66	1338.17	1247.22	1136.15	1050.9	978.621	921.868	864.648	811.044	759.749	712.118	667.355	626.156	587.623	549.492	514.455	482.424	453.083	426.198	401.579	379.015	358.216	339.212	321.818	305.858	291.153	277.58	265.036	253.459	242.704	232.778	223.612	215.144	207.174	198.84	190.759	183.177
61 Kazakhstan	2638.61	2812.99	2881	3032.42	3280.36	3415.81	3431.97	3398.23	3506.7	3465.5	3406.8	3345.7	3708.08	3827.06	4003.95	3927.24	4001.6	4140.23	4403.16	4622.6	4842.32	5042.85	5244.48	5436.26	5633.55	5823.04	5955.63	6088.7	6226.56	6367.94	6512.81	6661.88	6814.72	6967.7	7126.69	7290.74	7458.58	7628.02	7798.26	7968.81	8140.61	8310.74	8482.4	8655.59	8830.22	8999.34	9121.38	9225.48	9325.48
0	Dan_baIEA_QU_covid_S3
RERY	Primary energy supply (before trade), PJ, NER x NR
	2005	2006	2007	2008	2009	2010	2011	2012	2013	2014	2015	2016	2017	2018	2019	2020	2021	2022	2023	2024	2025	2026	2027	2028	2029	2030	2031	2032	2033	2034	2035	2036	2037	2038	2039	2040	2041	2042	2043	2044	2045	2046	2047	2048	2049	2050	2051	2052	2053
1 Belgium	0	0	0	0	0	0	0	0	0	0	0	0	0	0	0	0	0	0	0	0	0	0	0	0	0	0	0	0	0	0	0	0	0	0	0	0	0	0	0	0	0	0	0	0	0	0	0	0	0
2 Denmark	796.231	724.077	652.267	603.505	554.829	522.751	470.463	429.14	373.369	349.633	330.662	297.748	322.363	310.052	300.791	278.167	266.488	257.654	255.053	248.802	242.185	233.35	224.851	216.096	207.669	199.28	189.758	180.841	172.598	164.962	157.898	151.389	145.391	139.806	134.719	130.076	125.823	121.896	118.261	114.89	111.776	108.859	106.168	103.683	101.386	99.1712	96.4878	93.7523	91.1383
3 Germany	149.076	145.242	144.184	129.817	117.795	105.667	111.855	110.77	112.328	103.546	102.607	100.184	108.539	110.72	113.95	111.93	113.689	116.501	122.105	126.287	130.347	133.259	136.164	138.711	141.172	143.355	144.513	145.613	146.715	147.802	148.875	149.944	151.005	152.01	153.041	154.086	155.127	156.14	157.116	158.053	158.965	159.82	160.657	161.479	162.286	163.005	163.181	163.154	163.073
4 Greece	3.3961	3.1671	2.8237	2.2513	3.0526	4.3882	3.7395	3.5869	2.6711	2.4421	2.3658	6.7158	6.9558	6.8305	6.7453	6.506	6.3899	6.3149	6.3429	6.3388	6.345	6.3214	6.3092	6.294	6.2861	6.2766	6.2298	6.1876	6.1528	6.1244	6.1023	6.0868	6.0776	6.0719	6.074	6.0831	6.0982	6.1176	6.1405	6.1667	6.1966	6.2282	6.2634	6.3024	6.345	6.386	6.3939	6.3906	6.3863
5 Spain	7.0824	5.9304	6.0584	5.4185	4.4798	5.2478	4.2665	6.0584	15.7007	13.0128	9.8983	6.0158	7.2417	7.6582	8.2789	8.0127	8.4021	9.004	10.1951	11.1824	12.2039	13.0089	13.8426	14.6135	15.3817	16.0919	16.5323	16.9567	17.3808	17.7981	18.2077	18.6114	19.0065	19.3779	19.7483	20.1129	20.4655	20.7973	21.1048	21.3865	21.6456	21.8719	22.0765	22.2596	22.421	22.5385	22.4819	22.3542	22.2015
6 France	46.1607	45.134	41.6687	41.7115	38.4601	38.3318	38.289	34.5243	33.9253	32.7703	35.7221	34.8665	41.5086	44.0308	47.6523	46.5322	48.9256	52.4763	59.2089	64.8938	70.8192	75.666	80.7442	85.5779	90.495	95.2068	98.5623	101.917	105.36	108.861	112.422	116.057	119.756	123.439	127.238	131.135	135.099	139.082	143.065	147.041	151.03	154.968	158.926	162.906	166.906	170.777	173.6	176.025	178.353
7 Ireland	0	0	0	0	0	0	0	0	0	0	0	0	0.0012	0.0012	0.0013	0.0013	0.0013	0.0014	0.0015	0.0016	0.0017	0.0018	0.0019	0.002	0.0021	0.0022	0.0022	0.0023	0.0023	0.0024	0.0025	0.0025	0.0026	0.0027	0.0027	0.0028	0.0029	0.0029	0.003	0.0031	0.0031	0.0032	0.0033	0.0033	0.0034	0.0035	0.0035	0.0036	0.0036
8 Italy	255.806	241.49	245.3	218.509	190.505	212.649	221.188	225.918	230.314	241.323	229.018	156.838	185.34	196.301	212.132	207.322	217.871	233.583	263.552	289.152	316.08	338.35	361.856	384.426	407.556	429.911	446.098	462.385	479.193	496.389	513.977	532.033	550.521	569.052	588.276	608.1	628.39	648.914	669.591	690.376	711.379	732.287	753.445	774.868	796.556	817.76	833.847	848.042	861.843
9 Luxembourg	0	0	0	0	0	0	0	0	0	0	0	0	0.0018	0.002	0.0021	0.0021	0.0022	0.0024	0.0027	0.003	0.0034	0.0036	0.0039	0.0042	0.0044	0.0047	0.0049	0.0051	0.0053	0.0055	0.0057	0.006	0.0062	0.0064	0.0067	0.0069	0.0072	0.0074	0.0077	0.0079	0.0082	0.0085	0.0087	0.009	0.0093	0.0096	0.0098	0.01	0.0102
10 Netherlands	63.7084	57.5596	88.3036	73.9137	56.0224	43.554	46.1587	47.4397	47.9094	65.1175	59.6194	40.846	44.7201	45.1367	46.0556	44.5057	44.7531	45.4951	47.5356	48.8837	50.1434	50.836	51.4949	51.959	52.3528	52.5923	52.36	52.0912	51.8125	51.5156	51.201	50.8729	50.5294	50.1522	49.7737	49.3884	48.9901	48.5696	48.1253	47.6578	47.1728	46.6609	46.1366	45.6014	45.0563	44.4798	43.74	42.9476	42.1504
11 Austria	36.3279	36.6911	34.0145	38.5108	40.1153	38.3618	31.5177	35.7028	35.8184	40.4842	36.2956	33.3891	33.9797	33.6018	33.3116	32.651	32.2752	31.9882	31.9235	31.7692	31.6214	31.3982	31.1871	30.9596	30.7365	30.5016	30.1926	29.8877	29.5919	29.3032	29.0216	28.7477	28.4807	28.2164	27.9614	27.7144	27.4737	27.2368	27.0029	26.7716	26.5436	26.3161	26.0923	25.872	25.6551	25.4354	25.1757	24.9037	24.6322
12 Portugal	0	0	0	0	0	0	0	0	0	0	0	0	0	0	0	0	0	0	0	0	0	0	0	0	0	0	0	0	0	0	0	0	0	0	0	0	0	0	0	0	0	0	0	0	0	0	0	0	0
13 Finland	0	0	0	0	0	0	0	0	0	0	0	0	0	0	0	0	0	0	0	0	0	0	0	0	0	0	0	0	0	0	0	0	0	0	0	0	0	0	0	0	0	0	0	0	0	0	0	0	0
14 Sweden	0	0	0	0	0	0	0	0	0	0	0	0	0.0211	0.0223	0.0239	0.0235	0.0246	0.0263	0.0295	0.0322	0.0351	0.0375	0.04	0.0424	0.0449	0.0474	0.0492	0.051	0.0528	0.0547	0.0567	0.0587	0.0608	0.0628	0.065	0.0672	0.0695	0.0719	0.0742	0.0766	0.079	0.0815	0.0839	0.0864	0.089	0.0915	0.0934	0.0952	0.097
15 UK	3350.73	3024.51	3051.45	2840.67	2724.57	2517.56	2106.57	1823.84	1667.88	1625.28	1857.41	1921.61	2031.19	2010.49	2005.13	1931.38	1909.55	1903	1935.19	1949.89	1964.5	1964.75	1966.27	1964.13	1962.05	1957.28	1939.11	1921.28	1904.62	1888.82	1873.85	1859.82	1846.61	1833.5	1821.6	1810.7	1800.5	1790.59	1780.82	1771.12	1761.64	1751.9	1742.41	1733.18	1724.17	1714.33	1697.33	1677.97	1658.4
16 Czech Republic	13.1022	11.1258	10.3509	10.164	9.324	7.4624	6.996	6.6144	6.5298	6.36	5.4272	4.9608	5.5368	5.1761	4.9177	4.3658	4.1008	3.923	3.9177	3.8451	3.7841	3.6807	3.5998	3.5214	3.459	3.4005	3.3047	3.2229	3.1558	3.1001	3.0539	3.0158	2.9841	2.9549	2.9314	2.9117	2.8942	2.8768	2.8587	2.8393	2.819	2.7961	2.7723	2.7478	2.7223	2.6926	2.6381	2.576	2.5137
17 Estonia	0	0	0	0	0	0	0	0	0	0	0	0	0.0487	0.052	0.0567	0.0554	0.0586	0.0633	0.0723	0.08	0.0881	0.0949	0.102	0.1089	0.116	0.1229	0.128	0.1331	0.1383	0.1438	0.1493	0.155	0.1609	0.1668	0.1729	0.1793	0.1858	0.1925	0.1992	0.2059	0.2128	0.2197	0.2267	0.2338	0.2411	0.2482	0.2538	0.2588	0.2637
18 Cyprus	0	0	0	0	0	0	0	0	0	0	0	0	0.0028	0.0029	0.003	0.003	0.003	0.0031	0.0033	0.0035	0.0036	0.0037	0.0038	0.0039	0.004	0.0041	0.0042	0.0042	0.0043	0.0044	0.0044	0.0045	0.0045	0.0046	0.0047	0.0047	0.0048	0.0048	0.0049	0.005	0.005	0.0051	0.0051	0.0052	0.0052	0.0053	0.0053	0.0054	0.0054
19 Latvia	0	0	0	0	0	0	0	0	0	0	0	0	0	0	0	0	0	0	0	0	0	0	0	0.0001	0.0001	0.0001	0.0001	0.0001	0.0001	0.0001	0.0001	0.0001	0.0001	0.0001	0.0001	0.0001	0.0001	0.0001	0.0001	0.0001	0.0001	0.0001	0.0001	0.0001	0.0001	0.0001	0.0002	0.0002	0.0002
20 Lithuania	9.2102	7.7178	6.5881	5.4758	4.9197	4.9197	4.8769	4.3636	3.6791	3.508	3.1455	2.7085	3.0691	3.1867	3.3546	3.2841	3.3867	3.5401	3.8291	4.0547	4.2766	4.4436	4.61	4.7585	4.9015	5.0297	5.1069	5.1799	5.2517	5.3213	5.3885	5.4539	5.517	5.5756	5.6335	5.6899	5.7439	5.7945	5.8411	5.8839	5.9233	5.9581	5.99	6.0189	6.0451	6.0657	6.0636	6.0524	6.0382
21 Hungary	38.9628	37.0348	35.056	33.9079	33.0638	30.6812	27.5462	27.1282	25.0382	24.4112	26.0414	29.7616	30.6428	29.1783	27.9028	26.1928	24.9469	23.8738	23.1225	22.2957	21.5169	20.6929	19.9276	19.1873	18.4945	17.8296	17.123	16.4607	15.8453	15.2726	14.74	14.246	13.7878	13.3592	12.9651	12.6027	12.2683	11.9581	11.6694	11.4006	11.1514	10.9175	10.7012	10.5013	10.3169	10.1399	9.9276	9.7105	9.5021
22 Malta	0	0	0	0	0	0	0	0	0	0	0	0	0	0	0	0	0	0	0	0	0	0	0	0	0	0	0	0	0	0	0	0	0	0	0	0	0	0	0	0	0	0	0	0	0	0	0	0	0
23 Poland	35.4133	33.9335	30.5949	32.271	29.0072	29.2023	26.2367	28.9554	41.113	40.5963	39.5792	42.5425	44.267	42.5419	41.1664	38.8028	37.3599	36.2466	35.8344	35.2211	34.6789	33.9689	33.3403	32.7071	32.1255	31.5457	30.7883	30.076	29.4189	28.8087	28.2417	27.7166	27.2289	26.7644	26.3388	25.946	25.5794	25.2304	24.895	24.5704	24.2578	23.9483	23.649	23.3586	23.0758	22.7837	22.3883	21.9633	21.5404
24 Slovenia	0	0	0	0	0	0	0	0	0	0	0	0	0.0001	0.0001	0.0001	0.0001	0.0001	0.0001	0.0001	0.0001	0.0001	0.0001	0.0001	0.0001	0.0001	0.0001	0.0001	0.0001	0.0001	0.0001	0.0001	0.0001	0.0001	0.0001	0.0001	0.0001	0.0001	0.0001	0.0001	0.0001	0.0001	0.0001	0.0001	0.0001	0.0001	0.0001	0.0001	0.0001	0.0001
25 Slovakia	1.2772	1.162	0.9086	0.7416	0.618	0.5356	0.618	0.4532	0.412	0.3708	0.412	0.3457	0.421	0.4459	0.4846	0.4671	0.4919	0.5312	0.6113	0.68	0.7534	0.8137	0.8778	0.9392	1.0023	1.0627	1.1037	1.1445	1.1864	1.2288	1.2717	1.3152	1.3591	1.4022	1.4463	1.4911	1.536	1.5801	1.6231	1.6649	1.7055	1.7439	1.7812	1.8172	1.8518	1.8828	1.8964	1.9028	1.9066
26 Bulgaria	1.2216	1.1402	1.0588	0.9773	1.018	0.9366	0.8958	0.9773	1.1402	1.0588	1.018	0.9773	1.1229	1.1752	1.2529	1.2241	1.2747	1.3522	1.5045	1.6346	1.7724	1.886	2.0065	2.1223	2.2413	2.3564	2.4385	2.5213	2.6068	2.6944	2.7842	2.8765	2.9711	3.0659	3.1644	3.2661	3.3702	3.4755	3.5815	3.6879	3.7953	3.9021	4.01	4.119	4.2293	4.3367	4.4157	4.4841	4.5501
27 Romania	211.932	194.132	184.582	184.582	178.243	169.383	165.604	156.867	164.304	161.052	158.573	149.795	155.008	148.094	142.218	133.62	127.717	122.771	119.713	116.122	112.754	109.028	105.595	102.247	99.1344	96.1376	92.8011	89.6871	86.8215	84.1826	81.7614	79.5556	77.5542	75.7191	74.0958	72.6709	71.4281	70.3445	69.4093	68.6153	67.9677	67.4378	67.0511	66.8062	66.7015	66.6698	66.2965	65.8549	65.4721
28 Norway	5289.36	4874.78	4710.71	4510.35	4230.81	3627.7	3463.9	3115.18	2998.44	3129.22	3197.75	3369.08	3465.52	3355.58	3261.71	3115.13	3015.17	2930.34	2877.09	2811.3	2746.61	2673.39	2602.86	2531.78	2462.64	2393.74	2318.86	2246.53	2177.12	2110.36	2046.16	1984.46	1925.13	1867.72	1812.73	1759.98	1709.24	1660.25	1612.9	1567.1	1522.89	1480.01	1438.65	1398.77	1360.33	1322.82	1283.6	1244.72	1207.06
29 Switzerland	0	0	0	0	0	0	0	0	0	0	0	0	0	0	0	0	0	0	0	0	0.0001	0.0001	0.0001	0.0001	0.0001	0.0001	0.0001	0.0001	0.0001	0.0001	0.0001	0.0001	0.0001	0.0001	0.0001	0.0001	0.0001	0.0001	0.0001	0.0001	0.0001	0.0001	0.0001	0.0001	0.0002	0.0002	0.0002	0.0002	0.0002
30 Iceland	0	0	0	0	0	0	0	0	0	0	0	0	0	0	0	0	0	0	0	0	0	0	0	0	0	0	0	0	0	0	0	0	0	0	0	0	0	0	0	0	0	0	0	0	0	0	0	0	0
31 Croatia	35.192	34.2168	32.5632	30.4008	28.4142	26.2416	24.708	23.3874	22.8336	23.0466	26.3694	29.1384	30.6556	27.476	24.928	21.9083	19.8896	18.314	17.3704	16.3831	15.5279	14.6433	13.8762	13.1623	12.524	11.9253	11.2722	10.6789	10.1434	9.6552	9.2078	8.7964	8.4157	8.0574	7.7259	7.4168	7.1261	6.85	6.5864	6.3342	6.0935	5.8615	5.6404	5.4297	5.229	5.0334	4.8167	4.6015	4.397
32 Turkey	93.4135	89.3592	88.2836	89.3592	99.3707	110.962	104.837	103.45	106.3	109.261	111.257	113.907	124.134	123.216	124.104	118.124	117.581	118.856	124.766	129.156	133.886	137.103	140.659	143.88	147.215	150.258	151.47	152.702	154.065	155.507	157.017	158.604	160.245	161.827	163.511	165.259	167.024	168.738	170.374	171.915	173.382	174.698	175.939	177.104	178.188	179.022	178.617	177.732	176.706
33 Macedonia	0	0	0	0	0	0	0	0	0	0	0	0	0	0	0	0	0	0	0	0	0	0	0	0	0	0	0	0	0	0	0	0	0	0	0	0	0	0	0	0	0	0	0	0	0	0	0	0	0
34 USA	11049.7	10886.9	10806.2	10592	11438.4	11690.6	12040.8	13900.6	15931.6	18677.7	19788.3	18695.7	21820.7	22971.7	24637.3	24077.9	25166.6	26797	29917.8	32547.8	35292.1	37531.8	39882.3	42120	44399.5	46584.8	48132.2	49680.6	51272.4	52893.7	54544.8	56232.7	57953.3	59667.7	61440.2	63260.9	65115.7	66981.7	68850.6	70717.9	72593.8	74447.8	76313.3	78191.2	80081.2	81911.3	83238.5	84375.5	85466
35 Japan	13.4114	11.9185	12.1156	12.3449	11.2139	10.604	10.2904	10.1816	9.525	9.416	8.6247	7.8757	8.0671	7.7501	7.4701	7.0932	6.8128	6.5668	6.3861	6.1858	5.9922	5.7867	5.5909	5.3984	5.2138	5.0335	4.8452	4.6652	4.4942	4.3314	4.1765	4.0291	3.8889	3.7548	3.6278	3.5072	3.3926	3.2832	3.1787	3.0789	2.9836	2.8923	2.8052	2.7222	2.6432	2.5668	2.4872	2.4087	2.3332
36 Canada	4471.85	4835.36	4582.55	4607.41	4340.87	4623.25	4898.68	5342.85	5791.75	6393.04	6616.19	6762.79	7867.59	8278.6	8867.42	8679.8	9066.15	9638.82	10720.9	11627.2	12566.6	13330.7	14128.7	14885.8	15654	16388.7	16910.7	17432.3	17967.4	18511.5	19064.8	19629.6	20204.5	20777.1	21368.2	21974.7	22592.2	23213.3	23835.3	24457	25081.8	25700	26322.4	26949.4	27581.2	28194.5	28647.3	29040	29418.7
37 Australia	959.973	854.716	971.937	900.197	928.216	968.902	933.667	871.047	757.07	713.267	676.53	660.811	709.667	718.546	735.285	718.021	726.085	742.365	780.958	811.913	844.394	869.26	895.693	920.399	945.668	969.51	984.01	998.545	1013.73	1029.35	1045.41	1062	1079.06	1096.01	1113.78	1132.2	1151.09	1170.08	1189.06	1207.97	1226.94	1245.53	1264.21	1282.99	1301.85	1319.78	1330.61	1338.76	1346.24
38 New Zealand	37.0783	36.765	82.0259	118.865	112.353	107.793	92.3035	80.6092	69.1055	76.9879	81.0125	68.6763	72.8664	67.699	63.5191	57.4326	53.5872	50.5481	48.8953	46.8528	44.9568	42.8258	40.8907	39.0127	37.2759	35.605	33.7649	32.0683	30.5181	29.0933	27.7811	26.5726	25.4557	24.4093	23.4461	22.5546	21.7239	20.9423	20.2035	19.5031	18.8405	18.2063	17.6055	17.036	16.4954	15.968	15.3739	14.7789	14.2098
39 Russian Federation	18900	19261	19699.4	19753.9	20058.5	20394.2	20699.2	20930.2	20932.6	21168.6	21468.9	21952.2	24386.1	24787.3	25551.6	24673.5	25010.7	25719	27425.5	28727.8	30053.3	31002.7	31988.4	32868.8	33744	34531.7	34911.7	35279.1	35658.7	36041.5	36426.7	36817.9	37211.8	37586.2	37975.9	38374.4	38773	39158.9	39527.4	39876.3	40210.7	40515.2	40806.6	41085	41350	41567.3	41533	41401.9	41243.6
40 Rest of Annex I	75.1075	74.8971	74.0555	73.214	72.3724	71.5309	70.7735	69.8478	69.2167	69.2167	69.2167	69.2167	80.638	84.524	90.3134	87.9047	91.5761	97.2513	108.457	117.86	127.695	135.64	143.987	151.894	159.934	167.593	172.83	178.044	183.391	188.816	194.316	199.916	205.596	211.209	216.988	222.895	228.873	234.833	240.741	246.579	252.381	258.033	263.655	269.246	274.804	280.065	283.451	286.1	288.534
41 China	7592.89	7735.78	7800.76	7973.34	7933.57	8499.79	8494.01	8686.69	8788.89	8852.11	8983.03	8360.41	9188.3	9354.95	9651.95	9376.86	9526.73	9812.05	10465	10985.7	11526.9	11938.7	12372.5	12774.4	13182	13563	13790.1	14015.7	14249.5	14488.2	14731.5	14980.8	15234.9	15484.9	15745	16012.8	16284.7	16555.4	16822.9	17086.1	17347	17599	17849.1	18097.5	18343.8	18572.7	18690.9	18766.3	18830
42 India	1377.38	1454.31	1459.88	1433.77	1441.56	1612.46	1629.83	1620.08	1616.91	1602.92	1580.71	1540.79	1597.13	1556.24	1523.66	1459.04	1420.68	1390.18	1377.17	1355.75	1333.9	1306.1	1278.9	1250.48	1222.31	1193.48	1160.59	1128.48	1097.4	1067.23	1037.93	1009.52	981.936	954.969	928.916	903.689	879.196	855.321	832.025	809.288	787.144	765.484	744.42	723.944	704.049	684.508	664.081	643.786	624.048
43 Mexico	7746.15	7453.52	7035.63	6622.71	6143.36	6069.83	5982.51	5962.91	5841.82	5628.55	5090.6	4850.47	5016.47	4796.73	4610.12	4337.34	4149.87	3992.41	3892.94	3775.02	3661.9	3536.49	3418.15	3300.92	3188.97	3079.11	2960.23	2847.15	2740.4	2639.32	2543.58	2452.99	2367.18	2285.24	2207.97	2134.93	2065.65	1999.62	1936.54	1876.22	1818.66	1763.35	1710.6	1660.3	1612.31	1565.74	1515.86	1466.33	1418.66
44 Brazil	3529.44	3731.02	3800.15	3935.63	4225.35	4456.36	4562.56	4480.58	4386.14	4894.29	5289.44	5461.37	5917.93	5961.64	6072.73	5880.51	5913.61	6015.32	6299.22	6507.85	6719.7	6863.37	7013.38	7144.55	7274.89	7389.92	7433.38	7475.14	7519.65	7565.3	7612.01	7660.38	7709.86	7756.63	7806.81	7859.24	7912.45	7964.26	8013.87	8060.92	8106.33	8147.46	8187.24	8225.74	8262.87	8292.72	8279.59	8250.37	8217.11
45 Argentina	1420.75	1417.23	1379.34	1353.3	1339.86	1309.38	1250.22	1185.87	1129.51	1150.7	1151.2	1106.99	1171.74	1138.47	1113.67	1052.62	1020.66	996.692	990.801	975.058	958.377	935.068	912.295	888.198	864.422	840.044	811.489	783.939	757.667	732.536	708.511	685.601	663.742	642.695	622.782	603.905	585.957	568.801	552.386	536.681	521.716	507.35	493.714	480.796	468.577	456.761	443.659	430.552	417.99
46 Colombia	1145.81	1155.19	1155.19	1282.56	1460.07	1711.51	1993.33	2061.81	2122.6	2156.95	2190.02	1934.65	2075.77	1782.53	1565.68	1320.08	1172.24	1066.79	1016.99	963.813	921.99	877.073	841.601	809.726	783.36	759.206	728.322	701.292	678.022	657.661	639.708	623.854	609.707	596.536	584.928	574.554	565.089	556.166	547.624	539.369	531.461	523.568	515.989	508.699	501.654	494.195	482.601	469.928	457.47
47 Rest of Latin America	9420.64	9558.19	8377.9	8505.6	8495.2	8414.63	8445.45	8269.02	8252.49	8079	7947.55	7257.37	8600.3	9108.73	9841.51	9611.39	10095.6	10816.5	12189.5	13352.5	14568.7	15566.3	16614.4	17614.8	18635.1	19615.5	20315.9	21017.5	21739.1	22474.5	23223.9	23990.5	24772.4	25552.4	26359	27187.9	28032.9	28883.9	29737	30590.5	31448.8	32298.5	33154.2	34016.6	34885.6	35728.9	36349.1	36885.3	37401.5
48 Korea	2.3058	1.9215	1.3237	0.8967	1.7934	2.2631	1.6653	1.5372	1.6653	1.1529	0.6832	0.6405	0.7758	0.7177	0.6723	0.5526	0.4963	0.4518	0.4301	0.386	0.3383	0.2843	0.2369	0.1957	0.163	0.1381	0.1183	0.1059	0.0992	0.0967	0.0974	0.1004	0.1051	0.1108	0.1176	0.1252	0.1334	0.1421	0.1512	0.1607	0.1704	0.1804	0.1907	0.2014	0.2124	0.2233	0.2307	0.2369	0.2427
49 Taiwan	0	0	0	0	0	0	0	0	0	0	0	0	0.0001	0.0001	0.0001	0.0001	0.0001	0.0001	0.0001	0.0001	0.0002	0.0002	0.0002	0.0002	0.0002	0.0002	0.0002	0.0002	0.0002	0.0002	0.0002	0.0002	0.0002	0.0002	0.0002	0.0002	0.0003	0.0003	0.0003	0.0003	0.0003	0.0003	0.0003	0.0003	0.0003	0.0003	0.0003	0.0004	0.0004
50 Indonesia	2195.1	2077.6	1970.9	2021.93	1957.51	1950	1864.5	1784.59	1704.13	1631.52	1623.5	1724.48	1787.13	1722.8	1669.63	1581.58	1524.98	1478.96	1455.43	1424.29	1394.85	1359.81	1327.27	1294.66	1263.83	1233.32	1197.74	1163.96	1132.31	1102.55	1074.57	1048.36	1023.79	1000.42	978.747	958.599	939.771	922.008	905.183	889.216	874.134	859.658	846.005	833.132	820.995	809.03	794.08	778.492	763.291
51 Rest of ASEAN	1702.22	1674.34	1609.26	1602.84	1631.89	1591.37	1536.67	1634	1606.88	1574	1581.24	1507.79	1608.39	1526.15	1467.12	1351.99	1292.83	1254.15	1257.66	1249.85	1246.54	1233.1	1224.3	1214.77	1207.75	1200.1	1180.71	1163.18	1148.08	1134.84	1123.19	1113.05	1104.11	1095.49	1088.16	1081.76	1075.88	1070.02	1063.95	1057.56	1050.92	1043.56	1035.93	1028.01	1019.75	1010.18	993.701	974.883	955.717
52 OPEC excl Venezuela	24866.7	25753.5	25743.9	26493.2	24461.3	24797.9	26600.6	25923.8	25992.2	26126.4	27204.9	31729.8	32025.8	31473.6	30964.6	30295.2	29277.1	28030.4	26409.1	25039.5	23756.7	22594.4	21499.7	20491.9	19526.7	18632.8	17903.8	17205.4	16528.4	15875.2	15245.8	14638.5	14053.8	13496.6	12957.5	12437.8	11938.8	11462.6	11008.9	10577	10165.1	9774.58	9401.49	9044.98	8704.33	8384.01	8111.98	7862.79	7625.3
53 Rest of world	7081.6	7233.6	7482.87	7541.7	7806.96	7963.56	7594.06	7087.53	7050.56	6984.44	6798.38	6617.3	6801.56	6763.4	6750.9	6621.65	6579.43	6563.32	6614.94	6637.53	6661.09	6660.13	6662.06	6658	6654.57	6646.69	6614.19	6582.1	6552.05	6523.5	6496.45	6471.17	6447.52	6424.11	6403.21	6384.45	6367.34	6351.09	6335.43	6320.24	6305.85	6291.29	6277.69	6265.06	6253.41	6240.4	6211.8	6177.86	6143.3
54 Ukraine	132.5	140.579	139.275	133.973	122.192	108.643	102.584	96.3563	91.3912	85.9212	78.9785	68.291	78.1361	81.5947	86.6662	84.75	88.0087	92.9599	102.549	110.569	118.903	125.641	132.686	139.349	146.103	152.534	157.006	161.46	166.021	170.647	175.336	180.108	184.949	189.742	194.674	199.715	204.822	209.925	215.001	220.035	225.056	229.978	234.894	239.806	244.713	249.413	252.685	255.409	257.984
55 Saudi Arabia	19831	19522.9	18691.5	19554.5	17352.5	17312.6	19741.4	20757.2	20433.2	20593.1	21610.5	22238.7	22401.9	22145.3	21909.2	21583.7	21110.2	20438.1	19439.8	18612.3	17827	17118.4	16441.6	15816.1	15207.2	14640.2	14197.4	13767.2	13342.5	12926.2	12518.8	12119.7	11729.9	11354.4	10985.4	10624.7	10274	9935.86	9610.61	9298.29	8997.51	8710.42	8433.56	8166.6	7909.27	7666.4	7466.72	7285.61	7112.25
56 Nigeria	5235.99	4954.08	4576.79	4381.52	4447.65	5107.07	4937.24	4860.5	4562.47	4551.36	4408.41	3800.25	3958.39	3822.64	3713.48	3515.67	3395.46	3300.35	3259.33	3197.52	3138.12	3063.56	2993.69	2922.44	2854.31	2785.96	2705.07	2627.81	2554.99	2486.04	2420.77	2359.14	2300.86	2245.01	2192.66	2143.45	2096.94	2052.57	2010.1	1969.35	1930.42	1892.71	1856.69	1822.3	1789.42	1756.93	1718.43	1678.8	1640.17
57 South Africa	28.4045	27.7157	0	0	11.7103	12.3181	12.3181	2.1476	2.6743	6.6048	10.3326	10.3731	10.9479	11.1373	11.4118	11.3013	11.4737	11.7347	12.2362	12.6483	13.0733	13.415	13.7726	14.1119	14.4576	14.7892	15.0225	15.257	15.4996	15.7482	16.0031	16.2657	16.5356	16.8068	17.0898	17.3833	17.6854	17.9927	18.304	18.6189	18.9392	19.2601	19.5874	19.9214	20.2624	20.5983	20.8526	21.0778	21.2981
58 Rest of Africa	2031.05	2168.66	2372.23	2335.41	2423.45	2491.72	2530.38	1724.38	1692.69	1701.8	1683.59	1616.73	1826.99	1895.61	1998.41	1952.49	2016.67	2116.76	2315.48	2481.05	2653.72	2792.63	2938.55	3076.71	3217.34	3351.46	3443.37	3535.16	3629.63	3725.84	3823.79	3923.94	4026	4127.4	4232.33	4340.12	4449.85	4560	4669.98	4779.53	4889.27	4997.24	5105.56	5214.3	5323.41	5428.23	5500.23	5559.69	5615.92
59 Africa OPEC	8905.29	9424.57	10112.6	10390.9	9699.86	9661.99	6832.41	8873.04	7881.11	6766.23	6764.31	6597.63	6830.31	6581.11	6372.58	6037.31	5599.21	5198.27	4845.96	4520.71	4227.47	3950.06	3700.22	3471.92	3262.9	3071.39	2894.72	2732.33	2582.83	2445.03	2317.86	2200.38	2091.72	1991.04	1897.8	1811.37	1731.14	1656.57	1587.16	1522.5	1462.24	1405.95	1353.42	1304.37	1258.56	1215.53	1173.59	1133.57	1095.77
60 Malaysia	1512.54	1439.65	1422.15	1431.68	1371.05	1346.59	1185.9	1218.98	1196.42	1236.99	1358.23	1391.45	1443.66	1338.17	1247.22	1136.15	1054.47	984.615	932.727	878.155	827.105	775.487	727.97	683.012	641.424	602.341	563.297	527.387	494.527	464.394	436.757	411.428	388.192	366.753	347.155	329.208	312.731	297.539	283.507	270.531	258.55	247.414	237.131	227.633	218.856	210.597	201.95	193.569	185.708
61 Kazakhstan	2638.61	2812.99	2881	3032.42	3280.36	3415.81	3431.97	3398.23	3506.7	3465.5	3406.8	3345.7	3708.08	3827.06	4003.95	3927.24	4037.98	4209.28	4545.84	4824.51	5113.26	5344.71	5586.64	5814.93	6046.37	6266.54	6417.94	6568.94	6724.06	6881.81	7042.2	7205.98	7372.72	7538.36	7709.59	7885.39	8064.28	8243.9	8423.41	8602.39	8781.89	8958.85	9136.68	9315.51	9495.31	9668.8	9791.29	9894.56	9993.16
0	Dan_baIEA_SO_covid_S3
RERY	Primary energy supply (before trade), PJ, NER x NR
	2005	2006	2007	2008	2009	2010	2011	2012	2013	2014	2015	2016	2017	2018	2019	2020	2021	2022	2023	2024	2025	2026	2027	2028	2029	2030	2031	2032	2033	2034	2035	2036	2037	2038	2039	2040	2041	2042	2043	2044	2045	2046	2047	2048	2049	2050	2051	2052	2053
1 Belgium	0	0	0	0	0	0	0	0	0	0	0	0	0	0	0	0	0	0	0	0	0	0	0	0	0	0	0	0	0	0	0	0	0	0	0	0	0	0	0	0	0	0	0	0	0	0	0	0	0
2 Denmark	796.231	724.077	652.267	603.505	554.829	522.751	470.463	429.14	373.369	349.633	330.662	297.748	322.363	310.052	300.791	278.167	263.552	252.235	246.453	237.841	230.025	221.105	212.328	203.501	195.155	186.965	177.852	169.303	161.427	154.16	147.464	141.315	135.669	130.429	125.671	121.345	117.4	113.776	110.44	107.365	104.546	101.924	99.5266	97.3367	95.3363	93.4238	91.0727	88.6685	86.3819
3 Germany	149.076	145.242	144.184	129.817	117.795	105.667	111.855	110.77	112.328	103.546	102.607	100.184	108.539	110.72	113.95	111.93	112.469	114.081	118.007	120.687	123.658	125.966	128.149	130.07	131.988	133.712	134.551	135.342	136.172	137.028	137.905	138.814	139.745	140.652	141.608	142.599	143.61	144.611	145.594	146.554	147.504	148.41	149.31	150.206	151.096	151.909	152.201	152.294	152.341
4 Greece	3.3961	3.1671	2.8237	2.2513	3.0526	4.3882	3.7395	3.5869	2.6711	2.4421	2.3658	6.7158	6.9558	6.8305	6.7453	6.506	6.3522	6.2384	6.2067	6.1451	6.1033	6.0483	5.998	5.9469	5.9044	5.8628	5.7925	5.7267	5.6689	5.6185	5.5754	5.5398	5.5115	5.488	5.4729	5.4654	5.4648	5.4696	5.4791	5.4928	5.5114	5.5326	5.5586	5.5891	5.6241	5.659	5.6657	5.6631	5.6603
5 Spain	7.0824	5.9304	6.0584	5.4185	4.4798	5.2478	4.2665	6.0584	15.7007	13.0128	9.8983	6.0158	7.2417	7.6582	8.2789	8.0127	8.1881	8.5609	9.3871	10.0185	10.7421	11.3556	11.964	12.5311	13.1131	13.6614	13.9982	14.3247	14.6627	15.0077	15.3587	15.7172	16.0805	16.4348	16.7994	17.1699	17.5406	17.9027	18.2527	18.588	18.9109	19.2113	19.4988	19.7729	20.0326	20.2565	20.3172	20.3097	20.2792
6 France	46.1607	45.134	41.6687	41.7115	38.4601	38.3318	38.289	34.5243	33.9253	32.7703	35.7221	34.8665	41.5086	44.0308	47.6523	46.5322	47.7715	50.0831	54.8547	58.6102	62.8981	66.6415	70.4076	74.0071	77.7484	81.3742	83.9132	86.4497	89.105	91.8612	94.7176	97.6879	100.763	103.869	107.122	110.504	113.989	117.532	121.115	124.727	128.385	132.031	135.726	139.472	143.266	146.969	149.727	152.125	154.448
7 Ireland	0	0	0	0	0	0	0	0	0	0	0	0	0.0012	0.0012	0.0013	0.0013	0.0013	0.0013	0.0014	0.0015	0.0016	0.0017	0.0017	0.0018	0.0019	0.0019	0.002	0.002	0.0021	0.0021	0.0022	0.0022	0.0023	0.0023	0.0024	0.0025	0.0025	0.0026	0.0026	0.0027	0.0028	0.0028	0.0029	0.003	0.003	0.0031	0.0031	0.0032	0.0032
8 Italy	255.806	241.49	245.3	218.509	190.505	212.649	221.188	225.918	230.314	241.323	229.018	156.838	185.34	196.301	212.132	207.322	212.816	223.043	244.204	261.029	280.363	297.397	314.656	331.277	348.66	365.632	377.708	389.841	402.595	415.893	429.739	444.202	459.247	474.533	490.61	507.403	524.797	542.582	560.678	579.038	597.748	616.525	635.672	655.198	675.099	694.695	709.746	723.107	736.18
9 Luxembourg	0	0	0	0	0	0	0	0	0	0	0	0	0.0018	0.002	0.0021	0.0021	0.0022	0.0023	0.0025	0.0027	0.003	0.0032	0.0034	0.0036	0.0038	0.004	0.0041	0.0043	0.0044	0.0046	0.0047	0.0049	0.0051	0.0053	0.0055	0.0057	0.0059	0.0061	0.0064	0.0066	0.0068	0.0071	0.0073	0.0075	0.0078	0.008	0.0082	0.0084	0.0086
10 Netherlands	63.7084	57.5596	88.3036	73.9137	56.0224	43.554	46.1587	47.4397	47.9094	65.1175	59.6194	40.846	44.7201	45.1367	46.0556	44.5057	44.185	44.3742	45.6394	46.3134	47.1099	47.5834	47.9845	48.2498	48.4983	48.643	48.3844	48.1009	47.8303	47.5648	47.3024	47.0454	46.7893	46.5143	46.2494	45.988	45.7226	45.4422	45.1437	44.8259	44.4933	44.1354	43.7658	43.3852	42.994	42.5695	41.9748	41.3206	40.6578
11 Austria	36.3279	36.6911	34.0145	38.5108	40.1153	38.3618	31.5177	35.7028	35.8184	40.4842	36.2956	33.3891	33.9797	33.6018	33.3116	32.651	32.1864	31.8103	31.6165	31.3438	31.1057	30.8294	30.5552	30.2717	29.9989	29.7212	29.3824	29.0487	28.7272	28.4162	28.1157	27.8259	27.5461	27.2721	27.0098	26.7578	26.5146	26.2776	26.0458	25.8185	25.5964	25.3767	25.1621	24.9526	24.7479	24.5417	24.297	24.0407	23.7853
12 Portugal	0	0	0	0	0	0	0	0	0	0	0	0	0	0	0	0	0	0	0	0	0	0	0	0	0	0	0	0	0	0	0	0	0	0	0	0	0	0	0	0	0	0	0	0	0	0	0	0	0
13 Finland	0	0	0	0	0	0	0	0	0	0	0	0	0	0	0	0	0	0	0	0	0	0	0	0	0	0	0	0	0	0	0	0	0	0	0	0	0	0	0	0	0	0	0	0	0	0	0	0	0
14 Sweden	0	0	0	0	0	0	0	0	0	0	0	0	0.0211	0.0223	0.0239	0.0235	0.0241	0.0252	0.0274	0.0292	0.0313	0.0331	0.035	0.0368	0.0387	0.0405	0.0419	0.0432	0.0446	0.0461	0.0476	0.0492	0.0509	0.0526	0.0544	0.0563	0.0582	0.0602	0.0623	0.0643	0.0665	0.0686	0.0708	0.073	0.0753	0.0776	0.0794	0.081	0.0826
15 UK	3350.73	3024.51	3051.45	2840.67	2724.57	2517.56	2106.57	1823.84	1667.88	1625.28	1857.41	1921.61	2031.19	2010.49	2005.13	1931.38	1893.52	1871.25	1880.87	1875.31	1875.02	1867.13	1858.87	1848.32	1839	1828.23	1806.48	1785.24	1765.7	1747.61	1730.89	1715.6	1701.62	1688.22	1676.38	1665.89	1656.46	1647.66	1639.33	1631.37	1623.89	1616.41	1609.42	1602.88	1596.76	1590.02	1576.54	1560.8	1544.92
16 Czech Republic	13.1022	11.1258	10.3509	10.164	9.324	7.4624	6.996	6.6144	6.5298	6.36	5.4272	4.9608	5.5368	5.1761	4.9177	4.3658	4.032	3.7953	3.7077	3.5691	3.4661	3.3486	3.2457	3.1497	3.0728	3.0036	2.907	2.824	2.7568	2.7026	2.6593	2.6259	2.6004	2.5794	2.5653	2.5565	2.5513	2.5477	2.5446	2.5413	2.5379	2.5327	2.5271	2.5209	2.5139	2.5027	2.4677	2.4245	2.3801
17 Estonia	0	0	0	0	0	0	0	0	0	0	0	0	0.0487	0.052	0.0567	0.0554	0.0571	0.0602	0.0665	0.0716	0.0775	0.0827	0.0879	0.093	0.0983	0.1035	0.1073	0.1111	0.1151	0.1193	0.1236	0.1282	0.1329	0.1377	0.1428	0.1482	0.1537	0.1594	0.1652	0.1711	0.1771	0.1832	0.1894	0.1958	0.2023	0.2087	0.2138	0.2184	0.2229
18 Cyprus	0	0	0	0	0	0	0	0	0	0	0	0	0.0028	0.0029	0.003	0.003	0.003	0.0031	0.0032	0.0033	0.0034	0.0035	0.0036	0.0037	0.0038	0.0039	0.0039	0.004	0.004	0.0041	0.0041	0.0042	0.0042	0.0043	0.0044	0.0044	0.0045	0.0045	0.0046	0.0046	0.0047	0.0048	0.0048	0.0049	0.0049	0.005	0.005	0.0051	0.0051
19 Latvia	0	0	0	0	0	0	0	0	0	0	0	0	0	0	0	0	0	0	0	0	0	0	0	0	0	0.0001	0.0001	0.0001	0.0001	0.0001	0.0001	0.0001	0.0001	0.0001	0.0001	0.0001	0.0001	0.0001	0.0001	0.0001	0.0001	0.0001	0.0001	0.0001	0.0001	0.0001	0.0001	0.0001	0.0001
20 Lithuania	9.2102	7.7178	6.5881	5.4758	4.9197	4.9197	4.8769	4.3636	3.6791	3.508	3.1455	2.7085	3.0691	3.1867	3.3546	3.2841	3.3305	3.4271	3.634	3.785	3.9518	4.0879	4.2184	4.3364	4.4541	4.5619	4.6259	4.6869	4.7491	4.8117	4.8744	4.9375	5.0006	5.0612	5.1227	5.1844	5.2453	5.304	5.3601	5.4133	5.4641	5.5109	5.5555	5.5978	5.6378	5.6725	5.6839	5.6857	5.6845
21 Hungary	38.9628	37.0348	35.056	33.9079	33.0638	30.6812	27.5462	27.1282	25.0382	24.4112	26.0414	29.7616	30.6428	29.1783	27.9028	26.1928	24.8317	23.6528	22.7558	21.805	20.9417	20.0785	19.2628	18.4803	17.752	17.0584	16.338	15.6619	15.0349	14.453	13.9136	13.4148	12.9537	12.5242	12.1306	11.7697	11.4384	11.1326	10.8498	10.5883	10.3475	10.1233	9.9176	9.7293	9.5572	9.3939	9.1995	9.0014	8.8124
22 Malta	0	0	0	0	0	0	0	0	0	0	0	0	0	0	0	0	0	0	0	0	0	0	0	0	0	0	0	0	0	0	0	0	0	0	0	0	0	0	0	0	0	0	0	0	0	0	0	0	0
23 Poland	35.4133	33.9335	30.5949	32.271	29.0072	29.2023	26.2367	28.9554	41.113	40.5963	39.5792	42.5425	44.267	42.5419	41.1664	38.8028	37.1065	35.7443	34.9693	34.0292	33.2445	32.4037	31.6179	30.8512	30.1564	29.4859	28.6808	27.9251	27.2342	26.6011	26.0214	25.4933	25.0119	24.563	24.1603	23.7977	23.4685	23.164	22.8797	22.6122	22.362	22.1201	21.8926	21.678	21.4744	21.265	20.9561	20.6175	20.2812
24 Slovenia	0	0	0	0	0	0	0	0	0	0	0	0	0.0001	0.0001	0.0001	0.0001	0.0001	0.0001	0.0001	0.0001	0.0001	0.0001	0.0001	0.0001	0.0001	0.0001	0.0001	0.0001	0.0001	0.0001	0.0001	0.0001	0.0001	0.0001	0.0001	0.0001	0.0001	0.0001	0.0001	0.0001	0.0001	0.0001	0.0001	0.0001	0.0001	0.0001	0.0001	0.0001	0.0001
25 Slovakia	1.2772	1.162	0.9086	0.7416	0.618	0.5356	0.618	0.4532	0.412	0.3708	0.412	0.3457	0.421	0.4459	0.4846	0.4671	0.4781	0.5022	0.557	0.6001	0.6508	0.6953	0.7405	0.784	0.8298	0.8742	0.9039	0.9335	0.9647	0.9972	1.031	1.0661	1.1026	1.1391	1.1775	1.2173	1.2581	1.2992	1.3402	1.3811	1.4218	1.4615	1.501	1.5402	1.579	1.6153	1.6366	1.6515	1.6644
26 Bulgaria	1.2216	1.1402	1.0588	0.9773	1.018	0.9366	0.8958	0.9773	1.1402	1.0588	1.018	0.9773	1.1229	1.1752	1.2529	1.2241	1.2485	1.2976	1.4036	1.4874	1.5847	1.6702	1.757	1.8408	1.9287	2.0146	2.0746	2.1349	2.1986	2.2652	2.3348	2.4077	2.4838	2.5611	2.6427	2.7282	2.8168	2.9076	2.9999	3.0937	3.1893	3.2851	3.3828	3.4825	3.5841	3.6838	3.7587	3.8241	3.8878
27 Romania	211.932	194.132	184.582	184.582	178.243	169.383	165.604	156.867	164.304	161.052	158.573	149.795	155.008	148.094	142.218	133.62	127.019	121.424	117.459	113.085	109.168	105.171	101.39	97.7397	94.3558	91.1223	87.6478	84.3884	81.3811	78.6061	76.0517	73.7131	71.5775	69.6094	67.8443	66.2688	64.8672	63.6182	62.511	61.5381	60.7023	59.9789	59.388	58.9279	58.596	58.337	57.8107	57.2374	56.7252
28 Norway	5289.36	4874.78	4710.71	4510.35	4230.81	3627.7	3463.9	3115.18	2998.44	3129.22	3197.75	3369.08	3465.52	3355.58	3261.71	3115.13	3002.28	2905.5	2836.31	2757.32	2684.32	2607.86	2533.31	2459.35	2388.36	2318.51	2243.87	2171.91	2103.25	2037.61	1974.83	1914.82	1857.41	1802.11	1749.37	1698.96	1650.66	1604.18	1559.37	1516.12	1474.46	1434.11	1395.24	1357.82	1321.77	1286.6	1249.65	1212.92	1177.34
29 Switzerland	0	0	0	0	0	0	0	0	0	0	0	0	0	0	0	0	0	0	0	0	0	0.0001	0.0001	0.0001	0.0001	0.0001	0.0001	0.0001	0.0001	0.0001	0.0001	0.0001	0.0001	0.0001	0.0001	0.0001	0.0001	0.0001	0.0001	0.0001	0.0001	0.0001	0.0001	0.0001	0.0001	0.0001	0.0001	0.0001	0.0001
30 Iceland	0	0	0	0	0	0	0	0	0	0	0	0	0	0	0	0	0	0	0	0	0	0	0	0	0	0	0	0	0	0	0	0	0	0	0	0	0	0	0	0	0	0	0	0	0	0	0	0	0
31 Croatia	35.192	34.2168	32.5632	30.4008	28.4142	26.2416	24.708	23.3874	22.8336	23.0466	26.3694	29.1384	30.6556	27.476	24.928	21.9083	19.704	17.9669	16.8048	15.6468	14.6945	13.7914	12.9955	12.2717	11.639	11.06	10.4463	9.8933	9.4012	8.9598	8.5615	8.2008	7.8716	7.5652	7.285	7.0262	6.7847	6.5561	6.338	6.1291	5.9292	5.7353	5.5495	5.3713	5.2003	5.0315	4.8381	4.6429	4.4557
32 Turkey	93.4135	89.3592	88.2836	89.3592	99.3707	110.962	104.837	103.45	106.3	109.261	111.257	113.907	124.134	123.216	124.104	118.124	115.897	115.415	118.593	120.365	122.957	124.835	126.801	128.587	130.611	132.511	132.982	133.505	134.233	135.128	136.179	137.392	138.742	140.126	141.682	143.374	145.159	146.971	148.78	150.567	152.346	154.04	155.718	157.374	159	160.432	160.721	160.558	160.275
33 Macedonia	0	0	0	0	0	0	0	0	0	0	0	0	0	0	0	0	0	0	0	0	0	0	0	0	0	0	0	0	0	0	0	0	0	0	0	0	0	0	0	0	0	0	0	0	0	0	0	0	0
34 USA	11049.7	10886.9	10806.2	10592	11438.4	11690.6	12040.8	13900.6	15931.6	18677.7	19788.3	18695.7	21820.7	22971.7	24637.3	24077.9	24625.5	25675.5	27877.6	29603.1	31578.1	33298.3	35029.9	36684.2	38406	40074.9	41233.9	42392.4	43607.9	44871.7	46183.9	47551	48968.9	50402.9	51907.8	53475.4	55093.4	56740.7	58408.8	60092.9	61801	63505.1	65234.9	66990.6	68771.4	70511.1	71800.3	72918	74000.7
35 Japan	13.4114	11.9185	12.1156	12.3449	11.2139	10.604	10.2904	10.1816	9.525	9.416	8.6247	7.8757	8.0671	7.7501	7.4701	7.0932	6.7879	6.5191	6.3082	6.0829	5.8736	5.662	5.4584	5.26	5.0713	4.8885	4.7001	4.5202	4.3498	4.1882	4.0349	3.8897	3.7521	3.6209	3.4969	3.3796	3.2684	3.1626	3.0618	2.9657	2.8743	2.7867	2.7035	2.6243	2.5489	2.4763	2.4005	2.3258	2.254
36 Canada	4471.85	4835.36	4582.55	4607.41	4340.87	4623.25	4898.68	5342.85	5791.75	6393.04	6616.19	6762.79	7867.59	8278.6	8867.42	8679.8	8877.88	9250.17	10019.3	10620.3	11303.8	11897.6	12492.9	13060.1	13648.3	14216.8	14613.5	15009.4	15423.7	15853.5	16298.6	16761.4	17240.3	17723.9	18230.4	18756.9	19299.4	19851.1	20409.2	20972.2	21542.9	22112.2	22689.7	23275.8	23870.2	24451.6	24887.7	25268.9	25639.4
37 Australia	959.973	854.716	971.937	900.197	928.216	968.902	933.667	871.047	757.07	713.267	676.53	660.811	709.667	718.546	735.285	718.021	717.855	725.415	750.366	768.021	789.352	806.831	824.46	840.937	858.411	875.104	884.342	893.628	903.796	914.716	926.376	938.865	952.115	965.618	980.155	995.597	1011.76	1028.33	1045.19	1062.25	1079.62	1096.9	1114.51	1132.44	1150.66	1168.26	1179.47	1188.26	1196.55
38 New Zealand	37.0783	36.765	82.0259	118.865	112.353	107.793	92.3035	80.6092	69.1055	76.9879	81.0125	68.6763	72.8664	67.699	63.5191	57.4326	53.0771	49.597	47.36	44.8668	42.721	40.5466	38.5373	36.6306	34.9015	33.2703	31.5174	29.9073	28.4501	27.1253	25.9181	24.8181	23.8119	22.8777	22.026	21.245	20.5235	19.8493	19.2154	18.6171	18.0532	17.514	17.0045	16.5223	16.0649	15.6168	15.097	14.5703	14.0647
39 Russian Federation	18900	19261	19699.4	19753.9	20058.5	20394.2	20699.2	20930.2	20932.6	21168.6	21468.9	21952.2	24386.1	24787.3	25551.6	24673.5	24621.5	24930.2	26031	26763.8	27637.5	28313	28973.5	29563.4	30176.9	30738.3	30970.6	31196.2	31449.1	31723	32016.5	32332.4	32666.8	32999.1	33359.3	33741.1	34136.6	34533	34925.3	35310.3	35692	36055.4	36415.3	36771.6	37123	37436.7	37516.3	37504.6	37469.7
40 Rest of Annex I	75.1075	74.8971	74.0555	73.214	72.3724	71.5309	70.7735	69.8478	69.2167	69.2167	69.2167	69.2167	80.638	84.524	90.3134	87.9047	89.5837	93.1168	100.908	106.945	113.909	119.925	125.979	131.736	137.735	143.521	147.39	151.244	155.295	159.508	163.882	168.438	173.158	177.91	182.895	188.079	193.413	198.816	204.252	209.702	215.192	220.617	226.081	231.585	237.119	242.442	246.08	249.054	251.86
41 China	7592.89	7735.78	7800.76	7973.34	7933.57	8499.79	8494.01	8686.69	8788.89	8852.11	8983.03	8360.41	9188.3	9354.95	9651.95	9376.86	9389.15	9529.91	9958.31	10262.3	10624.2	10919.9	11215.5	11489.8	11778.1	12051.3	12201.5	12351.2	12513.7	12686.8	12870.1	13065	13270.2	13477.6	13699.3	13933.3	14176.3	14423.4	14672.4	14922.1	15174.1	15422	15672.2	15924.6	16178.8	16420.2	16561.3	16663.4	16756.3
42 India	1377.38	1454.31	1459.88	1433.77	1441.56	1612.46	1629.83	1620.08	1616.91	1602.92	1580.71	1540.79	1597.13	1556.24	1523.66	1459.04	1413.1	1375.58	1353.27	1324.21	1297.7	1268.22	1238.97	1209.2	1180.33	1151.35	1118.93	1087.39	1057.11	1027.96	999.872	972.823	946.733	921.355	896.96	873.444	850.698	828.585	807.048	786.054	765.627	745.642	726.212	707.324	688.961	670.889	651.818	632.785	614.244
43 Mexico	7746.15	7453.52	7035.63	6622.71	6143.36	6069.83	5982.51	5962.91	5841.82	5628.55	5090.6	4850.47	5016.47	4796.73	4610.12	4337.34	4127.77	3949.96	3823.09	3682.57	3555.26	3424.61	3299.64	3177.82	3063.04	2951.93	2834.03	2722.16	2617.2	2518.49	2425.61	2338.3	2256.11	2178.08	2104.9	2036.1	1971.19	1909.59	1850.99	1795.16	1742.05	1691.16	1642.75	1596.69	1552.85	1510.33	1464.42	1418.67	1374.63
44 Brazil	3529.44	3731.02	3800.15	3935.63	4225.35	4456.36	4562.56	4480.58	4386.14	4894.29	5289.44	5461.37	5917.93	5961.64	6072.73	5880.51	5841.68	5870.02	6044.16	6150.43	6282.24	6377.95	6471.04	6551.58	6636.61	6712.54	6730.12	6747	6769.28	6795.8	6826.33	6861.33	6900.15	6939.13	6983.58	7032.42	7084.24	7136.81	7189.28	7241.13	7293.07	7342.49	7392.05	7441.73	7491.32	7535.12	7538.77	7527.15	7512.16
[truncated: 593 more rows]
[truncated: 13 more columns]

## Sheet: Gas
0	Dan_baIEA_covid_S3
RERY	Primary energy supply (before trade), PJ, NER x NR
[truncated: 766 more rows]
[truncated: 13 more columns]

## Sheet: GDP
0				0	0	0	0	0	1	1	1	1	0	0	0	0	0	1	1	1	1	1	1	1	1	1	1	1	1	1	1	1	0	0	0	0	0	0	0	0	0	0	0	0	0	0
0
0	Dan_baIEA
[truncated: 767 more rows]
[truncated: 17 more columns]

[truncated: 19 more sheets: AssetValueCoal, AssetValueOil, AssetValueGas, AssetValueFF, LossesCoal, LossesOil, LossesGas, LossesFF, LossesGDP, GR, KR, QRFF, QRXFF, KRFF, LossesGR, LossesKR, LossesQRFF, LossesQRXFF, LossesKRFF]
